# Supplementary material for: Single-nucleus multiomic profiling of the aging mouse substantia nigra reveals conserved gene alterations linked to Parkinson's disease
Source: HighWire-hosted journal article supplement (doi:10.1101/gr.281113.125), 2026-04
Supplement: Supplemental_Table_S1.xlsx [file Supplemental_Table_S1.xlsx]

## Sheet: Supplemental_Table_S1
Supplemental Table S1: Annotation of cell types for nuclei in the substantia nigra aging dataset
sample ID	barcode	subclass id	subclass label	subclass label id	class id	class label	class label id
12m_rep1	AAACAGCCATTGTGCA-1	327	Oligo NN	327 Oligo NN	31	OPC-Oligo	31 OPC-Oligo
12m_rep1	AAACATGCAAGCGAGC-1	166	MRN Pou3f1 C1ql4 Glut	166 MRN Pou3f1 C1ql4 Glut	19	MB Glut	19 MB Glut
12m_rep1	AAACATGCATAGCAGG-1	327	Oligo NN	327 Oligo NN	31	OPC-Oligo	31 OPC-Oligo
12m_rep1	AAACATGCATCGCTTT-1	327	Oligo NN	327 Oligo NN	31	OPC-Oligo	31 OPC-Oligo
12m_rep1	AAACATGCATCTAGCA-1	327	Oligo NN	327 Oligo NN	31	OPC-Oligo	31 OPC-Oligo
12m_rep1	AAACATGCATGGAGGC-1	327	Oligo NN	327 Oligo NN	31	OPC-Oligo	31 OPC-Oligo
12m_rep1	AAACCAACAACTAACT-1	197	SNr Six3 Gaba	197 SNr Six3 Gaba	20	MB GABA	20 MB GABA
12m_rep1	AAACCAACACAGCCTG-1	327	Oligo NN	327 Oligo NN	31	OPC-Oligo	31 OPC-Oligo
12m_rep1	AAACCAACAGCCAGTT-1	327	Oligo NN	327 Oligo NN	31	OPC-Oligo	31 OPC-Oligo
12m_rep1	AAACCAACAGTCTAAT-1	101	ZI Pax6 Gaba	101 ZI Pax6 Gaba	12	HY GABA	12 HY GABA
12m_rep1	AAACCAACAGTTTACG-1	199	PAG-MRN-RN Foxa2 Gaba	199 PAG-MRN-RN Foxa2 Gaba	20	MB GABA	20 MB GABA
12m_rep1	AAACCAACATAGCAGG-1	16	CA1-ProS Glut	016 CA1-ProS Glut	1	IT-ET Glut	01 IT-ET Glut
12m_rep1	AAACCAACATCCTAGA-1	327	Oligo NN	327 Oligo NN	31	OPC-Oligo	31 OPC-Oligo
12m_rep1	AAACCAACATGACTAT-1	327	Oligo NN	327 Oligo NN	31	OPC-Oligo	31 OPC-Oligo
12m_rep1	AAACCAACATTCCTCG-1	327	Oligo NN	327 Oligo NN	31	OPC-Oligo	31 OPC-Oligo
12m_rep1	AAACCGAAGAAAGCAT-1	327	Oligo NN	327 Oligo NN	31	OPC-Oligo	31 OPC-Oligo
12m_rep1	AAACCGAAGTGAGGGT-1	327	Oligo NN	327 Oligo NN	31	OPC-Oligo	31 OPC-Oligo
12m_rep1	AAACCGAAGTTAGAGG-1	327	Oligo NN	327 Oligo NN	31	OPC-Oligo	31 OPC-Oligo
12m_rep1	AAACCGCGTGAGCGAA-1	327	Oligo NN	327 Oligo NN	31	OPC-Oligo	31 OPC-Oligo
12m_rep1	AAACCGGCACGGTTTA-1	16	CA1-ProS Glut	016 CA1-ProS Glut	1	IT-ET Glut	01 IT-ET Glut
12m_rep1	AAACGCGCAAGTGTTT-1	327	Oligo NN	327 Oligo NN	31	OPC-Oligo	31 OPC-Oligo
12m_rep1	AAACGCGCAGGTCCTG-1	16	CA1-ProS Glut	016 CA1-ProS Glut	1	IT-ET Glut	01 IT-ET Glut
12m_rep1	AAACGCGCAGTTTACG-1	327	Oligo NN	327 Oligo NN	31	OPC-Oligo	31 OPC-Oligo
12m_rep1	AAACGCGCATCAGTAT-1	327	Oligo NN	327 Oligo NN	31	OPC-Oligo	31 OPC-Oligo
12m_rep1	AAACGCGCATCCCTCA-1	327	Oligo NN	327 Oligo NN	31	OPC-Oligo	31 OPC-Oligo
12m_rep1	AAACGCGCATCCTGAA-1	327	Oligo NN	327 Oligo NN	31	OPC-Oligo	31 OPC-Oligo
12m_rep1	AAACGCGCATGAGTTT-1	327	Oligo NN	327 Oligo NN	31	OPC-Oligo	31 OPC-Oligo
12m_rep1	AAACGGATCCCTTGCG-1	327	Oligo NN	327 Oligo NN	31	OPC-Oligo	31 OPC-Oligo
12m_rep1	AAACGGATCCTAATGA-1	327	Oligo NN	327 Oligo NN	31	OPC-Oligo	31 OPC-Oligo
12m_rep1	AAACGGATCGAGGAAC-1	327	Oligo NN	327 Oligo NN	31	OPC-Oligo	31 OPC-Oligo
12m_rep1	AAACGTACACCATATG-1	327	Oligo NN	327 Oligo NN	31	OPC-Oligo	31 OPC-Oligo
12m_rep1	AAACGTACAGCGCTTG-1	101	ZI Pax6 Gaba	101 ZI Pax6 Gaba	12	HY GABA	12 HY GABA
12m_rep1	AAACGTACAGGCTAAG-1	197	SNr Six3 Gaba	197 SNr Six3 Gaba	20	MB GABA	20 MB GABA
12m_rep1	AAACGTACATAATCGT-1	327	Oligo NN	327 Oligo NN	31	OPC-Oligo	31 OPC-Oligo
12m_rep1	AAAGCAAGTTCGCTCA-1	327	Oligo NN	327 Oligo NN	31	OPC-Oligo	31 OPC-Oligo
12m_rep1	AAAGCAAGTTTACTTG-1	166	MRN Pou3f1 C1ql4 Glut	166 MRN Pou3f1 C1ql4 Glut	19	MB Glut	19 MB Glut
12m_rep1	AAAGCACCACAAAGGT-1	16	CA1-ProS Glut	016 CA1-ProS Glut	1	IT-ET Glut	01 IT-ET Glut
12m_rep1	AAAGCACCACCAGGTT-1	327	Oligo NN	327 Oligo NN	31	OPC-Oligo	31 OPC-Oligo
12m_rep1	AAAGCACCATAGCAGG-1	135	STN-PSTN Pitx2 Glut	135 STN-PSTN Pitx2 Glut	14	HY Glut	14 HY Glut
12m_rep1	AAAGCACCATGTTTGG-1	327	Oligo NN	327 Oligo NN	31	OPC-Oligo	31 OPC-Oligo
12m_rep1	AAAGCCCGTAAACAAG-1	138	PH Pitx2 Glut	138 PH Pitx2 Glut	14	HY Glut	14 HY Glut
12m_rep1	AAAGCCCGTCACGAAC-1	327	Oligo NN	327 Oligo NN	31	OPC-Oligo	31 OPC-Oligo
12m_rep1	AAAGCCCGTCCTTCTC-1	327	Oligo NN	327 Oligo NN	31	OPC-Oligo	31 OPC-Oligo
12m_rep1	AAAGCCCGTTGCAATG-1	197	SNr Six3 Gaba	197 SNr Six3 Gaba	20	MB GABA	20 MB GABA
12m_rep1	AAAGCCCGTTTCAGGA-1	197	SNr Six3 Gaba	197 SNr Six3 Gaba	20	MB GABA	20 MB GABA
12m_rep1	AAAGCCCGTTTGTCTA-1	197	SNr Six3 Gaba	197 SNr Six3 Gaba	20	MB GABA	20 MB GABA
12m_rep1	AAAGCCGCACCCTCAC-1	334	Microglia NN	334 Microglia NN	34	Immune	34 Immune
12m_rep1	AAAGCGGGTTGTCCAT-1	197	SNr Six3 Gaba	197 SNr Six3 Gaba	20	MB GABA	20 MB GABA
12m_rep1	AAAGCGGGTTTGTCTA-1	197	SNr Six3 Gaba	197 SNr Six3 Gaba	20	MB GABA	20 MB GABA
12m_rep1	AAAGCTTGTAAGTCGC-1	327	Oligo NN	327 Oligo NN	31	OPC-Oligo	31 OPC-Oligo
12m_rep1	AAAGCTTGTTCAAGCA-1	318	Astro-NT NN	318 Astro-NT NN	30	Astro-Epen	30 Astro-Epen
12m_rep1	AAAGCTTGTTGAAGCC-1	327	Oligo NN	327 Oligo NN	31	OPC-Oligo	31 OPC-Oligo
12m_rep1	AAAGGACGTAAGCTCA-1	166	MRN Pou3f1 C1ql4 Glut	166 MRN Pou3f1 C1ql4 Glut	19	MB Glut	19 MB Glut
12m_rep1	AAAGGACGTACCGAAC-1	327	Oligo NN	327 Oligo NN	31	OPC-Oligo	31 OPC-Oligo
12m_rep1	AAAGGACGTCTCAGCC-1	327	Oligo NN	327 Oligo NN	31	OPC-Oligo	31 OPC-Oligo
12m_rep1	AAAGGACGTTTGGGTA-1	327	Oligo NN	327 Oligo NN	31	OPC-Oligo	31 OPC-Oligo
12m_rep1	AAAGGAGCAGCTTACA-1	327	Oligo NN	327 Oligo NN	31	OPC-Oligo	31 OPC-Oligo
12m_rep1	AAAGGAGCAGCTTAGC-1	197	SNr Six3 Gaba	197 SNr Six3 Gaba	20	MB GABA	20 MB GABA
12m_rep1	AAAGGAGCAGGCTGTT-1	16	CA1-ProS Glut	016 CA1-ProS Glut	1	IT-ET Glut	01 IT-ET Glut
12m_rep1	AAAGGAGCAGTATGTT-1	16	CA1-ProS Glut	016 CA1-ProS Glut	1	IT-ET Glut	01 IT-ET Glut
12m_rep1	AAAGGAGCATACCCGG-1	327	Oligo NN	327 Oligo NN	31	OPC-Oligo	31 OPC-Oligo
12m_rep1	AAAGGCTCAATCTCTC-1	197	SNr Six3 Gaba	197 SNr Six3 Gaba	20	MB GABA	20 MB GABA
12m_rep1	AAAGGCTCAGCACGTT-1	197	SNr Six3 Gaba	197 SNr Six3 Gaba	20	MB GABA	20 MB GABA
12m_rep1	AAAGGCTCAGCCTAAC-1	101	ZI Pax6 Gaba	101 ZI Pax6 Gaba	12	HY GABA	12 HY GABA
12m_rep1	AAAGGCTCATAACGGG-1	327	Oligo NN	327 Oligo NN	31	OPC-Oligo	31 OPC-Oligo
12m_rep1	AAAGGCTCATTGGGAG-1	327	Oligo NN	327 Oligo NN	31	OPC-Oligo	31 OPC-Oligo
12m_rep1	AAAGGTTAGATAAAGC-1	135	STN-PSTN Pitx2 Glut	135 STN-PSTN Pitx2 Glut	14	HY Glut	14 HY Glut
12m_rep1	AAAGGTTAGCGATAAG-1	197	SNr Six3 Gaba	197 SNr Six3 Gaba	20	MB GABA	20 MB GABA
12m_rep1	AAAGGTTAGCTTAGTA-1	135	STN-PSTN Pitx2 Glut	135 STN-PSTN Pitx2 Glut	14	HY Glut	14 HY Glut
12m_rep1	AAAGGTTAGGATCCGC-1	327	Oligo NN	327 Oligo NN	31	OPC-Oligo	31 OPC-Oligo
12m_rep1	AAAGGTTAGGTCTTGG-1	197	SNr Six3 Gaba	197 SNr Six3 Gaba	20	MB GABA	20 MB GABA
12m_rep1	AAATCCGGTAACCTAG-1	166	MRN Pou3f1 C1ql4 Glut	166 MRN Pou3f1 C1ql4 Glut	19	MB Glut	19 MB Glut
12m_rep1	AAATCCGGTCCAAGAC-1	327	Oligo NN	327 Oligo NN	31	OPC-Oligo	31 OPC-Oligo
12m_rep1	AAATCCGGTGCTGGTG-1	195	SNr-VTA Pax5 Npas1 Gaba	195 SNr-VTA Pax5 Npas1 Gaba	20	MB GABA	20 MB GABA
12m_rep1	AAATCCGGTGTTTGAG-1	138	PH Pitx2 Glut	138 PH Pitx2 Glut	14	HY Glut	14 HY Glut
12m_rep1	AAATCCGGTTTGGGTA-1	197	SNr Six3 Gaba	197 SNr Six3 Gaba	20	MB GABA	20 MB GABA
12m_rep1	AAATGCCTCAATTACG-1	334	Microglia NN	334 Microglia NN	34	Immune	34 Immune
12m_rep1	AAATGCCTCAGGATGA-1	16	CA1-ProS Glut	016 CA1-ProS Glut	1	IT-ET Glut	01 IT-ET Glut
12m_rep1	AAATGCCTCAGTGAAG-1	197	SNr Six3 Gaba	197 SNr Six3 Gaba	20	MB GABA	20 MB GABA
12m_rep1	AAATGCCTCCGCATGA-1	334	Microglia NN	334 Microglia NN	34	Immune	34 Immune
12m_rep1	AAATGCCTCGACCTGA-1	327	Oligo NN	327 Oligo NN	31	OPC-Oligo	31 OPC-Oligo
12m_rep1	AAATGCCTCGGTTAGT-1	16	CA1-ProS Glut	016 CA1-ProS Glut	1	IT-ET Glut	01 IT-ET Glut
12m_rep1	AAATGCCTCGTTAAGC-1	327	Oligo NN	327 Oligo NN	31	OPC-Oligo	31 OPC-Oligo
12m_rep1	AAATGCCTCTCATCAT-1	327	Oligo NN	327 Oligo NN	31	OPC-Oligo	31 OPC-Oligo
12m_rep1	AAATGGCCAGCTTACA-1	327	Oligo NN	327 Oligo NN	31	OPC-Oligo	31 OPC-Oligo
12m_rep1	AAATGGCCATGATTGT-1	327	Oligo NN	327 Oligo NN	31	OPC-Oligo	31 OPC-Oligo
12m_rep1	AACAAAGGTAGCCATA-1	327	Oligo NN	327 Oligo NN	31	OPC-Oligo	31 OPC-Oligo
12m_rep1	AACAAAGGTCGCAATA-1	159	IF-RL-CLI-PAG Foxa1 Glut	159 IF-RL-CLI-PAG Foxa1 Glut	19	MB Glut	19 MB Glut
12m_rep1	AACAAAGGTTACCGGG-1	197	SNr Six3 Gaba	197 SNr Six3 Gaba	20	MB GABA	20 MB GABA
12m_rep1	AACAAAGGTTTGTTGC-1	327	Oligo NN	327 Oligo NN	31	OPC-Oligo	31 OPC-Oligo
12m_rep1	AACAAGCCACATACTG-1	334	Microglia NN	334 Microglia NN	34	Immune	34 Immune
12m_rep1	AACAAGCCACTATGGC-1	327	Oligo NN	327 Oligo NN	31	OPC-Oligo	31 OPC-Oligo
12m_rep1	AACAAGCCAGCAATAA-1	197	SNr Six3 Gaba	197 SNr Six3 Gaba	20	MB GABA	20 MB GABA
12m_rep1	AACAAGCCAGCTTAAT-1	327	Oligo NN	327 Oligo NN	31	OPC-Oligo	31 OPC-Oligo
12m_rep1	AACAAGCCATAATGAG-1	334	Microglia NN	334 Microglia NN	34	Immune	34 Immune
12m_rep1	AACAAGCCATCACTTC-1	318	Astro-NT NN	318 Astro-NT NN	30	Astro-Epen	30 Astro-Epen
12m_rep1	AACAAGCCATGAAATG-1	327	Oligo NN	327 Oligo NN	31	OPC-Oligo	31 OPC-Oligo
12m_rep1	AACAAGCCATTAAGTC-1	327	Oligo NN	327 Oligo NN	31	OPC-Oligo	31 OPC-Oligo
12m_rep1	AACAGATAGATACTTG-1	135	STN-PSTN Pitx2 Glut	135 STN-PSTN Pitx2 Glut	14	HY Glut	14 HY Glut
12m_rep1	AACAGATAGTCAGTAC-1	197	SNr Six3 Gaba	197 SNr Six3 Gaba	20	MB GABA	20 MB GABA
12m_rep1	AACAGCAAGCAAGGAC-1	327	Oligo NN	327 Oligo NN	31	OPC-Oligo	31 OPC-Oligo
12m_rep1	AACAGCAAGCTTAGTA-1	166	MRN Pou3f1 C1ql4 Glut	166 MRN Pou3f1 C1ql4 Glut	19	MB Glut	19 MB Glut
12m_rep1	AACAGCAAGGTCTTGG-1	327	Oligo NN	327 Oligo NN	31	OPC-Oligo	31 OPC-Oligo
12m_rep1	AACAGGATCAAGCTTA-1	327	Oligo NN	327 Oligo NN	31	OPC-Oligo	31 OPC-Oligo
12m_rep1	AACAGGATCAAGTGAG-1	327	Oligo NN	327 Oligo NN	31	OPC-Oligo	31 OPC-Oligo
12m_rep1	AACAGGATCCTCATGC-1	16	CA1-ProS Glut	016 CA1-ProS Glut	1	IT-ET Glut	01 IT-ET Glut
12m_rep1	AACAGGATCCTTCGTA-1	327	Oligo NN	327 Oligo NN	31	OPC-Oligo	31 OPC-Oligo
12m_rep1	AACAGGATCTAATCTC-1	135	STN-PSTN Pitx2 Glut	135 STN-PSTN Pitx2 Glut	14	HY Glut	14 HY Glut
12m_rep1	AACAGGATCTTGTTCG-1	135	STN-PSTN Pitx2 Glut	135 STN-PSTN Pitx2 Glut	14	HY Glut	14 HY Glut
12m_rep1	AACATAGCACAATGTT-1	195	SNr-VTA Pax5 Npas1 Gaba	195 SNr-VTA Pax5 Npas1 Gaba	20	MB GABA	20 MB GABA
12m_rep1	AACATAGCATTGTGAT-1	197	SNr Six3 Gaba	197 SNr Six3 Gaba	20	MB GABA	20 MB GABA
12m_rep1	AACATCATCCCTCTAA-1	327	Oligo NN	327 Oligo NN	31	OPC-Oligo	31 OPC-Oligo
12m_rep1	AACATCATCGATTCTT-1	327	Oligo NN	327 Oligo NN	31	OPC-Oligo	31 OPC-Oligo
12m_rep1	AACATCATCGCATTAA-1	197	SNr Six3 Gaba	197 SNr Six3 Gaba	20	MB GABA	20 MB GABA
12m_rep1	AACATCATCGGCTAGC-1	135	STN-PSTN Pitx2 Glut	135 STN-PSTN Pitx2 Glut	14	HY Glut	14 HY Glut
12m_rep1	AACATTGTCCGTAAAC-1	334	Microglia NN	334 Microglia NN	34	Immune	34 Immune
12m_rep1	AACCCGCAGACAACGA-1	334	Microglia NN	334 Microglia NN	34	Immune	34 Immune
12m_rep1	AACCCGCAGCAAGATG-1	93	RT-ZI Gnb3 Gaba	093 RT-ZI Gnb3 Gaba	12	HY GABA	12 HY GABA
12m_rep1	AACCGCTCAACCCTAA-1	327	Oligo NN	327 Oligo NN	31	OPC-Oligo	31 OPC-Oligo
12m_rep1	AACCGCTCAATGAGGT-1	327	Oligo NN	327 Oligo NN	31	OPC-Oligo	31 OPC-Oligo
12m_rep1	AACCGCTCACCTCAGG-1	197	SNr Six3 Gaba	197 SNr Six3 Gaba	20	MB GABA	20 MB GABA
12m_rep1	AACCGCTCACGAATCC-1	16	CA1-ProS Glut	016 CA1-ProS Glut	1	IT-ET Glut	01 IT-ET Glut
12m_rep1	AACCGCTCAGAAATTG-1	327	Oligo NN	327 Oligo NN	31	OPC-Oligo	31 OPC-Oligo
12m_rep1	AACCGCTCATTGCGAC-1	195	SNr-VTA Pax5 Npas1 Gaba	195 SNr-VTA Pax5 Npas1 Gaba	20	MB GABA	20 MB GABA
12m_rep1	AACCGGCTCGCCTAAG-1	327	Oligo NN	327 Oligo NN	31	OPC-Oligo	31 OPC-Oligo
12m_rep1	AACCGGCTCTAACCTT-1	327	Oligo NN	327 Oligo NN	31	OPC-Oligo	31 OPC-Oligo
12m_rep1	AACCGGCTCTACTAAG-1	327	Oligo NN	327 Oligo NN	31	OPC-Oligo	31 OPC-Oligo
12m_rep1	AACCTAATCATTGTTC-1	156	MB-ant-ve Dmrta2 Glut	156 MB-ant-ve Dmrta2 Glut	19	MB Glut	19 MB Glut
12m_rep1	AACCTAATCCCATAAA-1	327	Oligo NN	327 Oligo NN	31	OPC-Oligo	31 OPC-Oligo
12m_rep1	AACCTAATCCCTGTTA-1	16	CA1-ProS Glut	016 CA1-ProS Glut	1	IT-ET Glut	01 IT-ET Glut
12m_rep1	AACCTAATCCGGGACT-1	327	Oligo NN	327 Oligo NN	31	OPC-Oligo	31 OPC-Oligo
12m_rep1	AACCTAATCTCCTCAA-1	135	STN-PSTN Pitx2 Glut	135 STN-PSTN Pitx2 Glut	14	HY Glut	14 HY Glut
12m_rep1	AACCTCACACCCACAG-1	327	Oligo NN	327 Oligo NN	31	OPC-Oligo	31 OPC-Oligo
12m_rep1	AACCTCACACTCAACA-1	197	SNr Six3 Gaba	197 SNr Six3 Gaba	20	MB GABA	20 MB GABA
12m_rep1	AACCTCACAGTAGGTG-1	327	Oligo NN	327 Oligo NN	31	OPC-Oligo	31 OPC-Oligo
12m_rep1	AACCTCACATAAGCAA-1	327	Oligo NN	327 Oligo NN	31	OPC-Oligo	31 OPC-Oligo
12m_rep1	AACCTCACATCAGCAC-1	327	Oligo NN	327 Oligo NN	31	OPC-Oligo	31 OPC-Oligo
12m_rep1	AACCTCCTCATTAGCA-1	135	STN-PSTN Pitx2 Glut	135 STN-PSTN Pitx2 Glut	14	HY Glut	14 HY Glut
12m_rep1	AACCTCCTCCAGGTTG-1	135	STN-PSTN Pitx2 Glut	135 STN-PSTN Pitx2 Glut	14	HY Glut	14 HY Glut
12m_rep1	AACCTCCTCCCGTTTA-1	199	PAG-MRN-RN Foxa2 Gaba	199 PAG-MRN-RN Foxa2 Gaba	20	MB GABA	20 MB GABA
12m_rep1	AACCTCCTCCGTGACA-1	197	SNr Six3 Gaba	197 SNr Six3 Gaba	20	MB GABA	20 MB GABA
12m_rep1	AACCTCCTCGCGACAC-1	197	SNr Six3 Gaba	197 SNr Six3 Gaba	20	MB GABA	20 MB GABA
12m_rep1	AACCTCCTCTTGGACG-1	156	MB-ant-ve Dmrta2 Glut	156 MB-ant-ve Dmrta2 Glut	19	MB Glut	19 MB Glut
12m_rep1	AACCTTAAGGAACCAA-1	327	Oligo NN	327 Oligo NN	31	OPC-Oligo	31 OPC-Oligo
12m_rep1	AACCTTAAGGCGCTAC-1	326	OPC NN	326 OPC NN	31	OPC-Oligo	31 OPC-Oligo
12m_rep1	AACCTTAAGGTCGATT-1	197	SNr Six3 Gaba	197 SNr Six3 Gaba	20	MB GABA	20 MB GABA
12m_rep1	AACCTTAAGTAACAGG-1	327	Oligo NN	327 Oligo NN	31	OPC-Oligo	31 OPC-Oligo
12m_rep1	AACCTTGCAAGGTGCA-1	327	Oligo NN	327 Oligo NN	31	OPC-Oligo	31 OPC-Oligo
12m_rep1	AACCTTGCACCGGCTA-1	327	Oligo NN	327 Oligo NN	31	OPC-Oligo	31 OPC-Oligo
12m_rep1	AACCTTGCACTCAACA-1	327	Oligo NN	327 Oligo NN	31	OPC-Oligo	31 OPC-Oligo
12m_rep1	AACCTTGCATAAACCT-1	197	SNr Six3 Gaba	197 SNr Six3 Gaba	20	MB GABA	20 MB GABA
12m_rep1	AACCTTGCATCAATCG-1	327	Oligo NN	327 Oligo NN	31	OPC-Oligo	31 OPC-Oligo
12m_rep1	AACGACAAGCGGGCAA-1	197	SNr Six3 Gaba	197 SNr Six3 Gaba	20	MB GABA	20 MB GABA
12m_rep1	AACGACAAGCGGTTAT-1	195	SNr-VTA Pax5 Npas1 Gaba	195 SNr-VTA Pax5 Npas1 Gaba	20	MB GABA	20 MB GABA
12m_rep1	AACGACAAGCTCCTTA-1	327	Oligo NN	327 Oligo NN	31	OPC-Oligo	31 OPC-Oligo
12m_rep1	AACGACAAGGTCCTAG-1	197	SNr Six3 Gaba	197 SNr Six3 Gaba	20	MB GABA	20 MB GABA
12m_rep1	AACGACAAGTATTGCA-1	197	SNr Six3 Gaba	197 SNr Six3 Gaba	20	MB GABA	20 MB GABA
12m_rep1	AACGACAAGTTGTCAA-1	327	Oligo NN	327 Oligo NN	31	OPC-Oligo	31 OPC-Oligo
12m_rep1	AACGCCCAGCAACATC-1	327	Oligo NN	327 Oligo NN	31	OPC-Oligo	31 OPC-Oligo
12m_rep1	AACGCCCAGCATTATG-1	327	Oligo NN	327 Oligo NN	31	OPC-Oligo	31 OPC-Oligo
12m_rep1	AACGCCCAGCCGCAGT-1	159	IF-RL-CLI-PAG Foxa1 Glut	159 IF-RL-CLI-PAG Foxa1 Glut	19	MB Glut	19 MB Glut
12m_rep1	AACGCCCAGCCGGTAC-1	327	Oligo NN	327 Oligo NN	31	OPC-Oligo	31 OPC-Oligo
12m_rep1	AACGCCCAGGTCCACA-1	197	SNr Six3 Gaba	197 SNr Six3 Gaba	20	MB GABA	20 MB GABA
12m_rep1	AACGGTAAGAAGCTAG-1	139	PH-LHA Foxb1 Glut	139 PH-LHA Foxb1 Glut	14	HY Glut	14 HY Glut
12m_rep1	AACGGTAAGATTGAGG-1	327	Oligo NN	327 Oligo NN	31	OPC-Oligo	31 OPC-Oligo
12m_rep1	AACGGTAAGCTTCCCG-1	327	Oligo NN	327 Oligo NN	31	OPC-Oligo	31 OPC-Oligo
12m_rep1	AACGGTAAGGACCTCA-1	327	Oligo NN	327 Oligo NN	31	OPC-Oligo	31 OPC-Oligo
12m_rep1	AACGGTAAGGGTCCAC-1	195	SNr-VTA Pax5 Npas1 Gaba	195 SNr-VTA Pax5 Npas1 Gaba	20	MB GABA	20 MB GABA
12m_rep1	AACGGTAAGGTCCACA-1	327	Oligo NN	327 Oligo NN	31	OPC-Oligo	31 OPC-Oligo
12m_rep1	AACGGTAAGGTGTTAC-1	139	PH-LHA Foxb1 Glut	139 PH-LHA Foxb1 Glut	14	HY Glut	14 HY Glut
12m_rep1	AACGGTAAGTTAGACC-1	327	Oligo NN	327 Oligo NN	31	OPC-Oligo	31 OPC-Oligo
12m_rep1	AACTACTCAATAGCAA-1	327	Oligo NN	327 Oligo NN	31	OPC-Oligo	31 OPC-Oligo
12m_rep1	AACTACTCAATATACC-1	135	STN-PSTN Pitx2 Glut	135 STN-PSTN Pitx2 Glut	14	HY Glut	14 HY Glut
12m_rep1	AACTACTCAGTTGCGT-1	327	Oligo NN	327 Oligo NN	31	OPC-Oligo	31 OPC-Oligo
12m_rep1	AACTACTCATGAGCAG-1	327	Oligo NN	327 Oligo NN	31	OPC-Oligo	31 OPC-Oligo
12m_rep1	AACTACTCATGTTGCA-1	197	SNr Six3 Gaba	197 SNr Six3 Gaba	20	MB GABA	20 MB GABA
12m_rep1	AACTACTCATTAAGTC-1	334	Microglia NN	334 Microglia NN	34	Immune	34 Immune
12m_rep1	AACTACTCATTGCGAC-1	327	Oligo NN	327 Oligo NN	31	OPC-Oligo	31 OPC-Oligo
12m_rep1	AACTAGCTCACACAGT-1	327	Oligo NN	327 Oligo NN	31	OPC-Oligo	31 OPC-Oligo
12m_rep1	AACTAGCTCAGGGCCT-1	327	Oligo NN	327 Oligo NN	31	OPC-Oligo	31 OPC-Oligo
12m_rep1	AACTAGCTCCGTGACA-1	327	Oligo NN	327 Oligo NN	31	OPC-Oligo	31 OPC-Oligo
12m_rep1	AACTAGCTCCTAGTTT-1	138	PH Pitx2 Glut	138 PH Pitx2 Glut	14	HY Glut	14 HY Glut
12m_rep1	AACTAGCTCCTCATGC-1	327	Oligo NN	327 Oligo NN	31	OPC-Oligo	31 OPC-Oligo
12m_rep1	AACTCACAGGCTGTGC-1	327	Oligo NN	327 Oligo NN	31	OPC-Oligo	31 OPC-Oligo
12m_rep1	AACTGTTCAAGTAAGC-1	197	SNr Six3 Gaba	197 SNr Six3 Gaba	20	MB GABA	20 MB GABA
12m_rep1	AACTGTTCAATTAGGA-1	327	Oligo NN	327 Oligo NN	31	OPC-Oligo	31 OPC-Oligo
12m_rep1	AACTGTTCAGCACGAA-1	327	Oligo NN	327 Oligo NN	31	OPC-Oligo	31 OPC-Oligo
12m_rep1	AACTGTTCATTGTGAT-1	327	Oligo NN	327 Oligo NN	31	OPC-Oligo	31 OPC-Oligo
12m_rep1	AACTGTTCATTGTGTG-1	327	Oligo NN	327 Oligo NN	31	OPC-Oligo	31 OPC-Oligo
12m_rep1	AACTGTTCATTTAAGC-1	197	SNr Six3 Gaba	197 SNr Six3 Gaba	20	MB GABA	20 MB GABA
12m_rep1	AACTTAGTCACAGACT-1	166	MRN Pou3f1 C1ql4 Glut	166 MRN Pou3f1 C1ql4 Glut	19	MB Glut	19 MB Glut
12m_rep1	AACTTAGTCATAGACC-1	215	SNc-VTA-RAmb Foxa1 Dopa	215 SNc-VTA-RAmb Foxa1 Dopa	21	MB Dopa	21 MB Dopa
12m_rep1	AACTTAGTCATCCTCA-1	327	Oligo NN	327 Oligo NN	31	OPC-Oligo	31 OPC-Oligo
12m_rep1	AACTTAGTCCCGCAAA-1	197	SNr Six3 Gaba	197 SNr Six3 Gaba	20	MB GABA	20 MB GABA
12m_rep1	AACTTAGTCCTCACTA-1	156	MB-ant-ve Dmrta2 Glut	156 MB-ant-ve Dmrta2 Glut	19	MB Glut	19 MB Glut
12m_rep1	AAGAATCAGAACAAGT-1	135	STN-PSTN Pitx2 Glut	135 STN-PSTN Pitx2 Glut	14	HY Glut	14 HY Glut
12m_rep1	AAGAATCAGACAAACG-1	327	Oligo NN	327 Oligo NN	31	OPC-Oligo	31 OPC-Oligo
12m_rep1	AAGAATCAGCACAGGG-1	327	Oligo NN	327 Oligo NN	31	OPC-Oligo	31 OPC-Oligo
12m_rep1	AAGAATCAGGTCCACA-1	327	Oligo NN	327 Oligo NN	31	OPC-Oligo	31 OPC-Oligo
12m_rep1	AAGAATCAGTCAATCA-1	327	Oligo NN	327 Oligo NN	31	OPC-Oligo	31 OPC-Oligo
12m_rep1	AAGAATCAGTTTAACG-1	327	Oligo NN	327 Oligo NN	31	OPC-Oligo	31 OPC-Oligo
12m_rep1	AAGACAAGTAAGCACC-1	327	Oligo NN	327 Oligo NN	31	OPC-Oligo	31 OPC-Oligo
12m_rep1	AAGACAAGTAGGTGTC-1	327	Oligo NN	327 Oligo NN	31	OPC-Oligo	31 OPC-Oligo
12m_rep1	AAGACAAGTCATCAAG-1	327	Oligo NN	327 Oligo NN	31	OPC-Oligo	31 OPC-Oligo
12m_rep1	AAGACAAGTTCATCTA-1	197	SNr Six3 Gaba	197 SNr Six3 Gaba	20	MB GABA	20 MB GABA
12m_rep1	AAGACATAGCTCGCTT-1	327	Oligo NN	327 Oligo NN	31	OPC-Oligo	31 OPC-Oligo
12m_rep1	AAGACATAGGCATTAC-1	327	Oligo NN	327 Oligo NN	31	OPC-Oligo	31 OPC-Oligo
12m_rep1	AAGACATAGGTTAGAG-1	327	Oligo NN	327 Oligo NN	31	OPC-Oligo	31 OPC-Oligo
12m_rep1	AAGACATAGTAACTCA-1	16	CA1-ProS Glut	016 CA1-ProS Glut	1	IT-ET Glut	01 IT-ET Glut
12m_rep1	AAGACCAAGCTGGACC-1	327	Oligo NN	327 Oligo NN	31	OPC-Oligo	31 OPC-Oligo
12m_rep1	AAGACCAAGGCATTAC-1	16	CA1-ProS Glut	016 CA1-ProS Glut	1	IT-ET Glut	01 IT-ET Glut
12m_rep1	AAGACCAAGTGAGCGG-1	318	Astro-NT NN	318 Astro-NT NN	30	Astro-Epen	30 Astro-Epen
12m_rep1	AAGCAAGTCAATTGGC-1	327	Oligo NN	327 Oligo NN	31	OPC-Oligo	31 OPC-Oligo
12m_rep1	AAGCAAGTCCGCAAAT-1	135	STN-PSTN Pitx2 Glut	135 STN-PSTN Pitx2 Glut	14	HY Glut	14 HY Glut
12m_rep1	AAGCAAGTCCGCAACA-1	327	Oligo NN	327 Oligo NN	31	OPC-Oligo	31 OPC-Oligo
12m_rep1	AAGCAAGTCCTTCGTA-1	16	CA1-ProS Glut	016 CA1-ProS Glut	1	IT-ET Glut	01 IT-ET Glut
12m_rep1	AAGCAAGTCGCTAAAC-1	327	Oligo NN	327 Oligo NN	31	OPC-Oligo	31 OPC-Oligo
12m_rep1	AAGCAAGTCGGCCAGT-1	197	SNr Six3 Gaba	197 SNr Six3 Gaba	20	MB GABA	20 MB GABA
12m_rep1	AAGCAAGTCTTGGATA-1	101	ZI Pax6 Gaba	101 ZI Pax6 Gaba	12	HY GABA	12 HY GABA
12m_rep1	AAGCATGAGAGGCTAA-1	327	Oligo NN	327 Oligo NN	31	OPC-Oligo	31 OPC-Oligo
12m_rep1	AAGCATGAGCCTTAAA-1	327	Oligo NN	327 Oligo NN	31	OPC-Oligo	31 OPC-Oligo
12m_rep1	AAGCATGAGTAACCAC-1	327	Oligo NN	327 Oligo NN	31	OPC-Oligo	31 OPC-Oligo
12m_rep1	AAGCATGAGTTCCCAC-1	327	Oligo NN	327 Oligo NN	31	OPC-Oligo	31 OPC-Oligo
12m_rep1	AAGCCACGTACCGGAT-1	327	Oligo NN	327 Oligo NN	31	OPC-Oligo	31 OPC-Oligo
12m_rep1	AAGCCACGTCCGGTTC-1	327	Oligo NN	327 Oligo NN	31	OPC-Oligo	31 OPC-Oligo
12m_rep1	AAGCCACGTCCTTCTC-1	318	Astro-NT NN	318 Astro-NT NN	30	Astro-Epen	30 Astro-Epen
12m_rep1	AAGCCACGTGACCTGG-1	327	Oligo NN	327 Oligo NN	31	OPC-Oligo	31 OPC-Oligo
12m_rep1	AAGCCACGTTCCGCAC-1	327	Oligo NN	327 Oligo NN	31	OPC-Oligo	31 OPC-Oligo
12m_rep1	AAGCCACGTTGGTGAC-1	327	Oligo NN	327 Oligo NN	31	OPC-Oligo	31 OPC-Oligo
12m_rep1	AAGCCACGTTTGACCT-1	327	Oligo NN	327 Oligo NN	31	OPC-Oligo	31 OPC-Oligo
12m_rep1	AAGCCTCCAAGGGTTG-1	101	ZI Pax6 Gaba	101 ZI Pax6 Gaba	12	HY GABA	12 HY GABA
12m_rep1	AAGCCTCCACCAGGTT-1	327	Oligo NN	327 Oligo NN	31	OPC-Oligo	31 OPC-Oligo
12m_rep1	AAGCCTGTCACCAATA-1	215	SNc-VTA-RAmb Foxa1 Dopa	215 SNc-VTA-RAmb Foxa1 Dopa	21	MB Dopa	21 MB Dopa
12m_rep1	AAGCCTGTCAGTTCCC-1	327	Oligo NN	327 Oligo NN	31	OPC-Oligo	31 OPC-Oligo
12m_rep1	AAGCCTGTCATAACCA-1	334	Microglia NN	334 Microglia NN	34	Immune	34 Immune
12m_rep1	AAGCCTGTCCTTCTAG-1	16	CA1-ProS Glut	016 CA1-ProS Glut	1	IT-ET Glut	01 IT-ET Glut
12m_rep1	AAGCCTGTCTGTGCCT-1	197	SNr Six3 Gaba	197 SNr Six3 Gaba	20	MB GABA	20 MB GABA
12m_rep1	AAGCCTTAGCAAGGAC-1	327	Oligo NN	327 Oligo NN	31	OPC-Oligo	31 OPC-Oligo
12m_rep1	AAGCCTTAGCATGTCG-1	327	Oligo NN	327 Oligo NN	31	OPC-Oligo	31 OPC-Oligo
12m_rep1	AAGCCTTAGCATTATG-1	327	Oligo NN	327 Oligo NN	31	OPC-Oligo	31 OPC-Oligo
12m_rep1	AAGCCTTAGCGAGCGA-1	327	Oligo NN	327 Oligo NN	31	OPC-Oligo	31 OPC-Oligo
12m_rep1	AAGCCTTAGGACCTGC-1	327	Oligo NN	327 Oligo NN	31	OPC-Oligo	31 OPC-Oligo
12m_rep1	AAGCCTTAGGAGCAAC-1	318	Astro-NT NN	318 Astro-NT NN	30	Astro-Epen	30 Astro-Epen
12m_rep1	AAGCCTTAGGCGCTAC-1	327	Oligo NN	327 Oligo NN	31	OPC-Oligo	31 OPC-Oligo
12m_rep1	AAGCCTTAGGGATGAC-1	327	Oligo NN	327 Oligo NN	31	OPC-Oligo	31 OPC-Oligo
12m_rep1	AAGCGAATCACAGCGC-1	327	Oligo NN	327 Oligo NN	31	OPC-Oligo	31 OPC-Oligo
12m_rep1	AAGCGAATCATGGTTA-1	135	STN-PSTN Pitx2 Glut	135 STN-PSTN Pitx2 Glut	14	HY Glut	14 HY Glut
12m_rep1	AAGCGAGGTCATAGAT-1	318	Astro-NT NN	318 Astro-NT NN	30	Astro-Epen	30 Astro-Epen
12m_rep1	AAGCGAGGTTAACAGT-1	156	MB-ant-ve Dmrta2 Glut	156 MB-ant-ve Dmrta2 Glut	19	MB Glut	19 MB Glut
12m_rep1	AAGCGAGGTTAAGGCC-1	16	CA1-ProS Glut	016 CA1-ProS Glut	1	IT-ET Glut	01 IT-ET Glut
12m_rep1	AAGCGAGGTTACTTGC-1	327	Oligo NN	327 Oligo NN	31	OPC-Oligo	31 OPC-Oligo
12m_rep1	AAGCGAGGTTGGTTAG-1	197	SNr Six3 Gaba	197 SNr Six3 Gaba	20	MB GABA	20 MB GABA
12m_rep1	AAGCGCTGTAAAGCGG-1	327	Oligo NN	327 Oligo NN	31	OPC-Oligo	31 OPC-Oligo
12m_rep1	AAGCGCTGTACCCACC-1	327	Oligo NN	327 Oligo NN	31	OPC-Oligo	31 OPC-Oligo
12m_rep1	AAGCGCTGTCATCCTG-1	327	Oligo NN	327 Oligo NN	31	OPC-Oligo	31 OPC-Oligo
12m_rep1	AAGCGCTGTCGCAAAC-1	138	PH Pitx2 Glut	138 PH Pitx2 Glut	14	HY Glut	14 HY Glut
12m_rep1	AAGCGGGTCTAGCTAA-1	139	PH-LHA Foxb1 Glut	139 PH-LHA Foxb1 Glut	14	HY Glut	14 HY Glut
12m_rep1	AAGCGTTTCAATTGGC-1	327	Oligo NN	327 Oligo NN	31	OPC-Oligo	31 OPC-Oligo
12m_rep1	AAGCGTTTCCAAGTGT-1	141	PH-SUM Foxa1 Glut	141 PH-SUM Foxa1 Glut	14	HY Glut	14 HY Glut
12m_rep1	AAGCGTTTCCGCAACA-1	166	MRN Pou3f1 C1ql4 Glut	166 MRN Pou3f1 C1ql4 Glut	19	MB Glut	19 MB Glut
12m_rep1	AAGCGTTTCCTCAGCT-1	327	Oligo NN	327 Oligo NN	31	OPC-Oligo	31 OPC-Oligo
12m_rep1	AAGCGTTTCCTCCCTC-1	327	Oligo NN	327 Oligo NN	31	OPC-Oligo	31 OPC-Oligo
12m_rep1	AAGCGTTTCTAACTGA-1	327	Oligo NN	327 Oligo NN	31	OPC-Oligo	31 OPC-Oligo
12m_rep1	AAGCGTTTCTACCTAT-1	197	SNr Six3 Gaba	197 SNr Six3 Gaba	20	MB GABA	20 MB GABA
12m_rep1	AAGCGTTTCTGCAAGT-1	16	CA1-ProS Glut	016 CA1-ProS Glut	1	IT-ET Glut	01 IT-ET Glut
12m_rep1	AAGCTAGAGCGATAAG-1	197	SNr Six3 Gaba	197 SNr Six3 Gaba	20	MB GABA	20 MB GABA
12m_rep1	AAGCTAGAGCTGTCAG-1	197	SNr Six3 Gaba	197 SNr Six3 Gaba	20	MB GABA	20 MB GABA
12m_rep1	AAGCTAGAGTTATGGC-1	327	Oligo NN	327 Oligo NN	31	OPC-Oligo	31 OPC-Oligo
12m_rep1	AAGCTATGTAATCCCT-1	16	CA1-ProS Glut	016 CA1-ProS Glut	1	IT-ET Glut	01 IT-ET Glut
12m_rep1	AAGCTATGTACCAGGT-1	101	ZI Pax6 Gaba	101 ZI Pax6 Gaba	12	HY GABA	12 HY GABA
12m_rep1	AAGCTATGTCATTACC-1	16	CA1-ProS Glut	016 CA1-ProS Glut	1	IT-ET Glut	01 IT-ET Glut
12m_rep1	AAGCTATGTGACATGC-1	327	Oligo NN	327 Oligo NN	31	OPC-Oligo	31 OPC-Oligo
12m_rep1	AAGCTATGTGCAATAT-1	327	Oligo NN	327 Oligo NN	31	OPC-Oligo	31 OPC-Oligo
12m_rep1	AAGCTATGTTAGGTTG-1	330	VLMC NN	330 VLMC NN	33	Vascular	33 Vascular
12m_rep1	AAGCTATGTTCCGGCT-1	327	Oligo NN	327 Oligo NN	31	OPC-Oligo	31 OPC-Oligo
12m_rep1	AAGCTCCCACACAATT-1	327	Oligo NN	327 Oligo NN	31	OPC-Oligo	31 OPC-Oligo
12m_rep1	AAGCTCCCAGGCTTCG-1	16	CA1-ProS Glut	016 CA1-ProS Glut	1	IT-ET Glut	01 IT-ET Glut
12m_rep1	AAGCTCCCAGTCTAAT-1	327	Oligo NN	327 Oligo NN	31	OPC-Oligo	31 OPC-Oligo
12m_rep1	AAGCTCCCATGAGTTT-1	327	Oligo NN	327 Oligo NN	31	OPC-Oligo	31 OPC-Oligo
12m_rep1	AAGCTTGGTACGTTTC-1	195	SNr-VTA Pax5 Npas1 Gaba	195 SNr-VTA Pax5 Npas1 Gaba	20	MB GABA	20 MB GABA
12m_rep1	AAGCTTGGTCTAACCT-1	327	Oligo NN	327 Oligo NN	31	OPC-Oligo	31 OPC-Oligo
12m_rep1	AAGCTTGGTGCGCAAT-1	327	Oligo NN	327 Oligo NN	31	OPC-Oligo	31 OPC-Oligo
12m_rep1	AAGCTTGGTTACCTGT-1	327	Oligo NN	327 Oligo NN	31	OPC-Oligo	31 OPC-Oligo
12m_rep1	AAGCTTGGTTTATTCG-1	327	Oligo NN	327 Oligo NN	31	OPC-Oligo	31 OPC-Oligo
12m_rep1	AAGGAAGCAGGATTAA-1	327	Oligo NN	327 Oligo NN	31	OPC-Oligo	31 OPC-Oligo
12m_rep1	AAGGATCCACACAATT-1	16	CA1-ProS Glut	016 CA1-ProS Glut	1	IT-ET Glut	01 IT-ET Glut
12m_rep1	AAGGATCCACCTACGG-1	327	Oligo NN	327 Oligo NN	31	OPC-Oligo	31 OPC-Oligo
12m_rep1	AAGGATCCAGGATGGC-1	327	Oligo NN	327 Oligo NN	31	OPC-Oligo	31 OPC-Oligo
12m_rep1	AAGGATCCAGGCTAGA-1	318	Astro-NT NN	318 Astro-NT NN	30	Astro-Epen	30 Astro-Epen
12m_rep1	AAGGATCCATTCCTCG-1	197	SNr Six3 Gaba	197 SNr Six3 Gaba	20	MB GABA	20 MB GABA
12m_rep1	AAGGATGTCATTACGA-1	16	CA1-ProS Glut	016 CA1-ProS Glut	1	IT-ET Glut	01 IT-ET Glut
12m_rep1	AAGGATGTCATTGCAA-1	135	STN-PSTN Pitx2 Glut	135 STN-PSTN Pitx2 Glut	14	HY Glut	14 HY Glut
12m_rep1	AAGGATGTCTTACTCG-1	197	SNr Six3 Gaba	197 SNr Six3 Gaba	20	MB GABA	20 MB GABA
12m_rep1	AAGGATGTCTTAGTCT-1	16	CA1-ProS Glut	016 CA1-ProS Glut	1	IT-ET Glut	01 IT-ET Glut
12m_rep1	AAGGATTAGAGGCTAA-1	327	Oligo NN	327 Oligo NN	31	OPC-Oligo	31 OPC-Oligo
12m_rep1	AAGGATTAGCGAAGTA-1	101	ZI Pax6 Gaba	101 ZI Pax6 Gaba	12	HY GABA	12 HY GABA
12m_rep1	AAGGATTAGTGCACGC-1	327	Oligo NN	327 Oligo NN	31	OPC-Oligo	31 OPC-Oligo
12m_rep1	AAGGCCCTCCCGTTGT-1	327	Oligo NN	327 Oligo NN	31	OPC-Oligo	31 OPC-Oligo
12m_rep1	AAGGCCCTCCTCAGCT-1	327	Oligo NN	327 Oligo NN	31	OPC-Oligo	31 OPC-Oligo
12m_rep1	AAGGCCCTCTAAGTGC-1	326	OPC NN	326 OPC NN	31	OPC-Oligo	31 OPC-Oligo
12m_rep1	AAGGTATAGATGGAGC-1	327	Oligo NN	327 Oligo NN	31	OPC-Oligo	31 OPC-Oligo
12m_rep1	AAGGTATAGCAGGCCT-1	141	PH-SUM Foxa1 Glut	141 PH-SUM Foxa1 Glut	14	HY Glut	14 HY Glut
12m_rep1	AAGGTATAGGATCCGC-1	327	Oligo NN	327 Oligo NN	31	OPC-Oligo	31 OPC-Oligo
12m_rep1	AAGGTATAGTTGGGCC-1	166	MRN Pou3f1 C1ql4 Glut	166 MRN Pou3f1 C1ql4 Glut	19	MB Glut	19 MB Glut
12m_rep1	AAGGTCAAGAACAAGT-1	327	Oligo NN	327 Oligo NN	31	OPC-Oligo	31 OPC-Oligo
12m_rep1	AAGGTCAAGGCATGTT-1	327	Oligo NN	327 Oligo NN	31	OPC-Oligo	31 OPC-Oligo
12m_rep1	AAGGTCAAGGGCCACT-1	327	Oligo NN	327 Oligo NN	31	OPC-Oligo	31 OPC-Oligo
12m_rep1	AAGGTCAAGTTCCTGC-1	135	STN-PSTN Pitx2 Glut	135 STN-PSTN Pitx2 Glut	14	HY Glut	14 HY Glut
12m_rep1	AAGGTGCAGCAAGACA-1	16	CA1-ProS Glut	016 CA1-ProS Glut	1	IT-ET Glut	01 IT-ET Glut
12m_rep1	AAGGTGCAGCCTCTCG-1	318	Astro-NT NN	318 Astro-NT NN	30	Astro-Epen	30 Astro-Epen
12m_rep1	AAGGTGCAGGAACCGG-1	327	Oligo NN	327 Oligo NN	31	OPC-Oligo	31 OPC-Oligo
12m_rep1	AAGGTGCAGTTTGTCT-1	139	PH-LHA Foxb1 Glut	139 PH-LHA Foxb1 Glut	14	HY Glut	14 HY Glut
12m_rep1	AAGTAGCCAACTCGCG-1	135	STN-PSTN Pitx2 Glut	135 STN-PSTN Pitx2 Glut	14	HY Glut	14 HY Glut
12m_rep1	AAGTAGCCAAGGGTTG-1	101	ZI Pax6 Gaba	101 ZI Pax6 Gaba	12	HY GABA	12 HY GABA
12m_rep1	AAGTAGCCACGTGCTG-1	327	Oligo NN	327 Oligo NN	31	OPC-Oligo	31 OPC-Oligo
12m_rep1	AAGTAGCCACTTCACT-1	327	Oligo NN	327 Oligo NN	31	OPC-Oligo	31 OPC-Oligo
12m_rep1	AAGTAGCCAGCTTAGC-1	195	SNr-VTA Pax5 Npas1 Gaba	195 SNr-VTA Pax5 Npas1 Gaba	20	MB GABA	20 MB GABA
12m_rep1	AAGTAGCCAGGCCATT-1	197	SNr Six3 Gaba	197 SNr Six3 Gaba	20	MB GABA	20 MB GABA
12m_rep1	AAGTAGCCAGTCTAGC-1	327	Oligo NN	327 Oligo NN	31	OPC-Oligo	31 OPC-Oligo
12m_rep1	AAGTAGCCATAATGAG-1	135	STN-PSTN Pitx2 Glut	135 STN-PSTN Pitx2 Glut	14	HY Glut	14 HY Glut
12m_rep1	AAGTAGCCATACCCGG-1	16	CA1-ProS Glut	016 CA1-ProS Glut	1	IT-ET Glut	01 IT-ET Glut
12m_rep1	AAGTAGCCATAGCTTG-1	197	SNr Six3 Gaba	197 SNr Six3 Gaba	20	MB GABA	20 MB GABA
12m_rep1	AAGTCTATCAGCAAAG-1	327	Oligo NN	327 Oligo NN	31	OPC-Oligo	31 OPC-Oligo
12m_rep1	AAGTCTATCAGGGCCT-1	327	Oligo NN	327 Oligo NN	31	OPC-Oligo	31 OPC-Oligo
12m_rep1	AAGTCTATCATTACTC-1	138	PH Pitx2 Glut	138 PH Pitx2 Glut	14	HY Glut	14 HY Glut
12m_rep1	AAGTCTATCCACCTGT-1	138	PH Pitx2 Glut	138 PH Pitx2 Glut	14	HY Glut	14 HY Glut
12m_rep1	AAGTCTATCCCTCGCA-1	135	STN-PSTN Pitx2 Glut	135 STN-PSTN Pitx2 Glut	14	HY Glut	14 HY Glut
12m_rep1	AAGTCTATCGGCCAGT-1	318	Astro-NT NN	318 Astro-NT NN	30	Astro-Epen	30 Astro-Epen
12m_rep1	AAGTCTATCTAATTGG-1	141	PH-SUM Foxa1 Glut	141 PH-SUM Foxa1 Glut	14	HY Glut	14 HY Glut
12m_rep1	AAGTCTATCTATTGTC-1	318	Astro-NT NN	318 Astro-NT NN	30	Astro-Epen	30 Astro-Epen
12m_rep1	AAGTGAAGTTGCGCGA-1	197	SNr Six3 Gaba	197 SNr Six3 Gaba	20	MB GABA	20 MB GABA
12m_rep1	AAGTGAAGTTTCCGGC-1	16	CA1-ProS Glut	016 CA1-ProS Glut	1	IT-ET Glut	01 IT-ET Glut
12m_rep1	AAGTGCAAGATGGACA-1	197	SNr Six3 Gaba	197 SNr Six3 Gaba	20	MB GABA	20 MB GABA
12m_rep1	AAGTGCAAGCGGGCAA-1	135	STN-PSTN Pitx2 Glut	135 STN-PSTN Pitx2 Glut	14	HY Glut	14 HY Glut
12m_rep1	AAGTGCAAGCTAATCA-1	197	SNr Six3 Gaba	197 SNr Six3 Gaba	20	MB GABA	20 MB GABA
12m_rep1	AAGTTACGTGTGAGAG-1	197	SNr Six3 Gaba	197 SNr Six3 Gaba	20	MB GABA	20 MB GABA
12m_rep1	AAGTTACGTTCCGCAC-1	327	Oligo NN	327 Oligo NN	31	OPC-Oligo	31 OPC-Oligo
12m_rep1	AAGTTACGTTTGTGGA-1	327	Oligo NN	327 Oligo NN	31	OPC-Oligo	31 OPC-Oligo
12m_rep1	AAGTTAGCAACTGGGA-1	165	PAG-MRN Pou3f1 Glut	165 PAG-MRN Pou3f1 Glut	19	MB Glut	19 MB Glut
12m_rep1	AAGTTAGCAGCAACCT-1	327	Oligo NN	327 Oligo NN	31	OPC-Oligo	31 OPC-Oligo
12m_rep1	AAGTTAGCATAGACCC-1	327	Oligo NN	327 Oligo NN	31	OPC-Oligo	31 OPC-Oligo
12m_rep1	AAGTTTGTCATTTGTC-1	327	Oligo NN	327 Oligo NN	31	OPC-Oligo	31 OPC-Oligo
12m_rep1	AAGTTTGTCGTAACGT-1	165	PAG-MRN Pou3f1 Glut	165 PAG-MRN Pou3f1 Glut	19	MB Glut	19 MB Glut
12m_rep1	AAGTTTGTCTAAGGAG-1	135	STN-PSTN Pitx2 Glut	135 STN-PSTN Pitx2 Glut	14	HY Glut	14 HY Glut
12m_rep1	AATAACCGTCTAACAG-1	327	Oligo NN	327 Oligo NN	31	OPC-Oligo	31 OPC-Oligo
12m_rep1	AATAACCGTGATTACG-1	327	Oligo NN	327 Oligo NN	31	OPC-Oligo	31 OPC-Oligo
12m_rep1	AATAACCGTGCAATGC-1	135	STN-PSTN Pitx2 Glut	135 STN-PSTN Pitx2 Glut	14	HY Glut	14 HY Glut
12m_rep1	AATAACCGTGCTCCGT-1	327	Oligo NN	327 Oligo NN	31	OPC-Oligo	31 OPC-Oligo
12m_rep1	AATAACCGTTAGAGGG-1	334	Microglia NN	334 Microglia NN	34	Immune	34 Immune
12m_rep1	AATAACCGTTAGGCGT-1	327	Oligo NN	327 Oligo NN	31	OPC-Oligo	31 OPC-Oligo
12m_rep1	AATAACCGTTTATCGC-1	327	Oligo NN	327 Oligo NN	31	OPC-Oligo	31 OPC-Oligo
12m_rep1	AATACCGGTGCGCAAT-1	16	CA1-ProS Glut	016 CA1-ProS Glut	1	IT-ET Glut	01 IT-ET Glut
12m_rep1	AATACCGGTGGACCTG-1	197	SNr Six3 Gaba	197 SNr Six3 Gaba	20	MB GABA	20 MB GABA
12m_rep1	AATACCGGTGTTGTGA-1	138	PH Pitx2 Glut	138 PH Pitx2 Glut	14	HY Glut	14 HY Glut
12m_rep1	AATACCGGTTGGTTAG-1	327	Oligo NN	327 Oligo NN	31	OPC-Oligo	31 OPC-Oligo
12m_rep1	AATACCGGTTTGCGAA-1	327	Oligo NN	327 Oligo NN	31	OPC-Oligo	31 OPC-Oligo
12m_rep1	AATAGAGGTTAGGTGC-1	166	MRN Pou3f1 C1ql4 Glut	166 MRN Pou3f1 C1ql4 Glut	19	MB Glut	19 MB Glut
12m_rep1	AATAGCTGTCAATAGT-1	197	SNr Six3 Gaba	197 SNr Six3 Gaba	20	MB GABA	20 MB GABA
12m_rep1	AATAGCTGTCCTAGTT-1	101	ZI Pax6 Gaba	101 ZI Pax6 Gaba	12	HY GABA	12 HY GABA
12m_rep1	AATAGCTGTGGCTTCC-1	327	Oligo NN	327 Oligo NN	31	OPC-Oligo	31 OPC-Oligo
12m_rep1	AATAGCTGTTCCGGCT-1	327	Oligo NN	327 Oligo NN	31	OPC-Oligo	31 OPC-Oligo
12m_rep1	AATATCCCACTAAATC-1	327	Oligo NN	327 Oligo NN	31	OPC-Oligo	31 OPC-Oligo
12m_rep1	AATATCCCAGCAGGTA-1	327	Oligo NN	327 Oligo NN	31	OPC-Oligo	31 OPC-Oligo
12m_rep1	AATATCCCAGGCCAAA-1	327	Oligo NN	327 Oligo NN	31	OPC-Oligo	31 OPC-Oligo
12m_rep1	AATATCCCAGGCTGTT-1	327	Oligo NN	327 Oligo NN	31	OPC-Oligo	31 OPC-Oligo
12m_rep1	AATATCCCAGTAAGTA-1	327	Oligo NN	327 Oligo NN	31	OPC-Oligo	31 OPC-Oligo
12m_rep1	AATCAGGAGACAGGCG-1	16	CA1-ProS Glut	016 CA1-ProS Glut	1	IT-ET Glut	01 IT-ET Glut
12m_rep1	AATCAGGAGGAACACA-1	327	Oligo NN	327 Oligo NN	31	OPC-Oligo	31 OPC-Oligo
12m_rep1	AATCAGGAGGACAACA-1	138	PH Pitx2 Glut	138 PH Pitx2 Glut	14	HY Glut	14 HY Glut
12m_rep1	AATCAGGAGGAGGTTA-1	135	STN-PSTN Pitx2 Glut	135 STN-PSTN Pitx2 Glut	14	HY Glut	14 HY Glut
12m_rep1	AATCAGGAGGTCCTAG-1	197	SNr Six3 Gaba	197 SNr Six3 Gaba	20	MB GABA	20 MB GABA
12m_rep1	AATCAGGAGTGCACGC-1	197	SNr Six3 Gaba	197 SNr Six3 Gaba	20	MB GABA	20 MB GABA
12m_rep1	AATCATCCAAGGTAAC-1	318	Astro-NT NN	318 Astro-NT NN	30	Astro-Epen	30 Astro-Epen
12m_rep1	AATCATCCAGCACGAA-1	334	Microglia NN	334 Microglia NN	34	Immune	34 Immune
12m_rep1	AATCATGTCACTCGCT-1	327	Oligo NN	327 Oligo NN	31	OPC-Oligo	31 OPC-Oligo
12m_rep1	AATCATGTCAGCATTA-1	327	Oligo NN	327 Oligo NN	31	OPC-Oligo	31 OPC-Oligo
12m_rep1	AATCATGTCGGTCATG-1	16	CA1-ProS Glut	016 CA1-ProS Glut	1	IT-ET Glut	01 IT-ET Glut
12m_rep1	AATCCATCACATAACT-1	16	CA1-ProS Glut	016 CA1-ProS Glut	1	IT-ET Glut	01 IT-ET Glut
12m_rep1	AATCCATCAGAAATTG-1	327	Oligo NN	327 Oligo NN	31	OPC-Oligo	31 OPC-Oligo
12m_rep1	AATCCCTGTCTTGCAT-1	327	Oligo NN	327 Oligo NN	31	OPC-Oligo	31 OPC-Oligo
12m_rep1	AATCCCTGTGGATTAT-1	93	RT-ZI Gnb3 Gaba	093 RT-ZI Gnb3 Gaba	12	HY GABA	12 HY GABA
12m_rep1	AATCCCTGTGTTTGCT-1	327	Oligo NN	327 Oligo NN	31	OPC-Oligo	31 OPC-Oligo
12m_rep1	AATCCCTGTTAGGTGC-1	166	MRN Pou3f1 C1ql4 Glut	166 MRN Pou3f1 C1ql4 Glut	19	MB Glut	19 MB Glut
12m_rep1	AATCCGTAGACAAAGT-1	327	Oligo NN	327 Oligo NN	31	OPC-Oligo	31 OPC-Oligo
12m_rep1	AATCCGTAGATTGAGG-1	334	Microglia NN	334 Microglia NN	34	Immune	34 Immune
12m_rep1	AATCCGTAGCGCATTG-1	327	Oligo NN	327 Oligo NN	31	OPC-Oligo	31 OPC-Oligo
12m_rep1	AATCCGTAGTCAGTAC-1	197	SNr Six3 Gaba	197 SNr Six3 Gaba	20	MB GABA	20 MB GABA
12m_rep1	AATCCGTAGTTAGCTA-1	327	Oligo NN	327 Oligo NN	31	OPC-Oligo	31 OPC-Oligo
12m_rep1	AATCCTAAGACAACGA-1	334	Microglia NN	334 Microglia NN	34	Immune	34 Immune
12m_rep1	AATCCTAAGCATTATG-1	327	Oligo NN	327 Oligo NN	31	OPC-Oligo	31 OPC-Oligo
12m_rep1	AATCCTAAGCCGCTAA-1	327	Oligo NN	327 Oligo NN	31	OPC-Oligo	31 OPC-Oligo
12m_rep1	AATCCTAAGGTAAGGC-1	327	Oligo NN	327 Oligo NN	31	OPC-Oligo	31 OPC-Oligo
12m_rep1	AATCCTAAGTAAACCC-1	327	Oligo NN	327 Oligo NN	31	OPC-Oligo	31 OPC-Oligo
12m_rep1	AATCCTAAGTAACCCG-1	334	Microglia NN	334 Microglia NN	34	Immune	34 Immune
12m_rep1	AATCCTAAGTCACTAA-1	135	STN-PSTN Pitx2 Glut	135 STN-PSTN Pitx2 Glut	14	HY Glut	14 HY Glut
12m_rep1	AATCCTAAGTTATCCT-1	327	Oligo NN	327 Oligo NN	31	OPC-Oligo	31 OPC-Oligo
12m_rep1	AATCGCCCAACTGGCT-1	327	Oligo NN	327 Oligo NN	31	OPC-Oligo	31 OPC-Oligo
12m_rep1	AATCGCCCAATTAGGA-1	197	SNr Six3 Gaba	197 SNr Six3 Gaba	20	MB GABA	20 MB GABA
12m_rep1	AATCGCCCACATTGCA-1	327	Oligo NN	327 Oligo NN	31	OPC-Oligo	31 OPC-Oligo
12m_rep1	AATCGCCCAGGATTAA-1	101	ZI Pax6 Gaba	101 ZI Pax6 Gaba	12	HY GABA	12 HY GABA
12m_rep1	AATCTCAAGGAACGGT-1	197	SNr Six3 Gaba	197 SNr Six3 Gaba	20	MB GABA	20 MB GABA
12m_rep1	AATCTCAAGGCCATCA-1	139	PH-LHA Foxb1 Glut	139 PH-LHA Foxb1 Glut	14	HY Glut	14 HY Glut
12m_rep1	AATCTCAAGGTCAAAG-1	327	Oligo NN	327 Oligo NN	31	OPC-Oligo	31 OPC-Oligo
12m_rep1	AATCTCAAGTATCGCG-1	93	RT-ZI Gnb3 Gaba	093 RT-ZI Gnb3 Gaba	12	HY GABA	12 HY GABA
12m_rep1	AATCTCAAGTTCCCAC-1	327	Oligo NN	327 Oligo NN	31	OPC-Oligo	31 OPC-Oligo
12m_rep1	AATCTTGAGCAGCTCA-1	327	Oligo NN	327 Oligo NN	31	OPC-Oligo	31 OPC-Oligo
12m_rep1	AATCTTGAGTTTGCGG-1	327	Oligo NN	327 Oligo NN	31	OPC-Oligo	31 OPC-Oligo
12m_rep1	AATGAAGGTCGCAATA-1	197	SNr Six3 Gaba	197 SNr Six3 Gaba	20	MB GABA	20 MB GABA
12m_rep1	AATGAAGGTGATGGCT-1	166	MRN Pou3f1 C1ql4 Glut	166 MRN Pou3f1 C1ql4 Glut	19	MB Glut	19 MB Glut
12m_rep1	AATGAAGGTGCAACTA-1	197	SNr Six3 Gaba	197 SNr Six3 Gaba	20	MB GABA	20 MB GABA
12m_rep1	AATGAAGGTGGTGAGA-1	327	Oligo NN	327 Oligo NN	31	OPC-Oligo	31 OPC-Oligo
12m_rep1	AATGAAGGTTACTAGG-1	197	SNr Six3 Gaba	197 SNr Six3 Gaba	20	MB GABA	20 MB GABA
12m_rep1	AATGAAGGTTGCAATG-1	332	SMC NN	332 SMC NN	33	Vascular	33 Vascular
12m_rep1	AATGAAGGTTTGTCTA-1	327	Oligo NN	327 Oligo NN	31	OPC-Oligo	31 OPC-Oligo
12m_rep1	AATGCAACAATTTAGC-1	327	Oligo NN	327 Oligo NN	31	OPC-Oligo	31 OPC-Oligo
12m_rep1	AATGCAACACCGTTCC-1	327	Oligo NN	327 Oligo NN	31	OPC-Oligo	31 OPC-Oligo
12m_rep1	AATGCAACAGGATGGC-1	195	SNr-VTA Pax5 Npas1 Gaba	195 SNr-VTA Pax5 Npas1 Gaba	20	MB GABA	20 MB GABA
12m_rep1	AATGCAACAGTAAGTA-1	197	SNr Six3 Gaba	197 SNr Six3 Gaba	20	MB GABA	20 MB GABA
12m_rep1	AATGCAACAGTTAGCC-1	327	Oligo NN	327 Oligo NN	31	OPC-Oligo	31 OPC-Oligo
12m_rep1	AATGCAACATAAGCAA-1	197	SNr Six3 Gaba	197 SNr Six3 Gaba	20	MB GABA	20 MB GABA
12m_rep1	AATGCAACATCAATCG-1	141	PH-SUM Foxa1 Glut	141 PH-SUM Foxa1 Glut	14	HY Glut	14 HY Glut
12m_rep1	AATGCAACATGCTTAG-1	327	Oligo NN	327 Oligo NN	31	OPC-Oligo	31 OPC-Oligo
12m_rep1	AATGCATGTAAATTGC-1	135	STN-PSTN Pitx2 Glut	135 STN-PSTN Pitx2 Glut	14	HY Glut	14 HY Glut
12m_rep1	AATGCATGTCAGGAAG-1	327	Oligo NN	327 Oligo NN	31	OPC-Oligo	31 OPC-Oligo
12m_rep1	AATGCATGTCATTAGG-1	327	Oligo NN	327 Oligo NN	31	OPC-Oligo	31 OPC-Oligo
12m_rep1	AATGCATGTTACTTGC-1	334	Microglia NN	334 Microglia NN	34	Immune	34 Immune
12m_rep1	AATGCATGTTGACTTC-1	327	Oligo NN	327 Oligo NN	31	OPC-Oligo	31 OPC-Oligo
12m_rep1	AATGCGCGTAATCGTG-1	327	Oligo NN	327 Oligo NN	31	OPC-Oligo	31 OPC-Oligo
12m_rep1	AATGCGCGTTGAGGTC-1	327	Oligo NN	327 Oligo NN	31	OPC-Oligo	31 OPC-Oligo
12m_rep1	AATGGCGCAAGCCAGA-1	327	Oligo NN	327 Oligo NN	31	OPC-Oligo	31 OPC-Oligo
12m_rep1	AATGGCGCACATTGCA-1	156	MB-ant-ve Dmrta2 Glut	156 MB-ant-ve Dmrta2 Glut	19	MB Glut	19 MB Glut
12m_rep1	AATGTCATCCACCTTA-1	166	MRN Pou3f1 C1ql4 Glut	166 MRN Pou3f1 C1ql4 Glut	19	MB Glut	19 MB Glut
12m_rep1	AATGTCATCCGCTAGA-1	327	Oligo NN	327 Oligo NN	31	OPC-Oligo	31 OPC-Oligo
12m_rep1	AATGTCATCGGTTAGT-1	334	Microglia NN	334 Microglia NN	34	Immune	34 Immune
12m_rep1	AATGTCATCTTGCTAT-1	327	Oligo NN	327 Oligo NN	31	OPC-Oligo	31 OPC-Oligo
12m_rep1	AATGTCCAGCGTGCGT-1	318	Astro-NT NN	318 Astro-NT NN	30	Astro-Epen	30 Astro-Epen
12m_rep1	AATGTCCAGTAACTCA-1	16	CA1-ProS Glut	016 CA1-ProS Glut	1	IT-ET Glut	01 IT-ET Glut
12m_rep1	AATTACCCACCAACCG-1	327	Oligo NN	327 Oligo NN	31	OPC-Oligo	31 OPC-Oligo
12m_rep1	AATTAGCGTAATTAGC-1	327	Oligo NN	327 Oligo NN	31	OPC-Oligo	31 OPC-Oligo
12m_rep1	AATTAGGCAACAGGAT-1	215	SNc-VTA-RAmb Foxa1 Dopa	215 SNc-VTA-RAmb Foxa1 Dopa	21	MB Dopa	21 MB Dopa
12m_rep1	AATTAGGCATAAGGAC-1	327	Oligo NN	327 Oligo NN	31	OPC-Oligo	31 OPC-Oligo
12m_rep1	AATTAGGCATTGTTGG-1	197	SNr Six3 Gaba	197 SNr Six3 Gaba	20	MB GABA	20 MB GABA
12m_rep1	AATTCGTCAACCGCCA-1	135	STN-PSTN Pitx2 Glut	135 STN-PSTN Pitx2 Glut	14	HY Glut	14 HY Glut
12m_rep1	AATTCGTCAACCTGGT-1	327	Oligo NN	327 Oligo NN	31	OPC-Oligo	31 OPC-Oligo
12m_rep1	AATTCGTCAATTTAGC-1	327	Oligo NN	327 Oligo NN	31	OPC-Oligo	31 OPC-Oligo
12m_rep1	AATTCGTCACAATTAC-1	327	Oligo NN	327 Oligo NN	31	OPC-Oligo	31 OPC-Oligo
12m_rep1	AATTCGTCAGAAATGC-1	327	Oligo NN	327 Oligo NN	31	OPC-Oligo	31 OPC-Oligo
12m_rep1	AATTGACGTACCTTAC-1	327	Oligo NN	327 Oligo NN	31	OPC-Oligo	31 OPC-Oligo
12m_rep1	AATTGACGTAGCTAGC-1	16	CA1-ProS Glut	016 CA1-ProS Glut	1	IT-ET Glut	01 IT-ET Glut
12m_rep1	AATTGCCAGCACAGGG-1	327	Oligo NN	327 Oligo NN	31	OPC-Oligo	31 OPC-Oligo
12m_rep1	AATTGCCAGCTGGCTA-1	327	Oligo NN	327 Oligo NN	31	OPC-Oligo	31 OPC-Oligo
12m_rep1	AATTGCCAGGGATGCG-1	327	Oligo NN	327 Oligo NN	31	OPC-Oligo	31 OPC-Oligo
12m_rep1	AATTGCCAGTTGGCCA-1	327	Oligo NN	327 Oligo NN	31	OPC-Oligo	31 OPC-Oligo
12m_rep1	AATTGCTCAAATGCCC-1	327	Oligo NN	327 Oligo NN	31	OPC-Oligo	31 OPC-Oligo
12m_rep1	AATTGCTCAGAGGCTA-1	327	Oligo NN	327 Oligo NN	31	OPC-Oligo	31 OPC-Oligo
12m_rep1	AATTGCTCAGCTACGT-1	327	Oligo NN	327 Oligo NN	31	OPC-Oligo	31 OPC-Oligo
12m_rep1	AATTGCTCAGTCTATG-1	318	Astro-NT NN	318 Astro-NT NN	30	Astro-Epen	30 Astro-Epen
12m_rep1	AATTGGACAAGGATTA-1	135	STN-PSTN Pitx2 Glut	135 STN-PSTN Pitx2 Glut	14	HY Glut	14 HY Glut
12m_rep1	AATTGGACACCGGCTA-1	327	Oligo NN	327 Oligo NN	31	OPC-Oligo	31 OPC-Oligo
12m_rep1	AATTGGACAGCAACCT-1	16	CA1-ProS Glut	016 CA1-ProS Glut	1	IT-ET Glut	01 IT-ET Glut
12m_rep1	AATTGGGAGGTGAAGC-1	93	RT-ZI Gnb3 Gaba	093 RT-ZI Gnb3 Gaba	12	HY GABA	12 HY GABA
12m_rep1	AATTGGGAGTAAACCC-1	197	SNr Six3 Gaba	197 SNr Six3 Gaba	20	MB GABA	20 MB GABA
12m_rep1	AATTGGGAGTCACCTC-1	327	Oligo NN	327 Oligo NN	31	OPC-Oligo	31 OPC-Oligo
12m_rep1	AATTGTGTCCAACTGG-1	327	Oligo NN	327 Oligo NN	31	OPC-Oligo	31 OPC-Oligo
12m_rep1	AATTGTGTCCTTGAGG-1	327	Oligo NN	327 Oligo NN	31	OPC-Oligo	31 OPC-Oligo
12m_rep1	AATTGTGTCTTAGTCT-1	327	Oligo NN	327 Oligo NN	31	OPC-Oligo	31 OPC-Oligo
12m_rep1	AATTTCCTCATCGTTT-1	16	CA1-ProS Glut	016 CA1-ProS Glut	1	IT-ET Glut	01 IT-ET Glut
12m_rep1	AATTTCCTCATGGTTA-1	138	PH Pitx2 Glut	138 PH Pitx2 Glut	14	HY Glut	14 HY Glut
12m_rep1	AATTTCCTCATGTGGT-1	327	Oligo NN	327 Oligo NN	31	OPC-Oligo	31 OPC-Oligo
12m_rep1	AATTTCCTCCCGTTTA-1	327	Oligo NN	327 Oligo NN	31	OPC-Oligo	31 OPC-Oligo
12m_rep1	AATTTCCTCCTCACTA-1	334	Microglia NN	334 Microglia NN	34	Immune	34 Immune
12m_rep1	AATTTCCTCGCTATGG-1	101	ZI Pax6 Gaba	101 ZI Pax6 Gaba	12	HY GABA	12 HY GABA
12m_rep1	AATTTCCTCGTTACAA-1	327	Oligo NN	327 Oligo NN	31	OPC-Oligo	31 OPC-Oligo
12m_rep1	AATTTCCTCGTTCACC-1	135	STN-PSTN Pitx2 Glut	135 STN-PSTN Pitx2 Glut	14	HY Glut	14 HY Glut
12m_rep1	AATTTGCCAAACCCTA-1	327	Oligo NN	327 Oligo NN	31	OPC-Oligo	31 OPC-Oligo
12m_rep1	AATTTGCCACCTCAGG-1	197	SNr Six3 Gaba	197 SNr Six3 Gaba	20	MB GABA	20 MB GABA
12m_rep1	AATTTGCCAGCACCAT-1	135	STN-PSTN Pitx2 Glut	135 STN-PSTN Pitx2 Glut	14	HY Glut	14 HY Glut
12m_rep1	AATTTGCCATTAAACC-1	327	Oligo NN	327 Oligo NN	31	OPC-Oligo	31 OPC-Oligo
12m_rep1	ACAAACTGTTGGCGTG-1	165	PAG-MRN Pou3f1 Glut	165 PAG-MRN Pou3f1 Glut	19	MB Glut	19 MB Glut
12m_rep1	ACAACAACAATAGCCC-1	327	Oligo NN	327 Oligo NN	31	OPC-Oligo	31 OPC-Oligo
12m_rep1	ACAACAACAATTTGGT-1	327	Oligo NN	327 Oligo NN	31	OPC-Oligo	31 OPC-Oligo
12m_rep1	ACAACAACACCAACCG-1	197	SNr Six3 Gaba	197 SNr Six3 Gaba	20	MB GABA	20 MB GABA
12m_rep1	ACAACAACAGTTATGT-1	327	Oligo NN	327 Oligo NN	31	OPC-Oligo	31 OPC-Oligo
12m_rep1	ACAACAACATAGCTTG-1	327	Oligo NN	327 Oligo NN	31	OPC-Oligo	31 OPC-Oligo
12m_rep1	ACAACACTCCAAACAC-1	327	Oligo NN	327 Oligo NN	31	OPC-Oligo	31 OPC-Oligo
12m_rep1	ACAACACTCCTAGTAA-1	327	Oligo NN	327 Oligo NN	31	OPC-Oligo	31 OPC-Oligo
12m_rep1	ACAACACTCGATTCTT-1	141	PH-SUM Foxa1 Glut	141 PH-SUM Foxa1 Glut	14	HY Glut	14 HY Glut
12m_rep1	ACAACACTCGTTAGTA-1	326	OPC NN	326 OPC NN	31	OPC-Oligo	31 OPC-Oligo
12m_rep1	ACAACACTCTAAGTGC-1	327	Oligo NN	327 Oligo NN	31	OPC-Oligo	31 OPC-Oligo
12m_rep1	ACAACAGAGCATTAGC-1	327	Oligo NN	327 Oligo NN	31	OPC-Oligo	31 OPC-Oligo
12m_rep1	ACAACAGAGCGTGCGT-1	138	PH Pitx2 Glut	138 PH Pitx2 Glut	14	HY Glut	14 HY Glut
12m_rep1	ACAACAGAGTAGAGGC-1	197	SNr Six3 Gaba	197 SNr Six3 Gaba	20	MB GABA	20 MB GABA
12m_rep1	ACAACATGTGCCTCAC-1	213	SCsg Gabrr2 Gaba	213 SCsg Gabrr2 Gaba	20	MB GABA	20 MB GABA
12m_rep1	ACACAATGTACCGGAT-1	327	Oligo NN	327 Oligo NN	31	OPC-Oligo	31 OPC-Oligo
12m_rep1	ACACAATGTATTGGAT-1	327	Oligo NN	327 Oligo NN	31	OPC-Oligo	31 OPC-Oligo
12m_rep1	ACACAATGTCAACAAT-1	16	CA1-ProS Glut	016 CA1-ProS Glut	1	IT-ET Glut	01 IT-ET Glut
12m_rep1	ACACAATGTCATGAGC-1	327	Oligo NN	327 Oligo NN	31	OPC-Oligo	31 OPC-Oligo
12m_rep1	ACACAATGTTAAGCCA-1	215	SNc-VTA-RAmb Foxa1 Dopa	215 SNc-VTA-RAmb Foxa1 Dopa	21	MB Dopa	21 MB Dopa
12m_rep1	ACACAATGTTAGGATT-1	135	STN-PSTN Pitx2 Glut	135 STN-PSTN Pitx2 Glut	14	HY Glut	14 HY Glut
12m_rep1	ACACAATGTTTGTGGA-1	197	SNr Six3 Gaba	197 SNr Six3 Gaba	20	MB GABA	20 MB GABA
12m_rep1	ACACCTTGTATTTGGG-1	327	Oligo NN	327 Oligo NN	31	OPC-Oligo	31 OPC-Oligo
12m_rep1	ACACCTTGTCATCAAG-1	327	Oligo NN	327 Oligo NN	31	OPC-Oligo	31 OPC-Oligo
12m_rep1	ACACCTTGTGATTTGG-1	326	OPC NN	326 OPC NN	31	OPC-Oligo	31 OPC-Oligo
12m_rep1	ACACCTTGTGCCGCAA-1	327	Oligo NN	327 Oligo NN	31	OPC-Oligo	31 OPC-Oligo
12m_rep1	ACACCTTGTGCGCGTA-1	327	Oligo NN	327 Oligo NN	31	OPC-Oligo	31 OPC-Oligo
12m_rep1	ACACCTTGTTAGACCA-1	197	SNr Six3 Gaba	197 SNr Six3 Gaba	20	MB GABA	20 MB GABA
12m_rep1	ACACCTTGTTGAGGTC-1	327	Oligo NN	327 Oligo NN	31	OPC-Oligo	31 OPC-Oligo
12m_rep1	ACACCTTGTTTGGTTC-1	327	Oligo NN	327 Oligo NN	31	OPC-Oligo	31 OPC-Oligo
12m_rep1	ACACGGACAATTATGC-1	327	Oligo NN	327 Oligo NN	31	OPC-Oligo	31 OPC-Oligo
12m_rep1	ACACTAATCGACAAAG-1	327	Oligo NN	327 Oligo NN	31	OPC-Oligo	31 OPC-Oligo
12m_rep1	ACACTAATCGTTTCGC-1	327	Oligo NN	327 Oligo NN	31	OPC-Oligo	31 OPC-Oligo
12m_rep1	ACACTAGGTAATAACC-1	326	OPC NN	326 OPC NN	31	OPC-Oligo	31 OPC-Oligo
12m_rep1	ACACTAGGTCAAGTAT-1	135	STN-PSTN Pitx2 Glut	135 STN-PSTN Pitx2 Glut	14	HY Glut	14 HY Glut
12m_rep1	ACACTAGGTCCTTCAG-1	318	Astro-NT NN	318 Astro-NT NN	30	Astro-Epen	30 Astro-Epen
12m_rep1	ACACTAGGTGATGATT-1	327	Oligo NN	327 Oligo NN	31	OPC-Oligo	31 OPC-Oligo
12m_rep1	ACACTAGGTTGTAAAC-1	327	Oligo NN	327 Oligo NN	31	OPC-Oligo	31 OPC-Oligo
12m_rep1	ACACTAGGTTGTGATG-1	327	Oligo NN	327 Oligo NN	31	OPC-Oligo	31 OPC-Oligo
12m_rep1	ACACTTAAGCTCATAA-1	16	CA1-ProS Glut	016 CA1-ProS Glut	1	IT-ET Glut	01 IT-ET Glut
12m_rep1	ACACTTAAGGCGCACT-1	327	Oligo NN	327 Oligo NN	31	OPC-Oligo	31 OPC-Oligo
12m_rep1	ACACTTAAGGTTACAC-1	327	Oligo NN	327 Oligo NN	31	OPC-Oligo	31 OPC-Oligo
12m_rep1	ACACTTAAGTTAGCTA-1	139	PH-LHA Foxb1 Glut	139 PH-LHA Foxb1 Glut	14	HY Glut	14 HY Glut
12m_rep1	ACACTTGCAATGAATG-1	16	CA1-ProS Glut	016 CA1-ProS Glut	1	IT-ET Glut	01 IT-ET Glut
12m_rep1	ACACTTGCACAGAACG-1	327	Oligo NN	327 Oligo NN	31	OPC-Oligo	31 OPC-Oligo
12m_rep1	ACACTTGCACGTTACA-1	318	Astro-NT NN	318 Astro-NT NN	30	Astro-Epen	30 Astro-Epen
12m_rep1	ACACTTGCATCCCTCA-1	327	Oligo NN	327 Oligo NN	31	OPC-Oligo	31 OPC-Oligo
12m_rep1	ACACTTGCATGAGCAG-1	135	STN-PSTN Pitx2 Glut	135 STN-PSTN Pitx2 Glut	14	HY Glut	14 HY Glut
12m_rep1	ACACTTGCATTAGCCA-1	327	Oligo NN	327 Oligo NN	31	OPC-Oligo	31 OPC-Oligo
12m_rep1	ACAGCCGGTACTTAGG-1	327	Oligo NN	327 Oligo NN	31	OPC-Oligo	31 OPC-Oligo
12m_rep1	ACAGCCGGTATTGCAG-1	327	Oligo NN	327 Oligo NN	31	OPC-Oligo	31 OPC-Oligo
12m_rep1	ACAGCCGGTTAATCGG-1	166	MRN Pou3f1 C1ql4 Glut	166 MRN Pou3f1 C1ql4 Glut	19	MB Glut	19 MB Glut
12m_rep1	ACAGCCGGTTATTGCC-1	327	Oligo NN	327 Oligo NN	31	OPC-Oligo	31 OPC-Oligo
12m_rep1	ACAGCCGGTTTATCTG-1	318	Astro-NT NN	318 Astro-NT NN	30	Astro-Epen	30 Astro-Epen
12m_rep1	ACAGCGCTCAAACACC-1	327	Oligo NN	327 Oligo NN	31	OPC-Oligo	31 OPC-Oligo
12m_rep1	ACAGCGCTCACAGGAA-1	327	Oligo NN	327 Oligo NN	31	OPC-Oligo	31 OPC-Oligo
12m_rep1	ACAGCGCTCATGTCAA-1	135	STN-PSTN Pitx2 Glut	135 STN-PSTN Pitx2 Glut	14	HY Glut	14 HY Glut
12m_rep1	ACAGCGCTCCCAGTAG-1	197	SNr Six3 Gaba	197 SNr Six3 Gaba	20	MB GABA	20 MB GABA
12m_rep1	ACAGCGCTCCTCACTA-1	327	Oligo NN	327 Oligo NN	31	OPC-Oligo	31 OPC-Oligo
12m_rep1	ACAGGAATCAGGAACA-1	326	OPC NN	326 OPC NN	31	OPC-Oligo	31 OPC-Oligo
12m_rep1	ACAGGAATCATGCTTT-1	327	Oligo NN	327 Oligo NN	31	OPC-Oligo	31 OPC-Oligo
12m_rep1	ACAGGAATCGCTAAAC-1	135	STN-PSTN Pitx2 Glut	135 STN-PSTN Pitx2 Glut	14	HY Glut	14 HY Glut
12m_rep1	ACAGGAATCGTCATTT-1	318	Astro-NT NN	318 Astro-NT NN	30	Astro-Epen	30 Astro-Epen
12m_rep1	ACAGGAATCTGTGAGT-1	16	CA1-ProS Glut	016 CA1-ProS Glut	1	IT-ET Glut	01 IT-ET Glut
12m_rep1	ACAGGATCAATAGCAA-1	138	PH Pitx2 Glut	138 PH Pitx2 Glut	14	HY Glut	14 HY Glut
12m_rep1	ACAGGATCAGGCTGTT-1	166	MRN Pou3f1 C1ql4 Glut	166 MRN Pou3f1 C1ql4 Glut	19	MB Glut	19 MB Glut
12m_rep1	ACAGGATCAGTAAAGC-1	327	Oligo NN	327 Oligo NN	31	OPC-Oligo	31 OPC-Oligo
12m_rep1	ACAGGCTGTTAGTTGG-1	327	Oligo NN	327 Oligo NN	31	OPC-Oligo	31 OPC-Oligo
12m_rep1	ACAGGCTGTTGGATCA-1	327	Oligo NN	327 Oligo NN	31	OPC-Oligo	31 OPC-Oligo
12m_rep1	ACAGGCTGTTTGGGCG-1	197	SNr Six3 Gaba	197 SNr Six3 Gaba	20	MB GABA	20 MB GABA
12m_rep1	ACAGGCTGTTTGGGTA-1	327	Oligo NN	327 Oligo NN	31	OPC-Oligo	31 OPC-Oligo
12m_rep1	ACAGGTAAGCTCATAA-1	327	Oligo NN	327 Oligo NN	31	OPC-Oligo	31 OPC-Oligo
12m_rep1	ACAGGTAAGGAGGGTT-1	135	STN-PSTN Pitx2 Glut	135 STN-PSTN Pitx2 Glut	14	HY Glut	14 HY Glut
12m_rep1	ACAGGTAAGTAGCGCC-1	166	MRN Pou3f1 C1ql4 Glut	166 MRN Pou3f1 C1ql4 Glut	19	MB Glut	19 MB Glut
12m_rep1	ACAGGTAAGTAGCGGG-1	327	Oligo NN	327 Oligo NN	31	OPC-Oligo	31 OPC-Oligo
12m_rep1	ACAGTATGTCCTCCAA-1	327	Oligo NN	327 Oligo NN	31	OPC-Oligo	31 OPC-Oligo
12m_rep1	ACAGTATGTGGTTATG-1	138	PH Pitx2 Glut	138 PH Pitx2 Glut	14	HY Glut	14 HY Glut
12m_rep1	ACAGTATGTGTGAGGA-1	327	Oligo NN	327 Oligo NN	31	OPC-Oligo	31 OPC-Oligo
12m_rep1	ACAGTATGTGTGCAAC-1	334	Microglia NN	334 Microglia NN	34	Immune	34 Immune
12m_rep1	ACAGTATGTGTGTCCC-1	327	Oligo NN	327 Oligo NN	31	OPC-Oligo	31 OPC-Oligo
12m_rep1	ACAGTATGTTAGTGAT-1	327	Oligo NN	327 Oligo NN	31	OPC-Oligo	31 OPC-Oligo
12m_rep1	ACAGTATGTTCAAGCA-1	197	SNr Six3 Gaba	197 SNr Six3 Gaba	20	MB GABA	20 MB GABA
12m_rep1	ACAGTATGTTTGTTGC-1	197	SNr Six3 Gaba	197 SNr Six3 Gaba	20	MB GABA	20 MB GABA
12m_rep1	ACATAGCTCACCTGCT-1	327	Oligo NN	327 Oligo NN	31	OPC-Oligo	31 OPC-Oligo
12m_rep1	ACATAGCTCCCTCTAA-1	327	Oligo NN	327 Oligo NN	31	OPC-Oligo	31 OPC-Oligo
12m_rep1	ACATAGCTCCGCCTCA-1	197	SNr Six3 Gaba	197 SNr Six3 Gaba	20	MB GABA	20 MB GABA
12m_rep1	ACATAGCTCGCTCCAT-1	197	SNr Six3 Gaba	197 SNr Six3 Gaba	20	MB GABA	20 MB GABA
12m_rep1	ACATAGCTCTAACTGA-1	213	SCsg Gabrr2 Gaba	213 SCsg Gabrr2 Gaba	20	MB GABA	20 MB GABA
12m_rep1	ACATAGCTCTGGCAAT-1	327	Oligo NN	327 Oligo NN	31	OPC-Oligo	31 OPC-Oligo
12m_rep1	ACATCAATCATGCTCC-1	327	Oligo NN	327 Oligo NN	31	OPC-Oligo	31 OPC-Oligo
12m_rep1	ACATCAATCATGGCCA-1	327	Oligo NN	327 Oligo NN	31	OPC-Oligo	31 OPC-Oligo
12m_rep1	ACATCAATCTATTGTC-1	327	Oligo NN	327 Oligo NN	31	OPC-Oligo	31 OPC-Oligo
12m_rep1	ACATCAATCTGTGCAG-1	327	Oligo NN	327 Oligo NN	31	OPC-Oligo	31 OPC-Oligo
12m_rep1	ACATCATCACTGACTA-1	197	SNr Six3 Gaba	197 SNr Six3 Gaba	20	MB GABA	20 MB GABA
12m_rep1	ACATCATCATATTGAC-1	327	Oligo NN	327 Oligo NN	31	OPC-Oligo	31 OPC-Oligo
12m_rep1	ACATTAGTCCGCAACA-1	197	SNr Six3 Gaba	197 SNr Six3 Gaba	20	MB GABA	20 MB GABA
12m_rep1	ACATTAGTCCGGAACC-1	327	Oligo NN	327 Oligo NN	31	OPC-Oligo	31 OPC-Oligo
12m_rep1	ACATTAGTCCTAATGA-1	334	Microglia NN	334 Microglia NN	34	Immune	34 Immune
12m_rep1	ACATTGCAGACACCGC-1	327	Oligo NN	327 Oligo NN	31	OPC-Oligo	31 OPC-Oligo
12m_rep1	ACATTGCAGACTTATG-1	141	PH-SUM Foxa1 Glut	141 PH-SUM Foxa1 Glut	14	HY Glut	14 HY Glut
12m_rep1	ACATTGCAGGTTAGAG-1	327	Oligo NN	327 Oligo NN	31	OPC-Oligo	31 OPC-Oligo
12m_rep1	ACCAAACTCAAACCTA-1	334	Microglia NN	334 Microglia NN	34	Immune	34 Immune
12m_rep1	ACCAAACTCAATGTGC-1	327	Oligo NN	327 Oligo NN	31	OPC-Oligo	31 OPC-Oligo
12m_rep1	ACCAAACTCATGAAGG-1	327	Oligo NN	327 Oligo NN	31	OPC-Oligo	31 OPC-Oligo
12m_rep1	ACCAAACTCATGCATA-1	327	Oligo NN	327 Oligo NN	31	OPC-Oligo	31 OPC-Oligo
12m_rep1	ACCAAACTCCGCACAA-1	327	Oligo NN	327 Oligo NN	31	OPC-Oligo	31 OPC-Oligo
12m_rep1	ACCAAACTCCTAAGGT-1	327	Oligo NN	327 Oligo NN	31	OPC-Oligo	31 OPC-Oligo
12m_rep1	ACCAAACTCCTGCGAA-1	327	Oligo NN	327 Oligo NN	31	OPC-Oligo	31 OPC-Oligo
12m_rep1	ACCAAGCGTTGGATCA-1	326	OPC NN	326 OPC NN	31	OPC-Oligo	31 OPC-Oligo
12m_rep1	ACCAAGTTCAACCAAC-1	334	Microglia NN	334 Microglia NN	34	Immune	34 Immune
12m_rep1	ACCAAGTTCAGGTTTA-1	327	Oligo NN	327 Oligo NN	31	OPC-Oligo	31 OPC-Oligo
12m_rep1	ACCAAGTTCCCTTGCG-1	327	Oligo NN	327 Oligo NN	31	OPC-Oligo	31 OPC-Oligo
12m_rep1	ACCAAGTTCCTAGTTT-1	327	Oligo NN	327 Oligo NN	31	OPC-Oligo	31 OPC-Oligo
12m_rep1	ACCAAGTTCCTCACAC-1	327	Oligo NN	327 Oligo NN	31	OPC-Oligo	31 OPC-Oligo
12m_rep1	ACCAATATCACGAATC-1	327	Oligo NN	327 Oligo NN	31	OPC-Oligo	31 OPC-Oligo
12m_rep1	ACCAATATCATAAGCC-1	327	Oligo NN	327 Oligo NN	31	OPC-Oligo	31 OPC-Oligo
12m_rep1	ACCAATATCCAGGTTG-1	197	SNr Six3 Gaba	197 SNr Six3 Gaba	20	MB GABA	20 MB GABA
12m_rep1	ACCAATATCCGCTAGA-1	327	Oligo NN	327 Oligo NN	31	OPC-Oligo	31 OPC-Oligo
12m_rep1	ACCAATATCTTAAGTG-1	326	OPC NN	326 OPC NN	31	OPC-Oligo	31 OPC-Oligo
12m_rep1	ACCACACCAAACGGGC-1	327	Oligo NN	327 Oligo NN	31	OPC-Oligo	31 OPC-Oligo
12m_rep1	ACCACACCAATTTAGC-1	135	STN-PSTN Pitx2 Glut	135 STN-PSTN Pitx2 Glut	14	HY Glut	14 HY Glut
12m_rep1	ACCACACCACCCACCT-1	197	SNr Six3 Gaba	197 SNr Six3 Gaba	20	MB GABA	20 MB GABA
12m_rep1	ACCACACCACCCTCAC-1	327	Oligo NN	327 Oligo NN	31	OPC-Oligo	31 OPC-Oligo
12m_rep1	ACCACACCAGCATGTC-1	327	Oligo NN	327 Oligo NN	31	OPC-Oligo	31 OPC-Oligo
12m_rep1	ACCACACCATGGAGGC-1	93	RT-ZI Gnb3 Gaba	093 RT-ZI Gnb3 Gaba	12	HY GABA	12 HY GABA
12m_rep1	ACCACATAGATGCCTG-1	327	Oligo NN	327 Oligo NN	31	OPC-Oligo	31 OPC-Oligo
12m_rep1	ACCACATAGCAATAGG-1	135	STN-PSTN Pitx2 Glut	135 STN-PSTN Pitx2 Glut	14	HY Glut	14 HY Glut
12m_rep1	ACCACATAGCAGGCCT-1	334	Microglia NN	334 Microglia NN	34	Immune	34 Immune
12m_rep1	ACCACATAGGATCCGC-1	327	Oligo NN	327 Oligo NN	31	OPC-Oligo	31 OPC-Oligo
12m_rep1	ACCACATAGGCGCATC-1	327	Oligo NN	327 Oligo NN	31	OPC-Oligo	31 OPC-Oligo
12m_rep1	ACCACATAGGCTGGCT-1	334	Microglia NN	334 Microglia NN	34	Immune	34 Immune
12m_rep1	ACCAGCTCAAACATAG-1	327	Oligo NN	327 Oligo NN	31	OPC-Oligo	31 OPC-Oligo
12m_rep1	ACCAGCTCAATTAAGG-1	197	SNr Six3 Gaba	197 SNr Six3 Gaba	20	MB GABA	20 MB GABA
12m_rep1	ACCAGCTCAATTTAGC-1	327	Oligo NN	327 Oligo NN	31	OPC-Oligo	31 OPC-Oligo
12m_rep1	ACCAGCTCAGCAATAA-1	197	SNr Six3 Gaba	197 SNr Six3 Gaba	20	MB GABA	20 MB GABA
12m_rep1	ACCAGCTCAGGAAGCC-1	327	Oligo NN	327 Oligo NN	31	OPC-Oligo	31 OPC-Oligo
12m_rep1	ACCAGCTCAGTCTAGC-1	195	SNr-VTA Pax5 Npas1 Gaba	195 SNr-VTA Pax5 Npas1 Gaba	20	MB GABA	20 MB GABA
12m_rep1	ACCAGCTCAGTTGCGT-1	327	Oligo NN	327 Oligo NN	31	OPC-Oligo	31 OPC-Oligo
12m_rep1	ACCAGGACAAGCCAGA-1	327	Oligo NN	327 Oligo NN	31	OPC-Oligo	31 OPC-Oligo
12m_rep1	ACCAGGACACGGTACT-1	16	CA1-ProS Glut	016 CA1-ProS Glut	1	IT-ET Glut	01 IT-ET Glut
12m_rep1	ACCAGGCTCATGCAAC-1	101	ZI Pax6 Gaba	101 ZI Pax6 Gaba	12	HY GABA	12 HY GABA
12m_rep1	ACCAGGCTCGATTATG-1	327	Oligo NN	327 Oligo NN	31	OPC-Oligo	31 OPC-Oligo
12m_rep1	ACCAGGCTCTACCTGC-1	327	Oligo NN	327 Oligo NN	31	OPC-Oligo	31 OPC-Oligo
12m_rep1	ACCAGGGAGAAGCTAG-1	16	CA1-ProS Glut	016 CA1-ProS Glut	1	IT-ET Glut	01 IT-ET Glut
12m_rep1	ACCAGGGAGGTCCTAG-1	135	STN-PSTN Pitx2 Glut	135 STN-PSTN Pitx2 Glut	14	HY Glut	14 HY Glut
12m_rep1	ACCATAATCATTACAG-1	327	Oligo NN	327 Oligo NN	31	OPC-Oligo	31 OPC-Oligo
12m_rep1	ACCATAATCTCACAAA-1	327	Oligo NN	327 Oligo NN	31	OPC-Oligo	31 OPC-Oligo
12m_rep1	ACCATAATCTTGATGA-1	327	Oligo NN	327 Oligo NN	31	OPC-Oligo	31 OPC-Oligo
12m_rep1	ACCATAATCTTTGTAC-1	197	SNr Six3 Gaba	197 SNr Six3 Gaba	20	MB GABA	20 MB GABA
12m_rep1	ACCATTAAGACCATAC-1	327	Oligo NN	327 Oligo NN	31	OPC-Oligo	31 OPC-Oligo
12m_rep1	ACCATTAAGCCTCTCG-1	327	Oligo NN	327 Oligo NN	31	OPC-Oligo	31 OPC-Oligo
12m_rep1	ACCATTAAGCCTCTGT-1	318	Astro-NT NN	318 Astro-NT NN	30	Astro-Epen	30 Astro-Epen
12m_rep1	ACCATTAAGCTGAGGG-1	327	Oligo NN	327 Oligo NN	31	OPC-Oligo	31 OPC-Oligo
12m_rep1	ACCATTAAGTCGCTAG-1	327	Oligo NN	327 Oligo NN	31	OPC-Oligo	31 OPC-Oligo
12m_rep1	ACCATTAAGTTAGACC-1	327	Oligo NN	327 Oligo NN	31	OPC-Oligo	31 OPC-Oligo
12m_rep1	ACCCAACCACTGGCCA-1	327	Oligo NN	327 Oligo NN	31	OPC-Oligo	31 OPC-Oligo
12m_rep1	ACCCAACCACTTGTTC-1	327	Oligo NN	327 Oligo NN	31	OPC-Oligo	31 OPC-Oligo
12m_rep1	ACCCAACCAGCTTAGC-1	327	Oligo NN	327 Oligo NN	31	OPC-Oligo	31 OPC-Oligo
12m_rep1	ACCCAGGGTAACAGGG-1	327	Oligo NN	327 Oligo NN	31	OPC-Oligo	31 OPC-Oligo
12m_rep1	ACCCAGGGTAATGACT-1	327	Oligo NN	327 Oligo NN	31	OPC-Oligo	31 OPC-Oligo
12m_rep1	ACCCAGGGTAGGTTGC-1	197	SNr Six3 Gaba	197 SNr Six3 Gaba	20	MB GABA	20 MB GABA
12m_rep1	ACCCAGGGTCACGGAT-1	327	Oligo NN	327 Oligo NN	31	OPC-Oligo	31 OPC-Oligo
12m_rep1	ACCCAGGGTCCTTCTC-1	327	Oligo NN	327 Oligo NN	31	OPC-Oligo	31 OPC-Oligo
12m_rep1	ACCCAGGGTCGACTAA-1	318	Astro-NT NN	318 Astro-NT NN	30	Astro-Epen	30 Astro-Epen
12m_rep1	ACCCAGGGTGCTAGAC-1	327	Oligo NN	327 Oligo NN	31	OPC-Oligo	31 OPC-Oligo
12m_rep1	ACCCAGGGTGCTTACT-1	16	CA1-ProS Glut	016 CA1-ProS Glut	1	IT-ET Glut	01 IT-ET Glut
12m_rep1	ACCCAGGGTGGTTATG-1	318	Astro-NT NN	318 Astro-NT NN	30	Astro-Epen	30 Astro-Epen
12m_rep1	ACCCAGGGTTAGGATT-1	327	Oligo NN	327 Oligo NN	31	OPC-Oligo	31 OPC-Oligo
12m_rep1	ACCCGCTGTAAGCACC-1	327	Oligo NN	327 Oligo NN	31	OPC-Oligo	31 OPC-Oligo
12m_rep1	ACCCGCTGTCCAAGAC-1	135	STN-PSTN Pitx2 Glut	135 STN-PSTN Pitx2 Glut	14	HY Glut	14 HY Glut
12m_rep1	ACCCGCTGTGCGCGTA-1	327	Oligo NN	327 Oligo NN	31	OPC-Oligo	31 OPC-Oligo
12m_rep1	ACCCGCTGTGGTTATG-1	327	Oligo NN	327 Oligo NN	31	OPC-Oligo	31 OPC-Oligo
12m_rep1	ACCCGCTGTTAAATGC-1	166	MRN Pou3f1 C1ql4 Glut	166 MRN Pou3f1 C1ql4 Glut	19	MB Glut	19 MB Glut
12m_rep1	ACCCGCTGTTCACTGT-1	327	Oligo NN	327 Oligo NN	31	OPC-Oligo	31 OPC-Oligo
12m_rep1	ACCCGCTGTTTGGGTA-1	327	Oligo NN	327 Oligo NN	31	OPC-Oligo	31 OPC-Oligo
12m_rep1	ACCCGGTAGCACTTGG-1	327	Oligo NN	327 Oligo NN	31	OPC-Oligo	31 OPC-Oligo
12m_rep1	ACCCGGTAGCAGCTAT-1	327	Oligo NN	327 Oligo NN	31	OPC-Oligo	31 OPC-Oligo
12m_rep1	ACCCGTAAGAACCTGT-1	138	PH Pitx2 Glut	138 PH Pitx2 Glut	14	HY Glut	14 HY Glut
12m_rep1	ACCCGTAAGTAACCCG-1	327	Oligo NN	327 Oligo NN	31	OPC-Oligo	31 OPC-Oligo
12m_rep1	ACCCGTAAGTAATCCA-1	327	Oligo NN	327 Oligo NN	31	OPC-Oligo	31 OPC-Oligo
12m_rep1	ACCCGTAAGTTCCTCA-1	327	Oligo NN	327 Oligo NN	31	OPC-Oligo	31 OPC-Oligo
12m_rep1	ACCCTCCCAAGCGATG-1	215	SNc-VTA-RAmb Foxa1 Dopa	215 SNc-VTA-RAmb Foxa1 Dopa	21	MB Dopa	21 MB Dopa
12m_rep1	ACCCTCCCAGTTATGT-1	327	Oligo NN	327 Oligo NN	31	OPC-Oligo	31 OPC-Oligo
12m_rep1	ACCCTCCCATAGCTGC-1	327	Oligo NN	327 Oligo NN	31	OPC-Oligo	31 OPC-Oligo
12m_rep1	ACCCTCCCATGCTCCC-1	197	SNr Six3 Gaba	197 SNr Six3 Gaba	20	MB GABA	20 MB GABA
12m_rep1	ACCCTCCCATTGTGCA-1	327	Oligo NN	327 Oligo NN	31	OPC-Oligo	31 OPC-Oligo
12m_rep1	ACCCTGTTCATAATCG-1	326	OPC NN	326 OPC NN	31	OPC-Oligo	31 OPC-Oligo
12m_rep1	ACCCTGTTCATCCTCA-1	327	Oligo NN	327 Oligo NN	31	OPC-Oligo	31 OPC-Oligo
12m_rep1	ACCCTGTTCGTTATCT-1	16	CA1-ProS Glut	016 CA1-ProS Glut	1	IT-ET Glut	01 IT-ET Glut
12m_rep1	ACCCTGTTCTGGCAAT-1	327	Oligo NN	327 Oligo NN	31	OPC-Oligo	31 OPC-Oligo
12m_rep1	ACCGAAGCATAATCGT-1	327	Oligo NN	327 Oligo NN	31	OPC-Oligo	31 OPC-Oligo
12m_rep1	ACCGAAGCATAGACCC-1	327	Oligo NN	327 Oligo NN	31	OPC-Oligo	31 OPC-Oligo
12m_rep1	ACCGAAGCATAGTCAT-1	101	ZI Pax6 Gaba	101 ZI Pax6 Gaba	12	HY GABA	12 HY GABA
12m_rep1	ACCGCAATCCTAATAG-1	327	Oligo NN	327 Oligo NN	31	OPC-Oligo	31 OPC-Oligo
12m_rep1	ACCGCAATCCTGCGAA-1	327	Oligo NN	327 Oligo NN	31	OPC-Oligo	31 OPC-Oligo
12m_rep1	ACCGCAATCTAATCTC-1	327	Oligo NN	327 Oligo NN	31	OPC-Oligo	31 OPC-Oligo
12m_rep1	ACCGCAATCTTAGTCT-1	327	Oligo NN	327 Oligo NN	31	OPC-Oligo	31 OPC-Oligo
12m_rep1	ACCGCAATCTTGCAGG-1	327	Oligo NN	327 Oligo NN	31	OPC-Oligo	31 OPC-Oligo
12m_rep1	ACCGGCTAGAGAAGGG-1	16	CA1-ProS Glut	016 CA1-ProS Glut	1	IT-ET Glut	01 IT-ET Glut
12m_rep1	ACCGGCTAGGATCACT-1	327	Oligo NN	327 Oligo NN	31	OPC-Oligo	31 OPC-Oligo
12m_rep1	ACCGGTTCATAAGTTC-1	327	Oligo NN	327 Oligo NN	31	OPC-Oligo	31 OPC-Oligo
12m_rep1	ACCTAAATCAAGCTAC-1	327	Oligo NN	327 Oligo NN	31	OPC-Oligo	31 OPC-Oligo
12m_rep1	ACCTAAATCATTGTCT-1	327	Oligo NN	327 Oligo NN	31	OPC-Oligo	31 OPC-Oligo
12m_rep1	ACCTAAGGTCGTTACT-1	327	Oligo NN	327 Oligo NN	31	OPC-Oligo	31 OPC-Oligo
12m_rep1	ACCTACCTCAACCAAC-1	327	Oligo NN	327 Oligo NN	31	OPC-Oligo	31 OPC-Oligo
12m_rep1	ACCTACCTCTAGCTAA-1	327	Oligo NN	327 Oligo NN	31	OPC-Oligo	31 OPC-Oligo
12m_rep1	ACCTACCTCTATCGCC-1	319	Astro-TE NN	319 Astro-TE NN	30	Astro-Epen	30 Astro-Epen
12m_rep1	ACCTACCTCTCCTCTT-1	327	Oligo NN	327 Oligo NN	31	OPC-Oligo	31 OPC-Oligo
12m_rep1	ACCTACCTCTGTGCAG-1	327	Oligo NN	327 Oligo NN	31	OPC-Oligo	31 OPC-Oligo
12m_rep1	ACCTCACTCAAAGGCA-1	156	MB-ant-ve Dmrta2 Glut	156 MB-ant-ve Dmrta2 Glut	19	MB Glut	19 MB Glut
12m_rep1	ACCTCACTCAATCATG-1	327	Oligo NN	327 Oligo NN	31	OPC-Oligo	31 OPC-Oligo
12m_rep1	ACCTCACTCATGCTAA-1	327	Oligo NN	327 Oligo NN	31	OPC-Oligo	31 OPC-Oligo
12m_rep1	ACCTCACTCGCCTGTT-1	327	Oligo NN	327 Oligo NN	31	OPC-Oligo	31 OPC-Oligo
12m_rep1	ACCTCACTCTCACTCA-1	334	Microglia NN	334 Microglia NN	34	Immune	34 Immune
12m_rep1	ACCTCACTCTTGCTAT-1	327	Oligo NN	327 Oligo NN	31	OPC-Oligo	31 OPC-Oligo
12m_rep1	ACCTCACTCTTTAAGG-1	327	Oligo NN	327 Oligo NN	31	OPC-Oligo	31 OPC-Oligo
12m_rep1	ACCTGGATCAAGGACA-1	166	MRN Pou3f1 C1ql4 Glut	166 MRN Pou3f1 C1ql4 Glut	19	MB Glut	19 MB Glut
12m_rep1	ACCTGGATCAGCACCA-1	327	Oligo NN	327 Oligo NN	31	OPC-Oligo	31 OPC-Oligo
12m_rep1	ACCTGGATCATAACTG-1	16	CA1-ProS Glut	016 CA1-ProS Glut	1	IT-ET Glut	01 IT-ET Glut
12m_rep1	ACCTGGATCCTGGCTT-1	327	Oligo NN	327 Oligo NN	31	OPC-Oligo	31 OPC-Oligo
12m_rep1	ACCTGGATCTGTGCAG-1	16	CA1-ProS Glut	016 CA1-ProS Glut	1	IT-ET Glut	01 IT-ET Glut
12m_rep1	ACCTGGTCAACAGCCT-1	327	Oligo NN	327 Oligo NN	31	OPC-Oligo	31 OPC-Oligo
12m_rep1	ACCTGGTCACCCACCT-1	327	Oligo NN	327 Oligo NN	31	OPC-Oligo	31 OPC-Oligo
12m_rep1	ACCTGGTCATTAGGTT-1	327	Oligo NN	327 Oligo NN	31	OPC-Oligo	31 OPC-Oligo
12m_rep1	ACCTGGTCATTCAGCA-1	327	Oligo NN	327 Oligo NN	31	OPC-Oligo	31 OPC-Oligo
12m_rep1	ACCTGTTGTACTGAAT-1	327	Oligo NN	327 Oligo NN	31	OPC-Oligo	31 OPC-Oligo
12m_rep1	ACCTGTTGTTATAGCG-1	327	Oligo NN	327 Oligo NN	31	OPC-Oligo	31 OPC-Oligo
12m_rep1	ACCTTCATCACACAGT-1	327	Oligo NN	327 Oligo NN	31	OPC-Oligo	31 OPC-Oligo
12m_rep1	ACCTTCATCCCGTTAC-1	327	Oligo NN	327 Oligo NN	31	OPC-Oligo	31 OPC-Oligo
12m_rep1	ACCTTCATCCTCACAC-1	327	Oligo NN	327 Oligo NN	31	OPC-Oligo	31 OPC-Oligo
12m_rep1	ACCTTCATCGTTTCCA-1	327	Oligo NN	327 Oligo NN	31	OPC-Oligo	31 OPC-Oligo
12m_rep1	ACCTTCATCTAAGGTC-1	327	Oligo NN	327 Oligo NN	31	OPC-Oligo	31 OPC-Oligo
12m_rep1	ACCTTCATCTCAATGA-1	197	SNr Six3 Gaba	197 SNr Six3 Gaba	20	MB GABA	20 MB GABA
12m_rep1	ACCTTCCAGAAAGGAA-1	327	Oligo NN	327 Oligo NN	31	OPC-Oligo	31 OPC-Oligo
12m_rep1	ACCTTCCAGCACGTTG-1	327	Oligo NN	327 Oligo NN	31	OPC-Oligo	31 OPC-Oligo
12m_rep1	ACCTTCCAGCGAGTAA-1	327	Oligo NN	327 Oligo NN	31	OPC-Oligo	31 OPC-Oligo
12m_rep1	ACCTTCCAGCTGTAAC-1	327	Oligo NN	327 Oligo NN	31	OPC-Oligo	31 OPC-Oligo
12m_rep1	ACCTTGCTCAGCAAAG-1	327	Oligo NN	327 Oligo NN	31	OPC-Oligo	31 OPC-Oligo
12m_rep1	ACCTTGCTCCTCGATC-1	327	Oligo NN	327 Oligo NN	31	OPC-Oligo	31 OPC-Oligo
12m_rep1	ACCTTGCTCGCAATCG-1	197	SNr Six3 Gaba	197 SNr Six3 Gaba	20	MB GABA	20 MB GABA
12m_rep1	ACCTTGTGTGGATGTC-1	327	Oligo NN	327 Oligo NN	31	OPC-Oligo	31 OPC-Oligo
12m_rep1	ACCTTGTGTGGATTCA-1	138	PH Pitx2 Glut	138 PH Pitx2 Glut	14	HY Glut	14 HY Glut
12m_rep1	ACCTTGTGTGTTAAAC-1	327	Oligo NN	327 Oligo NN	31	OPC-Oligo	31 OPC-Oligo
12m_rep1	ACGAACAAGCCTGATG-1	327	Oligo NN	327 Oligo NN	31	OPC-Oligo	31 OPC-Oligo
12m_rep1	ACGAACAAGCTGGACC-1	327	Oligo NN	327 Oligo NN	31	OPC-Oligo	31 OPC-Oligo
12m_rep1	ACGAACAAGCTTTGTT-1	326	OPC NN	326 OPC NN	31	OPC-Oligo	31 OPC-Oligo
12m_rep1	ACGAACAAGGAGGACT-1	334	Microglia NN	334 Microglia NN	34	Immune	34 Immune
12m_rep1	ACGAACAAGGCATGTT-1	135	STN-PSTN Pitx2 Glut	135 STN-PSTN Pitx2 Glut	14	HY Glut	14 HY Glut
12m_rep1	ACGAACAAGTATTGCA-1	197	SNr Six3 Gaba	197 SNr Six3 Gaba	20	MB GABA	20 MB GABA
12m_rep1	ACGAACAAGTTCCCGT-1	327	Oligo NN	327 Oligo NN	31	OPC-Oligo	31 OPC-Oligo
12m_rep1	ACGAAGTCAAACTAAG-1	326	OPC NN	326 OPC NN	31	OPC-Oligo	31 OPC-Oligo
12m_rep1	ACGAAGTCAGAAATTG-1	327	Oligo NN	327 Oligo NN	31	OPC-Oligo	31 OPC-Oligo
12m_rep1	ACGAAGTCAGGCCTTG-1	327	Oligo NN	327 Oligo NN	31	OPC-Oligo	31 OPC-Oligo
12m_rep1	ACGAAGTCAGTCTATG-1	135	STN-PSTN Pitx2 Glut	135 STN-PSTN Pitx2 Glut	14	HY Glut	14 HY Glut
12m_rep1	ACGAAGTCATTAAACC-1	135	STN-PSTN Pitx2 Glut	135 STN-PSTN Pitx2 Glut	14	HY Glut	14 HY Glut
12m_rep1	ACGAATCTCACAGCGC-1	327	Oligo NN	327 Oligo NN	31	OPC-Oligo	31 OPC-Oligo
12m_rep1	ACGAATCTCACTCAAA-1	327	Oligo NN	327 Oligo NN	31	OPC-Oligo	31 OPC-Oligo
12m_rep1	ACGAATCTCATCCTAT-1	195	SNr-VTA Pax5 Npas1 Gaba	195 SNr-VTA Pax5 Npas1 Gaba	20	MB GABA	20 MB GABA
12m_rep1	ACGAATCTCTCACACC-1	327	Oligo NN	327 Oligo NN	31	OPC-Oligo	31 OPC-Oligo
12m_rep1	ACGAATCTCTCCTCTT-1	327	Oligo NN	327 Oligo NN	31	OPC-Oligo	31 OPC-Oligo
12m_rep1	ACGAATCTCTTGTCTG-1	215	SNc-VTA-RAmb Foxa1 Dopa	215 SNc-VTA-RAmb Foxa1 Dopa	21	MB Dopa	21 MB Dopa
12m_rep1	ACGACAAAGGAATAAC-1	327	Oligo NN	327 Oligo NN	31	OPC-Oligo	31 OPC-Oligo
12m_rep1	ACGACTTAGAAAGGAA-1	138	PH Pitx2 Glut	138 PH Pitx2 Glut	14	HY Glut	14 HY Glut
12m_rep1	ACGACTTAGTCAGTAC-1	197	SNr Six3 Gaba	197 SNr Six3 Gaba	20	MB GABA	20 MB GABA
12m_rep1	ACGACTTAGTGAGGGT-1	327	Oligo NN	327 Oligo NN	31	OPC-Oligo	31 OPC-Oligo
12m_rep1	ACGAGTAAGCATTTCT-1	138	PH Pitx2 Glut	138 PH Pitx2 Glut	14	HY Glut	14 HY Glut
12m_rep1	ACGAGTAAGCTCCTTA-1	197	SNr Six3 Gaba	197 SNr Six3 Gaba	20	MB GABA	20 MB GABA
12m_rep1	ACGAGTAAGGACCGCT-1	327	Oligo NN	327 Oligo NN	31	OPC-Oligo	31 OPC-Oligo
12m_rep1	ACGAGTAAGGCTTAAC-1	93	RT-ZI Gnb3 Gaba	093 RT-ZI Gnb3 Gaba	12	HY GABA	12 HY GABA
12m_rep1	ACGAGTAAGTGTTGCG-1	327	Oligo NN	327 Oligo NN	31	OPC-Oligo	31 OPC-Oligo
12m_rep1	ACGATTCAGAGGAAGG-1	327	Oligo NN	327 Oligo NN	31	OPC-Oligo	31 OPC-Oligo
12m_rep1	ACGATTCAGGCCGGAA-1	327	Oligo NN	327 Oligo NN	31	OPC-Oligo	31 OPC-Oligo
12m_rep1	ACGATTCAGTTTGAGC-1	197	SNr Six3 Gaba	197 SNr Six3 Gaba	20	MB GABA	20 MB GABA
12m_rep1	ACGCAAGCAATAGCCC-1	327	Oligo NN	327 Oligo NN	31	OPC-Oligo	31 OPC-Oligo
12m_rep1	ACGCAAGCACCTCACC-1	197	SNr Six3 Gaba	197 SNr Six3 Gaba	20	MB GABA	20 MB GABA
12m_rep1	ACGCAAGCATCTAGCA-1	327	Oligo NN	327 Oligo NN	31	OPC-Oligo	31 OPC-Oligo
12m_rep1	ACGCACGGTAGCAGCT-1	327	Oligo NN	327 Oligo NN	31	OPC-Oligo	31 OPC-Oligo
12m_rep1	ACGCCACAGGTAAGCA-1	327	Oligo NN	327 Oligo NN	31	OPC-Oligo	31 OPC-Oligo
12m_rep1	ACGCCACAGGTCCACA-1	327	Oligo NN	327 Oligo NN	31	OPC-Oligo	31 OPC-Oligo
12m_rep1	ACGCCACAGGTGCGGA-1	327	Oligo NN	327 Oligo NN	31	OPC-Oligo	31 OPC-Oligo
12m_rep1	ACGCCTAAGATACTTG-1	326	OPC NN	326 OPC NN	31	OPC-Oligo	31 OPC-Oligo
12m_rep1	ACGCCTAAGCACAGAA-1	327	Oligo NN	327 Oligo NN	31	OPC-Oligo	31 OPC-Oligo
12m_rep1	ACGCCTAAGGGTCCAC-1	135	STN-PSTN Pitx2 Glut	135 STN-PSTN Pitx2 Glut	14	HY Glut	14 HY Glut
12m_rep1	ACGCCTAAGTTCCCGT-1	197	SNr Six3 Gaba	197 SNr Six3 Gaba	20	MB GABA	20 MB GABA
12m_rep1	ACGCCTTTCACGCATG-1	101	ZI Pax6 Gaba	101 ZI Pax6 Gaba	12	HY GABA	12 HY GABA
12m_rep1	ACGCCTTTCATGAAGG-1	327	Oligo NN	327 Oligo NN	31	OPC-Oligo	31 OPC-Oligo
12m_rep1	ACGCCTTTCATGACCG-1	327	Oligo NN	327 Oligo NN	31	OPC-Oligo	31 OPC-Oligo
12m_rep1	ACGCCTTTCATGCAAC-1	327	Oligo NN	327 Oligo NN	31	OPC-Oligo	31 OPC-Oligo
12m_rep1	ACGCCTTTCCCGCAAA-1	319	Astro-TE NN	319 Astro-TE NN	30	Astro-Epen	30 Astro-Epen
12m_rep1	ACGCCTTTCCTCCCTC-1	16	CA1-ProS Glut	016 CA1-ProS Glut	1	IT-ET Glut	01 IT-ET Glut
12m_rep1	ACGCCTTTCGTGCTTC-1	138	PH Pitx2 Glut	138 PH Pitx2 Glut	14	HY Glut	14 HY Glut
12m_rep1	ACGCCTTTCTCACAAA-1	213	SCsg Gabrr2 Gaba	213 SCsg Gabrr2 Gaba	20	MB GABA	20 MB GABA
12m_rep1	ACGCTTGAGGAGGCAT-1	195	SNr-VTA Pax5 Npas1 Gaba	195 SNr-VTA Pax5 Npas1 Gaba	20	MB GABA	20 MB GABA
12m_rep1	ACGCTTGAGGGATTAG-1	195	SNr-VTA Pax5 Npas1 Gaba	195 SNr-VTA Pax5 Npas1 Gaba	20	MB GABA	20 MB GABA
12m_rep1	ACGCTTGAGTATCGCG-1	327	Oligo NN	327 Oligo NN	31	OPC-Oligo	31 OPC-Oligo
12m_rep1	ACGGGAAGTTAGACCA-1	135	STN-PSTN Pitx2 Glut	135 STN-PSTN Pitx2 Glut	14	HY Glut	14 HY Glut
12m_rep1	ACGGGAAGTTAGGACC-1	327	Oligo NN	327 Oligo NN	31	OPC-Oligo	31 OPC-Oligo
12m_rep1	ACGGGAAGTTGTTCAC-1	327	Oligo NN	327 Oligo NN	31	OPC-Oligo	31 OPC-Oligo
12m_rep1	ACGGTACGTACCGTTT-1	138	PH Pitx2 Glut	138 PH Pitx2 Glut	14	HY Glut	14 HY Glut
12m_rep1	ACGGTACGTCTTGCAT-1	327	Oligo NN	327 Oligo NN	31	OPC-Oligo	31 OPC-Oligo
12m_rep1	ACGGTTAGTAACTACG-1	16	CA1-ProS Glut	016 CA1-ProS Glut	1	IT-ET Glut	01 IT-ET Glut
12m_rep1	ACGGTTAGTCATAACG-1	197	SNr Six3 Gaba	197 SNr Six3 Gaba	20	MB GABA	20 MB GABA
12m_rep1	ACGGTTAGTCCTAAGA-1	327	Oligo NN	327 Oligo NN	31	OPC-Oligo	31 OPC-Oligo
12m_rep1	ACGGTTAGTTGTTCAC-1	327	Oligo NN	327 Oligo NN	31	OPC-Oligo	31 OPC-Oligo
12m_rep1	ACGGTTTAGCACCACA-1	197	SNr Six3 Gaba	197 SNr Six3 Gaba	20	MB GABA	20 MB GABA
12m_rep1	ACGGTTTAGCACTAGT-1	101	ZI Pax6 Gaba	101 ZI Pax6 Gaba	12	HY GABA	12 HY GABA
12m_rep1	ACGGTTTAGCTGCACA-1	138	PH Pitx2 Glut	138 PH Pitx2 Glut	14	HY Glut	14 HY Glut
12m_rep1	ACGGTTTAGCTTCTCA-1	327	Oligo NN	327 Oligo NN	31	OPC-Oligo	31 OPC-Oligo
12m_rep1	ACGGTTTAGGCTAAGA-1	101	ZI Pax6 Gaba	101 ZI Pax6 Gaba	12	HY GABA	12 HY GABA
12m_rep1	ACGGTTTAGGCTTAAC-1	197	SNr Six3 Gaba	197 SNr Six3 Gaba	20	MB GABA	20 MB GABA
12m_rep1	ACGGTTTAGTACCGCA-1	327	Oligo NN	327 Oligo NN	31	OPC-Oligo	31 OPC-Oligo
12m_rep1	ACGTACCCACCTACGG-1	135	STN-PSTN Pitx2 Glut	135 STN-PSTN Pitx2 Glut	14	HY Glut	14 HY Glut
12m_rep1	ACGTACCCACTATGGC-1	327	Oligo NN	327 Oligo NN	31	OPC-Oligo	31 OPC-Oligo
12m_rep1	ACGTCAAGTAATCCCT-1	327	Oligo NN	327 Oligo NN	31	OPC-Oligo	31 OPC-Oligo
12m_rep1	ACGTCAAGTGAGCAAG-1	327	Oligo NN	327 Oligo NN	31	OPC-Oligo	31 OPC-Oligo
12m_rep1	ACGTCAAGTGATGATT-1	16	CA1-ProS Glut	016 CA1-ProS Glut	1	IT-ET Glut	01 IT-ET Glut
12m_rep1	ACGTCAAGTTCACCCA-1	327	Oligo NN	327 Oligo NN	31	OPC-Oligo	31 OPC-Oligo
12m_rep1	ACGTCCAAGCTCAAAC-1	327	Oligo NN	327 Oligo NN	31	OPC-Oligo	31 OPC-Oligo
12m_rep1	ACGTCCAAGCTTAGCG-1	327	Oligo NN	327 Oligo NN	31	OPC-Oligo	31 OPC-Oligo
12m_rep1	ACGTCCAAGGAACACA-1	327	Oligo NN	327 Oligo NN	31	OPC-Oligo	31 OPC-Oligo
12m_rep1	ACGTCCAAGTGAAGTG-1	135	STN-PSTN Pitx2 Glut	135 STN-PSTN Pitx2 Glut	14	HY Glut	14 HY Glut
12m_rep1	ACGTCCTTCCAAATCA-1	16	CA1-ProS Glut	016 CA1-ProS Glut	1	IT-ET Glut	01 IT-ET Glut
12m_rep1	ACGTCCTTCCGGCTAA-1	141	PH-SUM Foxa1 Glut	141 PH-SUM Foxa1 Glut	14	HY Glut	14 HY Glut
12m_rep1	ACGTCCTTCCTTAATC-1	327	Oligo NN	327 Oligo NN	31	OPC-Oligo	31 OPC-Oligo
12m_rep1	ACGTCCTTCGATATTG-1	327	Oligo NN	327 Oligo NN	31	OPC-Oligo	31 OPC-Oligo
12m_rep1	ACGTCCTTCGGGATTT-1	327	Oligo NN	327 Oligo NN	31	OPC-Oligo	31 OPC-Oligo
12m_rep1	ACGTTACAGCTTAACA-1	327	Oligo NN	327 Oligo NN	31	OPC-Oligo	31 OPC-Oligo
12m_rep1	ACGTTACAGCTTCTCA-1	16	CA1-ProS Glut	016 CA1-ProS Glut	1	IT-ET Glut	01 IT-ET Glut
12m_rep1	ACGTTACAGGACAACA-1	327	Oligo NN	327 Oligo NN	31	OPC-Oligo	31 OPC-Oligo
12m_rep1	ACGTTACAGGCTAGAA-1	327	Oligo NN	327 Oligo NN	31	OPC-Oligo	31 OPC-Oligo
12m_rep1	ACGTTACAGGTGCTGC-1	327	Oligo NN	327 Oligo NN	31	OPC-Oligo	31 OPC-Oligo
12m_rep1	ACGTTACAGTAGGCGG-1	197	SNr Six3 Gaba	197 SNr Six3 Gaba	20	MB GABA	20 MB GABA
12m_rep1	ACGTTGTAGCAAGGTA-1	197	SNr Six3 Gaba	197 SNr Six3 Gaba	20	MB GABA	20 MB GABA
12m_rep1	ACGTTGTAGTTAACCA-1	101	ZI Pax6 Gaba	101 ZI Pax6 Gaba	12	HY GABA	12 HY GABA
12m_rep1	ACTAAAGCAAATGCCC-1	16	CA1-ProS Glut	016 CA1-ProS Glut	1	IT-ET Glut	01 IT-ET Glut
12m_rep1	ACTAAAGCACAACAGG-1	327	Oligo NN	327 Oligo NN	31	OPC-Oligo	31 OPC-Oligo
12m_rep1	ACTAAAGCACTGGCTG-1	327	Oligo NN	327 Oligo NN	31	OPC-Oligo	31 OPC-Oligo
12m_rep1	ACTAACCAGATTGAGG-1	318	Astro-NT NN	318 Astro-NT NN	30	Astro-Epen	30 Astro-Epen
12m_rep1	ACTAACCAGCAATAGG-1	327	Oligo NN	327 Oligo NN	31	OPC-Oligo	31 OPC-Oligo
12m_rep1	ACTAACCAGCACGATT-1	327	Oligo NN	327 Oligo NN	31	OPC-Oligo	31 OPC-Oligo
12m_rep1	ACTAACCAGGAACGGT-1	327	Oligo NN	327 Oligo NN	31	OPC-Oligo	31 OPC-Oligo
12m_rep1	ACTAACCAGGGTGAGT-1	327	Oligo NN	327 Oligo NN	31	OPC-Oligo	31 OPC-Oligo
12m_rep1	ACTAACGGTAATCGTG-1	135	STN-PSTN Pitx2 Glut	135 STN-PSTN Pitx2 Glut	14	HY Glut	14 HY Glut
12m_rep1	ACTAACGGTCCTTCAG-1	327	Oligo NN	327 Oligo NN	31	OPC-Oligo	31 OPC-Oligo
12m_rep1	ACTAACGGTGCTCACC-1	327	Oligo NN	327 Oligo NN	31	OPC-Oligo	31 OPC-Oligo
12m_rep1	ACTAACGGTTAGGTGC-1	135	STN-PSTN Pitx2 Glut	135 STN-PSTN Pitx2 Glut	14	HY Glut	14 HY Glut
12m_rep1	ACTAACGGTTGCGGAT-1	327	Oligo NN	327 Oligo NN	31	OPC-Oligo	31 OPC-Oligo
12m_rep1	ACTAACGGTTGTAAAC-1	327	Oligo NN	327 Oligo NN	31	OPC-Oligo	31 OPC-Oligo
12m_rep1	ACTAACTCAACCCTCC-1	327	Oligo NN	327 Oligo NN	31	OPC-Oligo	31 OPC-Oligo
12m_rep1	ACTAACTCACCTAATG-1	197	SNr Six3 Gaba	197 SNr Six3 Gaba	20	MB GABA	20 MB GABA
12m_rep1	ACTAACTCACTCAACA-1	334	Microglia NN	334 Microglia NN	34	Immune	34 Immune
12m_rep1	ACTAACTCACTTAACG-1	16	CA1-ProS Glut	016 CA1-ProS Glut	1	IT-ET Glut	01 IT-ET Glut
12m_rep1	ACTAACTCATTGCGTA-1	93	RT-ZI Gnb3 Gaba	093 RT-ZI Gnb3 Gaba	12	HY GABA	12 HY GABA
12m_rep1	ACTAATCCAACACTTG-1	327	Oligo NN	327 Oligo NN	31	OPC-Oligo	31 OPC-Oligo
12m_rep1	ACTAATCCACATACTG-1	327	Oligo NN	327 Oligo NN	31	OPC-Oligo	31 OPC-Oligo
12m_rep1	ACTAATCCACGTAATT-1	327	Oligo NN	327 Oligo NN	31	OPC-Oligo	31 OPC-Oligo
12m_rep1	ACTAATCCAGTAAAGC-1	326	OPC NN	326 OPC NN	31	OPC-Oligo	31 OPC-Oligo
12m_rep1	ACTAGGCGTGCTAGCG-1	16	CA1-ProS Glut	016 CA1-ProS Glut	1	IT-ET Glut	01 IT-ET Glut
12m_rep1	ACTAGGCGTTCAAGCA-1	327	Oligo NN	327 Oligo NN	31	OPC-Oligo	31 OPC-Oligo
12m_rep1	ACTAGGCGTTTCGCGC-1	16	CA1-ProS Glut	016 CA1-ProS Glut	1	IT-ET Glut	01 IT-ET Glut
12m_rep1	ACTATCCGTCCTTTAA-1	327	Oligo NN	327 Oligo NN	31	OPC-Oligo	31 OPC-Oligo
12m_rep1	ACTATCCGTCTATCGT-1	327	Oligo NN	327 Oligo NN	31	OPC-Oligo	31 OPC-Oligo
12m_rep1	ACTATCCGTGTTTGCT-1	139	PH-LHA Foxb1 Glut	139 PH-LHA Foxb1 Glut	14	HY Glut	14 HY Glut
12m_rep1	ACTATCCGTTAGCAGC-1	197	SNr Six3 Gaba	197 SNr Six3 Gaba	20	MB GABA	20 MB GABA
12m_rep1	ACTATGTCAATGCCCG-1	327	Oligo NN	327 Oligo NN	31	OPC-Oligo	31 OPC-Oligo
12m_rep1	ACTATGTCAATTAAGG-1	327	Oligo NN	327 Oligo NN	31	OPC-Oligo	31 OPC-Oligo
12m_rep1	ACTATGTCACCGGTAT-1	327	Oligo NN	327 Oligo NN	31	OPC-Oligo	31 OPC-Oligo
12m_rep1	ACTATGTCAGAAATGC-1	318	Astro-NT NN	318 Astro-NT NN	30	Astro-Epen	30 Astro-Epen
12m_rep1	ACTATGTCAGGCCAAA-1	16	CA1-ProS Glut	016 CA1-ProS Glut	1	IT-ET Glut	01 IT-ET Glut
12m_rep1	ACTATGTCATGCTATG-1	327	Oligo NN	327 Oligo NN	31	OPC-Oligo	31 OPC-Oligo
12m_rep1	ACTATGTCATGCTTAG-1	135	STN-PSTN Pitx2 Glut	135 STN-PSTN Pitx2 Glut	14	HY Glut	14 HY Glut
12m_rep1	ACTATGTCATGTTGTG-1	327	Oligo NN	327 Oligo NN	31	OPC-Oligo	31 OPC-Oligo
12m_rep1	ACTCACCTCAATGACC-1	138	PH Pitx2 Glut	138 PH Pitx2 Glut	14	HY Glut	14 HY Glut
12m_rep1	ACTCACCTCCAGCACA-1	135	STN-PSTN Pitx2 Glut	135 STN-PSTN Pitx2 Glut	14	HY Glut	14 HY Glut
12m_rep1	ACTCACCTCCCGAAGC-1	327	Oligo NN	327 Oligo NN	31	OPC-Oligo	31 OPC-Oligo
12m_rep1	ACTCACCTCCTTAGGG-1	327	Oligo NN	327 Oligo NN	31	OPC-Oligo	31 OPC-Oligo
12m_rep1	ACTCACCTCCTTGTTG-1	327	Oligo NN	327 Oligo NN	31	OPC-Oligo	31 OPC-Oligo
12m_rep1	ACTCACCTCGTCCTTA-1	327	Oligo NN	327 Oligo NN	31	OPC-Oligo	31 OPC-Oligo
12m_rep1	ACTCACCTCTAAATCG-1	327	Oligo NN	327 Oligo NN	31	OPC-Oligo	31 OPC-Oligo
12m_rep1	ACTCACCTCTATCGCC-1	327	Oligo NN	327 Oligo NN	31	OPC-Oligo	31 OPC-Oligo
12m_rep1	ACTCACTGTAATCGCA-1	16	CA1-ProS Glut	016 CA1-ProS Glut	1	IT-ET Glut	01 IT-ET Glut
12m_rep1	ACTCACTGTCGTAAAT-1	327	Oligo NN	327 Oligo NN	31	OPC-Oligo	31 OPC-Oligo
12m_rep1	ACTCACTGTGTGTCCC-1	327	Oligo NN	327 Oligo NN	31	OPC-Oligo	31 OPC-Oligo
12m_rep1	ACTCACTGTTGCCTCA-1	327	Oligo NN	327 Oligo NN	31	OPC-Oligo	31 OPC-Oligo
12m_rep1	ACTCAGTAGTCACGAT-1	327	Oligo NN	327 Oligo NN	31	OPC-Oligo	31 OPC-Oligo
12m_rep1	ACTCCTCAGCAAACCT-1	327	Oligo NN	327 Oligo NN	31	OPC-Oligo	31 OPC-Oligo
12m_rep1	ACTCCTCAGCGCCTTT-1	327	Oligo NN	327 Oligo NN	31	OPC-Oligo	31 OPC-Oligo
12m_rep1	ACTCCTCAGGAATAAC-1	327	Oligo NN	327 Oligo NN	31	OPC-Oligo	31 OPC-Oligo
12m_rep1	ACTCCTCAGGCTTAGT-1	327	Oligo NN	327 Oligo NN	31	OPC-Oligo	31 OPC-Oligo
12m_rep1	ACTCCTCAGGGTTATC-1	327	Oligo NN	327 Oligo NN	31	OPC-Oligo	31 OPC-Oligo
12m_rep1	ACTCCTCAGTTAACCA-1	327	Oligo NN	327 Oligo NN	31	OPC-Oligo	31 OPC-Oligo
12m_rep1	ACTCCTCAGTTATTCC-1	197	SNr Six3 Gaba	197 SNr Six3 Gaba	20	MB GABA	20 MB GABA
12m_rep1	ACTCGCGCAGTTTGGC-1	16	CA1-ProS Glut	016 CA1-ProS Glut	1	IT-ET Glut	01 IT-ET Glut
12m_rep1	ACTCGCTTCGCTTGCT-1	327	Oligo NN	327 Oligo NN	31	OPC-Oligo	31 OPC-Oligo
12m_rep1	ACTGAAACAACTGGCT-1	327	Oligo NN	327 Oligo NN	31	OPC-Oligo	31 OPC-Oligo
12m_rep1	ACTGAAACACAACCTA-1	327	Oligo NN	327 Oligo NN	31	OPC-Oligo	31 OPC-Oligo
12m_rep1	ACTGAAACACGAATCC-1	327	Oligo NN	327 Oligo NN	31	OPC-Oligo	31 OPC-Oligo
12m_rep1	ACTGAAACACGTGCTG-1	318	Astro-NT NN	318 Astro-NT NN	30	Astro-Epen	30 Astro-Epen
12m_rep1	ACTGAAACAGCAAATA-1	327	Oligo NN	327 Oligo NN	31	OPC-Oligo	31 OPC-Oligo
12m_rep1	ACTGAAACAGGATGGC-1	327	Oligo NN	327 Oligo NN	31	OPC-Oligo	31 OPC-Oligo
12m_rep1	ACTGAAACAGGTTAAA-1	166	MRN Pou3f1 C1ql4 Glut	166 MRN Pou3f1 C1ql4 Glut	19	MB Glut	19 MB Glut
12m_rep1	ACTGAATGTGGACATC-1	135	STN-PSTN Pitx2 Glut	135 STN-PSTN Pitx2 Glut	14	HY Glut	14 HY Glut
12m_rep1	ACTTACAAGCCGCTAA-1	138	PH Pitx2 Glut	138 PH Pitx2 Glut	14	HY Glut	14 HY Glut
12m_rep1	ACTTACAAGCTAATTG-1	327	Oligo NN	327 Oligo NN	31	OPC-Oligo	31 OPC-Oligo
12m_rep1	ACTTACAAGGAACACA-1	327	Oligo NN	327 Oligo NN	31	OPC-Oligo	31 OPC-Oligo
12m_rep1	ACTTACAAGGCGAAAC-1	327	Oligo NN	327 Oligo NN	31	OPC-Oligo	31 OPC-Oligo
12m_rep1	ACTTACTTCAGTGAAG-1	156	MB-ant-ve Dmrta2 Glut	156 MB-ant-ve Dmrta2 Glut	19	MB Glut	19 MB Glut
12m_rep1	ACTTACTTCATTATGG-1	327	Oligo NN	327 Oligo NN	31	OPC-Oligo	31 OPC-Oligo
12m_rep1	ACTTACTTCGCGCTAA-1	327	Oligo NN	327 Oligo NN	31	OPC-Oligo	31 OPC-Oligo
12m_rep1	ACTTACTTCTCCATAT-1	327	Oligo NN	327 Oligo NN	31	OPC-Oligo	31 OPC-Oligo
12m_rep1	ACTTACTTCTGGTCCT-1	16	CA1-ProS Glut	016 CA1-ProS Glut	1	IT-ET Glut	01 IT-ET Glut
12m_rep1	ACTTAGGGTAACCTAG-1	327	Oligo NN	327 Oligo NN	31	OPC-Oligo	31 OPC-Oligo
12m_rep1	ACTTAGGGTAGTAAGA-1	197	SNr Six3 Gaba	197 SNr Six3 Gaba	20	MB GABA	20 MB GABA
12m_rep1	ACTTAGTCACATAGCC-1	139	PH-LHA Foxb1 Glut	139 PH-LHA Foxb1 Glut	14	HY Glut	14 HY Glut
12m_rep1	ACTTAGTCACCTACGG-1	327	Oligo NN	327 Oligo NN	31	OPC-Oligo	31 OPC-Oligo
12m_rep1	ACTTAGTCAGCAAGTG-1	318	Astro-NT NN	318 Astro-NT NN	30	Astro-Epen	30 Astro-Epen
12m_rep1	ACTTAGTCAGGCTAGA-1	327	Oligo NN	327 Oligo NN	31	OPC-Oligo	31 OPC-Oligo
12m_rep1	ACTTAGTCATAAGCAA-1	327	Oligo NN	327 Oligo NN	31	OPC-Oligo	31 OPC-Oligo
12m_rep1	ACTTAGTCATAATGTC-1	327	Oligo NN	327 Oligo NN	31	OPC-Oligo	31 OPC-Oligo
12m_rep1	ACTTAGTCATTTGCTC-1	330	VLMC NN	330 VLMC NN	33	Vascular	33 Vascular
12m_rep1	ACTTATCTCAAGTGTC-1	327	Oligo NN	327 Oligo NN	31	OPC-Oligo	31 OPC-Oligo
12m_rep1	ACTTATCTCGGTCAAT-1	135	STN-PSTN Pitx2 Glut	135 STN-PSTN Pitx2 Glut	14	HY Glut	14 HY Glut
12m_rep1	ACTTATCTCGTTAAGC-1	327	Oligo NN	327 Oligo NN	31	OPC-Oligo	31 OPC-Oligo
12m_rep1	ACTTATCTCTAGCTAA-1	327	Oligo NN	327 Oligo NN	31	OPC-Oligo	31 OPC-Oligo
12m_rep1	ACTTATCTCTGCAACG-1	327	Oligo NN	327 Oligo NN	31	OPC-Oligo	31 OPC-Oligo
12m_rep1	ACTTATGAGAATGACG-1	327	Oligo NN	327 Oligo NN	31	OPC-Oligo	31 OPC-Oligo
12m_rep1	ACTTATGAGCAGGCCT-1	168	SPA-SPFm-SPFp-POL-PIL-PoT Sp9 Glut	168 SPA-SPFm-SPFp-POL-PIL-PoT Sp9 Glut	19	MB Glut	19 MB Glut
12m_rep1	ACTTATGAGGAACCGG-1	327	Oligo NN	327 Oligo NN	31	OPC-Oligo	31 OPC-Oligo
12m_rep1	ACTTATGAGTATTGGC-1	327	Oligo NN	327 Oligo NN	31	OPC-Oligo	31 OPC-Oligo
12m_rep1	ACTTATGAGTTCCCGT-1	135	STN-PSTN Pitx2 Glut	135 STN-PSTN Pitx2 Glut	14	HY Glut	14 HY Glut
12m_rep1	ACTTCGCTCGGCCAGT-1	327	Oligo NN	327 Oligo NN	31	OPC-Oligo	31 OPC-Oligo
12m_rep1	ACTTCGCTCTAGCTTT-1	327	Oligo NN	327 Oligo NN	31	OPC-Oligo	31 OPC-Oligo
12m_rep1	ACTTGAATCACAAGCT-1	327	Oligo NN	327 Oligo NN	31	OPC-Oligo	31 OPC-Oligo
12m_rep1	ACTTGAATCACACAGT-1	327	Oligo NN	327 Oligo NN	31	OPC-Oligo	31 OPC-Oligo
12m_rep1	ACTTGAATCAGGTCCA-1	327	Oligo NN	327 Oligo NN	31	OPC-Oligo	31 OPC-Oligo
12m_rep1	ACTTGCACAATAGCAA-1	16	CA1-ProS Glut	016 CA1-ProS Glut	1	IT-ET Glut	01 IT-ET Glut
12m_rep1	ACTTGCACACAAAGGT-1	327	Oligo NN	327 Oligo NN	31	OPC-Oligo	31 OPC-Oligo
12m_rep1	ACTTGCACAGCTTAAT-1	327	Oligo NN	327 Oligo NN	31	OPC-Oligo	31 OPC-Oligo
12m_rep1	ACTTGCACATACCCGG-1	16	CA1-ProS Glut	016 CA1-ProS Glut	1	IT-ET Glut	01 IT-ET Glut
12m_rep1	ACTTGTCGTAAGGTCC-1	93	RT-ZI Gnb3 Gaba	093 RT-ZI Gnb3 Gaba	12	HY GABA	12 HY GABA
12m_rep1	ACTTGTCGTCGTAATG-1	135	STN-PSTN Pitx2 Glut	135 STN-PSTN Pitx2 Glut	14	HY Glut	14 HY Glut
12m_rep1	ACTTGTCGTTACTTGC-1	327	Oligo NN	327 Oligo NN	31	OPC-Oligo	31 OPC-Oligo
12m_rep1	ACTTGTCGTTAGCGTA-1	327	Oligo NN	327 Oligo NN	31	OPC-Oligo	31 OPC-Oligo
12m_rep1	ACTTGTCGTTGTTGCT-1	135	STN-PSTN Pitx2 Glut	135 STN-PSTN Pitx2 Glut	14	HY Glut	14 HY Glut
12m_rep1	ACTTTGTTCAGCTAAC-1	327	Oligo NN	327 Oligo NN	31	OPC-Oligo	31 OPC-Oligo
12m_rep1	ACTTTGTTCAGGTCCA-1	197	SNr Six3 Gaba	197 SNr Six3 Gaba	20	MB GABA	20 MB GABA
12m_rep1	ACTTTGTTCCAAACAC-1	197	SNr Six3 Gaba	197 SNr Six3 Gaba	20	MB GABA	20 MB GABA
12m_rep1	ACTTTGTTCCAACTGG-1	166	MRN Pou3f1 C1ql4 Glut	166 MRN Pou3f1 C1ql4 Glut	19	MB Glut	19 MB Glut
12m_rep1	ACTTTGTTCTACCTGC-1	327	Oligo NN	327 Oligo NN	31	OPC-Oligo	31 OPC-Oligo
12m_rep1	ACTTTGTTCTGTTGCC-1	319	Astro-TE NN	319 Astro-TE NN	30	Astro-Epen	30 Astro-Epen
12m_rep1	ACTTTGTTCTTAGGGT-1	327	Oligo NN	327 Oligo NN	31	OPC-Oligo	31 OPC-Oligo
12m_rep1	AGAAACCCACAGGAAT-1	327	Oligo NN	327 Oligo NN	31	OPC-Oligo	31 OPC-Oligo
12m_rep1	AGAAACCCATCACTTC-1	197	SNr Six3 Gaba	197 SNr Six3 Gaba	20	MB GABA	20 MB GABA
12m_rep1	AGAAACCCATGAATCT-1	93	RT-ZI Gnb3 Gaba	093 RT-ZI Gnb3 Gaba	12	HY GABA	12 HY GABA
12m_rep1	AGAAACTAGACACCGC-1	138	PH Pitx2 Glut	138 PH Pitx2 Glut	14	HY Glut	14 HY Glut
12m_rep1	AGAAACTAGCTAAGTC-1	327	Oligo NN	327 Oligo NN	31	OPC-Oligo	31 OPC-Oligo
12m_rep1	AGAAACTAGCTAATTG-1	135	STN-PSTN Pitx2 Glut	135 STN-PSTN Pitx2 Glut	14	HY Glut	14 HY Glut
12m_rep1	AGAAACTAGGAACGCG-1	166	MRN Pou3f1 C1ql4 Glut	166 MRN Pou3f1 C1ql4 Glut	19	MB Glut	19 MB Glut
12m_rep1	AGAAAGGCAATAGCAA-1	197	SNr Six3 Gaba	197 SNr Six3 Gaba	20	MB GABA	20 MB GABA
12m_rep1	AGAAAGGCAGCACGTT-1	139	PH-LHA Foxb1 Glut	139 PH-LHA Foxb1 Glut	14	HY Glut	14 HY Glut
12m_rep1	AGAACAAGTAATGGAA-1	327	Oligo NN	327 Oligo NN	31	OPC-Oligo	31 OPC-Oligo
12m_rep1	AGAACAAGTCACCTAT-1	197	SNr Six3 Gaba	197 SNr Six3 Gaba	20	MB GABA	20 MB GABA
12m_rep1	AGAACAAGTCACGGAT-1	327	Oligo NN	327 Oligo NN	31	OPC-Oligo	31 OPC-Oligo
12m_rep1	AGAACAAGTCATGAGC-1	326	OPC NN	326 OPC NN	31	OPC-Oligo	31 OPC-Oligo
12m_rep1	AGAACAAGTCTTGCAT-1	135	STN-PSTN Pitx2 Glut	135 STN-PSTN Pitx2 Glut	14	HY Glut	14 HY Glut
12m_rep1	AGAACCAAGCCACATG-1	327	Oligo NN	327 Oligo NN	31	OPC-Oligo	31 OPC-Oligo
12m_rep1	AGAACCAAGGACCTCA-1	327	Oligo NN	327 Oligo NN	31	OPC-Oligo	31 OPC-Oligo
12m_rep1	AGAACCAAGGCCGGAA-1	16	CA1-ProS Glut	016 CA1-ProS Glut	1	IT-ET Glut	01 IT-ET Glut
12m_rep1	AGAACCAAGGGCCACT-1	334	Microglia NN	334 Microglia NN	34	Immune	34 Immune
12m_rep1	AGAACCAAGTGAAGTG-1	197	SNr Six3 Gaba	197 SNr Six3 Gaba	20	MB GABA	20 MB GABA
12m_rep1	AGAACCAAGTGCTGTG-1	197	SNr Six3 Gaba	197 SNr Six3 Gaba	20	MB GABA	20 MB GABA
12m_rep1	AGAACCAAGTTCCTCA-1	327	Oligo NN	327 Oligo NN	31	OPC-Oligo	31 OPC-Oligo
12m_rep1	AGAACCGCACAATGCC-1	197	SNr Six3 Gaba	197 SNr Six3 Gaba	20	MB GABA	20 MB GABA
12m_rep1	AGAACCGCACCTAATG-1	327	Oligo NN	327 Oligo NN	31	OPC-Oligo	31 OPC-Oligo
12m_rep1	AGAACCGCACCTATAG-1	327	Oligo NN	327 Oligo NN	31	OPC-Oligo	31 OPC-Oligo
12m_rep1	AGAACCGCAGGATTAA-1	138	PH Pitx2 Glut	138 PH Pitx2 Glut	14	HY Glut	14 HY Glut
12m_rep1	AGAACCGCATATTGAC-1	326	OPC NN	326 OPC NN	31	OPC-Oligo	31 OPC-Oligo
12m_rep1	AGAAGGTGTACCAGGT-1	327	Oligo NN	327 Oligo NN	31	OPC-Oligo	31 OPC-Oligo
12m_rep1	AGAAGGTGTCGACTAA-1	326	OPC NN	326 OPC NN	31	OPC-Oligo	31 OPC-Oligo
12m_rep1	AGAAGGTGTTGACTTC-1	327	Oligo NN	327 Oligo NN	31	OPC-Oligo	31 OPC-Oligo
12m_rep1	AGAATCGAGACTATTG-1	327	Oligo NN	327 Oligo NN	31	OPC-Oligo	31 OPC-Oligo
12m_rep1	AGAATCGAGGAGCACG-1	16	CA1-ProS Glut	016 CA1-ProS Glut	1	IT-ET Glut	01 IT-ET Glut
12m_rep1	AGAATCGAGGCGAATA-1	327	Oligo NN	327 Oligo NN	31	OPC-Oligo	31 OPC-Oligo
12m_rep1	AGAATCGAGGCTAGAA-1	327	Oligo NN	327 Oligo NN	31	OPC-Oligo	31 OPC-Oligo
12m_rep1	AGAATCGAGGGCCACT-1	16	CA1-ProS Glut	016 CA1-ProS Glut	1	IT-ET Glut	01 IT-ET Glut
12m_rep1	AGAATCGAGGGCTAAA-1	327	Oligo NN	327 Oligo NN	31	OPC-Oligo	31 OPC-Oligo
12m_rep1	AGAATCGAGGTAACGA-1	327	Oligo NN	327 Oligo NN	31	OPC-Oligo	31 OPC-Oligo
12m_rep1	AGAATCTGTCACACCC-1	327	Oligo NN	327 Oligo NN	31	OPC-Oligo	31 OPC-Oligo
12m_rep1	AGAATCTGTGCAATGC-1	197	SNr Six3 Gaba	197 SNr Six3 Gaba	20	MB GABA	20 MB GABA
12m_rep1	AGAATCTGTGCTGGTG-1	139	PH-LHA Foxb1 Glut	139 PH-LHA Foxb1 Glut	14	HY Glut	14 HY Glut
12m_rep1	AGAATCTGTGGATTCA-1	327	Oligo NN	327 Oligo NN	31	OPC-Oligo	31 OPC-Oligo
12m_rep1	AGAATCTGTTGCACGG-1	334	Microglia NN	334 Microglia NN	34	Immune	34 Immune
12m_rep1	AGACAATAGCAAGGGT-1	327	Oligo NN	327 Oligo NN	31	OPC-Oligo	31 OPC-Oligo
12m_rep1	AGACACGCACAGGGAC-1	327	Oligo NN	327 Oligo NN	31	OPC-Oligo	31 OPC-Oligo
12m_rep1	AGACACGCACCCTCAC-1	327	Oligo NN	327 Oligo NN	31	OPC-Oligo	31 OPC-Oligo
12m_rep1	AGACACGCAGAACCGA-1	318	Astro-NT NN	318 Astro-NT NN	30	Astro-Epen	30 Astro-Epen
12m_rep1	AGACACGCAGTAAAGC-1	197	SNr Six3 Gaba	197 SNr Six3 Gaba	20	MB GABA	20 MB GABA
12m_rep1	AGACACGCAGTAAGTA-1	197	SNr Six3 Gaba	197 SNr Six3 Gaba	20	MB GABA	20 MB GABA
12m_rep1	AGACACGCAGTGAACG-1	327	Oligo NN	327 Oligo NN	31	OPC-Oligo	31 OPC-Oligo
12m_rep1	AGACACGCATAGCGGA-1	327	Oligo NN	327 Oligo NN	31	OPC-Oligo	31 OPC-Oligo
12m_rep1	AGACCCGGTCCGCTGT-1	327	Oligo NN	327 Oligo NN	31	OPC-Oligo	31 OPC-Oligo
12m_rep1	AGACCCGGTGGATTGC-1	327	Oligo NN	327 Oligo NN	31	OPC-Oligo	31 OPC-Oligo
12m_rep1	AGACCCGGTGTTGCTT-1	138	PH Pitx2 Glut	138 PH Pitx2 Glut	14	HY Glut	14 HY Glut
12m_rep1	AGACTATGTAGCTGGT-1	327	Oligo NN	327 Oligo NN	31	OPC-Oligo	31 OPC-Oligo
12m_rep1	AGACTATGTCAATGTG-1	327	Oligo NN	327 Oligo NN	31	OPC-Oligo	31 OPC-Oligo
12m_rep1	AGACTATGTTTAAAGC-1	327	Oligo NN	327 Oligo NN	31	OPC-Oligo	31 OPC-Oligo
12m_rep1	AGAGAAGCAACCGCCA-1	93	RT-ZI Gnb3 Gaba	093 RT-ZI Gnb3 Gaba	12	HY GABA	12 HY GABA
12m_rep1	AGAGAAGCAATTGAGA-1	327	Oligo NN	327 Oligo NN	31	OPC-Oligo	31 OPC-Oligo
12m_rep1	AGAGAAGCACAACCTA-1	16	CA1-ProS Glut	016 CA1-ProS Glut	1	IT-ET Glut	01 IT-ET Glut
12m_rep1	AGAGAAGCACTAGGTC-1	16	CA1-ProS Glut	016 CA1-ProS Glut	1	IT-ET Glut	01 IT-ET Glut
12m_rep1	AGAGAAGCAGGACCAA-1	101	ZI Pax6 Gaba	101 ZI Pax6 Gaba	12	HY GABA	12 HY GABA
12m_rep1	AGAGAGGAGCCGCTTT-1	327	Oligo NN	327 Oligo NN	31	OPC-Oligo	31 OPC-Oligo
12m_rep1	AGAGAGGAGCGATAAG-1	135	STN-PSTN Pitx2 Glut	135 STN-PSTN Pitx2 Glut	14	HY Glut	14 HY Glut
12m_rep1	AGAGAGGAGGCGAATA-1	135	STN-PSTN Pitx2 Glut	135 STN-PSTN Pitx2 Glut	14	HY Glut	14 HY Glut
12m_rep1	AGAGAGGAGGCGCATC-1	135	STN-PSTN Pitx2 Glut	135 STN-PSTN Pitx2 Glut	14	HY Glut	14 HY Glut
12m_rep1	AGAGATTAGCATGGTT-1	327	Oligo NN	327 Oligo NN	31	OPC-Oligo	31 OPC-Oligo
12m_rep1	AGAGATTAGCCAAATC-1	327	Oligo NN	327 Oligo NN	31	OPC-Oligo	31 OPC-Oligo
12m_rep1	AGAGATTAGGAGGTTA-1	327	Oligo NN	327 Oligo NN	31	OPC-Oligo	31 OPC-Oligo
12m_rep1	AGAGATTAGGATGATG-1	327	Oligo NN	327 Oligo NN	31	OPC-Oligo	31 OPC-Oligo
12m_rep1	AGAGATTAGGCTAAGA-1	135	STN-PSTN Pitx2 Glut	135 STN-PSTN Pitx2 Glut	14	HY Glut	14 HY Glut
12m_rep1	AGAGATTAGGTTTGAC-1	16	CA1-ProS Glut	016 CA1-ProS Glut	1	IT-ET Glut	01 IT-ET Glut
12m_rep1	AGAGATTAGTAGAGGC-1	327	Oligo NN	327 Oligo NN	31	OPC-Oligo	31 OPC-Oligo
12m_rep1	AGAGATTAGTTACCGG-1	166	MRN Pou3f1 C1ql4 Glut	166 MRN Pou3f1 C1ql4 Glut	19	MB Glut	19 MB Glut
12m_rep1	AGAGGAACAACCGCCA-1	166	MRN Pou3f1 C1ql4 Glut	166 MRN Pou3f1 C1ql4 Glut	19	MB Glut	19 MB Glut
12m_rep1	AGAGGAACACAATTAC-1	327	Oligo NN	327 Oligo NN	31	OPC-Oligo	31 OPC-Oligo
12m_rep1	AGAGGATGTAAATTGC-1	327	Oligo NN	327 Oligo NN	31	OPC-Oligo	31 OPC-Oligo
12m_rep1	AGATGAAGTCATGCCC-1	327	Oligo NN	327 Oligo NN	31	OPC-Oligo	31 OPC-Oligo
12m_rep1	AGATGAAGTGACCTGG-1	327	Oligo NN	327 Oligo NN	31	OPC-Oligo	31 OPC-Oligo
12m_rep1	AGATGAAGTTTAAAGC-1	16	CA1-ProS Glut	016 CA1-ProS Glut	1	IT-ET Glut	01 IT-ET Glut
12m_rep1	AGATGCTTCAATACGC-1	326	OPC NN	326 OPC NN	31	OPC-Oligo	31 OPC-Oligo
12m_rep1	AGATGCTTCAGAAACG-1	327	Oligo NN	327 Oligo NN	31	OPC-Oligo	31 OPC-Oligo
12m_rep1	AGATGCTTCATAATCG-1	327	Oligo NN	327 Oligo NN	31	OPC-Oligo	31 OPC-Oligo
12m_rep1	AGATGCTTCCCGTTTA-1	327	Oligo NN	327 Oligo NN	31	OPC-Oligo	31 OPC-Oligo
12m_rep1	AGCAAATAGCACGATT-1	327	Oligo NN	327 Oligo NN	31	OPC-Oligo	31 OPC-Oligo
12m_rep1	AGCAAATAGCTCAATA-1	327	Oligo NN	327 Oligo NN	31	OPC-Oligo	31 OPC-Oligo
12m_rep1	AGCAAATAGGATTGAG-1	327	Oligo NN	327 Oligo NN	31	OPC-Oligo	31 OPC-Oligo
12m_rep1	AGCAAATAGGTATTGC-1	197	SNr Six3 Gaba	197 SNr Six3 Gaba	20	MB GABA	20 MB GABA
12m_rep1	AGCAACAAGGCTTAAC-1	327	Oligo NN	327 Oligo NN	31	OPC-Oligo	31 OPC-Oligo
12m_rep1	AGCAACAAGTAACAGG-1	327	Oligo NN	327 Oligo NN	31	OPC-Oligo	31 OPC-Oligo
12m_rep1	AGCAAGGGTAACGGGA-1	318	Astro-NT NN	318 Astro-NT NN	30	Astro-Epen	30 Astro-Epen
12m_rep1	AGCAATACAACCCTCC-1	327	Oligo NN	327 Oligo NN	31	OPC-Oligo	31 OPC-Oligo
12m_rep1	AGCAATACAAGACTCC-1	327	Oligo NN	327 Oligo NN	31	OPC-Oligo	31 OPC-Oligo
12m_rep1	AGCAATACATGAATCT-1	197	SNr Six3 Gaba	197 SNr Six3 Gaba	20	MB GABA	20 MB GABA
12m_rep1	AGCAATTGTAAGGTTT-1	16	CA1-ProS Glut	016 CA1-ProS Glut	1	IT-ET Glut	01 IT-ET Glut
12m_rep1	AGCAATTGTAAGTCGC-1	197	SNr Six3 Gaba	197 SNr Six3 Gaba	20	MB GABA	20 MB GABA
12m_rep1	AGCAATTGTGAACAAA-1	327	Oligo NN	327 Oligo NN	31	OPC-Oligo	31 OPC-Oligo
12m_rep1	AGCAATTGTGCCTCAC-1	327	Oligo NN	327 Oligo NN	31	OPC-Oligo	31 OPC-Oligo
12m_rep1	AGCAATTGTTAAGGTT-1	327	Oligo NN	327 Oligo NN	31	OPC-Oligo	31 OPC-Oligo
12m_rep1	AGCACAGCAGCCTGCA-1	327	Oligo NN	327 Oligo NN	31	OPC-Oligo	31 OPC-Oligo
12m_rep1	AGCACAGCAGCTAATT-1	327	Oligo NN	327 Oligo NN	31	OPC-Oligo	31 OPC-Oligo
12m_rep1	AGCACAGCAGCTTAAT-1	197	SNr Six3 Gaba	197 SNr Six3 Gaba	20	MB GABA	20 MB GABA
12m_rep1	AGCACAGCATGTTGCA-1	327	Oligo NN	327 Oligo NN	31	OPC-Oligo	31 OPC-Oligo
12m_rep1	AGCACAGCATTGCGTA-1	156	MB-ant-ve Dmrta2 Glut	156 MB-ant-ve Dmrta2 Glut	19	MB Glut	19 MB Glut
12m_rep1	AGCACTAGTACCGTTT-1	16	CA1-ProS Glut	016 CA1-ProS Glut	1	IT-ET Glut	01 IT-ET Glut
12m_rep1	AGCACTAGTAGCCTCC-1	93	RT-ZI Gnb3 Gaba	093 RT-ZI Gnb3 Gaba	12	HY GABA	12 HY GABA
12m_rep1	AGCACTAGTCAAGTAT-1	135	STN-PSTN Pitx2 Glut	135 STN-PSTN Pitx2 Glut	14	HY Glut	14 HY Glut
12m_rep1	AGCACTAGTCGTAAAT-1	135	STN-PSTN Pitx2 Glut	135 STN-PSTN Pitx2 Glut	14	HY Glut	14 HY Glut
12m_rep1	AGCACTAGTGCATTTC-1	16	CA1-ProS Glut	016 CA1-ProS Glut	1	IT-ET Glut	01 IT-ET Glut
12m_rep1	AGCACTAGTGTCCAAA-1	16	CA1-ProS Glut	016 CA1-ProS Glut	1	IT-ET Glut	01 IT-ET Glut
12m_rep1	AGCACTAGTTCCATTA-1	327	Oligo NN	327 Oligo NN	31	OPC-Oligo	31 OPC-Oligo
12m_rep1	AGCACTTAGGCCTTAG-1	135	STN-PSTN Pitx2 Glut	135 STN-PSTN Pitx2 Glut	14	HY Glut	14 HY Glut
12m_rep1	AGCACTTAGTAACGGA-1	16	CA1-ProS Glut	016 CA1-ProS Glut	1	IT-ET Glut	01 IT-ET Glut
12m_rep1	AGCAGGTAGAACAAGT-1	327	Oligo NN	327 Oligo NN	31	OPC-Oligo	31 OPC-Oligo
12m_rep1	AGCAGGTAGCAAGACA-1	197	SNr Six3 Gaba	197 SNr Six3 Gaba	20	MB GABA	20 MB GABA
12m_rep1	AGCAGGTAGGTTACAC-1	16	CA1-ProS Glut	016 CA1-ProS Glut	1	IT-ET Glut	01 IT-ET Glut
12m_rep1	AGCAGGTAGTCAGGCC-1	327	Oligo NN	327 Oligo NN	31	OPC-Oligo	31 OPC-Oligo
12m_rep1	AGCATCCCACTGACTA-1	327	Oligo NN	327 Oligo NN	31	OPC-Oligo	31 OPC-Oligo
12m_rep1	AGCATCCCAGTTAGCC-1	327	Oligo NN	327 Oligo NN	31	OPC-Oligo	31 OPC-Oligo
12m_rep1	AGCATCCCATAAGGAC-1	139	PH-LHA Foxb1 Glut	139 PH-LHA Foxb1 Glut	14	HY Glut	14 HY Glut
12m_rep1	AGCATTTCAAACCTTG-1	327	Oligo NN	327 Oligo NN	31	OPC-Oligo	31 OPC-Oligo
12m_rep1	AGCATTTCAAAGCGCA-1	197	SNr Six3 Gaba	197 SNr Six3 Gaba	20	MB GABA	20 MB GABA
12m_rep1	AGCATTTCACAGGGAC-1	327	Oligo NN	327 Oligo NN	31	OPC-Oligo	31 OPC-Oligo
12m_rep1	AGCATTTCAGCAACCT-1	327	Oligo NN	327 Oligo NN	31	OPC-Oligo	31 OPC-Oligo
12m_rep1	AGCATTTCAGCAGGTA-1	135	STN-PSTN Pitx2 Glut	135 STN-PSTN Pitx2 Glut	14	HY Glut	14 HY Glut
12m_rep1	AGCATTTCAGTCTAAT-1	165	PAG-MRN Pou3f1 Glut	165 PAG-MRN Pou3f1 Glut	19	MB Glut	19 MB Glut
12m_rep1	AGCATTTCATGGCCCA-1	165	PAG-MRN Pou3f1 Glut	165 PAG-MRN Pou3f1 Glut	19	MB Glut	19 MB Glut
12m_rep1	AGCATTTCATGTCAAT-1	197	SNr Six3 Gaba	197 SNr Six3 Gaba	20	MB GABA	20 MB GABA
12m_rep1	AGCATTTCATTGGGAG-1	138	PH Pitx2 Glut	138 PH Pitx2 Glut	14	HY Glut	14 HY Glut
12m_rep1	AGCCAGTGTAACCTAG-1	168	SPA-SPFm-SPFp-POL-PIL-PoT Sp9 Glut	168 SPA-SPFm-SPFp-POL-PIL-PoT Sp9 Glut	19	MB Glut	19 MB Glut
12m_rep1	AGCCAGTGTACCCACC-1	197	SNr Six3 Gaba	197 SNr Six3 Gaba	20	MB GABA	20 MB GABA
12m_rep1	AGCCAGTGTCTTTGAC-1	16	CA1-ProS Glut	016 CA1-ProS Glut	1	IT-ET Glut	01 IT-ET Glut
12m_rep1	AGCCAGTGTGACATGC-1	16	CA1-ProS Glut	016 CA1-ProS Glut	1	IT-ET Glut	01 IT-ET Glut
12m_rep1	AGCCGCTAGCACAGCC-1	327	Oligo NN	327 Oligo NN	31	OPC-Oligo	31 OPC-Oligo
12m_rep1	AGCCGCTAGCACTTGG-1	334	Microglia NN	334 Microglia NN	34	Immune	34 Immune
12m_rep1	AGCCGCTAGCGAGCGA-1	327	Oligo NN	327 Oligo NN	31	OPC-Oligo	31 OPC-Oligo
12m_rep1	AGCCGCTAGGAAACTG-1	166	MRN Pou3f1 C1ql4 Glut	166 MRN Pou3f1 C1ql4 Glut	19	MB Glut	19 MB Glut
12m_rep1	AGCCGCTAGGAAGCAC-1	327	Oligo NN	327 Oligo NN	31	OPC-Oligo	31 OPC-Oligo
12m_rep1	AGCCGCTAGGCATGTT-1	138	PH Pitx2 Glut	138 PH Pitx2 Glut	14	HY Glut	14 HY Glut
12m_rep1	AGCCGCTAGGCCATCA-1	327	Oligo NN	327 Oligo NN	31	OPC-Oligo	31 OPC-Oligo
12m_rep1	AGCCGCTAGGGTTAGA-1	327	Oligo NN	327 Oligo NN	31	OPC-Oligo	31 OPC-Oligo
12m_rep1	AGCCGCTAGGTAAGGC-1	327	Oligo NN	327 Oligo NN	31	OPC-Oligo	31 OPC-Oligo
12m_rep1	AGCCGCTAGTCACTAA-1	197	SNr Six3 Gaba	197 SNr Six3 Gaba	20	MB GABA	20 MB GABA
12m_rep1	AGCCGCTAGTTAGACC-1	327	Oligo NN	327 Oligo NN	31	OPC-Oligo	31 OPC-Oligo
12m_rep1	AGCCGCTAGTTTCCTG-1	327	Oligo NN	327 Oligo NN	31	OPC-Oligo	31 OPC-Oligo
12m_rep1	AGCCGGTTCAATGTCA-1	327	Oligo NN	327 Oligo NN	31	OPC-Oligo	31 OPC-Oligo
12m_rep1	AGCCGGTTCACCAATA-1	327	Oligo NN	327 Oligo NN	31	OPC-Oligo	31 OPC-Oligo
12m_rep1	AGCCGGTTCCTAATGA-1	327	Oligo NN	327 Oligo NN	31	OPC-Oligo	31 OPC-Oligo
12m_rep1	AGCCGGTTCCTGGTCT-1	327	Oligo NN	327 Oligo NN	31	OPC-Oligo	31 OPC-Oligo
12m_rep1	AGCCTAAGTACAAAGA-1	334	Microglia NN	334 Microglia NN	34	Immune	34 Immune
12m_rep1	AGCCTAAGTCAATACG-1	327	Oligo NN	327 Oligo NN	31	OPC-Oligo	31 OPC-Oligo
12m_rep1	AGCCTAAGTGGTGAGA-1	327	Oligo NN	327 Oligo NN	31	OPC-Oligo	31 OPC-Oligo
12m_rep1	AGCCTAAGTTCCAGGG-1	327	Oligo NN	327 Oligo NN	31	OPC-Oligo	31 OPC-Oligo
12m_rep1	AGCCTAAGTTCCGGGA-1	197	SNr Six3 Gaba	197 SNr Six3 Gaba	20	MB GABA	20 MB GABA
12m_rep1	AGCCTAAGTTTGAGGC-1	327	Oligo NN	327 Oligo NN	31	OPC-Oligo	31 OPC-Oligo
12m_rep1	AGCCTAGTCATCCACC-1	327	Oligo NN	327 Oligo NN	31	OPC-Oligo	31 OPC-Oligo
12m_rep1	AGCCTAGTCCGCAACA-1	197	SNr Six3 Gaba	197 SNr Six3 Gaba	20	MB GABA	20 MB GABA
12m_rep1	AGCCTAGTCCTAAGAC-1	327	Oligo NN	327 Oligo NN	31	OPC-Oligo	31 OPC-Oligo
12m_rep1	AGCCTAGTCGATTCTT-1	327	Oligo NN	327 Oligo NN	31	OPC-Oligo	31 OPC-Oligo
12m_rep1	AGCCTAGTCGATTTGA-1	327	Oligo NN	327 Oligo NN	31	OPC-Oligo	31 OPC-Oligo
12m_rep1	AGCCTAGTCGTTCACC-1	327	Oligo NN	327 Oligo NN	31	OPC-Oligo	31 OPC-Oligo
12m_rep1	AGCCTAGTCTTGGATA-1	327	Oligo NN	327 Oligo NN	31	OPC-Oligo	31 OPC-Oligo
12m_rep1	AGCCTCCGTACTGATG-1	334	Microglia NN	334 Microglia NN	34	Immune	34 Immune
12m_rep1	AGCCTCCGTCAGGCAT-1	327	Oligo NN	327 Oligo NN	31	OPC-Oligo	31 OPC-Oligo
12m_rep1	AGCCTCCGTCCTAACT-1	197	SNr Six3 Gaba	197 SNr Six3 Gaba	20	MB GABA	20 MB GABA
12m_rep1	AGCCTCCGTGCGCATG-1	327	Oligo NN	327 Oligo NN	31	OPC-Oligo	31 OPC-Oligo
12m_rep1	AGCCTCCGTTAAGTGT-1	327	Oligo NN	327 Oligo NN	31	OPC-Oligo	31 OPC-Oligo
12m_rep1	AGCCTCCGTTAGGCGT-1	327	Oligo NN	327 Oligo NN	31	OPC-Oligo	31 OPC-Oligo
12m_rep1	AGCCTCCGTTCCATTA-1	327	Oligo NN	327 Oligo NN	31	OPC-Oligo	31 OPC-Oligo
12m_rep1	AGCCTCCGTTCCTCCT-1	334	Microglia NN	334 Microglia NN	34	Immune	34 Immune
12m_rep1	AGCCTCCGTTTAACGG-1	327	Oligo NN	327 Oligo NN	31	OPC-Oligo	31 OPC-Oligo
12m_rep1	AGCCTGGGTAATGACT-1	327	Oligo NN	327 Oligo NN	31	OPC-Oligo	31 OPC-Oligo
12m_rep1	AGCCTGGGTACCCACC-1	326	OPC NN	326 OPC NN	31	OPC-Oligo	31 OPC-Oligo
12m_rep1	AGCCTGGGTAGCTGCG-1	327	Oligo NN	327 Oligo NN	31	OPC-Oligo	31 OPC-Oligo
12m_rep1	AGCCTGGGTCCTAGTT-1	318	Astro-NT NN	318 Astro-NT NN	30	Astro-Epen	30 Astro-Epen
12m_rep1	AGCCTGGGTCCTTAGT-1	93	RT-ZI Gnb3 Gaba	093 RT-ZI Gnb3 Gaba	12	HY GABA	12 HY GABA
12m_rep1	AGCCTGGGTTAGGTGC-1	327	Oligo NN	327 Oligo NN	31	OPC-Oligo	31 OPC-Oligo
12m_rep1	AGCCTGGGTTCCATTA-1	139	PH-LHA Foxb1 Glut	139 PH-LHA Foxb1 Glut	14	HY Glut	14 HY Glut
12m_rep1	AGCCTGGGTTGCCTCA-1	327	Oligo NN	327 Oligo NN	31	OPC-Oligo	31 OPC-Oligo
12m_rep1	AGCCTGGGTTTCGCCA-1	327	Oligo NN	327 Oligo NN	31	OPC-Oligo	31 OPC-Oligo
12m_rep1	AGCGCCTAGCCTGACA-1	327	Oligo NN	327 Oligo NN	31	OPC-Oligo	31 OPC-Oligo
12m_rep1	AGCGCCTAGGAGCATA-1	101	ZI Pax6 Gaba	101 ZI Pax6 Gaba	12	HY GABA	12 HY GABA
12m_rep1	AGCGCCTAGGCTAATC-1	327	Oligo NN	327 Oligo NN	31	OPC-Oligo	31 OPC-Oligo
12m_rep1	AGCGCCTAGTAACCCG-1	327	Oligo NN	327 Oligo NN	31	OPC-Oligo	31 OPC-Oligo
12m_rep1	AGCGCCTAGTATTGCA-1	327	Oligo NN	327 Oligo NN	31	OPC-Oligo	31 OPC-Oligo
12m_rep1	AGCGCCTAGTGCACGC-1	135	STN-PSTN Pitx2 Glut	135 STN-PSTN Pitx2 Glut	14	HY Glut	14 HY Glut
12m_rep1	AGCGCTCAGAAAGGAA-1	327	Oligo NN	327 Oligo NN	31	OPC-Oligo	31 OPC-Oligo
12m_rep1	AGCGCTCAGAATCTCA-1	197	SNr Six3 Gaba	197 SNr Six3 Gaba	20	MB GABA	20 MB GABA
12m_rep1	AGCGCTCAGCATCCAG-1	197	SNr Six3 Gaba	197 SNr Six3 Gaba	20	MB GABA	20 MB GABA
12m_rep1	AGCGCTCAGCTTAGTA-1	327	Oligo NN	327 Oligo NN	31	OPC-Oligo	31 OPC-Oligo
12m_rep1	AGCGCTCAGGAGCAAC-1	138	PH Pitx2 Glut	138 PH Pitx2 Glut	14	HY Glut	14 HY Glut
12m_rep1	AGCGCTCAGTCATCCC-1	138	PH Pitx2 Glut	138 PH Pitx2 Glut	14	HY Glut	14 HY Glut
12m_rep1	AGCGCTCAGTTATGTG-1	197	SNr Six3 Gaba	197 SNr Six3 Gaba	20	MB GABA	20 MB GABA
12m_rep1	AGCGGACCAATCGCAC-1	168	SPA-SPFm-SPFp-POL-PIL-PoT Sp9 Glut	168 SPA-SPFm-SPFp-POL-PIL-PoT Sp9 Glut	19	MB Glut	19 MB Glut
12m_rep1	AGCGGACCAGCAACAG-1	327	Oligo NN	327 Oligo NN	31	OPC-Oligo	31 OPC-Oligo
12m_rep1	AGCGGATAGGGCTTAT-1	326	OPC NN	326 OPC NN	31	OPC-Oligo	31 OPC-Oligo
12m_rep1	AGCGGATAGGTTAGAG-1	168	SPA-SPFm-SPFp-POL-PIL-PoT Sp9 Glut	168 SPA-SPFm-SPFp-POL-PIL-PoT Sp9 Glut	19	MB Glut	19 MB Glut
12m_rep1	AGCGGATAGTAACAGG-1	327	Oligo NN	327 Oligo NN	31	OPC-Oligo	31 OPC-Oligo
12m_rep1	AGCGGATAGTCTCACC-1	327	Oligo NN	327 Oligo NN	31	OPC-Oligo	31 OPC-Oligo
12m_rep1	AGCGTGCTCATGGTGT-1	327	Oligo NN	327 Oligo NN	31	OPC-Oligo	31 OPC-Oligo
12m_rep1	AGCGTGCTCATGGTTA-1	327	Oligo NN	327 Oligo NN	31	OPC-Oligo	31 OPC-Oligo
12m_rep1	AGCGTGCTCATTACAG-1	327	Oligo NN	327 Oligo NN	31	OPC-Oligo	31 OPC-Oligo
12m_rep1	AGCGTGCTCATTCATC-1	327	Oligo NN	327 Oligo NN	31	OPC-Oligo	31 OPC-Oligo
12m_rep1	AGCGTGCTCCAGCACA-1	197	SNr Six3 Gaba	197 SNr Six3 Gaba	20	MB GABA	20 MB GABA
12m_rep1	AGCGTGCTCCAGGTTG-1	165	PAG-MRN Pou3f1 Glut	165 PAG-MRN Pou3f1 Glut	19	MB Glut	19 MB Glut
12m_rep1	AGCGTGCTCTCACAAA-1	327	Oligo NN	327 Oligo NN	31	OPC-Oligo	31 OPC-Oligo
12m_rep1	AGCGTGCTCTCCATGC-1	16	CA1-ProS Glut	016 CA1-ProS Glut	1	IT-ET Glut	01 IT-ET Glut
12m_rep1	AGCGTGCTCTGTGCCT-1	327	Oligo NN	327 Oligo NN	31	OPC-Oligo	31 OPC-Oligo
12m_rep1	AGCTAAACACCTGCTC-1	135	STN-PSTN Pitx2 Glut	135 STN-PSTN Pitx2 Glut	14	HY Glut	14 HY Glut
12m_rep1	AGCTAAACAGCATGTC-1	197	SNr Six3 Gaba	197 SNr Six3 Gaba	20	MB GABA	20 MB GABA
12m_rep1	AGCTAAACATAAAGCA-1	327	Oligo NN	327 Oligo NN	31	OPC-Oligo	31 OPC-Oligo
12m_rep1	AGCTAACTCAAGCGCC-1	197	SNr Six3 Gaba	197 SNr Six3 Gaba	20	MB GABA	20 MB GABA
12m_rep1	AGCTAACTCACTAAGC-1	327	Oligo NN	327 Oligo NN	31	OPC-Oligo	31 OPC-Oligo
12m_rep1	AGCTAACTCAGCAAGA-1	327	Oligo NN	327 Oligo NN	31	OPC-Oligo	31 OPC-Oligo
12m_rep1	AGCTAACTCAGGTCCA-1	327	Oligo NN	327 Oligo NN	31	OPC-Oligo	31 OPC-Oligo
12m_rep1	AGCTAACTCCCGTTTA-1	197	SNr Six3 Gaba	197 SNr Six3 Gaba	20	MB GABA	20 MB GABA
12m_rep1	AGCTAACTCCTAGTCC-1	327	Oligo NN	327 Oligo NN	31	OPC-Oligo	31 OPC-Oligo
12m_rep1	AGCTAACTCGTGCTAG-1	327	Oligo NN	327 Oligo NN	31	OPC-Oligo	31 OPC-Oligo
12m_rep1	AGCTACGTCCCGTTTA-1	327	Oligo NN	327 Oligo NN	31	OPC-Oligo	31 OPC-Oligo
12m_rep1	AGCTACGTCTTAGGAC-1	327	Oligo NN	327 Oligo NN	31	OPC-Oligo	31 OPC-Oligo
12m_rep1	AGCTACGTCTTTGTAC-1	197	SNr Six3 Gaba	197 SNr Six3 Gaba	20	MB GABA	20 MB GABA
12m_rep1	AGCTACTAGCAAGATG-1	135	STN-PSTN Pitx2 Glut	135 STN-PSTN Pitx2 Glut	14	HY Glut	14 HY Glut
12m_rep1	AGCTACTAGTTAGCTA-1	327	Oligo NN	327 Oligo NN	31	OPC-Oligo	31 OPC-Oligo
12m_rep1	AGCTAGTTCAATGTCA-1	327	Oligo NN	327 Oligo NN	31	OPC-Oligo	31 OPC-Oligo
12m_rep1	AGCTAGTTCATGGTGT-1	334	Microglia NN	334 Microglia NN	34	Immune	34 Immune
12m_rep1	AGCTAGTTCATTTGTC-1	197	SNr Six3 Gaba	197 SNr Six3 Gaba	20	MB GABA	20 MB GABA
12m_rep1	AGCTAGTTCCTAAGAC-1	327	Oligo NN	327 Oligo NN	31	OPC-Oligo	31 OPC-Oligo
12m_rep1	AGCTAGTTCGACAAAG-1	327	Oligo NN	327 Oligo NN	31	OPC-Oligo	31 OPC-Oligo
12m_rep1	AGCTAGTTCGAGGAAC-1	327	Oligo NN	327 Oligo NN	31	OPC-Oligo	31 OPC-Oligo
12m_rep1	AGCTAGTTCTAAGTCA-1	197	SNr Six3 Gaba	197 SNr Six3 Gaba	20	MB GABA	20 MB GABA
12m_rep1	AGCTAGTTCTAGCTAA-1	327	Oligo NN	327 Oligo NN	31	OPC-Oligo	31 OPC-Oligo
12m_rep1	AGCTAGTTCTTGCAGG-1	135	STN-PSTN Pitx2 Glut	135 STN-PSTN Pitx2 Glut	14	HY Glut	14 HY Glut
12m_rep1	AGCTATATCCGCAAAT-1	197	SNr Six3 Gaba	197 SNr Six3 Gaba	20	MB GABA	20 MB GABA
12m_rep1	AGCTATATCTAGCGTG-1	327	Oligo NN	327 Oligo NN	31	OPC-Oligo	31 OPC-Oligo
12m_rep1	AGCTGCTCAATGCCTA-1	197	SNr Six3 Gaba	197 SNr Six3 Gaba	20	MB GABA	20 MB GABA
12m_rep1	AGCTGCTCACCTGCCT-1	327	Oligo NN	327 Oligo NN	31	OPC-Oligo	31 OPC-Oligo
12m_rep1	AGCTGCTCAGAACCGA-1	327	Oligo NN	327 Oligo NN	31	OPC-Oligo	31 OPC-Oligo
12m_rep1	AGCTGCTCAGCACCAT-1	327	Oligo NN	327 Oligo NN	31	OPC-Oligo	31 OPC-Oligo
12m_rep1	AGCTTAATCCACAATA-1	168	SPA-SPFm-SPFp-POL-PIL-PoT Sp9 Glut	168 SPA-SPFm-SPFp-POL-PIL-PoT Sp9 Glut	19	MB Glut	19 MB Glut
12m_rep1	AGCTTAATCCTGATTT-1	327	Oligo NN	327 Oligo NN	31	OPC-Oligo	31 OPC-Oligo
12m_rep1	AGCTTCCTCAATGACC-1	327	Oligo NN	327 Oligo NN	31	OPC-Oligo	31 OPC-Oligo
12m_rep1	AGCTTCCTCAATGAGG-1	141	PH-SUM Foxa1 Glut	141 PH-SUM Foxa1 Glut	14	HY Glut	14 HY Glut
12m_rep1	AGCTTCCTCAATTACG-1	195	SNr-VTA Pax5 Npas1 Gaba	195 SNr-VTA Pax5 Npas1 Gaba	20	MB GABA	20 MB GABA
12m_rep1	AGCTTCCTCCAATTAG-1	327	Oligo NN	327 Oligo NN	31	OPC-Oligo	31 OPC-Oligo
12m_rep1	AGCTTCCTCCACCTGT-1	327	Oligo NN	327 Oligo NN	31	OPC-Oligo	31 OPC-Oligo
12m_rep1	AGCTTCCTCCCTCAAC-1	197	SNr Six3 Gaba	197 SNr Six3 Gaba	20	MB GABA	20 MB GABA
12m_rep1	AGCTTCCTCTAACCTT-1	327	Oligo NN	327 Oligo NN	31	OPC-Oligo	31 OPC-Oligo
12m_rep1	AGCTTGGTCTCAATAG-1	327	Oligo NN	327 Oligo NN	31	OPC-Oligo	31 OPC-Oligo
12m_rep1	AGCTTGGTCTGGCTTC-1	16	CA1-ProS Glut	016 CA1-ProS Glut	1	IT-ET Glut	01 IT-ET Glut
12m_rep1	AGCTTTAAGCCAGTAT-1	327	Oligo NN	327 Oligo NN	31	OPC-Oligo	31 OPC-Oligo
12m_rep1	AGCTTTAAGGAGTCTT-1	16	CA1-ProS Glut	016 CA1-ProS Glut	1	IT-ET Glut	01 IT-ET Glut
12m_rep1	AGCTTTAAGTTATGTG-1	327	Oligo NN	327 Oligo NN	31	OPC-Oligo	31 OPC-Oligo
12m_rep1	AGGAAACGTCCTCCAA-1	16	CA1-ProS Glut	016 CA1-ProS Glut	1	IT-ET Glut	01 IT-ET Glut
12m_rep1	AGGAAACGTGCTCCGT-1	327	Oligo NN	327 Oligo NN	31	OPC-Oligo	31 OPC-Oligo
12m_rep1	AGGAAACGTGGAGCAA-1	135	STN-PSTN Pitx2 Glut	135 STN-PSTN Pitx2 Glut	14	HY Glut	14 HY Glut
12m_rep1	AGGAACCAGCACGTTG-1	326	OPC NN	326 OPC NN	31	OPC-Oligo	31 OPC-Oligo
12m_rep1	AGGAACCAGGAACCAA-1	327	Oligo NN	327 Oligo NN	31	OPC-Oligo	31 OPC-Oligo
12m_rep1	AGGAACCAGGACACTT-1	327	Oligo NN	327 Oligo NN	31	OPC-Oligo	31 OPC-Oligo
12m_rep1	AGGAACCAGGCGTAAA-1	327	Oligo NN	327 Oligo NN	31	OPC-Oligo	31 OPC-Oligo
12m_rep1	AGGAACGGTAGGTTTG-1	138	PH Pitx2 Glut	138 PH Pitx2 Glut	14	HY Glut	14 HY Glut
12m_rep1	AGGACGTAGAACCTAC-1	327	Oligo NN	327 Oligo NN	31	OPC-Oligo	31 OPC-Oligo
12m_rep1	AGGACGTAGCATCCAG-1	327	Oligo NN	327 Oligo NN	31	OPC-Oligo	31 OPC-Oligo
12m_rep1	AGGACGTAGTAATCCA-1	327	Oligo NN	327 Oligo NN	31	OPC-Oligo	31 OPC-Oligo
12m_rep1	AGGACGTAGTGTGATC-1	135	STN-PSTN Pitx2 Glut	135 STN-PSTN Pitx2 Glut	14	HY Glut	14 HY Glut
12m_rep1	AGGACGTAGTTAACCA-1	197	SNr Six3 Gaba	197 SNr Six3 Gaba	20	MB GABA	20 MB GABA
12m_rep1	AGGACTAAGACAGGTA-1	327	Oligo NN	327 Oligo NN	31	OPC-Oligo	31 OPC-Oligo
12m_rep1	AGGACTAAGGATCACT-1	327	Oligo NN	327 Oligo NN	31	OPC-Oligo	31 OPC-Oligo
12m_rep1	AGGACTAAGGGTGGAT-1	159	IF-RL-CLI-PAG Foxa1 Glut	159 IF-RL-CLI-PAG Foxa1 Glut	19	MB Glut	19 MB Glut
12m_rep1	AGGACTAAGTTAGAGG-1	138	PH Pitx2 Glut	138 PH Pitx2 Glut	14	HY Glut	14 HY Glut
12m_rep1	AGGAGCTAGCTGGCTA-1	156	MB-ant-ve Dmrta2 Glut	156 MB-ant-ve Dmrta2 Glut	19	MB Glut	19 MB Glut
12m_rep1	AGGAGCTAGTAGGCGG-1	197	SNr Six3 Gaba	197 SNr Six3 Gaba	20	MB GABA	20 MB GABA
12m_rep1	AGGAGCTAGTGGCGGA-1	139	PH-LHA Foxb1 Glut	139 PH-LHA Foxb1 Glut	14	HY Glut	14 HY Glut
12m_rep1	AGGATATAGAAAGGAA-1	327	Oligo NN	327 Oligo NN	31	OPC-Oligo	31 OPC-Oligo
12m_rep1	AGGATATAGAACCTGT-1	327	Oligo NN	327 Oligo NN	31	OPC-Oligo	31 OPC-Oligo
12m_rep1	AGGATATAGCCGCAGT-1	327	Oligo NN	327 Oligo NN	31	OPC-Oligo	31 OPC-Oligo
12m_rep1	AGGATATAGCGGGCAA-1	101	ZI Pax6 Gaba	101 ZI Pax6 Gaba	12	HY GABA	12 HY GABA
12m_rep1	AGGATATAGGCGCTAC-1	16	CA1-ProS Glut	016 CA1-ProS Glut	1	IT-ET Glut	01 IT-ET Glut
12m_rep1	AGGATATAGGCTTAAC-1	327	Oligo NN	327 Oligo NN	31	OPC-Oligo	31 OPC-Oligo
12m_rep1	AGGATATAGGGCTAAA-1	197	SNr Six3 Gaba	197 SNr Six3 Gaba	20	MB GABA	20 MB GABA
12m_rep1	AGGATCCGTACCTTAC-1	327	Oligo NN	327 Oligo NN	31	OPC-Oligo	31 OPC-Oligo
12m_rep1	AGGATCCGTTAACACG-1	327	Oligo NN	327 Oligo NN	31	OPC-Oligo	31 OPC-Oligo
12m_rep1	AGGATGCAGACAGGCG-1	139	PH-LHA Foxb1 Glut	139 PH-LHA Foxb1 Glut	14	HY Glut	14 HY Glut
12m_rep1	AGGATGCAGCTATATG-1	135	STN-PSTN Pitx2 Glut	135 STN-PSTN Pitx2 Glut	14	HY Glut	14 HY Glut
12m_rep1	AGGATGCAGGTCCACA-1	135	STN-PSTN Pitx2 Glut	135 STN-PSTN Pitx2 Glut	14	HY Glut	14 HY Glut
12m_rep1	AGGATGTCAATAAGCA-1	327	Oligo NN	327 Oligo NN	31	OPC-Oligo	31 OPC-Oligo
12m_rep1	AGGATTGAGACACCGC-1	327	Oligo NN	327 Oligo NN	31	OPC-Oligo	31 OPC-Oligo
12m_rep1	AGGATTGAGCTTCTCA-1	327	Oligo NN	327 Oligo NN	31	OPC-Oligo	31 OPC-Oligo
12m_rep1	AGGATTGAGGGACTAA-1	318	Astro-NT NN	318 Astro-NT NN	30	Astro-Epen	30 Astro-Epen
12m_rep1	AGGATTGAGTCTCACC-1	327	Oligo NN	327 Oligo NN	31	OPC-Oligo	31 OPC-Oligo
12m_rep1	AGGCAATCAACTAGAA-1	197	SNr Six3 Gaba	197 SNr Six3 Gaba	20	MB GABA	20 MB GABA
12m_rep1	AGGCAATCAAGGATTA-1	327	Oligo NN	327 Oligo NN	31	OPC-Oligo	31 OPC-Oligo
12m_rep1	AGGCAATCAATTTAGC-1	327	Oligo NN	327 Oligo NN	31	OPC-Oligo	31 OPC-Oligo
12m_rep1	AGGCAATCACAGGATG-1	139	PH-LHA Foxb1 Glut	139 PH-LHA Foxb1 Glut	14	HY Glut	14 HY Glut
12m_rep1	AGGCAATCATCACAGC-1	327	Oligo NN	327 Oligo NN	31	OPC-Oligo	31 OPC-Oligo
12m_rep1	AGGCAATCATGGCCCA-1	135	STN-PSTN Pitx2 Glut	135 STN-PSTN Pitx2 Glut	14	HY Glut	14 HY Glut
12m_rep1	AGGCAATCATGGTTAT-1	327	Oligo NN	327 Oligo NN	31	OPC-Oligo	31 OPC-Oligo
12m_rep1	AGGCAATCATGTTGCA-1	197	SNr Six3 Gaba	197 SNr Six3 Gaba	20	MB GABA	20 MB GABA
12m_rep1	AGGCAGGTCAATCATG-1	327	Oligo NN	327 Oligo NN	31	OPC-Oligo	31 OPC-Oligo
12m_rep1	AGGCAGGTCTAATTGG-1	327	Oligo NN	327 Oligo NN	31	OPC-Oligo	31 OPC-Oligo
12m_rep1	AGGCAGGTCTACCTGC-1	16	CA1-ProS Glut	016 CA1-ProS Glut	1	IT-ET Glut	01 IT-ET Glut
12m_rep1	AGGCCCAGTATTGTCC-1	166	MRN Pou3f1 C1ql4 Glut	166 MRN Pou3f1 C1ql4 Glut	19	MB Glut	19 MB Glut
12m_rep1	AGGCCCAGTGATTACG-1	138	PH Pitx2 Glut	138 PH Pitx2 Glut	14	HY Glut	14 HY Glut
12m_rep1	AGGCCCAGTTGGATCA-1	327	Oligo NN	327 Oligo NN	31	OPC-Oligo	31 OPC-Oligo
12m_rep1	AGGCGGATCATTTGCT-1	101	ZI Pax6 Gaba	101 ZI Pax6 Gaba	12	HY GABA	12 HY GABA
12m_rep1	AGGCGGATCGCTCACT-1	327	Oligo NN	327 Oligo NN	31	OPC-Oligo	31 OPC-Oligo
12m_rep1	AGGCGGATCGGTCAGC-1	327	Oligo NN	327 Oligo NN	31	OPC-Oligo	31 OPC-Oligo
12m_rep1	AGGCTAAAGCTATTGA-1	135	STN-PSTN Pitx2 Glut	135 STN-PSTN Pitx2 Glut	14	HY Glut	14 HY Glut
12m_rep1	AGGCTAAAGGCCGGAA-1	327	Oligo NN	327 Oligo NN	31	OPC-Oligo	31 OPC-Oligo
12m_rep1	AGGCTAAAGTTGGCCA-1	327	Oligo NN	327 Oligo NN	31	OPC-Oligo	31 OPC-Oligo
12m_rep1	AGGCTAGCACAGACTC-1	195	SNr-VTA Pax5 Npas1 Gaba	195 SNr-VTA Pax5 Npas1 Gaba	20	MB GABA	20 MB GABA
12m_rep1	AGGCTAGCACATAACT-1	197	SNr Six3 Gaba	197 SNr Six3 Gaba	20	MB GABA	20 MB GABA
12m_rep1	AGGCTAGCAGAACCGA-1	197	SNr Six3 Gaba	197 SNr Six3 Gaba	20	MB GABA	20 MB GABA
12m_rep1	AGGCTAGCATGTTGCA-1	327	Oligo NN	327 Oligo NN	31	OPC-Oligo	31 OPC-Oligo
12m_rep1	AGGGCCTTCATGACCG-1	327	Oligo NN	327 Oligo NN	31	OPC-Oligo	31 OPC-Oligo
12m_rep1	AGGGCCTTCATTGTCT-1	327	Oligo NN	327 Oligo NN	31	OPC-Oligo	31 OPC-Oligo
12m_rep1	AGGGCCTTCCAGGTCA-1	327	Oligo NN	327 Oligo NN	31	OPC-Oligo	31 OPC-Oligo
12m_rep1	AGGGCCTTCGCTCACT-1	135	STN-PSTN Pitx2 Glut	135 STN-PSTN Pitx2 Glut	14	HY Glut	14 HY Glut
12m_rep1	AGGGCCTTCGTAACGT-1	197	SNr Six3 Gaba	197 SNr Six3 Gaba	20	MB GABA	20 MB GABA
12m_rep1	AGGGCCTTCTGTGAGT-1	16	CA1-ProS Glut	016 CA1-ProS Glut	1	IT-ET Glut	01 IT-ET Glut
12m_rep1	AGGGCTACAAGCCACT-1	197	SNr Six3 Gaba	197 SNr Six3 Gaba	20	MB GABA	20 MB GABA
12m_rep1	AGGGCTACAAGGTGCA-1	166	MRN Pou3f1 C1ql4 Glut	166 MRN Pou3f1 C1ql4 Glut	19	MB Glut	19 MB Glut
12m_rep1	AGGGCTACAAGTTATC-1	327	Oligo NN	327 Oligo NN	31	OPC-Oligo	31 OPC-Oligo
12m_rep1	AGGGCTACAATGAGGT-1	327	Oligo NN	327 Oligo NN	31	OPC-Oligo	31 OPC-Oligo
12m_rep1	AGGGCTACAGAATGAC-1	166	MRN Pou3f1 C1ql4 Glut	166 MRN Pou3f1 C1ql4 Glut	19	MB Glut	19 MB Glut
12m_rep1	AGGGCTACATTAGCGC-1	16	CA1-ProS Glut	016 CA1-ProS Glut	1	IT-ET Glut	01 IT-ET Glut
12m_rep1	AGGGTTGCACGAATTT-1	327	Oligo NN	327 Oligo NN	31	OPC-Oligo	31 OPC-Oligo
12m_rep1	AGGTAACCAGTTTCTC-1	327	Oligo NN	327 Oligo NN	31	OPC-Oligo	31 OPC-Oligo
12m_rep1	AGGTAACCATAATCGT-1	327	Oligo NN	327 Oligo NN	31	OPC-Oligo	31 OPC-Oligo
12m_rep1	AGGTAACCATTAAGCT-1	327	Oligo NN	327 Oligo NN	31	OPC-Oligo	31 OPC-Oligo
12m_rep1	AGGTACGCAATAGTCT-1	327	Oligo NN	327 Oligo NN	31	OPC-Oligo	31 OPC-Oligo
12m_rep1	AGGTACGCATAGCAGG-1	327	Oligo NN	327 Oligo NN	31	OPC-Oligo	31 OPC-Oligo
12m_rep1	AGGTATTGTCCTTCTC-1	327	Oligo NN	327 Oligo NN	31	OPC-Oligo	31 OPC-Oligo
12m_rep1	AGGTATTGTGACATAT-1	327	Oligo NN	327 Oligo NN	31	OPC-Oligo	31 OPC-Oligo
12m_rep1	AGGTATTGTTCGCTTG-1	135	STN-PSTN Pitx2 Glut	135 STN-PSTN Pitx2 Glut	14	HY Glut	14 HY Glut
12m_rep1	AGGTATTGTTGGTGAC-1	327	Oligo NN	327 Oligo NN	31	OPC-Oligo	31 OPC-Oligo
12m_rep1	AGGTCAAAGTAATCCA-1	135	STN-PSTN Pitx2 Glut	135 STN-PSTN Pitx2 Glut	14	HY Glut	14 HY Glut
12m_rep1	AGGTCATTCAATAGCC-1	197	SNr Six3 Gaba	197 SNr Six3 Gaba	20	MB GABA	20 MB GABA
12m_rep1	AGGTCATTCAGCAAGA-1	197	SNr Six3 Gaba	197 SNr Six3 Gaba	20	MB GABA	20 MB GABA
12m_rep1	AGGTCATTCATGCTAA-1	197	SNr Six3 Gaba	197 SNr Six3 Gaba	20	MB GABA	20 MB GABA
12m_rep1	AGGTCATTCTGTAAGC-1	327	Oligo NN	327 Oligo NN	31	OPC-Oligo	31 OPC-Oligo
12m_rep1	AGGTCCGGTAAGGTTT-1	135	STN-PSTN Pitx2 Glut	135 STN-PSTN Pitx2 Glut	14	HY Glut	14 HY Glut
12m_rep1	AGGTCCGGTACCCACC-1	138	PH Pitx2 Glut	138 PH Pitx2 Glut	14	HY Glut	14 HY Glut
12m_rep1	AGGTCCGGTATTGCAG-1	93	RT-ZI Gnb3 Gaba	093 RT-ZI Gnb3 Gaba	12	HY GABA	12 HY GABA
12m_rep1	AGGTCCGGTGGGAACA-1	197	SNr Six3 Gaba	197 SNr Six3 Gaba	20	MB GABA	20 MB GABA
12m_rep1	AGGTCCGGTTTATCTG-1	135	STN-PSTN Pitx2 Glut	135 STN-PSTN Pitx2 Glut	14	HY Glut	14 HY Glut
12m_rep1	AGGTCTTAGAAGGTGC-1	16	CA1-ProS Glut	016 CA1-ProS Glut	1	IT-ET Glut	01 IT-ET Glut
12m_rep1	AGGTCTTAGCACGTTG-1	318	Astro-NT NN	318 Astro-NT NN	30	Astro-Epen	30 Astro-Epen
12m_rep1	AGGTCTTAGCGCAATT-1	166	MRN Pou3f1 C1ql4 Glut	166 MRN Pou3f1 C1ql4 Glut	19	MB Glut	19 MB Glut
12m_rep1	AGGTCTTAGCGGGCAA-1	318	Astro-NT NN	318 Astro-NT NN	30	Astro-Epen	30 Astro-Epen
12m_rep1	AGGTCTTAGCTTACTT-1	327	Oligo NN	327 Oligo NN	31	OPC-Oligo	31 OPC-Oligo
12m_rep1	AGGTCTTAGGCCTGGT-1	327	Oligo NN	327 Oligo NN	31	OPC-Oligo	31 OPC-Oligo
12m_rep1	AGGTCTTAGGCGCACT-1	197	SNr Six3 Gaba	197 SNr Six3 Gaba	20	MB GABA	20 MB GABA
12m_rep1	AGGTCTTAGGTCCACA-1	327	Oligo NN	327 Oligo NN	31	OPC-Oligo	31 OPC-Oligo
12m_rep1	AGGTCTTAGTCATTAG-1	327	Oligo NN	327 Oligo NN	31	OPC-Oligo	31 OPC-Oligo
12m_rep1	AGGTCTTAGTCCTTCA-1	327	Oligo NN	327 Oligo NN	31	OPC-Oligo	31 OPC-Oligo
12m_rep1	AGGTCTTAGTGAACAG-1	327	Oligo NN	327 Oligo NN	31	OPC-Oligo	31 OPC-Oligo
12m_rep1	AGGTCTTAGTTCCCAC-1	327	Oligo NN	327 Oligo NN	31	OPC-Oligo	31 OPC-Oligo
12m_rep1	AGGTGAATCCGCCAAA-1	327	Oligo NN	327 Oligo NN	31	OPC-Oligo	31 OPC-Oligo
12m_rep1	AGGTGAATCGCATCCT-1	327	Oligo NN	327 Oligo NN	31	OPC-Oligo	31 OPC-Oligo
12m_rep1	AGGTGAATCGCGACAC-1	197	SNr Six3 Gaba	197 SNr Six3 Gaba	20	MB GABA	20 MB GABA
12m_rep1	AGGTGAATCGTTTCGC-1	327	Oligo NN	327 Oligo NN	31	OPC-Oligo	31 OPC-Oligo
12m_rep1	AGGTGAATCTAATCCT-1	327	Oligo NN	327 Oligo NN	31	OPC-Oligo	31 OPC-Oligo
12m_rep1	AGGTGAATCTGTGCAG-1	327	Oligo NN	327 Oligo NN	31	OPC-Oligo	31 OPC-Oligo
12m_rep1	AGGTGAGGTTAAGGTT-1	327	Oligo NN	327 Oligo NN	31	OPC-Oligo	31 OPC-Oligo
12m_rep1	AGGTGAGGTTACGCGG-1	135	STN-PSTN Pitx2 Glut	135 STN-PSTN Pitx2 Glut	14	HY Glut	14 HY Glut
12m_rep1	AGGTTAACAGGACCTT-1	16	CA1-ProS Glut	016 CA1-ProS Glut	1	IT-ET Glut	01 IT-ET Glut
12m_rep1	AGGTTAACAGTCTAGC-1	197	SNr Six3 Gaba	197 SNr Six3 Gaba	20	MB GABA	20 MB GABA
12m_rep1	AGGTTAACAGTTGCGT-1	197	SNr Six3 Gaba	197 SNr Six3 Gaba	20	MB GABA	20 MB GABA
12m_rep1	AGGTTAACATGTTTGG-1	327	Oligo NN	327 Oligo NN	31	OPC-Oligo	31 OPC-Oligo
12m_rep1	AGGTTACTCATTACGA-1	101	ZI Pax6 Gaba	101 ZI Pax6 Gaba	12	HY GABA	12 HY GABA
12m_rep1	AGGTTACTCCATAATG-1	199	PAG-MRN-RN Foxa2 Gaba	199 PAG-MRN-RN Foxa2 Gaba	20	MB GABA	20 MB GABA
12m_rep1	AGGTTACTCCGCACAA-1	318	Astro-NT NN	318 Astro-NT NN	30	Astro-Epen	30 Astro-Epen
12m_rep1	AGGTTACTCTAATTGG-1	327	Oligo NN	327 Oligo NN	31	OPC-Oligo	31 OPC-Oligo
12m_rep1	AGGTTAGAGGCATGTT-1	327	Oligo NN	327 Oligo NN	31	OPC-Oligo	31 OPC-Oligo
12m_rep1	AGGTTAGAGGCTACAT-1	16	CA1-ProS Glut	016 CA1-ProS Glut	1	IT-ET Glut	01 IT-ET Glut
12m_rep1	AGGTTAGAGGCTTAGT-1	327	Oligo NN	327 Oligo NN	31	OPC-Oligo	31 OPC-Oligo
12m_rep1	AGGTTAGAGGGCCATC-1	327	Oligo NN	327 Oligo NN	31	OPC-Oligo	31 OPC-Oligo
12m_rep1	AGGTTGCGTAACCTAG-1	327	Oligo NN	327 Oligo NN	31	OPC-Oligo	31 OPC-Oligo
12m_rep1	AGGTTGCGTAGCTAGC-1	332	SMC NN	332 SMC NN	33	Vascular	33 Vascular
12m_rep1	AGGTTGCGTTACAACG-1	16	CA1-ProS Glut	016 CA1-ProS Glut	1	IT-ET Glut	01 IT-ET Glut
12m_rep1	AGGTTGCGTTGCACGG-1	166	MRN Pou3f1 C1ql4 Glut	166 MRN Pou3f1 C1ql4 Glut	19	MB Glut	19 MB Glut
12m_rep1	AGGTTTATCCCTCGCA-1	327	Oligo NN	327 Oligo NN	31	OPC-Oligo	31 OPC-Oligo
12m_rep1	AGGTTTATCCCTGGAA-1	326	OPC NN	326 OPC NN	31	OPC-Oligo	31 OPC-Oligo
12m_rep1	AGGTTTATCGGTTTGG-1	318	Astro-NT NN	318 Astro-NT NN	30	Astro-Epen	30 Astro-Epen
12m_rep1	AGGTTTATCTAATCAG-1	327	Oligo NN	327 Oligo NN	31	OPC-Oligo	31 OPC-Oligo
12m_rep1	AGGTTTATCTAATTGG-1	327	Oligo NN	327 Oligo NN	31	OPC-Oligo	31 OPC-Oligo
12m_rep1	AGGTTTGGTAGGTTGC-1	327	Oligo NN	327 Oligo NN	31	OPC-Oligo	31 OPC-Oligo
12m_rep1	AGGTTTGGTCCGTAGG-1	327	Oligo NN	327 Oligo NN	31	OPC-Oligo	31 OPC-Oligo
12m_rep1	AGGTTTGGTCTCACTG-1	327	Oligo NN	327 Oligo NN	31	OPC-Oligo	31 OPC-Oligo
12m_rep1	AGGTTTGGTTATCCGT-1	327	Oligo NN	327 Oligo NN	31	OPC-Oligo	31 OPC-Oligo
12m_rep1	AGGTTTGGTTCTTTAG-1	327	Oligo NN	327 Oligo NN	31	OPC-Oligo	31 OPC-Oligo
12m_rep1	AGGTTTGGTTGTGATG-1	166	MRN Pou3f1 C1ql4 Glut	166 MRN Pou3f1 C1ql4 Glut	19	MB Glut	19 MB Glut
12m_rep1	AGGTTTGGTTTATTCG-1	327	Oligo NN	327 Oligo NN	31	OPC-Oligo	31 OPC-Oligo
12m_rep1	AGGTTTGGTTTGGCTT-1	135	STN-PSTN Pitx2 Glut	135 STN-PSTN Pitx2 Glut	14	HY Glut	14 HY Glut
12m_rep1	AGTAAACAGATGCCTG-1	135	STN-PSTN Pitx2 Glut	135 STN-PSTN Pitx2 Glut	14	HY Glut	14 HY Glut
12m_rep1	AGTAAACAGCAGCTCA-1	334	Microglia NN	334 Microglia NN	34	Immune	34 Immune
12m_rep1	AGTAAACAGCTGTCAG-1	327	Oligo NN	327 Oligo NN	31	OPC-Oligo	31 OPC-Oligo
12m_rep1	AGTAAACAGGCGAATA-1	318	Astro-NT NN	318 Astro-NT NN	30	Astro-Epen	30 Astro-Epen
12m_rep1	AGTAAACAGTCAGGCC-1	327	Oligo NN	327 Oligo NN	31	OPC-Oligo	31 OPC-Oligo
12m_rep1	AGTAACACAATTGAAG-1	327	Oligo NN	327 Oligo NN	31	OPC-Oligo	31 OPC-Oligo
12m_rep1	AGTAACACATCCCTCA-1	327	Oligo NN	327 Oligo NN	31	OPC-Oligo	31 OPC-Oligo
12m_rep1	AGTAACCTCAATCATG-1	318	Astro-NT NN	318 Astro-NT NN	30	Astro-Epen	30 Astro-Epen
12m_rep1	AGTAACCTCCGTCCAT-1	327	Oligo NN	327 Oligo NN	31	OPC-Oligo	31 OPC-Oligo
12m_rep1	AGTAACCTCGTTAAGC-1	327	Oligo NN	327 Oligo NN	31	OPC-Oligo	31 OPC-Oligo
12m_rep1	AGTAACCTCTCACAAA-1	135	STN-PSTN Pitx2 Glut	135 STN-PSTN Pitx2 Glut	14	HY Glut	14 HY Glut
12m_rep1	AGTAACCTCTGGCAAT-1	327	Oligo NN	327 Oligo NN	31	OPC-Oligo	31 OPC-Oligo
12m_rep1	AGTAACCTCTTAGTCT-1	327	Oligo NN	327 Oligo NN	31	OPC-Oligo	31 OPC-Oligo
12m_rep1	AGTAACGAGCGGTTAT-1	327	Oligo NN	327 Oligo NN	31	OPC-Oligo	31 OPC-Oligo
12m_rep1	AGTAACGAGCTGTAAC-1	327	Oligo NN	327 Oligo NN	31	OPC-Oligo	31 OPC-Oligo
12m_rep1	AGTAACGAGGTTTGAC-1	327	Oligo NN	327 Oligo NN	31	OPC-Oligo	31 OPC-Oligo
12m_rep1	AGTAACGAGTTGTCTT-1	135	STN-PSTN Pitx2 Glut	135 STN-PSTN Pitx2 Glut	14	HY Glut	14 HY Glut
12m_rep1	AGTAAGTAGAAAGCAT-1	327	Oligo NN	327 Oligo NN	31	OPC-Oligo	31 OPC-Oligo
12m_rep1	AGTAAGTAGCATGTTA-1	334	Microglia NN	334 Microglia NN	34	Immune	34 Immune
12m_rep1	AGTAAGTAGTATTGTG-1	197	SNr Six3 Gaba	197 SNr Six3 Gaba	20	MB GABA	20 MB GABA
12m_rep1	AGTAAGTAGTTTGTCT-1	197	SNr Six3 Gaba	197 SNr Six3 Gaba	20	MB GABA	20 MB GABA
12m_rep1	AGTAATCGTAAAGCAA-1	327	Oligo NN	327 Oligo NN	31	OPC-Oligo	31 OPC-Oligo
12m_rep1	AGTAATCGTAATGGCC-1	327	Oligo NN	327 Oligo NN	31	OPC-Oligo	31 OPC-Oligo
12m_rep1	AGTAATCGTATTCGCT-1	327	Oligo NN	327 Oligo NN	31	OPC-Oligo	31 OPC-Oligo
12m_rep1	AGTAATCGTCACAGCG-1	327	Oligo NN	327 Oligo NN	31	OPC-Oligo	31 OPC-Oligo
12m_rep1	AGTAATCGTGTTAAAC-1	166	MRN Pou3f1 C1ql4 Glut	166 MRN Pou3f1 C1ql4 Glut	19	MB Glut	19 MB Glut
12m_rep1	AGTAATGCACAAACTT-1	327	Oligo NN	327 Oligo NN	31	OPC-Oligo	31 OPC-Oligo
12m_rep1	AGTAATGCACATTGCA-1	197	SNr Six3 Gaba	197 SNr Six3 Gaba	20	MB GABA	20 MB GABA
12m_rep1	AGTAATGCAGCACGTT-1	327	Oligo NN	327 Oligo NN	31	OPC-Oligo	31 OPC-Oligo
12m_rep1	AGTAATGCAGGCCAAA-1	197	SNr Six3 Gaba	197 SNr Six3 Gaba	20	MB GABA	20 MB GABA
12m_rep1	AGTAATGCATGAGCAG-1	197	SNr Six3 Gaba	197 SNr Six3 Gaba	20	MB GABA	20 MB GABA
12m_rep1	AGTACGCGTTAGGCGT-1	327	Oligo NN	327 Oligo NN	31	OPC-Oligo	31 OPC-Oligo
12m_rep1	AGTACGCGTTCACTGT-1	327	Oligo NN	327 Oligo NN	31	OPC-Oligo	31 OPC-Oligo
12m_rep1	AGTACGCGTTCCGCAC-1	326	OPC NN	326 OPC NN	31	OPC-Oligo	31 OPC-Oligo
12m_rep1	AGTAGCTTCAAGCTTA-1	135	STN-PSTN Pitx2 Glut	135 STN-PSTN Pitx2 Glut	14	HY Glut	14 HY Glut
12m_rep1	AGTAGCTTCACCTGCT-1	327	Oligo NN	327 Oligo NN	31	OPC-Oligo	31 OPC-Oligo
12m_rep1	AGTAGCTTCCACCTGT-1	327	Oligo NN	327 Oligo NN	31	OPC-Oligo	31 OPC-Oligo
12m_rep1	AGTAGCTTCCGGAACC-1	16	CA1-ProS Glut	016 CA1-ProS Glut	1	IT-ET Glut	01 IT-ET Glut
12m_rep1	AGTAGCTTCCTAGTTT-1	16	CA1-ProS Glut	016 CA1-ProS Glut	1	IT-ET Glut	01 IT-ET Glut
12m_rep1	AGTAGCTTCGATTTGA-1	327	Oligo NN	327 Oligo NN	31	OPC-Oligo	31 OPC-Oligo
12m_rep1	AGTAGCTTCTAACTGA-1	327	Oligo NN	327 Oligo NN	31	OPC-Oligo	31 OPC-Oligo
12m_rep1	AGTAGGATCCGCATGA-1	165	PAG-MRN Pou3f1 Glut	165 PAG-MRN Pou3f1 Glut	19	MB Glut	19 MB Glut
12m_rep1	AGTAGGATCCTTAAGA-1	327	Oligo NN	327 Oligo NN	31	OPC-Oligo	31 OPC-Oligo
12m_rep1	AGTAGGATCCTTAGGG-1	327	Oligo NN	327 Oligo NN	31	OPC-Oligo	31 OPC-Oligo
12m_rep1	AGTATAGCAAACTCAT-1	135	STN-PSTN Pitx2 Glut	135 STN-PSTN Pitx2 Glut	14	HY Glut	14 HY Glut
12m_rep1	AGTATAGCACAGGATG-1	197	SNr Six3 Gaba	197 SNr Six3 Gaba	20	MB GABA	20 MB GABA
12m_rep1	AGTATAGCATGTTGTG-1	197	SNr Six3 Gaba	197 SNr Six3 Gaba	20	MB GABA	20 MB GABA
12m_rep1	AGTCAAGAGAGAGGCT-1	327	Oligo NN	327 Oligo NN	31	OPC-Oligo	31 OPC-Oligo
12m_rep1	AGTCAAGAGCGCATTG-1	327	Oligo NN	327 Oligo NN	31	OPC-Oligo	31 OPC-Oligo
12m_rep1	AGTCAAGAGGAAACTG-1	327	Oligo NN	327 Oligo NN	31	OPC-Oligo	31 OPC-Oligo
12m_rep1	AGTCAAGAGGGATGCG-1	327	Oligo NN	327 Oligo NN	31	OPC-Oligo	31 OPC-Oligo
12m_rep1	AGTCAAGAGTAATCCA-1	16	CA1-ProS Glut	016 CA1-ProS Glut	1	IT-ET Glut	01 IT-ET Glut
12m_rep1	AGTCAATGTCAAGTAT-1	195	SNr-VTA Pax5 Npas1 Gaba	195 SNr-VTA Pax5 Npas1 Gaba	20	MB GABA	20 MB GABA
12m_rep1	AGTCAATGTCGTTATC-1	327	Oligo NN	327 Oligo NN	31	OPC-Oligo	31 OPC-Oligo
12m_rep1	AGTCAATGTGCATCGG-1	197	SNr Six3 Gaba	197 SNr Six3 Gaba	20	MB GABA	20 MB GABA
12m_rep1	AGTCAATGTGTTTGAG-1	327	Oligo NN	327 Oligo NN	31	OPC-Oligo	31 OPC-Oligo
12m_rep1	AGTCAATGTTCAAGAT-1	215	SNc-VTA-RAmb Foxa1 Dopa	215 SNc-VTA-RAmb Foxa1 Dopa	21	MB Dopa	21 MB Dopa
12m_rep1	AGTCAATGTTTACCGT-1	327	Oligo NN	327 Oligo NN	31	OPC-Oligo	31 OPC-Oligo
12m_rep1	AGTCAATGTTTGTTGC-1	327	Oligo NN	327 Oligo NN	31	OPC-Oligo	31 OPC-Oligo
12m_rep1	AGTCAGGCACGTTACA-1	327	Oligo NN	327 Oligo NN	31	OPC-Oligo	31 OPC-Oligo
12m_rep1	AGTCAGGCAGGTTACC-1	327	Oligo NN	327 Oligo NN	31	OPC-Oligo	31 OPC-Oligo
12m_rep1	AGTCCTTGTCAGTAAT-1	327	Oligo NN	327 Oligo NN	31	OPC-Oligo	31 OPC-Oligo
12m_rep1	AGTCCTTGTGTTTCAC-1	101	ZI Pax6 Gaba	101 ZI Pax6 Gaba	12	HY GABA	12 HY GABA
12m_rep1	AGTCCTTGTTACTTCA-1	327	Oligo NN	327 Oligo NN	31	OPC-Oligo	31 OPC-Oligo
12m_rep1	AGTCCTTGTTAGTGAT-1	16	CA1-ProS Glut	016 CA1-ProS Glut	1	IT-ET Glut	01 IT-ET Glut
12m_rep1	AGTCCTTGTTGCGGAT-1	327	Oligo NN	327 Oligo NN	31	OPC-Oligo	31 OPC-Oligo
12m_rep1	AGTCCTTGTTGTTCAC-1	327	Oligo NN	327 Oligo NN	31	OPC-Oligo	31 OPC-Oligo
12m_rep1	AGTCGCATCCCTCAAC-1	197	SNr Six3 Gaba	197 SNr Six3 Gaba	20	MB GABA	20 MB GABA
12m_rep1	AGTCGCATCTAACTGA-1	327	Oligo NN	327 Oligo NN	31	OPC-Oligo	31 OPC-Oligo
12m_rep1	AGTCTTGCAACTAACT-1	327	Oligo NN	327 Oligo NN	31	OPC-Oligo	31 OPC-Oligo
12m_rep1	AGTCTTGCAACTGGCT-1	16	CA1-ProS Glut	016 CA1-ProS Glut	1	IT-ET Glut	01 IT-ET Glut
12m_rep1	AGTCTTGCAAGGTCGA-1	334	Microglia NN	334 Microglia NN	34	Immune	34 Immune
12m_rep1	AGTCTTGCACATTAAC-1	327	Oligo NN	327 Oligo NN	31	OPC-Oligo	31 OPC-Oligo
12m_rep1	AGTCTTGCACCAAAGG-1	327	Oligo NN	327 Oligo NN	31	OPC-Oligo	31 OPC-Oligo
12m_rep1	AGTCTTGCAGAGGCTA-1	156	MB-ant-ve Dmrta2 Glut	156 MB-ant-ve Dmrta2 Glut	19	MB Glut	19 MB Glut
12m_rep1	AGTCTTGCATTAAGTC-1	135	STN-PSTN Pitx2 Glut	135 STN-PSTN Pitx2 Glut	14	HY Glut	14 HY Glut
12m_rep1	AGTGAACCATGATTGT-1	138	PH Pitx2 Glut	138 PH Pitx2 Glut	14	HY Glut	14 HY Glut
12m_rep1	AGTGAGTCAAGGTAAC-1	327	Oligo NN	327 Oligo NN	31	OPC-Oligo	31 OPC-Oligo
12m_rep1	AGTGAGTCAGAAATTG-1	318	Astro-NT NN	318 Astro-NT NN	30	Astro-Epen	30 Astro-Epen
12m_rep1	AGTGAGTCATAGCTGC-1	197	SNr Six3 Gaba	197 SNr Six3 Gaba	20	MB GABA	20 MB GABA
12m_rep1	AGTGAGTCATGGCCCA-1	327	Oligo NN	327 Oligo NN	31	OPC-Oligo	31 OPC-Oligo
12m_rep1	AGTGAGTCATTAGGCC-1	327	Oligo NN	327 Oligo NN	31	OPC-Oligo	31 OPC-Oligo
12m_rep1	AGTGCACGTGAGGTGA-1	16	CA1-ProS Glut	016 CA1-ProS Glut	1	IT-ET Glut	01 IT-ET Glut
12m_rep1	AGTGCACGTTATTGCC-1	327	Oligo NN	327 Oligo NN	31	OPC-Oligo	31 OPC-Oligo
12m_rep1	AGTGCACGTTGAAGCC-1	139	PH-LHA Foxb1 Glut	139 PH-LHA Foxb1 Glut	14	HY Glut	14 HY Glut
12m_rep1	AGTGCACGTTGGATCA-1	327	Oligo NN	327 Oligo NN	31	OPC-Oligo	31 OPC-Oligo
12m_rep1	AGTGCCGGTATACTGG-1	135	STN-PSTN Pitx2 Glut	135 STN-PSTN Pitx2 Glut	14	HY Glut	14 HY Glut
12m_rep1	AGTGCCGGTTACGCGG-1	197	SNr Six3 Gaba	197 SNr Six3 Gaba	20	MB GABA	20 MB GABA
12m_rep1	AGTGCCGGTTGCATCT-1	197	SNr Six3 Gaba	197 SNr Six3 Gaba	20	MB GABA	20 MB GABA
12m_rep1	AGTGCGGAGGATTGCT-1	197	SNr Six3 Gaba	197 SNr Six3 Gaba	20	MB GABA	20 MB GABA
12m_rep1	AGTGCGGAGGTCTTGG-1	327	Oligo NN	327 Oligo NN	31	OPC-Oligo	31 OPC-Oligo
12m_rep1	AGTGCGGAGTGTTGCG-1	16	CA1-ProS Glut	016 CA1-ProS Glut	1	IT-ET Glut	01 IT-ET Glut
12m_rep1	AGTGGACAGCAGGTGG-1	197	SNr Six3 Gaba	197 SNr Six3 Gaba	20	MB GABA	20 MB GABA
12m_rep1	AGTGGACAGCGCTAAT-1	327	Oligo NN	327 Oligo NN	31	OPC-Oligo	31 OPC-Oligo
12m_rep1	AGTGGACAGCTACTGG-1	156	MB-ant-ve Dmrta2 Glut	156 MB-ant-ve Dmrta2 Glut	19	MB Glut	19 MB Glut
12m_rep1	AGTGGACAGTAAGAAC-1	101	ZI Pax6 Gaba	101 ZI Pax6 Gaba	12	HY GABA	12 HY GABA
12m_rep1	AGTGTGGCAATCGCAC-1	327	Oligo NN	327 Oligo NN	31	OPC-Oligo	31 OPC-Oligo
12m_rep1	AGTGTTTCAATTAACC-1	16	CA1-ProS Glut	016 CA1-ProS Glut	1	IT-ET Glut	01 IT-ET Glut
12m_rep1	AGTGTTTCATAATTGC-1	135	STN-PSTN Pitx2 Glut	135 STN-PSTN Pitx2 Glut	14	HY Glut	14 HY Glut
12m_rep1	AGTTACATCATGCCTC-1	327	Oligo NN	327 Oligo NN	31	OPC-Oligo	31 OPC-Oligo
12m_rep1	AGTTACATCGTTAGTA-1	327	Oligo NN	327 Oligo NN	31	OPC-Oligo	31 OPC-Oligo
12m_rep1	AGTTACTCAAACTCAT-1	327	Oligo NN	327 Oligo NN	31	OPC-Oligo	31 OPC-Oligo
12m_rep1	AGTTACTCAAACTGTT-1	327	Oligo NN	327 Oligo NN	31	OPC-Oligo	31 OPC-Oligo
12m_rep1	AGTTACTCATTGTCAG-1	327	Oligo NN	327 Oligo NN	31	OPC-Oligo	31 OPC-Oligo
12m_rep1	AGTTATGTCAAACACC-1	327	Oligo NN	327 Oligo NN	31	OPC-Oligo	31 OPC-Oligo
12m_rep1	AGTTATGTCACAAGCT-1	334	Microglia NN	334 Microglia NN	34	Immune	34 Immune
12m_rep1	AGTTATGTCATTAGGC-1	197	SNr Six3 Gaba	197 SNr Six3 Gaba	20	MB GABA	20 MB GABA
12m_rep1	AGTTATGTCATTTGCT-1	327	Oligo NN	327 Oligo NN	31	OPC-Oligo	31 OPC-Oligo
12m_rep1	AGTTATGTCGCAAACT-1	327	Oligo NN	327 Oligo NN	31	OPC-Oligo	31 OPC-Oligo
12m_rep1	AGTTATGTCGTGCTTC-1	327	Oligo NN	327 Oligo NN	31	OPC-Oligo	31 OPC-Oligo
12m_rep1	AGTTATGTCTGTGCCT-1	327	Oligo NN	327 Oligo NN	31	OPC-Oligo	31 OPC-Oligo
12m_rep1	AGTTGCAGTTCTTTAG-1	327	Oligo NN	327 Oligo NN	31	OPC-Oligo	31 OPC-Oligo
12m_rep1	AGTTGCGTCAAGCTTA-1	197	SNr Six3 Gaba	197 SNr Six3 Gaba	20	MB GABA	20 MB GABA
12m_rep1	AGTTGGCGTCACCTAT-1	327	Oligo NN	327 Oligo NN	31	OPC-Oligo	31 OPC-Oligo
12m_rep1	AGTTGGCGTTAATGAC-1	16	CA1-ProS Glut	016 CA1-ProS Glut	1	IT-ET Glut	01 IT-ET Glut
12m_rep1	AGTTGTCAGACAACGA-1	199	PAG-MRN-RN Foxa2 Gaba	199 PAG-MRN-RN Foxa2 Gaba	20	MB GABA	20 MB GABA
12m_rep1	AGTTGTCAGCTCCTAC-1	16	CA1-ProS Glut	016 CA1-ProS Glut	1	IT-ET Glut	01 IT-ET Glut
12m_rep1	AGTTGTCAGGAACCAA-1	327	Oligo NN	327 Oligo NN	31	OPC-Oligo	31 OPC-Oligo
12m_rep1	AGTTGTCAGGATAAAC-1	327	Oligo NN	327 Oligo NN	31	OPC-Oligo	31 OPC-Oligo
12m_rep1	AGTTGTCAGGCAATAG-1	16	CA1-ProS Glut	016 CA1-ProS Glut	1	IT-ET Glut	01 IT-ET Glut
12m_rep1	AGTTTGATCCATAATG-1	327	Oligo NN	327 Oligo NN	31	OPC-Oligo	31 OPC-Oligo
12m_rep1	AGTTTGATCCTAATTC-1	327	Oligo NN	327 Oligo NN	31	OPC-Oligo	31 OPC-Oligo
12m_rep1	AGTTTGATCGCATTAA-1	327	Oligo NN	327 Oligo NN	31	OPC-Oligo	31 OPC-Oligo
12m_rep1	AGTTTGATCGCGCTAA-1	197	SNr Six3 Gaba	197 SNr Six3 Gaba	20	MB GABA	20 MB GABA
12m_rep1	AGTTTGCAGCCACATG-1	327	Oligo NN	327 Oligo NN	31	OPC-Oligo	31 OPC-Oligo
12m_rep1	AGTTTGCAGCCGCTTT-1	327	Oligo NN	327 Oligo NN	31	OPC-Oligo	31 OPC-Oligo
12m_rep1	AGTTTGCAGGACCTTG-1	327	Oligo NN	327 Oligo NN	31	OPC-Oligo	31 OPC-Oligo
12m_rep1	AGTTTGCAGGCATTAC-1	318	Astro-NT NN	318 Astro-NT NN	30	Astro-Epen	30 Astro-Epen
12m_rep1	AGTTTGCAGGCTATGT-1	327	Oligo NN	327 Oligo NN	31	OPC-Oligo	31 OPC-Oligo
12m_rep1	AGTTTGCAGGTGAAGC-1	327	Oligo NN	327 Oligo NN	31	OPC-Oligo	31 OPC-Oligo
12m_rep1	AGTTTGCAGTACCGCA-1	327	Oligo NN	327 Oligo NN	31	OPC-Oligo	31 OPC-Oligo
12m_rep1	AGTTTGCAGTGAGGTA-1	195	SNr-VTA Pax5 Npas1 Gaba	195 SNr-VTA Pax5 Npas1 Gaba	20	MB GABA	20 MB GABA
12m_rep1	ATAACGACAAACCTTG-1	327	Oligo NN	327 Oligo NN	31	OPC-Oligo	31 OPC-Oligo
12m_rep1	ATAACGACAAACTCAT-1	168	SPA-SPFm-SPFp-POL-PIL-PoT Sp9 Glut	168 SPA-SPFm-SPFp-POL-PIL-PoT Sp9 Glut	19	MB Glut	19 MB Glut
12m_rep1	ATAACGACAATAACCT-1	327	Oligo NN	327 Oligo NN	31	OPC-Oligo	31 OPC-Oligo
12m_rep1	ATAACGACACAGCCTG-1	327	Oligo NN	327 Oligo NN	31	OPC-Oligo	31 OPC-Oligo
12m_rep1	ATAACGACACCCACAG-1	327	Oligo NN	327 Oligo NN	31	OPC-Oligo	31 OPC-Oligo
12m_rep1	ATAACGACACCTATAG-1	327	Oligo NN	327 Oligo NN	31	OPC-Oligo	31 OPC-Oligo
12m_rep1	ATAACGACACCTGCTC-1	327	Oligo NN	327 Oligo NN	31	OPC-Oligo	31 OPC-Oligo
12m_rep1	ATAACGACAGCCAGAA-1	327	Oligo NN	327 Oligo NN	31	OPC-Oligo	31 OPC-Oligo
12m_rep1	ATAAGCCTCCCTGGTT-1	327	Oligo NN	327 Oligo NN	31	OPC-Oligo	31 OPC-Oligo
12m_rep1	ATAAGCCTCGTCCTTA-1	213	SCsg Gabrr2 Gaba	213 SCsg Gabrr2 Gaba	20	MB GABA	20 MB GABA
12m_rep1	ATAAGCCTCTAATCAG-1	327	Oligo NN	327 Oligo NN	31	OPC-Oligo	31 OPC-Oligo
12m_rep1	ATAAGCCTCTTTGACT-1	327	Oligo NN	327 Oligo NN	31	OPC-Oligo	31 OPC-Oligo
12m_rep1	ATAAGTCGTCCTTAGT-1	327	Oligo NN	327 Oligo NN	31	OPC-Oligo	31 OPC-Oligo
12m_rep1	ATAAGTCGTGCTGGTG-1	327	Oligo NN	327 Oligo NN	31	OPC-Oligo	31 OPC-Oligo
12m_rep1	ATAAGTCGTGTTTCAC-1	197	SNr Six3 Gaba	197 SNr Six3 Gaba	20	MB GABA	20 MB GABA
12m_rep1	ATAATGGCAATAATGG-1	101	ZI Pax6 Gaba	101 ZI Pax6 Gaba	12	HY GABA	12 HY GABA
12m_rep1	ATAATGGCAGCAACCT-1	327	Oligo NN	327 Oligo NN	31	OPC-Oligo	31 OPC-Oligo
12m_rep1	ATACCGGTCAGTATTG-1	327	Oligo NN	327 Oligo NN	31	OPC-Oligo	31 OPC-Oligo
12m_rep1	ATACCGGTCATGCGTG-1	327	Oligo NN	327 Oligo NN	31	OPC-Oligo	31 OPC-Oligo
12m_rep1	ATACCGGTCCAATTAG-1	327	Oligo NN	327 Oligo NN	31	OPC-Oligo	31 OPC-Oligo
12m_rep1	ATACCGGTCGGTACGC-1	327	Oligo NN	327 Oligo NN	31	OPC-Oligo	31 OPC-Oligo
12m_rep1	ATACCGGTCGTACCGA-1	101	ZI Pax6 Gaba	101 ZI Pax6 Gaba	12	HY GABA	12 HY GABA
12m_rep1	ATACCTGCAACCTGGT-1	327	Oligo NN	327 Oligo NN	31	OPC-Oligo	31 OPC-Oligo
12m_rep1	ATACCTGCAACTGGGA-1	197	SNr Six3 Gaba	197 SNr Six3 Gaba	20	MB GABA	20 MB GABA
12m_rep1	ATACCTGCAAGACTCC-1	327	Oligo NN	327 Oligo NN	31	OPC-Oligo	31 OPC-Oligo
12m_rep1	ATACCTGCAATAATGG-1	327	Oligo NN	327 Oligo NN	31	OPC-Oligo	31 OPC-Oligo
12m_rep1	ATACCTGCACAGAAAC-1	135	STN-PSTN Pitx2 Glut	135 STN-PSTN Pitx2 Glut	14	HY Glut	14 HY Glut
12m_rep1	ATACCTGCACTGGCCA-1	327	Oligo NN	327 Oligo NN	31	OPC-Oligo	31 OPC-Oligo
12m_rep1	ATACCTGCAGGCTAGA-1	156	MB-ant-ve Dmrta2 Glut	156 MB-ant-ve Dmrta2 Glut	19	MB Glut	19 MB Glut
12m_rep1	ATACCTGCAGTTTACG-1	93	RT-ZI Gnb3 Gaba	093 RT-ZI Gnb3 Gaba	12	HY GABA	12 HY GABA
12m_rep1	ATACCTGCATTCAGCA-1	327	Oligo NN	327 Oligo NN	31	OPC-Oligo	31 OPC-Oligo
12m_rep1	ATAGATGCAACAACAA-1	197	SNr Six3 Gaba	197 SNr Six3 Gaba	20	MB GABA	20 MB GABA
12m_rep1	ATAGATGCACAGAACG-1	16	CA1-ProS Glut	016 CA1-ProS Glut	1	IT-ET Glut	01 IT-ET Glut
12m_rep1	ATAGATGCACTCGCTC-1	327	Oligo NN	327 Oligo NN	31	OPC-Oligo	31 OPC-Oligo
12m_rep1	ATAGATGCACTGACCG-1	327	Oligo NN	327 Oligo NN	31	OPC-Oligo	31 OPC-Oligo
12m_rep1	ATAGATGCAGAAATTG-1	327	Oligo NN	327 Oligo NN	31	OPC-Oligo	31 OPC-Oligo
12m_rep1	ATAGATGCAGATAGAC-1	327	Oligo NN	327 Oligo NN	31	OPC-Oligo	31 OPC-Oligo
12m_rep1	ATAGATGCATTAGCCA-1	327	Oligo NN	327 Oligo NN	31	OPC-Oligo	31 OPC-Oligo
12m_rep1	ATAGCATGTAGCTGGT-1	327	Oligo NN	327 Oligo NN	31	OPC-Oligo	31 OPC-Oligo
12m_rep1	ATAGCATGTCGCATAA-1	168	SPA-SPFm-SPFp-POL-PIL-PoT Sp9 Glut	168 SPA-SPFm-SPFp-POL-PIL-PoT Sp9 Glut	19	MB Glut	19 MB Glut
12m_rep1	ATAGCATGTTACCGGG-1	197	SNr Six3 Gaba	197 SNr Six3 Gaba	20	MB GABA	20 MB GABA
12m_rep1	ATAGCATGTTCCTGAT-1	334	Microglia NN	334 Microglia NN	34	Immune	34 Immune
12m_rep1	ATAGCATGTTTGGGTA-1	327	Oligo NN	327 Oligo NN	31	OPC-Oligo	31 OPC-Oligo
12m_rep1	ATAGGTACAAATTGCT-1	327	Oligo NN	327 Oligo NN	31	OPC-Oligo	31 OPC-Oligo
12m_rep1	ATAGGTACATCATGGC-1	101	ZI Pax6 Gaba	101 ZI Pax6 Gaba	12	HY GABA	12 HY GABA
12m_rep1	ATAGGTACATGCTATG-1	327	Oligo NN	327 Oligo NN	31	OPC-Oligo	31 OPC-Oligo
12m_rep1	ATAGGTACATTGTTGG-1	327	Oligo NN	327 Oligo NN	31	OPC-Oligo	31 OPC-Oligo
12m_rep1	ATATAGGCAAGTGTTT-1	101	ZI Pax6 Gaba	101 ZI Pax6 Gaba	12	HY GABA	12 HY GABA
12m_rep1	ATATAGGCAATCATGT-1	327	Oligo NN	327 Oligo NN	31	OPC-Oligo	31 OPC-Oligo
12m_rep1	ATATAGGCACAACAAA-1	101	ZI Pax6 Gaba	101 ZI Pax6 Gaba	12	HY GABA	12 HY GABA
12m_rep1	ATATAGGCATTGTCCT-1	327	Oligo NN	327 Oligo NN	31	OPC-Oligo	31 OPC-Oligo
12m_rep1	ATATGCATCGCACACA-1	195	SNr-VTA Pax5 Npas1 Gaba	195 SNr-VTA Pax5 Npas1 Gaba	20	MB GABA	20 MB GABA
12m_rep1	ATATGCTCAATTAACC-1	318	Astro-NT NN	318 Astro-NT NN	30	Astro-Epen	30 Astro-Epen
12m_rep1	ATATGCTCACAACAAA-1	334	Microglia NN	334 Microglia NN	34	Immune	34 Immune
12m_rep1	ATATGCTCAGCAAATA-1	327	Oligo NN	327 Oligo NN	31	OPC-Oligo	31 OPC-Oligo
12m_rep1	ATATGCTCAGTACCGT-1	327	Oligo NN	327 Oligo NN	31	OPC-Oligo	31 OPC-Oligo
12m_rep1	ATATGCTCATTTAAGC-1	327	Oligo NN	327 Oligo NN	31	OPC-Oligo	31 OPC-Oligo
12m_rep1	ATATGGTGTGATGAAA-1	213	SCsg Gabrr2 Gaba	213 SCsg Gabrr2 Gaba	20	MB GABA	20 MB GABA
12m_rep1	ATATGGTGTGTCCTGC-1	16	CA1-ProS Glut	016 CA1-ProS Glut	1	IT-ET Glut	01 IT-ET Glut
12m_rep1	ATATGGTGTTATTGCC-1	197	SNr Six3 Gaba	197 SNr Six3 Gaba	20	MB GABA	20 MB GABA
12m_rep1	ATATGGTGTTGTGACA-1	327	Oligo NN	327 Oligo NN	31	OPC-Oligo	31 OPC-Oligo
12m_rep1	ATATGGTGTTTGGCGG-1	197	SNr Six3 Gaba	197 SNr Six3 Gaba	20	MB GABA	20 MB GABA
12m_rep1	ATATGTCCAACACCTA-1	197	SNr Six3 Gaba	197 SNr Six3 Gaba	20	MB GABA	20 MB GABA
12m_rep1	ATATGTCCAATAGTCT-1	327	Oligo NN	327 Oligo NN	31	OPC-Oligo	31 OPC-Oligo
12m_rep1	ATATGTCCACTTCATC-1	327	Oligo NN	327 Oligo NN	31	OPC-Oligo	31 OPC-Oligo
12m_rep1	ATCAAGACAAACAACA-1	327	Oligo NN	327 Oligo NN	31	OPC-Oligo	31 OPC-Oligo
12m_rep1	ATCAAGACAATCCTGA-1	197	SNr Six3 Gaba	197 SNr Six3 Gaba	20	MB GABA	20 MB GABA
12m_rep1	ATCAAGACAGCAAATA-1	197	SNr Six3 Gaba	197 SNr Six3 Gaba	20	MB GABA	20 MB GABA
12m_rep1	ATCAAGCTCATCAGTA-1	327	Oligo NN	327 Oligo NN	31	OPC-Oligo	31 OPC-Oligo
12m_rep1	ATCAAGCTCATGGTGT-1	327	Oligo NN	327 Oligo NN	31	OPC-Oligo	31 OPC-Oligo
12m_rep1	ATCAAGCTCGCATTAA-1	135	STN-PSTN Pitx2 Glut	135 STN-PSTN Pitx2 Glut	14	HY Glut	14 HY Glut
12m_rep1	ATCAAGCTCGTTTCTG-1	327	Oligo NN	327 Oligo NN	31	OPC-Oligo	31 OPC-Oligo
12m_rep1	ATCAAGCTCTAAGGAG-1	139	PH-LHA Foxb1 Glut	139 PH-LHA Foxb1 Glut	14	HY Glut	14 HY Glut
12m_rep1	ATCAATCCAACAACAA-1	197	SNr Six3 Gaba	197 SNr Six3 Gaba	20	MB GABA	20 MB GABA
12m_rep1	ATCAATCCACAAACTT-1	334	Microglia NN	334 Microglia NN	34	Immune	34 Immune
12m_rep1	ATCAATCCACAGGGAC-1	327	Oligo NN	327 Oligo NN	31	OPC-Oligo	31 OPC-Oligo
12m_rep1	ATCAATCCACCTGCTC-1	197	SNr Six3 Gaba	197 SNr Six3 Gaba	20	MB GABA	20 MB GABA
12m_rep1	ATCAATCCACGTAATT-1	327	Oligo NN	327 Oligo NN	31	OPC-Oligo	31 OPC-Oligo
12m_rep1	ATCAATCCAGTAGCCT-1	327	Oligo NN	327 Oligo NN	31	OPC-Oligo	31 OPC-Oligo
12m_rep1	ATCAATCCATAGACTT-1	327	Oligo NN	327 Oligo NN	31	OPC-Oligo	31 OPC-Oligo
12m_rep1	ATCAATCCATTGTGGC-1	16	CA1-ProS Glut	016 CA1-ProS Glut	1	IT-ET Glut	01 IT-ET Glut
12m_rep1	ATCACAATCAATAGCC-1	327	Oligo NN	327 Oligo NN	31	OPC-Oligo	31 OPC-Oligo
12m_rep1	ATCACAATCATGACCG-1	327	Oligo NN	327 Oligo NN	31	OPC-Oligo	31 OPC-Oligo
12m_rep1	ATCACAATCATTGCGG-1	156	MB-ant-ve Dmrta2 Glut	156 MB-ant-ve Dmrta2 Glut	19	MB Glut	19 MB Glut
12m_rep1	ATCACAATCCCTGGAA-1	327	Oligo NN	327 Oligo NN	31	OPC-Oligo	31 OPC-Oligo
12m_rep1	ATCACAATCCGGTTAG-1	327	Oligo NN	327 Oligo NN	31	OPC-Oligo	31 OPC-Oligo
12m_rep1	ATCACAATCCTCATGC-1	327	Oligo NN	327 Oligo NN	31	OPC-Oligo	31 OPC-Oligo
12m_rep1	ATCACAATCGGCTAGC-1	16	CA1-ProS Glut	016 CA1-ProS Glut	1	IT-ET Glut	01 IT-ET Glut
12m_rep1	ATCACAATCTACTAAG-1	327	Oligo NN	327 Oligo NN	31	OPC-Oligo	31 OPC-Oligo
12m_rep1	ATCACACAGCAAGGAC-1	318	Astro-NT NN	318 Astro-NT NN	30	Astro-Epen	30 Astro-Epen
12m_rep1	ATCACACAGGAACCGG-1	138	PH Pitx2 Glut	138 PH Pitx2 Glut	14	HY Glut	14 HY Glut
12m_rep1	ATCACACAGGCGAATA-1	327	Oligo NN	327 Oligo NN	31	OPC-Oligo	31 OPC-Oligo
12m_rep1	ATCACACAGTAAAGGT-1	318	Astro-NT NN	318 Astro-NT NN	30	Astro-Epen	30 Astro-Epen
12m_rep1	ATCACACAGTGGCGGA-1	197	SNr Six3 Gaba	197 SNr Six3 Gaba	20	MB GABA	20 MB GABA
12m_rep1	ATCACACAGTTAGAGG-1	327	Oligo NN	327 Oligo NN	31	OPC-Oligo	31 OPC-Oligo
12m_rep1	ATCACCCTCCCGTTAC-1	327	Oligo NN	327 Oligo NN	31	OPC-Oligo	31 OPC-Oligo
12m_rep1	ATCACCCTCTCATCAT-1	327	Oligo NN	327 Oligo NN	31	OPC-Oligo	31 OPC-Oligo
12m_rep1	ATCACTAAGAAACTGG-1	135	STN-PSTN Pitx2 Glut	135 STN-PSTN Pitx2 Glut	14	HY Glut	14 HY Glut
12m_rep1	ATCACTAAGCATTAGC-1	327	Oligo NN	327 Oligo NN	31	OPC-Oligo	31 OPC-Oligo
12m_rep1	ATCACTAAGCCACATG-1	197	SNr Six3 Gaba	197 SNr Six3 Gaba	20	MB GABA	20 MB GABA
12m_rep1	ATCACTAAGCCTAACG-1	327	Oligo NN	327 Oligo NN	31	OPC-Oligo	31 OPC-Oligo
12m_rep1	ATCACTAAGCCTAATA-1	327	Oligo NN	327 Oligo NN	31	OPC-Oligo	31 OPC-Oligo
12m_rep1	ATCACTAAGTAGAGGC-1	327	Oligo NN	327 Oligo NN	31	OPC-Oligo	31 OPC-Oligo
12m_rep1	ATCACTAAGTTTCCGC-1	327	Oligo NN	327 Oligo NN	31	OPC-Oligo	31 OPC-Oligo
12m_rep1	ATCAGGTTCAGCTAAC-1	327	Oligo NN	327 Oligo NN	31	OPC-Oligo	31 OPC-Oligo
12m_rep1	ATCAGGTTCCCATAAA-1	326	OPC NN	326 OPC NN	31	OPC-Oligo	31 OPC-Oligo
12m_rep1	ATCAGGTTCTCAATGA-1	327	Oligo NN	327 Oligo NN	31	OPC-Oligo	31 OPC-Oligo
12m_rep1	ATCATCAAGCAACATC-1	326	OPC NN	326 OPC NN	31	OPC-Oligo	31 OPC-Oligo
12m_rep1	ATCATCAAGTATCGCG-1	197	SNr Six3 Gaba	197 SNr Six3 Gaba	20	MB GABA	20 MB GABA
12m_rep1	ATCATGTCAATGAAGC-1	327	Oligo NN	327 Oligo NN	31	OPC-Oligo	31 OPC-Oligo
12m_rep1	ATCATGTCATCAGCAC-1	16	CA1-ProS Glut	016 CA1-ProS Glut	1	IT-ET Glut	01 IT-ET Glut
12m_rep1	ATCCAACAGAAAGGAA-1	197	SNr Six3 Gaba	197 SNr Six3 Gaba	20	MB GABA	20 MB GABA
12m_rep1	ATCCAACAGCGCCTTT-1	327	Oligo NN	327 Oligo NN	31	OPC-Oligo	31 OPC-Oligo
12m_rep1	ATCCAACAGCTAAGTC-1	16	CA1-ProS Glut	016 CA1-ProS Glut	1	IT-ET Glut	01 IT-ET Glut
12m_rep1	ATCCACCTCACGTTAA-1	327	Oligo NN	327 Oligo NN	31	OPC-Oligo	31 OPC-Oligo
12m_rep1	ATCCACCTCGAAGCGG-1	327	Oligo NN	327 Oligo NN	31	OPC-Oligo	31 OPC-Oligo
12m_rep1	ATCCACCTCGTGCTTC-1	327	Oligo NN	327 Oligo NN	31	OPC-Oligo	31 OPC-Oligo
12m_rep1	ATCCACCTCGTTATAG-1	197	SNr Six3 Gaba	197 SNr Six3 Gaba	20	MB GABA	20 MB GABA
12m_rep1	ATCCATAAGAAACTGG-1	197	SNr Six3 Gaba	197 SNr Six3 Gaba	20	MB GABA	20 MB GABA
12m_rep1	ATCCATAAGCCAGTAT-1	327	Oligo NN	327 Oligo NN	31	OPC-Oligo	31 OPC-Oligo
12m_rep1	ATCCATAAGCGGCTGT-1	197	SNr Six3 Gaba	197 SNr Six3 Gaba	20	MB GABA	20 MB GABA
12m_rep1	ATCCATAAGTGTTGCG-1	135	STN-PSTN Pitx2 Glut	135 STN-PSTN Pitx2 Glut	14	HY Glut	14 HY Glut
12m_rep1	ATCCCGCGTCAAGTGC-1	327	Oligo NN	327 Oligo NN	31	OPC-Oligo	31 OPC-Oligo
12m_rep1	ATCCCGCGTGAGGTGA-1	135	STN-PSTN Pitx2 Glut	135 STN-PSTN Pitx2 Glut	14	HY Glut	14 HY Glut
12m_rep1	ATCCCGCGTGTGAGAG-1	197	SNr Six3 Gaba	197 SNr Six3 Gaba	20	MB GABA	20 MB GABA
12m_rep1	ATCCCGCGTTCAAGCA-1	327	Oligo NN	327 Oligo NN	31	OPC-Oligo	31 OPC-Oligo
12m_rep1	ATCCGTGAGCTATATG-1	135	STN-PSTN Pitx2 Glut	135 STN-PSTN Pitx2 Glut	14	HY Glut	14 HY Glut
12m_rep1	ATCCGTGAGGCCTGGT-1	197	SNr Six3 Gaba	197 SNr Six3 Gaba	20	MB GABA	20 MB GABA
12m_rep1	ATCCGTGAGGGCTTTG-1	327	Oligo NN	327 Oligo NN	31	OPC-Oligo	31 OPC-Oligo
12m_rep1	ATCCGTGAGTCACCAG-1	166	MRN Pou3f1 C1ql4 Glut	166 MRN Pou3f1 C1ql4 Glut	19	MB Glut	19 MB Glut
12m_rep1	ATCCGTGAGTTACCGG-1	197	SNr Six3 Gaba	197 SNr Six3 Gaba	20	MB GABA	20 MB GABA
12m_rep1	ATCCGTGAGTTATGGC-1	334	Microglia NN	334 Microglia NN	34	Immune	34 Immune
12m_rep1	ATCCTGACAATAATGG-1	135	STN-PSTN Pitx2 Glut	135 STN-PSTN Pitx2 Glut	14	HY Glut	14 HY Glut
12m_rep1	ATCCTGACAATTGAGA-1	195	SNr-VTA Pax5 Npas1 Gaba	195 SNr-VTA Pax5 Npas1 Gaba	20	MB GABA	20 MB GABA
12m_rep1	ATCCTGACACCTACTT-1	334	Microglia NN	334 Microglia NN	34	Immune	34 Immune
12m_rep1	ATCCTGACAGCAAGAT-1	215	SNc-VTA-RAmb Foxa1 Dopa	215 SNc-VTA-RAmb Foxa1 Dopa	21	MB Dopa	21 MB Dopa
12m_rep1	ATCCTGACAGTTATCG-1	327	Oligo NN	327 Oligo NN	31	OPC-Oligo	31 OPC-Oligo
12m_rep1	ATCCTGACATCCTAGA-1	327	Oligo NN	327 Oligo NN	31	OPC-Oligo	31 OPC-Oligo
12m_rep1	ATCCTTAGTTAACACG-1	93	RT-ZI Gnb3 Gaba	093 RT-ZI Gnb3 Gaba	12	HY GABA	12 HY GABA
12m_rep1	ATCCTTAGTTACATCC-1	197	SNr Six3 Gaba	197 SNr Six3 Gaba	20	MB GABA	20 MB GABA
12m_rep1	ATCGAGGCAACAGGTG-1	327	Oligo NN	327 Oligo NN	31	OPC-Oligo	31 OPC-Oligo
12m_rep1	ATCGAGGCAACTAGCC-1	101	ZI Pax6 Gaba	101 ZI Pax6 Gaba	12	HY GABA	12 HY GABA
12m_rep1	ATCGAGGCAATTGAAG-1	327	Oligo NN	327 Oligo NN	31	OPC-Oligo	31 OPC-Oligo
12m_rep1	ATCGAGGCACCTCGCT-1	327	Oligo NN	327 Oligo NN	31	OPC-Oligo	31 OPC-Oligo
12m_rep1	ATCGAGGCATAAAGCA-1	327	Oligo NN	327 Oligo NN	31	OPC-Oligo	31 OPC-Oligo
12m_rep1	ATCGAGGCATAGGCGA-1	135	STN-PSTN Pitx2 Glut	135 STN-PSTN Pitx2 Glut	14	HY Glut	14 HY Glut
12m_rep1	ATCGCCCGTCTTACTA-1	327	Oligo NN	327 Oligo NN	31	OPC-Oligo	31 OPC-Oligo
12m_rep1	ATCGCCCGTGCTGTAA-1	327	Oligo NN	327 Oligo NN	31	OPC-Oligo	31 OPC-Oligo
12m_rep1	ATCGCCCGTTCCATTA-1	327	Oligo NN	327 Oligo NN	31	OPC-Oligo	31 OPC-Oligo
12m_rep1	ATCGCTTGTTCGCGCT-1	327	Oligo NN	327 Oligo NN	31	OPC-Oligo	31 OPC-Oligo
12m_rep1	ATCGCTTGTTGTTCAC-1	101	ZI Pax6 Gaba	101 ZI Pax6 Gaba	12	HY GABA	12 HY GABA
12m_rep1	ATCGGCCAGGACACTT-1	197	SNr Six3 Gaba	197 SNr Six3 Gaba	20	MB GABA	20 MB GABA
12m_rep1	ATCGGCCAGGAGGACT-1	327	Oligo NN	327 Oligo NN	31	OPC-Oligo	31 OPC-Oligo
12m_rep1	ATCGGCCAGGGATGCG-1	327	Oligo NN	327 Oligo NN	31	OPC-Oligo	31 OPC-Oligo
12m_rep1	ATCGGCCAGGTCATTA-1	101	ZI Pax6 Gaba	101 ZI Pax6 Gaba	12	HY GABA	12 HY GABA
12m_rep1	ATCTATGAGCACTTGG-1	135	STN-PSTN Pitx2 Glut	135 STN-PSTN Pitx2 Glut	14	HY Glut	14 HY Glut
12m_rep1	ATCTTTGGTATTTGGG-1	327	Oligo NN	327 Oligo NN	31	OPC-Oligo	31 OPC-Oligo
12m_rep1	ATCTTTGGTCATGCAA-1	327	Oligo NN	327 Oligo NN	31	OPC-Oligo	31 OPC-Oligo
12m_rep1	ATCTTTGGTGTGCACG-1	327	Oligo NN	327 Oligo NN	31	OPC-Oligo	31 OPC-Oligo
12m_rep1	ATCTTTGGTTACTTGC-1	139	PH-LHA Foxb1 Glut	139 PH-LHA Foxb1 Glut	14	HY Glut	14 HY Glut
12m_rep1	ATCTTTGGTTGTGATG-1	326	OPC NN	326 OPC NN	31	OPC-Oligo	31 OPC-Oligo
12m_rep1	ATGAAGCCACTAGCGT-1	197	SNr Six3 Gaba	197 SNr Six3 Gaba	20	MB GABA	20 MB GABA
12m_rep1	ATGAAGCCACTGGCCA-1	334	Microglia NN	334 Microglia NN	34	Immune	34 Immune
12m_rep1	ATGAAGCCATGTCAAT-1	327	Oligo NN	327 Oligo NN	31	OPC-Oligo	31 OPC-Oligo
12m_rep1	ATGAAGCCATGTCGCG-1	101	ZI Pax6 Gaba	101 ZI Pax6 Gaba	12	HY GABA	12 HY GABA
12m_rep1	ATGAAGCCATTTAAGC-1	197	SNr Six3 Gaba	197 SNr Six3 Gaba	20	MB GABA	20 MB GABA
12m_rep1	ATGAAGTAGCACGTTG-1	327	Oligo NN	327 Oligo NN	31	OPC-Oligo	31 OPC-Oligo
12m_rep1	ATGAAGTAGCATGTCG-1	135	STN-PSTN Pitx2 Glut	135 STN-PSTN Pitx2 Glut	14	HY Glut	14 HY Glut
12m_rep1	ATGAAGTAGCCGCAGT-1	327	Oligo NN	327 Oligo NN	31	OPC-Oligo	31 OPC-Oligo
12m_rep1	ATGAAGTAGGCATTAC-1	327	Oligo NN	327 Oligo NN	31	OPC-Oligo	31 OPC-Oligo
12m_rep1	ATGAAGTAGGCGCTAC-1	156	MB-ant-ve Dmrta2 Glut	156 MB-ant-ve Dmrta2 Glut	19	MB Glut	19 MB Glut
12m_rep1	ATGAAGTAGGTCAAAG-1	139	PH-LHA Foxb1 Glut	139 PH-LHA Foxb1 Glut	14	HY Glut	14 HY Glut
12m_rep1	ATGAAGTAGGTTTACA-1	327	Oligo NN	327 Oligo NN	31	OPC-Oligo	31 OPC-Oligo
12m_rep1	ATGAAGTAGTCTGGGC-1	168	SPA-SPFm-SPFp-POL-PIL-PoT Sp9 Glut	168 SPA-SPFm-SPFp-POL-PIL-PoT Sp9 Glut	19	MB Glut	19 MB Glut
12m_rep1	ATGAATGCAACCCTAA-1	327	Oligo NN	327 Oligo NN	31	OPC-Oligo	31 OPC-Oligo
12m_rep1	ATGAATGCACAGGGAC-1	327	Oligo NN	327 Oligo NN	31	OPC-Oligo	31 OPC-Oligo
12m_rep1	ATGAATGCATAGTCAT-1	327	Oligo NN	327 Oligo NN	31	OPC-Oligo	31 OPC-Oligo
12m_rep1	ATGAATGCATTATGCG-1	327	Oligo NN	327 Oligo NN	31	OPC-Oligo	31 OPC-Oligo
12m_rep1	ATGAATGCATTCAGCA-1	327	Oligo NN	327 Oligo NN	31	OPC-Oligo	31 OPC-Oligo
12m_rep1	ATGACAACAACTAGGG-1	101	ZI Pax6 Gaba	101 ZI Pax6 Gaba	12	HY GABA	12 HY GABA
12m_rep1	ATGACAACAAGACTCC-1	197	SNr Six3 Gaba	197 SNr Six3 Gaba	20	MB GABA	20 MB GABA
12m_rep1	ATGACAACACCTAAGC-1	16	CA1-ProS Glut	016 CA1-ProS Glut	1	IT-ET Glut	01 IT-ET Glut
12m_rep1	ATGACCAGTACGCGCA-1	139	PH-LHA Foxb1 Glut	139 PH-LHA Foxb1 Glut	14	HY Glut	14 HY Glut
12m_rep1	ATGACCAGTACTTCAC-1	197	SNr Six3 Gaba	197 SNr Six3 Gaba	20	MB GABA	20 MB GABA
12m_rep1	ATGACCAGTAGGATTT-1	327	Oligo NN	327 Oligo NN	31	OPC-Oligo	31 OPC-Oligo
12m_rep1	ATGACCAGTATTACCC-1	101	ZI Pax6 Gaba	101 ZI Pax6 Gaba	12	HY GABA	12 HY GABA
12m_rep1	ATGACCAGTCATCCTG-1	327	Oligo NN	327 Oligo NN	31	OPC-Oligo	31 OPC-Oligo
12m_rep1	ATGACCAGTGAAGCCT-1	327	Oligo NN	327 Oligo NN	31	OPC-Oligo	31 OPC-Oligo
12m_rep1	ATGACCAGTGTCCAAA-1	327	Oligo NN	327 Oligo NN	31	OPC-Oligo	31 OPC-Oligo
12m_rep1	ATGACCAGTTGCAATG-1	327	Oligo NN	327 Oligo NN	31	OPC-Oligo	31 OPC-Oligo
12m_rep1	ATGACCAGTTGTAACG-1	327	Oligo NN	327 Oligo NN	31	OPC-Oligo	31 OPC-Oligo
12m_rep1	ATGACCAGTTGTTCAC-1	16	CA1-ProS Glut	016 CA1-ProS Glut	1	IT-ET Glut	01 IT-ET Glut
12m_rep1	ATGACCAGTTTGTGGA-1	327	Oligo NN	327 Oligo NN	31	OPC-Oligo	31 OPC-Oligo
12m_rep1	ATGACGAAGACCATAC-1	197	SNr Six3 Gaba	197 SNr Six3 Gaba	20	MB GABA	20 MB GABA
12m_rep1	ATGACGAAGGCATTGT-1	327	Oligo NN	327 Oligo NN	31	OPC-Oligo	31 OPC-Oligo
12m_rep1	ATGACTCAGAACAAGT-1	135	STN-PSTN Pitx2 Glut	135 STN-PSTN Pitx2 Glut	14	HY Glut	14 HY Glut
12m_rep1	ATGACTCAGCTTAGTA-1	327	Oligo NN	327 Oligo NN	31	OPC-Oligo	31 OPC-Oligo
12m_rep1	ATGACTCAGGAGCATA-1	138	PH Pitx2 Glut	138 PH Pitx2 Glut	14	HY Glut	14 HY Glut
12m_rep1	ATGACTCAGTCATCCC-1	334	Microglia NN	334 Microglia NN	34	Immune	34 Immune
12m_rep1	ATGACTCAGTCCTGAG-1	327	Oligo NN	327 Oligo NN	31	OPC-Oligo	31 OPC-Oligo
12m_rep1	ATGAGCCGTAGGATTT-1	135	STN-PSTN Pitx2 Glut	135 STN-PSTN Pitx2 Glut	14	HY Glut	14 HY Glut
12m_rep1	ATGAGCCGTATTACCC-1	327	Oligo NN	327 Oligo NN	31	OPC-Oligo	31 OPC-Oligo
12m_rep1	ATGAGCCGTATTTGGG-1	327	Oligo NN	327 Oligo NN	31	OPC-Oligo	31 OPC-Oligo
12m_rep1	ATGAGCCGTTAGCAGC-1	101	ZI Pax6 Gaba	101 ZI Pax6 Gaba	12	HY GABA	12 HY GABA
12m_rep1	ATGATGACAAGGTCGA-1	327	Oligo NN	327 Oligo NN	31	OPC-Oligo	31 OPC-Oligo
12m_rep1	ATGATGACAAGTTATC-1	327	Oligo NN	327 Oligo NN	31	OPC-Oligo	31 OPC-Oligo
12m_rep1	ATGATGGAGCAAGACA-1	327	Oligo NN	327 Oligo NN	31	OPC-Oligo	31 OPC-Oligo
12m_rep1	ATGATGGAGCTCAAAC-1	16	CA1-ProS Glut	016 CA1-ProS Glut	1	IT-ET Glut	01 IT-ET Glut
12m_rep1	ATGATGGAGCTTACTT-1	197	SNr Six3 Gaba	197 SNr Six3 Gaba	20	MB GABA	20 MB GABA
12m_rep1	ATGATGGAGGTTTGCG-1	318	Astro-NT NN	318 Astro-NT NN	30	Astro-Epen	30 Astro-Epen
12m_rep1	ATGATGGAGTCAGTAC-1	16	CA1-ProS Glut	016 CA1-ProS Glut	1	IT-ET Glut	01 IT-ET Glut
12m_rep1	ATGCAAACAGTGAACG-1	327	Oligo NN	327 Oligo NN	31	OPC-Oligo	31 OPC-Oligo
12m_rep1	ATGCAAACATAGGCGA-1	327	Oligo NN	327 Oligo NN	31	OPC-Oligo	31 OPC-Oligo
12m_rep1	ATGCAAACATCATGGC-1	197	SNr Six3 Gaba	197 SNr Six3 Gaba	20	MB GABA	20 MB GABA
12m_rep1	ATGCAAACATTAGGCC-1	327	Oligo NN	327 Oligo NN	31	OPC-Oligo	31 OPC-Oligo
12m_rep1	ATGCAGGCAAAGCCTC-1	16	CA1-ProS Glut	016 CA1-ProS Glut	1	IT-ET Glut	01 IT-ET Glut
12m_rep1	ATGCAGGCAACCCTCC-1	327	Oligo NN	327 Oligo NN	31	OPC-Oligo	31 OPC-Oligo
12m_rep1	ATGCAGGCAATCCCTT-1	327	Oligo NN	327 Oligo NN	31	OPC-Oligo	31 OPC-Oligo
12m_rep1	ATGCAGGCATGACTAT-1	327	Oligo NN	327 Oligo NN	31	OPC-Oligo	31 OPC-Oligo
12m_rep1	ATGCAGGCATGTCAAT-1	327	Oligo NN	327 Oligo NN	31	OPC-Oligo	31 OPC-Oligo
12m_rep1	ATGCATTCAATATACC-1	197	SNr Six3 Gaba	197 SNr Six3 Gaba	20	MB GABA	20 MB GABA
12m_rep1	ATGCATTCACCCACCT-1	197	SNr Six3 Gaba	197 SNr Six3 Gaba	20	MB GABA	20 MB GABA
12m_rep1	ATGCATTCATAACGGG-1	166	MRN Pou3f1 C1ql4 Glut	166 MRN Pou3f1 C1ql4 Glut	19	MB Glut	19 MB Glut
12m_rep1	ATGCCTGAGCTATATG-1	327	Oligo NN	327 Oligo NN	31	OPC-Oligo	31 OPC-Oligo
12m_rep1	ATGCCTGAGGATTGAG-1	101	ZI Pax6 Gaba	101 ZI Pax6 Gaba	12	HY GABA	12 HY GABA
12m_rep1	ATGCCTGAGGTGTTAC-1	197	SNr Six3 Gaba	197 SNr Six3 Gaba	20	MB GABA	20 MB GABA
12m_rep1	ATGCCTGAGTCACGAT-1	166	MRN Pou3f1 C1ql4 Glut	166 MRN Pou3f1 C1ql4 Glut	19	MB Glut	19 MB Glut
12m_rep1	ATGCGATTCACGTTAA-1	327	Oligo NN	327 Oligo NN	31	OPC-Oligo	31 OPC-Oligo
12m_rep1	ATGCGATTCATGCATA-1	327	Oligo NN	327 Oligo NN	31	OPC-Oligo	31 OPC-Oligo
12m_rep1	ATGCGATTCATTAGCA-1	16	CA1-ProS Glut	016 CA1-ProS Glut	1	IT-ET Glut	01 IT-ET Glut
12m_rep1	ATGCGATTCCACCTGT-1	197	SNr Six3 Gaba	197 SNr Six3 Gaba	20	MB GABA	20 MB GABA
12m_rep1	ATGCGATTCCCTTGCG-1	135	STN-PSTN Pitx2 Glut	135 STN-PSTN Pitx2 Glut	14	HY Glut	14 HY Glut
12m_rep1	ATGCGATTCGTTAGCG-1	327	Oligo NN	327 Oligo NN	31	OPC-Oligo	31 OPC-Oligo
12m_rep1	ATGCGATTCGTTTCGC-1	180	SCiw Pitx2 Glut	180 SCiw Pitx2 Glut	19	MB Glut	19 MB Glut
12m_rep1	ATGCGATTCTATTGTC-1	327	Oligo NN	327 Oligo NN	31	OPC-Oligo	31 OPC-Oligo
12m_rep1	ATGCGATTCTTTGAGA-1	197	SNr Six3 Gaba	197 SNr Six3 Gaba	20	MB GABA	20 MB GABA
12m_rep1	ATGCTTAAGCAAGATG-1	197	SNr Six3 Gaba	197 SNr Six3 Gaba	20	MB GABA	20 MB GABA
12m_rep1	ATGCTTAAGGTCCTGA-1	327	Oligo NN	327 Oligo NN	31	OPC-Oligo	31 OPC-Oligo
12m_rep1	ATGCTTAAGGTGTTAC-1	327	Oligo NN	327 Oligo NN	31	OPC-Oligo	31 OPC-Oligo
12m_rep1	ATGCTTAAGGTTACGT-1	93	RT-ZI Gnb3 Gaba	093 RT-ZI Gnb3 Gaba	12	HY GABA	12 HY GABA
12m_rep1	ATGCTTAAGGTTTGCG-1	327	Oligo NN	327 Oligo NN	31	OPC-Oligo	31 OPC-Oligo
12m_rep1	ATGCTTAAGTGCACGC-1	327	Oligo NN	327 Oligo NN	31	OPC-Oligo	31 OPC-Oligo
12m_rep1	ATGGACAAGATTCCTT-1	195	SNr-VTA Pax5 Npas1 Gaba	195 SNr-VTA Pax5 Npas1 Gaba	20	MB GABA	20 MB GABA
12m_rep1	ATGGACAAGCCGCTAA-1	327	Oligo NN	327 Oligo NN	31	OPC-Oligo	31 OPC-Oligo
12m_rep1	ATGGACAAGCTTAGTA-1	327	Oligo NN	327 Oligo NN	31	OPC-Oligo	31 OPC-Oligo
12m_rep1	ATGGACAAGGTTACGT-1	101	ZI Pax6 Gaba	101 ZI Pax6 Gaba	12	HY GABA	12 HY GABA
12m_rep1	ATGGACAAGTGAACCT-1	16	CA1-ProS Glut	016 CA1-ProS Glut	1	IT-ET Glut	01 IT-ET Glut
12m_rep1	ATGGCCCAGCATGAAG-1	327	Oligo NN	327 Oligo NN	31	OPC-Oligo	31 OPC-Oligo
12m_rep1	ATGGCCCAGCCGCTTT-1	16	CA1-ProS Glut	016 CA1-ProS Glut	1	IT-ET Glut	01 IT-ET Glut
12m_rep1	ATGGCCCAGCTAATCA-1	215	SNc-VTA-RAmb Foxa1 Dopa	215 SNc-VTA-RAmb Foxa1 Dopa	21	MB Dopa	21 MB Dopa
12m_rep1	ATGGCCCAGGCTATGT-1	197	SNr Six3 Gaba	197 SNr Six3 Gaba	20	MB GABA	20 MB GABA
12m_rep1	ATGGCCCAGTAACGGA-1	327	Oligo NN	327 Oligo NN	31	OPC-Oligo	31 OPC-Oligo
12m_rep1	ATGGCCGGTAATGACT-1	327	Oligo NN	327 Oligo NN	31	OPC-Oligo	31 OPC-Oligo
12m_rep1	ATGGCCGGTGATTTGG-1	16	CA1-ProS Glut	016 CA1-ProS Glut	1	IT-ET Glut	01 IT-ET Glut
12m_rep1	ATGGCCGGTTCACCCA-1	166	MRN Pou3f1 C1ql4 Glut	166 MRN Pou3f1 C1ql4 Glut	19	MB Glut	19 MB Glut
12m_rep1	ATGGCTGTCAATTGGC-1	213	SCsg Gabrr2 Gaba	213 SCsg Gabrr2 Gaba	20	MB GABA	20 MB GABA
12m_rep1	ATGGCTGTCACTCGCT-1	327	Oligo NN	327 Oligo NN	31	OPC-Oligo	31 OPC-Oligo
12m_rep1	ATGGCTGTCAGGGCCT-1	327	Oligo NN	327 Oligo NN	31	OPC-Oligo	31 OPC-Oligo
12m_rep1	ATGGCTGTCCCTGACT-1	166	MRN Pou3f1 C1ql4 Glut	166 MRN Pou3f1 C1ql4 Glut	19	MB Glut	19 MB Glut
12m_rep1	ATGGCTGTCCTAGTAA-1	327	Oligo NN	327 Oligo NN	31	OPC-Oligo	31 OPC-Oligo
12m_rep1	ATGGCTGTCCTCACTA-1	101	ZI Pax6 Gaba	101 ZI Pax6 Gaba	12	HY GABA	12 HY GABA
12m_rep1	ATGGCTGTCTTTGAGA-1	326	OPC NN	326 OPC NN	31	OPC-Oligo	31 OPC-Oligo
12m_rep1	ATGGCTTAGAACCTAC-1	327	Oligo NN	327 Oligo NN	31	OPC-Oligo	31 OPC-Oligo
12m_rep1	ATGGCTTAGCGGATTT-1	327	Oligo NN	327 Oligo NN	31	OPC-Oligo	31 OPC-Oligo
12m_rep1	ATGGCTTAGGCACAGG-1	327	Oligo NN	327 Oligo NN	31	OPC-Oligo	31 OPC-Oligo
12m_rep1	ATGGCTTAGTCGCTAG-1	327	Oligo NN	327 Oligo NN	31	OPC-Oligo	31 OPC-Oligo
12m_rep1	ATGGCTTAGTTTCCGC-1	327	Oligo NN	327 Oligo NN	31	OPC-Oligo	31 OPC-Oligo
12m_rep1	ATGGTCTAGAGGATAT-1	135	STN-PSTN Pitx2 Glut	135 STN-PSTN Pitx2 Glut	14	HY Glut	14 HY Glut
12m_rep1	ATGGTCTAGTGATTCA-1	327	Oligo NN	327 Oligo NN	31	OPC-Oligo	31 OPC-Oligo
12m_rep1	ATGGTGCGTCCTAATC-1	334	Microglia NN	334 Microglia NN	34	Immune	34 Immune
12m_rep1	ATGGTGCGTTAACGGC-1	197	SNr Six3 Gaba	197 SNr Six3 Gaba	20	MB GABA	20 MB GABA
12m_rep1	ATGGTTATCAAACCGT-1	135	STN-PSTN Pitx2 Glut	135 STN-PSTN Pitx2 Glut	14	HY Glut	14 HY Glut
12m_rep1	ATGGTTATCACACAGT-1	139	PH-LHA Foxb1 Glut	139 PH-LHA Foxb1 Glut	14	HY Glut	14 HY Glut
12m_rep1	ATGGTTATCTGCAAGT-1	138	PH Pitx2 Glut	138 PH Pitx2 Glut	14	HY Glut	14 HY Glut
12m_rep1	ATGGTTATCTTAGTGA-1	197	SNr Six3 Gaba	197 SNr Six3 Gaba	20	MB GABA	20 MB GABA
12m_rep1	ATGTAACGTCAGGCAT-1	327	Oligo NN	327 Oligo NN	31	OPC-Oligo	31 OPC-Oligo
12m_rep1	ATGTAACGTGTCCTGC-1	135	STN-PSTN Pitx2 Glut	135 STN-PSTN Pitx2 Glut	14	HY Glut	14 HY Glut
12m_rep1	ATGTAACGTTTATTCG-1	16	CA1-ProS Glut	016 CA1-ProS Glut	1	IT-ET Glut	01 IT-ET Glut
12m_rep1	ATGTAACGTTTGGCTT-1	101	ZI Pax6 Gaba	101 ZI Pax6 Gaba	12	HY GABA	12 HY GABA
12m_rep1	ATGTAAGCAACGTGCT-1	327	Oligo NN	327 Oligo NN	31	OPC-Oligo	31 OPC-Oligo
12m_rep1	ATGTAAGCAAGTTATC-1	16	CA1-ProS Glut	016 CA1-ProS Glut	1	IT-ET Glut	01 IT-ET Glut
12m_rep1	ATGTAAGCATGAATAG-1	197	SNr Six3 Gaba	197 SNr Six3 Gaba	20	MB GABA	20 MB GABA
12m_rep1	ATGTCAATCACGCCAA-1	327	Oligo NN	327 Oligo NN	31	OPC-Oligo	31 OPC-Oligo
12m_rep1	ATGTCAATCATGCTAA-1	327	Oligo NN	327 Oligo NN	31	OPC-Oligo	31 OPC-Oligo
12m_rep1	ATGTCAATCATTGCGG-1	197	SNr Six3 Gaba	197 SNr Six3 Gaba	20	MB GABA	20 MB GABA
12m_rep1	ATGTCAATCCTTCGTA-1	327	Oligo NN	327 Oligo NN	31	OPC-Oligo	31 OPC-Oligo
12m_rep1	ATGTCAATCGTTACTT-1	16	CA1-ProS Glut	016 CA1-ProS Glut	1	IT-ET Glut	01 IT-ET Glut
12m_rep1	ATGTCAATCTAAATCG-1	327	Oligo NN	327 Oligo NN	31	OPC-Oligo	31 OPC-Oligo
12m_rep1	ATGTCAATCTTAGTGA-1	327	Oligo NN	327 Oligo NN	31	OPC-Oligo	31 OPC-Oligo
12m_rep1	ATGTCATCACACTAAT-1	327	Oligo NN	327 Oligo NN	31	OPC-Oligo	31 OPC-Oligo
12m_rep1	ATGTCATCAGATAGAC-1	327	Oligo NN	327 Oligo NN	31	OPC-Oligo	31 OPC-Oligo
12m_rep1	ATGTCATCATAATCGT-1	327	Oligo NN	327 Oligo NN	31	OPC-Oligo	31 OPC-Oligo
12m_rep1	ATGTCCACAATCCCTT-1	327	Oligo NN	327 Oligo NN	31	OPC-Oligo	31 OPC-Oligo
12m_rep1	ATGTCCACACAAAGCG-1	327	Oligo NN	327 Oligo NN	31	OPC-Oligo	31 OPC-Oligo
12m_rep1	ATGTGAGAGAAAGGAA-1	197	SNr Six3 Gaba	197 SNr Six3 Gaba	20	MB GABA	20 MB GABA
12m_rep1	ATGTGAGAGCTTACTT-1	327	Oligo NN	327 Oligo NN	31	OPC-Oligo	31 OPC-Oligo
12m_rep1	ATGTGAGAGGCAGGTG-1	327	Oligo NN	327 Oligo NN	31	OPC-Oligo	31 OPC-Oligo
12m_rep1	ATGTTCAAGAGAGGCT-1	327	Oligo NN	327 Oligo NN	31	OPC-Oligo	31 OPC-Oligo
12m_rep1	ATGTTCAAGCATGTTA-1	101	ZI Pax6 Gaba	101 ZI Pax6 Gaba	12	HY GABA	12 HY GABA
12m_rep1	ATGTTCAAGGGTTAGA-1	16	CA1-ProS Glut	016 CA1-ProS Glut	1	IT-ET Glut	01 IT-ET Glut
12m_rep1	ATGTTCAAGGTGTCCA-1	327	Oligo NN	327 Oligo NN	31	OPC-Oligo	31 OPC-Oligo
12m_rep1	ATGTTGTCAACCTGGT-1	334	Microglia NN	334 Microglia NN	34	Immune	34 Immune
12m_rep1	ATGTTGTCACTAAGTT-1	139	PH-LHA Foxb1 Glut	139 PH-LHA Foxb1 Glut	14	HY Glut	14 HY Glut
12m_rep1	ATGTTGTCACTGACTA-1	318	Astro-NT NN	318 Astro-NT NN	30	Astro-Epen	30 Astro-Epen
12m_rep1	ATGTTGTCAGGTTAAA-1	327	Oligo NN	327 Oligo NN	31	OPC-Oligo	31 OPC-Oligo
12m_rep1	ATGTTGTCATGATTGT-1	166	MRN Pou3f1 C1ql4 Glut	166 MRN Pou3f1 C1ql4 Glut	19	MB Glut	19 MB Glut
12m_rep1	ATGTTGTCATGCATAT-1	318	Astro-NT NN	318 Astro-NT NN	30	Astro-Epen	30 Astro-Epen
12m_rep1	ATGTTTGAGAGCCGCT-1	327	Oligo NN	327 Oligo NN	31	OPC-Oligo	31 OPC-Oligo
12m_rep1	ATGTTTGAGCAAACCT-1	327	Oligo NN	327 Oligo NN	31	OPC-Oligo	31 OPC-Oligo
12m_rep1	ATGTTTGAGCTGTACG-1	166	MRN Pou3f1 C1ql4 Glut	166 MRN Pou3f1 C1ql4 Glut	19	MB Glut	19 MB Glut
12m_rep1	ATGTTTGAGGCTTAGT-1	135	STN-PSTN Pitx2 Glut	135 STN-PSTN Pitx2 Glut	14	HY Glut	14 HY Glut
12m_rep1	ATTAACCCAATAACGA-1	327	Oligo NN	327 Oligo NN	31	OPC-Oligo	31 OPC-Oligo
12m_rep1	ATTAACCCACATAGCC-1	101	ZI Pax6 Gaba	101 ZI Pax6 Gaba	12	HY GABA	12 HY GABA
12m_rep1	ATTAACCCACCCACAG-1	197	SNr Six3 Gaba	197 SNr Six3 Gaba	20	MB GABA	20 MB GABA
12m_rep1	ATTAACCCAGCCTAAC-1	101	ZI Pax6 Gaba	101 ZI Pax6 Gaba	12	HY GABA	12 HY GABA
12m_rep1	ATTAACCCATCGCTTT-1	327	Oligo NN	327 Oligo NN	31	OPC-Oligo	31 OPC-Oligo
12m_rep1	ATTAACCCATGTTGTG-1	156	MB-ant-ve Dmrta2 Glut	156 MB-ant-ve Dmrta2 Glut	19	MB Glut	19 MB Glut
12m_rep1	ATTACCCGTAACCTAG-1	135	STN-PSTN Pitx2 Glut	135 STN-PSTN Pitx2 Glut	14	HY Glut	14 HY Glut
12m_rep1	ATTACCCGTAACGTGC-1	135	STN-PSTN Pitx2 Glut	135 STN-PSTN Pitx2 Glut	14	HY Glut	14 HY Glut
12m_rep1	ATTACCCGTAAGCTTG-1	327	Oligo NN	327 Oligo NN	31	OPC-Oligo	31 OPC-Oligo
12m_rep1	ATTACCCGTATTGTCC-1	327	Oligo NN	327 Oligo NN	31	OPC-Oligo	31 OPC-Oligo
12m_rep1	ATTACCCGTTATTGCC-1	327	Oligo NN	327 Oligo NN	31	OPC-Oligo	31 OPC-Oligo
12m_rep1	ATTACCGCAAGACTCC-1	327	Oligo NN	327 Oligo NN	31	OPC-Oligo	31 OPC-Oligo
12m_rep1	ATTACCGCACCCACCT-1	135	STN-PSTN Pitx2 Glut	135 STN-PSTN Pitx2 Glut	14	HY Glut	14 HY Glut
12m_rep1	ATTACCGCAGGAACCA-1	16	CA1-ProS Glut	016 CA1-ProS Glut	1	IT-ET Glut	01 IT-ET Glut
12m_rep1	ATTACCGCATAGACCC-1	197	SNr Six3 Gaba	197 SNr Six3 Gaba	20	MB GABA	20 MB GABA
12m_rep1	ATTACCGCATCATGTG-1	215	SNc-VTA-RAmb Foxa1 Dopa	215 SNc-VTA-RAmb Foxa1 Dopa	21	MB Dopa	21 MB Dopa
12m_rep1	ATTACCGCATGCTTAG-1	327	Oligo NN	327 Oligo NN	31	OPC-Oligo	31 OPC-Oligo
12m_rep1	ATTACGTCAAGCCACT-1	327	Oligo NN	327 Oligo NN	31	OPC-Oligo	31 OPC-Oligo
12m_rep1	ATTACGTCACACTAAT-1	135	STN-PSTN Pitx2 Glut	135 STN-PSTN Pitx2 Glut	14	HY Glut	14 HY Glut
12m_rep1	ATTACGTCACTGGCCA-1	327	Oligo NN	327 Oligo NN	31	OPC-Oligo	31 OPC-Oligo
12m_rep1	ATTACGTCAGAGGCTA-1	197	SNr Six3 Gaba	197 SNr Six3 Gaba	20	MB GABA	20 MB GABA
12m_rep1	ATTACTGAGAGGGACT-1	16	CA1-ProS Glut	016 CA1-ProS Glut	1	IT-ET Glut	01 IT-ET Glut
12m_rep1	ATTACTGAGATAACCC-1	327	Oligo NN	327 Oligo NN	31	OPC-Oligo	31 OPC-Oligo
12m_rep1	ATTACTGAGCACAGGG-1	327	Oligo NN	327 Oligo NN	31	OPC-Oligo	31 OPC-Oligo
12m_rep1	ATTACTGAGCACTAAC-1	16	CA1-ProS Glut	016 CA1-ProS Glut	1	IT-ET Glut	01 IT-ET Glut
12m_rep1	ATTACTGAGCAGGTGG-1	166	MRN Pou3f1 C1ql4 Glut	166 MRN Pou3f1 C1ql4 Glut	19	MB Glut	19 MB Glut
12m_rep1	ATTACTGAGCTGCACA-1	166	MRN Pou3f1 C1ql4 Glut	166 MRN Pou3f1 C1ql4 Glut	19	MB Glut	19 MB Glut
12m_rep1	ATTACTGAGGAAGCTA-1	139	PH-LHA Foxb1 Glut	139 PH-LHA Foxb1 Glut	14	HY Glut	14 HY Glut
12m_rep1	ATTACTGAGGACCGCT-1	327	Oligo NN	327 Oligo NN	31	OPC-Oligo	31 OPC-Oligo
12m_rep1	ATTACTGAGGCTACTG-1	327	Oligo NN	327 Oligo NN	31	OPC-Oligo	31 OPC-Oligo
12m_rep1	ATTACTGAGGCTTAAC-1	197	SNr Six3 Gaba	197 SNr Six3 Gaba	20	MB GABA	20 MB GABA
12m_rep1	ATTACTGAGGGTCTAT-1	135	STN-PSTN Pitx2 Glut	135 STN-PSTN Pitx2 Glut	14	HY Glut	14 HY Glut
12m_rep1	ATTACTGAGTTTCCGC-1	327	Oligo NN	327 Oligo NN	31	OPC-Oligo	31 OPC-Oligo
12m_rep1	ATTAGCGGTAAGCTTG-1	327	Oligo NN	327 Oligo NN	31	OPC-Oligo	31 OPC-Oligo
12m_rep1	ATTAGCGGTAGTTGGC-1	139	PH-LHA Foxb1 Glut	139 PH-LHA Foxb1 Glut	14	HY Glut	14 HY Glut
12m_rep1	ATTAGCGGTTAGGCTA-1	135	STN-PSTN Pitx2 Glut	135 STN-PSTN Pitx2 Glut	14	HY Glut	14 HY Glut
12m_rep1	ATTAGCGGTTATTGCC-1	197	SNr Six3 Gaba	197 SNr Six3 Gaba	20	MB GABA	20 MB GABA
12m_rep1	ATTAGCGGTTTGGGCG-1	330	VLMC NN	330 VLMC NN	33	Vascular	33 Vascular
12m_rep1	ATTAGCTCACATAGCC-1	327	Oligo NN	327 Oligo NN	31	OPC-Oligo	31 OPC-Oligo
12m_rep1	ATTAGCTCACCGGTAT-1	327	Oligo NN	327 Oligo NN	31	OPC-Oligo	31 OPC-Oligo
12m_rep1	ATTAGCTCACTGACCG-1	327	Oligo NN	327 Oligo NN	31	OPC-Oligo	31 OPC-Oligo
12m_rep1	ATTAGCTCATTGCGAC-1	327	Oligo NN	327 Oligo NN	31	OPC-Oligo	31 OPC-Oligo
12m_rep1	ATTAGGTGTCAAAGGG-1	197	SNr Six3 Gaba	197 SNr Six3 Gaba	20	MB GABA	20 MB GABA
12m_rep1	ATTAGGTGTCATTGAG-1	326	OPC NN	326 OPC NN	31	OPC-Oligo	31 OPC-Oligo
12m_rep1	ATTAGGTGTCCTAACT-1	327	Oligo NN	327 Oligo NN	31	OPC-Oligo	31 OPC-Oligo
12m_rep1	ATTAGGTGTCCTTAGT-1	135	STN-PSTN Pitx2 Glut	135 STN-PSTN Pitx2 Glut	14	HY Glut	14 HY Glut
12m_rep1	ATTAGGTGTGGACATC-1	135	STN-PSTN Pitx2 Glut	135 STN-PSTN Pitx2 Glut	14	HY Glut	14 HY Glut
12m_rep1	ATTAGGTGTGTTAAAC-1	93	RT-ZI Gnb3 Gaba	093 RT-ZI Gnb3 Gaba	12	HY GABA	12 HY GABA
12m_rep1	ATTAGGTGTTAACGGC-1	166	MRN Pou3f1 C1ql4 Glut	166 MRN Pou3f1 C1ql4 Glut	19	MB Glut	19 MB Glut
12m_rep1	ATTAGGTGTTCCGGCT-1	334	Microglia NN	334 Microglia NN	34	Immune	34 Immune
12m_rep1	ATTAGGTGTTGCAATG-1	327	Oligo NN	327 Oligo NN	31	OPC-Oligo	31 OPC-Oligo
12m_rep1	ATTAGGTGTTGTAACG-1	327	Oligo NN	327 Oligo NN	31	OPC-Oligo	31 OPC-Oligo
12m_rep1	ATTAGTCCAACGTGCT-1	327	Oligo NN	327 Oligo NN	31	OPC-Oligo	31 OPC-Oligo
12m_rep1	ATTAGTCCACCTGGTG-1	327	Oligo NN	327 Oligo NN	31	OPC-Oligo	31 OPC-Oligo
12m_rep1	ATTAGTCCAGATTCAT-1	327	Oligo NN	327 Oligo NN	31	OPC-Oligo	31 OPC-Oligo
12m_rep1	ATTAGTCCAGCCAGAA-1	135	STN-PSTN Pitx2 Glut	135 STN-PSTN Pitx2 Glut	14	HY Glut	14 HY Glut
12m_rep1	ATTAGTCCAGCCGCTA-1	135	STN-PSTN Pitx2 Glut	135 STN-PSTN Pitx2 Glut	14	HY Glut	14 HY Glut
12m_rep1	ATTAGTCCAGGATAAC-1	138	PH Pitx2 Glut	138 PH Pitx2 Glut	14	HY Glut	14 HY Glut
12m_rep1	ATTAGTCCAGGCTGTT-1	327	Oligo NN	327 Oligo NN	31	OPC-Oligo	31 OPC-Oligo
12m_rep1	ATTAGTCCATGTCAAT-1	138	PH Pitx2 Glut	138 PH Pitx2 Glut	14	HY Glut	14 HY Glut
12m_rep1	ATTATCCTCAAGGACA-1	135	STN-PSTN Pitx2 Glut	135 STN-PSTN Pitx2 Glut	14	HY Glut	14 HY Glut
12m_rep1	ATTATCCTCACAGGAA-1	327	Oligo NN	327 Oligo NN	31	OPC-Oligo	31 OPC-Oligo
12m_rep1	ATTATCCTCATTAGTG-1	197	SNr Six3 Gaba	197 SNr Six3 Gaba	20	MB GABA	20 MB GABA
12m_rep1	ATTATGGTCGAGGTGG-1	139	PH-LHA Foxb1 Glut	139 PH-LHA Foxb1 Glut	14	HY Glut	14 HY Glut
12m_rep1	ATTATGGTCGTTTCGC-1	16	CA1-ProS Glut	016 CA1-ProS Glut	1	IT-ET Glut	01 IT-ET Glut
12m_rep1	ATTATGGTCTGTTCAT-1	334	Microglia NN	334 Microglia NN	34	Immune	34 Immune
12m_rep1	ATTATGGTCTTGCTAT-1	197	SNr Six3 Gaba	197 SNr Six3 Gaba	20	MB GABA	20 MB GABA
12m_rep1	ATTCAACCAAACCTTG-1	327	Oligo NN	327 Oligo NN	31	OPC-Oligo	31 OPC-Oligo
12m_rep1	ATTCAACCAAATATCC-1	327	Oligo NN	327 Oligo NN	31	OPC-Oligo	31 OPC-Oligo
12m_rep1	ATTCAACCATCAGCAC-1	327	Oligo NN	327 Oligo NN	31	OPC-Oligo	31 OPC-Oligo
12m_rep1	ATTCACTTCAATCTCT-1	197	SNr Six3 Gaba	197 SNr Six3 Gaba	20	MB GABA	20 MB GABA
12m_rep1	ATTCACTTCATGAAGG-1	156	MB-ant-ve Dmrta2 Glut	156 MB-ant-ve Dmrta2 Glut	19	MB Glut	19 MB Glut
12m_rep1	ATTCACTTCCTTAAGA-1	327	Oligo NN	327 Oligo NN	31	OPC-Oligo	31 OPC-Oligo
12m_rep1	ATTCACTTCGCTATAA-1	334	Microglia NN	334 Microglia NN	34	Immune	34 Immune
12m_rep1	ATTCACTTCGCTTGCT-1	197	SNr Six3 Gaba	197 SNr Six3 Gaba	20	MB GABA	20 MB GABA
12m_rep1	ATTCACTTCTAGCGAT-1	327	Oligo NN	327 Oligo NN	31	OPC-Oligo	31 OPC-Oligo
12m_rep1	ATTCACTTCTGCAAAC-1	334	Microglia NN	334 Microglia NN	34	Immune	34 Immune
12m_rep1	ATTCACTTCTTGCAGG-1	166	MRN Pou3f1 C1ql4 Glut	166 MRN Pou3f1 C1ql4 Glut	19	MB Glut	19 MB Glut
12m_rep1	ATTCATGAGCGAAGTA-1	197	SNr Six3 Gaba	197 SNr Six3 Gaba	20	MB GABA	20 MB GABA
12m_rep1	ATTCATGAGGTTTGAC-1	197	SNr Six3 Gaba	197 SNr Six3 Gaba	20	MB GABA	20 MB GABA
12m_rep1	ATTCATGAGTACTGGT-1	326	OPC NN	326 OPC NN	31	OPC-Oligo	31 OPC-Oligo
12m_rep1	ATTCCGGAGCAAGACA-1	319	Astro-TE NN	319 Astro-TE NN	30	Astro-Epen	30 Astro-Epen
12m_rep1	ATTCCGGAGGCTAAGA-1	334	Microglia NN	334 Microglia NN	34	Immune	34 Immune
12m_rep1	ATTCCGGAGGCTTAGT-1	159	IF-RL-CLI-PAG Foxa1 Glut	159 IF-RL-CLI-PAG Foxa1 Glut	19	MB Glut	19 MB Glut
12m_rep1	ATTCCGGAGGTCTTGG-1	327	Oligo NN	327 Oligo NN	31	OPC-Oligo	31 OPC-Oligo
12m_rep1	ATTCCTAGTAAGTCGC-1	197	SNr Six3 Gaba	197 SNr Six3 Gaba	20	MB GABA	20 MB GABA
12m_rep1	ATTCCTCCAACCCTAA-1	327	Oligo NN	327 Oligo NN	31	OPC-Oligo	31 OPC-Oligo
12m_rep1	ATTCCTCCACAGACTC-1	327	Oligo NN	327 Oligo NN	31	OPC-Oligo	31 OPC-Oligo
12m_rep1	ATTCCTCCAGGCCATT-1	327	Oligo NN	327 Oligo NN	31	OPC-Oligo	31 OPC-Oligo
12m_rep1	ATTCCTCCAGTAGGTG-1	135	STN-PSTN Pitx2 Glut	135 STN-PSTN Pitx2 Glut	14	HY Glut	14 HY Glut
12m_rep1	ATTCCTCCATAACGGG-1	327	Oligo NN	327 Oligo NN	31	OPC-Oligo	31 OPC-Oligo
12m_rep1	ATTCCTCCATAATCGT-1	318	Astro-NT NN	318 Astro-NT NN	30	Astro-Epen	30 Astro-Epen
12m_rep1	ATTCCTCCATATAACC-1	327	Oligo NN	327 Oligo NN	31	OPC-Oligo	31 OPC-Oligo
12m_rep1	ATTCGTTTCCTGTTCA-1	327	Oligo NN	327 Oligo NN	31	OPC-Oligo	31 OPC-Oligo
12m_rep1	ATTGAAGCAAGTGTCC-1	101	ZI Pax6 Gaba	101 ZI Pax6 Gaba	12	HY GABA	12 HY GABA
12m_rep1	ATTGAAGCACAGGAAT-1	197	SNr Six3 Gaba	197 SNr Six3 Gaba	20	MB GABA	20 MB GABA
12m_rep1	ATTGAAGCACGTGCTG-1	327	Oligo NN	327 Oligo NN	31	OPC-Oligo	31 OPC-Oligo
12m_rep1	ATTGACTCAAGGACCA-1	327	Oligo NN	327 Oligo NN	31	OPC-Oligo	31 OPC-Oligo
12m_rep1	ATTGACTCACCTAAGC-1	197	SNr Six3 Gaba	197 SNr Six3 Gaba	20	MB GABA	20 MB GABA
12m_rep1	ATTGACTCACTAAGCC-1	327	Oligo NN	327 Oligo NN	31	OPC-Oligo	31 OPC-Oligo
12m_rep1	ATTGACTCATAGTCAT-1	327	Oligo NN	327 Oligo NN	31	OPC-Oligo	31 OPC-Oligo
12m_rep1	ATTGACTCATCAGCAC-1	327	Oligo NN	327 Oligo NN	31	OPC-Oligo	31 OPC-Oligo
12m_rep1	ATTGCACAGCATGTTA-1	195	SNr-VTA Pax5 Npas1 Gaba	195 SNr-VTA Pax5 Npas1 Gaba	20	MB GABA	20 MB GABA
12m_rep1	ATTGCACAGCCTGACA-1	327	Oligo NN	327 Oligo NN	31	OPC-Oligo	31 OPC-Oligo
12m_rep1	ATTGCACAGGACACTT-1	93	RT-ZI Gnb3 Gaba	093 RT-ZI Gnb3 Gaba	12	HY GABA	12 HY GABA
12m_rep1	ATTGCACAGGACCAGG-1	215	SNc-VTA-RAmb Foxa1 Dopa	215 SNc-VTA-RAmb Foxa1 Dopa	21	MB Dopa	21 MB Dopa
12m_rep1	ATTGCACAGGTGAGAC-1	197	SNr Six3 Gaba	197 SNr Six3 Gaba	20	MB GABA	20 MB GABA
12m_rep1	ATTGCAGGTATTACCC-1	334	Microglia NN	334 Microglia NN	34	Immune	34 Immune
12m_rep1	ATTGCAGGTCACCTAT-1	327	Oligo NN	327 Oligo NN	31	OPC-Oligo	31 OPC-Oligo
12m_rep1	ATTGCAGGTTCCTCCT-1	327	Oligo NN	327 Oligo NN	31	OPC-Oligo	31 OPC-Oligo
12m_rep1	ATTGCAGGTTGCAGTA-1	327	Oligo NN	327 Oligo NN	31	OPC-Oligo	31 OPC-Oligo
12m_rep1	ATTGCGCCAAATACCT-1	327	Oligo NN	327 Oligo NN	31	OPC-Oligo	31 OPC-Oligo
12m_rep1	ATTGCGCCAATAACGA-1	327	Oligo NN	327 Oligo NN	31	OPC-Oligo	31 OPC-Oligo
12m_rep1	ATTGCGCCACCTCACC-1	327	Oligo NN	327 Oligo NN	31	OPC-Oligo	31 OPC-Oligo
12m_rep1	ATTGCGCCATCTTGAG-1	16	CA1-ProS Glut	016 CA1-ProS Glut	1	IT-ET Glut	01 IT-ET Glut
12m_rep1	ATTGCTCGTCAATACG-1	327	Oligo NN	327 Oligo NN	31	OPC-Oligo	31 OPC-Oligo
12m_rep1	ATTGCTCGTTTACCGT-1	327	Oligo NN	327 Oligo NN	31	OPC-Oligo	31 OPC-Oligo
12m_rep1	ATTGGCTAGCACCACA-1	327	Oligo NN	327 Oligo NN	31	OPC-Oligo	31 OPC-Oligo
12m_rep1	ATTGGCTAGCTTAGTA-1	327	Oligo NN	327 Oligo NN	31	OPC-Oligo	31 OPC-Oligo
12m_rep1	ATTGGCTAGTAACCAC-1	327	Oligo NN	327 Oligo NN	31	OPC-Oligo	31 OPC-Oligo
12m_rep1	ATTGGCTAGTCCTTCA-1	327	Oligo NN	327 Oligo NN	31	OPC-Oligo	31 OPC-Oligo
12m_rep1	ATTGGTTCACCGGCTA-1	318	Astro-NT NN	318 Astro-NT NN	30	Astro-Epen	30 Astro-Epen
12m_rep1	ATTGGTTCACCTGGTG-1	327	Oligo NN	327 Oligo NN	31	OPC-Oligo	31 OPC-Oligo
12m_rep1	ATTGGTTCACTTGTTC-1	135	STN-PSTN Pitx2 Glut	135 STN-PSTN Pitx2 Glut	14	HY Glut	14 HY Glut
12m_rep1	ATTGGTTCAGAAACGT-1	327	Oligo NN	327 Oligo NN	31	OPC-Oligo	31 OPC-Oligo
12m_rep1	ATTGGTTCAGGATAAC-1	197	SNr Six3 Gaba	197 SNr Six3 Gaba	20	MB GABA	20 MB GABA
12m_rep1	ATTGGTTCATTGCGGT-1	327	Oligo NN	327 Oligo NN	31	OPC-Oligo	31 OPC-Oligo
12m_rep1	ATTGTCCGTGTGAGGA-1	166	MRN Pou3f1 C1ql4 Glut	166 MRN Pou3f1 C1ql4 Glut	19	MB Glut	19 MB Glut
12m_rep1	ATTGTCCGTTACGCAA-1	166	MRN Pou3f1 C1ql4 Glut	166 MRN Pou3f1 C1ql4 Glut	19	MB Glut	19 MB Glut
12m_rep1	ATTGTGATCATAACCA-1	327	Oligo NN	327 Oligo NN	31	OPC-Oligo	31 OPC-Oligo
12m_rep1	ATTGTGATCATGCTAA-1	327	Oligo NN	327 Oligo NN	31	OPC-Oligo	31 OPC-Oligo
12m_rep1	ATTGTGATCGCTCACT-1	197	SNr Six3 Gaba	197 SNr Six3 Gaba	20	MB GABA	20 MB GABA
12m_rep1	ATTTAGCCACCCACCT-1	327	Oligo NN	327 Oligo NN	31	OPC-Oligo	31 OPC-Oligo
12m_rep1	ATTTAGCCAGGCTTCG-1	327	Oligo NN	327 Oligo NN	31	OPC-Oligo	31 OPC-Oligo
12m_rep1	ATTTAGCCATGTCAAT-1	197	SNr Six3 Gaba	197 SNr Six3 Gaba	20	MB GABA	20 MB GABA
12m_rep1	ATTTAGGTCATTACTC-1	327	Oligo NN	327 Oligo NN	31	OPC-Oligo	31 OPC-Oligo
12m_rep1	ATTTGCAAGAATCGCT-1	327	Oligo NN	327 Oligo NN	31	OPC-Oligo	31 OPC-Oligo
12m_rep1	ATTTGCAAGCACAGAA-1	327	Oligo NN	327 Oligo NN	31	OPC-Oligo	31 OPC-Oligo
12m_rep1	ATTTGCAAGTAGAGGC-1	138	PH Pitx2 Glut	138 PH Pitx2 Glut	14	HY Glut	14 HY Glut
12m_rep1	ATTTGCAAGTCAGTAC-1	327	Oligo NN	327 Oligo NN	31	OPC-Oligo	31 OPC-Oligo
12m_rep1	ATTTGCAAGTTCCTGC-1	327	Oligo NN	327 Oligo NN	31	OPC-Oligo	31 OPC-Oligo
12m_rep1	ATTTGCGCAAATACCT-1	327	Oligo NN	327 Oligo NN	31	OPC-Oligo	31 OPC-Oligo
12m_rep1	ATTTGCGCAACAGCCT-1	327	Oligo NN	327 Oligo NN	31	OPC-Oligo	31 OPC-Oligo
12m_rep1	ATTTGCGCAACCCTAA-1	327	Oligo NN	327 Oligo NN	31	OPC-Oligo	31 OPC-Oligo
12m_rep1	ATTTGCGCAGGAACCA-1	327	Oligo NN	327 Oligo NN	31	OPC-Oligo	31 OPC-Oligo
12m_rep1	ATTTGCGCATATTGAC-1	334	Microglia NN	334 Microglia NN	34	Immune	34 Immune
12m_rep1	ATTTGCGCATGACTAT-1	327	Oligo NN	327 Oligo NN	31	OPC-Oligo	31 OPC-Oligo
12m_rep1	ATTTGTGAGAAGGTGC-1	327	Oligo NN	327 Oligo NN	31	OPC-Oligo	31 OPC-Oligo
12m_rep1	ATTTGTGAGAGAGGAG-1	197	SNr Six3 Gaba	197 SNr Six3 Gaba	20	MB GABA	20 MB GABA
12m_rep1	ATTTGTGAGATGCCTG-1	327	Oligo NN	327 Oligo NN	31	OPC-Oligo	31 OPC-Oligo
12m_rep1	ATTTGTGAGCCGCAAC-1	16	CA1-ProS Glut	016 CA1-ProS Glut	1	IT-ET Glut	01 IT-ET Glut
12m_rep1	ATTTGTGAGGCGGGTA-1	135	STN-PSTN Pitx2 Glut	135 STN-PSTN Pitx2 Glut	14	HY Glut	14 HY Glut
12m_rep1	CAAACAACAAGCCAGA-1	327	Oligo NN	327 Oligo NN	31	OPC-Oligo	31 OPC-Oligo
12m_rep1	CAAACAACAATTAAGG-1	180	SCiw Pitx2 Glut	180 SCiw Pitx2 Glut	19	MB Glut	19 MB Glut
12m_rep1	CAAACAACACCCACAG-1	327	Oligo NN	327 Oligo NN	31	OPC-Oligo	31 OPC-Oligo
12m_rep1	CAAACAACACCGTTCC-1	327	Oligo NN	327 Oligo NN	31	OPC-Oligo	31 OPC-Oligo
12m_rep1	CAAACAACACCTAAGC-1	327	Oligo NN	327 Oligo NN	31	OPC-Oligo	31 OPC-Oligo
12m_rep1	CAAACAACACCTAATG-1	101	ZI Pax6 Gaba	101 ZI Pax6 Gaba	12	HY GABA	12 HY GABA
12m_rep1	CAAACAACAGGCATCT-1	327	Oligo NN	327 Oligo NN	31	OPC-Oligo	31 OPC-Oligo
12m_rep1	CAAACAACATAATGTC-1	327	Oligo NN	327 Oligo NN	31	OPC-Oligo	31 OPC-Oligo
12m_rep1	CAAACACTCCTGAATA-1	197	SNr Six3 Gaba	197 SNr Six3 Gaba	20	MB GABA	20 MB GABA
12m_rep1	CAAACACTCCTTGTTG-1	197	SNr Six3 Gaba	197 SNr Six3 Gaba	20	MB GABA	20 MB GABA
12m_rep1	CAAACATGTAAAGCAA-1	327	Oligo NN	327 Oligo NN	31	OPC-Oligo	31 OPC-Oligo
12m_rep1	CAAACATGTACAATGT-1	327	Oligo NN	327 Oligo NN	31	OPC-Oligo	31 OPC-Oligo
12m_rep1	CAAACATGTCATTGTC-1	135	STN-PSTN Pitx2 Glut	135 STN-PSTN Pitx2 Glut	14	HY Glut	14 HY Glut
12m_rep1	CAAACATGTGAGCACT-1	327	Oligo NN	327 Oligo NN	31	OPC-Oligo	31 OPC-Oligo
12m_rep1	CAAACATGTTCGGTAA-1	166	MRN Pou3f1 C1ql4 Glut	166 MRN Pou3f1 C1ql4 Glut	19	MB Glut	19 MB Glut
12m_rep1	CAAACATGTTGCACGG-1	327	Oligo NN	327 Oligo NN	31	OPC-Oligo	31 OPC-Oligo
12m_rep1	CAAACCGTCGAGGAAC-1	327	Oligo NN	327 Oligo NN	31	OPC-Oligo	31 OPC-Oligo
12m_rep1	CAAACCGTCGCTAAGT-1	327	Oligo NN	327 Oligo NN	31	OPC-Oligo	31 OPC-Oligo
12m_rep1	CAAACCGTCGTTCACC-1	327	Oligo NN	327 Oligo NN	31	OPC-Oligo	31 OPC-Oligo
12m_rep1	CAAACCGTCTAAATCG-1	197	SNr Six3 Gaba	197 SNr Six3 Gaba	20	MB GABA	20 MB GABA
12m_rep1	CAAACCGTCTGGCAAT-1	135	STN-PSTN Pitx2 Glut	135 STN-PSTN Pitx2 Glut	14	HY Glut	14 HY Glut
12m_rep1	CAAACGCGTAAGCTCA-1	327	Oligo NN	327 Oligo NN	31	OPC-Oligo	31 OPC-Oligo
12m_rep1	CAAACGCGTAATAGCT-1	101	ZI Pax6 Gaba	101 ZI Pax6 Gaba	12	HY GABA	12 HY GABA
12m_rep1	CAAACGCGTATTTGCC-1	327	Oligo NN	327 Oligo NN	31	OPC-Oligo	31 OPC-Oligo
12m_rep1	CAAACGCGTCACACCC-1	327	Oligo NN	327 Oligo NN	31	OPC-Oligo	31 OPC-Oligo
12m_rep1	CAAACGCGTGGAAACG-1	138	PH Pitx2 Glut	138 PH Pitx2 Glut	14	HY Glut	14 HY Glut
12m_rep1	CAAACGCGTTGGATAT-1	326	OPC NN	326 OPC NN	31	OPC-Oligo	31 OPC-Oligo
12m_rep1	CAAACTGGTGTGCAAC-1	16	CA1-ProS Glut	016 CA1-ProS Glut	1	IT-ET Glut	01 IT-ET Glut
12m_rep1	CAAACTGGTTTCAGGA-1	327	Oligo NN	327 Oligo NN	31	OPC-Oligo	31 OPC-Oligo
12m_rep1	CAAAGCGCAAACGCGA-1	166	MRN Pou3f1 C1ql4 Glut	166 MRN Pou3f1 C1ql4 Glut	19	MB Glut	19 MB Glut
12m_rep1	CAAAGCGCACCGGTAT-1	139	PH-LHA Foxb1 Glut	139 PH-LHA Foxb1 Glut	14	HY Glut	14 HY Glut
12m_rep1	CAAAGCGCACTTAACG-1	327	Oligo NN	327 Oligo NN	31	OPC-Oligo	31 OPC-Oligo
12m_rep1	CAAAGCGCAGGAAGCC-1	16	CA1-ProS Glut	016 CA1-ProS Glut	1	IT-ET Glut	01 IT-ET Glut
12m_rep1	CAAAGCGCATAAGGAC-1	135	STN-PSTN Pitx2 Glut	135 STN-PSTN Pitx2 Glut	14	HY Glut	14 HY Glut
12m_rep1	CAAAGCGCATAGACCC-1	327	Oligo NN	327 Oligo NN	31	OPC-Oligo	31 OPC-Oligo
12m_rep1	CAAAGGATCAAAGGCA-1	93	RT-ZI Gnb3 Gaba	093 RT-ZI Gnb3 Gaba	12	HY GABA	12 HY GABA
12m_rep1	CAAAGGATCAATGAGG-1	327	Oligo NN	327 Oligo NN	31	OPC-Oligo	31 OPC-Oligo
12m_rep1	CAAAGGATCCCGCAAA-1	327	Oligo NN	327 Oligo NN	31	OPC-Oligo	31 OPC-Oligo
12m_rep1	CAAAGGATCCGCATGA-1	327	Oligo NN	327 Oligo NN	31	OPC-Oligo	31 OPC-Oligo
12m_rep1	CAAAGGATCTACCTGC-1	327	Oligo NN	327 Oligo NN	31	OPC-Oligo	31 OPC-Oligo
12m_rep1	CAAAGTGAGGTTAGAG-1	195	SNr-VTA Pax5 Npas1 Gaba	195 SNr-VTA Pax5 Npas1 Gaba	20	MB GABA	20 MB GABA
12m_rep1	CAAAGTGAGTAAGTCC-1	139	PH-LHA Foxb1 Glut	139 PH-LHA Foxb1 Glut	14	HY Glut	14 HY Glut
12m_rep1	CAAATCATCGGGACCT-1	195	SNr-VTA Pax5 Npas1 Gaba	195 SNr-VTA Pax5 Npas1 Gaba	20	MB GABA	20 MB GABA
12m_rep1	CAACAATGTAGTTGGC-1	197	SNr Six3 Gaba	197 SNr Six3 Gaba	20	MB GABA	20 MB GABA
12m_rep1	CAACAATGTGGCTTCC-1	327	Oligo NN	327 Oligo NN	31	OPC-Oligo	31 OPC-Oligo
12m_rep1	CAACAATGTTGTAAAC-1	327	Oligo NN	327 Oligo NN	31	OPC-Oligo	31 OPC-Oligo
12m_rep1	CAACAATGTTTATCGC-1	16	CA1-ProS Glut	016 CA1-ProS Glut	1	IT-ET Glut	01 IT-ET Glut
12m_rep1	CAACAGGCAATCTCTC-1	327	Oligo NN	327 Oligo NN	31	OPC-Oligo	31 OPC-Oligo
12m_rep1	CAACAGGCACACAATT-1	215	SNc-VTA-RAmb Foxa1 Dopa	215 SNc-VTA-RAmb Foxa1 Dopa	21	MB Dopa	21 MB Dopa
12m_rep1	CAACAGGCACCTCAGG-1	327	Oligo NN	327 Oligo NN	31	OPC-Oligo	31 OPC-Oligo
12m_rep1	CAACAGGCAGCTAATT-1	318	Astro-NT NN	318 Astro-NT NN	30	Astro-Epen	30 Astro-Epen
12m_rep1	CAACAGGCATCACAGC-1	327	Oligo NN	327 Oligo NN	31	OPC-Oligo	31 OPC-Oligo
12m_rep1	CAACAGGCATGAAGTA-1	327	Oligo NN	327 Oligo NN	31	OPC-Oligo	31 OPC-Oligo
12m_rep1	CAACCCGCAATATAGG-1	139	PH-LHA Foxb1 Glut	139 PH-LHA Foxb1 Glut	14	HY Glut	14 HY Glut
12m_rep1	CAACCCGCACAATGCC-1	327	Oligo NN	327 Oligo NN	31	OPC-Oligo	31 OPC-Oligo
12m_rep1	CAACCCGCAGACAAAC-1	135	STN-PSTN Pitx2 Glut	135 STN-PSTN Pitx2 Glut	14	HY Glut	14 HY Glut
12m_rep1	CAACCCGCAGGCCTTG-1	197	SNr Six3 Gaba	197 SNr Six3 Gaba	20	MB GABA	20 MB GABA
12m_rep1	CAACCCTTCAATCTAG-1	327	Oligo NN	327 Oligo NN	31	OPC-Oligo	31 OPC-Oligo
12m_rep1	CAACCCTTCCTAGTTT-1	334	Microglia NN	334 Microglia NN	34	Immune	34 Immune
12m_rep1	CAACCCTTCTTCAATC-1	16	CA1-ProS Glut	016 CA1-ProS Glut	1	IT-ET Glut	01 IT-ET Glut
12m_rep1	CAACTAATCAATCTCT-1	16	CA1-ProS Glut	016 CA1-ProS Glut	1	IT-ET Glut	01 IT-ET Glut
12m_rep1	CAACTAATCGCTTCTA-1	327	Oligo NN	327 Oligo NN	31	OPC-Oligo	31 OPC-Oligo
12m_rep1	CAACTAGGTAATCACG-1	327	Oligo NN	327 Oligo NN	31	OPC-Oligo	31 OPC-Oligo
12m_rep1	CAACTAGGTATTGGAT-1	327	Oligo NN	327 Oligo NN	31	OPC-Oligo	31 OPC-Oligo
12m_rep1	CAACTAGGTGTCCAAA-1	327	Oligo NN	327 Oligo NN	31	OPC-Oligo	31 OPC-Oligo
12m_rep1	CAACTAGGTTGTTGTC-1	197	SNr Six3 Gaba	197 SNr Six3 Gaba	20	MB GABA	20 MB GABA
12m_rep1	CAACTAGGTTTCCGGC-1	327	Oligo NN	327 Oligo NN	31	OPC-Oligo	31 OPC-Oligo
12m_rep1	CAAGAACCATTAGGTT-1	327	Oligo NN	327 Oligo NN	31	OPC-Oligo	31 OPC-Oligo
12m_rep1	CAAGAACCATTATGGT-1	327	Oligo NN	327 Oligo NN	31	OPC-Oligo	31 OPC-Oligo
12m_rep1	CAAGAACCATTCCTCG-1	327	Oligo NN	327 Oligo NN	31	OPC-Oligo	31 OPC-Oligo
12m_rep1	CAAGACAAGATGCCTG-1	327	Oligo NN	327 Oligo NN	31	OPC-Oligo	31 OPC-Oligo
12m_rep1	CAAGACAAGCTAATCA-1	327	Oligo NN	327 Oligo NN	31	OPC-Oligo	31 OPC-Oligo
12m_rep1	CAAGACAAGGAGTCTT-1	197	SNr Six3 Gaba	197 SNr Six3 Gaba	20	MB GABA	20 MB GABA
12m_rep1	CAAGACAAGGCGGGTA-1	166	MRN Pou3f1 C1ql4 Glut	166 MRN Pou3f1 C1ql4 Glut	19	MB Glut	19 MB Glut
12m_rep1	CAAGACAAGGTTTGAC-1	318	Astro-NT NN	318 Astro-NT NN	30	Astro-Epen	30 Astro-Epen
12m_rep1	CAAGCTAGTAGTAAGA-1	327	Oligo NN	327 Oligo NN	31	OPC-Oligo	31 OPC-Oligo
12m_rep1	CAAGGCCTCAGCCAAT-1	327	Oligo NN	327 Oligo NN	31	OPC-Oligo	31 OPC-Oligo
12m_rep1	CAAGGCCTCATGGCTG-1	197	SNr Six3 Gaba	197 SNr Six3 Gaba	20	MB GABA	20 MB GABA
12m_rep1	CAAGGCCTCCCTCAAC-1	197	SNr Six3 Gaba	197 SNr Six3 Gaba	20	MB GABA	20 MB GABA
12m_rep1	CAAGGCCTCGCTAGTG-1	197	SNr Six3 Gaba	197 SNr Six3 Gaba	20	MB GABA	20 MB GABA
12m_rep1	CAAGGCTGTGCTCCGT-1	327	Oligo NN	327 Oligo NN	31	OPC-Oligo	31 OPC-Oligo
12m_rep1	CAAGGCTGTTATCCGT-1	139	PH-LHA Foxb1 Glut	139 PH-LHA Foxb1 Glut	14	HY Glut	14 HY Glut
[truncated: 38,127 more rows]
