# Supplementary material for: Single-nucleus multiomic profiling of the aging mouse substantia nigra reveals conserved gene alterations linked to Parkinson's disease
Source: HighWire-hosted journal article supplement (doi:10.1101/gr.281113.125), 2026-04
Supplement: Supplemental_Table_S2.xlsx [file Supplemental_Table_S2.xlsx]

## Sheet: Supplemental_Table_S2
Supplemental Table S2: Age-associated differentially expressed genes detected in each cell subclass using a linear model
subclass	gene	p-value	q-value	estimate
016 CA1-ProS Glut	Rpl7	1.26e-07	0.00181982	0.0386341
016 CA1-ProS Glut	Cox5b	1.24e-08	0.00017933	0.0348229
016 CA1-ProS Glut	Hspe1	3.77e-07	0.00543609	0.0478712
016 CA1-ProS Glut	Erbb4	2.26e-08	0.00032618	-0.101121
016 CA1-ProS Glut	Ncl	1.86e-06	0.0266924	0.046478
016 CA1-ProS Glut	Dpp10	7.24e-08	0.00104605	-0.0243526
016 CA1-ProS Glut	Gpr37l1	1.2e-07	0.00173823	-0.29677
016 CA1-ProS Glut	Atp1b1	2.39e-06	0.0343494	0.015942
016 CA1-ProS Glut	Mpc2	7.3e-09	0.00010561	0.0344954
016 CA1-ProS Glut	Mgst3	1.61e-07	0.00232712	0.0390764
016 CA1-ProS Glut	Pfdn2	1.08e-08	0.00015618	0.0616765
016 CA1-ProS Glut	F11r	9.42e-07	0.0135594	-0.144377
016 CA1-ProS Glut	Atp1a2	5.52e-07	0.00795218	-0.239051
016 CA1-ProS Glut	Fnbp1	9.36e-07	0.0134839	-0.0244113
016 CA1-ProS Glut	Rpl12	4.37e-10	6.33e-06	0.0510928
016 CA1-ProS Glut	Lypd6	1.2e-06	0.0172731	-0.353763
016 CA1-ProS Glut	Chst1	9.46e-07	0.0136137	-0.0874218
016 CA1-ProS Glut	Slc1a2	2.4e-08	0.0003466	-0.0544313
016 CA1-ProS Glut	Dynlrb1	1.62e-06	0.0233262	0.0383404
016 CA1-ProS Glut	Nnat	7.55e-08	0.00108993	-0.151376
016 CA1-ProS Glut	Stmn3	2.48e-17	3.6e-13	0.0370072
016 CA1-ProS Glut	Cldn11	1.96e-09	2.84e-05	-0.0845347
016 CA1-ProS Glut	Ndufb5	1.66e-11	2.4e-07	0.0476077
016 CA1-ProS Glut	Atp11b	2.33e-06	0.0334456	-0.0293549
016 CA1-ProS Glut	Schip1	4.14e-07	0.00597253	-0.0271527
016 CA1-ProS Glut	Rps3a1	1.72e-09	2.49e-05	0.0380712
016 CA1-ProS Glut	Psmb4	2.17e-08	0.00031438	0.047774
016 CA1-ProS Glut	Atp5pb	7.92e-12	1.15e-07	0.0379275
016 CA1-ProS Glut	Rpl34	2.01e-06	0.0289538	0.032515
016 CA1-ProS Glut	Aimp1	2.12e-06	0.0304796	0.0516562
016 CA1-ProS Glut	H2az1	1.81e-07	0.00261144	0.0368699
016 CA1-ProS Glut	Uqcrh	9.69e-12	1.41e-07	0.0437763
016 CA1-ProS Glut	Rps8	6.5e-07	0.00936155	0.0286766
016 CA1-ProS Glut	Ndufs5	1.42e-08	0.00020576	0.0354637
016 CA1-ProS Glut	Kazn	4.68e-07	0.00674803	-0.0740103
016 CA1-ProS Glut	Rpl9	3.43e-06	0.0493062	0.0312923
016 CA1-ProS Glut	Uchl1	5.21e-10	7.54e-06	0.0273317
016 CA1-ProS Glut	Pebp1	3.89e-10	5.63e-06	0.0403244
016 CA1-ProS Glut	Rpl6	5.31e-08	0.00076749	0.0314475
016 CA1-ProS Glut	Rpl21	4.1e-08	0.00059193	0.0325279
016 CA1-ProS Glut	Coxfa4	4.98e-11	7.21e-07	0.0341347
016 CA1-ProS Glut	Ndufa5	1.06e-06	0.0152485	0.0381218
016 CA1-ProS Glut	Gpr37	2.4e-06	0.0344539	-0.0764243
016 CA1-ProS Glut	Tafa1	1.7e-14	2.46e-10	-0.145281
016 CA1-ProS Glut	Chl1	1.07e-06	0.0154671	-0.0713889
016 CA1-ProS Glut	Cntn4	2.97e-08	0.00042885	0.0193098
016 CA1-ProS Glut	Atp6v1e1	1.2e-07	0.00173121	0.0350635
016 CA1-ProS Glut	Gpr162	6.75e-08	0.00097536	-0.0460543
016 CA1-ProS Glut	Gapdh	1.8e-12	2.61e-08	0.0333633
016 CA1-ProS Glut	Ldhb	3.5e-11	5.07e-07	0.0333235
016 CA1-ProS Glut	Tnnt1	2.84e-08	0.00041016	0.0354278
016 CA1-ProS Glut	Rpl28	9.2e-12	1.33e-07	0.0437185
016 CA1-ProS Glut	Rps5	4.63e-07	0.00667124	0.0393932
016 CA1-ProS Glut	Rpl18	1.4e-08	0.00020242	0.0400614
016 CA1-ProS Glut	Slc17a6	3.22e-07	0.00464596	0.0243546
016 CA1-ProS Glut	Luzp2	1.03e-07	0.00149	-0.1336
016 CA1-ProS Glut	Ndufc2	1.76e-10	2.55e-06	0.0434409
016 CA1-ProS Glut	Trim30a	1.25e-06	0.0179725	-0.281836
016 CA1-ProS Glut	Rps13	2.59e-08	0.00037392	0.0398122
016 CA1-ProS Glut	Ccp110	2.03e-06	0.0291209	-0.0556069
016 CA1-ProS Glut	Aldoa	4.01e-09	5.8e-05	0.0312825
016 CA1-ProS Glut	Cend1	4.46e-07	0.00642472	0.0346445
016 CA1-ProS Glut	Slc25a4	3.24e-06	0.0465421	0.0240206
016 CA1-ProS Glut	Ndufa13	2.77e-06	0.0398434	0.0282409
016 CA1-ProS Glut	Rab3a	1.55e-08	0.00022445	0.0319082
016 CA1-ProS Glut	Fa2h	1.04e-07	0.00149626	-0.0906329
016 CA1-ProS Glut	Gabarapl2	4.88e-07	0.00703803	0.0343468
016 CA1-ProS Glut	Cox4i1	2.31e-12	3.35e-08	0.0338263
016 CA1-ProS Glut	Rpl13	1.9e-17	2.75e-13	0.0479011
016 CA1-ProS Glut	Hspa8	1.4e-21	2.03e-17	0.0445802
016 CA1-ProS Glut	Cox5a	7.84e-17	1.14e-12	0.0427572
016 CA1-ProS Glut	Rpl4	1.1e-06	0.0157654	0.040263
016 CA1-ProS Glut	Cox7a2	1.94e-07	0.00279515	0.0345264
016 CA1-ProS Glut	Uqcrc1	9.29e-08	0.00134058	0.0387253
016 CA1-ProS Glut	Rpsa	7.17e-15	1.04e-10	0.0490644
016 CA1-ProS Glut	Rpl14	2e-10	2.9e-06	0.0428523
016 CA1-ProS Glut	Marcks	1.42e-06	0.0203641	-0.0984378
016 CA1-ProS Glut	Mif	8.39e-12	1.22e-07	0.0453637
016 CA1-ProS Glut	Chchd10	7.73e-17	1.12e-12	0.0478029
016 CA1-ProS Glut	Gpx4	2.38e-08	0.0003446	0.0386547
016 CA1-ProS Glut	Atp5f1d	2.77e-06	0.0398002	0.0291046
016 CA1-ProS Glut	Gm38560	1.57e-07	0.00226717	-0.111593
016 CA1-ProS Glut	Slc25a3	2.32e-11	3.37e-07	0.031124
016 CA1-ProS Glut	Atp5f1b	9.42e-07	0.0135633	0.0256924
016 CA1-ProS Glut	Selenom	6.86e-07	0.00987388	0.034636
016 CA1-ProS Glut	Ppia	4.07e-08	0.00058789	0.0254056
016 CA1-ProS Glut	Mdh1	1.15e-18	1.67e-14	0.0412483
016 CA1-ProS Glut	Rps27a	6.76e-07	0.00974369	0.0341697
016 CA1-ProS Glut	Hint1	2.93e-06	0.0421361	0.0312308
016 CA1-ProS Glut	Ubb	1.31e-12	1.91e-08	0.0316949
016 CA1-ProS Glut	Rpl26	4.24e-07	0.00610981	0.0343519
016 CA1-ProS Glut	Eif5a	1.07e-07	0.00153886	0.0459397
016 CA1-ProS Glut	Wsb1	2.83e-12	4.11e-08	-0.0563432
016 CA1-ProS Glut	Car10	3.93e-07	0.00565957	-0.0554905
016 CA1-ProS Glut	Atp5mc1	7.36e-08	0.00106265	0.030517
016 CA1-ProS Glut	Eif1	8.9e-08	0.00128555	0.0311945
016 CA1-ProS Glut	Coa3	1.34e-09	1.94e-05	0.056126
016 CA1-ProS Glut	Rpl27	5.09e-09	7.36e-05	0.0417787
016 CA1-ProS Glut	Ttyh2	4.81e-08	0.00069423	-0.100674
016 CA1-ProS Glut	Atp5pd	2.04e-08	0.00029484	0.0311033
016 CA1-ProS Glut	Calm1	9.97e-16	1.45e-11	0.0325282
016 CA1-ProS Glut	Meg3	2.56e-09	3.7e-05	-0.0100876
016 CA1-ProS Glut	Hsp90aa1	5.17e-12	7.5e-08	0.0314767
016 CA1-ProS Glut	Ckb	1.58e-11	2.29e-07	0.0315241
016 CA1-ProS Glut	Atp5mj	2.2e-06	0.0315757	0.0390183
016 CA1-ProS Glut	Rps23	2.02e-09	2.92e-05	0.0450488
016 CA1-ProS Glut	Mrps36	1.3e-06	0.0187431	0.0554185
016 CA1-ProS Glut	Rps24	4.22e-07	0.00608246	0.0362753
016 CA1-ProS Glut	Psmb5	8.16e-09	0.0001181	0.0450644
016 CA1-ProS Glut	Clu	1.01e-08	0.00014645	-0.119352
016 CA1-ProS Glut	Stmn4	5.5e-07	0.00792672	0.0286622
016 CA1-ProS Glut	Gm16867	2.36e-10	3.42e-06	0.651174
016 CA1-ProS Glut	Tpt1	8.64e-13	1.25e-08	0.0404826
016 CA1-ProS Glut	Cox6c	2.15e-06	0.0309765	0.0311142
016 CA1-ProS Glut	Zfpm2	1.05e-06	0.0150804	-0.148271
016 CA1-ProS Glut	Cyc1	9.29e-09	0.0001344	0.0435923
016 CA1-ProS Glut	Vps28	8.24e-07	0.0118646	0.0448357
016 CA1-ProS Glut	Rpl8	3.05e-08	0.00044101	0.0352322
016 CA1-ProS Glut	Pvalb	3.48e-13	5.04e-09	0.0710285
016 CA1-ProS Glut	Lgals1	2.56e-06	0.0368528	0.113892
016 CA1-ProS Glut	Atf4	1.21e-07	0.00174818	0.0608876
016 CA1-ProS Glut	Ndufa6	1.41e-06	0.0202201	0.0348712
016 CA1-ProS Glut	Sbf1	2.63e-08	0.00038043	-0.0556059
016 CA1-ProS Glut	Apod	2.61e-16	3.79e-12	0.10096
016 CA1-ProS Glut	Rpl24	7.03e-10	1.02e-05	0.0393156
016 CA1-ProS Glut	Robo2	7.31e-09	0.00010577	-0.112753
016 CA1-ProS Glut	Ncam2	9.48e-07	0.0136521	-0.0474021
016 CA1-ProS Glut	Atp5pf	5.54e-07	0.00798782	0.0283648
016 CA1-ProS Glut	Atp5po	1.43e-09	2.07e-05	0.0374242
016 CA1-ProS Glut	Pcp4	1.71e-30	2.49e-26	0.0459458
016 CA1-ProS Glut	Dynlt1a	6.72e-07	0.00968672	-0.154907
016 CA1-ProS Glut	Mpc1	2.22e-08	0.00032032	0.0305434
016 CA1-ProS Glut	Psmb1	1.93e-06	0.0278028	0.0331822
016 CA1-ProS Glut	Ndufb10	1.14e-10	1.66e-06	0.0467236
016 CA1-ProS Glut	Rps10	3.26e-11	4.73e-07	0.0434575
016 CA1-ProS Glut	AY036118	1.3e-09	1.88e-05	0.0276454
016 CA1-ProS Glut	Hsp90ab1	1.63e-09	2.36e-05	0.0302794
016 CA1-ProS Glut	Ptprs	5.37e-07	0.00773677	-0.024887
016 CA1-ProS Glut	Ndufa11	6.54e-10	9.47e-06	0.0414186
016 CA1-ProS Glut	Ndufv2	1.65e-07	0.00237996	0.0329066
016 CA1-ProS Glut	Calm2	2.35e-10	3.4e-06	0.0243269
016 CA1-ProS Glut	Aqp4	2.86e-07	0.00412645	-0.265738
016 CA1-ProS Glut	Ndfip1	1.19e-06	0.0171912	0.0192312
016 CA1-ProS Glut	Chsy3	8.81e-09	0.00012745	-0.0851688
016 CA1-ProS Glut	Rps14	1.25e-07	0.00180754	0.0329134
016 CA1-ProS Glut	Rpl17	6.17e-07	0.00888742	0.0293365
016 CA1-ProS Glut	Drap1	1.04e-07	0.00150538	0.0572571
016 CA1-ProS Glut	Malat1	4.38e-08	0.00063235	-0.0101922
016 CA1-ProS Glut	Prdx5	9.19e-13	1.33e-08	0.043576
016 CA1-ProS Glut	Fth1	1.12e-09	1.61e-05	0.0383855
016 CA1-ProS Glut	Opalin	3.1e-07	0.00447679	-0.0821563
016 CA1-ProS Glut	Got1	2e-06	0.0287713	0.0334235
016 CA1-ProS Glut	Ndufb8	1.71e-06	0.024604	0.0290026
093 RT-ZI Gnb3 Gaba	Ppan	4.45e-07	0.00461267	-0.412203
101 ZI Pax6 Gaba	Malat1	3.58e-07	0.00431163	-0.0159663
135 STN-PSTN Pitx2 Glut	Rpl7	1.38e-13	2.12e-09	0.0429875
135 STN-PSTN Pitx2 Glut	Cox5b	5.43e-12	8.34e-08	0.0329759
135 STN-PSTN Pitx2 Glut	Hspe1	4.78e-07	0.00726563	0.0353596
135 STN-PSTN Pitx2 Glut	Eef1b2	8.47e-15	1.3e-10	0.0472477
135 STN-PSTN Pitx2 Glut	Rpl37a	1.87e-07	0.00285228	0.0298126
135 STN-PSTN Pitx2 Glut	Tuba4a	1.91e-09	2.92e-05	0.0361844
135 STN-PSTN Pitx2 Glut	Resp18	8.07e-14	1.24e-09	0.0333074
135 STN-PSTN Pitx2 Glut	Scg2	7.18e-10	1.1e-05	0.0291946
135 STN-PSTN Pitx2 Glut	Tsn	1.97e-09	3.02e-05	0.0343485
135 STN-PSTN Pitx2 Glut	Mpc2	1.42e-09	2.17e-05	0.0299249
135 STN-PSTN Pitx2 Glut	Mgst3	6.03e-07	0.00916258	0.0304155
135 STN-PSTN Pitx2 Glut	Nenf	2.05e-06	0.0311373	0.0276255
135 STN-PSTN Pitx2 Glut	Tubb4b	2.3e-11	3.52e-07	0.0379334
135 STN-PSTN Pitx2 Glut	Ptgds	9.55e-22	1.48e-17	0.111143
135 STN-PSTN Pitx2 Glut	Edf1	5.05e-08	0.00077048	0.0339815
135 STN-PSTN Pitx2 Glut	Rpl7a	1.16e-08	0.00017699	0.0329139
135 STN-PSTN Pitx2 Glut	Swi5	1.09e-08	0.00016599	0.0404247
135 STN-PSTN Pitx2 Glut	Rpl12	5.48e-18	8.46e-14	0.0528709
135 STN-PSTN Pitx2 Glut	Arpc5l	5.27e-08	0.00080411	0.03979
135 STN-PSTN Pitx2 Glut	Atp5mc3	7.24e-11	1.11e-06	0.0352039
135 STN-PSTN Pitx2 Glut	Bdnf	1.32e-07	0.00200849	0.0785699
135 STN-PSTN Pitx2 Glut	Emc7	1.27e-07	0.00194349	0.0319782
135 STN-PSTN Pitx2 Glut	Srp14	1.7e-06	0.0257498	0.035868
135 STN-PSTN Pitx2 Glut	B2m	7.82e-13	1.2e-08	0.0747063
135 STN-PSTN Pitx2 Glut	Cst3	6.78e-10	1.04e-05	0.0288908
135 STN-PSTN Pitx2 Glut	Dynlrb1	2.4e-12	3.69e-08	0.0444065
135 STN-PSTN Pitx2 Glut	Snhg11	4.23e-24	6.54e-20	-0.0132732
135 STN-PSTN Pitx2 Glut	Atp5f1e	3.45e-12	5.3e-08	0.0476312
135 STN-PSTN Pitx2 Glut	Psma7	7.76e-07	0.0117868	0.0283545
135 STN-PSTN Pitx2 Glut	Rps21	1.04e-08	0.00015934	0.0318043
135 STN-PSTN Pitx2 Glut	Stmn3	5.87e-24	9.07e-20	0.0341663
135 STN-PSTN Pitx2 Glut	Stmn2	2.37e-07	0.00360914	0.019195
135 STN-PSTN Pitx2 Glut	Rpl22l1	3.76e-10	5.76e-06	0.035285
135 STN-PSTN Pitx2 Glut	Sec62	9.39e-08	0.0014316	0.0215835
135 STN-PSTN Pitx2 Glut	Ndufb5	4.58e-20	7.08e-16	0.0427902
135 STN-PSTN Pitx2 Glut	Atp11b	1.12e-08	0.00017069	-0.0210665
135 STN-PSTN Pitx2 Glut	Ndufc1	2.55e-08	0.00038945	0.0381417
135 STN-PSTN Pitx2 Glut	Rps3a1	7.96e-25	1.23e-20	0.0504472
135 STN-PSTN Pitx2 Glut	Psmb4	7.83e-09	0.00011971	0.0400505
135 STN-PSTN Pitx2 Glut	Atp5pb	5.2e-09	7.96e-05	0.0250364
135 STN-PSTN Pitx2 Glut	Gstm5	3.9e-07	0.00593339	0.0363514
135 STN-PSTN Pitx2 Glut	Gstm1	3.03e-08	0.00046299	0.0697999
135 STN-PSTN Pitx2 Glut	Sars1	2.08e-06	0.0316242	0.0301931
135 STN-PSTN Pitx2 Glut	Rpl34	7.89e-12	1.21e-07	0.0426976
135 STN-PSTN Pitx2 Glut	H2az1	1.42e-13	2.19e-09	0.040695
135 STN-PSTN Pitx2 Glut	Rps20	7.4e-07	0.0112441	0.0279682
135 STN-PSTN Pitx2 Glut	Ndufb6	5.88e-08	0.00089671	0.0392364
135 STN-PSTN Pitx2 Glut	Dnaja1	7.5e-08	0.00114377	0.0305099
135 STN-PSTN Pitx2 Glut	Gm17167	2.94e-11	4.51e-07	0.386405
135 STN-PSTN Pitx2 Glut	Clta	1.47e-09	2.25e-05	0.0357135
135 STN-PSTN Pitx2 Glut	Rps6	1.95e-19	3.01e-15	0.0499321
135 STN-PSTN Pitx2 Glut	Uqcrh	7.29e-23	1.13e-18	0.0502795
135 STN-PSTN Pitx2 Glut	Rps8	3.27e-21	5.06e-17	0.0421924
135 STN-PSTN Pitx2 Glut	Ndufs5	4.72e-17	7.27e-13	0.0412363
135 STN-PSTN Pitx2 Glut	Atp5if1	3.93e-10	6.02e-06	0.028814
135 STN-PSTN Pitx2 Glut	Tmem50a	2.03e-09	3.11e-05	0.0363153
135 STN-PSTN Pitx2 Glut	Rpl11	1.66e-14	2.56e-10	0.035849
135 STN-PSTN Pitx2 Glut	Park7	4.95e-09	7.57e-05	0.0394979
135 STN-PSTN Pitx2 Glut	Mrpl20	3.94e-07	0.0060015	0.0402646
135 STN-PSTN Pitx2 Glut	Aurkaip1	1.43e-07	0.00217607	0.0456048
135 STN-PSTN Pitx2 Glut	Tomm7	5e-07	0.00760033	0.0449886
135 STN-PSTN Pitx2 Glut	Nicol1	1.91e-06	0.0290405	0.0266096
135 STN-PSTN Pitx2 Glut	Rpl9	2.46e-30	3.81e-26	0.0545663
135 STN-PSTN Pitx2 Glut	Uchl1	3.66e-09	5.59e-05	0.0232364
135 STN-PSTN Pitx2 Glut	Ociad1	7.6e-08	0.0011595	0.0247088
135 STN-PSTN Pitx2 Glut	Rpl5	8.56e-11	1.31e-06	0.0339798
135 STN-PSTN Pitx2 Glut	Dynll1	5.83e-09	8.91e-05	0.0407478
135 STN-PSTN Pitx2 Glut	Rplp0	5.24e-12	8.05e-08	0.0500379
135 STN-PSTN Pitx2 Glut	Pebp1	3.65e-10	5.6e-06	0.0331295
135 STN-PSTN Pitx2 Glut	Rpl6	2.62e-17	4.04e-13	0.0350996
135 STN-PSTN Pitx2 Glut	Arpc3	3.9e-07	0.00592832	0.0408388
135 STN-PSTN Pitx2 Glut	Ubc	9.07e-14	1.4e-09	0.0360179
135 STN-PSTN Pitx2 Glut	Ran	8.47e-08	0.00129197	0.0365203
135 STN-PSTN Pitx2 Glut	Chchd2	2.61e-20	4.03e-16	0.0451345
135 STN-PSTN Pitx2 Glut	Mdh2	6.49e-10	9.94e-06	0.0307901
135 STN-PSTN Pitx2 Glut	Znhit1	7.27e-07	0.0110448	0.0436709
135 STN-PSTN Pitx2 Glut	Cops6	1.51e-10	2.31e-06	0.0544709
135 STN-PSTN Pitx2 Glut	Rpl21	1.72e-17	2.65e-13	0.0381175
135 STN-PSTN Pitx2 Glut	Pomp	8.33e-09	0.00012729	0.0420023
135 STN-PSTN Pitx2 Glut	Asns	9.58e-07	0.014549	0.0443731
135 STN-PSTN Pitx2 Glut	Coxfa4	1.39e-27	2.15e-23	0.0448285
135 STN-PSTN Pitx2 Glut	Ndufa5	1.45e-07	0.00221353	0.0333399
135 STN-PSTN Pitx2 Glut	Cycs	5.29e-10	8.11e-06	0.0426596
135 STN-PSTN Pitx2 Glut	Nap1l5	4.39e-10	6.73e-06	0.0220591
135 STN-PSTN Pitx2 Glut	Tmsb10	7.43e-08	0.00113285	0.0289958
135 STN-PSTN Pitx2 Glut	Cct7	6.59e-09	0.00010072	0.0397885
135 STN-PSTN Pitx2 Glut	Rpl32	4.18e-18	6.45e-14	0.0440918
135 STN-PSTN Pitx2 Glut	Grcc10	1.93e-06	0.0293451	0.0301854
135 STN-PSTN Pitx2 Glut	Tpi1	2.63e-09	4.02e-05	0.0282525
135 STN-PSTN Pitx2 Glut	Gapdh	5.58e-18	8.61e-14	0.0343175
135 STN-PSTN Pitx2 Glut	Ndufa9	8.54e-08	0.00130245	0.0415179
135 STN-PSTN Pitx2 Glut	Ldhb	2.97e-07	0.0045206	0.0228179
135 STN-PSTN Pitx2 Glut	Rps9	2.21e-19	3.41e-15	0.0500164
135 STN-PSTN Pitx2 Glut	Leng9	6.47e-11	9.92e-07	-0.0646739
135 STN-PSTN Pitx2 Glut	Rpl28	8.16e-11	1.25e-06	0.0313019
135 STN-PSTN Pitx2 Glut	Rps5	8.76e-17	1.35e-12	0.0428872
135 STN-PSTN Pitx2 Glut	Selenow	1.07e-07	0.00163826	0.031996
135 STN-PSTN Pitx2 Glut	Calm3	1.87e-08	0.00028533	0.0342836
135 STN-PSTN Pitx2 Glut	Pnma8b	1.55e-06	0.0235254	0.0343593
135 STN-PSTN Pitx2 Glut	Apoe	6.29e-07	0.00957015	0.0493511
135 STN-PSTN Pitx2 Glut	Rps19	3.58e-17	5.53e-13	0.0495925
135 STN-PSTN Pitx2 Glut	Rabac1	2.82e-13	4.34e-09	0.0289247
135 STN-PSTN Pitx2 Glut	Pafah1b3	4.29e-09	6.56e-05	0.0838817
135 STN-PSTN Pitx2 Glut	Rps16	7.65e-18	1.18e-13	0.0427298
135 STN-PSTN Pitx2 Glut	Eif3k	1.23e-11	1.88e-07	0.0473049
135 STN-PSTN Pitx2 Glut	Tbcb	2.83e-06	0.0429431	0.0330426
135 STN-PSTN Pitx2 Glut	Cox6b1	7.85e-07	0.0119345	0.023031
135 STN-PSTN Pitx2 Glut	Rps11	8.52e-16	1.31e-11	0.040431
135 STN-PSTN Pitx2 Glut	Rpl13a	5.08e-19	7.84e-15	0.0464932
135 STN-PSTN Pitx2 Glut	Rpl18	2.41e-16	3.71e-12	0.0454269
135 STN-PSTN Pitx2 Glut	Ube3a	4.64e-14	7.15e-10	-0.0191518
135 STN-PSTN Pitx2 Glut	Tm2d3	4.49e-08	0.00068471	0.0307662
135 STN-PSTN Pitx2 Glut	Rps17	1.2e-07	0.00182801	0.031223
135 STN-PSTN Pitx2 Glut	Ndufc2	1.57e-19	2.42e-15	0.0442686
135 STN-PSTN Pitx2 Glut	Rps3	2.49e-19	3.84e-15	0.0467379
135 STN-PSTN Pitx2 Glut	Eif3f	6.24e-07	0.00948908	0.040186
135 STN-PSTN Pitx2 Glut	Rpl27a	7.62e-10	1.17e-05	0.0281214
135 STN-PSTN Pitx2 Glut	Rps13	5.7e-09	8.72e-05	0.0298439
135 STN-PSTN Pitx2 Glut	Rps15a	4.46e-10	6.83e-06	0.0375953
135 STN-PSTN Pitx2 Glut	Arl6ip1	4.26e-08	0.00065063	0.0255696
135 STN-PSTN Pitx2 Glut	Ndufab1	1.36e-08	0.00020778	0.03231
135 STN-PSTN Pitx2 Glut	Zkscan2	1.97e-06	0.0298661	-0.0357124
135 STN-PSTN Pitx2 Glut	Aldoa	2e-14	3.08e-10	0.0329961
135 STN-PSTN Pitx2 Glut	Vkorc1	2.96e-08	0.00045145	0.0703823
135 STN-PSTN Pitx2 Glut	Caly	2.59e-07	0.00394901	0.025369
135 STN-PSTN Pitx2 Glut	Hras	3.16e-08	0.00048255	0.0404582
135 STN-PSTN Pitx2 Glut	Rplp2	1.22e-09	1.87e-05	0.0332723
135 STN-PSTN Pitx2 Glut	Smim18	9.75e-07	0.0148127	0.0483177
135 STN-PSTN Pitx2 Glut	Slc25a4	1.28e-13	1.97e-09	0.0321203
135 STN-PSTN Pitx2 Glut	Yjefn3	7.46e-09	0.00011409	0.104991
135 STN-PSTN Pitx2 Glut	Ndufa13	1.1e-19	1.7e-15	0.0459589
135 STN-PSTN Pitx2 Glut	Tmem59l	2.55e-07	0.00388275	0.0232887
135 STN-PSTN Pitx2 Glut	Rab3a	1.58e-12	2.42e-08	0.0338085
135 STN-PSTN Pitx2 Glut	Rpl18a	1.98e-09	3.03e-05	0.0315889
135 STN-PSTN Pitx2 Glut	Use1	6.31e-07	0.00959081	0.0482337
135 STN-PSTN Pitx2 Glut	Ndufb7	9.81e-09	0.00014992	0.0377484
135 STN-PSTN Pitx2 Glut	Tecr	3.51e-07	0.00534487	0.0161191
135 STN-PSTN Pitx2 Glut	Gabarapl2	1.75e-16	2.7e-12	0.0503256
135 STN-PSTN Pitx2 Glut	Cox4i1	1.61e-19	2.49e-15	0.0332496
135 STN-PSTN Pitx2 Glut	Rpl13	8.47e-22	1.31e-17	0.0405286
135 STN-PSTN Pitx2 Glut	Coa6	2.87e-07	0.00437544	0.070528
135 STN-PSTN Pitx2 Glut	Tomm20	4.58e-07	0.00696795	0.0289587
135 STN-PSTN Pitx2 Glut	Hspa8	6.12e-23	9.46e-19	0.0399026
135 STN-PSTN Pitx2 Glut	Rps25	1.03e-12	1.59e-08	0.039132
135 STN-PSTN Pitx2 Glut	Atp5mg	4.43e-10	6.79e-06	0.0308192
135 STN-PSTN Pitx2 Glut	Timm8b	1.48e-08	0.00022636	0.0416006
135 STN-PSTN Pitx2 Glut	Cox5a	1.31e-10	2e-06	0.0281884
135 STN-PSTN Pitx2 Glut	Rplp1	4.65e-27	7.2e-23	0.045809
135 STN-PSTN Pitx2 Glut	Rpl4	7.82e-09	0.00011959	0.0357157
135 STN-PSTN Pitx2 Glut	Eef1a1	6.12e-18	9.43e-14	0.0360865
135 STN-PSTN Pitx2 Glut	Cox7a2	1.03e-12	1.59e-08	0.0349802
135 STN-PSTN Pitx2 Glut	Rpsa	1.35e-22	2.08e-18	0.0457016
135 STN-PSTN Pitx2 Glut	Rpl14	1.68e-21	2.6e-17	0.0499576
135 STN-PSTN Pitx2 Glut	Rps12	1.73e-13	2.65e-09	0.0419848
135 STN-PSTN Pitx2 Glut	Cisd1	1.82e-10	2.79e-06	0.0374104
135 STN-PSTN Pitx2 Glut	Zwint	5.2e-20	8.03e-16	0.0317342
135 STN-PSTN Pitx2 Glut	Mif	7.45e-21	1.15e-16	0.0469699
135 STN-PSTN Pitx2 Glut	Chchd10	1.66e-16	2.56e-12	0.0369918
135 STN-PSTN Pitx2 Glut	Cstb	4.06e-07	0.00617171	0.0510211
135 STN-PSTN Pitx2 Glut	Bsg	3.52e-11	5.4e-07	0.0257795
135 STN-PSTN Pitx2 Glut	Gpx4	2.73e-09	4.18e-05	0.029748
135 STN-PSTN Pitx2 Glut	Atp5f1d	2.01e-06	0.0305072	0.0261702
135 STN-PSTN Pitx2 Glut	Ndufs7	3.07e-15	4.73e-11	0.0452324
135 STN-PSTN Pitx2 Glut	Rps15	1.87e-14	2.89e-10	0.0337074
135 STN-PSTN Pitx2 Glut	Oaz1	3.98e-07	0.00605139	0.0245777
135 STN-PSTN Pitx2 Glut	Hsp90b1	6.43e-07	0.00976753	0.0265601
135 STN-PSTN Pitx2 Glut	Ndufa12	3.86e-11	5.92e-07	0.0370788
135 STN-PSTN Pitx2 Glut	Mrpl42	3.14e-06	0.0475655	0.033766
135 STN-PSTN Pitx2 Glut	Naca	1.88e-08	0.00028676	0.0311808
135 STN-PSTN Pitx2 Glut	Atp5f1b	3.77e-07	0.00574505	0.019917
135 STN-PSTN Pitx2 Glut	Rps26	1.01e-09	1.55e-05	0.0342805
135 STN-PSTN Pitx2 Glut	Selenom	1.46e-20	2.25e-16	0.0475849
135 STN-PSTN Pitx2 Glut	Uqcr10	1.36e-06	0.020592	0.0288429
135 STN-PSTN Pitx2 Glut	Ppia	1.11e-15	1.71e-11	0.0331894
135 STN-PSTN Pitx2 Glut	Mdh1	4.08e-27	6.31e-23	0.0424678
135 STN-PSTN Pitx2 Glut	Rps27a	1.76e-25	2.72e-21	0.0537981
135 STN-PSTN Pitx2 Glut	Npm1	2.13e-11	3.27e-07	0.0485423
135 STN-PSTN Pitx2 Glut	Rack1	1.41e-07	0.0021427	0.0353323
135 STN-PSTN Pitx2 Glut	Skp1	1.74e-06	0.0264919	0.0326538
135 STN-PSTN Pitx2 Glut	Hint1	1.52e-14	2.34e-10	0.0391424
135 STN-PSTN Pitx2 Glut	Ubb	3.36e-29	5.2e-25	0.0428113
135 STN-PSTN Pitx2 Glut	Rpl26	1.2e-22	1.86e-18	0.0490341
135 STN-PSTN Pitx2 Glut	Gabarap	1.48e-08	0.00022614	0.0409555
135 STN-PSTN Pitx2 Glut	Rnasek	6.39e-11	9.81e-07	0.0277501
135 STN-PSTN Pitx2 Glut	Psmb6	1.28e-08	0.00019629	0.0389327
135 STN-PSTN Pitx2 Glut	Git1	3.73e-07	0.00568245	0.0747888
135 STN-PSTN Pitx2 Glut	Rpl23a	1.12e-09	1.72e-05	0.0291669
135 STN-PSTN Pitx2 Glut	Wsb1	1.73e-11	2.65e-07	-0.0297054
135 STN-PSTN Pitx2 Glut	Dynll2	9.89e-12	1.52e-07	0.0391482
135 STN-PSTN Pitx2 Glut	Nme2	2.16e-11	3.31e-07	0.0443261
135 STN-PSTN Pitx2 Glut	Nme1	6.1e-19	9.41e-15	0.0530041
135 STN-PSTN Pitx2 Glut	Atp5mc1	2.5e-06	0.0379596	0.0218051
135 STN-PSTN Pitx2 Glut	Psmb3	2.46e-07	0.00374867	0.0362254
135 STN-PSTN Pitx2 Glut	Rpl23	2.73e-17	4.21e-13	0.0457706
135 STN-PSTN Pitx2 Glut	Rpl19	1.42e-24	2.2e-20	0.0445591
135 STN-PSTN Pitx2 Glut	Eif1	2.79e-11	4.29e-07	0.0306634
135 STN-PSTN Pitx2 Glut	Coa3	1.54e-07	0.00234531	0.0396679
135 STN-PSTN Pitx2 Glut	Rpl27	4.48e-13	6.9e-09	0.0405937
135 STN-PSTN Pitx2 Glut	Psmc5	3.01e-10	4.61e-06	0.0458887
135 STN-PSTN Pitx2 Glut	Ddx5	2.23e-08	0.0003399	-0.0200809
135 STN-PSTN Pitx2 Glut	Atp5pd	1.19e-24	1.84e-20	0.0464972
135 STN-PSTN Pitx2 Glut	Vsnl1	2.28e-08	0.00034746	0.0187112
135 STN-PSTN Pitx2 Glut	Rps7	1e-17	1.54e-13	0.0444027
135 STN-PSTN Pitx2 Glut	Fkbp3	6.46e-12	9.92e-08	0.0346793
135 STN-PSTN Pitx2 Glut	Rps29	9.07e-13	1.39e-08	0.0391584
135 STN-PSTN Pitx2 Glut	Rtn1	1.76e-18	2.71e-14	0.025042
135 STN-PSTN Pitx2 Glut	Calm1	1.54e-17	2.37e-13	0.0315268
135 STN-PSTN Pitx2 Glut	Ifi27	2.39e-06	0.0362497	0.054763
135 STN-PSTN Pitx2 Glut	Meg3	4.96e-10	7.6e-06	-0.0081773
135 STN-PSTN Pitx2 Glut	Hsp90aa1	9.75e-22	1.51e-17	0.0368908
135 STN-PSTN Pitx2 Glut	Ckb	4.57e-07	0.00695004	0.0202134
135 STN-PSTN Pitx2 Glut	Acot13	4.77e-07	0.00726037	0.0423056
135 STN-PSTN Pitx2 Glut	Uqcrfs1	1.97e-06	0.0299588	0.0331063
135 STN-PSTN Pitx2 Glut	Tubb2a	4.92e-08	0.00075101	0.0265317
135 STN-PSTN Pitx2 Glut	Sncb	3.6e-10	5.52e-06	0.0299738
135 STN-PSTN Pitx2 Glut	Txndc15	2.48e-06	0.0376782	0.0272381
135 STN-PSTN Pitx2 Glut	Cox7c	1.2e-14	1.85e-10	0.0330838
135 STN-PSTN Pitx2 Glut	Rps23	8.7e-16	1.34e-11	0.0450254
135 STN-PSTN Pitx2 Glut	Btf3	1.68e-09	2.57e-05	0.0406522
135 STN-PSTN Pitx2 Glut	Mrps36	2.67e-06	0.0404487	0.0464876
135 STN-PSTN Pitx2 Glut	Rpl15	8.9e-14	1.37e-09	0.0404963
135 STN-PSTN Pitx2 Glut	Vdac2	1.71e-06	0.0260279	0.0303459
135 STN-PSTN Pitx2 Glut	Rps24	2.24e-27	3.46e-23	0.0540505
135 STN-PSTN Pitx2 Glut	Selenok	4.93e-11	7.56e-07	0.0356668
135 STN-PSTN Pitx2 Glut	Tkt	2.39e-06	0.0362597	0.0328809
135 STN-PSTN Pitx2 Glut	Spcs1	5.43e-15	8.36e-11	0.0411948
135 STN-PSTN Pitx2 Glut	Psmb5	2.4e-10	3.68e-06	0.0462529
135 STN-PSTN Pitx2 Glut	Psme1	1.28e-06	0.019425	0.0610595
135 STN-PSTN Pitx2 Glut	Nedd8	3.56e-07	0.00542665	0.0314712
135 STN-PSTN Pitx2 Glut	Stmn4	6.68e-07	0.0101586	0.0322312
135 STN-PSTN Pitx2 Glut	Itm2b	1.55e-06	0.0236019	0.016257
135 STN-PSTN Pitx2 Glut	Tpt1	3.97e-17	6.12e-13	0.0420586
135 STN-PSTN Pitx2 Glut	Serp2	5.31e-07	0.00807968	0.0297383
135 STN-PSTN Pitx2 Glut	Gm10076	4.1e-08	0.00062647	0.0820598
135 STN-PSTN Pitx2 Glut	Rpl37	2.18e-15	3.36e-11	0.0418811
135 STN-PSTN Pitx2 Glut	Cct5	5.76e-07	0.00875627	0.0379643
135 STN-PSTN Pitx2 Glut	Rpl30	7.09e-12	1.09e-07	0.0363121
135 STN-PSTN Pitx2 Glut	Cox6c	3.2e-13	4.93e-09	0.033507
135 STN-PSTN Pitx2 Glut	Atp6v1c1	8.86e-07	0.013468	0.0326277
135 STN-PSTN Pitx2 Glut	Ndufb9	4.63e-08	0.00070667	0.0280671
135 STN-PSTN Pitx2 Glut	Ly6e	4.8e-08	0.00073281	0.0450303
135 STN-PSTN Pitx2 Glut	Ly6h	8.37e-07	0.0127121	0.0201673
135 STN-PSTN Pitx2 Glut	Cyc1	7.18e-08	0.00109475	0.0290528
135 STN-PSTN Pitx2 Glut	Vps28	3.7e-11	5.69e-07	0.0469576
135 STN-PSTN Pitx2 Glut	Rpl8	7.92e-17	1.22e-12	0.0407485
135 STN-PSTN Pitx2 Glut	Ddx17	2.55e-06	0.0387491	-0.01968
135 STN-PSTN Pitx2 Glut	Rpl3	8.96e-16	1.38e-11	0.0410038
135 STN-PSTN Pitx2 Glut	Desi1	6.7e-07	0.0101897	-0.0353565
135 STN-PSTN Pitx2 Glut	Ndufa6	3.88e-11	5.95e-07	0.0345596
135 STN-PSTN Pitx2 Glut	Sbf1	4.71e-08	0.0007193	-0.037626
135 STN-PSTN Pitx2 Glut	Sco2	2.11e-07	0.00320975	0.0495749
135 STN-PSTN Pitx2 Glut	Tuba1b	1.15e-11	1.77e-07	0.0321449
135 STN-PSTN Pitx2 Glut	Pfdn5	1.26e-12	1.93e-08	0.045638
135 STN-PSTN Pitx2 Glut	Pam16	3.15e-09	4.82e-05	0.0471567
135 STN-PSTN Pitx2 Glut	Apod	1.35e-14	2.09e-10	0.0946628
135 STN-PSTN Pitx2 Glut	Rpl35a	6.32e-13	9.72e-09	0.0361291
135 STN-PSTN Pitx2 Glut	Ndufb4	1.16e-12	1.78e-08	0.0466196
135 STN-PSTN Pitx2 Glut	Adprh	1.29e-09	1.97e-05	0.0444749
135 STN-PSTN Pitx2 Glut	Gap43	1.87e-08	0.00028494	0.0240077
135 STN-PSTN Pitx2 Glut	Tagln3	1.17e-08	0.00017934	0.0365143
135 STN-PSTN Pitx2 Glut	Rpl24	3.49e-19	5.38e-15	0.0400998
135 STN-PSTN Pitx2 Glut	Atp5pf	3.43e-12	5.28e-08	0.0318112
135 STN-PSTN Pitx2 Glut	Atp5po	4.87e-16	7.5e-12	0.0392931
135 STN-PSTN Pitx2 Glut	Cbr1	2.18e-07	0.00331485	0.0392799
135 STN-PSTN Pitx2 Glut	Tmem181a	5.11e-07	0.00777875	-0.0315684
135 STN-PSTN Pitx2 Glut	Psmb1	3.72e-10	5.7e-06	0.0339183
135 STN-PSTN Pitx2 Glut	Elob	2.95e-09	4.51e-05	0.028466
135 STN-PSTN Pitx2 Glut	Atp6v0c	2.18e-21	3.38e-17	0.0302923
135 STN-PSTN Pitx2 Glut	Rps2	5.04e-07	0.0076734	0.0254476
135 STN-PSTN Pitx2 Glut	Ndufb10	2.58e-13	3.97e-09	0.0438545
135 STN-PSTN Pitx2 Glut	Antkmt	6.23e-09	9.53e-05	0.0306142
135 STN-PSTN Pitx2 Glut	Rps10	1.07e-27	1.66e-23	0.0550386
135 STN-PSTN Pitx2 Glut	Rpl10a	1.7e-08	0.00025973	0.0322558
135 STN-PSTN Pitx2 Glut	Rps18	2.12e-12	3.26e-08	0.045347
135 STN-PSTN Pitx2 Glut	Tubb5	1.74e-09	2.67e-05	0.0354561
135 STN-PSTN Pitx2 Glut	Ppp1r11	2.56e-07	0.00389855	0.0392458
135 STN-PSTN Pitx2 Glut	Rn18s-rs5	1.32e-23	2.03e-19	0.0316165
135 STN-PSTN Pitx2 Glut	Hsp90ab1	5.05e-25	7.8e-21	0.0421469
135 STN-PSTN Pitx2 Glut	Ptprs	2.96e-11	4.54e-07	-0.0265645
135 STN-PSTN Pitx2 Glut	Micos13	1.11e-08	0.00017004	0.0479515
135 STN-PSTN Pitx2 Glut	Rpl36	1.77e-06	0.0268935	0.0273038
135 STN-PSTN Pitx2 Glut	Ndufa11	2.18e-24	3.37e-20	0.0536117
135 STN-PSTN Pitx2 Glut	Ndufv2	2.24e-08	0.00034163	0.0249907
135 STN-PSTN Pitx2 Glut	Cox7a2l	1.48e-10	2.27e-06	0.0384334
135 STN-PSTN Pitx2 Glut	Calm2	1.39e-08	0.00021249	0.0191962
135 STN-PSTN Pitx2 Glut	Gm49980	8.3e-16	1.28e-11	-0.0900264
135 STN-PSTN Pitx2 Glut	Epb41l4a	2.32e-06	0.035209	-0.104336
135 STN-PSTN Pitx2 Glut	Reep5	1.76e-06	0.0266664	0.0220174
135 STN-PSTN Pitx2 Glut	Ndfip1	1.2e-09	1.83e-05	0.0180598
135 STN-PSTN Pitx2 Glut	Rps14	2.21e-18	3.41e-14	0.0439681
135 STN-PSTN Pitx2 Glut	Sec11c	1.31e-06	0.0198631	0.0331579
135 STN-PSTN Pitx2 Glut	Rpl17	1.01e-22	1.56e-18	0.0395184
135 STN-PSTN Pitx2 Glut	Ndufs8	2.42e-10	3.7e-06	0.0428319
135 STN-PSTN Pitx2 Glut	Ndufv1	2.76e-08	0.00042129	0.0376047
135 STN-PSTN Pitx2 Glut	Gstp1	2.93e-07	0.0044664	0.0584748
135 STN-PSTN Pitx2 Glut	Cfl1	2.05e-12	3.16e-08	0.038554
135 STN-PSTN Pitx2 Glut	Malat1	2.22e-18	3.43e-14	-0.0124345
135 STN-PSTN Pitx2 Glut	Fau	2.66e-20	4.1e-16	0.0426815
135 STN-PSTN Pitx2 Glut	Znhit2	2.83e-07	0.00430842	0.111696
135 STN-PSTN Pitx2 Glut	Prdx5	4.17e-19	6.44e-15	0.0460101
135 STN-PSTN Pitx2 Glut	Fkbp2	2.44e-10	3.75e-06	0.0345749
135 STN-PSTN Pitx2 Glut	Eef1g	3.03e-09	4.63e-05	0.0323628
135 STN-PSTN Pitx2 Glut	Fth1	4.75e-20	7.34e-16	0.0423803
135 STN-PSTN Pitx2 Glut	Pgam1	7.37e-07	0.0111977	0.0266081
135 STN-PSTN Pitx2 Glut	Got1	2.47e-07	0.00376785	0.0290632
135 STN-PSTN Pitx2 Glut	Ndufb8	8.99e-12	1.38e-07	0.0314795
135 STN-PSTN Pitx2 Glut	Cuedc2	6.82e-10	1.05e-05	0.0450219
135 STN-PSTN Pitx2 Glut	Atp5mk	7.43e-11	1.14e-06	0.0373189
135 STN-PSTN Pitx2 Glut	Tcf7l2	3.12e-07	0.00474985	-0.184809
138 PH Pitx2 Glut	Snhg11	2.93e-06	0.0365119	-0.0118309
138 PH Pitx2 Glut	Rplp2	7.08e-07	0.00882865	0.0484054
138 PH Pitx2 Glut	Rplp1	2.04e-06	0.0254076	0.0374758
138 PH Pitx2 Glut	Rpsa	1.25e-06	0.0155931	0.0419534
138 PH Pitx2 Glut	Rps27a	1.35e-06	0.0168066	0.0454038
138 PH Pitx2 Glut	Spcs1	1.67e-07	0.00208265	0.0481408
138 PH Pitx2 Glut	Rpl24	1.51e-07	0.00188036	0.0471249
138 PH Pitx2 Glut	Malat1	2.98e-07	0.00371881	-0.0152803
139 PH-LHA Foxb1 Glut	Snhg11	5.82e-07	0.00754275	-0.012842
139 PH-LHA Foxb1 Glut	Stmn3	5.85e-08	0.00075851	0.0386091
139 PH-LHA Foxb1 Glut	Ndufb5	1.12e-06	0.0144494	0.0452769
139 PH-LHA Foxb1 Glut	Uqcrh	1.9e-08	0.00024674	0.0510873
139 PH-LHA Foxb1 Glut	Rpl9	2.92e-06	0.0378129	0.0424563
139 PH-LHA Foxb1 Glut	Chchd2	3.63e-06	0.0470163	0.04052
139 PH-LHA Foxb1 Glut	Coxfa4	2.35e-08	0.00030411	0.0477747
139 PH-LHA Foxb1 Glut	Htra1	4.3e-07	0.00557775	0.143785
139 PH-LHA Foxb1 Glut	Cox4i1	1.83e-07	0.00237697	0.0409644
139 PH-LHA Foxb1 Glut	Rpl13	2.95e-06	0.0382123	0.0374101
139 PH-LHA Foxb1 Glut	Hspa8	2.09e-06	0.0271233	0.0376201
139 PH-LHA Foxb1 Glut	Rpsa	2.67e-07	0.00346056	0.0426083
139 PH-LHA Foxb1 Glut	Rps12	7.19e-07	0.00931846	0.0557983
139 PH-LHA Foxb1 Glut	Nme1	1.47e-08	0.00019067	0.0632874
139 PH-LHA Foxb1 Glut	Rpl23	1.02e-08	0.0001322	0.0580652
139 PH-LHA Foxb1 Glut	Rpl19	1.62e-06	0.0210026	0.0415843
139 PH-LHA Foxb1 Glut	Rps24	1.16e-06	0.0150371	0.0477378
139 PH-LHA Foxb1 Glut	Apod	1.05e-09	1.36e-05	0.155625
139 PH-LHA Foxb1 Glut	Rn18s-rs5	5.95e-13	7.71e-09	0.0427186
139 PH-LHA Foxb1 Glut	Ndufv2	2.23e-06	0.0288472	0.0426244
139 PH-LHA Foxb1 Glut	Rps14	6.76e-07	0.00876429	0.0463062
139 PH-LHA Foxb1 Glut	Fkbp2	1.78e-07	0.00231355	0.0557902
139 PH-LHA Foxb1 Glut	Fth1	4.91e-08	0.00063648	0.0541391
156 MB-ant-ve Dmrta2 Glut	Malat1	2.08e-09	2e-05	-0.0255275
165 PAG-MRN Pou3f1 Glut	Ubc	1.99e-07	0.00221231	0.0672255
165 PAG-MRN Pou3f1 Glut	Hspa8	5.5e-08	0.00061251	0.0586382
165 PAG-MRN Pou3f1 Glut	Rpsa	3.98e-07	0.00443112	0.0684972
165 PAG-MRN Pou3f1 Glut	Calm1	1.81e-06	0.0201571	0.0491458
165 PAG-MRN Pou3f1 Glut	Hsp90aa1	3.91e-07	0.00434596	0.0589492
165 PAG-MRN Pou3f1 Glut	Hsp90ab1	2.16e-07	0.00240113	0.05611
166 MRN Pou3f1 C1ql4 Glut	Rpl7	3.8e-08	0.00056922	0.0327789
166 MRN Pou3f1 C1ql4 Glut	Cox5b	3.28e-09	4.91e-05	0.0323322
166 MRN Pou3f1 C1ql4 Glut	Eef1b2	1.7e-06	0.0253603	0.0307923
166 MRN Pou3f1 C1ql4 Glut	Ptgds	1.82e-10	2.73e-06	0.0598455
166 MRN Pou3f1 C1ql4 Glut	Rpl7a	2.63e-07	0.00392244	0.0331516
166 MRN Pou3f1 C1ql4 Glut	Rpl12	1.68e-10	2.51e-06	0.0404506
166 MRN Pou3f1 C1ql4 Glut	Rpl35	3.9e-08	0.00058367	0.0460093
166 MRN Pou3f1 C1ql4 Glut	Dynlrb1	3.59e-07	0.00535661	0.0361093
166 MRN Pou3f1 C1ql4 Glut	Snhg11	8.06e-10	1.21e-05	-0.0109747
166 MRN Pou3f1 C1ql4 Glut	Dbndd2	3.15e-07	0.00470273	0.0365913
166 MRN Pou3f1 C1ql4 Glut	Rps21	1.45e-06	0.0215964	0.0277855
166 MRN Pou3f1 C1ql4 Glut	Stmn3	1.19e-13	1.79e-09	0.0314912
166 MRN Pou3f1 C1ql4 Glut	Rpl22l1	2.95e-06	0.0439676	0.0291644
166 MRN Pou3f1 C1ql4 Glut	Ndufb5	7.95e-12	1.19e-07	0.0401191
166 MRN Pou3f1 C1ql4 Glut	Rps3a1	7.16e-11	1.07e-06	0.0350139
166 MRN Pou3f1 C1ql4 Glut	Rps27	1.13e-06	0.016939	0.0307993
166 MRN Pou3f1 C1ql4 Glut	Psmb4	1.1e-07	0.00164153	0.0403611
166 MRN Pou3f1 C1ql4 Glut	Gstm1	1.06e-10	1.59e-06	0.0744252
166 MRN Pou3f1 C1ql4 Glut	H2az1	5.29e-09	7.92e-05	0.0369327
166 MRN Pou3f1 C1ql4 Glut	Rps20	5.25e-08	0.00078507	0.0347812
166 MRN Pou3f1 C1ql4 Glut	Gm17167	5.47e-07	0.00816716	0.435297
166 MRN Pou3f1 C1ql4 Glut	Rps6	9.1e-12	1.37e-07	0.0398604
166 MRN Pou3f1 C1ql4 Glut	Uqcrh	6.73e-08	0.00100623	0.0336224
166 MRN Pou3f1 C1ql4 Glut	Rps8	2.95e-13	4.42e-09	0.0339128
166 MRN Pou3f1 C1ql4 Glut	Rpl11	1.9e-06	0.0283874	0.0240247
166 MRN Pou3f1 C1ql4 Glut	Rpl9	5.53e-09	8.27e-05	0.0299269
166 MRN Pou3f1 C1ql4 Glut	Dynll1	1.04e-07	0.00155788	0.0351424
166 MRN Pou3f1 C1ql4 Glut	Ubc	5.6e-08	0.0008376	0.0269904
166 MRN Pou3f1 C1ql4 Glut	Chchd2	1.02e-11	1.53e-07	0.0365898
166 MRN Pou3f1 C1ql4 Glut	Rpl21	1.62e-06	0.0241408	0.023984
166 MRN Pou3f1 C1ql4 Glut	Coxfa4	7.75e-11	1.16e-06	0.0314078
166 MRN Pou3f1 C1ql4 Glut	Gapdh	2.71e-06	0.0404279	0.0214346
166 MRN Pou3f1 C1ql4 Glut	Rps9	1.07e-13	1.6e-09	0.0447754
166 MRN Pou3f1 C1ql4 Glut	Rps5	7.93e-07	0.0118414	0.0275084
166 MRN Pou3f1 C1ql4 Glut	Apoe	6.21e-10	9.31e-06	0.0421622
166 MRN Pou3f1 C1ql4 Glut	Rps19	2.02e-07	0.00302299	0.032352
166 MRN Pou3f1 C1ql4 Glut	Rabac1	3.02e-07	0.0045097	0.0221295
166 MRN Pou3f1 C1ql4 Glut	Ppp1r14a	6.77e-08	0.00101201	0.048738
166 MRN Pou3f1 C1ql4 Glut	Rpl13a	1.65e-08	0.00024665	0.0321424
166 MRN Pou3f1 C1ql4 Glut	Rpl18	1.71e-13	2.56e-09	0.0442632
166 MRN Pou3f1 C1ql4 Glut	Ndufc2	3.3e-09	4.95e-05	0.032094
166 MRN Pou3f1 C1ql4 Glut	Rps3	1.69e-08	0.00025256	0.0332321
166 MRN Pou3f1 C1ql4 Glut	Rps13	2.43e-06	0.0362407	0.0275725
166 MRN Pou3f1 C1ql4 Glut	Rps15a	1.38e-06	0.0205791	0.030366
166 MRN Pou3f1 C1ql4 Glut	Htra1	1.46e-07	0.00217982	0.0879632
166 MRN Pou3f1 C1ql4 Glut	Rplp2	1.26e-08	0.00018799	0.0340516
166 MRN Pou3f1 C1ql4 Glut	Slc25a4	4.08e-09	6.11e-05	0.0295077
166 MRN Pou3f1 C1ql4 Glut	Cope	2.33e-06	0.034798	0.0383296
166 MRN Pou3f1 C1ql4 Glut	Gabarapl2	2.13e-06	0.031801	0.0287496
166 MRN Pou3f1 C1ql4 Glut	Cox4i1	1.97e-09	2.96e-05	0.0273867
166 MRN Pou3f1 C1ql4 Glut	Rpl13	5.28e-08	0.00078992	0.0271171
166 MRN Pou3f1 C1ql4 Glut	Hspa8	1.08e-07	0.00162174	0.0230889
166 MRN Pou3f1 C1ql4 Glut	Atp5mg	1.56e-07	0.00233557	0.0312094
166 MRN Pou3f1 C1ql4 Glut	Rplp1	6.92e-13	1.04e-08	0.0333259
166 MRN Pou3f1 C1ql4 Glut	Eef1a1	1.38e-07	0.00206163	0.0232531
166 MRN Pou3f1 C1ql4 Glut	Rpsa	1.51e-14	2.26e-10	0.0389253
166 MRN Pou3f1 C1ql4 Glut	Rpl14	3.01e-08	0.0004509	0.0306651
166 MRN Pou3f1 C1ql4 Glut	Sgk1	2.51e-08	0.00037559	0.0377275
166 MRN Pou3f1 C1ql4 Glut	Rps12	1.46e-06	0.0217406	0.0298274
166 MRN Pou3f1 C1ql4 Glut	Mif	4.54e-07	0.0067817	0.0280356
166 MRN Pou3f1 C1ql4 Glut	Gpx4	2.94e-10	4.4e-06	0.0336205
166 MRN Pou3f1 C1ql4 Glut	Ndufs7	3.41e-09	5.1e-05	0.0377595
166 MRN Pou3f1 C1ql4 Glut	Selenom	6.93e-09	0.00010372	0.0327804
166 MRN Pou3f1 C1ql4 Glut	Ppia	9.68e-08	0.00144752	0.0242005
166 MRN Pou3f1 C1ql4 Glut	Rps27a	3.92e-09	5.87e-05	0.03238
166 MRN Pou3f1 C1ql4 Glut	Npm1	6.32e-10	9.47e-06	0.0460125
166 MRN Pou3f1 C1ql4 Glut	Hint1	9.71e-11	1.46e-06	0.034615
166 MRN Pou3f1 C1ql4 Glut	Ubb	1.94e-08	0.00029018	0.0238251
166 MRN Pou3f1 C1ql4 Glut	Rpl26	4.5e-09	6.74e-05	0.0309787
166 MRN Pou3f1 C1ql4 Glut	Psmb6	1.47e-07	0.00219656	0.0390697
166 MRN Pou3f1 C1ql4 Glut	Nme1	3.94e-07	0.00588616	0.0336296
166 MRN Pou3f1 C1ql4 Glut	Rpl23	2.68e-10	4.02e-06	0.0379064
166 MRN Pou3f1 C1ql4 Glut	Rpl19	2.64e-13	3.96e-09	0.0359198
166 MRN Pou3f1 C1ql4 Glut	Rpl27	8.47e-08	0.00126728	0.0342072
166 MRN Pou3f1 C1ql4 Glut	Abca8a	5.33e-07	0.00796654	0.0605966
166 MRN Pou3f1 C1ql4 Glut	Rpl38	2.5e-07	0.00373133	0.029392
166 MRN Pou3f1 C1ql4 Glut	Atp5pd	1.32e-06	0.0197528	0.0272528
166 MRN Pou3f1 C1ql4 Glut	Rps7	6.61e-13	9.91e-09	0.0398563
166 MRN Pou3f1 C1ql4 Glut	Calm1	1.59e-06	0.0236966	0.0201759
166 MRN Pou3f1 C1ql4 Glut	Meg3	9.76e-07	0.0145712	-0.0094529
166 MRN Pou3f1 C1ql4 Glut	Hsp90aa1	1.69e-09	2.54e-05	0.0265037
166 MRN Pou3f1 C1ql4 Glut	Ighm	1.01e-07	0.00151602	0.212098
166 MRN Pou3f1 C1ql4 Glut	Nol7	1.47e-06	0.0219928	0.0488318
166 MRN Pou3f1 C1ql4 Glut	9330111N05Rik	1.79e-06	0.0266932	0.0639458
166 MRN Pou3f1 C1ql4 Glut	Rps23	3.22e-11	4.84e-07	0.0381818
166 MRN Pou3f1 C1ql4 Glut	Comtd1	5.08e-07	0.00758129	0.054668
166 MRN Pou3f1 C1ql4 Glut	Rps24	1.31e-10	1.97e-06	0.0367663
166 MRN Pou3f1 C1ql4 Glut	Spcs1	2.77e-06	0.0413302	0.0251688
166 MRN Pou3f1 C1ql4 Glut	Tpt1	2.18e-09	3.26e-05	0.0319601
166 MRN Pou3f1 C1ql4 Glut	Rpl30	7.51e-07	0.0112053	0.0278067
166 MRN Pou3f1 C1ql4 Glut	Cox6c	4.96e-10	7.43e-06	0.0352148
166 MRN Pou3f1 C1ql4 Glut	Rpl8	7.62e-10	1.14e-05	0.0329263
166 MRN Pou3f1 C1ql4 Glut	Apod	2.3e-30	3.45e-26	0.0964814
166 MRN Pou3f1 C1ql4 Glut	Rpl24	2e-10	3e-06	0.0326824
166 MRN Pou3f1 C1ql4 Glut	Cmss1	1.24e-07	0.0018474	0.0288303
166 MRN Pou3f1 C1ql4 Glut	Rps10	2.75e-10	4.12e-06	0.0335806
166 MRN Pou3f1 C1ql4 Glut	Rps28	6.45e-07	0.00962837	0.0392732
166 MRN Pou3f1 C1ql4 Glut	Rps18	2.31e-08	0.00034579	0.0384414
166 MRN Pou3f1 C1ql4 Glut	C4b	1.45e-07	0.00216971	0.154333
166 MRN Pou3f1 C1ql4 Glut	Csnk2b	4.02e-07	0.00599767	0.0480633
166 MRN Pou3f1 C1ql4 Glut	Rn18s-rs5	1.13e-29	1.7e-25	0.0414395
166 MRN Pou3f1 C1ql4 Glut	AY036118	5.18e-16	7.78e-12	0.0358959
166 MRN Pou3f1 C1ql4 Glut	Rps14	7.34e-10	1.1e-05	0.0332403
166 MRN Pou3f1 C1ql4 Glut	Rpl17	1.51e-06	0.0225045	0.0230094
166 MRN Pou3f1 C1ql4 Glut	Malat1	7.95e-08	0.0011893	-0.0106408
166 MRN Pou3f1 C1ql4 Glut	Fau	1.69e-08	0.00025274	0.0276417
166 MRN Pou3f1 C1ql4 Glut	Fth1	6.17e-17	9.26e-13	0.0408256
166 MRN Pou3f1 C1ql4 Glut	Atp5mk	1.48e-06	0.0220431	0.0314296
168 SPA-SPFm-SPFp-POL-PIL-PoT Sp9 Glut	Rasgrf2	3.9e-07	0.00458393	0.0419017
168 SPA-SPFm-SPFp-POL-PIL-PoT Sp9 Glut	Malat1	4.84e-08	0.00056903	-0.0164664
195 SNr-VTA Pax5 Npas1 Gaba	Hspe1	1.28e-07	0.00166489	0.0565033
195 SNr-VTA Pax5 Npas1 Gaba	Mpc2	2.65e-06	0.0343237	0.0402527
195 SNr-VTA Pax5 Npas1 Gaba	Rpl12	1.59e-06	0.0205989	0.0474287
195 SNr-VTA Pax5 Npas1 Gaba	Snhg11	2.9e-08	0.00037607	-0.0127979
195 SNr-VTA Pax5 Npas1 Gaba	Stmn3	2.21e-06	0.0286326	0.0296446
195 SNr-VTA Pax5 Npas1 Gaba	Rps3a1	8.08e-10	1.05e-05	0.0521757
195 SNr-VTA Pax5 Npas1 Gaba	Psmb4	2.26e-07	0.00292477	0.063667
195 SNr-VTA Pax5 Npas1 Gaba	Rps6	7.52e-07	0.00974586	0.0480544
195 SNr-VTA Pax5 Npas1 Gaba	Uqcrh	1.91e-09	2.48e-05	0.0499466
195 SNr-VTA Pax5 Npas1 Gaba	Rpl9	3.7e-10	4.81e-06	0.0502509
195 SNr-VTA Pax5 Npas1 Gaba	Ubc	1.38e-06	0.0179183	0.0404813
195 SNr-VTA Pax5 Npas1 Gaba	Rps9	1.02e-07	0.00132455	0.0506837
195 SNr-VTA Pax5 Npas1 Gaba	Rps5	2.23e-07	0.00288894	0.0429123
195 SNr-VTA Pax5 Npas1 Gaba	Rps19	1.11e-07	0.00143875	0.0521407
195 SNr-VTA Pax5 Npas1 Gaba	Rpl13a	8.68e-07	0.0112483	0.0415914
195 SNr-VTA Pax5 Npas1 Gaba	Rpl18	8.44e-08	0.00109597	0.0479149
195 SNr-VTA Pax5 Npas1 Gaba	Rps3	8.59e-08	0.00111515	0.0474424
195 SNr-VTA Pax5 Npas1 Gaba	Slc25a4	3.08e-07	0.00399862	0.034453
195 SNr-VTA Pax5 Npas1 Gaba	Ndufb7	1.43e-07	0.00185552	0.0543197
195 SNr-VTA Pax5 Npas1 Gaba	Cox4i1	5.41e-08	0.00070307	0.0335439
195 SNr-VTA Pax5 Npas1 Gaba	Rpl13	1.55e-07	0.00201539	0.0358384
195 SNr-VTA Pax5 Npas1 Gaba	Hspa8	1.09e-10	1.42e-06	0.0403287
195 SNr-VTA Pax5 Npas1 Gaba	Rplp1	8.79e-10	1.14e-05	0.0440904
195 SNr-VTA Pax5 Npas1 Gaba	Eef1a1	3.45e-07	0.00446851	0.0392817
195 SNr-VTA Pax5 Npas1 Gaba	Rpsa	1.37e-07	0.00178375	0.0410636
195 SNr-VTA Pax5 Npas1 Gaba	Rpl14	2.36e-12	3.06e-08	0.0625968
195 SNr-VTA Pax5 Npas1 Gaba	Bsg	4.94e-07	0.00640993	0.0333253
195 SNr-VTA Pax5 Npas1 Gaba	Rps15	2.72e-06	0.0352463	0.0365993
195 SNr-VTA Pax5 Npas1 Gaba	Naca	3.55e-06	0.0459549	0.0479421
195 SNr-VTA Pax5 Npas1 Gaba	Atp5f1b	8.1e-08	0.00105193	0.0339733
195 SNr-VTA Pax5 Npas1 Gaba	Ppia	2.31e-09	2.99e-05	0.0420396
195 SNr-VTA Pax5 Npas1 Gaba	Rps27a	1.44e-07	0.00186732	0.0442884
195 SNr-VTA Pax5 Npas1 Gaba	Hint1	2.23e-09	2.9e-05	0.0470299
195 SNr-VTA Pax5 Npas1 Gaba	Ubb	5.37e-11	6.99e-07	0.0425345
195 SNr-VTA Pax5 Npas1 Gaba	Rpl26	5.83e-09	7.57e-05	0.0483735
195 SNr-VTA Pax5 Npas1 Gaba	Rpl19	1.33e-10	1.72e-06	0.0487916
195 SNr-VTA Pax5 Npas1 Gaba	Rpl27	1.86e-06	0.0241461	0.0450934
195 SNr-VTA Pax5 Npas1 Gaba	Rps7	2.33e-07	0.00301519	0.0445304
195 SNr-VTA Pax5 Npas1 Gaba	Psma6	5.58e-07	0.00723215	0.0653954
195 SNr-VTA Pax5 Npas1 Gaba	Fkbp3	3.34e-08	0.00043325	0.0454926
195 SNr-VTA Pax5 Npas1 Gaba	Rps29	8e-07	0.0103651	0.0482564
195 SNr-VTA Pax5 Npas1 Gaba	Rtn1	3.12e-07	0.00404014	0.025743
195 SNr-VTA Pax5 Npas1 Gaba	Hsp90aa1	1.38e-07	0.00179291	0.0362549
195 SNr-VTA Pax5 Npas1 Gaba	Cox7c	2.21e-06	0.0285693	0.0340541
195 SNr-VTA Pax5 Npas1 Gaba	Spcs1	1.96e-09	2.55e-05	0.0555979
195 SNr-VTA Pax5 Npas1 Gaba	Gm10076	3.03e-06	0.0391845	0.112454
195 SNr-VTA Pax5 Npas1 Gaba	Cox6c	1.17e-08	0.00015244	0.0419441
195 SNr-VTA Pax5 Npas1 Gaba	Pam16	1.05e-06	0.0136476	0.0646065
195 SNr-VTA Pax5 Npas1 Gaba	Apod	1.45e-07	0.00188635	0.103887
195 SNr-VTA Pax5 Npas1 Gaba	Rpl35a	4.2e-08	0.00054582	0.0488242
195 SNr-VTA Pax5 Npas1 Gaba	Atp5po	8.14e-07	0.0105549	0.0421548
195 SNr-VTA Pax5 Npas1 Gaba	Rps10	6.89e-10	8.95e-06	0.052581
195 SNr-VTA Pax5 Npas1 Gaba	Rps18	3.02e-06	0.0391549	0.0469201
195 SNr-VTA Pax5 Npas1 Gaba	Ndufa11	3.41e-06	0.044085	0.0391565
195 SNr-VTA Pax5 Npas1 Gaba	Rps14	2.69e-06	0.034835	0.0383081
195 SNr-VTA Pax5 Npas1 Gaba	Rpl17	4.08e-08	0.00053028	0.036871
195 SNr-VTA Pax5 Npas1 Gaba	Malat1	2.2e-08	0.00028564	-0.0130013
195 SNr-VTA Pax5 Npas1 Gaba	Fau	1.98e-07	0.00256838	0.0400575
195 SNr-VTA Pax5 Npas1 Gaba	Prdx5	4.18e-10	5.43e-06	0.0516444
195 SNr-VTA Pax5 Npas1 Gaba	Fth1	1.77e-10	2.3e-06	0.0498849
197 SNr Six3 Gaba	Rpl7	1.99e-43	3.64e-39	0.0415569
197 SNr Six3 Gaba	Eloc	8.17e-07	0.0143893	0.0211007
197 SNr Six3 Gaba	Cox5b	6.6e-37	1.2e-32	0.0335725
197 SNr Six3 Gaba	Unc50	2.28e-08	0.00040468	0.0241418
197 SNr Six3 Gaba	Mrpl30	8.98e-16	1.62e-11	0.034444
197 SNr Six3 Gaba	Rpl31	1.92e-11	3.45e-07	0.0231481
197 SNr Six3 Gaba	Map4k4	8.14e-07	0.0143423	-0.0171169
197 SNr Six3 Gaba	Hspd1	1.93e-08	0.0003422	0.0255433
197 SNr Six3 Gaba	Hspe1	3.69e-18	6.69e-14	0.0325006
197 SNr Six3 Gaba	Ndufb3	1.29e-11	2.31e-07	0.0241
197 SNr Six3 Gaba	Eef1b2	9.5e-38	1.73e-33	0.0417066
197 SNr Six3 Gaba	Rpl37a	2.6e-15	4.7e-11	0.0244714
197 SNr Six3 Gaba	Aamp	3.95e-07	0.00696532	0.0260885
197 SNr Six3 Gaba	Tuba4a	6.12e-23	1.11e-18	0.0335064
197 SNr Six3 Gaba	Resp18	3.74e-34	6.82e-30	0.0268347
197 SNr Six3 Gaba	Itm2c	1.23e-07	0.00218255	0.016603
197 SNr Six3 Gaba	Ncl	3.42e-15	6.17e-11	0.0347861
197 SNr Six3 Gaba	Ndufa10	2.44e-07	0.00430823	0.0155191
197 SNr Six3 Gaba	Cops9	1.35e-11	2.42e-07	0.0306522
197 SNr Six3 Gaba	Relch	2.38e-06	0.0417003	-0.0121121
197 SNr Six3 Gaba	Tsn	4.44e-08	0.0007875	0.0180662
197 SNr Six3 Gaba	Clasp1	7.6e-08	0.00134607	-0.0125791
197 SNr Six3 Gaba	Ptpn4	4.26e-07	0.00752535	-0.0123199
197 SNr Six3 Gaba	Gm16083	1.14e-10	2.04e-06	-0.0265512
197 SNr Six3 Gaba	Snrpe	1.13e-15	2.04e-11	0.0449958
197 SNr Six3 Gaba	Phlda3	6.33e-12	1.14e-07	0.0338693
197 SNr Six3 Gaba	Tmem9	1.39e-08	0.00024758	0.0238726
197 SNr Six3 Gaba	Rgs2	2.35e-08	0.00041738	0.0321027
197 SNr Six3 Gaba	Ivns1abp	7.11e-08	0.00125942	-0.0221856
197 SNr Six3 Gaba	Mrps14	9.23e-10	1.65e-05	0.030326
197 SNr Six3 Gaba	Cacybp	9.25e-09	0.00016449	0.0260786
197 SNr Six3 Gaba	Rabgap1l	2.47e-06	0.043302	-0.0080608
197 SNr Six3 Gaba	Atp1b1	3.25e-12	5.83e-08	0.0108176
197 SNr Six3 Gaba	Mpc2	1.9e-13	3.42e-09	0.0214528
197 SNr Six3 Gaba	Creg1	8.08e-10	1.44e-05	0.0380954
197 SNr Six3 Gaba	Tmco1	5.06e-11	9.07e-07	0.0250843
197 SNr Six3 Gaba	Mgst3	4.11e-15	7.42e-11	0.0295937
197 SNr Six3 Gaba	Pbx1	2.33e-07	0.00411618	-0.0114219
197 SNr Six3 Gaba	Ndufs2	1.42e-12	2.54e-08	0.0261951
197 SNr Six3 Gaba	Pfdn2	3.58e-11	6.41e-07	0.0285324
197 SNr Six3 Gaba	Catspere2	5.66e-09	0.00010078	-0.0192488
197 SNr Six3 Gaba	Srp9	6.32e-07	0.011148	0.0225036
197 SNr Six3 Gaba	Mark1	2.75e-06	0.0482084	-0.0156943
197 SNr Six3 Gaba	Nenf	6.79e-13	1.22e-08	0.0231843
197 SNr Six3 Gaba	G0s2	1.56e-07	0.00276168	0.0372143
197 SNr Six3 Gaba	Celf2	1.11e-09	1.98e-05	-0.0122159
197 SNr Six3 Gaba	Atp5f1c	5.35e-13	9.63e-09	0.0180235
197 SNr Six3 Gaba	Spag6	5.22e-07	0.00921554	0.0760692
197 SNr Six3 Gaba	Tubb4b	4.03e-39	7.36e-35	0.0404018
197 SNr Six3 Gaba	Ptgds	1.54e-34	2.8e-30	0.0704112
197 SNr Six3 Gaba	Edf1	1.42e-23	2.59e-19	0.0345755
197 SNr Six3 Gaba	Bmyc	5.36e-10	9.57e-06	0.0210421
197 SNr Six3 Gaba	Rpl7a	5.27e-36	9.6e-32	0.0396031
197 SNr Six3 Gaba	Surf1	3.69e-10	6.59e-06	0.0308858
197 SNr Six3 Gaba	Set	6.14e-07	0.0108297	0.0194966
197 SNr Six3 Gaba	Swi5	1.08e-08	0.00019272	0.0222452
197 SNr Six3 Gaba	Bbln	3.3e-11	5.92e-07	0.0296256
197 SNr Six3 Gaba	Rpl12	1.45e-36	2.64e-32	0.0401039
197 SNr Six3 Gaba	Hspa5	3.49e-09	6.21e-05	0.0176186
197 SNr Six3 Gaba	Rab14	1.36e-12	2.45e-08	0.0181891
197 SNr Six3 Gaba	Ndufa8	1.84e-11	3.31e-07	0.0225471
197 SNr Six3 Gaba	Psmb7	3.33e-08	0.00059109	0.0172884
197 SNr Six3 Gaba	Rpl35	1.97e-17	3.57e-13	0.0382415
197 SNr Six3 Gaba	Arpc5l	3.13e-11	5.61e-07	0.0261251
197 SNr Six3 Gaba	Ssb	1.78e-06	0.0312744	0.0158267
197 SNr Six3 Gaba	Atp5mc3	3.86e-26	7.03e-22	0.0308442
197 SNr Six3 Gaba	Selenoh	6.36e-13	1.14e-08	0.04493
197 SNr Six3 Gaba	Tmx2	7.24e-07	0.0127575	0.0148361
197 SNr Six3 Gaba	Timm10	1.1e-07	0.00195125	0.0379683
197 SNr Six3 Gaba	Psmc3	7.07e-11	1.27e-06	0.0307193
197 SNr Six3 Gaba	Mir670hg	8.08e-07	0.0142388	-0.0291945
197 SNr Six3 Gaba	Cd59a	9.84e-08	0.00174271	-0.0306678
197 SNr Six3 Gaba	Nop10	1.54e-10	2.76e-06	0.0272752
197 SNr Six3 Gaba	Emc4	5.83e-17	1.05e-12	0.0249591
197 SNr Six3 Gaba	Emc7	2.64e-20	4.79e-16	0.0281646
197 SNr Six3 Gaba	Srp14	3.87e-12	6.96e-08	0.0286545
197 SNr Six3 Gaba	Ckmt1	2.72e-10	4.87e-06	0.0220807
197 SNr Six3 Gaba	Pdia3	2.64e-06	0.0462517	0.0143503
197 SNr Six3 Gaba	Serf2	1.71e-12	3.08e-08	0.0252119
197 SNr Six3 Gaba	B2m	1.9e-09	3.39e-05	0.0460778
197 SNr Six3 Gaba	Eid1	7.3e-07	0.0128632	0.0165335
197 SNr Six3 Gaba	Nop56	7.26e-13	1.31e-08	0.0274398
197 SNr Six3 Gaba	Ddrgk1	3.33e-12	5.98e-08	0.0257214
197 SNr Six3 Gaba	Snap25	1.25e-10	2.23e-06	0.00916809
197 SNr Six3 Gaba	Smim26	1.98e-07	0.00350195	0.0259324
197 SNr Six3 Gaba	Cst3	7.29e-10	1.3e-05	0.0215687
197 SNr Six3 Gaba	Nrsn2	8.32e-09	0.00014811	0.0160996
197 SNr Six3 Gaba	Eif2s2	4.45e-07	0.00785185	0.0185764
197 SNr Six3 Gaba	Dynlrb1	3.63e-15	6.55e-11	0.0273868
197 SNr Six3 Gaba	Map1lc3a	1.35e-07	0.00238332	0.0158687
197 SNr Six3 Gaba	Eif6	2.31e-10	4.13e-06	0.0431628
197 SNr Six3 Gaba	Snhg11	1.36e-41	2.48e-37	-0.0102169
197 SNr Six3 Gaba	Slc32a1	1.84e-11	3.3e-07	0.0177892
197 SNr Six3 Gaba	Dhx35	9.97e-07	0.017545	-0.0269726
197 SNr Six3 Gaba	Ywhab	1.84e-10	3.29e-06	0.0186425
197 SNr Six3 Gaba	Dbndd2	3.05e-24	5.54e-20	0.0445054
197 SNr Six3 Gaba	Zfas1	1.02e-10	1.83e-06	0.0370267
197 SNr Six3 Gaba	Pfdn4	1.35e-06	0.0236634	0.0264531
197 SNr Six3 Gaba	Gnas	1e-12	1.8e-08	0.0113641
197 SNr Six3 Gaba	Gm20721	1.17e-06	0.0205466	-0.0253036
197 SNr Six3 Gaba	Ctsz	1.02e-08	0.00018084	0.0506284
197 SNr Six3 Gaba	Atp5f1e	7.01e-19	1.27e-14	0.0354689
197 SNr Six3 Gaba	Prelid3b	1.59e-06	0.0278849	0.0367581
197 SNr Six3 Gaba	Psma7	7.86e-14	1.42e-09	0.0249667
197 SNr Six3 Gaba	Adrm1	5.56e-09	9.9e-05	0.0353872
197 SNr Six3 Gaba	Rps21	1.86e-21	3.38e-17	0.0281173
197 SNr Six3 Gaba	Eef1a2	1.95e-08	0.00034591	0.0166913
197 SNr Six3 Gaba	Stmn3	9.6e-88	1.76e-83	0.0399867
197 SNr Six3 Gaba	Stmn2	3.05e-12	5.48e-08	0.0146845
197 SNr Six3 Gaba	Fabp5	7.29e-15	1.32e-10	0.031058
197 SNr Six3 Gaba	Rbis	9.14e-07	0.0160973	0.0203421
197 SNr Six3 Gaba	Fndc3b	3.83e-07	0.00676838	-0.0195739
197 SNr Six3 Gaba	Rpl22l1	2.65e-33	4.84e-29	0.0353516
197 SNr Six3 Gaba	Sec62	1.15e-20	2.08e-16	0.0205664
197 SNr Six3 Gaba	Mrpl47	7.34e-07	0.0129301	0.0302669
197 SNr Six3 Gaba	Ndufb5	2.26e-55	4.14e-51	0.0422512
197 SNr Six3 Gaba	Usp13	1.83e-06	0.0321447	-0.0198771
197 SNr Six3 Gaba	Atp11b	2.41e-17	4.36e-13	-0.0187717
197 SNr Six3 Gaba	Ndufc1	3.86e-16	6.97e-12	0.0303352
197 SNr Six3 Gaba	Rps3a1	1.4e-68	2.57e-64	0.0470498
197 SNr Six3 Gaba	Hapln2	2.36e-14	4.25e-10	0.0573222
197 SNr Six3 Gaba	Naxe	1.66e-09	2.95e-05	0.0251601
197 SNr Six3 Gaba	Lamtor2	1.36e-14	2.45e-10	0.0324569
197 SNr Six3 Gaba	1500004A13Rik	3.17e-08	0.00056241	-0.0151403
197 SNr Six3 Gaba	Scamp3	2.58e-09	4.6e-05	0.0336057
197 SNr Six3 Gaba	Kcnn3	4.76e-08	0.00084424	-0.0363134
197 SNr Six3 Gaba	Rps27	4.04e-18	7.32e-14	0.0290977
197 SNr Six3 Gaba	S100a1	1.28e-06	0.0225518	0.0438919
197 SNr Six3 Gaba	Lor	1.7e-06	0.0299378	0.0532399
197 SNr Six3 Gaba	S100a10	1.1e-06	0.0193615	0.0562101
197 SNr Six3 Gaba	Psmb4	1.39e-25	2.53e-21	0.0388491
197 SNr Six3 Gaba	Psmd4	9.62e-07	0.0169426	0.0181263
197 SNr Six3 Gaba	Phgdh	3.91e-09	6.96e-05	0.0457526
197 SNr Six3 Gaba	Atp5pb	4.87e-30	8.87e-26	0.0278675
197 SNr Six3 Gaba	Lamtor5	4.18e-09	7.45e-05	0.0278682
197 SNr Six3 Gaba	Gstm5	3.71e-24	6.74e-20	0.037886
197 SNr Six3 Gaba	Gstm7	1.07e-07	0.00189465	0.057928
197 SNr Six3 Gaba	Gstm1	3.62e-30	6.58e-26	0.0794273
197 SNr Six3 Gaba	Psma5	2.28e-07	0.00402607	0.0225643
197 SNr Six3 Gaba	Sars1	1.12e-09	1.99e-05	0.0199984
197 SNr Six3 Gaba	Rpl34	1.9e-29	3.45e-25	0.0367992
197 SNr Six3 Gaba	H2az1	2.99e-41	5.46e-37	0.0401209
197 SNr Six3 Gaba	Selenof	3.71e-08	0.00065748	0.019014
197 SNr Six3 Gaba	Rps20	2.8e-20	5.08e-16	0.0292257
197 SNr Six3 Gaba	Pnisr	3.24e-15	5.84e-11	0.0151593
197 SNr Six3 Gaba	Cnr1	1.52e-06	0.0267869	0.0197549
197 SNr Six3 Gaba	Ndufb6	3.86e-31	7.03e-27	0.0446863
197 SNr Six3 Gaba	Dnaja1	2.1e-12	3.78e-08	0.0217047
197 SNr Six3 Gaba	Dctn3	2.19e-12	3.94e-08	0.0304718
197 SNr Six3 Gaba	Gm17167	7.76e-12	1.39e-07	0.407791
197 SNr Six3 Gaba	Creb3	1.52e-07	0.00268762	0.0291742
197 SNr Six3 Gaba	Hint2	5.85e-14	1.05e-09	0.0446736
197 SNr Six3 Gaba	Clta	5.44e-13	9.8e-09	0.0220203
197 SNr Six3 Gaba	Grhpr	2.77e-06	0.0485563	0.0259022
197 SNr Six3 Gaba	Tomm5	5.43e-16	9.81e-12	0.035465
197 SNr Six3 Gaba	Sec61b	3.82e-08	0.00067692	0.0334335
197 SNr Six3 Gaba	Atp6v1g1	3.81e-13	6.86e-09	0.0356006
197 SNr Six3 Gaba	Rraga	5.06e-09	9.01e-05	0.0291445
197 SNr Six3 Gaba	Rps6	6.45e-67	1.18e-62	0.0518676
197 SNr Six3 Gaba	Dab1	6.56e-09	0.00011676	-0.0142529
197 SNr Six3 Gaba	Tmem59	2.69e-13	4.85e-09	0.0155312
197 SNr Six3 Gaba	Uqcrh	3.7e-48	6.77e-44	0.0404615
197 SNr Six3 Gaba	Pik3r3	3.65e-07	0.00644304	-0.0287384
197 SNr Six3 Gaba	Akr1a1	5.26e-17	9.52e-13	0.0270289
197 SNr Six3 Gaba	Prdx1	6.34e-14	1.14e-09	0.0293065
197 SNr Six3 Gaba	Rps8	1.16e-59	2.12e-55	0.0382263
197 SNr Six3 Gaba	Atp6v0b	5.38e-15	9.7e-11	0.0108886
197 SNr Six3 Gaba	Pabpc4	1.09e-06	0.0192529	-0.0188186
197 SNr Six3 Gaba	Ndufs5	2.77e-34	5.06e-30	0.0335158
197 SNr Six3 Gaba	Pou3f1	6.19e-12	1.11e-07	0.0702004
197 SNr Six3 Gaba	Eif3i	2.08e-08	0.00037022	0.0225127
197 SNr Six3 Gaba	Atp5if1	4.55e-11	8.15e-07	0.0168998
197 SNr Six3 Gaba	Nudc	1.63e-06	0.0286941	0.0212944
197 SNr Six3 Gaba	Sh3bgrl3	7.46e-09	0.00013282	0.0253029
197 SNr Six3 Gaba	Stmn1	3.34e-17	6.03e-13	0.0257599
197 SNr Six3 Gaba	Tmem50a	9.72e-12	1.74e-07	0.0238503
197 SNr Six3 Gaba	Rpl11	1.64e-25	2.97e-21	0.0260824
197 SNr Six3 Gaba	Ddost	6.46e-09	0.00011495	0.0278844
197 SNr Six3 Gaba	Mul1	7.41e-07	0.013065	0.0276983
197 SNr Six3 Gaba	Micos10	1.25e-10	2.23e-06	0.0204485
197 SNr Six3 Gaba	Sdhb	4.28e-10	7.65e-06	0.0177172
197 SNr Six3 Gaba	Fbxo2	1.62e-09	2.89e-05	0.0374812
197 SNr Six3 Gaba	Park7	4.04e-19	7.33e-15	0.0331184
197 SNr Six3 Gaba	Acot7	1.33e-12	2.39e-08	0.0187113
197 SNr Six3 Gaba	BC039966	7.35e-10	1.31e-05	0.0445714
197 SNr Six3 Gaba	Ssu72	1.24e-08	0.00022053	0.020744
197 SNr Six3 Gaba	Mrpl20	8.04e-12	1.44e-07	0.0305138
197 SNr Six3 Gaba	Aurkaip1	1.14e-12	2.05e-08	0.0338422
197 SNr Six3 Gaba	Tomm7	4.67e-10	8.34e-06	0.0310379
197 SNr Six3 Gaba	Nicol1	9.88e-11	1.77e-06	0.0199378
197 SNr Six3 Gaba	Mrfap1	1.87e-09	3.34e-05	0.020422
197 SNr Six3 Gaba	Nsg1	2.91e-09	5.18e-05	0.0145629
197 SNr Six3 Gaba	Rpl9	3.12e-53	5.7e-49	0.0392108
197 SNr Six3 Gaba	Uchl1	8.49e-19	1.54e-14	0.0211367
197 SNr Six3 Gaba	Tmem33	1.22e-06	0.0214432	0.020312
197 SNr Six3 Gaba	Gabra2	5.62e-07	0.00990261	0.0126494
197 SNr Six3 Gaba	Ociad1	1.95e-16	3.52e-12	0.0197277
197 SNr Six3 Gaba	Utp3	4.97e-10	8.89e-06	0.0403715
197 SNr Six3 Gaba	Sparcl1	1.64e-06	0.0288574	0.0149149
197 SNr Six3 Gaba	Spp1	7.41e-20	1.34e-15	0.0889044
197 SNr Six3 Gaba	Rpl5	8.24e-23	1.5e-18	0.0284265
197 SNr Six3 Gaba	Atp5me	4.85e-15	8.75e-11	0.0293496
197 SNr Six3 Gaba	Iscu	1.13e-14	2.04e-10	0.0225026
197 SNr Six3 Gaba	2210016L21Rik	4.52e-07	0.00796896	0.0201487
197 SNr Six3 Gaba	Pop5	2.53e-11	4.54e-07	0.0310114
197 SNr Six3 Gaba	Dynll1	1.21e-18	2.2e-14	0.0301892
197 SNr Six3 Gaba	Cox6a1	3.61e-14	6.51e-10	0.0181763
197 SNr Six3 Gaba	Rplp0	1.08e-13	1.94e-09	0.0298226
197 SNr Six3 Gaba	Pebp1	1.7e-28	3.09e-24	0.0329085
197 SNr Six3 Gaba	Rpl6	2.85e-46	5.21e-42	0.0331982
197 SNr Six3 Gaba	Erp29	1.8e-06	0.0316653	0.0147628
197 SNr Six3 Gaba	Vps29	1.67e-08	0.0002976	0.0202473
197 SNr Six3 Gaba	Arpc3	5.36e-09	9.55e-05	0.0245033
197 SNr Six3 Gaba	AI480526	6.1e-07	0.0107548	-0.0205816
197 SNr Six3 Gaba	Arl6ip4	4.6e-07	0.00812086	0.0283646
197 SNr Six3 Gaba	Ubc	6.25e-36	1.14e-31	0.034366
197 SNr Six3 Gaba	Ran	9.38e-23	1.7e-18	0.0364082
197 SNr Six3 Gaba	Chchd2	2.39e-39	4.36e-35	0.0347615
197 SNr Six3 Gaba	Auts2	7.6e-07	0.0133933	-0.0155078
197 SNr Six3 Gaba	Mdh2	3.1e-21	5.62e-17	0.027668
197 SNr Six3 Gaba	Cux1	1.45e-07	0.00256943	-0.015188
197 SNr Six3 Gaba	Fis1	1.37e-11	2.46e-07	0.0242273
197 SNr Six3 Gaba	Pop7	2.79e-07	0.00493174	0.0352829
197 SNr Six3 Gaba	Tsc22d4	8.96e-08	0.00158686	0.0257079
197 SNr Six3 Gaba	Cops6	1.33e-09	2.37e-05	0.0262284
197 SNr Six3 Gaba	Rac1	9.06e-12	1.63e-07	0.0244181
197 SNr Six3 Gaba	Atp5mf	2.32e-10	4.14e-06	0.0176833
197 SNr Six3 Gaba	Rpl21	7.4e-44	1.35e-39	0.0353073
197 SNr Six3 Gaba	Polr1d	4.19e-08	0.00074266	0.0268313
197 SNr Six3 Gaba	Pan3	5.86e-07	0.0103333	-0.0117492
197 SNr Six3 Gaba	Pomp	5.23e-22	9.49e-18	0.0374558
197 SNr Six3 Gaba	Gng11	5.08e-07	0.00896548	0.0374777
197 SNr Six3 Gaba	Pon2	3.97e-08	0.00070422	0.0587838
197 SNr Six3 Gaba	Sem1	2.05e-11	3.67e-07	0.024297
197 SNr Six3 Gaba	Asns	6.51e-13	1.17e-08	0.038811
197 SNr Six3 Gaba	Coxfa4	6.69e-48	1.22e-43	0.0343345
197 SNr Six3 Gaba	Ndufa5	2.5e-17	4.53e-13	0.0283294
197 SNr Six3 Gaba	Atp6v1f	1.14e-14	2.05e-10	0.0249817
197 SNr Six3 Gaba	Nrf1	2.49e-09	4.44e-05	-0.0203662
197 SNr Six3 Gaba	Mrps33	6.97e-08	0.00123579	0.0227452
197 SNr Six3 Gaba	Atp6v0e2	2.89e-07	0.00510646	0.0177927
197 SNr Six3 Gaba	Cycs	3.52e-23	6.39e-19	0.0371245
197 SNr Six3 Gaba	Nap1l5	9.11e-11	1.63e-06	0.0118207
197 SNr Six3 Gaba	A530053G22Rik	2.11e-11	3.78e-07	0.134538
197 SNr Six3 Gaba	Tmsb10	7.32e-10	1.31e-05	0.0184968
197 SNr Six3 Gaba	Suclg1	1.93e-15	3.48e-11	0.0266158
197 SNr Six3 Gaba	Mrpl53	1.57e-07	0.00278383	0.0262819
197 SNr Six3 Gaba	Cct7	3e-28	5.46e-24	0.0411654
197 SNr Six3 Gaba	Pcbp1	1.27e-10	2.28e-06	0.0287735
197 SNr Six3 Gaba	Cnbp	4.38e-09	7.81e-05	0.0225239
197 SNr Six3 Gaba	Rab7	3.51e-07	0.00619739	0.0186382
197 SNr Six3 Gaba	Podxl2	4.57e-07	0.00805744	0.012257
197 SNr Six3 Gaba	Mrps25	4.64e-07	0.00819399	0.0293564
197 SNr Six3 Gaba	Arl8b	2.77e-07	0.00490142	0.0181652
197 SNr Six3 Gaba	Brk1	8.26e-07	0.0145431	0.0173332
197 SNr Six3 Gaba	Rpl32	6.58e-47	1.2e-42	0.0392264
197 SNr Six3 Gaba	Adipor2	1.04e-13	1.88e-09	0.0327857
197 SNr Six3 Gaba	Atp6v1e1	2.7e-18	4.89e-14	0.0258506
197 SNr Six3 Gaba	Grcc10	9.76e-17	1.77e-12	0.0266315
197 SNr Six3 Gaba	Tpi1	6.09e-20	1.1e-15	0.0248184
197 SNr Six3 Gaba	Gpr162	3.3e-13	5.94e-09	-0.0294075
197 SNr Six3 Gaba	Mlf2	1.25e-10	2.23e-06	0.0240699
197 SNr Six3 Gaba	Gapdh	3.71e-43	6.77e-39	0.0323537
197 SNr Six3 Gaba	Vamp1	9.44e-18	1.71e-13	0.03035
197 SNr Six3 Gaba	Fkbp4	1.7e-06	0.0298628	0.0227622
197 SNr Six3 Gaba	Gabarapl1	2.13e-10	3.81e-06	0.0204822
197 SNr Six3 Gaba	Smim10l1	3.92e-10	7.01e-06	0.0258329
197 SNr Six3 Gaba	Grin2b	1.22e-08	0.00021651	-0.0092825
197 SNr Six3 Gaba	Ldhb	5.45e-29	9.91e-25	0.0309399
197 SNr Six3 Gaba	Kras	6.83e-09	0.0001215	0.0219952
197 SNr Six3 Gaba	Ndufa3	2.43e-07	0.00430294	0.0181747
197 SNr Six3 Gaba	Rps9	4.89e-49	8.95e-45	0.0451332
197 SNr Six3 Gaba	Leng9	2.69e-11	4.82e-07	-0.0366646
197 SNr Six3 Gaba	Rpl28	2.49e-36	4.54e-32	0.0331281
197 SNr Six3 Gaba	Ube2s	8.41e-09	0.00014954	0.0221658
197 SNr Six3 Gaba	Rps5	4.52e-48	8.25e-44	0.0404972
197 SNr Six3 Gaba	Chmp2a	1.37e-07	0.00242779	0.0266644
197 SNr Six3 Gaba	Ube2m	3.24e-08	0.00057441	0.0223062
197 SNr Six3 Gaba	Selenow	3.8e-30	6.91e-26	0.0375396
197 SNr Six3 Gaba	Nop53	1.82e-09	3.25e-05	0.0362943
197 SNr Six3 Gaba	Tmem160	2.59e-08	0.00045971	0.030115
197 SNr Six3 Gaba	Npas1	1.37e-06	0.0241021	0.0336975
197 SNr Six3 Gaba	Ap2s1	2.02e-11	3.63e-07	0.0259799
197 SNr Six3 Gaba	Calm3	2.03e-12	3.66e-08	0.022587
197 SNr Six3 Gaba	Snrpd2	1.17e-09	2.09e-05	0.0256851
197 SNr Six3 Gaba	Apoe	2.7e-26	4.9e-22	0.0467176
197 SNr Six3 Gaba	Rps19	5.71e-49	1.04e-44	0.0442266
197 SNr Six3 Gaba	Rabac1	1.69e-30	3.08e-26	0.0248346
197 SNr Six3 Gaba	Pafah1b3	1.84e-16	3.32e-12	0.0573661
197 SNr Six3 Gaba	Rab4b	6.58e-12	1.18e-07	0.0297187
197 SNr Six3 Gaba	Psmc4	1.16e-09	2.06e-05	0.031845
197 SNr Six3 Gaba	Rps16	3.49e-43	6.37e-39	0.038059
197 SNr Six3 Gaba	Mrps12	1.04e-12	1.88e-08	0.0300933
197 SNr Six3 Gaba	Eif3k	1.16e-21	2.11e-17	0.0355168
197 SNr Six3 Gaba	Yif1b	1.42e-06	0.0249519	0.0200431
197 SNr Six3 Gaba	Ppp1r14a	9.46e-07	0.0166601	0.0288985
197 SNr Six3 Gaba	Capns1	7.59e-07	0.0133711	0.0249386
197 SNr Six3 Gaba	Tbcb	6.25e-11	1.12e-06	0.024295
197 SNr Six3 Gaba	Aplp1	8.04e-09	0.000143	0.0170132
197 SNr Six3 Gaba	Psenen	3.99e-12	7.18e-08	0.0261009
197 SNr Six3 Gaba	Cox6b1	7.73e-26	1.4e-21	0.0268955
197 SNr Six3 Gaba	Tmem147	1.63e-16	2.94e-12	0.0241271
197 SNr Six3 Gaba	Tshz3	1.04e-11	1.86e-07	0.037872
197 SNr Six3 Gaba	Emc10	1.87e-08	0.00033305	0.0167082
197 SNr Six3 Gaba	Prmt1	8.21e-08	0.00145458	0.0247887
197 SNr Six3 Gaba	Rps11	6.37e-38	1.16e-33	0.0357215
197 SNr Six3 Gaba	Rpl13a	2.03e-50	3.7e-46	0.0415926
197 SNr Six3 Gaba	Snrnp70	3.02e-10	5.4e-06	-0.0121606
197 SNr Six3 Gaba	Ftl1	2.49e-15	4.49e-11	0.0336775
197 SNr Six3 Gaba	Rpl18	9.45e-46	1.73e-41	0.0408586
197 SNr Six3 Gaba	Ube3a	3.12e-14	5.62e-10	-0.0108014
197 SNr Six3 Gaba	Klf13	1.32e-06	0.0231782	0.0218312
197 SNr Six3 Gaba	Entrep2	4.6e-08	0.00081646	-0.0152479
197 SNr Six3 Gaba	Nsmce3	2.81e-09	5.01e-05	0.031238
197 SNr Six3 Gaba	Tm2d3	4.56e-28	8.29e-24	0.0327592
197 SNr Six3 Gaba	Selenos	2.13e-07	0.00377422	0.0248849
197 SNr Six3 Gaba	Mrpl46	8.71e-07	0.0153393	0.0318102
197 SNr Six3 Gaba	Unc45a	4.17e-07	0.00735972	-0.0328373
197 SNr Six3 Gaba	Rps17	3.99e-18	7.23e-14	0.0283252
197 SNr Six3 Gaba	Ndufc2	7.93e-49	1.45e-44	0.0385046
197 SNr Six3 Gaba	Rps3	2.61e-54	4.78e-50	0.0433701
197 SNr Six3 Gaba	Spcs2	3.1e-09	5.52e-05	0.0209309
197 SNr Six3 Gaba	Rab6a	1.86e-06	0.0327329	0.0123892
197 SNr Six3 Gaba	Rhog	3.42e-15	6.18e-11	0.0542798
197 SNr Six3 Gaba	Trim30a	6.04e-09	0.00010756	-0.106387
197 SNr Six3 Gaba	Timm10b	1.51e-06	0.0265074	0.0185649
197 SNr Six3 Gaba	Mrpl17	9.68e-08	0.00171444	0.0273203
197 SNr Six3 Gaba	Eif3f	5.83e-12	1.05e-07	0.0277456
197 SNr Six3 Gaba	Rpl27a	2.5e-32	4.56e-28	0.0293483
197 SNr Six3 Gaba	Far1	6.33e-07	0.0111599	-0.0131014
197 SNr Six3 Gaba	Rps13	1.04e-36	1.89e-32	0.0359858
197 SNr Six3 Gaba	Rps15a	2.71e-21	4.92e-17	0.0311782
197 SNr Six3 Gaba	Arl6ip1	1.56e-14	2.82e-10	0.0190535
197 SNr Six3 Gaba	Uqcrc2	4.15e-07	0.00733172	0.0154298
197 SNr Six3 Gaba	Ndufab1	7e-17	1.27e-12	0.0251129
197 SNr Six3 Gaba	Eif3c	2.8e-12	5.03e-08	0.0296875
197 SNr Six3 Gaba	Coro1a	7.6e-07	0.0133907	0.036104
197 SNr Six3 Gaba	Aldoa	6.66e-39	1.22e-34	0.0324135
197 SNr Six3 Gaba	Kctd13	8.66e-15	1.56e-10	0.0395749
197 SNr Six3 Gaba	Sez6l2	1.85e-07	0.00326355	0.0149367
197 SNr Six3 Gaba	Htra1	4.48e-18	8.12e-14	0.0770499
197 SNr Six3 Gaba	Bnip3	3.29e-10	5.88e-06	0.0339802
197 SNr Six3 Gaba	Caly	4.58e-12	8.22e-08	0.0185688
197 SNr Six3 Gaba	Hras	1.13e-12	2.03e-08	0.0284945
197 SNr Six3 Gaba	Cend1	2.79e-08	0.00049585	0.0170512
197 SNr Six3 Gaba	Rplp2	6.19e-25	1.12e-20	0.0313704
197 SNr Six3 Gaba	Ctsd	9.94e-14	1.79e-09	0.0276853
197 SNr Six3 Gaba	Mrpl23	2.16e-10	3.87e-06	0.0289458
197 SNr Six3 Gaba	Cd81	2.14e-08	0.00037929	0.0149108
197 SNr Six3 Gaba	Trappc5	3.51e-15	6.34e-11	0.0483377
197 SNr Six3 Gaba	Lamp1	4.01e-12	7.2e-08	0.0207802
197 SNr Six3 Gaba	Coprs	5.2e-09	9.26e-05	0.029568
197 SNr Six3 Gaba	Vdac3	7.55e-11	1.35e-06	0.0218125
197 SNr Six3 Gaba	Polb	1.46e-08	0.00025994	-0.0127926
197 SNr Six3 Gaba	Smim18	6.65e-17	1.2e-12	0.0464492
197 SNr Six3 Gaba	Slc25a4	1.74e-42	3.18e-38	0.0335885
197 SNr Six3 Gaba	Marchf1	2.25e-09	4.02e-05	-0.0199756
197 SNr Six3 Gaba	Yjefn3	1.74e-13	3.14e-09	0.0697284
197 SNr Six3 Gaba	Ndufa13	1.2e-37	2.18e-33	0.0347286
197 SNr Six3 Gaba	Cope	1.54e-18	2.79e-14	0.0339351
197 SNr Six3 Gaba	Tmem59l	7.66e-19	1.39e-14	0.0196894
197 SNr Six3 Gaba	Rex1bd	4.44e-10	7.94e-06	0.0317385
197 SNr Six3 Gaba	Rab3a	4.06e-28	7.38e-24	0.0301502
197 SNr Six3 Gaba	Ccdc124	3.64e-10	6.5e-06	0.0311508
197 SNr Six3 Gaba	Rpl18a	6.13e-41	1.12e-36	0.0369062
197 SNr Six3 Gaba	Use1	1.54e-07	0.00272434	0.0258477
197 SNr Six3 Gaba	Scoc	7.68e-07	0.0135236	0.0187298
197 SNr Six3 Gaba	Ndufb7	1.8e-19	3.26e-15	0.031784
197 SNr Six3 Gaba	Tecr	6.3e-32	1.15e-27	0.0207221
197 SNr Six3 Gaba	D8Ertd738e	7.49e-09	0.00013325	0.029189
197 SNr Six3 Gaba	Gadd45gip1	1.79e-07	0.00315802	0.0272899
197 SNr Six3 Gaba	Wdr83os	2.13e-14	3.84e-10	0.0396893
197 SNr Six3 Gaba	Mt1	9.59e-16	1.73e-11	0.0329254
197 SNr Six3 Gaba	Tppp3	5.41e-13	9.74e-09	0.0463277
197 SNr Six3 Gaba	Psmd7	7.25e-09	0.00012902	0.0196343
197 SNr Six3 Gaba	Gabarapl2	1.32e-19	2.39e-15	0.0287526
197 SNr Six3 Gaba	Cox4i1	2.94e-51	5.38e-47	0.0319273
197 SNr Six3 Gaba	Map1lc3b	1.05e-12	1.89e-08	0.027711
197 SNr Six3 Gaba	Trappc2l	6e-07	0.0105816	0.0221636
197 SNr Six3 Gaba	Rpl13	1.54e-53	2.83e-49	0.0348849
197 SNr Six3 Gaba	Tubb3	2.25e-07	0.00397336	0.0142416
197 SNr Six3 Gaba	Coa6	4.43e-11	7.94e-07	0.0468401
197 SNr Six3 Gaba	Tomm20	5.48e-16	9.9e-12	0.0254511
197 SNr Six3 Gaba	Gm32014	2.38e-12	4.28e-08	-0.0410966
197 SNr Six3 Gaba	Endod1	1.13e-06	0.0199651	0.017887
197 SNr Six3 Gaba	Eif3g	2.84e-09	5.07e-05	0.0349557
197 SNr Six3 Gaba	Cdc37	2.94e-07	0.00518815	0.0269431
197 SNr Six3 Gaba	Cdkn2d	1.66e-08	0.00029556	0.0321861
197 SNr Six3 Gaba	Pigyl	3.26e-25	5.92e-21	0.0486183
197 SNr Six3 Gaba	Anln	2.18e-06	0.038325	0.0360369
197 SNr Six3 Gaba	Aplp2	2.61e-06	0.0457849	0.009781
197 SNr Six3 Gaba	Hspa8	1.1e-67	2.01e-63	0.0394024
197 SNr Six3 Gaba	Thy1	1.41e-11	2.53e-07	0.0165153
197 SNr Six3 Gaba	Trappc4	3.09e-07	0.00546143	0.0221719
197 SNr Six3 Gaba	Rps25	8.67e-39	1.58e-34	0.0369521
197 SNr Six3 Gaba	Atp5mg	2.95e-16	5.32e-12	0.0232117
197 SNr Six3 Gaba	Timm8b	1.19e-11	2.14e-07	0.0279112
197 SNr Six3 Gaba	Cryab	3.6e-19	6.53e-15	0.0420508
197 SNr Six3 Gaba	Imp3	1.24e-06	0.0217403	0.024692
197 SNr Six3 Gaba	Cox5a	6.36e-40	1.16e-35	0.0324633
197 SNr Six3 Gaba	Pkm	8.57e-33	1.56e-28	0.0318819
197 SNr Six3 Gaba	Rplp1	9.64e-68	1.77e-63	0.0397134
197 SNr Six3 Gaba	Rpl4	4.83e-25	8.78e-21	0.0341408
197 SNr Six3 Gaba	Eef1a1	2.56e-25	4.65e-21	0.0248984
197 SNr Six3 Gaba	Cox7a2	4.48e-26	8.14e-22	0.0295563
197 SNr Six3 Gaba	Rwdd2a	6.36e-10	1.14e-05	0.0374198
197 SNr Six3 Gaba	Xrn1	1.42e-06	0.0248849	-0.0115344
197 SNr Six3 Gaba	Trf	1.61e-07	0.00285611	0.0240266
197 SNr Six3 Gaba	Rpl29	4.93e-12	8.85e-08	0.0203925
197 SNr Six3 Gaba	Ndufaf3	1.49e-07	0.00263201	0.0295168
197 SNr Six3 Gaba	Uqcrc1	1.29e-15	2.33e-11	0.0246195
197 SNr Six3 Gaba	Rpsa	1.8e-57	3.29e-53	0.039422
197 SNr Six3 Gaba	Eif1b	4.76e-15	8.59e-11	0.0312501
197 SNr Six3 Gaba	Rpl14	8.8e-65	1.61e-60	0.0478092
197 SNr Six3 Gaba	Higd1a	6.66e-12	1.19e-07	0.0266187
197 SNr Six3 Gaba	Sf3b5	9.86e-09	0.0001754	0.0319849
197 SNr Six3 Gaba	Sgk1	1.88e-24	3.42e-20	0.0358194
197 SNr Six3 Gaba	Rps12	4.86e-37	8.87e-33	0.0390345
197 SNr Six3 Gaba	Tspyl4	1.4e-12	2.52e-08	0.0226788
197 SNr Six3 Gaba	Snx3	1.42e-06	0.0249276	0.0158809
197 SNr Six3 Gaba	Serinc1	2.62e-07	0.00463597	0.011443
197 SNr Six3 Gaba	Ppa1	2.31e-06	0.0405988	0.0197457
197 SNr Six3 Gaba	Ctnna3	6.55e-08	0.00116086	-0.0134487
197 SNr Six3 Gaba	Ank3	1.09e-09	1.95e-05	-0.0078088
197 SNr Six3 Gaba	Cisd1	9.13e-20	1.66e-15	0.0274585
197 SNr Six3 Gaba	Zwint	1.98e-10	3.54e-06	0.0131259
197 SNr Six3 Gaba	Snrpd3	9.41e-08	0.00166621	0.0288516
197 SNr Six3 Gaba	Ddt	3.68e-20	6.68e-16	0.0471454
197 SNr Six3 Gaba	Mif	6.18e-38	1.13e-33	0.035805
197 SNr Six3 Gaba	Chchd10	7.53e-40	1.37e-35	0.0350002
197 SNr Six3 Gaba	Sumo3	2.4e-08	0.0004265	0.0347855
197 SNr Six3 Gaba	Rrp1	4.45e-17	8.04e-13	0.0322219
197 SNr Six3 Gaba	Cstb	9.18e-12	1.65e-07	0.0366132
197 SNr Six3 Gaba	Tpgs1	9.59e-08	0.00169939	0.0276363
197 SNr Six3 Gaba	Bsg	1.08e-19	1.96e-15	0.022388
197 SNr Six3 Gaba	Polr2e	1.76e-08	0.00031241	0.0357877
197 SNr Six3 Gaba	Gpx4	1.24e-33	2.27e-29	0.0324008
197 SNr Six3 Gaba	Atp5f1d	1.68e-08	0.00029781	0.016811
197 SNr Six3 Gaba	Ndufs7	4.84e-47	8.85e-43	0.0430927
197 SNr Six3 Gaba	Rps15	1.12e-34	2.04e-30	0.0299955
197 SNr Six3 Gaba	Uqcr11	7.61e-10	1.36e-05	0.0239997
197 SNr Six3 Gaba	Oaz1	5.02e-26	9.13e-22	0.0308942
197 SNr Six3 Gaba	Lsm7	1.63e-06	0.0286265	0.0198236
197 SNr Six3 Gaba	Timm13	3.11e-16	5.61e-12	0.0351667
197 SNr Six3 Gaba	Eef2	2.1e-08	0.00037325	0.0199544
197 SNr Six3 Gaba	Hsp90b1	4.55e-22	8.27e-18	0.027883
197 SNr Six3 Gaba	Scyl2	1.65e-07	0.00291888	-0.0258759
197 SNr Six3 Gaba	Slc25a3	1.31e-10	2.34e-06	0.0120751
197 SNr Six3 Gaba	Ndufa12	5.89e-17	1.07e-12	0.0247418
197 SNr Six3 Gaba	Mrpl42	9.8e-15	1.77e-10	0.0301742
197 SNr Six3 Gaba	Nts	2.81e-13	5.06e-09	0.109975
197 SNr Six3 Gaba	Atxn7l3b	3.41e-07	0.00601779	0.0169381
197 SNr Six3 Gaba	Cct2	2.09e-08	0.00037082	0.0253432
197 SNr Six3 Gaba	Tmbim4	6.08e-08	0.00107798	0.0207526
197 SNr Six3 Gaba	Llph	1.17e-09	2.09e-05	0.0381445
197 SNr Six3 Gaba	R3hdm2	1.19e-08	0.00021218	-0.0129099
197 SNr Six3 Gaba	Tac2	2.26e-08	0.0004013	0.0794508
197 SNr Six3 Gaba	Naca	3.34e-30	6.09e-26	0.0353791
197 SNr Six3 Gaba	Atp5f1b	3.53e-27	6.42e-23	0.0240381
197 SNr Six3 Gaba	Cnpy2	1.21e-10	2.16e-06	0.0287545
197 SNr Six3 Gaba	Nabp2	1.22e-07	0.0021537	0.028681
197 SNr Six3 Gaba	Myl6	1.04e-18	1.88e-14	0.0262194
197 SNr Six3 Gaba	Rpl41	6.04e-11	1.08e-06	0.0167704
197 SNr Six3 Gaba	Rps26	1.06e-33	1.93e-29	0.0359954
197 SNr Six3 Gaba	Cd63	5.57e-12	1e-07	0.0425545
197 SNr Six3 Gaba	Selenom	2.07e-47	3.79e-43	0.0391579
197 SNr Six3 Gaba	Ascc2	1.72e-06	0.0302487	-0.023256
197 SNr Six3 Gaba	Uqcr10	1.72e-18	3.12e-14	0.0273533
197 SNr Six3 Gaba	Nefh	7.45e-10	1.33e-05	0.0425109
197 SNr Six3 Gaba	Xbp1	6.6e-08	0.00116898	0.023211
197 SNr Six3 Gaba	Ppia	1.77e-44	3.24e-40	0.0312154
197 SNr Six3 Gaba	Mdh1	1.96e-56	3.59e-52	0.0358248
197 SNr Six3 Gaba	Ehbp1	6.05e-07	0.0106589	-0.0091799
197 SNr Six3 Gaba	Bcl11a	2.74e-06	0.0481046	-0.0297606
197 SNr Six3 Gaba	Rps27a	1.03e-59	1.88e-55	0.0440213
197 SNr Six3 Gaba	Npm1	8.88e-21	1.61e-16	0.0341866
197 SNr Six3 Gaba	Gabra1	9.82e-17	1.77e-12	0.0190897
197 SNr Six3 Gaba	Pttg1	2.78e-07	0.00490396	0.0282253
197 SNr Six3 Gaba	Rack1	1.4e-17	2.53e-13	0.0286335
197 SNr Six3 Gaba	Sar1b	2.66e-08	0.00047182	0.0205472
197 SNr Six3 Gaba	Skp1	5.02e-20	9.1e-16	0.0326885
197 SNr Six3 Gaba	Uqcrq	1.95e-15	3.52e-11	0.0220113
197 SNr Six3 Gaba	Hint1	1.75e-47	3.19e-43	0.0390918
197 SNr Six3 Gaba	Guk1	2.04e-06	0.0357638	0.0208259
197 SNr Six3 Gaba	Mrpl55	7.48e-09	0.00013319	0.0299807
197 SNr Six3 Gaba	Snap47	4.75e-09	8.46e-05	0.0182122
197 SNr Six3 Gaba	Ubb	1.37e-62	2.51e-58	0.0360024
197 SNr Six3 Gaba	Rpl26	1.21e-56	2.21e-52	0.0428331
197 SNr Six3 Gaba	Rnf227	1.74e-12	3.13e-08	0.0216303
197 SNr Six3 Gaba	Naa38	1.08e-09	1.92e-05	0.0336051
197 SNr Six3 Gaba	Eif5a	6.93e-10	1.24e-05	0.0241695
197 SNr Six3 Gaba	Gabarap	1.99e-16	3.59e-12	0.0315077
197 SNr Six3 Gaba	Rnasek	3.56e-08	0.00063161	0.0130112
197 SNr Six3 Gaba	Psmb6	6.66e-32	1.21e-27	0.0431031
197 SNr Six3 Gaba	Slc25a11	9.2e-09	0.00016358	0.0300275
197 SNr Six3 Gaba	Pfn1	4.9e-16	8.86e-12	0.0339059
197 SNr Six3 Gaba	Rpl23a	7.65e-29	1.39e-24	0.0285415
197 SNr Six3 Gaba	Aldoc	7.24e-19	1.31e-14	0.0276112
197 SNr Six3 Gaba	Ccnq	6.98e-07	0.0123099	0.040627
197 SNr Six3 Gaba	Wsb1	3.33e-17	6.02e-13	-0.0207574
197 SNr Six3 Gaba	Omg	3.17e-10	5.66e-06	0.0276385
197 SNr Six3 Gaba	Gm12576	1.9e-06	0.0333245	0.090105
197 SNr Six3 Gaba	Bcas3	1.61e-07	0.00284384	-0.0116256
197 SNr Six3 Gaba	Dynll2	1.19e-11	2.14e-07	0.0229342
197 SNr Six3 Gaba	Nme2	1.88e-27	3.42e-23	0.039153
197 SNr Six3 Gaba	Nme1	1.44e-38	2.64e-34	0.041406
197 SNr Six3 Gaba	Atp5mc1	4.13e-16	7.46e-12	0.0218854
197 SNr Six3 Gaba	Psmb3	1.37e-11	2.46e-07	0.0260384
197 SNr Six3 Gaba	Rpl23	1.19e-56	2.18e-52	0.0462061
197 SNr Six3 Gaba	Rpl19	4.32e-75	7.91e-71	0.0443795
197 SNr Six3 Gaba	Mien1	4.86e-08	0.00086114	0.0300166
197 SNr Six3 Gaba	Eif1	1.06e-26	1.92e-22	0.0291255
197 SNr Six3 Gaba	Coa3	8.14e-21	1.48e-16	0.0381849
197 SNr Six3 Gaba	Aarsd1	8.29e-09	0.00014744	0.02627
197 SNr Six3 Gaba	Rpl27	4.37e-41	7.97e-37	0.0405888
197 SNr Six3 Gaba	Arl4d	3.86e-11	6.91e-07	0.0840113
197 SNr Six3 Gaba	Psmc5	2.06e-15	3.71e-11	0.0296501
197 SNr Six3 Gaba	Ddx5	1.34e-07	0.00236562	-0.0109647
197 SNr Six3 Gaba	Psmd12	3.76e-08	0.00066766	0.0230707
197 SNr Six3 Gaba	Prkar1a	3.21e-09	5.72e-05	0.0173349
197 SNr Six3 Gaba	Abca8a	1.52e-19	2.76e-15	0.0781894
197 SNr Six3 Gaba	Rpl38	1.11e-26	2.03e-22	0.0314654
197 SNr Six3 Gaba	Atp5pd	2.45e-43	4.48e-39	0.0359999
197 SNr Six3 Gaba	Sumo2	3.86e-07	0.00681048	0.0178627
197 SNr Six3 Gaba	Mrpl12	3.27e-14	5.89e-10	0.0376565
197 SNr Six3 Gaba	Fn3k	7.65e-12	1.37e-07	0.0315722
197 SNr Six3 Gaba	Sf3b6	6.3e-16	1.14e-11	0.0297884
197 SNr Six3 Gaba	Laptm4a	5.32e-11	9.53e-07	0.0213408
197 SNr Six3 Gaba	Vsnl1	8.18e-11	1.46e-06	0.013309
197 SNr Six3 Gaba	Ywhaq	1.13e-10	2.03e-06	0.0185077
197 SNr Six3 Gaba	Rps7	1.36e-49	2.48e-45	0.041973
197 SNr Six3 Gaba	Psma6	3.25e-13	5.86e-09	0.0270125
197 SNr Six3 Gaba	Nfkbia	1.32e-11	2.36e-07	0.0545068
197 SNr Six3 Gaba	Fkbp3	9.36e-27	1.7e-22	0.0289858
197 SNr Six3 Gaba	Rps29	2.28e-31	4.16e-27	0.0334682
197 SNr Six3 Gaba	Rpl36al	8.52e-30	1.55e-25	0.0381445
197 SNr Six3 Gaba	Jkamp	2.56e-07	0.00451961	0.0165021
197 SNr Six3 Gaba	Rtn1	3.74e-32	6.81e-28	0.01871
197 SNr Six3 Gaba	Atp6v1d	9.69e-10	1.73e-05	0.0181936
197 SNr Six3 Gaba	Psmc1	8.24e-09	0.00014657	0.0219825
197 SNr Six3 Gaba	Calm1	1.37e-41	2.51e-37	0.0271057
197 SNr Six3 Gaba	Ndufb1	1.8e-11	3.23e-07	0.0254844
197 SNr Six3 Gaba	Lgmn	4.75e-07	0.00838157	0.0160996
197 SNr Six3 Gaba	Chga	5.13e-17	9.27e-13	0.0222853
197 SNr Six3 Gaba	Ddx24	5.71e-10	1.02e-05	0.0152014
197 SNr Six3 Gaba	Ifi27	6.82e-08	0.00120807	0.0556127
197 SNr Six3 Gaba	Glrx5	3.88e-07	0.00684445	0.0245105
197 SNr Six3 Gaba	Dlk1	5.19e-08	0.0009195	0.0283892
197 SNr Six3 Gaba	Meg3	7.01e-13	1.26e-08	-0.0056675
197 SNr Six3 Gaba	Rian	3.93e-07	0.00694267	-0.0062481
197 SNr Six3 Gaba	Hsp90aa1	6.2e-55	1.13e-50	0.0363192
197 SNr Six3 Gaba	Ckb	1.27e-16	2.29e-12	0.0206755
197 SNr Six3 Gaba	Atp5mj	3.92e-21	7.12e-17	0.033109
197 SNr Six3 Gaba	Tmem121	1.49e-06	0.0261456	0.0284095
197 SNr Six3 Gaba	Ighm	7.01e-26	1.27e-21	0.229519
197 SNr Six3 Gaba	Psma2	3.18e-19	5.77e-15	0.0291118
197 SNr Six3 Gaba	9330199G10Rik	7.9e-07	0.0139145	0.0783649
197 SNr Six3 Gaba	H2bc4	1.35e-06	0.0236765	0.0469846
197 SNr Six3 Gaba	Acot13	2.3e-12	4.13e-08	0.0312606
197 SNr Six3 Gaba	Uqcrfs1	3.07e-10	5.48e-06	0.0237099
197 SNr Six3 Gaba	Tubb2a	2.61e-12	4.69e-08	0.0191439
197 SNr Six3 Gaba	Prpf4b	1.94e-06	0.0340005	-0.0094097
197 SNr Six3 Gaba	Tmem14c	3.46e-12	6.21e-08	0.0401462
197 SNr Six3 Gaba	Sncb	2.32e-12	4.17e-08	0.0182755
197 SNr Six3 Gaba	Prelid1	2.13e-07	0.00377059	0.0250994
197 SNr Six3 Gaba	Pdlim7	1.78e-06	0.0312812	-0.0242863
197 SNr Six3 Gaba	Txndc15	2.31e-12	4.15e-08	0.0210561
197 SNr Six3 Gaba	Hnrnpk	1.05e-07	0.0018658	0.0172146
197 SNr Six3 Gaba	Ctsl	4.61e-07	0.00813881	0.0175279
197 SNr Six3 Gaba	Zfp369	2.78e-08	0.00049252	-0.0291787
197 SNr Six3 Gaba	Uqcrb	5.73e-11	1.03e-06	0.0225459
197 SNr Six3 Gaba	Mrpl36	7.09e-10	1.27e-05	0.0361144
197 SNr Six3 Gaba	9330111N05Rik	2.25e-10	4.02e-06	0.0539751
197 SNr Six3 Gaba	Cox7c	1.34e-34	2.45e-30	0.0293837
197 SNr Six3 Gaba	Rps23	1.78e-58	3.26e-54	0.047973
197 SNr Six3 Gaba	Btf3	1.76e-20	3.2e-16	0.034014
197 SNr Six3 Gaba	Mrps36	2.41e-08	0.00042829	0.0274702
197 SNr Six3 Gaba	Tmem267	2.22e-08	0.0003946	0.062619
197 SNr Six3 Gaba	D830030K20Rik	2.5e-16	4.52e-12	0.366157
197 SNr Six3 Gaba	Psmd6	3.91e-09	6.97e-05	0.027132
197 SNr Six3 Gaba	Rpl15	6.15e-26	1.12e-21	0.0300721
197 SNr Six3 Gaba	Nkiras1	1.34e-06	0.0235718	0.0174889
197 SNr Six3 Gaba	Rtraf	3.07e-17	5.56e-13	0.0352234
197 SNr Six3 Gaba	Chchd1	3.56e-09	6.35e-05	0.0302317
197 SNr Six3 Gaba	Vdac2	1.03e-13	1.85e-09	0.0245009
197 SNr Six3 Gaba	Comtd1	3.76e-26	6.84e-22	0.0530467
197 SNr Six3 Gaba	Kcnma1	3e-09	5.34e-05	-0.0091014
197 SNr Six3 Gaba	Rps24	4.27e-61	7.83e-57	0.0439784
197 SNr Six3 Gaba	Selenok	4.77e-26	8.66e-22	0.0314119
197 SNr Six3 Gaba	Tkt	2.81e-21	5.09e-17	0.0341348
197 SNr Six3 Gaba	Spcs1	6.43e-36	1.17e-31	0.0355762
197 SNr Six3 Gaba	Timm23	5.55e-07	0.00978015	0.0172291
197 SNr Six3 Gaba	Gpr137c	5.24e-10	9.37e-06	-0.0172432
197 SNr Six3 Gaba	Psmc6	4.9e-07	0.00863696	0.0139165
197 SNr Six3 Gaba	Dad1	2.94e-18	5.33e-14	0.0263854
197 SNr Six3 Gaba	Gm43305	2.33e-10	4.16e-06	-0.0702614
197 SNr Six3 Gaba	Psmb5	3.18e-26	5.79e-22	0.0382505
197 SNr Six3 Gaba	Cmtm5	3.38e-07	0.00596205	0.0303837
197 SNr Six3 Gaba	Psme1	9.05e-07	0.0159353	0.0349054
197 SNr Six3 Gaba	Emc9	1.98e-08	0.00035103	0.02493
197 SNr Six3 Gaba	Nedd8	5.78e-09	0.0001029	0.0198848
197 SNr Six3 Gaba	Mrpl57	1.2e-06	0.0210635	0.0232166
197 SNr Six3 Gaba	Ctsb	3.05e-17	5.52e-13	0.0184976
197 SNr Six3 Gaba	Stmn4	1.65e-08	0.00029375	0.0211613
197 SNr Six3 Gaba	Nefm	1.18e-06	0.0207195	0.0199712
197 SNr Six3 Gaba	Nefl	2.01e-08	0.00035791	0.0233834
197 SNr Six3 Gaba	Gm16867	4.38e-10	7.83e-06	0.446413
197 SNr Six3 Gaba	Itm2b	3.08e-16	5.56e-12	0.0151557
197 SNr Six3 Gaba	Esd	1.06e-14	1.9e-10	0.0305758
197 SNr Six3 Gaba	Tpt1	2.82e-59	5.16e-55	0.0449879
197 SNr Six3 Gaba	Serp2	4.17e-11	7.48e-07	0.0209665
197 SNr Six3 Gaba	Dnajc15	8.43e-11	1.51e-06	0.0228445
197 SNr Six3 Gaba	Klf12	2.37e-06	0.0415111	-0.0101624
197 SNr Six3 Gaba	Gm10076	1.98e-06	0.0347027	0.0332837
197 SNr Six3 Gaba	Selenop	1.55e-09	2.76e-05	0.0390581
197 SNr Six3 Gaba	Rpl37	6.72e-32	1.22e-27	0.033016
197 SNr Six3 Gaba	Ttc33	5.39e-07	0.00950503	0.0282853
197 SNr Six3 Gaba	Sub1	6.73e-10	1.2e-05	0.0298856
197 SNr Six3 Gaba	Basp1	2.8e-10	5.01e-06	0.0129662
197 SNr Six3 Gaba	Trio	3.78e-08	0.00067007	-0.0106945
197 SNr Six3 Gaba	Cct5	8.58e-10	1.53e-05	0.0248527
197 SNr Six3 Gaba	Rpl30	2.95e-32	5.38e-28	0.0331224
197 SNr Six3 Gaba	Cox6c	1.56e-32	2.85e-28	0.0307705
197 SNr Six3 Gaba	Polr2k	3.5e-08	0.00062153	0.0343649
197 SNr Six3 Gaba	Atp6v1c1	1.42e-10	2.54e-06	0.0230229
197 SNr Six3 Gaba	Eif3h	4.24e-15	7.66e-11	0.0248231
197 SNr Six3 Gaba	Atad2	2.81e-06	0.0492905	0.0355391
197 SNr Six3 Gaba	Ndufb9	2.54e-21	4.61e-17	0.0263308
197 SNr Six3 Gaba	Ndrg1	5.97e-08	0.00105742	0.0397391
197 SNr Six3 Gaba	Them6	1.6e-06	0.0280469	0.0267481
197 SNr Six3 Gaba	Ly6h	8.59e-14	1.55e-09	0.0177023
197 SNr Six3 Gaba	Puf60	1.23e-07	0.00218092	0.0199806
197 SNr Six3 Gaba	Grina	1.03e-19	1.88e-15	0.0214222
197 SNr Six3 Gaba	Cyc1	1e-13	1.8e-09	0.0225937
197 SNr Six3 Gaba	Vps28	5.28e-14	9.51e-10	0.0285571
197 SNr Six3 Gaba	Rpl8	6.88e-42	1.26e-37	0.0356084
197 SNr Six3 Gaba	Eif3d	1.93e-07	0.00340913	0.0363585
197 SNr Six3 Gaba	Pvalb	3.01e-29	5.48e-25	0.0674708
197 SNr Six3 Gaba	Ddx17	2.25e-09	4.01e-05	-0.0131285
197 SNr Six3 Gaba	Tomm22	1.91e-08	0.00033937	0.0262508
197 SNr Six3 Gaba	Rpl3	1.04e-35	1.9e-31	0.034468
197 SNr Six3 Gaba	Pmm1	6.53e-09	0.00011621	0.026049
197 SNr Six3 Gaba	Smdt1	1.78e-10	3.18e-06	0.0241972
197 SNr Six3 Gaba	Ndufa6	2.36e-21	4.29e-17	0.027821
197 SNr Six3 Gaba	Sbf1	8e-13	1.44e-08	-0.0259627
197 SNr Six3 Gaba	Sco2	1.15e-34	2.09e-30	0.0611611
197 SNr Six3 Gaba	Zcrb1	1.52e-06	0.0267357	0.0186133
197 SNr Six3 Gaba	Slc38a2	2.79e-08	0.00049592	0.0163148
197 SNr Six3 Gaba	Tuba1b	2.07e-24	3.76e-20	0.02752
197 SNr Six3 Gaba	Tuba1a	5.87e-07	0.0103432	0.013339
197 SNr Six3 Gaba	Cox14	6.29e-14	1.13e-09	0.0308968
197 SNr Six3 Gaba	Mfsd5	1.75e-09	3.13e-05	0.045074
197 SNr Six3 Gaba	Pfdn5	2.61e-26	4.75e-22	0.0368887
197 SNr Six3 Gaba	Atp5mc2	9.4e-11	1.68e-06	0.019386
197 SNr Six3 Gaba	Pam16	1.22e-24	2.21e-20	0.0423725
197 SNr Six3 Gaba	Ubald1	1.81e-08	0.0003221	0.0325346
197 SNr Six3 Gaba	Ranbp1	2.1e-10	3.76e-06	0.0292453
197 SNr Six3 Gaba	Camk2n2	1.05e-10	1.88e-06	0.0200094
197 SNr Six3 Gaba	Eif4a2	1.49e-17	2.69e-13	0.0218061
197 SNr Six3 Gaba	Lpp	1.93e-08	0.00034313	-0.0168021
197 SNr Six3 Gaba	Apod	5.12e-81	9.38e-77	0.107474
197 SNr Six3 Gaba	Ncbp2as2	1.55e-07	0.00274324	0.0208708
197 SNr Six3 Gaba	Rpl35a	6.39e-31	1.16e-26	0.0316169
197 SNr Six3 Gaba	Slc15a2	9.84e-15	1.77e-10	0.0990702
197 SNr Six3 Gaba	Ndufb4	1.67e-30	3.04e-26	0.0403192
197 SNr Six3 Gaba	Cox17	2.4e-11	4.3e-07	0.032514
197 SNr Six3 Gaba	Adprh	7.21e-22	1.31e-17	0.038184
197 SNr Six3 Gaba	Tagln3	1.63e-10	2.92e-06	0.0206234
197 SNr Six3 Gaba	Rpl24	3.56e-45	6.5e-41	0.035006
197 SNr Six3 Gaba	Mir99ahg	1.73e-06	0.0303324	-0.0074304
197 SNr Six3 Gaba	Atp5pf	3.15e-40	5.76e-36	0.034004
197 SNr Six3 Gaba	Sod1	4.91e-07	0.00866429	0.0168771
197 SNr Six3 Gaba	Atp5po	3.13e-30	5.69e-26	0.0318982
197 SNr Six3 Gaba	Tmem181a	1.64e-14	2.96e-10	-0.027968
197 SNr Six3 Gaba	Mpc1	6.06e-15	1.09e-10	0.018714
197 SNr Six3 Gaba	Mrpl18	7.01e-10	1.25e-05	0.0324131
197 SNr Six3 Gaba	Psmb1	3.2e-32	5.82e-28	0.0352137
197 SNr Six3 Gaba	Ppp2r1a	5.97e-10	1.07e-05	0.0247205
197 SNr Six3 Gaba	Hcfc1r1	2.26e-06	0.0396076	0.0163671
197 SNr Six3 Gaba	Elob	2.35e-23	4.27e-19	0.0286911
197 SNr Six3 Gaba	Atp6v0c	5.44e-34	9.91e-30	0.0229334
197 SNr Six3 Gaba	Pgp	4.42e-07	0.00779905	0.0182468
197 SNr Six3 Gaba	Rps2	7.99e-32	1.46e-27	0.0321733
197 SNr Six3 Gaba	Ndufb10	9.48e-33	1.73e-28	0.037762
197 SNr Six3 Gaba	Hagh	4.51e-07	0.00795533	0.0192733
197 SNr Six3 Gaba	Antkmt	6.23e-18	1.13e-13	0.0232297
197 SNr Six3 Gaba	Stub1	8.98e-09	0.00015979	0.0209349
197 SNr Six3 Gaba	Smim29	1.83e-08	0.00032533	0.0295986
197 SNr Six3 Gaba	Rps10	1.86e-77	3.4e-73	0.0495843
197 SNr Six3 Gaba	Pacsin1	1.18e-07	0.00208157	0.0111752
197 SNr Six3 Gaba	Rpl10a	3.22e-17	5.82e-13	0.0258141
197 SNr Six3 Gaba	Srsf3	1.75e-07	0.00309987	0.0213554
197 SNr Six3 Gaba	Mtch1	2.85e-16	5.15e-12	0.0212838
197 SNr Six3 Gaba	Rps28	3.85e-17	6.97e-13	0.0316145
197 SNr Six3 Gaba	Ndufa7	1.14e-13	2.06e-09	0.0265492
197 SNr Six3 Gaba	Pfdn6	5.13e-15	9.25e-11	0.0397476
197 SNr Six3 Gaba	Rps18	5.53e-19	1e-14	0.0310185
197 SNr Six3 Gaba	Col11a2	3.1e-07	0.0054769	-0.0460473
197 SNr Six3 Gaba	Csnk2b	2.49e-08	0.00044146	0.0257463
197 SNr Six3 Gaba	Atp6v1g2	2.83e-07	0.00499531	0.0180665
197 SNr Six3 Gaba	Tubb5	1.08e-16	1.96e-12	0.0272127
197 SNr Six3 Gaba	Ppp1r11	1.22e-15	2.2e-11	0.0339752
197 SNr Six3 Gaba	Rn18s-rs5	6.01e-27	1.09e-22	0.0192085
197 SNr Six3 Gaba	Hsp90ab1	2.63e-38	4.8e-34	0.0304854
197 SNr Six3 Gaba	Mea1	1.24e-06	0.0217366	0.0261742
197 SNr Six3 Gaba	Tomm6	6.63e-10	1.18e-05	0.0241629
197 SNr Six3 Gaba	Plin4	2.08e-15	3.75e-11	0.218064
197 SNr Six3 Gaba	Mydgf	1.08e-06	0.0190332	0.0311238
197 SNr Six3 Gaba	Ptprs	1.2e-13	2.16e-09	-0.0160054
197 SNr Six3 Gaba	Micos13	3.13e-10	5.59e-06	0.0280383
197 SNr Six3 Gaba	Rpl36	9.29e-29	1.69e-24	0.0330141
197 SNr Six3 Gaba	Ndufa11	3.02e-43	5.53e-39	0.0410555
197 SNr Six3 Gaba	Tubb4a	1.87e-06	0.032781	0.0163999
197 SNr Six3 Gaba	Ndufv2	4.43e-27	8.06e-23	0.0268351
197 SNr Six3 Gaba	Dlgap1	9.96e-08	0.00176359	-0.0087098
197 SNr Six3 Gaba	Myl12b	2.5e-17	4.52e-13	0.0236416
197 SNr Six3 Gaba	Cox7a2l	1.91e-16	3.45e-12	0.0267836
197 SNr Six3 Gaba	Calm2	5.98e-25	1.09e-20	0.019584
197 SNr Six3 Gaba	Gm1976	2.14e-07	0.00377977	-0.0188865
197 SNr Six3 Gaba	Zeb1os1	2.46e-09	4.39e-05	-0.0160235
197 SNr Six3 Gaba	Snrpd1	3.93e-31	7.15e-27	0.0526459
197 SNr Six3 Gaba	Ttr	6.38e-07	0.0112431	-0.0755858
197 SNr Six3 Gaba	Dtna	6.55e-10	1.17e-05	-0.012962
197 SNr Six3 Gaba	Gm49980	9.17e-18	1.66e-13	-0.0548621
197 SNr Six3 Gaba	Syt4	3.34e-08	0.00059306	0.0158246
197 SNr Six3 Gaba	Pfdn1	2.77e-07	0.00489552	0.0175514
197 SNr Six3 Gaba	Ndufa2	9.44e-11	1.69e-06	0.0257101
197 SNr Six3 Gaba	Pcdhb9	2.61e-08	0.00046406	0.0744216
197 SNr Six3 Gaba	3222401L13Rik	4.74e-14	8.55e-10	0.0641013
197 SNr Six3 Gaba	Ndfip1	4.88e-26	8.88e-22	0.0170938
197 SNr Six3 Gaba	Rps14	2.51e-37	4.58e-33	0.035281
197 SNr Six3 Gaba	Camk2a	3.45e-07	0.00609475	-0.0195849
197 SNr Six3 Gaba	Sec11c	1.36e-21	2.47e-17	0.0350372
197 SNr Six3 Gaba	Ldlrad4	1.07e-08	0.00019083	-0.0159908
197 SNr Six3 Gaba	Rpl17	3.41e-48	6.24e-44	0.0330685
197 SNr Six3 Gaba	Ier3ip1	1.67e-06	0.029354	0.0201718
197 SNr Six3 Gaba	Atp5f1a	1.29e-14	2.33e-10	0.0184162
197 SNr Six3 Gaba	Setbp1	2.13e-07	0.00376986	-0.0118464
197 SNr Six3 Gaba	Naa12	8.61e-10	1.54e-05	0.0266889
197 SNr Six3 Gaba	Ndufs8	9.93e-27	1.81e-22	0.0399337
197 SNr Six3 Gaba	Ndufv1	9.29e-18	1.68e-13	0.0327166
197 SNr Six3 Gaba	Gstp1	1.64e-14	2.95e-10	0.0475244
197 SNr Six3 Gaba	Mrpl11	3.46e-09	6.16e-05	0.0342084
197 SNr Six3 Gaba	Drap1	2.08e-12	3.75e-08	0.0311011
197 SNr Six3 Gaba	Ccdc85b	2.12e-12	3.8e-08	0.028411
197 SNr Six3 Gaba	Cfl1	6.11e-20	1.11e-15	0.0271549
197 SNr Six3 Gaba	Znrd2	2.09e-06	0.0367537	0.0299341
197 SNr Six3 Gaba	Malat1	1.3e-33	2.36e-29	-0.0110971
197 SNr Six3 Gaba	Fau	2.86e-49	5.23e-45	0.0365865
197 SNr Six3 Gaba	Arl2	2.12e-09	3.79e-05	0.023115
197 SNr Six3 Gaba	Ccdc88b	1.41e-06	0.0247194	0.0911374
197 SNr Six3 Gaba	Prdx5	1.64e-35	2.99e-31	0.0357509
197 SNr Six3 Gaba	Trmt112	3.34e-08	0.00059177	0.0256781
197 SNr Six3 Gaba	Fkbp2	1.66e-25	3.01e-21	0.0308276
197 SNr Six3 Gaba	Stip1	6.1e-08	0.00108164	0.0229566
197 SNr Six3 Gaba	Cox8a	2.76e-06	0.0483811	0.010729
197 SNr Six3 Gaba	Plaat3	2.13e-06	0.0373649	0.035244
197 SNr Six3 Gaba	Gng3	5.9e-10	1.05e-05	0.0185093
197 SNr Six3 Gaba	Uqcc3	1.45e-06	0.0254923	0.0362357
197 SNr Six3 Gaba	Eef1g	5.73e-20	1.04e-15	0.0267793
197 SNr Six3 Gaba	Fth1	3.18e-81	5.82e-77	0.0492979
197 SNr Six3 Gaba	Tmem258	8.99e-07	0.0158387	0.0235038
197 SNr Six3 Gaba	Psat1	2.08e-11	3.73e-07	0.0503605
197 SNr Six3 Gaba	Il33	8.72e-07	0.0153585	0.0342352
197 SNr Six3 Gaba	Cstf2t	2.33e-06	0.0409407	0.037806
197 SNr Six3 Gaba	Opalin	3.41e-07	0.00601843	-0.0342974
197 SNr Six3 Gaba	Pgam1	2.27e-11	4.07e-07	0.020062
197 SNr Six3 Gaba	Got1	2.6e-10	4.65e-06	0.019063
197 SNr Six3 Gaba	Ndufb8	2.44e-32	4.45e-28	0.030384
197 SNr Six3 Gaba	Mrpl43	1.6e-07	0.00283231	0.0249262
197 SNr Six3 Gaba	Sfxn3	1.79e-06	0.0315006	-0.0236308
197 SNr Six3 Gaba	Dpcd	2.56e-08	0.00045397	0.0253967
197 SNr Six3 Gaba	Cuedc2	3.55e-15	6.41e-11	0.0318607
197 SNr Six3 Gaba	Atp5mk	2.55e-20	4.62e-16	0.0275921
197 SNr Six3 Gaba	Sfr1	1.32e-07	0.00233772	0.0324582
215 SNc-VTA-RAmb Foxa1 Dopa	6330411D24Rik	2.41e-06	0.0312359	-0.138561
215 SNc-VTA-RAmb Foxa1 Dopa	Aldoa	1.68e-06	0.021708	0.0615017
215 SNc-VTA-RAmb Foxa1 Dopa	Mif	1.91e-06	0.0247885	0.0531057
318 Astro-NT NN	Gpr37l1	4.28e-06	0.04234	-0.0226515
318 Astro-NT NN	Atp1a2	3.81e-10	3.77e-06	-0.0223307
318 Astro-NT NN	Luzp2	1.36e-11	1.35e-07	0.0343299
318 Astro-NT NN	Cd81	9.76e-08	0.00096654	-0.0285213
318 Astro-NT NN	Msmo1	3.9e-11	3.87e-07	-0.0694166
318 Astro-NT NN	Cadm1	4.01e-06	0.0396736	0.0286266
318 Astro-NT NN	Gja1	5.33e-07	0.00527468	-0.0308191
318 Astro-NT NN	Nrxn3	1.24e-08	0.00012319	-0.0556979
318 Astro-NT NN	Clu	4.13e-06	0.0409081	-0.0306393
318 Astro-NT NN	Dock9	4.22e-06	0.0417855	0.0636037
318 Astro-NT NN	Lsamp	4.34e-08	0.00042955	0.0162231
318 Astro-NT NN	Rn18s-rs5	1.84e-13	1.82e-09	0.0507401
318 Astro-NT NN	AY036118	6.72e-13	6.67e-09	0.0575406
326 OPC NN	St18	4.9e-07	0.0052804	-0.0864844
326 OPC NN	Dock10	4.38e-06	0.0471242	-0.0344819
326 OPC NN	Nr6a1	2.76e-07	0.00297614	0.06053
326 OPC NN	Cldn11	1.92e-07	0.00206708	-0.115233
326 OPC NN	Col27a1	2.26e-06	0.0243249	0.062667
326 OPC NN	Slc24a2	2.02e-06	0.0217318	-0.0840404
326 OPC NN	Plpp3	1.28e-06	0.0137616	0.033142
326 OPC NN	Sparcl1	3.57e-19	3.85e-15	0.0508057
326 OPC NN	Frmd4b	2.83e-06	0.0304719	-0.131675
326 OPC NN	Chl1	1.2e-09	1.29e-05	0.101004
326 OPC NN	Apoe	5.48e-09	5.9e-05	0.0247399
326 OPC NN	5033426O07Rik	1.73e-08	0.00018671	0.0906571
326 OPC NN	Nkain2	1.16e-06	0.0124926	-0.0790487
326 OPC NN	Aldoc	1.74e-06	0.0187635	0.0445688
326 OPC NN	Ifi27	1.92e-09	2.07e-05	0.0667312
326 OPC NN	Rn18s-rs5	3.8e-11	4.1e-07	0.032386
326 OPC NN	AY036118	2.4e-09	2.59e-05	0.0387556
326 OPC NN	Pcdhb9	1.48e-07	0.00159149	0.0969756
326 OPC NN	Mbp	3.44e-09	3.71e-05	-0.0667573
327 Oligo NN	Xkr4	4.71e-14	7.06e-10	-0.0169074
327 Oligo NN	Sgk3	1.23e-19	1.86e-15	0.0244183
327 Oligo NN	Rpl7	6.21e-20	9.37e-16	0.0203124
327 Oligo NN	Adgrb3	1.59e-30	2.42e-26	0.023946
327 Oligo NN	Spata31e5	2.78e-10	4.12e-06	0.0598577
327 Oligo NN	Vwa3b	4.92e-07	0.00718373	0.0606217
327 Oligo NN	Pantr1	2.89e-20	4.36e-16	0.0426566
327 Oligo NN	Tmeff2	3.4e-103	5.19e-99	-0.0177299
327 Oligo NN	Gm28320	1.57e-09	2.32e-05	-0.0324238
327 Oligo NN	Hecw2	1.37e-18	2.06e-14	0.0103599
327 Oligo NN	Plcl1	1.19e-12	1.78e-08	0.00564796
327 Oligo NN	Eef1b2	1.7e-06	0.0246621	0.0138441
327 Oligo NN	Erbb4	1.24e-36	1.88e-32	-0.0169308
327 Oligo NN	Tmbim1	3.97e-19	5.99e-15	-0.0198671
327 Oligo NN	Ptprn	6.58e-12	9.82e-08	-0.0473519
327 Oligo NN	Acsl3	5.24e-09	7.76e-05	-0.0182819
327 Oligo NN	Dock10	1.29e-75	1.97e-71	-0.017078
327 Oligo NN	Bcl2	1.29e-06	0.0187539	0.0682832
327 Oligo NN	Cdh19	3.31e-22	5e-18	-0.0150527
327 Oligo NN	Tsn	2.79e-06	0.04056	0.0160043
327 Oligo NN	Gli2	1.51e-22	2.28e-18	0.112373
327 Oligo NN	Gm29455	6.75e-07	0.00986476	0.0264265
327 Oligo NN	Nckap5	9.77e-25	1.48e-20	-0.0936312
327 Oligo NN	Mgat5	8.85e-09	0.00013067	-0.0318796
327 Oligo NN	Tmem163	3.26e-21	4.93e-17	-0.0538987
327 Oligo NN	R3hdm1	5.66e-22	8.56e-18	-0.0195078
327 Oligo NN	Rab7b	2.81e-07	0.00411368	-0.135305
327 Oligo NN	Rnpep	3.12e-07	0.00456894	0.0214021
327 Oligo NN	Tnni1	1.46e-06	0.0211789	-0.0125021
327 Oligo NN	Gm4258	5.41e-18	8.15e-14	-0.0114799
327 Oligo NN	Brinp3	1.4e-09	2.07e-05	-0.044858
327 Oligo NN	Rabgap1l	1.99e-06	0.0289204	-0.0088955
327 Oligo NN	Rc3h1	2.85e-06	0.0413084	-0.0139407
327 Oligo NN	Gas5	8.63e-07	0.0125942	0.0154643
327 Oligo NN	Dnm3	1.85e-11	2.76e-07	-0.00696
327 Oligo NN	Creg1	1.44e-06	0.0209612	0.0318463
327 Oligo NN	Igsf8	1.35e-61	2.05e-57	-0.0568047
327 Oligo NN	Dusp23	1.72e-06	0.0249567	0.0399472
327 Oligo NN	Aim2	2.61e-17	3.93e-13	0.0756558
327 Oligo NN	Fmn2	2.59e-07	0.00378529	-0.0502428
327 Oligo NN	Cdc42bpa	1.1e-49	1.68e-45	0.0156327
327 Oligo NN	Lefty1	1.72e-06	0.0250064	0.0557837
327 Oligo NN	Ephx1	4.75e-10	7.06e-06	0.0509209
327 Oligo NN	Degs1	1.78e-09	2.64e-05	-0.0114672
327 Oligo NN	1700047M11Rik	2.06e-40	3.13e-36	-0.0214089
327 Oligo NN	Dusp10	7.37e-07	0.0107619	-0.0187012
327 Oligo NN	Mtarc2	1.28e-09	1.9e-05	0.0242033
327 Oligo NN	Traf5	1.17e-06	0.0170637	-0.0236677
327 Oligo NN	Cd34	1.69e-06	0.0245212	0.0708785
327 Oligo NN	A330023F24Rik	1.09e-10	1.62e-06	0.0215616
327 Oligo NN	Camk1d	2.12e-22	3.21e-18	0.0218511
327 Oligo NN	Usp6nl	5.96e-14	8.93e-10	-0.0322486
327 Oligo NN	Itih5	1.27e-16	1.91e-12	0.0981355
327 Oligo NN	Hacd1	1.17e-06	0.0170033	-0.0222574
327 Oligo NN	Pip4k2a	1.94e-07	0.0028477	0.00774088
327 Oligo NN	Arhgap21	4.2e-08	0.00061881	0.0109144
327 Oligo NN	Gpr158	1.43e-12	2.14e-08	0.0288357
327 Oligo NN	Hnmt	2.37e-07	0.00347456	-0.0908744
327 Oligo NN	Mrpl41	4.43e-07	0.00647852	0.0166802
327 Oligo NN	Ptgds	2.69e-111	4.11e-107	0.0335267
327 Oligo NN	Bmyc	1.71e-06	0.0249123	0.0175668
327 Oligo NN	Rpl7a	2.74e-12	4.09e-08	0.0166993
327 Oligo NN	Cercam	2.27e-11	3.38e-07	-0.0363735
327 Oligo NN	Phyhd1	1.88e-32	2.86e-28	0.107725
327 Oligo NN	Fnbp1	6.4e-100	9.77e-96	-0.0218978
327 Oligo NN	Abl1	5.12e-07	0.00748771	-0.0145592
327 Oligo NN	Eeig1	1.87e-07	0.00273416	-0.0144623
327 Oligo NN	Rpl12	1.17e-06	0.0169776	0.0153617
327 Oligo NN	Ralgps1	3.45e-06	0.0499925	-0.0107801
327 Oligo NN	Mapkap1	9.44e-07	0.0137691	-0.0154227
327 Oligo NN	Gsn	4.26e-53	6.48e-49	-0.0306607
327 Oligo NN	Zeb2	3.09e-22	4.68e-18	-0.0093476
327 Oligo NN	Lypd6b	2.08e-06	0.0302298	0.0428425
327 Oligo NN	Tnfaip6	1.61e-13	2.41e-09	-0.01142
327 Oligo NN	Fmnl2	1.2e-30	1.82e-26	0.0170134
327 Oligo NN	Rbms1	3.84e-09	5.68e-05	0.0569662
327 Oligo NN	Slc4a10	2.4e-20	3.63e-16	0.0241298
327 Oligo NN	Dcaf17	3.48e-07	0.00508319	-0.0138018
327 Oligo NN	Wipf1	4.49e-08	0.00066029	-0.0123069
327 Oligo NN	Itprid2	1.01e-06	0.0147498	0.0137038
327 Oligo NN	Itgav	1.04e-08	0.00015377	0.0143622
327 Oligo NN	Gm13889	2.74e-06	0.0397893	-0.0673686
327 Oligo NN	Lrrc4c	8.61e-181	1.32e-176	0.0302352
327 Oligo NN	Cd59a	9.94e-32	1.51e-27	-0.0584567
327 Oligo NN	Aven	1.11e-19	1.68e-15	0.0367068
327 Oligo NN	Tyro3	7.87e-08	0.00115612	-0.0176725
327 Oligo NN	Frmd5	1.15e-09	1.7e-05	-0.0057496
327 Oligo NN	B2m	1.14e-24	1.73e-20	0.0587141
327 Oligo NN	Mal	1.51e-34	2.3e-30	-0.0129283
327 Oligo NN	Nop56	3.18e-09	4.71e-05	0.0323631
327 Oligo NN	Dnaaf9	2.57e-12	3.83e-08	-0.0125268
327 Oligo NN	Atrn	5.03e-07	0.00734815	-0.0111391
327 Oligo NN	Pak5	1.04e-11	1.55e-07	-0.0088735
327 Oligo NN	Nkx2-2	5.45e-08	0.00080221	-0.0255709
327 Oligo NN	Sox12	2.61e-06	0.0378758	-0.0783685
327 Oligo NN	Dusp15	1.33e-11	1.99e-07	0.0181156
327 Oligo NN	Snhg11	9.53e-09	0.00014079	-0.0265034
327 Oligo NN	Sgk2	6.57e-08	0.00096647	-0.0321481
327 Oligo NN	Sys1	1.57e-09	2.33e-05	0.0151947
327 Oligo NN	Dbndd2	1.86e-45	2.83e-41	0.0178849
327 Oligo NN	Ctsa	7.97e-13	1.19e-08	-0.0227156
327 Oligo NN	Bcas1	1.54e-20	2.33e-16	-0.0146237
327 Oligo NN	Ctsz	6.43e-17	9.68e-13	0.0345161
327 Oligo NN	Rps21	9e-09	0.00013291	0.012989
327 Oligo NN	Zfp704	1.19e-06	0.0173644	-0.0138917
327 Oligo NN	Fabp5	1.42e-06	0.0206559	-0.0122072
327 Oligo NN	Tnik	1.06e-07	0.00155324	-0.0223635
327 Oligo NN	Cldn11	6.8e-146	1.04e-141	-0.0310112
327 Oligo NN	Gnb4	4.31e-12	6.43e-08	-0.0377566
327 Oligo NN	Ndufb5	1.5e-06	0.021872	0.0151276
327 Oligo NN	Pex5l	6.38e-23	9.65e-19	-0.0092451
327 Oligo NN	4930419G24Rik	3.45e-12	5.15e-08	-0.0149804
327 Oligo NN	Atp11b	8.16e-07	0.01191	-0.0157432
327 Oligo NN	Pcdh10	1.61e-06	0.0234442	-0.0275704
327 Oligo NN	Maml3	4.56e-12	6.8e-08	0.0334152
327 Oligo NN	Ankub1	1.72e-06	0.0250206	0.0137129
327 Oligo NN	Med12l	1.36e-08	0.00020038	-0.056687
327 Oligo NN	Kcnab1	1.78e-30	2.7e-26	0.028935
327 Oligo NN	A330015K06Rik	4.17e-35	6.34e-31	0.0221882
327 Oligo NN	Trim59	6.69e-20	1.01e-15	-0.0180493
327 Oligo NN	B3galnt1	5.09e-08	0.00074814	0.0538783
327 Oligo NN	Gm20754	5.44e-15	8.17e-11	-0.0656029
327 Oligo NN	Fnip2	3.78e-07	0.00552661	-0.0172386
327 Oligo NN	Gria2	3.84e-09	5.68e-05	-0.0324598
327 Oligo NN	Ctso	2.64e-09	3.91e-05	-0.023381
327 Oligo NN	Sh3d19	8.81e-15	1.32e-10	-0.0177751
327 Oligo NN	Rps3a1	3.43e-22	5.19e-18	0.0208376
327 Oligo NN	Dclk2	1.75e-06	0.0253952	-0.0410841
327 Oligo NN	Hapln2	5.47e-28	8.3e-24	0.018913
327 Oligo NN	Naxe	1.05e-06	0.0152401	0.0160496
327 Oligo NN	Lamtor2	2.04e-06	0.0296696	0.0213521
327 Oligo NN	Syt11	9.89e-13	1.48e-08	-0.0093692
327 Oligo NN	1500004A13Rik	1.08e-14	1.62e-10	-0.0176804
327 Oligo NN	Thbs3	2.62e-08	0.00038538	-0.0613295
327 Oligo NN	S100a1	6.8e-17	1.02e-12	0.0268797
327 Oligo NN	Psmb4	1.55e-06	0.0225685	0.0150212
327 Oligo NN	Cers2	6.31e-12	9.42e-08	-0.0138594
327 Oligo NN	Bola1	1.12e-06	0.016288	0.0338638
327 Oligo NN	Phgdh	1.2e-08	0.0001777	0.0124699
327 Oligo NN	A230001M10Rik	4.26e-16	6.4e-12	0.0135581
327 Oligo NN	Tspan2	3.05e-57	4.64e-53	-0.0230478
327 Oligo NN	Rap1a	5.15e-22	7.79e-18	-0.0203399
327 Oligo NN	Gstm5	3.92e-17	5.9e-13	0.0188297
327 Oligo NN	Gstm7	4.5e-07	0.00658355	0.0166269
327 Oligo NN	Gstm6	4.28e-08	0.00062982	0.0535707
327 Oligo NN	Gstm1	2.24e-231	3.42e-227	0.101459
327 Oligo NN	Plppr5	1.18e-06	0.0171815	-0.0664096
327 Oligo NN	Dpyd	3.5e-59	5.33e-55	0.0288003
327 Oligo NN	Synpo2	2.02e-07	0.00296273	0.0658996
327 Oligo NN	Tram1l1	1.06e-07	0.00155937	-0.0829704
327 Oligo NN	Ugt8a	5.75e-11	8.56e-07	-0.0081556
327 Oligo NN	Elovl6	8e-07	0.0116786	-0.0163754
327 Oligo NN	Slc9b2	2.12e-14	3.17e-10	0.0712564
327 Oligo NN	H2az1	9.92e-07	0.0144567	0.0165989
327 Oligo NN	Tspan5	2.47e-06	0.0359131	0.00902395
327 Oligo NN	Gm16233	6.17e-08	0.00090758	0.0357997
327 Oligo NN	Ttll7	2.3e-11	3.42e-07	-0.00965
327 Oligo NN	Negr1	5.6e-08	0.00082416	-0.0168516
327 Oligo NN	Mmp16	8.42e-14	1.26e-09	-0.0740156
327 Oligo NN	Pnisr	2.77e-09	4.1e-05	0.0123723
327 Oligo NN	Fut9	2.11e-26	3.2e-22	0.0622623
327 Oligo NN	Tmod1	3.39e-33	5.15e-29	-0.036082
327 Oligo NN	Nipsnap3b	2.22e-06	0.0321969	-0.0358412
327 Oligo NN	Abca1	1.64e-11	2.44e-07	0.0210317
327 Oligo NN	Snx30	2.27e-07	0.00332225	-0.0137628
327 Oligo NN	Astn2	2.64e-13	3.95e-09	-0.0573928
327 Oligo NN	C630043F03Rik	3.37e-06	0.048834	-0.028456
327 Oligo NN	Ptprd	9.02e-118	1.38e-113	-0.0153846
327 Oligo NN	Rps6	1.44e-29	2.18e-25	0.0264235
327 Oligo NN	Slc24a2	3.81e-16	5.73e-12	-0.0060948
327 Oligo NN	Jun	3.27e-06	0.0473825	-0.0259769
327 Oligo NN	Dnajc6	9.91e-08	0.00145609	-0.013342
327 Oligo NN	Leprot	5.33e-07	0.00778288	-0.0245138
327 Oligo NN	Pde4b	5.64e-31	8.56e-27	-0.0078168
327 Oligo NN	Dab1	2.76e-07	0.00403275	-0.0398292
327 Oligo NN	Plpp3	2.17e-11	3.23e-07	-0.0295926
327 Oligo NN	Dhcr24	1.14e-11	1.69e-07	-0.0582755
327 Oligo NN	Uqcrh	1.41e-12	2.1e-08	0.0199479
327 Oligo NN	Prdx1	4.54e-13	6.79e-09	0.0118043
327 Oligo NN	Rps8	7.09e-21	1.07e-16	0.0167047
327 Oligo NN	Rnf220	5.19e-07	0.00758511	-0.0057121
327 Oligo NN	Ctps1	1.35e-07	0.00198105	-0.0508026
327 Oligo NN	Mfsd2a	1.65e-14	2.47e-10	0.0622473
327 Oligo NN	Gm2164	9.17e-10	1.36e-05	0.0472642
327 Oligo NN	Pou3f1	3.47e-41	5.29e-37	0.0475068
327 Oligo NN	1110065P20Rik	2.84e-06	0.0411678	-0.0248554
327 Oligo NN	Map7d1	1.57e-15	2.35e-11	-0.020934
327 Oligo NN	Csmd2	3.35e-21	5.06e-17	-0.0397785
327 Oligo NN	Marcksl1	2.25e-17	3.38e-13	-0.0674227
327 Oligo NN	Nkain1	6.11e-08	0.00089837	-0.0120197
327 Oligo NN	Sh3bgrl3	1.1e-08	0.00016217	0.0167866
327 Oligo NN	Rsrp1	4.27e-15	6.41e-11	0.013334
327 Oligo NN	Clic4	3.53e-09	5.23e-05	-0.0133175
327 Oligo NN	C1qb	1.13e-06	0.0164362	0.0454548
327 Oligo NN	C1qa	1.77e-06	0.0257359	0.0507948
327 Oligo NN	Pink1	4.26e-10	6.32e-06	0.0239193
327 Oligo NN	Mrto4	6.07e-07	0.00887099	0.0285907
327 Oligo NN	Arhgef19	1.78e-06	0.025872	-0.0738579
327 Oligo NN	Gm13052	9.59e-13	1.43e-08	0.0722453
327 Oligo NN	Errfi1	5.44e-17	8.19e-13	0.0261456
327 Oligo NN	Per3	4.39e-08	0.00064573	0.0286074
327 Oligo NN	Prkcz	7.31e-09	0.00010799	-0.0146297
327 Oligo NN	Tmem278	1.69e-08	0.00024919	-0.013008
327 Oligo NN	Agrn	1.05e-09	1.55e-05	-0.0256229
327 Oligo NN	Cyp51	9.65e-13	1.44e-08	-0.0369952
327 Oligo NN	Cdk14	1.06e-11	1.59e-07	-0.0479662
327 Oligo NN	Sema3d	3.79e-14	5.68e-10	-0.102992
327 Oligo NN	Abcb8	2.21e-19	3.33e-15	-0.0434638
327 Oligo NN	Slc4a2	1.3e-20	1.96e-16	-0.0323458
327 Oligo NN	Mxd4	3.07e-07	0.00448541	0.0199295
327 Oligo NN	Add1	8.35e-16	1.26e-11	-0.0175797
327 Oligo NN	Ablim2	6.52e-32	9.9e-28	-0.038811
327 Oligo NN	Hs3st1	2.22e-19	3.35e-15	-0.0280645
327 Oligo NN	Prom1	2.88e-06	0.0418274	-0.215036
327 Oligo NN	Lcorl	1.08e-10	1.6e-06	-0.0166278
327 Oligo NN	Pcdh7	1.72e-59	2.62e-55	-0.116526
327 Oligo NN	Klhl5	1.23e-08	0.00018224	-0.0354073
327 Oligo NN	Rpl9	6.05e-29	9.17e-25	0.0237332
327 Oligo NN	Apbb2	2.26e-08	0.00033357	0.0111738
327 Oligo NN	Kit	4.35e-12	6.49e-08	-0.074057
327 Oligo NN	Tmem165	1.18e-06	0.0171172	-0.016329
327 Oligo NN	Hopx	2.47e-26	3.74e-22	0.0590566
327 Oligo NN	Art3	1.29e-17	1.94e-13	0.101835
327 Oligo NN	Tmem150c	9.88e-07	0.0144077	0.0588445
327 Oligo NN	Tgfbr3	1.59e-17	2.4e-13	0.0815461
327 Oligo NN	Rpl5	4.77e-13	7.13e-09	0.0176167
327 Oligo NN	Pxmp2	1.27e-06	0.0184205	0.0408969
327 Oligo NN	Coro1c	5.95e-09	8.79e-05	-0.0213348
327 Oligo NN	Pop5	3.06e-06	0.0444635	0.024912
327 Oligo NN	Dynll1	1.94e-12	2.9e-08	0.0211828
327 Oligo NN	Rplp0	1.78e-07	0.00261432	0.0139739
327 Oligo NN	Rasal1	2.48e-17	3.73e-13	-0.0319613
327 Oligo NN	Rpl6	4.17e-10	6.19e-06	0.0124875
327 Oligo NN	Cux2	6.84e-08	0.00100546	-0.0310064
327 Oligo NN	Ubc	3.14e-18	4.74e-14	0.0131776
327 Oligo NN	Tmem132b	2.85e-11	4.25e-07	0.0205247
327 Oligo NN	Tmem132d	4.96e-13	7.42e-09	0.0219394
327 Oligo NN	Chchd2	5.12e-08	0.00075315	0.011574
327 Oligo NN	Galnt17	2.06e-17	3.1e-13	0.0548331
327 Oligo NN	Auts2	1.03e-38	1.56e-34	-0.0209503
327 Oligo NN	Gnb2	3.44e-08	0.00050606	-0.0168493
327 Oligo NN	Tsc22d4	9.23e-32	1.4e-27	0.0216562
327 Oligo NN	Gjc3	2.08e-07	0.00304862	-0.0066177
327 Oligo NN	Gna12	4.75e-10	7.05e-06	-0.0127391
327 Oligo NN	Actb	3.32e-14	4.97e-10	-0.0099048
327 Oligo NN	Fscn1	1.72e-09	2.55e-05	-0.0183203
327 Oligo NN	Smurf1	1.64e-07	0.00241249	-0.0443198
327 Oligo NN	Rpl21	4.13e-21	6.24e-17	0.0191089
327 Oligo NN	Fry	5.12e-19	7.71e-15	-0.0322282
327 Oligo NN	Ppp1r9a	9.77e-10	1.45e-05	-0.0184105
327 Oligo NN	Pon2	1.54e-13	2.3e-09	0.0221023
327 Oligo NN	Pdk4	3.01e-08	0.00044295	0.0435734
327 Oligo NN	Dync1i1	1.86e-26	2.82e-22	0.0405236
327 Oligo NN	Cttnbp2	8.19e-09	0.00012103	-0.0115635
327 Oligo NN	Aass	1.81e-08	0.00026613	0.185064
327 Oligo NN	Cadps2	4.85e-11	7.22e-07	0.0343753
327 Oligo NN	Tmem229a	1.35e-11	2.01e-07	0.0191731
327 Oligo NN	Gpr37	1.73e-25	2.62e-21	-0.0154964
327 Oligo NN	Grm8	1.56e-10	2.31e-06	0.0522521
327 Oligo NN	Atp6v1f	1.09e-07	0.00159658	0.0166248
327 Oligo NN	Mest	2.35e-11	3.49e-07	0.0592433
327 Oligo NN	Lncpint	7.2e-25	1.09e-20	0.0263807
327 Oligo NN	Ptn	6.59e-23	9.97e-19	-0.013022
327 Oligo NN	Dgki	6.95e-26	1.05e-21	0.0141233
327 Oligo NN	Luc7l2	4.76e-08	0.00070064	-0.0071887
327 Oligo NN	Hipk2	4.55e-12	6.79e-08	-0.0110112
327 Oligo NN	Gstk1	5.33e-21	8.05e-17	0.0461284
327 Oligo NN	Tra2a	6.22e-09	9.19e-05	-0.0118341
327 Oligo NN	Creb5	3.42e-21	5.18e-17	-0.0202328
327 Oligo NN	Abcg2	1.24e-08	0.00018272	-0.0738246
327 Oligo NN	Nap1l5	4.04e-08	0.00059537	0.0109519
327 Oligo NN	A530053G22Rik	3.42e-154	5.22e-150	0.117034
327 Oligo NN	Snca	2.29e-34	3.47e-30	0.0505809
327 Oligo NN	Ccser1	5.99e-15	8.99e-11	0.0197759
327 Oligo NN	Vamp8	5.07e-07	0.00740302	0.0519948
327 Oligo NN	Mat2a	1.56e-31	2.37e-27	0.0200943
327 Oligo NN	Ctnna2	1.46e-06	0.021309	0.00664479
327 Oligo NN	Dctn1	2.85e-06	0.0414187	-0.0143402
327 Oligo NN	Exoc6b	8.47e-09	0.00012512	-0.0076368
327 Oligo NN	Anxa4	5.34e-07	0.00779528	-0.0483735
327 Oligo NN	Mgll	9.39e-14	1.41e-09	-0.0795903
327 Oligo NN	Klf15	1.24e-06	0.0179989	0.0267268
327 Oligo NN	Frmd4b	2.02e-07	0.00295282	-0.0076281
327 Oligo NN	Cntn4	1.56e-07	0.00228188	0.0428065
327 Oligo NN	Grm7	1.09e-14	1.63e-10	-0.0133774
327 Oligo NN	Rpl32	5.62e-15	8.45e-11	0.0205156
327 Oligo NN	Tmcc1	3.44e-06	0.0498868	-0.0063514
327 Oligo NN	Zfand4	2.02e-07	0.00295773	0.0243658
327 Oligo NN	Cacna2d4	5.43e-13	8.13e-09	-0.0780421
327 Oligo NN	Adipor2	1.52e-87	2.32e-83	0.0261984
327 Oligo NN	Wnk1	1.44e-08	0.00021199	-0.0073237
327 Oligo NN	Ninj2	7.87e-11	1.17e-06	-0.0135266
327 Oligo NN	Mical3	1.61e-11	2.4e-07	-0.0240552
327 Oligo NN	Iffo1	4.4e-20	6.64e-16	-0.035789
327 Oligo NN	Gapdh	5.36e-12	8e-08	0.0101782
327 Oligo NN	Cd9	5.25e-08	0.00077207	-0.009859
327 Oligo NN	Kcna1	7.49e-20	1.13e-15	-0.0174027
327 Oligo NN	Tspan9	7.47e-10	1.11e-05	-0.025516
327 Oligo NN	Dusp16	1.3e-11	1.94e-07	-0.018371
327 Oligo NN	Hebp1	1.69e-13	2.53e-09	-0.0433468
327 Oligo NN	H2aj	6.9e-13	1.03e-08	-0.016123
327 Oligo NN	Tmtc1	3.03e-16	4.56e-12	-0.114518
327 Oligo NN	Dennd5b	1.15e-08	0.00016952	0.0144468
327 Oligo NN	Rps9	3.07e-12	4.59e-08	0.0156982
327 Oligo NN	Ttyh1	6.08e-31	9.24e-27	-0.0677233
327 Oligo NN	Rps5	7.38e-19	1.11e-14	0.0188502
327 Oligo NN	Selenow	3.31e-12	4.93e-08	0.0183998
327 Oligo NN	Hif3a	4.33e-21	6.54e-17	0.068282
327 Oligo NN	Apoe	1.09e-170	1.66e-166	0.0335077
327 Oligo NN	Rabac1	2.76e-16	4.15e-12	0.0144571
327 Oligo NN	Rps16	8.68e-11	1.29e-06	0.014464
327 Oligo NN	Eif3k	1.51e-07	0.00221874	0.017282
327 Oligo NN	Ppp1r14a	2.15e-09	3.18e-05	0.00916799
327 Oligo NN	Aplp1	1.28e-07	0.00187419	-0.0043
327 Oligo NN	Mag	7.85e-41	1.2e-36	-0.0117451
327 Oligo NN	Gm44662	1.12e-06	0.0163309	-0.0315548
327 Oligo NN	Tshz3	7.76e-11	1.15e-06	-0.144162
327 Oligo NN	Zfp536	4.7e-07	0.00686646	-0.0054289
327 Oligo NN	Plekhf1	3.26e-06	0.0473067	0.0264561
327 Oligo NN	Gm33989	1.25e-07	0.00183816	-0.0179494
327 Oligo NN	Josd2	6.65e-11	9.9e-07	-0.0111858
327 Oligo NN	Emc10	3.52e-08	0.00051858	-0.012777
327 Oligo NN	Rps11	1.26e-07	0.00185045	0.0137567
327 Oligo NN	Rpl13a	5.47e-27	8.29e-23	0.025481
327 Oligo NN	Snrnp70	2.92e-12	4.35e-08	-0.0127082
327 Oligo NN	Ftl1	8.73e-18	1.31e-13	0.019434
327 Oligo NN	Rpl18	1.21e-41	1.85e-37	0.0264762
327 Oligo NN	Mrgpra2b	1.56e-08	0.00022978	0.114419
327 Oligo NN	Nav2	7.73e-10	1.15e-05	0.0215522
327 Oligo NN	Luzp2	1.37e-12	2.05e-08	-0.0273822
327 Oligo NN	Snrpn	2.84e-07	0.00415066	-0.0131864
327 Oligo NN	A230057D06Rik	1.47e-13	2.2e-09	-0.0207222
327 Oligo NN	A330076H08Rik	1.66e-11	2.47e-07	-0.024845
327 Oligo NN	Ndn	8.12e-20	1.22e-15	-0.0460266
327 Oligo NN	Otud7a	7.33e-19	1.1e-14	0.0149521
327 Oligo NN	Klf13	2.25e-22	3.4e-18	0.0176197
327 Oligo NN	Tjp1	1.24e-19	1.86e-15	-0.0208659
327 Oligo NN	Slco3a1	4.69e-08	0.0006906	0.0113706
327 Oligo NN	Pde8a	1.59e-14	2.39e-10	-0.0119277
327 Oligo NN	Cpeb1	2.24e-06	0.0324752	0.0166889
327 Oligo NN	Sh3gl3	1.51e-14	2.26e-10	-0.0302558
327 Oligo NN	Ctxnd1	2.63e-09	3.9e-05	0.054424
327 Oligo NN	Sytl2	7.99e-54	1.22e-49	-0.0291796
327 Oligo NN	Tenm4	6.41e-09	9.48e-05	-0.0387766
327 Oligo NN	Pak1	1.78e-11	2.65e-07	-0.0094084
327 Oligo NN	Dgat2	1.58e-08	0.0002323	-0.0571833
327 Oligo NN	Rps3	3.96e-20	5.98e-16	0.0181136
327 Oligo NN	Plekhb1	3.14e-09	4.64e-05	0.0162559
327 Oligo NN	Arap1	1.25e-07	0.00182919	-0.0285131
327 Oligo NN	Rhog	5.58e-30	8.46e-26	0.0218371
327 Oligo NN	Rpl27a	1.66e-11	2.48e-07	0.0134703
327 Oligo NN	Dennd5a	1.17e-11	1.74e-07	-0.0161393
327 Oligo NN	Rps15a	8.38e-08	0.00123168	0.0139916
327 Oligo NN	Gde1	6.45e-20	9.74e-16	-0.0263493
327 Oligo NN	Ccp110	2.5e-22	3.77e-18	-0.0190199
327 Oligo NN	Gprc5b	7.45e-13	1.11e-08	-0.0153902
327 Oligo NN	Polr3e	2.09e-37	3.18e-33	-0.0332334
327 Oligo NN	Usp31	4.06e-16	6.1e-12	0.0156663
327 Oligo NN	Aldoa	1.51e-26	2.29e-22	0.0192938
327 Oligo NN	Kctd13	1.97e-30	2.98e-26	0.0190585
327 Oligo NN	Sez6l2	3.36e-13	5.02e-09	0.0101541
327 Oligo NN	Zfp771	2.38e-14	3.58e-10	0.0290095
327 Oligo NN	Fgfr2	2.54e-07	0.00372138	-0.0058372
327 Oligo NN	Plekha1	4.54e-45	6.91e-41	-0.0316384
327 Oligo NN	Htra1	2.42e-110	3.7e-106	0.0736566
327 Oligo NN	Rplp2	9.87e-10	1.46e-05	0.0152975
327 Oligo NN	Cd81	1.74e-39	2.65e-35	-0.0152207
327 Oligo NN	Trappc5	4.04e-13	6.05e-09	0.0350112
327 Oligo NN	Arhgef10	1.1e-10	1.64e-06	0.0111663
327 Oligo NN	Polb	5.59e-07	0.00815953	-0.0144968
327 Oligo NN	Plat	2.49e-27	3.78e-23	-0.0825123
327 Oligo NN	Golga7	7.95e-10	1.18e-05	-0.0234081
327 Oligo NN	Hook3	7.78e-16	1.17e-11	-0.0168214
327 Oligo NN	Unc5d	8.39e-19	1.26e-14	0.103437
327 Oligo NN	Rnf122	7.68e-10	1.14e-05	-0.0450065
327 Oligo NN	Tusc3	6.18e-13	9.24e-09	-0.0391203
327 Oligo NN	Slc25a4	4.7e-07	0.00687418	0.010105
327 Oligo NN	Stox2	3.81e-08	0.00056044	-0.0140404
327 Oligo NN	Scrg1	2.49e-10	3.7e-06	-0.0742405
327 Oligo NN	Galnt7	2.72e-13	4.07e-09	0.0169083
327 Oligo NN	Spock3	5.16e-55	7.86e-51	0.0199266
327 Oligo NN	Msmo1	1.19e-29	1.8e-25	-0.041057
327 Oligo NN	Klhl2	7.71e-14	1.16e-09	-0.0110997
327 Oligo NN	Marchf1	9.49e-14	1.42e-09	0.00968273
327 Oligo NN	Tma16	2.83e-07	0.00413545	-0.0300796
327 Oligo NN	Psd3	6.3e-29	9.55e-25	-0.0293953
327 Oligo NN	Ndufa13	1.87e-13	2.79e-09	0.0178063
327 Oligo NN	Cope	6.05e-09	8.94e-05	0.0181325
327 Oligo NN	Tmem59l	4.32e-18	6.51e-14	0.0426814
327 Oligo NN	Arrdc2	3.45e-08	0.0005081	0.0202286
327 Oligo NN	Rpl18a	1.29e-10	1.92e-06	0.0142091
327 Oligo NN	Large1	1.68e-11	2.5e-07	-0.0343423
327 Oligo NN	Hhip	7.99e-13	1.19e-08	-0.0248979
327 Oligo NN	D8Ertd738e	3.16e-06	0.0458656	0.0199588
327 Oligo NN	4930488L21Rik	1.36e-08	0.00020061	0.0299187
327 Oligo NN	Gnao1	3.81e-53	5.8e-49	0.0199296
327 Oligo NN	Mt1	6.65e-09	9.83e-05	0.0119757
327 Oligo NN	Herpud1	3.26e-06	0.0472837	0.0207607
327 Oligo NN	Pllp	3.05e-100	4.65e-96	-0.0303986
327 Oligo NN	Adgrg1	4.4e-10	6.53e-06	-0.0900455
327 Oligo NN	Ndrg4	2.11e-06	0.030632	-0.0258297
327 Oligo NN	Cdh8	1.46e-59	2.22e-55	0.0627237
327 Oligo NN	Dync1li2	8.29e-07	0.012103	-0.0145796
327 Oligo NN	Tppp3	1.14e-40	1.73e-36	0.0365432
327 Oligo NN	Fa2h	1.66e-24	2.52e-20	-0.0158659
327 Oligo NN	Bcar1	2.9e-08	0.00042692	-0.0201604
327 Oligo NN	Wwox	1.94e-10	2.89e-06	0.0151381
327 Oligo NN	Cdyl2	9.49e-10	1.41e-05	-0.0946225
327 Oligo NN	Cox4i1	9.31e-22	1.41e-17	0.0149249
327 Oligo NN	Rpl13	3.76e-20	5.68e-16	0.0164752
327 Oligo NN	Rhou	1.44e-08	0.00021188	-0.0104016
327 Oligo NN	Rab4a	1.05e-09	1.56e-05	-0.0322324
327 Oligo NN	Gria4	1.42e-15	2.14e-11	-0.0180434
327 Oligo NN	S1pr5	2.06e-07	0.00301255	-0.0160034
327 Oligo NN	Tmem205	1.07e-07	0.00156868	0.016854
327 Oligo NN	Elavl3	7.41e-07	0.0108155	-0.0101149
327 Oligo NN	Anln	1.48e-29	2.25e-25	0.0186243
327 Oligo NN	Septin7	1.05e-48	1.6e-44	-0.0132296
327 Oligo NN	Opcml	1.33e-12	1.99e-08	-0.0173194
327 Oligo NN	Aplp2	1.63e-19	2.45e-15	0.0180239
327 Oligo NN	7630403G23Rik	1.26e-07	0.00184488	0.0222582
327 Oligo NN	Kirrel3	1.59e-21	2.4e-17	-0.0272028
327 Oligo NN	Hspa8	2.84e-36	4.32e-32	0.0191504
327 Oligo NN	1700063D05Rik	1.42e-07	0.00207639	0.0209491
327 Oligo NN	Sc5d	2.8e-08	0.00041295	-0.024442
327 Oligo NN	Nectin1	4.62e-09	6.84e-05	-0.0273885
327 Oligo NN	Mcam	2.45e-28	3.71e-24	-0.0441466
327 Oligo NN	Phldb1	4.37e-47	6.65e-43	-0.021708
327 Oligo NN	Zbtb16	1.25e-25	1.89e-21	0.0276062
327 Oligo NN	Cryab	8.82e-29	1.34e-24	0.0141909
327 Oligo NN	Scaper	1.9e-07	0.00278259	-0.014251
327 Oligo NN	Scamp5	1.19e-06	0.0173222	-0.0135656
327 Oligo NN	Rplp1	1.63e-22	2.46e-18	0.0171884
327 Oligo NN	Hmgcll1	3.17e-11	4.72e-07	-0.0665158
327 Oligo NN	Fam83b	3.32e-06	0.0481298	0.0801051
327 Oligo NN	Cilk1	4.77e-09	7.06e-05	-0.0181459
327 Oligo NN	Snap91	3.94e-14	5.9e-10	-0.0347183
327 Oligo NN	Ctsh	1.35e-06	0.0196544	0.067566
327 Oligo NN	Pcolce2	8.13e-09	0.00012011	0.0144373
327 Oligo NN	Pxylp1	2.33e-07	0.00341846	0.0449333
327 Oligo NN	Pcbp4	2.08e-09	3.08e-05	-0.0159125
327 Oligo NN	Gm42756	8.88e-14	1.33e-09	0.0265539
327 Oligo NN	Clasp2	9.44e-13	1.41e-08	-0.0077422
327 Oligo NN	Rpsa	1.57e-22	2.37e-18	0.0174007
327 Oligo NN	Myrip	7.26e-07	0.0106029	0.0611972
327 Oligo NN	Rpl14	4.47e-19	6.75e-15	0.0203312
327 Oligo NN	Cck	8.52e-08	0.00125155	-0.0387067
327 Oligo NN	Lars2	2.28e-13	3.42e-09	0.0217843
327 Oligo NN	Plekhg1	2.54e-07	0.00372284	-0.0093823
327 Oligo NN	Syne1	3.53e-16	5.3e-12	-0.0418586
327 Oligo NN	Ust	1.78e-14	2.67e-10	-0.0494486
327 Oligo NN	Map3k5	5.61e-09	8.29e-05	0.0374904
327 Oligo NN	Sgk1	1.78e-240	2.72e-236	0.0509343
327 Oligo NN	Eya4	9.13e-40	1.39e-35	0.077612
327 Oligo NN	Rps12	1.45e-08	0.00021421	0.0151911
327 Oligo NN	Grik2	2.2e-10	3.27e-06	-0.0093292
327 Oligo NN	Man1a	3.41e-49	5.19e-45	-0.188404
327 Oligo NN	Fabp7	1.46e-13	2.18e-09	-0.11853
327 Oligo NN	Ddit4	1.87e-06	0.0271764	0.016895
327 Oligo NN	Chst3	2.28e-06	0.03316	-0.0495962
327 Oligo NN	Tspan15	2.77e-10	4.11e-06	-0.0200753
327 Oligo NN	Ctnna3	1.4e-13	2.09e-09	-0.0081918
327 Oligo NN	Ank3	2.38e-29	3.61e-25	-0.0126784
327 Oligo NN	Fam13c	2.5e-12	3.73e-08	-0.0200312
327 Oligo NN	Phyhipl	7.31e-11	1.09e-06	-0.017891
327 Oligo NN	Ube2d1	2.55e-06	0.0369705	-0.0098911
327 Oligo NN	Cisd1	1.81e-07	0.00264739	0.0148334
327 Oligo NN	Pdxk	1.34e-09	1.98e-05	-0.0365919
327 Oligo NN	Gpx4	3.4e-59	5.18e-55	0.0297789
327 Oligo NN	Atp5f1d	5.45e-07	0.00795597	0.0139441
327 Oligo NN	Ndufs7	1.43e-14	2.15e-10	0.0197574
327 Oligo NN	Gamt	1.44e-11	2.15e-07	-0.0231972
327 Oligo NN	Rps15	3.11e-10	4.62e-06	0.0123221
327 Oligo NN	Hsp90b1	1.28e-11	1.91e-07	0.0175232
327 Oligo NN	Ano4	5.43e-14	8.14e-10	-0.0091014
327 Oligo NN	Anks1b	3.23e-37	4.91e-33	-0.0231477
327 Oligo NN	Gm20110	3.21e-06	0.0466044	0.117866
327 Oligo NN	Ppfia2	4.76e-08	0.00070086	-0.0194853
327 Oligo NN	Nav3	2.66e-40	4.04e-36	0.0376059
327 Oligo NN	Phlda1	2.19e-08	0.00032333	-0.0462628
327 Oligo NN	Cpsf6	2.79e-06	0.0405183	-0.0121836
327 Oligo NN	Erbb3	2.31e-09	3.41e-05	-0.0201683
327 Oligo NN	Pla2g3	6.2e-34	9.42e-30	0.0578048
327 Oligo NN	Selenom	7.01e-60	1.07e-55	0.0390854
327 Oligo NN	Gal3st1	6.33e-11	9.41e-07	-0.0159307
327 Oligo NN	Ppia	1.37e-38	2.08e-34	0.0170085
327 Oligo NN	Ddc	1.3e-08	0.00019253	0.0235053
327 Oligo NN	Mdh1	5.83e-08	0.00085767	0.0130843
327 Oligo NN	Rps27a	1.05e-18	1.59e-14	0.0175474
327 Oligo NN	Ccnjl	9.66e-09	0.00014268	-0.0417294
327 Oligo NN	Rack1	5.04e-08	0.00074138	0.0154857
327 Oligo NN	Sqstm1	2.49e-08	0.00036692	0.0142929
327 Oligo NN	Adamts2	1.72e-23	2.61e-19	-0.0569508
327 Oligo NN	Cdc42se2	9.13e-08	0.00134093	-0.016456
327 Oligo NN	Hint1	1.06e-11	1.58e-07	0.0155219
327 Oligo NN	Sparc	2.62e-45	3.98e-41	0.0470273
327 Oligo NN	H2bc27	4.35e-40	6.61e-36	-0.0653569
327 Oligo NN	Tom1l2	1.14e-06	0.0165833	-0.0119089
327 Oligo NN	Llgl1	4.85e-07	0.00708113	-0.017534
327 Oligo NN	Ubb	2.63e-26	3.98e-22	0.0131047
327 Oligo NN	Rpl26	3.46e-17	5.21e-13	0.0192956
327 Oligo NN	Kdm6b	7.33e-09	0.00010835	-0.0594977
327 Oligo NN	Efnb3	7.05e-09	0.00010424	-0.0109087
327 Oligo NN	Psmb6	7.59e-07	0.0110796	0.0142243
327 Oligo NN	Gm12326	1.31e-12	1.96e-08	-0.032971
327 Oligo NN	Wscd1	3.69e-10	5.47e-06	-0.0122205
327 Oligo NN	Aspa	2.61e-16	3.92e-12	-0.0092405
327 Oligo NN	Rffl	1.98e-06	0.0287809	-0.0094152
327 Oligo NN	Wfdc18	9.46e-13	1.41e-08	-0.0450274
327 Oligo NN	Acaca	3.22e-37	4.89e-33	0.0216884
327 Oligo NN	Usp32	1.07e-07	0.00157372	-0.0151132
327 Oligo NN	Vmp1	7.4e-10	1.1e-05	-0.0068188
327 Oligo NN	Ypel2	2.39e-10	3.55e-06	-0.0099096
327 Oligo NN	Septin4	2.99e-31	4.53e-27	-0.0134083
327 Oligo NN	Nme2	1.19e-08	0.00017612	0.0192298
327 Oligo NN	Nme1	2.39e-06	0.0346499	0.0174148
[truncated: 376 more rows]

## Sheet: MGI symbol change list
old symbol	MGI Gene/Marker ID	Symbol	Name
0610012G03Rik	MGI:1913301	Ncbp2as2	Ncbp2 antisense 2 (head to head)
1110008P14Rik	MGI:1920987	Bbln	bublin coiled coil protein
4930402H24Rik	MGI:1923029	Dnaaf9	dynein axonemal assembly factor 9
AI413582	MGI:2146839	Smim29	small integral membrane protein 29
Atp5a1	MGI:88115	Atp5f1a	ATP synthase F1 subunit alpha
Atp5b	MGI:107801	Atp5f1b	ATP synthase F1 subunit beta
Atp5c1	MGI:1261437	Atp5f1c	ATP synthase F1 subunit gamma
Atp5d	MGI:1913293	Atp5f1d	ATP synthase F1 subunit delta
Atp5e	MGI:1855697	Atp5f1e	ATP synthase F1 subunit epsilon
Atp5f1	MGI:1100495	Atp5pb	ATP synthase peripheral stalk-membrane subunit b
Atp5g1	MGI:107653	Atp5mc1	ATP synthase membrane subunit c locus 1
Atp5g2	MGI:1915192	Atp5mc2	ATP synthase membrane subunit c locus 2
Atp5g3	MGI:2442035	Atp5mc3	ATP synthase membrane subunit c locus 3
Atp5h	MGI:1918929	Atp5pd	ATP synthase peripheral stalk subunit d
Atp5j	MGI:107777	Atp5pf	ATP synthase peripheral stalk subunit F6
Atp5j2	MGI:1927558	Atp5mf	ATP synthase membrane subunit f
Atp5k	MGI:106636	Atp5me	ATP synthase membrane subunit e
Atp5l	MGI:1351597	Atp5mg	ATP synthase membrane subunit g
Atp5md	MGI:1891435	Atp5mk	ATP synthase membrane subunit k
Atp5mpl	MGI:1917507	Atp5mj	ATP synthase membrane subunit j
Atp5o	MGI:106341	Atp5po	ATP synthase peripheral stalk subunit OSCP
Atpif1	MGI:1196457	Atp5if1	ATP synthase inhibitory factor subunit 1
Ctps	MGI:1858304	Ctps1	cytidine 5'-triphosphate synthase 1
Fam102a	MGI:2138935	Eeig1	estrogen-induced osteoclastogenesis regulator 1
Fam173a	MGI:2384888	Antkmt	adenine nucleotide translocase lysine methyltransferase
Fam189a1	MGI:1917888	Entrep2	endosomal transmembrane epsin interactor 2
Fam189a2	MGI:2685813	Entrep1	endosomal transmembrane epsin interactor 1
Gm10125	MGI:3642044	Zeb1os1	zinc finger E-box binding homeobox 1, opposite strand 1
Gm16286	MGI:3833940	Naa12	N(alpha)-acetyltransferase 12, NatA catalytic subunit
Gm1673	MGI:2686519	Nicol1	NELL2 interacting cell ontogeny regulator 1
Gm17018	MGI:1924407	Dpcd	deleted in primary ciliary dyskinesia
Gm2115	MGI:3780284	Ctxnd1	cortexin domain containing 1
Gm37494	MGI:5593148	Gm33989	predicted gene, 33989
Gm42418	MGI:107222	Rn18s-rs5	18s RNA, related sequence 5
Gm597	MGI:2685443	Spata31e5	spermatogenesis associated 31 subfamily E member 5
Gramd3	MGI:1914815	Gramd2b	GRAM domain containing 2B
H2afj	MGI:3606192	H2aj	H2J.A histone
H2afz	MGI:1888388	H2az1	H2A.Z variant histone 1
Hist1h1c	MGI:1931526	H1f2	H1.2 linker histone, cluster member
Hist1h2bc	MGI:1915274	H2bc4	H2B clustered histone 4
Hist3h2ba	MGI:1925553	H2bc27	H2B clustered histone 27
Ick	MGI:1934157	Cilk1	ciliogenesis associated kinase 1
Marc2	MGI:1914497	Mtarc2	mitochondrial amidoxime reducing component 2
March1	MGI:1920175	Marchf1	membrane associated ring-CH-type finger 1
Mettl7a1	MGI:1916523	Tmt1a	thiol methyltransferase 1A1
Ndufa4	MGI:107686	Coxfa4	cytochrome c oxidase associated subunit FA4
Ndufb1-ps	MGI:3780865	Ndufb1	NADH:ubiquinone oxidoreductase subunit B1
Olfr111	MGI:2177494	Or5v1b	olfactory receptor family 5 subfamily V member 1B
Pak7	MGI:1920334	Pak5	p21 (RAC1) activated kinase 5
Pnmal2	MGI:3645856	Pnma8b	PNMA family member 8B
Qk	MGI:97837	Qki	quaking, KH domain containing RNA binding
Sars	MGI:102809	Sars1	seryl-tRNA synthetase 1
Sept4	MGI:1270156	Septin4	septin 4
Sept7	MGI:1335094	Septin7	septin 7
Skp1a	MGI:103575	Skp1	S-phase kinase-associated protein 1
Slc9a3r2	MGI:1890662	Nherf2	NHERF family PDZ scaffold protein 2
Tmem88b	MGI:2444329	Tmem278	transmembrane protein 278
