# Supplementary material for: Single-nucleus multiomic profiling of the aging mouse substantia nigra reveals conserved gene alterations linked to Parkinson's disease
Source: HighWire-hosted journal article supplement (doi:10.1101/gr.281113.125), 2026-04
Supplement: Supplemental_Table_S3.xlsx [file Supplemental_Table_S3.xlsx]

## Sheet: Supplemental_Table_S3
Supplemental Table S3: GO and KEGG pathway enrichment analysis of the age-associated DEGs in oligodendrocytes
DEG group	Group name	Database	Category	ID	Description	GeneRatio	BackgroundRatio	p-value	p-adjust	Gene EntrezID
C1	Late-up	GO	BP	GO:0002181	cytoplasmic translation	47/229	128/17275	4.17e-56	1.2e-52	14109/269261/270106/22121/67115/319195/19899/76808/19921/19933/65019/68193/19941/19942/26451/19946/19951/100503670/19988/19989/27176/26961/20005/11837/56040/67186/67097/27207/20042/20044/20054/267019/20055/16898/66481/66475/20088/78294/54127/27050/20091/20103/20104/20115/20116/76846/16785
C1	Late-up	GO	BP	GO:0140236	translation at presynapse	28/229	45/17275	4.45e-42	6.41e-39	269261/270106/22121/67115/319195/65019/68193/19941/19942/26451/19951/100503670/19988/19989/27176/26961/20005/67186/67097/27207/20042/20044/267019/20055/20088/78294/54127/20103
C1	Late-up	GO	BP	GO:0140241	translation at synapse	28/229	46/17275	1.13e-41	8.1e-39	269261/270106/22121/67115/319195/65019/68193/19941/19942/26451/19951/100503670/19988/19989/27176/26961/20005/67186/67097/27207/20042/20044/267019/20055/20088/78294/54127/20103
C1	Late-up	GO	BP	GO:0140242	translation at postsynapse	28/229	46/17275	1.13e-41	8.1e-39	269261/270106/22121/67115/319195/65019/68193/19941/19942/26451/19951/100503670/19988/19989/27176/26961/20005/67186/67097/27207/20042/20044/267019/20055/20088/78294/54127/20103
C1	Late-up	GO	BP	GO:0042254	ribosome biogenesis	30/229	296/17275	3.72e-18	2.14e-15	14109/69902/67134/117109/67115/68193/19941/19942/100503670/19988/19989/27176/11837/27207/20042/20044/20054/267019/20055/66481/66475/20088/54127/20091/20103/20104/20115/20116/76846/16785
C1	Late-up	GO	BP	GO:0022613	ribonucleoprotein complex biogenesis	33/229	403/17275	4.51e-17	2.1e-14	14109/15519/69902/67134/117109/22121/67115/68193/19941/19942/100503670/19988/19989/27176/11837/27207/20042/20044/20054/267019/20055/66481/66475/20088/54127/20091/20103/20104/20115/20116/76846/16785/27981
C1	Late-up	GO	BP	GO:0042274	ribosomal small subunit biogenesis	19/229	100/17275	5.12e-17	2.1e-14	14109/67134/27207/20042/20044/20054/267019/20055/66481/66475/20088/54127/20091/20103/20104/20115/20116/76846/16785
C1	Late-up	GO	BP	GO:0042255	ribosome assembly	12/229	59/17275	1.43e-11	5.13e-09	14109/69902/68193/100503670/19988/11837/20044/20054/54127/20103/20104/16785
C1	Late-up	GO	BP	GO:0006119	oxidative phosphorylation	13/229	107/17275	1.67e-09	5.35e-07	14004/12857/66445/69875/67184/68342/66046/67264/66218/75406/72900/68943/66576
C1	Late-up	GO	BP	GO:0000028	ribosomal small subunit assembly	7/229	19/17275	2.89e-09	8.31e-07	14109/20044/20054/54127/20103/20104/16785
C1	Late-up	GO	BP	GO:0022618	protein-RNA complex assembly	15/229	159/17275	3.25e-09	8.51e-07	14109/15519/69902/22121/68193/100503670/19988/11837/20044/20054/54127/20103/20104/16785/27981
C1	Late-up	GO	BP	GO:0071826	protein-RNA complex organization	15/229	167/17275	6.4e-09	1.53e-06	14109/15519/69902/22121/68193/100503670/19988/11837/20044/20054/54127/20103/20104/16785/27981
C1	Late-up	GO	BP	GO:0045333	cellular respiration	16/229	195/17275	7.33e-09	1.62e-06	14004/52637/12857/66445/14555/17449/69875/67184/68342/66046/67264/66218/75406/72900/68943/66576
C1	Late-up	GO	BP	GO:0009060	aerobic respiration	14/229	148/17275	1.06e-08	2.05e-06	14004/12857/66445/17449/69875/67184/68342/66046/67264/66218/75406/72900/68943/66576
C1	Late-up	GO	BP	GO:0009206	purine ribonucleoside triphosphate biosynthetic process	11/229	82/17275	1.07e-08	2.05e-06	11674/69875/67184/68342/66046/67264/66218/75406/72900/18102/18103
C1	Late-up	GO	BP	GO:0009145	purine nucleoside triphosphate biosynthetic process	11/229	83/17275	1.22e-08	2.14e-06	11674/69875/67184/68342/66046/67264/66218/75406/72900/18102/18103
C1	Late-up	GO	BP	GO:0009205	purine ribonucleoside triphosphate metabolic process	13/229	126/17275	1.26e-08	2.14e-06	11674/15481/69875/67184/68342/66046/67264/66218/75406/72900/18102/18103/12257
C1	Late-up	GO	BP	GO:0006364	rRNA processing	16/229	204/17275	1.4e-08	2.23e-06	69902/117109/67115/19941/19942/100503670/19989/27176/20054/20055/66481/20088/54127/20104/20115/20116
C1	Late-up	GO	BP	GO:0009201	ribonucleoside triphosphate biosynthetic process	11/229	85/17275	1.58e-08	2.39e-06	11674/69875/67184/68342/66046/67264/66218/75406/72900/18102/18103
C1	Late-up	GO	BP	GO:0009199	ribonucleoside triphosphate metabolic process	13/229	129/17275	1.68e-08	2.42e-06	11674/15481/69875/67184/68342/66046/67264/66218/75406/72900/18102/18103/12257
C1	Late-up	GO	BP	GO:0009144	purine nucleoside triphosphate metabolic process	13/229	135/17275	2.92e-08	4e-06	11674/15481/69875/67184/68342/66046/67264/66218/75406/72900/18102/18103/12257
C1	Late-up	GO	BP	GO:0009142	nucleoside triphosphate biosynthetic process	11/229	91/17275	3.26e-08	4.26e-06	11674/69875/67184/68342/66046/67264/66218/75406/72900/18102/18103
C1	Late-up	GO	BP	GO:0015986	proton motive force-driven ATP synthesis	8/229	41/17275	5.53e-08	6.63e-06	69875/67184/68342/66046/67264/66218/75406/72900
C1	Late-up	GO	BP	GO:0042776	proton motive force-driven mitochondrial ATP synthesis	8/229	41/17275	5.53e-08	6.63e-06	69875/67184/68342/66046/67264/66218/75406/72900
C1	Late-up	GO	BP	GO:0009141	nucleoside triphosphate metabolic process	13/229	146/17275	7.44e-08	8.56e-06	11674/15481/69875/67184/68342/66046/67264/66218/75406/72900/18102/18103/12257
C1	Late-up	GO	BP	GO:0016072	rRNA metabolic process	16/229	231/17275	8e-08	8.85e-06	69902/117109/67115/19941/19942/100503670/19989/27176/20054/20055/66481/20088/54127/20104/20115/20116
C1	Late-up	GO	BP	GO:0046034	ATP metabolic process	11/229	103/17275	1.2e-07	1.27e-05	11674/15481/69875/67184/68342/66046/67264/66218/75406/72900/12257
C1	Late-up	GO	BP	GO:0042773	ATP synthesis coupled electron transport	9/229	64/17275	1.58e-07	1.57e-05	14004/12857/66445/67264/66218/75406/72900/68943/66576
C1	Late-up	GO	BP	GO:0042775	mitochondrial ATP synthesis coupled electron transport	9/229	64/17275	1.58e-07	1.57e-05	14004/12857/66445/67264/66218/75406/72900/68943/66576
C1	Late-up	GO	BP	GO:0022904	respiratory electron transport chain	10/229	85/17275	1.81e-07	1.73e-05	14004/12857/66445/14555/67264/66218/75406/72900/68943/66576
C1	Late-up	GO	BP	GO:0006091	generation of precursor metabolites and energy	20/229	389/17275	2.58e-07	2.39e-05	30956/11674/14004/52637/12857/66445/74747/14433/14555/17449/69875/67184/68342/66046/67264/66218/75406/72900/68943/66576
C1	Late-up	GO	BP	GO:0042273	ribosomal large subunit biogenesis	9/229	68/17275	2.7e-07	2.43e-05	69902/67115/68193/19941/100503670/19988/19989/27176/11837
C1	Late-up	GO	BP	GO:0072521	purine-containing compound metabolic process	20/229	391/17275	2.8e-07	2.44e-05	107476/11674/67880/14555/15254/15481/107227/17449/69875/67184/68342/66046/67264/66218/75406/72900/18102/18103/27273/12257
C1	Late-up	GO	BP	GO:0006163	purine nucleotide metabolic process	19/229	361/17275	3.64e-07	3.08e-05	107476/11674/67880/14555/15254/15481/17449/69875/67184/68342/66046/67264/66218/75406/72900/18102/18103/27273/12257
C1	Late-up	GO	BP	GO:0006754	ATP biosynthetic process	9/229	71/17275	3.94e-07	3.24e-05	11674/69875/67184/68342/66046/67264/66218/75406/72900
C1	Late-up	GO	BP	GO:0019646	aerobic electron transport chain	8/229	53/17275	4.48e-07	3.58e-05	12857/66445/67264/66218/75406/72900/68943/66576
C1	Late-up	GO	BP	GO:0022900	electron transport chain	10/229	94/17275	4.71e-07	3.66e-05	14004/12857/66445/14555/67264/66218/75406/72900/68943/66576
C1	Late-up	GO	BP	GO:0009117	nucleotide metabolic process	20/229	405/17275	4.88e-07	3.7e-05	107476/11674/67880/14555/15254/15481/17449/246703/69875/67184/68342/66046/67264/66218/75406/72900/18102/18103/27273/12257
C1	Late-up	GO	BP	GO:2001242	regulation of intrinsic apoptotic signaling pathway	13/229	173/17275	5.38e-07	3.97e-05	107771/64209/67184/68943/72287/268373/14694/19941/27050/20115/110213/22070/22187
C1	Late-up	GO	BP	GO:0006753	nucleoside phosphate metabolic process	20/229	413/17275	6.64e-07	4.78e-05	107476/11674/67880/14555/15254/15481/17449/246703/69875/67184/68342/66046/67264/66218/75406/72900/18102/18103/27273/12257
C1	Late-up	GO	BP	GO:0009150	purine ribonucleotide metabolic process	16/229	272/17275	7.34e-07	5.15e-05	107476/11674/15254/15481/69875/67184/68342/66046/67264/66218/75406/72900/18102/18103/27273/12257
C1	Late-up	GO	BP	GO:0055086	nucleobase-containing small molecule metabolic process	21/229	463/17275	9.98e-07	6.84e-05	107476/11674/67880/14555/15254/15481/107227/17449/246703/69875/67184/68342/66046/67264/66218/75406/72900/18102/18103/27273/12257
C1	Late-up	GO	BP	GO:0015980	energy derivation by oxidation of organic compounds	16/229	279/17275	1.03e-06	6.87e-05	14004/52637/12857/66445/14555/17449/69875/67184/68342/66046/67264/66218/75406/72900/68943/66576
C1	Late-up	GO	BP	GO:0009152	purine ribonucleotide biosynthetic process	12/229	155/17275	1.08e-06	7.07e-05	11674/69875/67184/68342/66046/67264/66218/75406/72900/18102/18103/27273
C1	Late-up	GO	BP	GO:0009259	ribonucleotide metabolic process	16/229	288/17275	1.56e-06	9.96e-05	107476/11674/15254/15481/69875/67184/68342/66046/67264/66218/75406/72900/18102/18103/27273/12257
C1	Late-up	GO	BP	GO:0097193	intrinsic apoptotic signaling pathway	16/229	292/17275	1.86e-06	0.000114501	107771/12575/74747/64209/15254/67184/68943/72287/268373/14694/19941/27050/20115/110213/22070/22187
C1	Late-up	GO	BP	GO:1901798	positive regulation of signal transduction by p53 class mediator	6/229	29/17275	1.87e-06	0.000114501	107771/65019/19941/20054/20115/22187
C1	Late-up	GO	BP	GO:0019693	ribose phosphate metabolic process	16/229	293/17275	1.95e-06	0.000115276	107476/11674/15254/15481/69875/67184/68342/66046/67264/66218/75406/72900/18102/18103/27273/12257
C1	Late-up	GO	BP	GO:0009260	ribonucleotide biosynthetic process	12/229	164/17275	1.96e-06	0.000115276	11674/69875/67184/68342/66046/67264/66218/75406/72900/18102/18103/27273
C1	Late-up	GO	BP	GO:0046390	ribose phosphate biosynthetic process	12/229	168/17275	2.53e-06	0.000145452	11674/69875/67184/68342/66046/67264/66218/75406/72900/18102/18103/27273
C1	Late-up	GO	BP	GO:2001233	regulation of apoptotic signaling pathway	18/229	378/17275	3.11e-06	0.000175248	107771/13036/14870/64209/16410/67184/68943/72287/268373/14694/19941/27050/20115/170755/11739/110213/22070/22187
C1	Late-up	GO	BP	GO:0010257	NADH dehydrogenase complex assembly	7/229	50/17275	4.04e-06	0.000219149	69875/67184/68342/66046/67264/66218/75406
C1	Late-up	GO	BP	GO:0032981	mitochondrial respiratory chain complex I assembly	7/229	50/17275	4.04e-06	0.000219149	69875/67184/68342/66046/67264/66218/75406
C1	Late-up	GO	BP	GO:1902255	positive regulation of intrinsic apoptotic signaling pathway by p53 class mediator	4/229	10/17275	5.93e-06	0.000316137	107771/19941/20115/22187
C1	Late-up	GO	BP	GO:0006749	glutathione metabolic process	7/229	54/17275	6.84e-06	0.000351933	625249/76263/14862/14866/14867/68312/14870
C1	Late-up	GO	BP	GO:0006164	purine nucleotide biosynthetic process	12/229	185/17275	6.85e-06	0.000351933	11674/69875/67184/68342/66046/67264/66218/75406/72900/18102/18103/27273
C1	Late-up	GO	BP	GO:0031396	regulation of protein ubiquitination	12/229	190/17275	8.99e-06	0.000453719	64209/15519/68943/268373/65019/100503670/16898/27050/20115/18412/12257/22187
C1	Late-up	GO	BP	GO:0072522	purine-containing compound biosynthetic process	12/229	192/17275	1e-05	0.000495857	11674/69875/67184/68342/66046/67264/66218/75406/72900/18102/18103/27273
C1	Late-up	GO	BP	GO:0000027	ribosomal large subunit assembly	5/229	23/17275	1.09e-05	0.000520293	69902/68193/100503670/19988/11837
C1	Late-up	GO	BP	GO:0006120	mitochondrial electron transport, NADH to ubiquinone	5/229	23/17275	1.09e-05	0.000520293	67264/66218/75406/72900/68943
C1	Late-up	GO	BP	GO:0034470	ncRNA processing	17/229	386/17275	1.63e-05	0.000765902	69902/117109/67115/19941/19942/100503670/19989/27176/20054/20055/66481/20088/54127/20104/20115/20116/22099
C1	Late-up	GO	BP	GO:0072331	signal transduction by p53 class mediator	10/229	139/17275	1.65e-05	0.000765902	107771/12575/74747/15254/65019/19941/100503670/20054/20115/22187
C1	Late-up	GO	BP	GO:2001244	positive regulation of intrinsic apoptotic signaling pathway	7/229	64/17275	2.15e-05	0.000979746	107771/72287/14694/19941/27050/20115/22187
C1	Late-up	GO	BP	GO:0009165	nucleotide biosynthetic process	12/229	213/17275	2.82e-05	0.00126761	11674/69875/67184/68342/66046/67264/66218/75406/72900/18102/18103/27273
C1	Late-up	GO	BP	GO:1901293	nucleoside phosphate biosynthetic process	12/229	215/17275	3.09e-05	0.0013683	11674/69875/67184/68342/66046/67264/66218/75406/72900/18102/18103/27273
C1	Late-up	GO	BP	GO:0009636	response to toxic substance	9/229	120/17275	3.16e-05	0.00137583	13195/13849/14866/68312/17748/68943/330260/18477/19765
C1	Late-up	GO	BP	GO:0044283	small molecule biosynthetic process	19/229	494/17275	3.39e-05	0.00145632	30956/107476/11674/11816/12411/13244/13849/74155/16592/14433/14555/68312/14870/17449/27273/236539/237625/107272/19215
C1	Late-up	GO	BP	GO:0006959	humoral immune response	10/229	153/17275	3.78e-05	0.0016007	12010/12259/12260/12268/12520/14109/14433/14964/16019/19946
C1	Late-up	GO	BP	GO:0031397	negative regulation of protein ubiquitination	7/229	71/17275	4.25e-05	0.00177044	268373/65019/100503670/27050/20115/18412/12257
C1	Late-up	GO	BP	GO:0046394	carboxylic acid biosynthetic process	13/229	261/17275	4.75e-05	0.00195096	30956/107476/12411/13244/74155/16592/68312/14870/27273/236539/237625/107272/19215
C1	Late-up	GO	BP	GO:1903320	regulation of protein modification by small protein conjugation or removal	12/229	225/17275	4.82e-05	0.00195225	64209/15519/68943/268373/65019/100503670/16898/27050/20115/18412/12257/22187
C1	Late-up	GO	BP	GO:0016053	organic acid biosynthetic process	13/229	264/17275	5.34e-05	0.00213262	30956/107476/12411/13244/74155/16592/68312/14870/27273/236539/237625/107272/19215
C1	Late-up	GO	BP	GO:0090407	organophosphate biosynthetic process	18/229	475/17275	6.63e-05	0.00261335	11674/67880/16592/14433/14555/17449/69875/67184/68342/66046/67264/66218/75406/72900/18102/18103/27273/225845
C1	Late-up	GO	BP	GO:1901796	regulation of signal transduction by p53 class mediator	7/229	77/17275	7.18e-05	0.00279103	107771/65019/19941/100503670/20054/20115/22187
C1	Late-up	GO	BP	GO:0072593	reactive oxygen species metabolic process	11/229	203/17275	8.64e-05	0.00331317	12411/12575/12955/67880/74747/14870/67184/27273/68943/18477/12257
C1	Late-up	GO	BP	GO:1903321	negative regulation of protein modification by small protein conjugation or removal	7/229	81/17275	9.93e-05	0.00375738	268373/65019/100503670/27050/20115/18412/12257
C1	Late-up	GO	BP	GO:0033108	mitochondrial respiratory chain complex assembly	7/229	83/17275	0.000115893	0.00427466	69875/67184/68342/66046/67264/66218/75406
C1	Late-up	GO	BP	GO:0072332	intrinsic apoptotic signaling pathway by p53 class mediator	7/229	83/17275	0.000115893	0.00427466	107771/12575/74747/15254/19941/20115/22187
C1	Late-up	GO	BP	GO:1901874	negative regulation of post-translational protein modification	7/229	87/17275	0.000155969	0.00568005	268373/65019/100503670/27050/20115/18412/12257
C1	Late-up	GO	BP	GO:2001234	negative regulation of apoptotic signaling pathway	11/229	223/17275	0.000197686	0.00710927	14870/64209/16410/67184/68943/268373/14694/170755/11739/110213/22070
C1	Late-up	GO	BP	GO:0033559	unsaturated fatty acid metabolic process	7/229	92/17275	0.000221126	0.00785407	13849/16592/625249/68312/14870/237625/19215
C1	Late-up	GO	BP	GO:1901873	regulation of post-translational protein modification	12/229	266/17275	0.000234026	0.00821089	64209/15519/68943/268373/65019/100503670/16898/27050/20115/18412/12257/22187
C1	Late-up	GO	BP	GO:0006457	protein folding	9/229	157/17275	0.000250201	0.00867264	12010/12955/14227/15519/15516/22027/15481/14976/268373
C1	Late-up	GO	BP	GO:1904667	negative regulation of ubiquitin protein ligase activity	3/229	10/17275	0.000257557	0.00878252	65019/100503670/20115
C1	Late-up	GO	BP	GO:0042026	protein refolding	4/229	24/17275	0.000259477	0.00878252	12010/12955/15519/15481
C1	Late-up	GO	BP	GO:0046184	aldehyde biosynthetic process	4/229	25/17275	0.000305707	0.010227	11674/14433/14555/17449
C1	Late-up	GO	BP	GO:2001243	negative regulation of intrinsic apoptotic signaling pathway	7/229	98/17275	0.000326567	0.0107992	64209/67184/68943/268373/14694/110213/22070
C1	Late-up	GO	BP	GO:0031647	regulation of protein stability	12/229	277/17275	0.000338521	0.0110673	12520/12955/13036/13135/14433/15519/15516/15481/68943/65019/100503670/20115
C1	Late-up	GO	BP	GO:0046166	glyceraldehyde-3-phosphate biosynthetic process	3/229	11/17275	0.00035068	0.0112101	14433/14555/17449
C1	Late-up	GO	BP	GO:1905907	negative regulation of amyloid fibril formation	3/229	11/17275	0.00035068	0.0112101	11816/12955/14976
C1	Late-up	GO	BP	GO:1990000	amyloid fibril formation	4/229	26/17275	0.000357557	0.0113043	11816/12010/12955/14976
C1	Late-up	GO	BP	GO:0140694	non-membrane-bounded organelle assembly	14/229	363/17275	0.000361842	0.0113154	14109/69902/68193/100503670/19988/11837/20044/20054/66475/54127/27050/20103/20104/16785
C1	Late-up	GO	BP	GO:0006633	fatty acid biosynthetic process	8/229	134/17275	0.000419944	0.0129912	107476/13244/16592/68312/14870/27273/237625/19215
C1	Late-up	GO	BP	GO:0007263	nitric oxide mediated signal transduction	4/229	28/17275	0.000479634	0.0146799	11816/12411/14433/17748
C1	Late-up	GO	BP	GO:0072330	monocarboxylic acid biosynthetic process	9/229	183/17275	0.00076463	0.0231562	107476/13244/74155/16592/68312/14870/27273/237625/19215
C1	Late-up	GO	BP	GO:2001235	positive regulation of apoptotic signaling pathway	8/229	147/17275	0.000775511	0.0232411	107771/13036/72287/14694/19941/27050/20115/22187
C1	Late-up	GO	BP	GO:0019730	antimicrobial humoral response	6/229	85/17275	0.000929216	0.0267515	12010/14109/14433/14964/16019/19946
C1	Late-up	GO	BP	GO:0009070	serine family amino acid biosynthetic process	3/229	15/17275	0.000929841	0.0267515	12411/236539/107272
C1	Late-up	GO	BP	GO:0019682	glyceraldehyde-3-phosphate metabolic process	3/229	15/17275	0.000929841	0.0267515	14433/14555/17449
C1	Late-up	GO	BP	GO:1905906	regulation of amyloid fibril formation	3/229	15/17275	0.000929841	0.0267515	11816/12955/14976
C1	Late-up	GO	BP	GO:0006414	translational elongation	5/229	58/17275	0.00101385	0.0288796	55949/66656/14694/56040/67186
C1	Late-up	GO	BP	GO:1902253	regulation of intrinsic apoptotic signaling pathway by p53 class mediator	4/229	35/17275	0.00114074	0.0321755	107771/19941/20115/22187
C1	Late-up	GO	BP	GO:0031109	microtubule polymerization or depolymerization	7/229	122/17275	0.00121032	0.0338068	12955/27050/20393/56471/67971/22142/22153
C1	Late-up	GO	BP	GO:0048662	negative regulation of smooth muscle cell proliferation	5/229	61/17275	0.00127474	0.0349278	11815/11816/12575/14870/29811
C1	Late-up	GO	BP	GO:0098754	detoxification	5/229	61/17275	0.00127474	0.0349278	14866/68312/17748/18477/19765
C1	Late-up	GO	BP	GO:0022411	cellular component disassembly	14/229	416/17275	0.00136122	0.0366407	107771/12259/12260/74747/15481/68943/225845/65019/20393/11739/18412/56471/12257/22320
C1	Late-up	GO	BP	GO:0051131	chaperone-mediated protein complex assembly	3/229	17/17275	0.00136272	0.0366407	74318/15519/14976
C1	Late-up	GO	BP	GO:0042178	xenobiotic catabolic process	3/229	18/17275	0.00161936	0.0427422	14862/14866/68312
C1	Late-up	GO	BP	GO:0051444	negative regulation of ubiquitin-protein transferase activity	3/229	18/17275	0.00161936	0.0427422	65019/100503670/20115
C1	Late-up	GO	BP	GO:0031400	negative regulation of protein modification process	14/229	425/17275	0.00166255	0.0434833	11816/12575/52840/74155/14870/66277/268373/14694/65019/100503670/27050/20115/18412/12257
C1	Late-up	GO	BP	GO:0006690	icosanoid metabolic process	6/229	96/17275	0.00174639	0.0448635	13849/16592/625249/14870/237625/19215
C1	Late-up	GO	BP	GO:0071466	cellular response to xenobiotic stimulus	7/229	130/17275	0.00174651	0.0448635	383619/107771/14862/14866/68312/14870/68458
C1	Late-up	GO	BP	GO:0002443	leukocyte mediated immunity	12/229	337/17275	0.00186005	0.0469417	12010/12259/12260/12268/12520/13036/14964/16019/237625/18477/19215/22320
C1	Late-up	GO	BP	GO:0006979	response to oxidative stress	12/229	337/17275	0.00186005	0.0469417	11815/11816/14004/12955/625249/14870/68943/268373/18477/14694/27050/18412
C1	Late-up	GO	BP	GO:0002455	humoral immune response mediated by circulating immunoglobulin	4/229	40/17275	0.00189079	0.0471598	12259/12260/12520/16019
C1	Late-up	GO	BP	GO:0045861	negative regulation of proteolysis	10/229	250/17275	0.00190147	0.0471598	12955/64138/14433/64209/15516/209378/65019/100503670/20115/20716
C1	Late-up	GO	CC	GO:0022626	cytosolic ribosome	49/234	115/17300	5.6e-62	1.9e-59	11815/14109/269261/270106/22121/67115/319195/19899/76808/19921/19933/65019/68193/19941/19942/26451/19946/19951/100503670/19988/19989/27176/26961/20005/11837/56040/67186/67097/27207/20042/20044/20054/267019/20055/16898/66481/66475/20088/78294/54127/27050/20091/20103/20104/20115/20116/76846/16785/22187
C1	Late-up	GO	CC	GO:0044391	ribosomal subunit	50/234	184/17300	1.22e-51	2.07e-49	14109/107733/14694/269261/270106/22121/67115/319195/19899/76808/19921/19933/65019/68193/19941/19942/26451/19946/19951/100503670/19988/19989/27176/26961/20005/11837/56040/67186/67097/27207/20042/20044/20054/267019/20055/16898/66481/66475/20088/78294/54127/27050/20091/20103/20104/20115/20116/76846/16785/22187
C1	Late-up	GO	CC	GO:0005840	ribosome	51/234	230/17300	9.96e-48	1.13e-45	11815/14109/107733/14694/269261/270106/22121/67115/319195/19899/76808/19921/19933/65019/68193/19941/19942/26451/19946/19951/100503670/19988/19989/27176/26961/20005/11837/56040/67186/67097/27207/20042/20044/20054/267019/20055/16898/66481/66475/20088/78294/54127/27050/20091/20103/20104/20115/20116/76846/16785/22187
C1	Late-up	GO	CC	GO:0022625	cytosolic large ribosomal subunit	26/234	58/17300	9.45e-34	7.31e-32	269261/270106/22121/67115/319195/19899/76808/19921/19933/65019/68193/19941/19942/26451/19946/19951/100503670/19988/19989/27176/26961/20005/11837/56040/67186/20042
C1	Late-up	GO	CC	GO:0022627	cytosolic small ribosomal subunit	23/234	39/17300	1.08e-33	7.31e-32	14109/67097/27207/20042/20044/20054/267019/20055/16898/66481/66475/20088/78294/54127/27050/20091/20103/20104/20115/20116/76846/16785/22187
C1	Late-up	GO	CC	GO:0015935	small ribosomal subunit	24/234	74/17300	4.11e-27	2.32e-25	14109/14694/67097/27207/20042/20044/20054/267019/20055/16898/66481/66475/20088/78294/54127/27050/20091/20103/20104/20115/20116/76846/16785/22187
C1	Late-up	GO	CC	GO:0015934	large ribosomal subunit	27/234	115/17300	3.88e-26	1.88e-24	107733/269261/270106/22121/67115/319195/19899/76808/19921/19933/65019/68193/19941/19942/26451/19946/19951/100503670/19988/19989/27176/26961/20005/11837/56040/67186/20042
C1	Late-up	GO	CC	GO:0032040	small-subunit processome	16/234	72/17300	1.58e-15	6.68e-14	67134/27207/20042/20044/267019/20055/66475/20088/78294/54127/20091/20103/20104/20115/20116/76846
C1	Late-up	GO	CC	GO:0042788	polysomal ribosome	12/234	31/17300	3.18e-15	1.2e-13	19899/76808/19921/68193/19946/19951/19988/27176/26961/66481/66475/54127
C1	Late-up	GO	CC	GO:0005844	polysome	15/234	65/17300	6.74e-15	2.28e-13	19899/76808/19921/68193/19946/19951/19988/19989/27176/26961/66481/66475/54127/27050/20104
C1	Late-up	GO	CC	GO:0043209	myelin sheath	22/234	187/17300	9.38e-15	2.89e-13	11674/12314/12955/12934/14433/14862/15519/15481/17449/72900/18102/18103/23969/236539/268373/18477/78294/11739/22142/22153/22187/22190
C1	Late-up	GO	CC	GO:0030684	preribosome	17/234	106/17300	6.37e-14	1.8e-12	69902/67134/27207/20042/20044/267019/20055/66475/20088/78294/54127/20091/20103/20104/20115/20116/76846
C1	Late-up	GO	CC	GO:0005746	mitochondrial respirasome	11/234	70/17300	2.35e-09	6.13e-08	12857/66445/69875/67184/68342/66046/67264/66218/75406/72900/66576
C1	Late-up	GO	CC	GO:0098803	respiratory chain complex	11/234	72/17300	3.21e-09	7.77e-08	12857/66445/69875/67184/68342/66046/67264/66218/75406/72900/66576
C1	Late-up	GO	CC	GO:0070469	respirasome	11/234	77/17300	6.68e-09	1.51e-07	12857/66445/69875/67184/68342/66046/67264/66218/75406/72900/66576
C1	Late-up	GO	CC	GO:0005747	mitochondrial respiratory chain complex I	8/234	39/17300	4.26e-08	8.02e-07	69875/67184/68342/66046/67264/66218/75406/72900
C1	Late-up	GO	CC	GO:0030964	NADH dehydrogenase complex	8/234	39/17300	4.26e-08	8.02e-07	69875/67184/68342/66046/67264/66218/75406/72900
C1	Late-up	GO	CC	GO:0045271	respiratory chain complex I	8/234	39/17300	4.26e-08	8.02e-07	69875/67184/68342/66046/67264/66218/75406/72900
C1	Late-up	GO	CC	GO:1990204	oxidoreductase complex	11/234	99/17300	9.71e-08	1.73e-06	66445/14555/69875/67184/68342/66046/67264/66218/75406/72900/66576
C1	Late-up	GO	CC	GO:0098800	inner mitochondrial membrane protein complex	11/234	105/17300	1.79e-07	3.03e-06	12857/66445/69875/67184/68342/66046/67264/66218/75406/72900/66576
C1	Late-up	GO	CC	GO:0098798	mitochondrial protein-containing complex	13/234	246/17300	3.17e-05	0.000495203	12857/66445/107733/69875/67184/68342/66046/67264/66218/75406/72900/11739/66576
C1	Late-up	GO	CC	GO:0014069	postsynaptic density	16/234	359/17300	3.21e-05	0.000495203	16592/14433/15481/23969/269261/67115/76808/65019/19946/100503670/19988/19989/26961/11837/20044/27050
C1	Late-up	GO	CC	GO:0031672	A band	5/234	31/17300	5.53e-05	0.000815197	12955/319195/19988/19989/20193
C1	Late-up	GO	CC	GO:0032279	asymmetric synapse	16/234	381/17300	6.53e-05	0.000922149	16592/14433/15481/23969/269261/67115/76808/65019/19946/100503670/19988/19989/26961/11837/20044/27050
C1	Late-up	GO	CC	GO:0005743	mitochondrial inner membrane	18/234	467/17300	6.93e-05	0.000939744	12857/66445/625249/76263/107733/69875/67184/68342/66046/67264/66218/75406/72900/27273/68943/27050/11739/66576
C1	Late-up	GO	CC	GO:0099572	postsynaptic specialization	16/234	404/17300	0.000129082	0.00168303	16592/14433/15481/23969/269261/67115/76808/65019/19946/100503670/19988/19989/26961/11837/20044/27050
C1	Late-up	GO	CC	GO:0098984	neuron to neuron synapse	16/234	418/17300	0.000190309	0.00238943	16592/14433/15481/23969/269261/67115/76808/65019/19946/100503670/19988/19989/26961/11837/20044/27050
C1	Late-up	GO	CC	GO:0019774	proteasome core complex, beta-subunit complex	3/234	10/17300	0.000273296	0.00330883	26446/19172/19175
C1	Late-up	GO	CC	GO:0000323	lytic vacuole	16/234	465/17300	0.000615702	0.00691205	12010/433375/12955/13036/64138/14319/14325/14964/15516/15481/83409/17748/225845/72287/18412/22320
C1	Late-up	GO	CC	GO:0005764	lysosome	16/234	465/17300	0.000615702	0.00691205	12010/433375/12955/13036/64138/14319/14325/14964/15516/15481/83409/17748/225845/72287/18412/22320
C1	Late-up	GO	CC	GO:0044754	autolysosome	3/234	13/17300	0.000632075	0.00691205	14319/14325/18412
C1	Late-up	GO	CC	GO:0097524	sperm plasma membrane	3/234	16/17300	0.00120107	0.0127238	15519/15516/22027
C1	Late-up	GO	CC	GO:0005767	secondary lysosome	3/234	17/17300	0.00144395	0.0148333	14319/14325/18412
C1	Late-up	GO	CC	GO:0005839	proteasome core complex	3/234	19/17300	0.002017	0.0201107	26446/19172/19175
C1	Late-up	GO	CC	GO:1902495	transmembrane transporter complex	12/234	338/17300	0.00225415	0.021833	66144/12314/66445/69875/67184/68342/66046/67264/66218/75406/72900/66576
C1	Late-up	GO	CC	GO:0032587	ruffle membrane	5/234	71/17300	0.00273512	0.0253269	16410/18102/23969/27050/73723
C1	Late-up	GO	CC	GO:0030017	sarcomere	8/234	176/17300	0.00276429	0.0253269	11674/12314/12955/319195/19988/19989/20193/118449
C1	Late-up	GO	CC	GO:0070062	extracellular exosome	5/234	74/17300	0.0032754	0.02922	11674/11816/12520/12527/15481
C1	Late-up	GO	CC	GO:1990351	transporter complex	12/234	357/17300	0.00351291	0.0305353	66144/12314/66445/69875/67184/68342/66046/67264/66218/75406/72900/66576
C1	Late-up	GO	CC	GO:1903561	extracellular vesicle	5/234	82/17300	0.00508653	0.0431084	11674/11816/12520/12527/15481
C1	Late-up	GO	CC	GO:0030016	myofibril	8/234	199/17300	0.00578702	0.0478487	11674/12314/12955/319195/19988/19989/20193/118449
C1	Late-up	GO	MF	GO:0003735	structural constituent of ribosome	49/227	154/17195	5.18e-55	2.42e-52	14109/107733/269261/270106/22121/67115/319195/19899/76808/19921/19933/65019/68193/19941/19942/26451/19946/19951/100503670/19988/19989/27176/26961/20005/11837/56040/67186/67097/27207/20042/20044/20054/267019/20055/16898/66481/66475/20088/78294/54127/27050/20091/20103/20104/20115/20116/76846/16785/22187
C1	Late-up	GO	MF	GO:0019843	rRNA binding	14/227	71/17195	4.04e-13	9.44e-11	269261/319195/19921/65019/100503670/19988/19989/26961/20005/11837/27207/27050/20103/76846
C1	Late-up	GO	MF	GO:0004364	glutathione transferase activity	6/227	27/17195	1.16e-06	0.000181056	76263/14862/14866/14867/68312/14870
C1	Late-up	GO	MF	GO:0003729	mRNA binding	16/227	297/17195	2.2e-06	0.000256728	15519/22121/68193/19941/19946/100503670/19988/19989/20044/16898/27050/20091/20103/20104/20115/22099
C1	Late-up	GO	MF	GO:0048027	mRNA 5'-UTR binding	5/227	22/17195	8.41e-06	0.000641251	19941/100503670/20044/20091/20115
C1	Late-up	GO	MF	GO:0031625	ubiquitin protein ligase binding	15/227	295/17195	9.23e-06	0.000641251	12411/12575/14109/15519/15516/15481/18035/68943/65019/100503670/78294/18412/110213/22187/22190
C1	Late-up	GO	MF	GO:0016765	transferase activity, transferring alkyl or aryl (other than methyl) groups	7/227	57/17195	9.61e-06	0.000641251	76263/14862/14866/14867/68312/14870/232087
C1	Late-up	GO	MF	GO:0031386	protein tag activity	4/227	12/17195	1.35e-05	0.000699187	14109/78294/22187/22190
C1	Late-up	GO	MF	GO:0141047	molecular tag activity	4/227	12/17195	1.35e-05	0.000699187	14109/78294/22187/22190
C1	Late-up	GO	MF	GO:0044389	ubiquitin-like protein ligase binding	15/227	311/17195	1.72e-05	0.000804976	12411/12575/14109/15519/15516/15481/18035/68943/65019/100503670/78294/18412/110213/22187/22190
C1	Late-up	GO	MF	GO:0055105	ubiquitin-protein transferase inhibitor activity	4/227	13/17195	1.93e-05	0.000817764	65019/100503670/20054/20115
C1	Late-up	GO	MF	GO:0016209	antioxidant activity	7/227	67/17195	2.83e-05	0.0011003	11816/625249/76263/68312/14870/18477/20364
C1	Late-up	GO	MF	GO:0043295	glutathione binding	4/227	16/17195	4.75e-05	0.00170728	14862/14866/14867/68312
C1	Late-up	GO	MF	GO:0004602	glutathione peroxidase activity	4/227	19/17195	9.81e-05	0.00327274	625249/76263/68312/14870
C1	Late-up	GO	MF	GO:0004857	enzyme inhibitor activity	13/227	284/17195	0.000107052	0.00333287	11804/12575/56455/14433/209378/68458/14694/65019/100503670/20054/20115/20716/110213
C1	Late-up	GO	MF	GO:0140678	molecular function inhibitor activity	15/227	375/17195	0.000143986	0.0040763	11804/12314/12575/56455/14433/209378/68458/14694/65019/100503670/20054/20115/20716/110213/22320
C1	Late-up	GO	MF	GO:0048156	tau protein binding	4/227	21/17195	0.000148388	0.0040763	11816/15519/15516/20393
C1	Late-up	GO	MF	GO:0015453	oxidoreduction-driven active transmembrane transporter activity	4/227	22/17195	0.000179493	0.00441643	66445/75406/72900/66576
C1	Late-up	GO	MF	GO:0033293	monocarboxylic acid binding	6/227	63/17195	0.000179683	0.00441643	107476/16592/68312/14870/18103/19215
C1	Late-up	GO	MF	GO:0004601	peroxidase activity	5/227	43/17195	0.000245405	0.0057302	625249/76263/68312/14870/18477
C1	Late-up	GO	MF	GO:0005504	fatty acid binding	5/227	44/17195	0.000273918	0.00609142	16592/68312/14870/18103/19215
C1	Late-up	GO	MF	GO:0016684	oxidoreductase activity, acting on peroxide as acceptor	5/227	45/17195	0.000304877	0.00647172	625249/76263/68312/14870/18477
C1	Late-up	GO	MF	GO:0140662	ATP-dependent protein folding chaperone	4/227	26/17195	0.000351962	0.00714635	15519/15516/22027/15481
C1	Late-up	GO	MF	GO:0031406	carboxylic acid binding	9/227	170/17195	0.000436165	0.00848705	107476/13195/16592/68312/14870/232087/18103/268373/19215
C1	Late-up	GO	MF	GO:0055106	ubiquitin-protein transferase regulator activity	4/227	28/17195	0.000472171	0.00882015	65019/100503670/20054/20115
C1	Late-up	GO	MF	GO:0043177	organic acid binding	9/227	178/17195	0.0006086	0.0109314	107476/13195/16592/68312/14870/232087/18103/268373/19215
C1	Late-up	GO	MF	GO:0042277	peptide binding	11/227	258/17195	0.0006566	0.0113567	11816/12010/12955/14964/15516/15481/18035/14976/268373/215615/11837
C1	Late-up	GO	MF	GO:0045182	translation regulator activity	7/227	114/17195	0.000792994	0.0129168	55949/66656/20918/73830/14694/20044/76846
C1	Late-up	GO	MF	GO:0051082	unfolded protein binding	6/227	83/17195	0.000802115	0.0129168	12955/15519/15516/22027/15481/14976
C1	Late-up	GO	MF	GO:0061134	peptidase regulator activity	8/227	157/17195	0.00115672	0.0180063	383619/11804/13036/14433/209378/76477/14694/20716
C1	Late-up	GO	MF	GO:1901681	sulfur compound binding	10/227	236/17195	0.0012016	0.0181015	107476/11803/11804/11816/12411/14319/14325/14870/76477/268373
C1	Late-up	GO	MF	GO:0009055	electron transfer activity	4/227	36/17195	0.0012508	0.0182539	66445/75406/72900/66576
C1	Late-up	GO	MF	GO:0033218	amide binding	12/227	342/17195	0.00202951	0.0287206	107476/11816/12010/12955/14964/15516/15481/18035/14976/268373/215615/11837
C1	Late-up	GO	MF	GO:0030170	pyridoxal phosphate binding	4/227	48/17195	0.00365264	0.0499625	12411/52637/13195/107272
C1	Late-up	GO	MF	GO:0016769	transferase activity, transferring nitrogenous groups	3/227	24/17195	0.00374451	0.0499625	52637/14433/107272
C1	Late-up	KEGG	Amino acid metabolism	mmu00270	Cysteine and methionine metabolism - Mus musculus (house mouse)	5/147	46/6581	0.00340666	0.0381221	12411/232087/17449/236539/107272
C1	Late-up	KEGG	Cancer: overview	mmu05208	Chemical carcinogenesis - reactive oxygen species - Mus musculus (house mouse)	18/147	182/6581	9.35e-08	4.39e-06	12857/66445/13849/14862/14866/14867/68312/69875/67184/68342/66046/67264/66218/75406/72900/18035/11739/66576
C1	Late-up	KEGG	Cancer: overview	mmu05204	Chemical carcinogenesis - DNA adducts - Mus musculus (house mouse)	7/147	41/6581	2.86e-05	0.000840393	13849/76263/14862/14866/14867/68312/14870
C1	Late-up	KEGG	Cardiovascular disease	mmu05415	Diabetic cardiomyopathy - Mus musculus (house mouse)	14/147	158/6581	1e-05	0.000336303	12857/66445/14433/69875/67184/68342/66046/67264/66218/75406/72900/27273/11739/66576
C1	Late-up	KEGG	Cardiovascular disease	mmu05418	Fluid shear stress and atherosclerosis - Mus musculus (house mouse)	11/147	127/6581	0.000114598	0.00207158	12314/14862/14866/14867/68312/14870/15519/15516/22027/16410/18412
C1	Late-up	KEGG	Endocrine and metabolic disease	mmu04932	Non-alcoholic fatty liver disease - Mus musculus (house mouse)	11/147	139/6581	0.000255917	0.00375877	12857/66445/69875/67184/68342/66046/67264/66218/75406/72900/66576
C1	Late-up	KEGG	Energy metabolism	mmu00190	Oxidative phosphorylation - Mus musculus (house mouse)	12/147	97/6581	1.37e-06	5.38e-05	66144/12857/66445/69875/67184/68342/66046/67264/66218/75406/72900/66576
C1	Late-up	KEGG	Environmental adaptation	mmu04714	Thermogenesis - Mus musculus (house mouse)	12/147	188/6581	0.000959094	0.0118625	12857/66445/69875/67184/68342/66046/67264/66218/75406/72900/20104/66576
C1	Late-up	KEGG	Global and overview maps	mmu01230	Biosynthesis of amino acids - Mus musculus (house mouse)	6/147	62/6581	0.0024624	0.0289332	11674/12411/14433/232087/236539/107272
C1	Late-up	KEGG	Infectious disease: viral	mmu05171	Coronavirus disease - COVID-19 - Mus musculus (house mouse)	51/147	181/6581	2.11e-44	2.48e-42	12259/12260/12268/14109/18035/269261/270106/22121/67115/319195/19899/76808/19921/19933/65019/68193/19941/19942/26451/19946/19951/100503670/19988/19989/27176/26961/20005/11837/56040/67186/67097/27207/20042/20044/20054/267019/20055/16898/66481/66475/20088/78294/54127/27050/20091/20103/20104/20115/20116/76846/16785
C1	Late-up	KEGG	Metabolism of other amino acids	mmu00480	Glutathione metabolism - Mus musculus (house mouse)	7/147	56/6581	0.000223069	0.00349475	625249/76263/14862/14866/14867/68312/14870
C1	Late-up	KEGG	Neurodegenerative disease	mmu05012	Parkinson disease - Mus musculus (house mouse)	22/147	222/6581	2.9e-09	2.27e-07	12314/12857/66445/69875/67184/68342/66046/67264/66218/75406/72900/68943/26446/19172/19175/78294/11739/22142/22153/22187/22190/66576
C1	Late-up	KEGG	Neurodegenerative disease	mmu05020	Prion disease - Mus musculus (house mouse)	20/147	223/6581	8.85e-08	4.39e-06	12259/12260/12857/66445/15481/69875/67184/68342/66046/67264/66218/75406/72900/26446/19172/19175/11739/22142/22153/66576
C1	Late-up	KEGG	Neurodegenerative disease	mmu05022	Pathways of neurodegeneration - multiple diseases - Mus musculus (house mouse)	23/147	409/6581	3.23e-05	0.000842566	12314/12857/66445/69875/67184/68342/66046/67264/66218/75406/72900/68943/26446/19172/19175/78294/11739/18412/22142/22153/22187/22190/66576
C1	Late-up	KEGG	Neurodegenerative disease	mmu05010	Alzheimer disease - Mus musculus (house mouse)	20/147	328/6581	3.59e-05	0.000842566	11816/12314/12857/66445/14433/69875/67184/68342/66046/67264/66218/75406/72900/26446/19172/19175/11739/22142/22153/66576
C1	Late-up	KEGG	Neurodegenerative disease	mmu05016	Huntington disease - Mus musculus (house mouse)	17/147	261/6581	6.4e-05	0.00125389	12857/66445/69875/67184/68342/66046/67264/66218/75406/72900/26446/19172/19175/11739/22142/22153/66576
C1	Late-up	KEGG	Neurodegenerative disease	mmu05014	Amyotrophic lateral sclerosis - Mus musculus (house mouse)	18/147	309/6581	0.000162872	0.00273393	12857/66445/69875/67184/68342/66046/67264/66218/75406/72900/68943/26446/19172/19175/18412/22142/22153/66576
C1	Late-up	KEGG	Translation	mmu03010	Ribosome - Mus musculus (house mouse)	47/147	125/6581	1.49e-47	3.5e-45	14109/269261/270106/22121/67115/319195/19899/76808/19921/19933/65019/68193/19941/19942/26451/19946/19951/100503670/19988/19989/27176/26961/20005/11837/56040/67186/67097/27207/20042/20044/20054/267019/20055/16898/66481/66475/20088/78294/54127/27050/20091/20103/20104/20115/20116/76846/16785
C1	Late-up	KEGG	Xenobiotics biodegradation and metabolism	mmu00980	Metabolism of xenobiotics by cytochrome P450 - Mus musculus (house mouse)	7/147	43/6581	3.95e-05	0.000843909	13849/76263/14862/14866/14867/68312/14870
C1	Late-up	KEGG	Xenobiotics biodegradation and metabolism	mmu00982	Drug metabolism - cytochrome P450 - Mus musculus (house mouse)	6/147	42/6581	0.000302991	0.00405119	76263/14862/14866/14867/68312/14870
C1	Late-up	KEGG	Xenobiotics biodegradation and metabolism	mmu00983	Drug metabolism - other enzymes - Mus musculus (house mouse)	7/147	59/6581	0.000310304	0.00405119	14862/14866/14867/68312/14870/18102/18103
C2	Early-up	GO	CC	GO:0098890	extrinsic component of postsynaptic membrane	3/110	15/17300	0.000107644	0.0137562	12386/320127/223254
C2	Early-up	GO	CC	GO:0097060	synaptic membrane	11/110	466/17300	0.000186482	0.0137562	210933/320405/12564/12386/320127/223254/241263/14823/16419/383348/241568
C2	Early-up	GO	CC	GO:0019897	extrinsic component of plasma membrane	6/110	133/17300	0.000205317	0.0137562	12564/12386/320127/223254/14681/16497
C2	Early-up	GO	CC	GO:0099243	extrinsic component of synaptic membrane	3/110	29/17300	0.000810242	0.0403651	12386/320127/223254
C2	Early-up	GO	CC	GO:0045211	postsynaptic membrane	8/110	320/17300	0.00100411	0.0403651	210933/320405/12386/320127/223254/241263/383348/241568
C2	Early-up	GO	MF	GO:0030695	GTPase regulator activity	10/113	396/17195	0.000282586	0.0446486	210933/71435/11855/234094/320560/320127/105445/140580/223254/74002
C2	Early-up	GO	MF	GO:0060589	nucleoside-triphosphatase regulator activity	10/113	396/17195	0.000282586	0.0446486	210933/71435/11855/234094/320560/320127/105445/140580/223254/74002
C2	Early-up	GO	MF	GO:0031267	small GTPase binding	8/113	272/17195	0.000432029	0.0455071	11303/76441/320560/320127/105445/223254/71409/245049
C3	Late-down	GO	BP	GO:0034329	cell junction assembly	23/181	418/17275	8.34e-11	2.23e-07	11350/320873/227485/12558/76499/13048/103967/18606/13869/67703/16795/17762/58235/320840/18189/243725/14083/19266/109905/20874/56013/21872/22239
C3	Late-down	GO	BP	GO:0031346	positive regulation of cell projection organization	21/181	415/17275	2.64e-09	3.54e-06	11350/319974/101565/13048/13176/103967/18606/16590/17762/320840/18189/18479/75769/243725/19266/109905/20356/71653/75788/665113/24136
C3	Late-down	GO	BP	GO:0072659	protein localization to plasma membrane	17/181	286/17275	8.93e-09	7.97e-06	74205/11735/12558/76499/16553/16795/58998/18189/217893/18762/224624/109905/75788/83671/665113/52588/232341
C3	Late-down	GO	BP	GO:0007416	synapse assembly	14/181	203/17275	3.03e-08	2.03e-05	12558/13048/103967/13869/67703/16795/17762/58235/320840/18189/243725/14083/19266/56013
C3	Late-down	GO	BP	GO:1990778	protein localization to cell periphery	18/181	365/17275	5.73e-08	3.07e-05	74205/11735/12558/76499/13869/16553/16795/58998/18189/217893/18762/224624/109905/75788/83671/665113/52588/232341
C3	Late-down	GO	BP	GO:1901888	regulation of cell junction assembly	14/181	221/17275	8.79e-08	3.92e-05	11350/76499/13048/18606/58235/320840/18189/243725/14083/19266/109905/20874/56013/21872
C3	Late-down	GO	BP	GO:0050770	regulation of axonogenesis	12/181	169/17275	2.21e-07	7.42e-05	12558/13131/16554/17762/18479/14083/20356/20358/71653/75788/338362/24136
C3	Late-down	GO	BP	GO:0007409	axonogenesis	19/181	444/17275	2.22e-07	7.42e-05	11350/11735/319974/12558/76499/13131/13176/14183/16554/17762/58235/18479/14083/20356/20358/71653/75788/338362/24136
C3	Late-down	GO	BP	GO:0061564	axon development	20/181	496/17275	2.71e-07	8.05e-05	11350/11735/319974/12558/76499/13131/13176/14183/108073/16554/17762/58235/18479/14083/20356/20358/71653/75788/338362/24136
C3	Late-down	GO	BP	GO:0050806	positive regulation of synaptic transmission	12/181	196/17275	1.09e-06	0.000290359	11350/13869/14802/14806/16795/338370/18189/18479/243725/18762/14083/76376
C3	Late-down	GO	BP	GO:1902414	protein localization to cell junction	9/181	124/17275	6.29e-06	0.00149198	13869/17762/58235/58998/18189/18762/109905/21872/665113
C3	Late-down	GO	BP	GO:0048675	axon extension	9/181	126/17275	7.17e-06	0.00149198	11350/319974/76499/17762/18479/20356/20358/71653/75788
C3	Late-down	GO	BP	GO:0001667	ameboidal-type cell migration	16/181	412/17275	7.25e-06	0.00149198	11350/12558/76499/63953/18606/13869/14119/14673/79221/16590/18479/14083/67338/20356/20358/24136
C3	Late-down	GO	BP	GO:0050807	regulation of synapse organization	13/181	281/17275	8.58e-06	0.0016397	11350/12558/30785/13048/103967/58235/320840/18189/327814/243725/14083/19266/56013
C3	Late-down	GO	BP	GO:0061572	actin filament bundle organization	10/181	165/17275	9.56e-06	0.00170611	11350/11518/76499/54418/18479/243725/71653/21872/56363/24136
C3	Late-down	GO	BP	GO:0050803	regulation of synapse structure or activity	13/181	289/17275	1.16e-05	0.00193721	11350/12558/30785/13048/103967/58235/320840/18189/327814/243725/14083/19266/56013
C3	Late-down	GO	BP	GO:0030516	regulation of axon extension	8/181	105/17275	1.46e-05	0.0022981	11350/76499/17762/18479/20356/20358/71653/75788
C3	Late-down	GO	BP	GO:0050767	regulation of neurogenesis	16/181	441/17275	1.69e-05	0.0024354	13048/13131/63953/18606/320191/16590/17762/18479/14083/19266/20356/20358/71653/75788/665113/24136
C3	Late-down	GO	BP	GO:0098742	cell-cell adhesion via plasma-membrane adhesion molecules	10/181	177/17275	1.77e-05	0.0024354	320873/227485/12558/13131/67703/58235/58998/18189/19266/232341
C3	Late-down	GO	BP	GO:0060560	developmental growth involved in morphogenesis	12/181	258/17275	1.82e-05	0.0024354	11350/319974/76499/14183/17762/18479/18762/20356/20358/71653/75788/24136
C3	Late-down	GO	BP	GO:0007611	learning or memory	13/181	303/17275	1.91e-05	0.0024354	11350/218038/13048/108073/319984/16590/16795/17762/18189/18479/238871/18762/76376
C3	Late-down	GO	BP	GO:0001764	neuron migration	10/181	181/17275	2.14e-05	0.00260603	56079/319974/13131/13176/67703/16795/17762/14083/20358/71653
C3	Late-down	GO	BP	GO:0032970	regulation of actin filament-based process	14/181	360/17275	2.72e-05	0.00315908	11350/11518/213649/76499/216033/18479/18578/238871/243725/20356/21872/56363/21916/24136
C3	Late-down	GO	BP	GO:1990138	neuron projection extension	10/181	189/17275	3.11e-05	0.0034635	11350/319974/76499/17762/18479/18762/20356/20358/71653/75788
C3	Late-down	GO	BP	GO:0061387	regulation of extent of cell growth	8/181	118/17275	3.41e-05	0.00365296	11350/76499/17762/18479/20356/20358/71653/75788
C3	Late-down	GO	BP	GO:1905475	regulation of protein localization to membrane	10/181	193/17275	3.71e-05	0.00382216	74205/11735/12558/76499/18189/18479/18762/109905/665113/232341
C3	Late-down	GO	BP	GO:0008361	regulation of cell size	10/181	194/17275	3.88e-05	0.00384591	11350/11518/76499/17762/18479/20356/20358/71653/75788/232341
C3	Late-down	GO	BP	GO:0051017	actin filament bundle assembly	9/181	162/17275	5.33e-05	0.00476959	11350/11518/76499/54418/18479/243725/21872/56363/24136
C3	Late-down	GO	BP	GO:0010720	positive regulation of cell development	16/181	487/17275	5.57e-05	0.00476959	11518/75302/13048/63953/18606/16590/17762/18479/18762/14083/19266/20356/71653/75788/665113/24136
C3	Late-down	GO	BP	GO:0050890	cognition	13/181	336/17275	5.58e-05	0.00476959	11350/218038/13048/108073/319984/16590/16795/17762/18189/18479/238871/18762/76376
C3	Late-down	GO	BP	GO:0044089	positive regulation of cellular component biogenesis	16/181	488/17275	5.71e-05	0.00476959	11350/319974/101565/76499/13048/103967/18606/329679/16590/17762/18189/18479/75769/19266/105439/209131
C3	Late-down	GO	BP	GO:0050769	positive regulation of neurogenesis	12/181	292/17275	6.1e-05	0.00476959	13048/18606/16590/17762/18479/14083/19266/20356/71653/75788/665113/24136
C3	Late-down	GO	BP	GO:0099175	regulation of postsynapse organization	8/181	128/17275	6.1e-05	0.00476959	12558/13048/103967/18189/327814/243725/19266/56013
C3	Late-down	GO	BP	GO:0051347	positive regulation of transferase activity	15/181	441/17275	6.5e-05	0.00476959	11350/75302/13131/13869/14183/16590/18189/18479/243725/18762/14083/109905/218442/56013/24136
C3	Late-down	GO	BP	GO:0051656	establishment of organelle localization	15/181	441/17275	6.5e-05	0.00476959	76499/94040/103967/75914/14183/54418/320191/16553/16590/17762/327814/18762/14083/64009/109246
C3	Late-down	GO	BP	GO:0010761	fibroblast migration	6/181	66/17275	6.57e-05	0.00476959	76499/14673/18479/14083/67338/24136
C3	Late-down	GO	BP	GO:0007157	heterophilic cell-cell adhesion via plasma membrane cell adhesion molecules	5/181	41/17275	6.59e-05	0.00476959	12558/58235/58998/18189/19266
C3	Late-down	GO	BP	GO:0060997	dendritic spine morphogenesis	6/181	67/17275	7.15e-05	0.00493411	13048/103967/210293/327814/243725/56013
C3	Late-down	GO	BP	GO:0051963	regulation of synapse assembly	8/181	131/17275	7.19e-05	0.00493411	13048/58235/320840/18189/243725/14083/19266/56013
C3	Late-down	GO	BP	GO:0051962	positive regulation of nervous system development	13/181	350/17275	8.43e-05	0.00563863	13048/18606/16590/17762/18189/18479/14083/19266/20356/71653/75788/665113/24136
C3	Late-down	GO	BP	GO:1902473	regulation of protein localization to synapse	4/181	23/17275	8.83e-05	0.00568649	17762/18762/109905/665113
C3	Late-down	GO	BP	GO:0048638	regulation of developmental growth	13/181	352/17275	8.92e-05	0.00568649	11350/11990/76499/63953/13869/14183/17762/18479/14083/20356/20358/71653/75788
C3	Late-down	GO	BP	GO:0043410	positive regulation of MAPK cascade	15/181	456/17275	9.44e-05	0.00583183	11350/12558/13176/13869/14183/15258/16590/217588/18189/18479/18584/18762/109905/665113/24136
C3	Late-down	GO	BP	GO:0048588	developmental cell growth	11/181	260/17275	9.59e-05	0.00583183	11350/319974/76499/17762/18479/18762/20356/20358/71653/75788/24136
C3	Late-down	GO	BP	GO:0010762	regulation of fibroblast migration	5/181	45/17275	0.000103936	0.00610293	14673/18479/14083/67338/24136
C3	Late-down	GO	BP	GO:0021761	limbic system development	7/181	103/17275	0.000104908	0.00610293	13131/70762/14183/67703/16795/18479/24136
C3	Late-down	GO	BP	GO:0033674	positive regulation of kinase activity	13/181	364/17275	0.000124706	0.00710028	11350/13131/13869/14183/16590/18189/18479/243725/18762/14083/109905/56013/24136
C3	Late-down	GO	BP	GO:0007015	actin filament organization	14/181	420/17275	0.000141421	0.00785401	11350/11518/76499/56419/54418/194401/18479/243725/20356/71653/21872/56363/21916/24136
C3	Late-down	GO	BP	GO:0007162	negative regulation of cell adhesion	11/181	273/17275	0.000147387	0.00785401	11350/76499/13131/18606/14083/381305/20356/20358/56013/232341/269023
C3	Late-down	GO	BP	GO:0030038	contractile actin filament bundle assembly	7/181	109/17275	0.000149684	0.00785401	11350/76499/18479/243725/21872/56363/24136
C3	Late-down	GO	BP	GO:0043149	stress fiber assembly	7/181	109/17275	0.000149684	0.00785401	11350/76499/18479/243725/21872/56363/24136
C3	Late-down	GO	BP	GO:0002088	lens development in camera-type eye	6/181	77/17275	0.00015589	0.0079182	14183/15258/58235/58998/21916/24136
C3	Late-down	GO	BP	GO:0045773	positive regulation of axon extension	5/181	49/17275	0.000156825	0.0079182	17762/18479/20356/71653/75788
C3	Late-down	GO	BP	GO:0048167	regulation of synaptic plasticity	10/181	237/17275	0.000203945	0.0097835	11350/14806/319984/16590/16795/17762/18479/243725/18762/76376
C3	Late-down	GO	BP	GO:0097120	receptor localization to synapse	6/181	81/17275	0.000206144	0.0097835	77531/13869/18189/18762/109905/665113
C3	Late-down	GO	BP	GO:0031113	regulation of microtubule polymerization	5/181	52/17275	0.000208393	0.0097835	11350/76499/17762/18479/105439
C3	Late-down	GO	BP	GO:0061001	regulation of dendritic spine morphogenesis	5/181	52/17275	0.000208393	0.0097835	13048/103967/327814/243725/56013
C3	Late-down	GO	BP	GO:0051261	protein depolymerization	7/181	116/17275	0.000220303	0.0101643	11518/76499/72685/194401/20356/20408/21916
C3	Late-down	GO	BP	GO:0051497	negative regulation of stress fiber assembly	4/181	29/17275	0.000225593	0.010232	76499/243725/21872/56363
C3	Late-down	GO	BP	GO:0051648	vesicle localization	9/181	198/17275	0.000245329	0.0109417	12558/76499/103967/75914/14183/16553/18189/327814/18762
C3	Late-down	GO	BP	GO:0060996	dendritic spine development	7/181	119/17275	0.000257808	0.0112266	13048/103967/210293/18479/327814/243725/56013
C3	Late-down	GO	BP	GO:0016358	dendrite development	11/181	292/17275	0.000263874	0.0112266	11350/13048/13131/103967/210293/18479/327814/243725/19266/56013/665113
C3	Late-down	GO	BP	GO:0031032	actomyosin structure organization	9/181	200/17275	0.000264304	0.0112266	11350/76499/228564/18479/243725/21872/56363/21916/24136
C3	Late-down	GO	BP	GO:0022604	regulation of cell morphogenesis	10/181	248/17275	0.000293408	0.0118269	72729/13048/18606/14673/16590/14083/19266/27059/75788/665113
C3	Late-down	GO	BP	GO:0007097	nuclear migration	4/181	31/17275	0.00029402	0.0118269	94040/320191/14083/64009
C3	Late-down	GO	BP	GO:0034332	adherens junction organization	5/181	56/17275	0.000296114	0.0118269	11518/320873/227485/12558/21872
C3	Late-down	GO	BP	GO:0090497	mesenchymal cell migration	5/181	56/17275	0.000296114	0.0118269	12558/13869/20356/20358/24136
C3	Late-down	GO	BP	GO:0016339	calcium-dependent cell-cell adhesion via plasma membrane cell adhesion molecules	4/181	33/17275	0.000376179	0.0146395	320873/227485/12558/18189
C3	Late-down	GO	BP	GO:0099504	synaptic vesicle cycle	9/181	210/17275	0.000378392	0.0146395	218038/27062/12558/72685/103967/18189/327814/109905/20408
C3	Late-down	GO	BP	GO:0032535	regulation of cellular component size	12/181	356/17275	0.000384385	0.0146395	11350/11518/76499/17762/18479/243725/20356/20358/71653/75788/21916/232341
C3	Late-down	GO	BP	GO:0050772	positive regulation of axonogenesis	6/181	91/17275	0.000388417	0.0146395	17762/18479/20356/71653/75788/24136
C3	Late-down	GO	BP	GO:0051492	regulation of stress fiber assembly	6/181	92/17275	0.000411951	0.015185	11350/76499/18479/243725/21872/56363
C3	Late-down	GO	BP	GO:0048813	dendrite morphogenesis	8/181	169/17275	0.00041424	0.015185	13048/103967/210293/327814/243725/19266/56013/665113
C3	Late-down	GO	BP	GO:0035418	protein localization to synapse	6/181	93/17275	0.000436585	0.0157879	13869/17762/18189/18762/109905/665113
C3	Late-down	GO	BP	GO:0045860	positive regulation of protein kinase activity	11/181	311/17275	0.000450196	0.016063	11350/13131/16590/18189/18479/243725/18762/14083/109905/56013/24136
C3	Late-down	GO	BP	GO:0032232	negative regulation of actin filament bundle assembly	4/181	35/17275	0.000473558	0.0163608	76499/243725/21872/56363
C3	Late-down	GO	BP	GO:0051893	regulation of focal adhesion assembly	5/181	62/17275	0.000476884	0.0163608	11350/76499/18606/14083/20874
C3	Late-down	GO	BP	GO:0090109	regulation of cell-substrate junction assembly	5/181	62/17275	0.000476884	0.0163608	11350/76499/18606/14083/20874
C3	Late-down	GO	BP	GO:0097061	dendritic spine organization	6/181	97/17275	0.000546828	0.0183304	13048/103967/210293/327814/243725/56013
C3	Late-down	GO	BP	GO:0010976	positive regulation of neuron projection development	9/181	221/17275	0.000547993	0.0183304	11350/13048/13176/17762/320840/18189/75769/243725/109905
C3	Late-down	GO	BP	GO:0046777	protein autophosphorylation	9/181	222/17275	0.000566088	0.0186984	11350/13869/14183/16590/18479/14083/20874/665113/232341
C3	Late-down	GO	BP	GO:0098696	regulation of neurotransmitter receptor localization to postsynaptic specialization membrane	3/181	16/17275	0.00057297	0.0186984	18762/109905/665113
C3	Late-down	GO	BP	GO:0032271	regulation of protein polymerization	8/181	179/17275	0.000606415	0.0195514	11350/11518/76499/17762/18479/243725/105439/21916
C3	Late-down	GO	BP	GO:0051647	nucleus localization	4/181	38/17275	0.000651475	0.0202715	94040/320191/14083/64009
C3	Late-down	GO	BP	GO:0099633	protein localization to postsynaptic specialization membrane	4/181	38/17275	0.000651475	0.0202715	13869/18762/109905/665113
C3	Late-down	GO	BP	GO:0099645	neurotransmitter receptor localization to postsynaptic specialization membrane	4/181	38/17275	0.000651475	0.0202715	13869/18762/109905/665113
C3	Late-down	GO	BP	GO:0018105	peptidyl-serine phosphorylation	10/181	276/17275	0.000678167	0.0207503	70762/329679/15258/227743/18189/18479/238871/18762/27219/232341
C3	Late-down	GO	BP	GO:0150116	regulation of cell-substrate junction organization	5/181	67/17275	0.000682373	0.0207503	11350/76499/18606/14083/20874
C3	Late-down	GO	BP	GO:0070372	regulation of ERK1 and ERK2 cascade	10/181	279/17275	0.000736902	0.0221567	11350/13176/63953/13869/14183/18189/18584/18762/109905/20358
C3	Late-down	GO	BP	GO:0120032	regulation of plasma membrane bounded cell projection assembly	8/181	185/17275	0.000752649	0.0223788	319974/101565/103967/16590/18189/75769/243725/64009
C3	Late-down	GO	BP	GO:0099173	postsynapse organization	9/181	232/17275	0.000775502	0.0228049	12558/13048/103967/210293/18189/327814/243725/19266/56013
C3	Late-down	GO	BP	GO:0110020	regulation of actomyosin structure organization	6/181	104/17275	0.000790612	0.0229965	11350/76499/18479/243725/21872/56363
C3	Late-down	GO	BP	GO:0060491	regulation of cell projection assembly	8/181	187/17275	0.000807258	0.0232282	319974/101565/103967/16590/18189/75769/243725/64009
C3	Late-down	GO	BP	GO:0106027	neuron projection organization	6/181	105/17275	0.000831351	0.023667	13048/103967/210293/327814/243725/56013
C3	Late-down	GO	BP	GO:0044331	cell-cell adhesion mediated by cadherin	4/181	41/17275	0.000872216	0.0243541	320873/227485/12558/21872
C3	Late-down	GO	BP	GO:0032231	regulation of actin filament bundle assembly	6/181	106/17275	0.000873691	0.0243541	11350/76499/18479/243725/21872/56363
C3	Late-down	GO	BP	GO:0006887	exocytosis	11/181	339/17275	0.000917053	0.0250659	27062/76499/75914/16590/194401/18479/58869/327814/109905/56013/83671
C3	Late-down	GO	BP	GO:0007264	small GTPase mediated signal transduction	12/181	393/17275	0.000917958	0.0250659	11350/319974/72729/12558/13131/210293/14673/227743/234353/241308/109905/71653
C3	Late-down	GO	BP	GO:0018209	peptidyl-serine modification	10/181	288/17275	0.0009388	0.025376	70762/329679/15258/227743/18189/18479/238871/18762/27219/232341
C3	Late-down	GO	BP	GO:0099565	chemical synaptic transmission, postsynaptic	6/181	108/17275	0.000963343	0.0256679	77531/13048/14806/18189/243725/18762
C3	Late-down	GO	BP	GO:1905874	regulation of postsynaptic density organization	3/181	19/17275	0.000968782	0.0256679	12558/18189/19266
C3	Late-down	GO	BP	GO:0070374	positive regulation of ERK1 and ERK2 cascade	8/181	193/17275	0.000990468	0.0259852	11350/13176/13869/14183/18189/18584/18762/109905
C3	Late-down	GO	BP	GO:0030010	establishment of cell polarity	7/181	150/17275	0.00103247	0.0268242	11350/76499/232288/18479/18762/71653/338362
C3	Late-down	GO	BP	GO:0061028	establishment of endothelial barrier	4/181	43/17275	0.00104575	0.0269078	11518/238871/109905/21872
C3	Late-down	GO	BP	GO:0051258	protein polymerization	9/181	244/17275	0.00110606	0.0281888	11350/11518/76499/56419/17762/18479/243725/105439/21916
C3	Late-down	GO	BP	GO:0032230	positive regulation of synaptic transmission, GABAergic	3/181	20/17275	0.001131	0.0282856	13869/338370/18189
C3	Late-down	GO	BP	GO:0090043	regulation of tubulin deacetylation	3/181	20/17275	0.001131	0.0282856	320365/17762/217588
C3	Late-down	GO	BP	GO:0007613	memory	7/181	153/17275	0.00115865	0.0287086	13048/108073/16795/17762/238871/18762/76376
C3	Late-down	GO	BP	GO:1902903	regulation of supramolecular fiber organization	11/181	350/17275	0.00118659	0.0291312	11350/11518/76499/17762/18479/243725/20356/105439/21872/56363/21916
C3	Late-down	GO	BP	GO:0110053	regulation of actin filament organization	9/181	247/17275	0.0012044	0.0292997	11350/11518/76499/18479/243725/20356/21872/56363/21916
C3	Late-down	GO	BP	GO:0001952	regulation of cell-matrix adhesion	6/181	113/17275	0.0012185	0.0293756	11350/76499/18606/18762/14083/20874
C3	Late-down	GO	BP	GO:1903115	regulation of actin filament-based movement	4/181	45/17275	0.00124218	0.0294175	216033/18578/238871/24136
C3	Late-down	GO	BP	GO:0070371	ERK1 and ERK2 cascade	10/181	299/17275	0.00124512	0.0294175	11350/13176/63953/13869/14183/18189/18584/18762/109905/20358
C3	Late-down	GO	BP	GO:0099003	vesicle-mediated transport in synapse	9/181	249/17275	0.00127379	0.0294175	218038/27062/12558/72685/103967/18189/327814/109905/20408
C3	Late-down	GO	BP	GO:0030048	actin filament-based movement	6/181	114/17275	0.0012752	0.0294175	216033/18578/238871/71653/215280/24136
C3	Late-down	GO	BP	GO:0060291	long-term synaptic potentiation	6/181	114/17275	0.0012752	0.0294175	11350/16795/18479/243725/18762/76376
C3	Late-down	GO	BP	GO:0090042	tubulin deacetylation	3/181	21/17275	0.00130939	0.0296942	320365/17762/217588
C3	Late-down	GO	BP	GO:1905244	regulation of modification of synaptic structure	3/181	21/17275	0.00130939	0.0296942	11350/30785/14083
C3	Late-down	GO	BP	GO:0007254	JNK cascade	7/181	157/17275	0.00134535	0.0302535	63953/70686/14806/15258/217588/14083/665113
C3	Late-down	GO	BP	GO:0014032	neural crest cell development	5/181	78/17275	0.00135987	0.0302675	12558/13869/20356/20358/24136
C3	Late-down	GO	BP	GO:0031345	negative regulation of cell projection organization	8/181	203/17275	0.0013686	0.0302675	101565/13131/19347/103967/18189/14083/20356/20358
C3	Late-down	GO	BP	GO:0042552	myelination	7/181	158/17275	0.00139551	0.0306098	11990/76960/12558/118446/16795/218442/22239
C3	Late-down	GO	BP	GO:0021766	hippocampus development	5/181	79/17275	0.00143961	0.0313204	13131/70762/67703/16795/24136
C3	Late-down	GO	BP	GO:0007272	ensheathment of neurons	7/181	160/17275	0.00150021	0.0321166	11990/76960/12558/118446/16795/218442/22239
C3	Late-down	GO	BP	GO:0008366	axon ensheathment	7/181	160/17275	0.00150021	0.0321166	11990/76960/12558/118446/16795/218442/22239
C3	Late-down	GO	BP	GO:1904892	regulation of receptor signaling pathway via STAT	5/181	80/17275	0.00152275	0.0323404	13131/13869/16590/107895/19266
C3	Late-down	GO	BP	GO:0046785	microtubule polymerization	5/181	81/17275	0.00160937	0.0336459	11350/76499/17762/18479/105439
C3	Late-down	GO	BP	GO:0051966	regulation of synaptic transmission, glutamatergic	5/181	81/17275	0.00160937	0.0336459	12558/14802/14806/108073/18189
C3	Late-down	GO	BP	GO:0001525	angiogenesis	13/181	479/17275	0.00164735	0.0341312	11350/11518/14183/79221/15245/15258/18189/14083/20356/20358/21413/21872/232341
C3	Late-down	GO	BP	GO:0035249	synaptic transmission, glutamatergic	6/181	120/17275	0.00165896	0.0341312	12558/14802/14806/108073/18189/18479
C3	Late-down	GO	BP	GO:0045765	regulation of angiogenesis	9/181	259/17275	0.00167085	0.0341312	11350/11518/15245/15258/20356/20358/21413/21872/232341
C3	Late-down	GO	BP	GO:0032956	regulation of actin cytoskeleton organization	10/181	312/17275	0.00170767	0.0344047	11350/11518/213649/76499/18479/243725/20356/21872/56363/21916
C3	Late-down	GO	BP	GO:0071709	membrane assembly	4/181	49/17275	0.00170995	0.0344047	11735/12558/18189/19266
C3	Late-down	GO	BP	GO:0007265	Ras protein signal transduction	10/181	315/17275	0.00183207	0.0361447	11350/319974/72729/12558/14673/227743/234353/241308/109905/71653
C3	Late-down	GO	BP	GO:0016049	cell growth	13/181	485/17275	0.00183831	0.0361447	11350/319974/76499/227743/17762/18479/18762/14083/20356/20358/71653/75788/24136
C3	Late-down	GO	BP	GO:0051489	regulation of filopodium assembly	4/181	50/17275	0.00184362	0.0361447	103967/18189/75769/243725
C3	Late-down	GO	BP	GO:1901342	regulation of vasculature development	9/181	263/17275	0.00185511	0.0361447	11350/11518/15245/15258/20356/20358/21413/21872/232341
C3	Late-down	GO	BP	GO:0099072	regulation of postsynaptic membrane neurotransmitter receptor levels	6/181	123/17275	0.00188096	0.0361447	103967/13869/59079/18762/109905/665113
C3	Late-down	GO	BP	GO:0030900	forebrain development	11/181	371/17275	0.0018826	0.0361447	12558/13131/70762/13869/14183/320191/67703/16795/18479/20356/24136
C3	Late-down	GO	BP	GO:0031110	regulation of microtubule polymerization or depolymerization	5/181	84/17275	0.00189098	0.0361447	11350/76499/17762/18479/105439
C3	Late-down	GO	BP	GO:0007163	establishment or maintenance of cell polarity	8/181	214/17275	0.00190869	0.0362245	11350/11735/76499/232288/18479/18762/71653/338362
C3	Late-down	GO	BP	GO:0090659	walking behavior	4/181	51/17275	0.00198435	0.0370253	13131/15258/16795/17762
C3	Late-down	GO	BP	GO:0048041	focal adhesion assembly	5/181	85/17275	0.00199239	0.0370253	11350/76499/18606/14083/20874
C3	Late-down	GO	BP	GO:0048864	stem cell development	5/181	85/17275	0.00199239	0.0370253	12558/13869/20356/20358/24136
C3	Late-down	GO	BP	GO:0008154	actin polymerization or depolymerization	7/181	169/17275	0.00204942	0.0378223	11350/11518/56419/194401/243725/20356/21916
C3	Late-down	GO	BP	GO:0002089	lens morphogenesis in camera-type eye	3/181	25/17275	0.0021958	0.0401775	15258/58235/58998
C3	Late-down	GO	BP	GO:0021954	central nervous system neuron development	5/181	87/17275	0.00220706	0.0401775	13176/70762/14183/14083/24136
C3	Late-down	GO	BP	GO:0042391	regulation of membrane potential	12/181	437/17275	0.00224502	0.0405925	11735/216033/13048/14806/17762/338370/18189/58869/243725/18762/71653/109246
C3	Late-down	GO	BP	GO:0030042	actin filament depolymerization	4/181	53/17275	0.00228779	0.0410881	11518/194401/20356/21916
C3	Late-down	GO	BP	GO:0014033	neural crest cell differentiation	5/181	88/17275	0.0023205	0.0411235	12558/13869/20356/20358/24136
C3	Late-down	GO	BP	GO:0070252	actin-mediated cell contraction	5/181	88/17275	0.0023205	0.0411235	216033/18578/238871/71653/24136
C3	Late-down	GO	BP	GO:0031503	protein-containing complex localization	8/181	222/17275	0.00239775	0.0422129	77531/103967/13869/18189/18762/109905/665113/109246
C3	Late-down	GO	BP	GO:0021953	central nervous system neuron differentiation	7/181	174/17275	0.00241537	0.0422453	215378/13176/70762/14183/18189/14083/24136
C3	Late-down	GO	BP	GO:0001755	neural crest cell migration	4/181	54/17275	0.00245087	0.0425878	13869/20356/20358/24136
C3	Late-down	GO	BP	GO:0045927	positive regulation of growth	9/181	275/17275	0.00250737	0.0432885	13869/14183/227743/17762/18479/14083/20356/71653/75788
C3	Late-down	GO	BP	GO:0060079	excitatory postsynaptic potential	5/181	90/17275	0.00256001	0.043914	13048/14806/18189/243725/18762
C3	Late-down	GO	BP	GO:0006665	sphingolipid metabolic process	6/181	131/17275	0.00258322	0.0440299	27404/170439/74559/18606/16590/22239
C3	Late-down	GO	BP	GO:0030307	positive regulation of cell growth	7/181	177/17275	0.00265793	0.0448761	227743/17762/18479/14083/20356/71653/75788
C3	Late-down	GO	BP	GO:0030177	positive regulation of Wnt signaling pathway	6/181	132/17275	0.00268317	0.0448761	11350/14183/66743/20356/232341/24136
C3	Late-down	GO	BP	GO:0046328	regulation of JNK cascade	6/181	132/17275	0.00268317	0.0448761	63953/70686/14806/15258/217588/665113
C3	Late-down	GO	BP	GO:1902683	regulation of receptor localization to synapse	3/181	27/17275	0.00274995	0.0453439	18762/109905/665113
C3	Late-down	GO	BP	GO:0032984	protein-containing complex disassembly	8/181	227/17275	0.00275008	0.0453439	11518/76499/72685/194401/20356/20408/21916/232341
C3	Late-down	GO	BP	GO:0006476	protein deacetylation	4/181	56/17275	0.00280066	0.0453439	320365/79221/17762/217588
C3	Late-down	GO	BP	GO:0006893	Golgi to plasma membrane transport	4/181	56/17275	0.00280066	0.0453439	74205/11735/75914/16553
C3	Late-down	GO	BP	GO:0044091	membrane biogenesis	4/181	56/17275	0.00280066	0.0453439	11735/12558/18189/19266
C3	Late-down	GO	BP	GO:0007612	learning	7/181	179/17275	0.00282976	0.0453439	218038/108073/319984/16590/18189/18479/76376
C3	Late-down	GO	BP	GO:0051650	establishment of vesicle localization	7/181	179/17275	0.00282976	0.0453439	76499/103967/75914/14183/16553/327814/18762
C3	Late-down	GO	BP	GO:0018108	peptidyl-tyrosine phosphorylation	9/181	281/17275	0.00289562	0.0459487	11350/18606/13869/14183/16590/18762/14083/56013/109246
C3	Late-down	GO	BP	GO:0048762	mesenchymal cell differentiation	8/181	229/17275	0.00290185	0.0459487	12558/76499/13869/14183/14083/20356/20358/24136
C3	Late-down	GO	BP	GO:0097479	synaptic vesicle localization	4/181	57/17275	0.00298774	0.0470305	12558/103967/14183/18189
C3	Late-down	GO	BP	GO:0018212	peptidyl-tyrosine modification	9/181	283/17275	0.00303511	0.0474967	11350/18606/13869/14183/16590/18762/14083/56013/109246
C3	Late-down	GO	BP	GO:0090287	regulation of cellular response to growth factor stimulus	9/181	284/17275	0.00310681	0.0483362	11350/14119/15245/15258/18189/20358/75788/21413/24136
C3	Late-down	GO	CC	GO:0098984	neuron to neuron synapse	22/179	418/17300	4.03e-10	1.16e-07	11518/77531/12558/13176/72685/103967/13869/14802/14806/108073/17762/58235/58998/18189/18479/18578/243725/18762/19266/20408/56013/665113
C3	Late-down	GO	CC	GO:0099572	postsynaptic specialization	21/179	404/17300	1.3e-09	1.87e-07	11518/77531/320873/12558/13176/72685/103967/13869/59079/14802/14806/17762/58998/18479/18578/327814/243725/18762/20408/56013/665113
C3	Late-down	GO	CC	GO:0032279	asymmetric synapse	19/179	381/17300	1.63e-08	1.56e-06	11518/77531/12558/13176/72685/103967/13869/14802/14806/108073/17762/58998/18479/18578/243725/18762/20408/56013/665113
C3	Late-down	GO	CC	GO:0014069	postsynaptic density	18/179	359/17300	3.67e-08	2.63e-06	11518/77531/12558/13176/72685/103967/13869/14802/14806/17762/58998/18479/18578/243725/18762/20408/56013/665113
C3	Late-down	GO	CC	GO:0044291	cell-cell contact zone	9/179	83/17300	1.89e-07	1.09e-05	11735/12558/216033/58235/58998/18479/211712/14083/21872
C3	Late-down	GO	CC	GO:0005911	cell-cell junction	19/179	454/17300	2.56e-07	1.23e-05	11518/11735/320873/227485/12558/216033/232288/228564/118446/67703/16590/58235/58998/18189/18479/211712/18762/14083/21872
C3	Late-down	GO	CC	GO:0030427	site of polarized growth	12/179	204/17300	1.45e-06	5.94e-05	11350/319974/76499/13176/320365/17762/58235/18189/18479/211712/243725/71653
C3	Late-down	GO	CC	GO:0005912	adherens junction	10/179	143/17300	2.38e-06	8.55e-05	11518/320873/227485/12558/216033/232288/228564/58235/58998/21872
C3	Late-down	GO	CC	GO:0150034	distal axon	15/179	362/17300	5.62e-06	0.000172742	11350/218038/319974/76499/13176/14802/14806/108073/17762/58235/18189/18479/211712/243725/71653
C3	Late-down	GO	CC	GO:0015629	actin cytoskeleton	17/179	461/17300	6.22e-06	0.000172742	11350/231148/11518/319974/12558/30785/208846/56419/54418/77113/18479/243725/18762/14083/56013/21916/215280
C3	Late-down	GO	CC	GO:0030426	growth cone	11/179	197/17300	6.62e-06	0.000172742	11350/319974/76499/13176/17762/58235/18189/18479/211712/243725/71653
C3	Late-down	GO	CC	GO:0031252	cell leading edge	15/179	386/17300	1.21e-05	0.000288993	11350/218038/12558/76499/216033/232288/17762/18479/243725/18762/234353/14083/71653/20874/56013
C3	Late-down	GO	CC	GO:0042734	presynaptic membrane	11/179	217/17300	1.65e-05	0.000363846	320873/12558/72685/13869/14802/14806/108073/58235/18189/327814/19266
C3	Late-down	GO	CC	GO:0097060	synaptic membrane	16/179	466/17300	2.83e-05	0.000579139	11735/320873/12558/13176/72685/103967/13869/14802/14806/108073/58235/58998/18189/327814/19266/64009
C3	Late-down	GO	CC	GO:0014704	intercalated disc	6/179	61/17300	3.91e-05	0.000701073	11735/12558/216033/18479/14083/21872
C3	Late-down	GO	CC	GO:0048787	presynaptic active zone membrane	6/179	61/17300	3.91e-05	0.000701073	320873/12558/14802/108073/58235/18189
C3	Late-down	GO	CC	GO:0044295	axonal growth cone	5/179	45/17300	9.8e-05	0.00165404	76499/13176/17762/18189/71653
C3	Late-down	GO	CC	GO:0048786	presynaptic active zone	7/179	113/17300	0.000173409	0.00276491	320873/12558/14802/108073/58235/18189/327814
C3	Late-down	GO	CC	GO:0019898	extrinsic component of membrane	9/179	205/17300	0.000289103	0.00436697	218038/27062/320873/227485/12558/72685/13527/14673/14696
C3	Late-down	GO	CC	GO:0098686	hippocampal mossy fiber to CA3 synapse	5/179	58/17300	0.000329689	0.00473104	77531/14806/58235/58998/19266
C3	Late-down	GO	CC	GO:0019897	extrinsic component of plasma membrane	7/179	133/17300	0.000469951	0.00620393	320873/227485/12558/72685/13527/14673/14696
C3	Late-down	GO	CC	GO:0005938	cell cortex	10/179	267/17300	0.000475563	0.00620393	12558/76499/75914/14183/54418/320365/108073/243725/18762/21916
C3	Late-down	GO	CC	GO:0045211	postsynaptic membrane	11/179	320/17300	0.000514155	0.00641576	11735/320873/12558/13176/103967/13869/14802/14806/108073/58998/64009
C3	Late-down	GO	CC	GO:0031594	neuromuscular junction	6/179	100/17300	0.000601861	0.00719725	11735/13869/59079/16795/18189/243725
C3	Late-down	GO	CC	GO:0099634	postsynaptic specialization membrane	7/179	141/17300	0.000666328	0.00764945	320873/12558/13176/13869/14802/14806/58998
C3	Late-down	GO	CC	GO:0043197	dendritic spine	8/179	198/17300	0.00107707	0.0118892	11518/103967/210293/14802/18578/327814/243725/14083
C3	Late-down	GO	CC	GO:0044309	neuron spine	8/179	202/17300	0.00122426	0.0130135	11518/103967/210293/14802/18578/327814/243725/14083
C3	Late-down	GO	CC	GO:0098982	GABA-ergic synapse	6/179	123/17300	0.00176545	0.0180958	320873/13869/108073/18189/18479/232341
C3	Late-down	GO	CC	GO:0030027	lamellipodium	7/179	171/17300	0.00204055	0.0201944	12558/216033/18479/243725/14083/71653/56013
C3	Late-down	GO	CC	GO:0043296	apical junction complex	6/179	128/17300	0.00215999	0.0206639	11735/232288/58235/58998/18762/21872
C3	Late-down	GO	CC	GO:0005874	microtubule	11/179	408/17300	0.00354504	0.0322975	76499/103967/234663/320191/16553/16554/17762/71653/105439/320244/70892
C3	Late-down	GO	CC	GO:0016342	catenin complex	3/179	30/17300	0.00360112	0.0322975	320873/227485/12558
C3	Late-down	GO	CC	GO:0030016	myofibril	7/179	199/17300	0.00472346	0.0410798	231148/11735/18479/18578/238871/64009/21916
C3	Late-down	GO	CC	GO:0098839	postsynaptic density membrane	5/179	107/17300	0.00509762	0.0430299	13176/13869/14802/14806/58998
C3	Late-down	GO	CC	GO:0005916	fascia adherens	2/179	11/17300	0.00550683	0.0439017	12558/216033
C3	Late-down	GO	CC	GO:0060187	cell pole	2/179	11/17300	0.00550683	0.0439017	56079/58869
C3	Late-down	GO	MF	GO:0050839	cell adhesion molecule binding	14/178	272/17195	9.47e-07	0.00017607	11735/320873/227485/12558/216033/228564/67703/58235/58998/18189/14083/19266/71653/21872
C3	Late-down	GO	MF	GO:0003779	actin binding	17/178	401/17195	9.54e-07	0.00017607	11350/231148/11518/76499/94040/216033/208846/56419/54418/77113/194401/243725/14083/71653/64009/21916/215280
C3	Late-down	GO	MF	GO:0051020	GTPase binding	14/178	307/17195	3.92e-06	0.000482114	72729/208846/19347/56419/210293/227743/18479/58869/213783/243725/29809/109905/83671/98910
C3	Late-down	GO	MF	GO:0031267	small GTPase binding	13/178	272/17195	5.28e-06	0.00048751	72729/208846/19347/56419/210293/227743/18479/58869/213783/29809/109905/83671/98910
C3	Late-down	GO	MF	GO:0008013	beta-catenin binding	6/178	82/17195	0.000206508	0.0142154	12558/216033/329650/66743/21413/21872
C3	Late-down	GO	MF	GO:0015631	tubulin binding	12/178	344/17195	0.00025212	0.0142154	76499/70762/103967/54418/320191/16553/16554/17762/18479/18578/320244/70892
C3	Late-down	GO	MF	GO:0051015	actin filament binding	9/178	203/17195	0.000269669	0.0142154	11350/231148/11518/76499/94040/216033/243725/71653/64009
C3	Late-down	GO	MF	GO:0019902	phosphatase binding	9/178	212/17195	0.000370997	0.0171122	218038/12558/13527/14673/17762/243725/14083/83671/232341
C3	Late-down	GO	MF	GO:0004115	3',5'-cyclic-AMP phosphodiesterase activity	3/178	15/17195	0.000452846	0.0185667	18578/238871/18584
C3	Late-down	GO	MF	GO:0045296	cadherin binding	5/178	66/17195	0.000602782	0.0222426	11735/320873/227485/12558/216033
C3	Late-down	GO	MF	GO:0008432	JUN kinase binding	3/178	17/17195	0.000666548	0.0223596	63953/70686/14083
C3	Late-down	GO	MF	GO:0042169	SH2 domain binding	4/178	42/17195	0.000914126	0.0281094	11350/13131/16590/14083
C3	Late-down	GO	MF	GO:0042578	phosphoric ester hydrolase activity	10/178	318/17195	0.00179537	0.0460493	72685/63953/70686/18606/18578/238871/18584/75769/14083/19266
C3	Late-down	GO	MF	GO:0004114	3',5'-cyclic-nucleotide phosphodiesterase activity	3/178	24/17195	0.00188115	0.0460493	18578/238871/18584
C3	Late-down	GO	MF	GO:0004725	protein tyrosine phosphatase activity	5/178	86/17195	0.00198979	0.0460493	72685/63953/70686/14083/19266
C3	Late-down	GO	MF	GO:0004713	protein tyrosine kinase activity	6/178	126/17195	0.00199917	0.0460493	11350/13869/14183/15258/16590/14083
C3	Late-down	GO	MF	GO:0008066	glutamate receptor activity	3/178	25/17195	0.00212151	0.0460493	14802/14806/108073
C3	Late-down	GO	MF	GO:0004112	cyclic-nucleotide phosphodiesterase activity	3/178	26/17195	0.00238012	0.0487924	18578/238871/18584
C4	Early-down	GO	BP	GO:0007272	ensheathment of neurons	17/198	160/17275	4.18e-12	5.56e-09	319903/18417/12805/13867/338521/53897/192897/17136/17153/17196/50913/67801/19242/20665/23966/72160/70747
C4	Early-down	GO	BP	GO:0008366	axon ensheathment	17/198	160/17275	4.18e-12	5.56e-09	319903/18417/12805/13867/338521/53897/192897/17136/17153/17196/50913/67801/19242/20665/23966/72160/70747
C4	Early-down	GO	BP	GO:0042552	myelination	16/198	158/17275	3.81e-11	2.87e-08	319903/12805/13867/338521/53897/192897/17136/17153/17196/50913/67801/19242/20665/23966/72160/70747
C4	Early-down	GO	BP	GO:0048709	oligodendrocyte differentiation	14/198	113/17275	4.32e-11	2.87e-08	319903/11484/12799/12805/338521/17136/17153/18088/50913/226115/19242/20665/23966/70747
C4	Early-down	GO	BP	GO:0042063	gliogenesis	22/198	364/17275	2.14e-10	1.13e-07	319903/14766/11484/30948/76893/12799/12805/13867/338521/192897/17136/17153/17984/18088/50913/226115/67916/28000/19242/20665/23966/70747
C4	Early-down	GO	BP	GO:0010001	glial cell differentiation	19/198	267/17275	2.55e-10	1.13e-07	319903/11484/30948/12799/12805/13867/338521/192897/17136/17153/18088/50913/226115/67916/28000/19242/20665/23966/70747
C4	Early-down	GO	BP	GO:0016126	sterol biosynthetic process	9/198	48/17275	3.24e-09	1.23e-06	13121/74754/58520/15357/208715/319554/66234/235293/20775
C4	Early-down	GO	BP	GO:0022010	central nervous system myelination	7/198	28/17275	2.26e-08	6.67e-06	319903/12805/338521/17136/17153/20665/23966
C4	Early-down	GO	BP	GO:0032291	axon ensheathment in central nervous system	7/198	28/17275	2.26e-08	6.67e-06	319903/12805/338521/17136/17153/20665/23966
C4	Early-down	GO	BP	GO:0014003	oligodendrocyte development	8/198	46/17275	4.65e-08	1.24e-05	319903/12805/338521/17136/17153/18088/20665/23966
C4	Early-down	GO	BP	GO:0061564	axon development	22/198	496/17275	6.21e-08	1.5e-05	11461/11465/11603/12424/76893/12799/12805/12305/13643/16476/16897/17136/17196/23945/17984/50913/106042/19242/19280/108151/20616/70747
C4	Early-down	GO	BP	GO:0045687	positive regulation of glial cell differentiation	8/198	53/17275	1.47e-07	3.27e-05	11484/30948/17136/18088/50913/28000/19242/23966
C4	Early-down	GO	BP	GO:0016125	sterol metabolic process	11/198	129/17275	2.78e-07	5.7e-05	13116/13121/67800/74754/58520/15357/208715/319554/66234/235293/20775
C4	Early-down	GO	BP	GO:0021782	glial cell development	11/198	131/17275	3.25e-07	6.18e-05	319903/12805/13867/338521/192897/17136/17153/18088/20665/23966/70747
C4	Early-down	GO	BP	GO:0014015	positive regulation of gliogenesis	9/198	85/17275	5.53e-07	9.79e-05	11484/30948/17136/18088/50913/28000/19242/20665/23966
C4	Early-down	GO	BP	GO:0006695	cholesterol biosynthetic process	7/198	44/17275	6.25e-07	9.79e-05	13121/74754/15357/208715/319554/66234/235293
C4	Early-down	GO	BP	GO:1902653	secondary alcohol biosynthetic process	7/198	44/17275	6.25e-07	9.79e-05	13121/74754/15357/208715/319554/66234/235293
C4	Early-down	GO	BP	GO:1901617	organic hydroxy compound biosynthetic process	13/198	204/17275	6.75e-07	9.98e-05	58226/13121/74754/58520/14763/15357/208715/319554/66234/216134/235293/20773/20775
C4	Early-down	GO	BP	GO:0045685	regulation of glial cell differentiation	9/198	91/17275	9.92e-07	0.000138888	11484/30948/17136/18088/50913/226115/28000/19242/23966
C4	Early-down	GO	BP	GO:0008203	cholesterol metabolic process	10/198	119/17275	1.12e-06	0.000149342	13116/13121/67800/74754/15357/208715/319554/66234/235293/20775
C4	Early-down	GO	BP	GO:1902652	secondary alcohol metabolic process	10/198	129/17275	2.35e-06	0.000297732	13116/13121/67800/74754/15357/208715/319554/66234/235293/20775
C4	Early-down	GO	BP	GO:0014013	regulation of gliogenesis	10/198	132/17275	2.89e-06	0.000350093	11484/30948/76893/17136/18088/50913/28000/19242/20665/23966
C4	Early-down	GO	BP	GO:0006694	steroid biosynthetic process	10/198	137/17275	4.05e-06	0.000468295	58226/13121/74754/58520/15357/208715/319554/66234/235293/20775
C4	Early-down	GO	BP	GO:1901615	organic hydroxy compound metabolic process	18/198	454/17275	5.09e-06	0.00056486	58226/13039/13116/13121/67800/74754/58520/56209/14763/15357/208715/319554/66234/216134/67916/235293/20773/20775
C4	Early-down	GO	BP	GO:0006066	alcohol metabolic process	14/198	288/17275	6.15e-06	0.000654321	58226/13116/13121/67800/74754/56209/15357/208715/319554/66234/67916/235293/20773/20775
C4	Early-down	GO	BP	GO:0046165	alcohol biosynthetic process	9/198	119/17275	9.29e-06	0.000950716	58226/13121/74754/15357/208715/319554/66234/235293/20773
C4	Early-down	GO	BP	GO:0008202	steroid metabolic process	13/198	265/17275	1.21e-05	0.00117522	58226/13116/13121/67800/74754/58520/15357/208715/319554/66234/101476/235293/20775
C4	Early-down	GO	BP	GO:1900242	regulation of synaptic vesicle endocytosis	5/198	27/17275	1.24e-05	0.00117522	11461/11465/56807/20616/229521
C4	Early-down	GO	BP	GO:0048714	positive regulation of oligodendrocyte differentiation	5/198	31/17275	2.51e-05	0.00230091	11484/18088/50913/19242/23966
C4	Early-down	GO	BP	GO:0048713	regulation of oligodendrocyte differentiation	6/198	54/17275	3.43e-05	0.0030463	11484/18088/50913/226115/19242/23966
C4	Early-down	GO	BP	GO:1903421	regulation of synaptic vesicle recycling	5/198	35/17275	4.62e-05	0.00396236	11461/11465/56807/20616/229521
C4	Early-down	GO	BP	GO:0007409	axonogenesis	16/198	444/17275	5.5e-05	0.00457082	11461/11465/11603/12424/12799/12805/13643/16897/17136/17196/23945/17984/106042/19280/108151/20616
C4	Early-down	GO	BP	GO:0046847	filopodium assembly	6/198	68/17275	0.000127437	0.010276	11603/69710/14086/192897/18753/57776
C4	Early-down	GO	BP	GO:0048488	synaptic vesicle endocytosis	6/198	72/17275	0.000175143	0.013138	11461/11465/30948/56807/20616/229521
C4	Early-down	GO	BP	GO:0032288	myelin assembly	4/198	25/17275	0.000175365	0.013138	12805/192897/17136/23966
C4	Early-down	GO	BP	GO:0050767	regulation of neurogenesis	15/198	441/17275	0.000177741	0.013138	11484/30948/76893/13643/17136/17196/18088/50913/28000/19242/19280/108151/20616/20665/23966
C4	Early-down	GO	BP	GO:0140238	presynaptic endocytosis	6/198	75/17275	0.000219401	0.0157791	11461/11465/30948/56807/20616/229521
C4	Early-down	GO	BP	GO:0031103	axon regeneration	5/198	50/17275	0.000262137	0.0183565	76893/16476/17136/19242/19280
C4	Early-down	GO	BP	GO:1990138	neuron projection extension	9/198	189/17275	0.000337727	0.0230434	12305/17136/23945/17984/106042/19280/19415/116838/108151
C4	Early-down	GO	BP	GO:0036465	synaptic vesicle recycling	6/198	82/17275	0.000357085	0.0237551	11461/11465/30948/56807/20616/229521
C4	Early-down	GO	BP	GO:0010927	cellular component assembly involved in morphogenesis	7/198	121/17275	0.000490506	0.0297431	11465/12632/12805/192897/17136/102693/23966
C4	Early-down	GO	BP	GO:0048708	astrocyte differentiation	6/198	87/17275	0.000491198	0.0297431	30948/17136/18088/67916/28000/70747
C4	Early-down	GO	BP	GO:0006677	glycosylceramide metabolic process	3/198	14/17275	0.000491806	0.0297431	338521/53897/18753
C4	Early-down	GO	BP	GO:1900025	negative regulation of substrate adhesion-dependent cell spreading	3/198	14/17275	0.000491806	0.0297431	12927/23790/107351
C4	Early-down	GO	BP	GO:0042698	ovulation cycle	5/198	58/17275	0.000526471	0.0307523	101476/19242/19275/21930/22174
C4	Early-down	GO	BP	GO:0050768	negative regulation of neurogenesis	8/198	161/17275	0.000544352	0.0307523	76893/13643/17136/17196/19242/19280/108151/20665
C4	Early-down	GO	BP	GO:0006672	ceramide metabolic process	6/198	89/17275	0.000554668	0.0307523	76893/338521/53897/67916/18753/20773
C4	Early-down	GO	BP	GO:0046467	membrane lipid biosynthetic process	7/198	124/17275	0.000568194	0.0307523	76893/338521/53897/30963/14755/18753/20773
C4	Early-down	GO	BP	GO:0031102	neuron projection regeneration	5/198	59/17275	0.000569928	0.0307523	76893/16476/17136/19242/19280
C4	Early-down	GO	BP	GO:0030148	sphingolipid biosynthetic process	6/198	90/17275	0.000588703	0.0307523	76893/338521/53897/30963/18753/20773
C4	Early-down	GO	BP	GO:0044283	small molecule biosynthetic process	15/198	494/17275	0.00058939	0.0307523	58226/13121/67800/74754/338521/14431/30963/15357/208715/319554/23945/66234/216134/235293/20773
C4	Early-down	GO	BP	GO:0048711	positive regulation of astrocyte differentiation	3/198	15/17275	0.000609583	0.0311942	30948/17136/28000
C4	Early-down	GO	BP	GO:0046513	ceramide biosynthetic process	5/198	61/17275	0.000664856	0.0333808	76893/338521/53897/18753/20773
C4	Early-down	GO	BP	GO:0009611	response to wounding	14/198	449/17275	0.000693212	0.0341599	11465/76893/12305/192897/16476/107351/17136/18791/67916/18753/19242/19280/229521/22174
C4	Early-down	GO	BP	GO:0051961	negative regulation of nervous system development	8/198	169/17275	0.000748844	0.0362304	76893/13643/17136/17196/19242/19280/108151/20665
C4	Early-down	GO	BP	GO:0006665	sphingolipid metabolic process	7/198	131/17275	0.000787745	0.0374319	76893/338521/53897/30963/67916/18753/20773
C4	Early-down	GO	BP	GO:0006643	membrane lipid metabolic process	8/198	171/17275	0.00080858	0.0377479	76893/338521/53897/30963/14755/67916/18753/20773
C4	Early-down	GO	BP	GO:0007163	establishment or maintenance of cell polarity	9/198	214/17275	0.000827877	0.0379824	11461/13191/14086/227753/107351/16897/106042/69581/20616
C4	Early-down	GO	BP	GO:0050771	negative regulation of axonogenesis	5/198	65/17275	0.000889641	0.0401243	13643/17136/17196/19280/108151
C4	Early-down	GO	CC	GO:0043209	myelin sheath	17/203	187/17300	7.48e-11	2.67e-08	11461/11465/12509/18417/12799/12805/14086/14693/227753/140559/16897/17136/17153/17196/17441/67801/70747
C4	Early-down	GO	CC	GO:0044304	main axon	9/203	85/17300	6.73e-07	0.000120172	30948/12424/54393/16485/213469/17136/17196/23945/20273
C4	Early-down	GO	CC	GO:0042734	presynaptic membrane	13/203	217/17300	1.76e-06	0.000192248	58226/12805/13643/54393/14800/16485/17357/219228/19280/116838/20273/20616/229521
C4	Early-down	GO	CC	GO:0043218	compact myelin	5/203	19/17300	2.15e-06	0.000192248	12509/17136/17153/17196/67801
C4	Early-down	GO	CC	GO:0008021	synaptic vesicle	13/203	236/17300	4.46e-06	0.000277982	30948/54393/14800/16570/213469/17357/19280/19341/56807/20616/72003/229521/72160
C4	Early-down	GO	CC	GO:0098685	Schaffer collateral - CA1 synapse	10/203	136/17300	4.67e-06	0.000277982	11461/11465/54393/14800/18791/19242/19280/11852/20616/229521
C4	Early-down	GO	CC	GO:0070382	exocytic vesicle	13/203	255/17300	1.03e-05	0.000525078	30948/54393/14800/16570/213469/17357/19280/19341/56807/20616/72003/229521/72160
C4	Early-down	GO	CC	GO:0030133	transport vesicle	14/203	332/17300	3.92e-05	0.0017502	30948/58520/54393/14800/16570/213469/17357/19280/19341/56807/20616/72003/229521/72160
C4	Early-down	GO	CC	GO:0150034	distal axon	14/203	362/17300	9.91e-05	0.00393184	11461/11465/11603/30948/12424/14086/14800/16485/16570/19275/20616/229521/21858/243931
C4	Early-down	GO	CC	GO:0044306	neuron projection terminus	10/203	203/17300	0.000145808	0.00520534	11461/11465/30948/12424/14800/16485/19275/20284/20616/229521
C4	Early-down	GO	CC	GO:0030672	synaptic vesicle membrane	8/203	134/17300	0.000184557	0.00549056	30948/14800/19280/19341/56807/72003/229521/72160
C4	Early-down	GO	CC	GO:0099501	exocytic vesicle membrane	8/203	134/17300	0.000184557	0.00549056	30948/14800/19280/19341/56807/72003/229521/72160
C4	Early-down	GO	CC	GO:0043194	axon initial segment	4/203	28/17300	0.00030218	0.00775393	30948/12424/16485/20273
C4	Early-down	GO	CC	GO:0043679	axon terminus	9/203	182/17300	0.000304076	0.00775393	11461/11465/30948/12424/14800/16485/19275/20616/229521
C4	Early-down	GO	CC	GO:0045211	postsynaptic membrane	12/203	320/17300	0.000411751	0.00919432	58226/12805/13643/13867/54393/14800/192897/16485/219228/19280/20273/20616
C4	Early-down	GO	CC	GO:0097060	synaptic membrane	15/203	466/17300	0.00041207	0.00919432	58226/12805/13643/13867/54393/14800/192897/16485/17357/219228/19280/116838/20273/20616/229521
C4	Early-down	GO	CC	GO:0048787	presynaptic active zone membrane	5/203	61/17300	0.000739243	0.0155241	58226/14800/20273/20616/229521
C4	Early-down	GO	CC	GO:0030658	transport vesicle membrane	8/203	174/17300	0.00105352	0.0208948	30948/14800/19280/19341/56807/72003/229521/72160
C4	Early-down	GO	CC	GO:0048786	presynaptic active zone	6/203	113/17300	0.00216476	0.0406747	58226/14800/116838/20273/20616/229521
C4	Early-down	KEGG	Lipid metabolism	mmu00100	Steroid biosynthesis - Mus musculus (house mouse)	1995-05-01	16/6581	2.17e-06	0.000404034	13121/74754/66234/235293/20775
