# Supplementary material for: Single-nucleus multiomic profiling of the aging mouse substantia nigra reveals conserved gene alterations linked to Parkinson's disease
Source: HighWire-hosted journal article supplement (doi:10.1101/gr.281113.125), 2026-04
Supplement: Supplemental_Table_S4.xlsx [file Supplemental_Table_S4.xlsx]

## Sheet: Supplemental_Table_S4
Supplemental Table S4: Motif enrichment analysis of the age-associated DACs in oligodendrocytes
DAC group	Group name	Motif name	Motif family	experiment	accession	database	consensus	p-value	fdr	target_num	target_pct	background_num	background_pct	log_odds_detection
C1	Late-up	GRE	NR,IR3	RAW264.7-GRE-ChIP-Seq	Unpublished	Homer	VAGRACAKWCTGTYC	1e-45	0	116	0.2353	2360.9	0.0482	7.80986
C1	Late-up	GRE	NR,IR3	A549-GR-ChIP-Seq	GSE32465	Homer	NRGVACABNVTGTYCY	1e-44	0	90	0.1826	1371.9	0.028	7.9144
C1	Late-up	PGR	NR	EndoStromal-PGR-ChIP-Seq	GSE69539	Homer	AAGAACATWHTGTTC	1e-34	0	93	0.1886	1995.8	0.0407	7.11747
C1	Late-up	ARE	NR	LNCAP-AR-ChIP-Seq	GSE27824	Homer	RGRACASNSTGTYCYB	1e-31	0	114	0.2312	3247.5	0.0662	7.77899
C1	Late-up	NF1	CTF	LNCAP-NF1-ChIP-Seq	Unpublished	Homer	CYTGGCABNSTGCCAR	1e-10	0	101	0.2049	5120.6	0.1044	7.59834
C1	Late-up	NF1-halfsite	CTF	LNCaP-NF1-ChIP-Seq	Unpublished	Homer	YTGCCAAG	1e-08	0	267	0.5416	19951.7	0.4069	6.73433
C1	Late-up	Sox6	HMG	Myotubes-Sox6-ChIP-Seq	GSE32627	Homer	CCATTGTTNY	1e-08	0	203	0.4118	14112.1	0.2878	6.33114
C1	Late-up	FOXK1	Forkhead	HEK293-FOXK1-ChIP-Seq	GSE51673	Homer	NVWTGTTTAC	1e-08	0	133	0.2698	8081.1	0.1648	6.33705
C1	Late-up	Foxo3	Forkhead	U2OS-Foxo3-ChIP-Seq	E-MTAB-2701	Homer	DGTAAACA	1e-08	0	101	0.2049	5623	0.1147	4.67304
C1	Late-up	Sox2	HMG	mES-Sox2-ChIP-Seq	GSE11431	Homer	BCCATTGTTC	1e-08	0	135	0.2738	8407	0.1715	6.78547
C1	Late-up	Sox15	HMG	CPA-Sox15-ChIP-Seq	GSE62909	Homer	RAACAATGGN	1e-07	0	151	0.3063	9898.4	0.2019	7.12231
C1	Late-up	PR	NR	T47D-PR-ChIP-Seq	GSE31130	Homer	VAGRACAKNCTGTBC	1e-07	0	286	0.5801	22477	0.4584	5.62734
C1	Late-up	OCT:OCT	POU,Homeobox	NPC-Brn1-ChIP-Seq	GSE35496	Homer	ATGAATATTCATGAG	1e-06	0	8	0.0162	63.1	0.0013	12.3184
C1	Late-up	Sp5	Zf	mES-Sp5.Flag-ChIP-Seq	GSE72989	Homer	RGKGGGCGGAGC	1e-06	0	220	0.4462	16626.1	0.3391	6.51975
C1	Late-up	Sox4	HMG	proB-Sox4-ChIP-Seq	GSE50066	Homer	YCTTTGTTCC	1e-06	0	128	0.2596	8415.8	0.1716	7.06867
C1	Late-up	Sox3	HMG	NPC-Sox3-ChIP-Seq	GSE33059	Homer	CCWTTGTY	1e-05	0	210	0.426	15904.9	0.3244	6.56384
C1	Late-up	Sox17	HMG	Endoderm-Sox17-ChIP-Seq	GSE61475	Homer	CCATTGTTYB	1e-05	0	104	0.211	6590.3	0.1344	6.82454
C1	Late-up	AR-halfsite	NR	LNCaP-AR-ChIP-Seq	GSE27824	Homer	CCAGGAACAG	1e-05	0.0002	404	0.8195	36083.6	0.7359	5.19383
C1	Late-up	FOXK2	Forkhead	U2OS-FOXK2-ChIP-Seq	E-MTAB-2204	Homer	SCHTGTTTACAT	0.0001	0.0003	84	0.1704	5220.5	0.1065	7.29725
C1	Late-up	Sp2	Zf	HEK293-Sp2.eGFP-ChIP-Seq	Encode	Homer	YGGCCCCGCCCC	0.0001	0.0003	269	0.5456	22055.2	0.4498	5.66256
C1	Late-up	Foxf1	Forkhead	Lung-Foxf1-ChIP-Seq	GSE77951	Homer	WWATRTAAACAN	0.0001	0.0003	105	0.213	6977.1	0.1423	6.34862
C1	Late-up	Tcf21	bHLH	ArterySmoothMuscle-Tcf21-ChIP-Seq	GSE61369	Homer	NAACAGCTGG	0.0001	0.0003	163	0.3306	12060.3	0.246	6.46026
C1	Late-up	Sox10	HMG	SciaticNerve-Sox3-ChIP-Seq	GSE35132	Homer	CCWTTGTYYB	0.0001	0.0003	200	0.4057	15497.6	0.3161	6.6401
C1	Late-up	Tlx?	NR	NPC-H3K4me1-ChIP-Seq	GSE16256	Homer	CTGGCAGSCTGCCA	0.0001	0.0003	90	0.1826	5787.2	0.118	7.86509
C1	Late-up	Nur77	NR	K562-NR4A1-ChIP-Seq	GSE31363	Homer	TGACCTTTNCNT	0.0001	0.0004	33	0.0669	1474.6	0.0301	8.73646
C1	Late-up	Sox9	HMG	Limb-SOX9-ChIP-Seq	GSE73225	Homer	AGGVNCCTTTGT	0.0001	0.0005	128	0.2596	9080.9	0.1852	7.19245
C1	Late-up	FOXP1	Forkhead	H9-FOXP1-ChIP-Seq	GSE31006	Homer	NYYTGTTTACHN	0.0001	0.0005	59	0.1197	3379.8	0.0689	7.72718
C1	Late-up	FoxL2	Forkhead	Ovary-FoxL2-ChIP-Seq	GSE60858	Homer	WWTRTAAACAVG	0.0001	0.0007	95	0.1927	6334.7	0.1292	6.23236
C1	Late-up	Sp1	Zf	Promoter	NA	Homer	GGCCCCGCCCCC	0.0001	0.0012	90	0.1826	6014.4	0.1227	8.68507
C1	Late-up	Mef2b	MADS	HEK293-Mef2b.V5-ChIP-Seq	GSE67450	Homer	GCTATTTTTGGM	0.001	0.0015	89	0.1805	5977.5	0.1219	6.85072
C1	Late-up	Tcf12	bHLH	GM12878-Tcf12-ChIP-Seq	GSE32465	Homer	VCAGCTGYTG	0.001	0.0022	165	0.3347	12788.6	0.2608	7.14623
C1	Late-up	Mef2c	MADS	GM12878-Mef2c-ChIP-Seq	GSE32465	Homer	DCYAAAAATAGM	0.001	0.0028	48	0.0974	2775.4	0.0566	7.87448
C1	Late-up	Pit1	Homeobox	GCrat-Pit1-ChIP-Seq	GSE58009	Homer	ATGMATATDC	0.001	0.0033	100	0.2028	7085.9	0.1445	6.40158
C1	Late-up	Bach2	bZIP	OCILy7-Bach2-ChIP-Seq	GSE44420	Homer	TGCTGAGTCA	0.001	0.0043	34	0.069	1782.7	0.0364	8.69735
C1	Late-up	SCL	bHLH	HPC7-Scl-ChIP-Seq	GSE13511	Homer	AVCAGCTG	0.001	0.0049	428	0.8682	39735.2	0.8104	5.10049
C1	Late-up	Stat3	Stat	mES-Stat3-ChIP-Seq	GSE11431	Homer	CTTCCGGGAA	0.001	0.0049	81	0.1643	5551.2	0.1132	7.06388
C1	Late-up	Brn2	POU,Homeobox	NPC-Brn2-ChIP-Seq	GSE35496	Homer	ATGAATATTC	0.001	0.0054	15	0.0304	540.5	0.011	9.45437
C1	Late-up	KLF14	Zf	HEK293-KLF14.GFP-ChIP-Seq	GSE58341	Homer	RGKGGGCGKGGC	0.001	0.0056	291	0.5903	25277.4	0.5155	6.33053
C1	Late-up	KLF3	Zf	MEF-Klf3-ChIP-Seq	GSE44748	Homer	NRGCCCCRCCCHBNN	0.001	0.0065	123	0.2495	9293.9	0.1896	5.50528
C1	Late-up	Myf5	bHLH	GM-Myf5-ChIP-Seq	GSE24852	Homer	BAACAGCTGT	0.001	0.0065	120	0.2434	9028.6	0.1841	7.32271
C1	Late-up	Fra2	bZIP	Striatum-Fra2-ChIP-Seq	GSE43429	Homer	GGATGACTCATC	0.001	0.0068	61	0.1237	3967.3	0.0809	6.38445
C1	Late-up	NFY	CCAAT	Promoter	NA	Homer	RGCCAATSRG	0.001	0.0068	120	0.2434	9053.7	0.1847	4.70551
C1	Late-up	NFIL3	bZIP	HepG2-NFIL3-ChIP-Seq	Encode	Homer	VTTACGTAAYNNNNN	0.001	0.0068	63	0.1278	4137.9	0.0844	6.41388
C1	Late-up	BATF	bZIP	Th17-BATF-ChIP-Seq	GSE39756	Homer	DATGASTCAT	0.001	0.0081	76	0.1542	5261.1	0.1073	6.40806
C1	Late-up	Ap4	bHLH	AML-Tfap4-ChIP-Seq	GSE45738	Homer	NAHCAGCTGD	0.001	0.0082	185	0.3753	15113.4	0.3082	6.11698
C1	Late-up	JunB	bZIP	DendriticCells-Junb-ChIP-Seq	GSE36099	Homer	RATGASTCAT	0.001	0.0089	66	0.1339	4445.9	0.0907	6.68931
C1	Late-up	Oct6	POU,Homeobox	NPC-Pou3f1-ChIP-Seq	GSE35496	Homer	WATGCAAATGAG	0.01	0.0089	50	0.1014	3139.4	0.064	7.88155
C1	Late-up	Foxo1	Forkhead	RAW-Foxo1-ChIP-Seq	Fan_et_al.	Homer	CTGTTTAC	0.01	0.011	210	0.426	17606.3	0.3591	6.16467
C1	Late-up	FOXM1	Forkhead	MCF7-FOXM1-ChIP-Seq	GSE72977	Homer	TRTTTACTTW	0.01	0.011	114	0.2312	8668.8	0.1768	7.164
C1	Late-up	Foxa2	Forkhead	Liver-Foxa2-ChIP-Seq	GSE25694	Homer	CYTGTTTACWYW	0.01	0.0123	89	0.1805	6488.2	0.1323	6.53541
C1	Late-up	Mef2d	MADS	Retina-Mef2d-ChIP-Seq	GSE61391	Homer	GCTATTTTTAGC	0.01	0.0123	23	0.0467	1139.7	0.0232	8.64724
C1	Late-up	Maz	Zf	HepG2-Maz-ChIP-Seq	GSE31477	Homer	GGGGGGGG	0.01	0.014	246	0.499	21208.4	0.4326	7.47877
C1	Late-up	Atf3	bZIP	GBM-ATF3-ChIP-Seq	GSE33912	Homer	DATGASTCATHN	0.01	0.0148	74	0.1501	5242.9	0.1069	5.97965
C1	Late-up	CEBP	bZIP	ThioMac-CEBPb-ChIP-Seq	GSE21512	Homer	ATTGCGCAAC	0.01	0.0181	66	0.1339	4604.2	0.0939	6.12841
C1	Late-up	Ets1-distal	ETS	CD4+-PolII-ChIP-Seq	Barski_et_al.	Homer	MACAGGAAGT	0.01	0.0181	50	0.1014	3272	0.0667	8.63796
C1	Late-up	Etv2	ETS	ES-ER71-ChIP-Seq	GSE59402	Homer	NNAYTTCCTGHN	0.01	0.0225	132	0.2677	10530.5	0.2148	7.21376
C1	Late-up	Znf263	Zf	K562-Znf263-ChIP-Seq	GSE31477	Homer	CVGTSCTCCC	0.01	0.0226	268	0.5436	23582.8	0.481	3.87722
C1	Late-up	CTCF	Zf	CD4+-CTCF-ChIP-Seq	Barski_et_al.	Homer	AYAGTGCCMYCTRGTGGCCA	0.01	0.0228	33	0.0669	1960	0.04	8.70484
C1	Late-up	Rfx6	HTH	Min6b1-Rfx6.HA-ChIP-Seq	GSE62844	Homer	TGTTKCCTAGCAACM	0.01	0.0236	162	0.3286	13350	0.2723	3.33026
C1	Late-up	COUP-TFII	NR	K562-NR2F1-ChIP-Seq	Encode	Homer	GKBCARAGGTCA	0.01	0.0295	188	0.3813	15894.6	0.3242	6.40604
C1	Late-up	MyoG	bHLH	C2C12-MyoG-ChIP-Seq	GSE36024	Homer	AACAGCTG	0.01	0.0326	164	0.3327	13654.9	0.2785	6.58794
C1	Late-up	Atoh1	bHLH	Cerebellum-Atoh1-ChIP-Seq	GSE22111	Homer	VNRVCAGCTGGY	0.01	0.035	163	0.3306	13589.4	0.2772	6.0307
C1	Late-up	MyoD	bHLH	Myotube-MyoD-ChIP-Seq	GSE21614	Homer	RRCAGCTGYTSY	0.01	0.036	132	0.2677	10710	0.2184	7.24983
C1	Late-up	NF-E2	bZIP	K562-NFE2-ChIP-Seq	GSE31477	Homer	GATGACTCAGCA	0.01	0.0373	12	0.0243	504.8	0.0103	9.74838
C1	Late-up	Tgif2	Homeobox	mES-Tgif2-ChIP-Seq	GSE55404	Homer	TGTCANYT	0.01	0.0373	320	0.6491	29056.2	0.5926	5.21446
C1	Late-up	Brn1	POU,Homeobox	NPC-Brn1-ChIP-Seq	GSE35496	Homer	TATGCWAATBAV	0.01	0.0571	36	0.073	2352.7	0.048	8.42113
C1	Late-up	KLF5	Zf	LoVo-KLF5-ChIP-Seq	GSE49402	Homer	DGGGYGKGGC	0.01	0.0582	226	0.4584	19867.2	0.4052	6.67009
C1	Late-up	PAX5	Paired,Homeobox	GM12878-PAX5-ChIP-Seq	GSE32465	Homer	GCAGCCAAGCRTGACH	0.1	0.0629	66	0.1339	4923.5	0.1004	7.20944
C1	Late-up	RORg	NR	Liver-Rorc-ChIP-Seq	GSE101115	Homer	WAABTAGGTCAV	0.1	0.0633	15	0.0304	753.4	0.0154	9.09674
C1	Late-up	Hoxa10	Homeobox	ChickenMSG-Hoxa10.Flag-ChIP-Seq	GSE86088	Homer	GGYAATGAAA	0.1	0.0647	59	0.1197	4326	0.0882	7.08661
C1	Late-up	MITF	bHLH	MastCells-MITF-ChIP-Seq	GSE48085	Homer	RTCATGTGAC	0.1	0.0653	120	0.2434	9829.4	0.2005	6.35457
C1	Late-up	Bcl11a	Zf	HSPC-BCL11A-ChIP-Seq	GSE104676	Homer	TYTGACCASWRG	0.1	0.0751	101	0.2049	8129.8	0.1658	7.30715
C1	Late-up	Oct4:Sox17	POU,Homeobox,HMG	F9-Sox17-ChIP-Seq	GSE44553	Homer	CCATTGTATGCAAAT	0.1	0.0751	18	0.0365	994.6	0.0203	8.78869
C1	Late-up	FoxD3	forkhead	ZebrafishEmbryo-Foxd3.biotin-ChIP-seq	GSE106676	Homer	TGTTTAYTTAGC	0.1	0.0751	95	0.1927	7589.8	0.1548	7.33682
C1	Late-up	Oct11	POU,Homeobox	NCIH1048-POU2F3-ChIP-seq	GSE115123	Homer	GATTTGCATA	0.1	0.0751	34	0.069	2254.2	0.046	6.63361
C1	Late-up	Foxa3	Forkhead	Liver-Foxa3-ChIP-Seq	GSE77670	Homer	BSNTGTTTACWYWGN	0.1	0.0751	37	0.0751	2502.4	0.051	8.40103
C1	Late-up	HLF	bZIP	HSC-HLF.Flag-ChIP-Seq	GSE69817	Homer	RTTATGYAAB	0.1	0.0766	70	0.142	5357.4	0.1093	6.20931
C1	Late-up	Oct4	POU,Homeobox	mES-Oct4-ChIP-Seq	GSE11431	Homer	ATTTGCATAW	0.1	0.0797	47	0.0953	3364.6	0.0686	7.32558
C1	Late-up	Fra1	bZIP	BT549-Fra1-ChIP-Seq	GSE46166	Homer	NNATGASTCATH	0.1	0.0797	59	0.1197	4404.5	0.0898	7.01174
C1	Late-up	AP-1	bZIP	ThioMac-PU.1-ChIP-Seq	GSE21512	Homer	VTGACTCATC	0.1	0.0858	78	0.1582	6112.5	0.1247	6.04954
C1	Late-up	Oct2	POU,Homeobox	Bcell-Oct2-ChIP-Seq	GSE21512	Homer	ATATGCAAAT	0.1	0.0891	30	0.0609	1970.5	0.0402	7.58112
C1	Late-up	Nrf2	bZIP	Lymphoblast-Nrf2-ChIP-Seq	GSE37589	Homer	HTGCTGAGTCAT	0.1	0.0893	10	0.0203	452	0.0092	9.792
C1	Late-up	Hoxd11	Homeobox	ChickenMSG-Hoxd11.Flag-ChIP-Seq	GSE86088	Homer	VGCCATAAAA	0.1	0.092	208	0.4219	18392.6	0.3751	5.52848
C1	Late-up	FOXA1	Forkhead	MCF7-FOXA1-ChIP-Seq	GSE26831	Homer	WAAGTAAACA	0.1	0.0925	98	0.1988	7966.1	0.1625	6.56811
C1	Late-up	Fox:Ebox	Forkhead,bHLH	Panc1-Foxa2-ChIP-Seq	GSE47459	Homer	NNNVCTGWGYAAACASN	0.1	0.0935	116	0.2353	9637.2	0.1966	7.01059
C1	Late-up	Meis1	Homeobox	MastCells-Meis1-ChIP-Seq	GSE48085	Homer	VGCTGWCAVB	0.1	0.0941	210	0.426	18611.9	0.3796	6.3078
C1	Late-up	PPARE	NR,DR1	3T3L1-Pparg-ChIP-Seq	GSE13511	Homer	TGACCTTTGCCCCA	0.1	0.1035	134	0.2718	11368.4	0.2319	6.96882
C1	Late-up	CDX4	Homeobox	ZebrafishEmbryos-Cdx4.Myc-ChIP-Seq	GSE48254	Homer	NGYCATAAAWCH	0.1	0.1055	81	0.1643	6470.8	0.132	6.82675
C1	Late-up	LXRE	NR,DR4	RAW-LXRb.biotin-ChIP-Seq	GSE21512	Homer	RGGTTACTANAGGTCA	0.1	0.1055	10	0.0203	470.6	0.0096	9.09992
C1	Late-up	Lhx2	Homeobox	HFSC-Lhx2-ChIP-Seq	GSE48068	Homer	TAATTAGN	0.1	0.1055	96	0.1947	7841.5	0.1599	6.1087
C1	Late-up	Twist	bHLH	HMLE-TWIST1-ChIP-Seq	Chang_et_al	Homer	VCAKCTGGNNNCCAGMTGBN	0.1	0.1055	25	0.0507	1605.6	0.0327	9.10017
C1	Late-up	Atf7	bZIP	3T3L1-Atf7-ChIP-Seq	GSE56872	Homer	NGRTGACGTCAY	0.1	0.1055	57	0.1156	4331.3	0.0883	6.73534
C1	Late-up	ZNF341	Zf	EBV-ZNF341-ChIP-Seq	GSE113194	Homer	GGAACAGCCG	0.1	0.1077	114	0.2312	9532.1	0.1944	7.22693
C1	Late-up	Twist2	bHLH	Myoblast-Twist2.Ty1-ChIP-Seq	GSE127998	Homer	MCAGCTGBYH	0.1	0.1123	226	0.4584	20295.9	0.4139	3.81893
C1	Late-up	Zic	Zf	Cerebellum-ZIC1.2-ChIP-Seq	GSE60731	Homer	CCTGCTGAGH	0.1	0.1123	131	0.2657	11148.7	0.2274	7.26844
C1	Late-up	OCT:OCT-short	POU,Homeobox	NPC-OCT6-ChIP-Seq	GSE43916	Homer	ATGCATWATGCATRW	0.1	0.1144	57	0.1156	4367.7	0.0891	-3.93033
C1	Late-up	NeuroG2	bHLH	Fibroblast-NeuroG2-ChIP-Seq	GSE75910	Homer	ACCATCTGTT	0.1	0.1149	197	0.3996	17491.2	0.3567	5.7876
C1	Late-up	Pdx1	Homeobox	Islet-Pdx1-ChIP-Seq	SRA008281	Homer	YCATYAATCA	0.1	0.1154	88	0.1785	7172.3	0.1463	5.93226
C1	Late-up	Mef2a	MADS	HL1-Mef2a.biotin-ChIP-Seq	GSE21529	Homer	CYAAAAATAG	0.1	0.1193	39	0.0791	2815.8	0.0574	7.66895
C1	Late-up	Bach1	bZIP	K562-Bach1-ChIP-Seq	GSE31477	Homer	AWWNTGCTGAGTCAT	0.1	0.1216	9	0.0183	423.6	0.0086	9.34972
C1	Late-up	Esrrb	NR	mES-Esrrb-ChIP-Seq	GSE11431	Homer	KTGACCTTGA	0.1	0.1216	87	0.1765	7107.6	0.145	7.14928
C1	Late-up	PPARa	NR,DR1	Liver-Ppara-ChIP-Seq	GSE47954	Homer	VNAGGKCAAAGGTCA	0.1	0.1216	142	0.288	12252.5	0.2499	7.01326
C1	Late-up	OCT4-SOX2-TCF-NANOG	POU,Homeobox,HMG	mES-Oct4-ChIP-Seq	GSE11431	Homer	ATTTGCATAACAATG	0.1	0.1216	20	0.0406	1250.5	0.0255	8.75142
C1	Late-up	p73	p53	Trachea-p73-ChIP-Seq	PRJNA310161	Homer	NRRRCAWGTCCDGRCATGYY	0.1	0.1216	10	0.0203	495.4	0.0101	9.65302
C1	Late-up	EAR2	NR	K562-NR2F6-ChIP-Seq	Encode	Homer	NRBCARRGGTCA	0.1	0.1216	168	0.3408	14743.7	0.3007	6.65536
C1	Late-up	EWS:ERG-fusion	ETS	CADO_ES1-EWS:ERG-ChIP-Seq	SRA014231	Homer	ATTTCCTGTN	0.1	0.1232	85	0.1724	6946.2	0.1417	7.33879
C1	Late-up	RORa	NR	Liver-Rora-ChIP-Seq	GSE101115	Homer	AAWCTAGGTCARDNN	0.1	0.1288	20	0.0406	1264.1	0.0258	9.12099
C1	Late-up	Atf1	bZIP	K562-ATF1-ChIP-Seq	GSE31477	Homer	GATGACGTCA	0.1	0.1289	74	0.1501	5962	0.1216	6.25078
C1	Late-up	RBPJ:Ebox	?,bHLH	Panc1-Rbpj1-ChIP-Seq	GSE47459	Homer	GGGRAARRGRMCAGMTG	0.1	0.13	54	0.1095	4169.3	0.085	8.85279
C1	Late-up	COUP-TFII	NR	Artia-Nr2f2-ChIP-Seq	GSE46497	Homer	AGRGGTCA	0.1	0.1336	207	0.4199	18595.6	0.3793	5.83688
C1	Late-up	Rbpj1	?	Panc1-Rbpj1-ChIP-Seq	GSE47459	Homer	HTTTCCCASG	0.1	0.1383	179	0.3631	15895.1	0.3242	6.78071
C1	Late-up	Klf9	Zf	GBM-Klf9-ChIP-Seq	GSE62211	Homer	GCCACRCCCACY	0.1	0.1394	94	0.1907	7837.5	0.1598	7.93508
C1	Late-up	E2F3	E2F	MEF-E2F3-ChIP-Seq	GSE71376	Homer	BTKGGCGGGAAA	0.1	0.1417	107	0.217	9057.3	0.1847	6.82745
C1	Late-up	ERG	ETS	VCaP-ERG-ChIP-Seq	GSE14097	Homer	ACAGGAAGTG	0.1	0.1451	196	0.3976	17579.9	0.3585	6.43341
C1	Late-up	Lhx3	Homeobox	Neuron-Lhx3-ChIP-Seq	GSE31456	Homer	ADBTAATTAR	0.1	0.1454	139	0.2819	12095.9	0.2467	5.12751
C1	Late-up	BORIS	Zf	K562-CTCFL-ChIP-Seq	GSE32465	Homer	CNNBRGCGCCCCCTGSTGGC	0.1	0.1454	48	0.0974	3682.8	0.0751	9.03288
C1	Late-up	Gfi1b	Zf	HPC7-Gfi1b-ChIP-Seq	GSE22178	Homer	MAATCACTGC	0.1	0.1467	78	0.1582	6394	0.1304	6.76835
C1	Late-up	NFAT:AP1	RHD,bZIP	Jurkat-NFATC1-ChIP-Seq	Jolma_et_al.	Homer	SARTGGAAAAWRTGAGTCAB	0.1	0.1467	21	0.0426	1378.6	0.0281	8.95086
C1	Late-up	Usf2	bHLH	C2C12-Usf2-ChIP-Seq	GSE36030	Homer	GTCACGTGGT	0.1	0.148	43	0.0872	3253	0.0663	7.54255
C1	Late-up	Zic3	Zf	mES-Zic3-ChIP-Seq	GSE37889	Homer	GGCCYCCTGCTGDGH	0.1	0.148	108	0.2191	9188	0.1874	7.88465
C1	Late-up	ERRg	NR	Kidney-ESRRG-ChIP-Seq	GSE104905	Homer	GTGACCTTGRVN	0.1	0.1492	109	0.2211	9290.8	0.1895	7.03644
C1	Late-up	STAT6	Stat	CD4-Stat6-ChIP-Seq	GSE22104	Homer	ABTTCYYRRGAA	0.1	0.1506	55	0.1116	4328.6	0.0883	7.32879
C1	Late-up	PAX5	Paired,Homeobox,condensed	GM12878-PAX5-ChIP-Seq	GSE32465	Homer	GTCACGCTCSCTGM	0.1	0.1521	19	0.0385	1228.3	0.0251	8.4801
C1	Late-up	Hoxa9	Homeobox	ChickenMSG-Hoxa9.Flag-ChIP-Seq	GSE86088	Homer	RGCAATNAAA	0.1	0.1533	237	0.4807	21666.8	0.4419	5.52419
C1	Late-up	Ascl1	bHLH	NeuralTubes-Ascl1-ChIP-Seq	GSE55840	Homer	NNVVCAGCTGBN	0.1	0.158	219	0.4442	19914.2	0.4062	6.24294
C1	Late-up	ZNF467	Zf	HEK293-ZNF467.GFP-ChIP-Seq	GSE58341	Homer	TGGGGAAGGGCM	0.1	0.1608	152	0.3083	13422.7	0.2738	7.76178
C1	Late-up	Egr2	Zf	Thymocytes-Egr2-ChIP-Seq	GSE34254	Homer	NGCGTGGGCGGR	0.1	0.1608	43	0.0872	3289	0.0671	9.1687
C1	Late-up	Klf4	Zf	mES-Klf4-ChIP-Seq	GSE11431	Homer	GCCACACCCA	0.1	0.1608	76	0.1542	6268.7	0.1279	7.33396
C1	Late-up	Pax7	Paired,Homeobox	Myoblast-Pax7-ChIP-Seq	GSE25064	Homer	TAATCAATTA	0.1	0.1641	10	0.0203	543.1	0.0111	8.51472
C1	Late-up	ZBTB18	Zf	HEK293-ZBTB18.GFP-ChIP-Seq	GSE58341	Homer	AACATCTGGA	0.1	0.1641	74	0.1501	6099.7	0.1244	7.77411
C1	Late-up	NeuroD1	bHLH	Islet-NeuroD1-ChIP-Seq	GSE30298	Homer	GCCATCTGTT	0.1	0.1715	117	0.2373	10133.9	0.2067	7.08142
C1	Late-up	Erra	NR	HepG2-Erra-ChIP-Seq	GSE31477	Homer	CAAAGGTCAG	0.1	0.1722	269	0.5456	24934.9	0.5086	5.74942
C1	Late-up	Dlx3	Homeobox	Kerainocytes-Dlx3-ChIP-Seq	GSE89884	Homer	NDGTAATTAC	0.1	0.175	53	0.1075	4216.3	0.086	5.57497
C1	Late-up	FOXA1	Forkhead	LNCAP-FOXA1-ChIP-Seq	GSE27824	Homer	WAAGTAAACA	0.1	0.175	113	0.2292	9770.8	0.1993	6.33753
C1	Late-up	Hoxd12	Homeobox	ChickenMSG-Hoxd12.Flag-ChIP-Seq	GSE86088	Homer	HDGYAATGAAAN	0.1	0.1752	152	0.3083	13494.9	0.2752	6.23557
C1	Late-up	TR4	NR,DR1	Hela-TR4-ChIP-Seq	GSE24685	Homer	GAGGTCAAAGGTCA	0.1	0.1842	20	0.0406	1356.7	0.0277	9.35237
C1	Late-up	EWS:FLI1-fusion	ETS	SK_N_MC-EWS:FLI1-ChIP-Seq	SRA014231	Homer	VACAGGAAAT	0.1	0.1842	79	0.1602	6619.4	0.135	4.87542
C1	Late-up	Pknox1	Homeobox	ES-Prep1-ChIP-Seq	GSE63282	Homer	SCTGTCAVTCAV	0.1	0.1854	37	0.0751	2817.4	0.0575	8.29962
C1	Late-up	Hoxa11	Homeobox	ChickenMSG-Hoxa11.Flag-ChIP-Seq	GSE86088	Homer	TTTTATGGCM	0.1	0.1854	193	0.3915	17507.8	0.3571	5.40132
C1	Late-up	Foxh1	Forkhead	hESC-FOXH1-ChIP-Seq	GSE29422	Homer	NNTGTGGATTSS	0.1	0.1859	61	0.1237	4975.5	0.1015	7.15123
C1	Late-up	DMRT1	DM	Testis-DMRT1-ChIP-Seq	GSE64892	Homer	TWGHWACAWTGTWDC	0.1	0.1871	26	0.0527	1870.4	0.0381	7.68035
C1	Late-up	LEF1	HMG	H1-LEF1-ChIP-Seq	GSE64758	Homer	CCTTTGATST	0.1	0.1886	73	0.1481	6087	0.1241	7.55657
C1	Late-up	ZNF264	Zf	HEK293-ZNF264.GFP-ChIP-Seq	GSE58341	Homer	RGGGCACTAACY	0.1	0.1886	90	0.1826	7667.1	0.1564	6.82124
C1	Late-up	KLF6	Zf	PDAC-KLF6-ChIP-Seq	GSE64557	Homer	MKGGGYGTGGCC	0.1	0.1886	184	0.3732	16654.7	0.3397	5.44761
C1	Late-up	Tgif1	Homeobox	mES-Tgif1-ChIP-Seq	GSE55404	Homer	YTGWCADY	0.1	0.1886	290	0.5882	27129.3	0.5533	4.97491
C1	Late-up	c-Jun-CRE	bZIP	K562-cJun-ChIP-Seq	GSE31477	Homer	ATGACGTCATCY	0.1	0.1886	36	0.073	2746.6	0.056	7.33792
C1	Late-up	ZNF189	Zf	HEK293-ZNF189.GFP-ChIP-Seq	GSE58341	Homer	TGGAACAGMA	0.1	0.1886	114	0.2312	9936.7	0.2027	7.11928
C1	Late-up	SPDEF	ETS	VCaP-SPDEF-ChIP-Seq	SRA014231	Homer	ASWTCCTGBT	0.1	0.1889	134	0.2718	11847.4	0.2416	6.87195
C1	Late-up	Srebp2	bHLH	HepG2-Srebp2-ChIP-Seq	GSE31477	Homer	CGGTCACSCCAC	0.1	0.1889	22	0.0446	1543.1	0.0315	8.76533
C1	Late-up	Zfp281	Zf	ES-Zfp281-ChIP-Seq	GSE81042	Homer	CCCCTCCCCCAC	0.1	0.1894	61	0.1237	5003.3	0.102	9.77408
C1	Late-up	Atf2	bZIP	3T3L1-Atf2-ChIP-Seq	GSE56872	Homer	NRRTGACGTCAT	0.1	0.191	40	0.0811	3112.4	0.0635	7.09852
C1	Late-up	Jun-AP1	bZIP	K562-cJun-ChIP-Seq	GSE31477	Homer	GATGASTCATCN	0.1	0.1926	28	0.0568	2063.2	0.0421	8.48626
C1	Late-up	Hoxd10	Homeobox	ChickenMSG-Hoxd10.Flag-ChIP-Seq	GSE86088	Homer	GGCMATGAAA	0.1	0.1938	106	0.215	9211.2	0.1879	6.61875
C1	Late-up	Egr1	Zf	K562-Egr1-ChIP-Seq	GSE32465	Homer	TGCGTGGGYG	0.1	0.1943	127	0.2576	11210.5	0.2286	7.3533
C1	Late-up	Nkx6.1	Homeobox	Islet-Nkx6.1-ChIP-Seq	GSE40975	Homer	GKTAATGR	0.1	0.2024	200	0.4057	18296.1	0.3732	4.63307
C1	Late-up	Srebp1a	bHLH	HepG2-Srebp1a-ChIP-Seq	GSE31477	Homer	RTCACSCCAY	0.1	0.2065	29	0.0588	2172	0.0443	7.91168
C1	Late-up	ERE	NR,IR3	MCF7-ERa-ChIP-Seq	Unpublished	Homer	VAGGTCACNSTGACC	0.1	0.2073	41	0.0832	3234.5	0.066	7.66658
C1	Late-up	HIC1	Zf	Treg-ZBTB29-ChIP-Seq	GSE99889	Homer	TGCCAGCB	0.1	0.2073	271	0.5497	25335.8	0.5167	5.97511
C1	Late-up	MafK	bZIP	C2C12-MafK-ChIP-Seq	GSE36030	Homer	GCTGASTCAGCA	0.1	0.2211	36	0.073	2809.8	0.0573	8.22154
C1	Late-up	BHLHA15	bHLH	NIH3T3-BHLHB8.HA-ChIP-Seq	GSE119782	Homer	NAMCAGCTGK	0.1	0.2222	182	0.3692	16608.8	0.3387	6.8237
C1	Late-up	Zfp809	Zf	ES-Zfp809-ChIP-Seq	GSE70799	Homer	GGGGCTYGKCTGGGA	0.1	0.2225	42	0.0852	3351.8	0.0684	9.01233
C1	Late-up	E2F6	E2F	Hela-E2F6-ChIP-Seq	GSE31477	Homer	GGCGGGAARN	0.1	0.2325	91	0.1846	7900.8	0.1611	7.14891
C1	Late-up	Phox2b	Homeobox	CLBGA-PHOX2B-ChIP-Seq	GSE90683	Homer	TTAATTNAATTA	0.1	0.2325	15	0.0304	1010.1	0.0206	4.10044
C1	Late-up	Hoxa13	Homeobox	ChickenMSG-Hoxa13.Flag-ChIP-Seq	GSE86088	Homer	CYHATAAAAN	0.1	0.2407	198	0.4016	18233.1	0.3719	5.79616
C1	Late-up	PBX1	Homeobox	MCF7-PBX1-ChIP-Seq	GSE28007	Homer	GSCTGTCACTCA	0.1	0.2451	15	0.0304	1022.4	0.0209	8.65539
C1	Late-up	PU.1:IRF8	ETS:IRF	pDC-Irf8-ChIP-Seq	GSE66899	Homer	GGAAGTGAAAST	0.1	0.2472	23	0.0467	1706	0.0348	8.98699
C1	Late-up	STAT6	Stat	Macrophage-Stat6-ChIP-Seq	GSE38377	Homer	TTCCKNAGAA	1	0.2556	55	0.1116	4595	0.0937	6.48048
C1	Late-up	Pbx3	Homeobox	GM12878-PBX3-ChIP-Seq	GSE32465	Homer	SCTGTCAMTCAN	1	0.2556	36	0.073	2865.3	0.0584	8.24848
C1	Late-up	RORgt	NR	EL4-RORgt.Flag-ChIP-Seq	GSE56019	Homer	AAYTAGGTCA	1	0.2559	16	0.0325	1118	0.0228	8.64571
C1	Late-up	RORgt	NR	EL4-RORgt.Flag-ChIP-Seq	GSE56019	Homer	AAYTAGGTCA	1	0.2559	16	0.0325	1118	0.0228	8.64571
C1	Late-up	RORgt	NR	EL4-RORgt.Flag-ChIP-Seq	GSE56019	Homer	AAYTAGGTCA	1	0.2559	16	0.0325	1118	0.0228	8.64571
C1	Late-up	RORgt	NR	EL4-RORgt.Flag-ChIP-Seq	GSE56019	Homer	AAYTAGGTCA	1	0.2559	16	0.0325	1118	0.0228	8.64571
C1	Late-up	EBF1	EBF	Near-E2A-ChIP-Seq	GSE21512	Homer	GTCCCCWGGGGA	1	0.265	160	0.3245	14609.8	0.298	6.75203
C1	Late-up	PU.1	ETS	ThioMac-PU.1-ChIP-Seq	GSE21512	Homer	AGAGGAAGTG	1	0.2865	64	0.1298	5483.3	0.1118	7.61317
C1	Late-up	Atf4	bZIP	MEF-Atf4-ChIP-Seq	GSE35681	Homer	MTGATGCAAT	1	0.2973	24	0.0487	1844.7	0.0376	6.54
C1	Late-up	Unknown-ESC-element	?	mES-Nanog-ChIP-Seq	GSE11724	Homer	CACAGCAGGGGG	1	0.2973	90	0.1826	7951.1	0.1622	7.69767
C1	Late-up	TCF4	bHLH	SHSY5Y-TCF4-ChIP-Seq	GSE96915	Homer	SMCATCTGKH	1	0.2973	191	0.3874	17714.3	0.3613	7.0005
C1	Late-up	HNF4a	NR,DR1	HepG2-HNF4a-ChIP-Seq	GSE25021	Homer	CARRGKBCAAAGTYCA	1	0.2973	63	0.1278	5410.7	0.1104	7.85757
C1	Late-up	ETV4	ETS	HepG2-ETV4-ChIP-Seq	ENCODE	Homer	ACCGGAAGTG	1	0.2973	154	0.3124	14112	0.2878	6.20352
C1	Late-up	THRb	NR	HepG2-THRb.Flag-ChIP-Seq	Encode	Homer	GGTCACCTGAGGTCA	1	0.2973	86	0.1744	7584.9	0.1547	7.16567
C1	Late-up	TEAD2	TEA	Py2T-Tead2-ChIP-Seq	GSE55709	Homer	CCWGGAATGY	1	0.2987	59	0.1197	5051.8	0.103	7.34798
C1	Late-up	MYB	HTH	ERMYB-Myb-ChIPSeq	GSE22095	Homer	GGCVGTTR	1	0.3052	186	0.3773	17265.1	0.3521	2.20058
C1	Late-up	CTCF-SatelliteElement	Zf?	CD4+-CTCF-ChIP-Seq	Barski_et_al.	Homer	TGCAGTTCCMVNWRTGGCCA	1	0.3056	4	0.0081	193.6	0.0039	11.1597
C1	Late-up	ZNF322	Zf	HEK293-ZNF322.GFP-ChIP-Seq	GSE58341	Homer	GAGCCTGGTACTGWGCCTGR	1	0.3135	51	0.1034	4332.5	0.0884	8.91909
C1	Late-up	RXR	NR,DR1	3T3L1-RXR-ChIP-Seq	GSE13511	Homer	TAGGGCAAAGGTCA	1	0.3135	150	0.3043	13778.1	0.281	6.64118
C1	Late-up	Six4	Homeobox	MCF7-SIX4-ChIP-Seq	Encode	Homer	TGWAAYCTGABACCB	1	0.3168	7	0.0142	424.1	0.0086	9.91365
C1	Late-up	Hoxb4	Homeobox	ES-Hoxb4-ChIP-Seq	GSE34014	Homer	TGATTRATGGCY	1	0.3168	21	0.0426	1611.3	0.0329	7.99284
C1	Late-up	RARa	NR	K562-RARa-ChIP-Seq	Encode	Homer	TTGAMCTTTG	1	0.3191	288	0.5842	27416.1	0.5592	5.64635
C1	Late-up	KLF10	Zf	HEK293-KLF10.GFP-ChIP-Seq	GSE58341	Homer	GGGGGTGTGTCC	1	0.3191	114	0.2312	10322.7	0.2105	6.71966
C1	Late-up	GFY	?	Promoter	NA	Homer	ACTACAATTCCC	1	0.3201	10	0.0203	671.2	0.0137	9.37784
C1	Late-up	Lhx1	Homeobox	EmbryoCarcinoma-Lhx1-ChIP-Seq	GSE70957	Homer	NNYTAATTAR	1	0.3201	89	0.1805	7936.1	0.1619	5.97818
C1	Late-up	ZNF711	Zf	SHSY5Y-ZNF711-ChIP-Seq	GSE20673	Homer	AGGCCTAG	1	0.3201	246	0.499	23244.1	0.4741	6.10193
C1	Late-up	CEBP:AP1	bZIP	ThioMac-CEBPb-ChIP-Seq	GSE21512	Homer	DRTGTTGCAA	1	0.325	66	0.1339	5769.6	0.1177	6.42862
C1	Late-up	HOXA1	Homeobox	mES-Hoxa1-ChIP-Seq	SRP084292	Homer	TGATKGATGR	1	0.325	26	0.0527	2071.9	0.0423	8.01907
C1	Late-up	Pit1+1bp	Homeobox	GCrat-Pit1-ChIP-Seq	GSE58009	Homer	ATGCATAATTCA	1	0.325	25	0.0507	1983.7	0.0405	7.33824
C1	Late-up	Cdx2	Homeobox	mES-Cdx2-ChIP-Seq	GSE14586	Homer	GYMATAAAAH	1	0.325	57	0.1156	4930.9	0.1006	6.98658
C1	Late-up	ZNF416	Zf	HEK293-ZNF416.GFP-ChIP-Seq	GSE58341	Homer	WDNCTGGGCA	1	0.325	187	0.3793	17452.2	0.3559	7.03014
C1	Late-up	THRa	NR	C17.2-THRa-ChIP-Seq	GSE38347	Homer	GGTCANYTGAGGWCA	1	0.3313	59	0.1197	5130.6	0.1046	7.77288
C1	Late-up	Cux2	Homeobox	Liver-Cux2-ChIP-Seq	GSE35985	Homer	HNRAATCAAT	1	0.3328	35	0.071	2904.5	0.0592	6.35909
C1	Late-up	Stat3+il21	Stat	CD4-Stat3-ChIP-Seq	GSE19198	Homer	SVYTTCCNGGAARB	1	0.3328	83	0.1684	7406.6	0.1511	6.74705
C1	Late-up	CEBP:CEBP	bZIP	MEF-Chop-ChIP-Seq	GSE35681	Homer	NTNATGCAAYMNNHTGMAAY	1	0.3402	13	0.0264	944.4	0.0193	9.05353
C1	Late-up	Fosl2	bZIP	3T3L1-Fosl2-ChIP-Seq	GSE56872	Homer	NATGASTCABNN	1	0.3402	35	0.071	2915.9	0.0595	7.02941
C1	Late-up	FXR	NR,IR1	Liver-FXR-ChIP-Seq	Chong_et_al.	Homer	AGGTCANTGACCTB	1	0.3402	54	0.1095	4682.3	0.0955	6.87316
C1	Late-up	E2F4	E2F	K562-E2F4-ChIP-Seq	GSE31477	Homer	GGCGGGAAAH	1	0.3402	70	0.142	6190	0.1262	6.58096
C1	Late-up	DUX	Homeobox	C2C12-Dux-ChIP-Seq	GSE87279	Homer	BCWGATTCAATCAAN	1	0.342	1	0.002	18.6	0.0004	12.6144
C1	Late-up	THRb	NR	Liver-NR1A2-ChIP-Seq	GSE52613	Homer	TRAGGTCA	1	0.3427	374	0.7586	36207.1	0.7385	5.1173
C1	Late-up	Pax8	Paired,Homeobox	Thyroid-Pax8-ChIP-Seq	GSE26938	Homer	GTCATGCHTGRCTGS	1	0.3468	52	0.1055	4513.4	0.0921	8.21097
C1	Late-up	ZSCAN22	Zf	HEK293-ZSCAN22.GFP-ChIP-Seq	GSE58341	Homer	SMCAGTCWGAKGGAGGAGGC	1	0.3468	15	0.0304	1128.6	0.023	10.1568
C1	Late-up	CUX1	Homeobox	K562-CUX1-ChIP-Seq	GSE92882	Homer	TATCGATNAN	1	0.3468	53	0.1075	4610.9	0.094	6.16664
C1	Late-up	EBF	EBF	proBcell-EBF-ChIP-Seq	GSE21978	Homer	DGTCCCYRGGGA	1	0.3489	34	0.069	2847.4	0.0581	8.59001
C1	Late-up	ETS1	ETS	Jurkat-ETS1-ChIP-Seq	GSE17954	Homer	ACAGGAAGTG	1	0.3489	130	0.2637	11987.4	0.2445	6.52537
C1	Late-up	PRDM1	Zf	Hela-PRDM1-ChIP-Seq	GSE31477	Homer	ACTTTCACTTTC	1	0.3489	59	0.1197	5182.7	0.1057	7.91277
C1	Late-up	Elf4	ETS	BMDM-Elf4-ChIP-Seq	GSE88699	Homer	ACTTCCKGKT	1	0.3489	129	0.2617	11894.5	0.2426	6.93529
C1	Late-up	Zfp57	Zf	H1-ZFP57.HA-ChIP-Seq	GSE115387	Homer	NANTGCSGCA	1	0.3527	61	0.1237	5382.3	0.1098	6.37386
C1	Late-up	ZFX	Zf	mES-Zfx-ChIP-Seq	GSE11431	Homer	AGGCCTRG	1	0.3527	181	0.3671	16983.1	0.3464	6.24845
C1	Late-up	Olig2	bHLH	Neuron-Olig2-ChIP-Seq	GSE30882	Homer	RCCATMTGTT	1	0.354	217	0.4402	20536.5	0.4188	6.05339
C1	Late-up	GATA:SCL	Zf,bHLH	Ter119-SCL-ChIP-Seq	GSE18720	Homer	CRGCTGBNGNSNNSAGATAA	1	0.3553	15	0.0304	1143.1	0.0233	8.5623
C1	Late-up	HOXA2	Homeobox	mES-Hoxa2-ChIP-Seq	Donaldson_et_al.	Homer	GYCATCMATCAT	1	0.3573	12	0.0243	883.5	0.018	9.38885
C1	Late-up	MafF	bZIP	HepG2-MafF-ChIP-Seq	GSE31477	Homer	HWWGTCAGCAWWTTT	1	0.3574	23	0.0467	1862.5	0.038	8.35902
C1	Late-up	CArG	MADS	PUER-Srf-ChIP-Seq	Sullivan_et_al.	Homer	CCATATATGGNM	1	0.3616	31	0.0629	2598.4	0.053	6.91146
C1	Late-up	WT1	Zf	Kidney-WT1-ChIP-Seq	GSE90016	Homer	MCTCCCMCRCAB	1	0.3616	107	0.217	9811.4	0.2001	7.71093
C1	Late-up	ELF3	ETS	PDAC-ELF3-ChIP-Seq	GSE64557	Homer	ANCAGGAAGT	1	0.3772	85	0.1724	7722.8	0.1575	7.58608
C1	Late-up	PBX2	Homeobox	K562-PBX2-ChIP-Seq	Encode	Homer	RTGATTKATRGN	1	0.3772	70	0.142	6289.8	0.1283	6.66559
C1	Late-up	Hnf6b	Homeobox	LNCaP-Hnf6b-ChIP-Seq	GSE106305	Homer	TATTGAYY	1	0.3882	67	0.1359	6020.4	0.1228	6.25467
C1	Late-up	Rfx1	HTH	NPC-H3K4me1-ChIP-Seq	GSE16256	Homer	KGTTGCCATGGCAA	1	0.407	29	0.0588	2461	0.0502	8.05843
C1	Late-up	Fli1	ETS	CD8-FLI-ChIP-Seq	GSE20898	Homer	NRYTTCCGGH	1	0.4078	142	0.288	13307.5	0.2714	5.89729
C1	Late-up	Hoxd13	Homeobox	ChickenMSG-Hoxd13.Flag-ChIP-Seq	GSE86088	Homer	NCYAATAAAA	1	0.4105	127	0.2576	11852.5	0.2417	6.01605
C1	Late-up	X-box	HTH	NPC-H3K4me1-ChIP-Seq	GSE16256	Homer	GGTTGCCATGGCAA	1	0.4105	15	0.0304	1187.8	0.0242	9.02111
C1	Late-up	Hoxc9	Homeobox	Ainv15-Hoxc9-ChIP-Seq	GSE21812	Homer	GGCCATAAATCA	1	0.4105	40	0.0811	3496.5	0.0713	6.35975
C1	Late-up	NFE2L2	bZIP	HepG2-NFE2L2-ChIP-Seq	Encode	Homer	AWWWTGCTGAGTCAT	1	0.4195	7	0.0142	491.9	0.01	9.88653
C1	Late-up	OCT:OCT	POU,Homeobox	NPC-OCT6-ChIP-Seq	GSE43916	Homer	YATGCATATRCATRT	1	0.4267	12	0.0243	932.1	0.019	9.58608
C1	Late-up	HNF6	Homeobox	Liver-Hnf6-ChIP-Seq	ERP000394	Homer	NTATYGATCH	1	0.4297	42	0.0852	3713.7	0.0757	4.57375
C1	Late-up	ZNF136	Zf	HEK293-ZNF136.GFP-ChIP-Seq	GSE58341	Homer	YTKGATAHAGTATTCTWGGTNGGCA	1	0.4317	9	0.0183	671.9	0.0137	9.0964
C1	Late-up	DMRT6	DM	Testis-DMRT6-ChIP-Seq	GSE60440	Homer	YDGHTACAWTGTADC	1	0.4317	20	0.0406	1663.4	0.0339	7.81831
C1	Late-up	SpiB	ETS	OCILY3-SPIB-ChIP-Seq	GSE56857	Homer	AAAGRGGAAGTG	1	0.4391	27	0.0548	2318	0.0473	8.85312
C1	Late-up	TEAD4	TEA	Tropoblast-Tead4-ChIP-Seq	GSE37350	Homer	CCWGGAATGY	1	0.444	91	0.1846	8437.2	0.1721	7.17274
C1	Late-up	HIF2a	bHLH	785_O-HIF2a-ChIP-Seq	GSE34871	Homer	GCACGTACCC	1	0.4467	40	0.0811	3550.6	0.0724	6.74272
C1	Late-up	Nanog	Homeobox	mES-Nanog-ChIP-Seq	GSE11724	Homer	RGCCATTAAC	1	0.4494	340	0.6897	33071.9	0.6745	4.45706
C1	Late-up	Tbx20	T-box	Heart-Tbx20-ChIP-Seq	GSE29636	Homer	GGTGYTGACAGS	1	0.4514	29	0.0588	2521.1	0.0514	8.53871
C1	Late-up	SF1	NR	H295R-Nr5a1-ChIP-Seq	GSE44220	Homer	CAAGGHCANV	1	0.4558	67	0.1359	6146.4	0.1254	6.51408
C1	Late-up	GABPA	ETS	Jurkat-GABPa-ChIP-Seq	GSE17954	Homer	RACCGGAAGT	1	0.4644	115	0.2333	10815.5	0.2206	6.58177
C1	Late-up	Rfx5	HTH	GM12878-Rfx5-ChIP-Seq	GSE31477	Homer	SCCTAGCAACAG	1	0.467	45	0.0913	4055.1	0.0827	8.12207
C1	Late-up	Isl1	Homeobox	Neuron-Isl1-ChIP-Seq	GSE31456	Homer	CTAATKGV	1	0.4733	166	0.3367	15834.9	0.323	5.47186
C1	Late-up	ZNF519	Zf	HEK293-ZNF519.GFP-ChIP-Seq	GSE58341	Homer	GAGSCCGAGC	1	0.488	42	0.0852	3794.8	0.0774	7.96525
C1	Late-up	HOXB13	Homeobox	ProstateTumor-HOXB13-ChIP-Seq	GSE56288	Homer	TTTTATKRGG	1	0.5115	87	0.1765	8168.7	0.1666	4.26957
C1	Late-up	Six2	Homeobox	NephronProgenitor-Six2-ChIP-Seq	GSE39837	Homer	GWAAYHTGAKMC	1	0.5115	92	0.1866	8656.3	0.1765	6.53718
C1	Late-up	E-box	bHLH	Promoter	NA	Homer	SSGGTCACGTGA	1	0.5115	11	0.0223	898.2	0.0183	8.81622
C1	Late-up	MafB	bZIP	BMM-Mafb-ChIP-Seq	GSE75722	Homer	WNTGCTGASTCAGCANWTTY	1	0.517	50	0.1014	4599.5	0.0938	6.39362
C1	Late-up	ZNF675	Zf	HEK293-ZNF675.GFP-ChIP-Seq	GSE58341	Homer	ARGAGGMCAAAATGW	1	0.5202	15	0.0304	1275.9	0.026	8.91287
C1	Late-up	E2F7	E2F	Hela-E2F7-ChIP-Seq	GSE32673	Homer	VDTTTCCCGCCA	1	0.5247	19	0.0385	1653.6	0.0337	8.69074
C1	Late-up	RFX	HTH	K562-RFX3-ChIP-Seq	SRA012198	Homer	CGGTTGCCATGGCAAC	1	0.5258	12	0.0243	1002.5	0.0204	8.57081
C1	Late-up	MafA	bZIP	Islet-MafA-ChIP-Seq	GSE30298	Homer	TGCTGACTCA	1	0.5271	99	0.2008	9380.8	0.1913	6.97933
C1	Late-up	RUNX-AML	Runt	CD4+-PolII-ChIP-Seq	Barski_et_al.	Homer	GCTGTGGTTW	1	0.5271	81	0.1643	7626.9	0.1556	7.38572
C1	Late-up	Pitx1	Homeobox	Chicken-Pitx1-ChIP-Seq	GSE38910	Homer	TAATCCCN	1	0.5302	329	0.6673	32167.3	0.6561	4.69519
C1	Late-up	GATA	Zf,IR3	iTreg-Gata3-ChIP-Seq	GSE20898	Homer	NNNNNBAGATAWYATCTVHN	1	0.5333	12	0.0243	1010.3	0.0206	8.21231
C1	Late-up	MYNN	Zf	HEK293-MYNN.eGFP-ChIP-Seq	Encode	Homer	TTCAAAWTAAAAGTC	1	0.5333	21	0.0426	1855.1	0.0378	8.24115
C1	Late-up	Rfx2	HTH	LoVo-RFX2-ChIP-Seq	GSE49402	Homer	GTTGCCATGGCAACM	1	0.5333	13	0.0264	1105.2	0.0225	8.14702
C1	Late-up	GLIS3	Zf	Thyroid-Glis3.GFP-ChIP-Seq	GSE103297	Homer	CTCCCTGGGAGGCCN	1	0.5333	209	0.4239	20238.5	0.4128	6.23448
C1	Late-up	ETV1	ETS	GIST48-ETV1-ChIP-Seq	GSE22441	Homer	AACCGGAAGT	1	0.5348	168	0.3408	16194.4	0.3303	6.28588
C1	Late-up	EHF	ETS	LoVo-EHF-ChIP-Seq	GSE49402	Homer	AVCAGGAAGT	1	0.5349	144	0.2921	13832.3	0.2821	7.21279
C1	Late-up	ZNF652	NA	HepG2-ZNF652.Flag-ChIP-Seq	Encode	Homer	TTAACCCTTTVNKKN	1	0.544	21	0.0426	1870.2	0.0381	7.87742
C1	Late-up	Chop	bZIP	MEF-Chop-ChIP-Seq	GSE35681	Homer	ATTGCATCAT	1	0.5668	16	0.0325	1412.4	0.0288	7.62649
C1	Late-up	PU.1-IRF	ETS:IRF	Bcell-PU.1-ChIP-Seq	GSE21512	Homer	MGGAAGTGAAAC	1	0.6133	138	0.2799	13379.3	0.2729	6.85196
C1	Late-up	CLOCK	bHLH	Liver-Clock-ChIP-Seq	GSE39860	Homer	GHCACGTG	1	0.6164	61	0.1237	5815.2	0.1186	6.34007
C1	Late-up	ZNF692	Zf	HEK293-ZNF692.GFP-ChIP-Seq	GSE58341	Homer	GTGGGCCCCA	1	0.6164	22	0.0446	2022.5	0.0412	8.1892
C1	Late-up	bHLHE41	bHLH	proB-Bhlhe41-ChIP-Seq	GSE93764	Homer	KCACGTGMCN	1	0.6164	135	0.2738	13097.9	0.2671	5.31838
C1	Late-up	Zac1	Zf	Neuro2A-Plagl1-ChIP-Seq	GSE75942	Homer	HAWGRGGCCM	1	0.6193	310	0.6288	30474.4	0.6215	5.51033
C1	Late-up	CHR	?	Hela-CellCycle-Expression	NA	Homer	SRGTTTCAAA	1	0.6193	48	0.0974	4556.3	0.0929	7.76332
C1	Late-up	Prop1	Homeobox	GHFT1-PROP1.biotin-ChIP-Seq	GSE77302	Homer	NTAATBNAATTA	1	0.6218	37	0.0751	3489.3	0.0712	6.55312
C1	Late-up	NFAT	RHD	Jurkat-NFATC1-ChIP-Seq	Jolma_et_al.	Homer	ATTTTCCATT	1	0.6255	78	0.1582	7510.5	0.1532	6.82293
C1	Late-up	bHLHE40	bHLH	HepG2-BHLHE40-ChIP-Seq	GSE31477	Homer	KCACGTGMCN	1	0.6281	35	0.071	3304	0.0674	7.06883
C1	Late-up	Tbr1	T-box	Cortex-Tbr1-ChIP-Seq	GSE71384	Homer	AAGGTGTKAA	1	0.6281	121	0.2454	11755.1	0.2397	6.12153
C1	Late-up	c-Myc	bHLH	LNCAP-cMyc-ChIP-Seq	Unpublished	Homer	VCCACGTG	1	0.645	56	0.1136	5381.7	0.1098	6.6135
C1	Late-up	HIF-1a	bHLH	MCF7-HIF1a-ChIP-Seq	GSE28352	Homer	TACGTGCV	1	0.645	27	0.0548	2544.2	0.0519	7.05527
C1	Late-up	TEAD3	TEA	HepG2-TEAD3-ChIP-Seq	Encode	Homer	TRCATTCCAG	1	0.6544	108	0.2191	10523.9	0.2146	5.85698
C1	Late-up	JunD	bZIP	K562-JunD-ChIP-Seq	NA	Homer	ATGACGTCATCN	1	0.6554	10	0.0203	904.9	0.0185	8.84006
C1	Late-up	Elk4	ETS	Hela-Elk4-ChIP-Seq	GSE31477	Homer	NRYTTCCGGY	1	0.6556	76	0.1542	7373.6	0.1504	6.6569
C1	Late-up	Smad3	MAD	NPC-Smad3-ChIP-Seq	GSE36673	Homer	TWGTCTGV	1	0.6591	301	0.6105	29692.5	0.6056	6.11917
C1	Late-up	USF1	bHLH	GM12878-Usf1-ChIP-Seq	GSE32465	Homer	SGTCACGTGR	1	0.6621	51	0.1034	4924.3	0.1004	6.62948
C1	Late-up	STAT4	Stat	CD4-Stat4-ChIP-Seq	GSE22104	Homer	NYTTCCWGGAAR	1	0.6678	89	0.1805	8682	0.1771	5.22025
C1	Late-up	Pax7	Paired,Homeobox,longest	Myoblast-Pax7-ChIP-Seq	GSE25064	Homer	NTAATTDGCYAATTANNWWD	1	0.6907	2	0.0041	153.9	0.0031	10.9116
C1	Late-up	ZNF669	Zf	HEK293-ZNF669.GFP-ChIP-Seq	GSE58341	Homer	GARTGGTCATCGCCC	1	0.6937	9	0.0183	832.8	0.017	8.24108
C1	Late-up	Tcf3	HMG	mES-Tcf3-ChIP-Seq	GSE11724	Homer	ASWTCAAAGG	1	0.6961	25	0.0507	2406.2	0.0491	8.52904
C1	Late-up	CRE	bZIP	Promoter	NA	Homer	CSGTGACGTCAC	1	0.7005	26	0.0527	2510.3	0.0512	5.91825
C1	Late-up	ZNF143|STAF	Zf	CUTLL-ZNF143-ChIP-Seq	GSE29600	Homer	ATTTCCCAGVAKSCY	1	0.7155	52	0.1055	5098.2	0.104	8.6236
C1	Late-up	Tcfcp2l1	CP2	mES-Tcfcp2l1-ChIP-Seq	GSE11431	Homer	NRAACCRGTTYRAACCRGYT	1	0.7213	20	0.0406	1937.9	0.0395	8.04087
C1	Late-up	Tbx5	T-box	HL1-Tbx5.biotin-ChIP-Seq	GSE21529	Homer	AGGTGTCA	1	0.7213	307	0.6227	30436.8	0.6208	5.41231
C1	Late-up	NF1:FOXA1	CTF,Forkhead	LNCAP-FOXA1-ChIP-Seq	GSE27824	Homer	WNTGTTTRYTTTGGCA	1	0.7233	5	0.0101	458.8	0.0094	10.2737
C1	Late-up	AP-2gamma	AP2	MCF7-TFAP2C-ChIP-Seq	GSE21234	Homer	SCCTSAGGSCAW	1	0.7233	158	0.3205	15643.2	0.319	6.34979
C1	Late-up	E2A	bHLH	proBcell-E2A-ChIP-Seq	GSE21978	Homer	DNRCAGCTGY	1	0.728	192	0.3895	19035.1	0.3882	6.42721
C1	Late-up	Hand2	bHLH	Mesoderm-Hand2-ChIP-Seq	GSE61475	Homer	TGACANARRCCAGRC	1	0.7312	56	0.1136	5530.5	0.1128	8.40959
C1	Late-up	ELF5	ETS	T47D-ELF5-ChIP-Seq	GSE30407	Homer	ACVAGGAAGT	1	0.7493	81	0.1643	8043.9	0.1641	6.8543
C1	Late-up	ZNF768	Zf	Rajj-ZNF768-ChIP-Seq	GSE111879	Homer	RHHCAGAGAGGB	1	0.7493	5	0.0101	471.4	0.0096	9.65865
C1	Late-up	Tbx21	T-box	GM12878-TBX21-ChIP-Seq	Encode	Homer	AGGTGTGAAA	1	0.7504	89	0.1805	8848.4	0.1805	6.62472
C1	Late-up	ZNF165	Zf	WHIM12-ZNF165-ChIP-Seq	GSE65937	Homer	AAGGKGRCGCAGGCA	1	0.7652	21	0.0426	2086.9	0.0426	9.83527
C1	Late-up	ZNF382	Zf	HEK293-ZNF382.GFP-ChIP-Seq	GSE58341	Homer	GNCTGTASTRNTGBCTCHTT	1	0.7652	3	0.0061	278.8	0.0057	10.5743
C1	Late-up	PAX3:FKHR-fusion	Paired,Homeobox	Rh4-PAX3:FKHR-ChIP-Seq	GSE19063	Homer	ACCRTGACTAATTNN	1	0.7702	16	0.0325	1592.3	0.0325	7.41361
C1	Late-up	HRE	HSF	Striatum-HSF1-ChIP-Seq	GSE38000	Homer	TTCTAGAABNTTCTA	1	0.7702	21	0.0426	2095	0.0427	8.2342
C1	Late-up	IRF1	IRF	PBMC-IRF1-ChIP-Seq	GSE43036	Homer	GAAAGTGAAAGT	1	0.7718	11	0.0223	1093.3	0.0223	9.68899
C1	Late-up	EBF2	EBF	BrownAdipose-EBF2-ChIP-Seq	GSE97114	Homer	NABTCCCWDGGGAVH	1	0.7728	117	0.2373	11696.4	0.2385	6.63664
C1	Late-up	Phox2a	Homeobox	Neuron-Phox2a-ChIP-Seq	GSE31456	Homer	YTAATYNRATTA	1	0.7918	21	0.0426	2119.7	0.0432	7.17589
C1	Late-up	VDR	NR,DR3	GM10855-VDR+vitD-ChIP-Seq	GSE22484	Homer	ARAGGTCANWGAGTTCANNN	1	0.7918	24	0.0487	2422.3	0.0494	8.33047
C1	Late-up	E2F1	E2F	Hela-E2F1-ChIP-Seq	GSE22478	Homer	CWGGCGGGAA	1	0.7957	36	0.073	3638.8	0.0742	7.5313
C1	Late-up	OCT:OCT	POU,Homeobox,IR1	NPC-Brn2-ChIP-Seq	GSE35496	Homer	ATGAATWATTCATGA	1	0.8141	1	0.002	86.9	0.0018	10.7838
C1	Late-up	RUNX	Runt	HPC7-Runx1-ChIP-Seq	GSE22178	Homer	SAAACCACAG	1	0.8149	76	0.1542	7686	0.1568	6.62587
C1	Late-up	Tbox:Smad	T-box,MAD	ESCd5-Smad2_3-ChIP-Seq	GSE29422	Homer	AGGTGHCAGACA	1	0.8224	20	0.0406	2053.1	0.0419	8.77668
C1	Late-up	GATA	Zf,IR4	iTreg-Gata3-ChIP-Seq	GSE20898	Homer	NAGATWNBNATCTNN	1	0.8233	5	0.0101	515.5	0.0105	9.53762
C1	Late-up	PAX6	Paired,Homeobox	Forebrain-Pax6-ChIP-Seq	GSE66961	Homer	NGTGTTCAVTSAAGCGKAAA	1	0.8268	8	0.0162	830.6	0.0169	8.86092
C1	Late-up	REST-NRSF	Zf	Jurkat-NRSF-ChIP-Seq	NA	Homer	GGMGCTGTCCATGGTGCTGA	1	0.8268	1	0.002	90.2	0.0018	12.2683
C1	Late-up	ELF1	ETS	Jurkat-ELF1-ChIP-Seq	SRA014231	Homer	AVCCGGAAGT	1	0.8268	68	0.1379	6916.1	0.1411	6.81931
C1	Late-up	BMYB	HTH	Hela-BMYB-ChIP-Seq	GSE27030	Homer	NHAACBGYYV	1	0.8268	143	0.2901	14434.6	0.2944	6.19438
C1	Late-up	Reverb	NR,DR2	RAW-Reverba.biotin-ChIP-Seq	GSE45914	Homer	GTRGGTCASTGGGTCA	1	0.8406	16	0.0325	1673.2	0.0341	8.70919
C1	Late-up	IRF3	IRF	BMDM-Irf3-ChIP-Seq	GSE67343	Homer	AGTTTCAKTTTC	1	0.8423	25	0.0507	2599.6	0.053	8.90888
C1	Late-up	NPAS2	bHLH	Liver-NPAS2-ChIP-Seq	GSE39860	Homer	KCCACGTGAC	1	0.8423	121	0.2454	12282.5	0.2505	6.1426
C1	Late-up	PSE	SNAPc	K562-mStart-Seq	NA	Homer	WAVTCACCMTAASYDAAAAG	1	0.8423	45	0.0913	4636.6	0.0946	7.0549
C1	Late-up	Unknown	Homeobox	Limb-p300-ChIP-Seq	NA	Homer	SSCMATWAAA	1	0.8426	49	0.0994	5048.9	0.103	6.76582
C1	Late-up	Ronin	THAP	ES-Thap11-ChIP-Seq	GSE51522	Homer	RACTACAACTCCCAGVAKGC	1	0.8426	3	0.0061	320.8	0.0065	9.95423
C1	Late-up	Hnf1	Homeobox	Liver-Foxa2-Chip-Seq	GSE25694	Homer	GGTTAAWCATTAA	1	0.8494	7	0.0142	753.4	0.0154	8.86614
C1	Late-up	HRE	HSF	HepG2-HSF1-ChIP-Seq	GSE31477	Homer	BSTTCTRGAABVTTCYAGAA	1	0.8544	17	0.0345	1802.2	0.0368	8.44025
C1	Late-up	HEB	bHLH	mES-Heb-ChIP-Seq	GSE53233	Homer	VCAGCTGBNN	1	0.8602	232	0.4706	23435.5	0.478	5.47068
C1	Late-up	NPAS	bHLH	Liver-NPAS-ChIP-Seq	GSE39860	Homer	NVCACGTG	1	0.8634	158	0.3205	16067.6	0.3277	5.41316
C1	Late-up	p53	p53	mES-cMyc-ChIP-Seq	GSE11431	Homer	ACATGCCCGGGCAT	1	0.8666	2	0.0041	222.4	0.0045	11.0481
C1	Late-up	Gli2	Zf	GM2-Gli2-ChIP-Chip	GSE112702	Homer	YSTGGGTGGTCT	1	0.8731	37	0.0751	3889.6	0.0793	8.36738
C1	Late-up	p53	p53	Saos-p53-ChIP-Seq	GSE15780	Homer	RRCATGYCYRGRCATGYYYN	1	0.8731	10	0.0203	1094.7	0.0223	8.59219
C1	Late-up	p53	p53	Saos-p53-ChIP-Seq	NA	Homer	RRCATGYCYRGRCATGYYYN	1	0.8731	10	0.0203	1094.7	0.0223	8.59219
C1	Late-up	ZNF415	Zf	HEK293-ZNF415.GFP-ChIP-Seq	GSE58341	Homer	GRTGMTRGAGCC	1	0.8731	73	0.1481	7561	0.1542	6.9449
C1	Late-up	NFkB-p65-Rel	RHD	ThioMac-LPS-Expression	GSE23622	Homer	GGAAATTCCC	1	0.8766	5	0.0101	565.1	0.0115	9.2299
C1	Late-up	Smad2	MAD	ES-SMAD2-ChIP-Seq	GSE29422	Homer	CTGTCTGG	1	0.8776	187	0.3793	19037.7	0.3883	6.10069
C1	Late-up	ZBTB33	Zf	GM12878-ZBTB33-ChIP-Seq	GSE32465	Homer	GGVTCTCGCGAGAAC	1	0.8776	5	0.0101	567.7	0.0116	7.64806
C1	Late-up	Smad4	MAD	ESC-SMAD4-ChIP-Seq	GSE29422	Homer	VBSYGTCTGG	1	0.8776	192	0.3895	19548.8	0.3987	6.4299
C1	Late-up	IRF4	IRF	GM12878-IRF4-ChIP-Seq	GSE32465	Homer	ACTGAAACCA	1	0.8849	34	0.069	3623	0.0739	7.36904
C1	Late-up	Eomes	T-box	H9-Eomes-ChIP-Seq	GSE26097	Homer	ATTAACACCT	1	0.8859	178	0.3611	18181.9	0.3708	5.43685
C1	Late-up	bZIP:IRF	bZIP,IRF	Th17-BatF-ChIP-Seq	GSE39756	Homer	NAGTTTCABTHTGACTNW	1	0.8859	35	0.071	3731.1	0.0761	8.08507
C1	Late-up	PRDM14	Zf	H1-PRDM14-ChIP-Seq	GSE22767	Homer	RGGTCTCTAACY	1	0.8861	32	0.0649	3427.5	0.0699	7.19447
C1	Late-up	ETS:RUNX	ETS,Runt	Jurkat-RUNX1-ChIP-Seq	GSE17954	Homer	RCAGGATGTGGT	1	0.8861	10	0.0203	1124.5	0.0229	8.58104
C1	Late-up	Ascl2	bHLH	ESC-Ascl2-ChIP-Seq	GSE97712	Homer	SSRGCAGCTGCH	1	0.8861	149	0.3022	15297.4	0.312	5.54496
C1	Late-up	RUNX2	Runt	PCa-RUNX2-ChIP-Seq	GSE33889	Homer	NWAACCACADNN	1	0.8861	85	0.1724	8848.7	0.1805	7.6722
C1	Late-up	ZNF41	Zf	HEK293-ZNF41.GFP-ChIP-Seq	GSE58341	Homer	CCTCATGGTGYCYTWYTCCCTTGTG	1	0.8861	2	0.0041	242.2	0.0049	10.7364
C1	Late-up	LRF	Zf	Erythroblasts-ZBTB7A-ChIP-Seq	GSE74977	Homer	AAGACCCYYN	1	0.8874	201	0.4077	20526.9	0.4186	6.78566
C1	Late-up	ZBTB12	Zf	HEK293-ZBTB12.GFP-ChIP-Seq	GSE58341	Homer	NGNTCTAGAACCNGV	1	0.8874	52	0.1055	5508.7	0.1124	7.36575
C1	Late-up	CRX	Homeobox	Retina-Crx-ChIP-Seq	GSE20012	Homer	GCTAATCC	1	0.8874	199	0.4037	20334.6	0.4147	4.85243
C1	Late-up	EKLF	Zf	Erythrocyte-Klf1-ChIP-Seq	GSE20478	Homer	NWGGGTGTGGCY	1	0.8874	28	0.0568	3034.8	0.0619	9.25088
C1	Late-up	ETS:E-box	ETS,bHLH	HPC7-Scl-ChIP-Seq	GSE22178	Homer	AGGAARCAGCTG	1	0.8874	9	0.0183	1033.5	0.0211	10.0153
C1	Late-up	Ptf1a	bHLH	Panc1-Ptf1a-ChIP-Seq	GSE47459	Homer	ACAGCTGTTN	1	0.8874	289	0.5862	29298	0.5975	4.78455
C1	Late-up	ETS	ETS	Promoter	NA	Homer	AACCGGAAGT	1	0.8874	40	0.0811	4288.5	0.0875	7.14795
C1	Late-up	Gata4	Zf	Heart-Gata4-ChIP-Seq	GSE35151	Homer	NBWGATAAGR	1	0.8885	74	0.1501	7785.9	0.1588	6.51598
C1	Late-up	Max	bHLH	K562-Max-ChIP-Seq	GSE31477	Homer	RCCACGTGGYYN	1	0.8971	73	0.1481	7705.9	0.1572	6.60803
C1	Late-up	TATA-Box	TBP	Promoter	NA	Homer	CCTTTTAWAGSC	1	0.8994	107	0.217	11170.6	0.2278	5.68259
C1	Late-up	PRDM10	Zf	HEK293-PRDM10.eGFP-ChIP-Seq	Encode	Homer	TGGTACATTCCA	1	0.9001	68	0.1379	7210.9	0.1471	7.35354
C1	Late-up	AP-2alpha	AP2	Hela-AP2alpha-ChIP-Seq	GSE31477	Homer	ATGCCCTGAGGC	1	0.9001	118	0.2394	12292.8	0.2507	6.80067
C1	Late-up	Pitx1:Ebox	Homeobox,bHLH	Hindlimb-Pitx1-ChIP-Seq	GSE41591	Homer	YTAATTRAWWCCAGATGT	1	0.9007	12	0.0243	1387.5	0.0283	8.90411
C1	Late-up	Tcf7	HMG	GM12878-TCF7-ChIP-Seq	Encode	Homer	CTTTGATGTGSB	1	0.9049	28	0.0568	3096.3	0.0631	8.21097
C1	Late-up	STAT5	Stat	mCD4+-Stat5-ChIP-Seq	GSE12346	Homer	RTTTCTNAGAAA	1	0.9053	29	0.0588	3205	0.0654	6.28542
C1	Late-up	NFkB-p65	RHD	GM12787-p65-ChIP-Seq	GSE19485	Homer	WGGGGATTTCCC	1	0.9107	51	0.1034	5507.8	0.1123	7.18817
C1	Late-up	c-Myc	bHLH	mES-cMyc-ChIP-Seq	GSE11431	Homer	VVCCACGTGG	1	0.9107	56	0.1136	6024.6	0.1229	6.80884
C1	Late-up	Tbet	T-box	CD8-Tbet-ChIP-Seq	GSE33802	Homer	AGGTGTGAAM	1	0.911	90	0.1826	9517.1	0.1941	6.74206
C1	Late-up	IRF8	IRF	BMDM-IRF8-ChIP-Seq	GSE77884	Homer	GRAASTGAAAST	1	0.911	25	0.0507	2804.9	0.0572	8.61756
C1	Late-up	TFE3	bHLH	MEF-TFE3-ChIP-Seq	GSE75757	Homer	GTCACGTGACYV	1	0.911	7	0.0142	858.5	0.0175	8.32268
C1	Late-up	FOXA1:AR	Forkhead,NR	LNCAP-AR-ChIP-Seq	GSE27824	Homer	AGTAAACAAAAAAGAACAND	1	0.911	6	0.0122	745	0.0152	10.6039
C1	Late-up	Elk1	ETS	Hela-Elk1-ChIP-Seq	GSE31477	Homer	HACTTCCGGY	1	0.9167	70	0.142	7507.6	0.1531	6.72183
C1	Late-up	RUNX1	Runt	Jurkat-RUNX1-ChIP-Seq	GSE29180	Homer	AAACCACARM	1	0.9167	103	0.2089	10880	0.2219	6.64863
C1	Late-up	Nr5a2	NR	Pancreas-LRH1-ChIP-Seq	GSE34295	Homer	BTCAAGGTCA	1	0.9167	84	0.1704	8953	0.1826	7.02113
C1	Late-up	TEAD1	TEAD	HepG2-TEAD1-ChIP-Seq	Encode	Homer	CYRCATTCCA	1	0.9198	84	0.1704	8967.8	0.1829	4.44236
C1	Late-up	AMYB	HTH	Testes-AMYB-ChIP-Seq	GSE44588	Homer	TGGCAGTTGG	1	0.9198	148	0.3002	15469.3	0.3155	5.00906
C1	Late-up	Nkx3.1	Homeobox	LNCaP-Nkx3.1-ChIP-Seq	GSE28264	Homer	AAGCACTTAA	1	0.9198	216	0.4381	22292.3	0.4547	5.53405
C1	Late-up	ZNF7	Zf	HepG2-ZNF7.Flag-ChIP-Seq	Encode	Homer	CTGCCWVCTTTTRTA	1	0.9198	44	0.0892	4853.3	0.099	6.31438
C1	Late-up	Mouse_Recombination_Hotspot	Zf	Testis-DMC1-ChIP-Seq	GSE24438	Homer	ACTYKNATTCGTGNTACTTC	1	0.9227	4	0.0081	539.1	0.011	9.68214
C1	Late-up	GLI3	Zf	Limb-GLI3-ChIP-Chip	GSE11077	Homer	CGTGGGTGGTCC	1	0.9248	14	0.0284	1677.4	0.0342	8.5549
C1	Late-up	HIF-1b	HLH	T47D-HIF1b-ChIP-Seq	GSE59937	Homer	RTACGTGC	1	0.9257	113	0.2292	11982	0.2444	5.71312
C1	Late-up	n-Myc	bHLH	mES-nMyc-ChIP-Seq	GSE11431	Homer	VRCCACGTGG	1	0.9257	76	0.1542	8202.9	0.1673	5.71927
C1	Late-up	BMAL1	bHLH	Liver-Bmal1-ChIP-Seq	GSE39860	Homer	GNCACGTG	1	0.9287	174	0.3529	18170.1	0.3706	4.83962
C1	Late-up	GFY-Staf	?,Zf	Promoter	NA	Homer	RACTACAATTCCCAGAAKGC	1	0.9291	5	0.0101	673.3	0.0137	4.60953
C1	Late-up	SCRT1	Zf	HEK293-SCRT1.eGFP-ChIP-Seq	Encode	Homer	GCAACAGGTG	1	0.937	31	0.0629	3550.9	0.0724	6.32471
C1	Late-up	HNF1b	Homeobox	PDAC-HNF1B-ChIP-Seq	GSE64557	Homer	GTTAATNATTAA	1	0.941	6	0.0122	807.9	0.0165	8.55189
C1	Late-up	HINFP	Zf	K562-HINFP.eGFP-ChIP-Seq	Encode	Homer	TWVGGTCCGC	1	0.9455	43	0.0872	4850.1	0.0989	6.66582
C1	Late-up	p63	p53	Keratinocyte-p63-ChIP-Seq	GSE17611	Homer	NNDRCATGYCYNRRCATGYH	1	0.9455	38	0.0771	4324.9	0.0882	6.98559
C1	Late-up	GFX	?	Promoter	NA	Homer	ATTCTCGCGAGA	1	0.9477	1	0.002	178.4	0.0036	9.30792
C1	Late-up	Tbx6	T-box	ESC-Tbx6-ChIP-Seq	GSE93524	Homer	DAGGTGTBAA	1	0.9505	98	0.1988	10594.4	0.2161	6.34926
C1	Late-up	GRHL2	CP2	HBE-GRHL2-ChIP-Seq	GSE46194	Homer	AAACYKGTTWDACMRGTTTB	1	0.9545	32	0.0649	3723.1	0.0759	6.95492
C1	Late-up	PRDM9	Zf	Testis-DMC1-ChIP-Seq	GSE35498	Homer	ADGGYAGYAGCATCT	1	0.9558	46	0.0933	5222.2	0.1065	8.02355
C1	Late-up	Arnt:Ahr	bHLH	MCF7-Arnt-ChIP-Seq	Lo_et_al.	Homer	TBGCACGCAA	1	0.9587	67	0.1359	7440.8	0.1518	6.1015
C1	Late-up	RAR:RXR	NR,DR5	ES-RAR-ChIP-Seq	GSE56893	Homer	RGGTCADNNAGAGGTCAV	1	0.9685	2	0.0041	346.2	0.0071	9.38952
C1	Late-up	RAR:RXR	NR,DR5	ES-RAR-ChIP-Seq	GSE56893	Homer	RGGTCADNNAGAGGTCAV	1	0.9685	2	0.0041	346.2	0.0071	11.1934
C1	Late-up	Six1	Homeobox	Myoblast-Six1-ChIP-Chip	GSE20150	Homer	GKVTCADRTTWC	1	0.9685	17	0.0345	2132.8	0.0435	8.09506
C1	Late-up	PRDM15	Zf	ESC-Prdm15-ChIP-Seq	GSE73694	Homer	YCCDNTCCAGGTTTT	1	0.9685	110	0.2231	11936.2	0.2434	6.4143
C1	Late-up	Otx2	Homeobox	EpiLC-Otx2-ChIP-Seq	GSE56098	Homer	NYTAATCCYB	1	0.9778	68	0.1379	7641.8	0.1559	6.67091
C1	Late-up	Nkx2.2	Homeobox	NPC-Nkx2.2-ChIP-Seq	GSE61673	Homer	BTBRAGTGSN	1	0.9778	195	0.3955	20615.9	0.4205	6.13009
C1	Late-up	Gata1	Zf	K562-GATA1-ChIP-Seq	GSE18829	Homer	SAGATAAGRV	1	0.9778	39	0.0791	4574.5	0.0933	6.40298
C1	Late-up	Barx1	Homeobox	Stomach-Barx1.3xFlag-ChIP-Seq	GSE69483	Homer	AAACMATTAN	1	0.9784	29	0.0588	3511	0.0716	6.18251
C1	Late-up	Brachyury	T-box	Mesoendoderm-Brachyury-ChIP-exo	GSE54963	Homer	ANTTMRCASBNNNGTGYKAAN	1	0.9784	20	0.0406	2519.1	0.0514	7.37112
C1	Late-up	ZNF317	Zf	HEK293-ZNF317.GFP-ChIP-Seq	GSE58341	Homer	GTCWGCTGTYYCTCT	1	0.9784	6	0.0122	897.7	0.0183	9.52519
C1	Late-up	ZKSCAN1	Zf	HepG2-ZKSCAN1-ChIP-Seq	Encode	Homer	GCACAYAGTAGGKCY	1	0.9814	2	0.0041	379.2	0.0077	10.0667
C1	Late-up	STAT1	Stat	HelaS3-STAT1-ChIP-Seq	GSE12782	Homer	NATTTCCNGGAAAT	1	0.9827	21	0.0426	2664	0.0543	7.98429
C1	Late-up	TCFL2	HMG	K562-TCF7L2-ChIP-Seq	GSE29196	Homer	ACWTCAAAGG	1	0.9914	5	0.0101	806.8	0.0165	7.7909
C1	Late-up	Gata2	Zf	K562-GATA2-ChIP-Seq	GSE18829	Homer	BBCTTATCTS	1	0.9914	43	0.0872	5118.8	0.1044	6.67483
C1	Late-up	IRF2	IRF	Erythroblas-IRF2-ChIP-Seq	GSE36985	Homer	GAAASYGAAASY	1	0.9914	5	0.0101	812.2	0.0166	8.04207
C1	Late-up	GATA3	Zf,DR8	iTreg-Gata3-ChIP-Seq	GSE20898	Homer	AGATSTNDNNDSAGATAASN	1	0.9914	4	0.0081	687.5	0.014	9.25002
C1	Late-up	E2F	E2F	Hela-CellCycle-Expression	NA	Homer	TTSGCGCGAAAA	1	0.997	4	0.0081	701.9	0.0143	8.4865
C1	Late-up	Bapx1	Homeobox	VertebralCol-Bapx1-ChIP-Seq	GSE36672	Homer	TTRAGTGSYK	1	0.997	199	0.4037	21296.5	0.4343	6.03763
C1	Late-up	ISRE	IRF	ThioMac-LPS-Expression	GSE23622	Homer	AGTTTCASTTTC	1	1	2	0.0041	439.2	0.009	10.5125
C1	Late-up	GATA3	Zf,DR4	iTreg-Gata3-ChIP-Seq	GSE20898	Homer	AGATGKDGAGATAAG	1	1	3	0.0061	591.4	0.0121	8.17976
C1	Late-up	Bcl6	Zf	Liver-Bcl6-ChIP-Seq	GSE31578	Homer	NNNCTTTCCAGGAAA	1	1	130	0.2637	14405.3	0.2938	6.52264
C1	Late-up	DUX4	Homeobox	Myoblasts-DUX4.V5-ChIP-Seq	GSE75791	Homer	NWTAAYCYAATCAWN	1	1	1	0.002	275.6	0.0056	10.3594
C1	Late-up	MNT	bHLH	HepG2-MNT-ChIP-Seq	Encode	Homer	DGCACACGTG	1	1	98	0.1988	11111.9	0.2266	4.96758
C1	Late-up	GSC	Homeobox	FrogEmbryos-GSC-ChIP-Seq	DRA000576	Homer	RGGATTAR	1	1	90	0.1826	10300.9	0.2101	6.27719
C1	Late-up	NRF1	NRF	MCF7-NRF1-ChIP-Seq	Unpublished	Homer	CTGCGCATGCGC	1	1	18	0.0365	2481.8	0.0506	8.59578
C1	Late-up	Nkx2.5	Homeobox	HL1-Nkx2.5.biotin-ChIP-Seq	GSE21529	Homer	RRSCACTYAA	1	1	206	0.4178	22178.5	0.4523	5.89817
C1	Late-up	TEAD	TEA	Fibroblast-PU.1-ChIP-Seq	Unpublished	Homer	YCWGGAATGY	1	1	47	0.0953	5832.8	0.119	8.29002
C1	Late-up	TRPS1	Zf	MCF7-TRPS1-ChIP-Seq	GSE107013	Homer	AGATAAGANN	1	1	132	0.2677	14887.4	0.3036	5.50203
C1	Late-up	NFkB-p50,p52	RHD	Monocyte-p50-ChIP-Chip	Schreiber_et_al.	Homer	GGGGGAATCCCC	1	1	10	0.0203	1624.5	0.0331	8.67192
C1	Late-up	IRF:BATF	IRF:bZIP	pDC-Irf8-ChIP-Seq	GSE66899	Homer	CTTTCANTATGACTV	1	1	4	0.0081	836.9	0.0171	9.61967
C1	Late-up	Nr5a2	NR	mES-Nr5a2-ChIP-Seq	GSE19019	Homer	BTCAAGGTCA	1	1	56	0.1136	6942.7	0.1416	7.61376
C1	Late-up	GATA3	Zf	iTreg-Gata3-ChIP-Seq	GSE20898	Homer	AGATAASR	1	1	97	0.1968	11442	0.2334	5.93828
C1	Late-up	Gata6	Zf	HUG1N-GATA6-ChIP-Seq	GSE51936	Homer	YCTTATCTBN	1	1	54	0.1095	6915.9	0.1411	6.28786
C1	Late-up	NRF	NRF	Promoter	NA	Homer	STGCGCATGCGC	1	1	18	0.0365	2842.1	0.058	1.45717
C1	Late-up	Nkx2.1	Homeobox	LungAC-Nkx2.1-ChIP-Seq	GSE43252	Homer	RSCACTYRAG	1	1	257	0.5213	28078.7	0.5727	5.68755
C1	Late-up	Duxbl	Homeobox	NIH3T3-Duxbl.HA-ChIP-Seq	GSE119782	Homer	TAAYCYAATCAA	1	1	1	0.002	516.9	0.0105	8.8731
C1	Late-up	ZEB2	Zf	SNU398-ZEB2-ChIP-Seq	GSE103048	Homer	GNMCAGGTGTGC	1	1	103	0.2089	12905.3	0.2632	6.93338
C1	Late-up	RARg	NR	ES-RARg-ChIP-Seq	GSE30538	Homer	AGGTCAAGGTCA	1	1	3	0.0061	1153.6	0.0235	11.1266
C1	Late-up	YY1	Zf	Promoter	NA	Homer	CAAGATGGCGGC	1	1	3	0.0061	1204.6	0.0246	8.7834
C1	Late-up	Slug	Zf	Mesoderm-Snai2-ChIP-Seq	GSE61475	Homer	SNGCACCTGCHS	1	1	51	0.1034	8162.3	0.1665	7.2621
C1	Late-up	E2A	bHLH,near_PU.1	Bcell-PU.1-ChIP-Seq	GSE21512	Homer	NVCACCTGBN	1	1	138	0.2799	18336.1	0.374	7.41752
C1	Late-up	ZEB1	Zf	PDAC-ZEB1-ChIP-Seq	GSE64557	Homer	VCAGGTRDRY	1	1	149	0.3022	20868.3	0.4256	5.94141
C1	Late-up	EBNA1	EBV-virus	Raji-EBNA1-ChIP-Seq	GSE30709	Homer	GGYAGCAYDTGCTDCCCNNN	1	1	0	0	200.5	0.0041	11.187
C1	Late-up	Pax7	Paired,Homeobox,long	Myoblast-Pax7-ChIP-Seq	GSE25064	Homer	TAATCHGATTAC	1	1	0	0	110.5	0.0023	9.80349
C1	Late-up	T1ISRE	IRF	ThioMac-Ifnb-Expression	NA	Homer	ACTTTCGTTTCT	1	1	0	0	103	0.0021	11.712
C1	Late-up	ZFP3	Zf	HEK293-ZFP3.GFP-ChIP-Seq	GSE58341	Homer	GGGTTTTGAAGGATGARTAGGAGTT	1	1	0	0	16.2	0.0003	6.71656
C1	Late-up	ZNF16	Zf	HEK293-ZNF16.GFP-ChIP-Seq	GSE58341	Homer	MACCTTCYATGGCTCCCTAKTGCCY	1	1	0	0	101.7	0.0021	9.5569
C1	Late-up	ZNF528	Zf	HEK293-ZNF528.GFP-ChIP-Seq	GSE58341	Homer	AGAAATGACTTCCCT	1	1	0	0	57.1	0.0012	12.8603
C2	Early-down	Tcf12	bHLH	GM12878-Tcf12-ChIP-Seq	GSE32465	Homer	VCAGCTGYTG	1e-12	0	123	0.4409	11906.2	0.2446	7.14623
C2	Early-down	Ap4	bHLH	AML-Tfap4-ChIP-Seq	GSE45738	Homer	NAHCAGCTGD	1e-12	0	141	0.5054	14679.8	0.3016	6.11698
C2	Early-down	Atoh1	bHLH	Cerebellum-Atoh1-ChIP-Seq	GSE22111	Homer	VNRVCAGCTGGY	1e-11	0	128	0.4588	12873.4	0.2645	6.0307
C2	Early-down	Sox4	HMG	proB-Sox4-ChIP-Seq	GSE50066	Homer	YCTTTGTTCC	1e-10	0	95	0.3405	8664.1	0.178	7.06867
C2	Early-down	Tcf21	bHLH	ArterySmoothMuscle-Tcf21-ChIP-Seq	GSE61369	Homer	NAACAGCTGG	1e-09	0	114	0.4086	11564.4	0.2376	6.46026
C2	Early-down	Myf5	bHLH	GM-Myf5-ChIP-Seq	GSE24852	Homer	BAACAGCTGT	1e-09	0	94	0.3369	8787.5	0.1805	7.32271
C2	Early-down	Sox9	HMG	Limb-SOX9-ChIP-Seq	GSE73225	Homer	AGGVNCCTTTGT	1e-09	0	96	0.3441	9152	0.188	7.19245
C2	Early-down	BHLHA15	bHLH	NIH3T3-BHLHB8.HA-ChIP-Seq	GSE119782	Homer	NAMCAGCTGK	1e-09	0	142	0.509	16070.5	0.3302	6.8237
C2	Early-down	Atf7	bZIP	3T3L1-Atf7-ChIP-Seq	GSE56872	Homer	NGRTGACGTCAY	1e-09	0	59	0.2115	4401.1	0.0904	6.73534
C2	Early-down	Atf2	bZIP	3T3L1-Atf2-ChIP-Seq	GSE56872	Homer	NRRTGACGTCAT	1e-09	0	47	0.1685	3062.1	0.0629	7.09852
C2	Early-down	c-Jun-CRE	bZIP	K562-cJun-ChIP-Seq	GSE31477	Homer	ATGACGTCATCY	1e-08	0	43	0.1541	2731	0.0561	7.33792
C2	Early-down	Sox6	HMG	Myotubes-Sox6-ChIP-Seq	GSE32627	Homer	CCATTGTTNY	1e-08	0	130	0.4659	14739.9	0.3028	6.33114
C2	Early-down	MyoG	bHLH	C2C12-MyoG-ChIP-Seq	GSE36024	Homer	AACAGCTG	1e-07	0	119	0.4265	13131.8	0.2698	6.58794
C2	Early-down	Sox3	HMG	NPC-Sox3-ChIP-Seq	GSE33059	Homer	CCWTTGTY	1e-07	0	141	0.5054	16625.2	0.3416	6.56384
C2	Early-down	Sox10	HMG	SciaticNerve-Sox3-ChIP-Seq	GSE35132	Homer	CCWTTGTYYB	1e-07	0	137	0.491	16076.6	0.3303	6.6401
C2	Early-down	MyoD	bHLH	Myotube-MyoD-ChIP-Seq	GSE21614	Homer	RRCAGCTGYTSY	1e-07	0	98	0.3513	10196.9	0.2095	7.24983
C2	Early-down	JunB	bZIP	DendriticCells-Junb-ChIP-Seq	GSE36099	Homer	RATGASTCAT	1e-07	0	56	0.2007	4643.8	0.0954	6.68931
C2	Early-down	Fra1	bZIP	BT549-Fra1-ChIP-Seq	GSE46166	Homer	NNATGASTCATH	1e-07	0	55	0.1971	4545.4	0.0934	7.01174
C2	Early-down	Sox15	HMG	CPA-Sox15-ChIP-Seq	GSE62909	Homer	RAACAATGGN	1e-06	0	97	0.3477	10380.4	0.2133	7.12231
C2	Early-down	Atf1	bZIP	K562-ATF1-ChIP-Seq	GSE31477	Homer	GATGACGTCA	1e-06	0	67	0.2401	6181.4	0.127	6.25078
C2	Early-down	Twist2	bHLH	Myoblast-Twist2.Ty1-ChIP-Seq	GSE127998	Homer	MCAGCTGBYH	1e-06	0	157	0.5627	19966.1	0.4102	3.81893
C2	Early-down	Sox2	HMG	mES-Sox2-ChIP-Seq	GSE11431	Homer	BCCATTGTTC	1e-06	0	85	0.3047	8809	0.181	6.78547
C2	Early-down	Jun-AP1	bZIP	K562-cJun-ChIP-Seq	GSE31477	Homer	GATGASTCATCN	1e-06	0	32	0.1147	2054.2	0.0422	8.48626
C2	Early-down	BATF	bZIP	Th17-BATF-ChIP-Seq	GSE39756	Homer	DATGASTCAT	1e-06	0	61	0.2186	5600.1	0.1151	6.40806
C2	Early-down	Atf3	bZIP	GBM-ATF3-ChIP-Seq	GSE33912	Homer	DATGASTCATHN	1e-06	0	60	0.2151	5525.9	0.1135	5.97965
C2	Early-down	Fosl2	bZIP	3T3L1-Fosl2-ChIP-Seq	GSE56872	Homer	NATGASTCABNN	1e-05	0	38	0.1362	2904.2	0.0597	7.02941
C2	Early-down	Fra2	bZIP	Striatum-Fra2-ChIP-Seq	GSE43429	Homer	GGATGACTCATC	1e-05	0	47	0.1685	4045.2	0.0831	6.38445
C2	Early-down	AP-1	bZIP	ThioMac-PU.1-ChIP-Seq	GSE21512	Homer	VTGACTCATC	1e-05	0.0001	64	0.2294	6365	0.1308	6.04954
C2	Early-down	NeuroG2	bHLH	Fibroblast-NeuroG2-ChIP-Seq	GSE75910	Homer	ACCATCTGTT	1e-05	0.0001	135	0.4839	17198.6	0.3534	5.7876
C2	Early-down	TCF4	bHLH	SHSY5Y-TCF4-ChIP-Seq	GSE96915	Homer	SMCATCTGKH	1e-05	0.0001	136	0.4875	17396.3	0.3574	7.0005
C2	Early-down	Ascl1	bHLH	NeuralTubes-Ascl1-ChIP-Seq	GSE55840	Homer	NNVVCAGCTGBN	1e-05	0.0001	143	0.5125	18722.1	0.3847	6.24294
C2	Early-down	ZBTB18	Zf	HEK293-ZBTB18.GFP-ChIP-Seq	GSE58341	Homer	AACATCTGGA	0.0001	0.0002	61	0.2186	6142.1	0.1262	7.77411
C2	Early-down	NeuroD1	bHLH	Islet-NeuroD1-ChIP-Seq	GSE30298	Homer	GCCATCTGTT	0.0001	0.0002	85	0.3047	9701.2	0.1993	7.08142
C2	Early-down	Ascl2	bHLH	ESC-Ascl2-ChIP-Seq	GSE97712	Homer	SSRGCAGCTGCH	0.0001	0.0002	115	0.4122	14353.8	0.2949	5.54496
C2	Early-down	JunD	bZIP	K562-JunD-ChIP-Seq	NA	Homer	ATGACGTCATCN	0.0001	0.0002	17	0.0609	895.7	0.0184	8.84006
C2	Early-down	Sox17	HMG	Endoderm-Sox17-ChIP-Seq	GSE61475	Homer	CCATTGTTYB	0.0001	0.0004	64	0.2294	6789.9	0.1395	6.82454
C2	Early-down	Mef2c	MADS	GM12878-Mef2c-ChIP-Seq	GSE32465	Homer	DCYAAAAATAGM	0.001	0.0016	35	0.1254	3143.1	0.0646	7.87448
C2	Early-down	Mef2d	MADS	Retina-Mef2d-ChIP-Seq	GSE61391	Homer	GCTATTTTTAGC	0.001	0.0017	19	0.0681	1267	0.026	8.64724
C2	Early-down	BMYB	HTH	Hela-BMYB-ChIP-Seq	GSE27030	Homer	NHAACBGYYV	0.001	0.0018	115	0.4122	15034	0.3089	6.19438
C2	Early-down	Olig2	bHLH	Neuron-Olig2-ChIP-Seq	GSE30882	Homer	RCCATMTGTT	0.001	0.0046	145	0.5197	20407.2	0.4193	6.05339
C2	Early-down	SCL	bHLH	HPC7-Scl-ChIP-Seq	GSE13511	Homer	AVCAGCTG	0.01	0.0106	245	0.8781	39293.7	0.8073	5.10049
C2	Early-down	GATA:SCL	Zf,bHLH	Ter119-SCL-ChIP-Seq	GSE18720	Homer	CRGCTGBNGNSNNSAGATAA	0.01	0.0106	16	0.0573	1146.5	0.0236	8.5623
C2	Early-down	Zfp281	Zf	ES-Zfp281-ChIP-Seq	GSE81042	Homer	CCCCTCCCCCAC	0.01	0.0106	37	0.1326	3794.6	0.078	9.77408
C2	Early-down	Bach2	bZIP	OCILy7-Bach2-ChIP-Seq	GSE44420	Homer	TGCTGAGTCA	0.01	0.0142	21	0.0753	1773.3	0.0364	8.69735
C2	Early-down	Ptf1a	bHLH	Panc1-Ptf1a-ChIP-Seq	GSE47459	Homer	ACAGCTGTTN	0.01	0.0153	188	0.6738	28554.4	0.5867	4.78455
C2	Early-down	RBPJ:Ebox	?,bHLH	Panc1-Rbpj1-ChIP-Seq	GSE47459	Homer	GGGRAARRGRMCAGMTG	0.01	0.0176	37	0.1326	3921.3	0.0806	8.85279
C2	Early-down	E2A	bHLH	proBcell-E2A-ChIP-Seq	GSE21978	Homer	DNRCAGCTGY	0.01	0.0201	125	0.448	17705.3	0.3638	6.42721
C2	Early-down	CTCF	Zf	CD4+-CTCF-ChIP-Seq	Barski_et_al.	Homer	AYAGTGCCMYCTRGTGGCCA	0.01	0.0378	20	0.0717	1816.1	0.0373	8.70484
C2	Early-down	HEB	bHLH	mES-Heb-ChIP-Seq	GSE53233	Homer	VCAGCTGBNN	0.01	0.0516	148	0.5305	22096.5	0.454	5.47068
C2	Early-down	Sp2	Zf	HEK293-Sp2.eGFP-ChIP-Seq	Encode	Homer	YGGCCCCGCCCC	0.01	0.0739	129	0.4624	19033.6	0.3911	5.66256
C2	Early-down	NFIL3	bZIP	HepG2-NFIL3-ChIP-Seq	Encode	Homer	VTTACGTAAYNNNNN	0.1	0.0858	39	0.1398	4652.3	0.0956	6.41388
C2	Early-down	CRE	bZIP	Promoter	NA	Homer	CSGTGACGTCAC	0.1	0.0889	24	0.086	2527	0.0519	5.91825
C2	Early-down	Tbet	T-box	CD8-Tbet-ChIP-Seq	GSE33802	Homer	AGGTGTGAAM	0.1	0.0927	73	0.2616	9932.4	0.2041	6.74206
C2	Early-down	BORIS	Zf	K562-CTCFL-ChIP-Seq	GSE32465	Homer	CNNBRGCGCCCCCTGSTGGC	0.1	0.0927	29	0.1039	3240.2	0.0666	9.03288
C2	Early-down	Oct4:Sox17	POU,Homeobox,HMG	F9-Sox17-ChIP-Seq	GSE44553	Homer	CCATTGTATGCAAAT	0.1	0.1	13	0.0466	1118	0.023	8.78869
C2	Early-down	Tbr1	T-box	Cortex-Tbr1-ChIP-Seq	GSE71384	Homer	AAGGTGTKAA	0.1	0.1057	89	0.319	12600.9	0.2589	6.12153
C2	Early-down	Oct11	POU,Homeobox	NCIH1048-POU2F3-ChIP-seq	GSE115123	Homer	GATTTGCATA	0.1	0.1116	24	0.086	2599.7	0.0534	6.63361
C2	Early-down	Tbx21	T-box	GM12878-TBX21-ChIP-Seq	Encode	Homer	AGGTGTGAAA	0.1	0.127	68	0.2437	9312.3	0.1913	6.62472
C2	Early-down	REST-NRSF	Zf	Jurkat-NRSF-ChIP-Seq	NA	Homer	GGMGCTGTCCATGGTGCTGA	0.1	0.1353	3	0.0108	98.9	0.002	12.2683
C2	Early-down	EBF	EBF	proBcell-EBF-ChIP-Seq	GSE21978	Homer	DGTCCCYRGGGA	0.1	0.1443	22	0.0789	2394.3	0.0492	8.59001
C2	Early-down	Znf263	Zf	K562-Znf263-ChIP-Seq	GSE31477	Homer	CVGTSCTCCC	0.1	0.1576	142	0.509	21794.1	0.4478	3.87722
C2	Early-down	Zic3	Zf	mES-Zic3-ChIP-Seq	GSE37889	Homer	GGCCYCCTGCTGDGH	0.1	0.1577	58	0.2079	7851.5	0.1613	7.88465
C2	Early-down	KLF6	Zf	PDAC-KLF6-ChIP-Seq	GSE64557	Homer	MKGGGYGTGGCC	0.1	0.16	97	0.3477	14192.3	0.2916	5.44761
C2	Early-down	Eomes	T-box	H9-Eomes-ChIP-Seq	GSE26097	Homer	ATTAACACCT	0.1	0.1766	126	0.4516	19143.1	0.3933	5.43685
C2	Early-down	Smad3	MAD	NPC-Smad3-ChIP-Seq	GSE36673	Homer	TWGTCTGV	0.1	0.196	185	0.6631	29542.2	0.607	6.11917
C2	Early-down	AMYB	HTH	Testes-AMYB-ChIP-Seq	GSE44588	Homer	TGGCAGTTGG	0.1	0.2233	106	0.3799	15916.2	0.327	5.00906
C2	Early-down	Rfx6	HTH	Min6b1-Rfx6.HA-ChIP-Seq	GSE62844	Homer	TGTTKCCTAGCAACM	0.1	0.2513	89	0.319	13156.8	0.2703	3.33026
C2	Early-down	Tgif1	Homeobox	mES-Tgif1-ChIP-Seq	GSE55404	Homer	YTGWCADY	0.1	0.2677	174	0.6237	27813.7	0.5715	4.97491
C2	Early-down	GLI3	Zf	Limb-GLI3-ChIP-Chip	GSE11077	Homer	CGTGGGTGGTCC	0.1	0.2781	14	0.0502	1472	0.0302	8.5549
C2	Early-down	ZNF41	Zf	HEK293-ZNF41.GFP-ChIP-Seq	GSE58341	Homer	CCTCATGGTGYCYTWYTCCCTTGTG	0.1	0.2781	4	0.0143	233.2	0.0048	10.7364
C2	Early-down	Srebp1a	bHLH	HepG2-Srebp1a-ChIP-Seq	GSE31477	Homer	RTCACSCCAY	0.1	0.2781	18	0.0645	2031.4	0.0417	7.91168
C2	Early-down	Rfx5	HTH	GM12878-Rfx5-ChIP-Seq	GSE31477	Homer	SCCTAGCAACAG	0.1	0.2924	33	0.1183	4279.8	0.0879	8.12207
C2	Early-down	ZKSCAN1	Zf	HepG2-ZKSCAN1-ChIP-Seq	Encode	Homer	GCACAYAGTAGGKCY	0.1	0.2924	5	0.0179	347.7	0.0071	10.0667
C2	Early-down	Brachyury	T-box	Mesoendoderm-Brachyury-ChIP-exo	GSE54963	Homer	ANTTMRCASBNNNGTGYKAAN	0.1	0.2924	23	0.0824	2783.9	0.0572	7.37112
C2	Early-down	Klf4	Zf	mES-Klf4-ChIP-Seq	GSE11431	Homer	GCCACACCCA	0.1	0.3035	39	0.1398	5236.7	0.1076	7.33396
C2	Early-down	Rbpj1	?	Panc1-Rbpj1-ChIP-Seq	GSE47459	Homer	HTTTCCCASG	0.1	0.3035	102	0.3656	15518.5	0.3188	6.78071
C2	Early-down	Mef2a	MADS	HL1-Mef2a.biotin-ChIP-Seq	GSE21529	Homer	CYAAAAATAG	0.1	0.3035	25	0.0896	3105.7	0.0638	7.66895
C2	Early-down	USF1	bHLH	GM12878-Usf1-ChIP-Seq	GSE32465	Homer	SGTCACGTGR	0.1	0.3109	37	0.1326	4951.1	0.1017	6.62948
C2	Early-down	Phox2a	Homeobox	Neuron-Phox2a-ChIP-Seq	GSE31456	Homer	YTAATYNRATTA	0.1	0.3369	21	0.0753	2554.4	0.0525	7.17589
C2	Early-down	THRa	NR	C17.2-THRa-ChIP-Seq	GSE38347	Homer	GGTCANYTGAGGWCA	0.1	0.3422	35	0.1254	4691.9	0.0964	7.77288
C2	Early-down	bHLHE40	bHLH	HepG2-BHLHE40-ChIP-Seq	GSE31477	Homer	KCACGTGMCN	0.1	0.3422	27	0.0968	3463.4	0.0712	7.06883
C2	Early-down	Pitx1:Ebox	Homeobox,bHLH	Hindlimb-Pitx1-ChIP-Seq	GSE41591	Homer	YTAATTRAWWCCAGATGT	0.1	0.3422	14	0.0502	1554.7	0.0319	8.90411
C2	Early-down	HIC1	Zf	Treg-ZBTB29-ChIP-Seq	GSE99889	Homer	TGCCAGCB	0.1	0.3455	150	0.5376	23912.8	0.4913	5.97511
C2	Early-down	THRb	NR	HepG2-THRb.Flag-ChIP-Seq	Encode	Homer	GGTCACCTGAGGTCA	0.1	0.3529	48	0.172	6779.7	0.1393	7.16567
C2	Early-down	Reverb	NR,DR2	RAW-Reverba.biotin-ChIP-Seq	GSE45914	Homer	GTRGGTCASTGGGTCA	0.1	0.3648	13	0.0466	1440.1	0.0296	8.70919
C2	Early-down	Oct4	POU,Homeobox	mES-Oct4-ChIP-Seq	GSE11431	Homer	ATTTGCATAW	0.1	0.3761	29	0.1039	3830.2	0.0787	7.32558
C2	Early-down	CHR	?	Hela-CellCycle-Expression	NA	Homer	SRGTTTCAAA	0.1	0.3955	37	0.1326	5104.8	0.1049	7.76332
C2	Early-down	Foxo1	Forkhead	RAW-Foxo1-ChIP-Seq	Fan_et_al.	Homer	CTGTTTAC	0.1	0.3965	116	0.4158	18189.9	0.3737	6.16467
C2	Early-down	TATA-Box	TBP	Promoter	NA	Homer	CCTTTTAWAGSC	0.1	0.3965	80	0.2867	12111.4	0.2488	5.68259
C2	Early-down	Sp5	Zf	mES-Sp5.Flag-ChIP-Seq	GSE72989	Homer	RGKGGGCGGAGC	0.1	0.3965	93	0.3333	14300.8	0.2938	6.51975
C2	Early-down	AR-halfsite	NR	LNCaP-AR-ChIP-Seq	GSE27824	Homer	CCAGGAACAG	0.1	0.3965	214	0.767	35475.7	0.7289	5.19383
C2	Early-down	DUX4	Homeobox	Myoblasts-DUX4.V5-ChIP-Seq	GSE75791	Homer	NWTAAYCYAATCAWN	0.1	0.4067	4	0.0143	292.4	0.006	10.3594
C2	Early-down	Mef2b	MADS	HEK293-Mef2b.V5-ChIP-Seq	GSE67450	Homer	GCTATTTTTGGM	0.1	0.4326	46	0.1649	6617.8	0.136	6.85072
C2	Early-down	Prop1	Homeobox	GHFT1-PROP1.biotin-ChIP-Seq	GSE77302	Homer	NTAATBNAATTA	0.1	0.4326	30	0.1075	4075.1	0.0837	6.55312
C2	Early-down	NF1-halfsite	CTF	LNCaP-NF1-ChIP-Seq	Unpublished	Homer	YTGCCAAG	0.1	0.4326	120	0.4301	18983.2	0.39	6.73433
C2	Early-down	CEBP:CEBP	bZIP	MEF-Chop-ChIP-Seq	GSE35681	Homer	NTNATGCAAYMNNHTGMAAY	0.1	0.4326	10	0.0358	1083.4	0.0223	9.05353
C2	Early-down	TEAD	TEA	Fibroblast-PU.1-ChIP-Seq	Unpublished	Homer	YCWGGAATGY	0.1	0.4326	42	0.1505	5994.2	0.1232	8.29002
C2	Early-down	NF1:FOXA1	CTF,Forkhead	LNCAP-FOXA1-ChIP-Seq	GSE27824	Homer	WNTGTTTRYTTTGGCA	1	0.4424	5	0.0179	429.7	0.0088	10.2737
C2	Early-down	PU.1	ETS	ThioMac-PU.1-ChIP-Seq	GSE21512	Homer	AGAGGAAGTG	1	0.4448	39	0.1398	5540.5	0.1138	7.61317
C2	Early-down	Smad4	MAD	ESC-SMAD4-ChIP-Seq	GSE29422	Homer	VBSYGTCTGG	1	0.4448	121	0.4337	19228.7	0.3951	6.4299
C2	Early-down	Srebp2	bHLH	HepG2-Srebp2-ChIP-Seq	GSE31477	Homer	CGGTCACSCCAC	1	0.4479	12	0.043	1391.3	0.0286	8.76533
C2	Early-down	Unknown-ESC-element	?	mES-Nanog-ChIP-Seq	GSE11724	Homer	CACAGCAGGGGG	1	0.456	49	0.1756	7183.5	0.1476	7.69767
C2	Early-down	Chop	bZIP	MEF-Chop-ChIP-Seq	GSE35681	Homer	ATTGCATCAT	1	0.4692	13	0.0466	1555	0.0319	7.62649
C2	Early-down	c-Myc	bHLH	LNCAP-cMyc-ChIP-Seq	Unpublished	Homer	VCCACGTG	1	0.4903	38	0.1362	5456.4	0.1121	6.6135
C2	Early-down	Lhx3	Homeobox	Neuron-Lhx3-ChIP-Seq	GSE31456	Homer	ADBTAATTAR	1	0.4979	87	0.3118	13572.7	0.2789	5.12751
C2	Early-down	KLF3	Zf	MEF-Klf3-ChIP-Seq	GSE44748	Homer	NRGCCCCRCCCHBNN	1	0.4979	51	0.1828	7582.2	0.1558	5.50528
C2	Early-down	MYB	HTH	ERMYB-Myb-ChIPSeq	GSE22095	Homer	GGCVGTTR	1	0.5151	113	0.405	18038.4	0.3706	2.20058
C2	Early-down	Nkx2.2	Homeobox	NPC-Nkx2.2-ChIP-Seq	GSE61673	Homer	BTBRAGTGSN	1	0.5277	129	0.4624	20822	0.4278	6.13009
C2	Early-down	Oct6	POU,Homeobox	NPC-Pou3f1-ChIP-Seq	GSE35496	Homer	WATGCAAATGAG	1	0.5326	26	0.0932	3609.2	0.0742	7.88155
C2	Early-down	PU.1-IRF	ETS:IRF	Bcell-PU.1-ChIP-Seq	GSE21512	Homer	MGGAAGTGAAAC	1	0.5326	89	0.319	13998.7	0.2876	6.85196
C2	Early-down	SpiB	ETS	OCILY3-SPIB-ChIP-Seq	GSE56857	Homer	AAAGRGGAAGTG	1	0.5535	18	0.0645	2385.3	0.049	8.85312
C2	Early-down	Hoxa10	Homeobox	ChickenMSG-Hoxa10.Flag-ChIP-Seq	GSE86088	Homer	GGYAATGAAA	1	0.5535	33	0.1183	4756.7	0.0977	7.08661
C2	Early-down	NFAT	RHD	Jurkat-NFATC1-ChIP-Seq	Jolma_et_al.	Homer	ATTTTCCATT	1	0.5535	52	0.1864	7853.5	0.1614	6.82293
C2	Early-down	Tgif2	Homeobox	mES-Tgif2-ChIP-Seq	GSE55404	Homer	TGTCANYT	1	0.5535	178	0.638	29466.8	0.6054	5.21446
C2	Early-down	WT1	Zf	Kidney-WT1-ChIP-Seq	GSE90016	Homer	MCTCCCMCRCAB	1	0.5535	54	0.1935	8185.7	0.1682	7.71093
C2	Early-down	Rfx2	HTH	LoVo-RFX2-ChIP-Seq	GSE49402	Homer	GTTGCCATGGCAACM	1	0.5535	9	0.0323	1044.7	0.0215	8.14702
C2	Early-down	Atf4	bZIP	MEF-Atf4-ChIP-Seq	GSE35681	Homer	MTGATGCAAT	1	0.5535	16	0.0573	2093.2	0.043	6.54
C2	Early-down	Hnf6b	Homeobox	LNCaP-Hnf6b-ChIP-Seq	GSE106305	Homer	TATTGAYY	1	0.5535	45	0.1613	6730.5	0.1383	6.25467
C2	Early-down	ZNF416	Zf	HEK293-ZNF416.GFP-ChIP-Seq	GSE58341	Homer	WDNCTGGGCA	1	0.5535	102	0.3656	16297.6	0.3348	7.03014
C2	Early-down	Zfp809	Zf	ES-Zfp809-ChIP-Seq	GSE70799	Homer	GGGGCTYGKCTGGGA	1	0.5649	20	0.0717	2734.4	0.0562	9.01233
C2	Early-down	OCT:OCT-short	POU,Homeobox	NPC-OCT6-ChIP-Seq	GSE43916	Homer	ATGCATWATGCATRW	1	0.5743	34	0.1219	4979.4	0.1023	-3.93033
C2	Early-down	E2F	E2F	Hela-CellCycle-Expression	NA	Homer	TTSGCGCGAAAA	1	0.5877	6	0.0215	645.2	0.0133	8.4865
C2	Early-down	ZNF675	Zf	HEK293-ZNF675.GFP-ChIP-Seq	GSE58341	Homer	ARGAGGMCAAAATGW	1	0.5877	10	0.0358	1225.8	0.0252	8.91287
C2	Early-down	Bcl11a	Zf	HSPC-BCL11A-ChIP-Seq	GSE104676	Homer	TYTGACCASWRG	1	0.5877	50	0.1792	7626.5	0.1567	7.30715
C2	Early-down	Oct2	POU,Homeobox	Bcell-Oct2-ChIP-Seq	GSE21512	Homer	ATATGCAAAT	1	0.5877	17	0.0609	2297	0.0472	7.58112
C2	Early-down	RORa	NR	Liver-Rora-ChIP-Seq	GSE101115	Homer	AAWCTAGGTCARDNN	1	0.5906	10	0.0358	1234.2	0.0254	9.12099
C2	Early-down	Fox:Ebox	Forkhead,bHLH	Panc1-Foxa2-ChIP-Seq	GSE47459	Homer	NNNVCTGWGYAAACASN	1	0.5906	67	0.2401	10483.6	0.2154	7.01059
C2	Early-down	Pdx1	Homeobox	Islet-Pdx1-ChIP-Seq	SRA008281	Homer	YCATYAATCA	1	0.5906	52	0.1864	7985.3	0.1641	5.93226
C2	Early-down	STAT6	Stat	Macrophage-Stat6-ChIP-Seq	GSE38377	Homer	TTCCKNAGAA	1	0.5906	34	0.1219	5027.8	0.1033	6.48048
C2	Early-down	CEBP:AP1	bZIP	ThioMac-CEBPb-ChIP-Seq	GSE21512	Homer	DRTGTTGCAA	1	0.5915	42	0.1505	6351.7	0.1305	6.42862
C2	Early-down	NF1	CTF	LNCAP-NF1-ChIP-Seq	Unpublished	Homer	CYTGGCABNSTGCCAR	1	0.6173	30	0.1075	4420.7	0.0908	7.59834
C2	Early-down	Zfp57	Zf	H1-ZFP57.HA-ChIP-Seq	GSE115387	Homer	NANTGCSGCA	1	0.6267	34	0.1219	5086	0.1045	6.37386
C2	Early-down	Phox2b	Homeobox	CLBGA-PHOX2B-ChIP-Seq	GSE90683	Homer	TTAATTNAATTA	1	0.6467	10	0.0358	1280.8	0.0263	4.10044
C2	Early-down	ZNF382	Zf	HEK293-ZNF382.GFP-ChIP-Seq	GSE58341	Homer	GNCTGTASTRNTGBCTCHTT	1	0.6467	3	0.0108	270.4	0.0056	10.5743
C2	Early-down	Klf9	Zf	GBM-Klf9-ChIP-Seq	GSE62211	Homer	GCCACRCCCACY	1	0.6467	42	0.1505	6429.3	0.1321	7.93508
C2	Early-down	Smad2	MAD	ES-SMAD2-ChIP-Seq	GSE29422	Homer	CTGTCTGG	1	0.6467	114	0.4086	18641.8	0.383	6.10069
C2	Early-down	CRX	Homeobox	Retina-Crx-ChIP-Seq	GSE20012	Homer	GCTAATCC	1	0.6467	131	0.4695	21587.7	0.4435	4.85243
C2	Early-down	HNF6	Homeobox	Liver-Hnf6-ChIP-Seq	ERP000394	Homer	NTATYGATCH	1	0.6469	28	0.1004	4155	0.0854	4.57375
C2	Early-down	Cux2	Homeobox	Liver-Cux2-ChIP-Seq	GSE35985	Homer	HNRAATCAAT	1	0.6469	23	0.0824	3346.4	0.0688	6.35909
C2	Early-down	Duxbl	Homeobox	NIH3T3-Duxbl.HA-ChIP-Seq	GSE119782	Homer	TAAYCYAATCAA	1	0.6518	5	0.0179	556.4	0.0114	8.8731
C2	Early-down	CEBP	bZIP	ThioMac-CEBPb-ChIP-Seq	GSE21512	Homer	ATTGCGCAAC	1	0.6534	34	0.1219	5156.9	0.106	6.12841
C2	Early-down	Pitx1	Homeobox	Chicken-Pitx1-ChIP-Seq	GSE38910	Homer	TAATCCCN	1	0.6861	196	0.7025	33099.2	0.6801	4.69519
C2	Early-down	TRPS1	Zf	MCF7-TRPS1-ChIP-Seq	GSE107013	Homer	AGATAAGANN	1	0.6861	102	0.3656	16694.4	0.343	5.50203
C2	Early-down	CLOCK	bHLH	Liver-Clock-ChIP-Seq	GSE39860	Homer	GHCACGTG	1	0.6861	40	0.1434	6191.6	0.1272	6.34007
C2	Early-down	Maz	Zf	HepG2-Maz-ChIP-Seq	GSE31477	Homer	GGGGGGGG	1	0.7008	106	0.3799	17424.7	0.358	7.47877
C2	Early-down	Lhx1	Homeobox	EmbryoCarcinoma-Lhx1-ChIP-Seq	GSE70957	Homer	NNYTAATTAR	1	0.7073	57	0.2043	9080.4	0.1866	5.97818
C2	Early-down	FoxL2	Forkhead	Ovary-FoxL2-ChIP-Seq	GSE60858	Homer	WWTRTAAACAVG	1	0.7086	47	0.1685	7405	0.1521	6.23236
C2	Early-down	Tbx20	T-box	Heart-Tbx20-ChIP-Seq	GSE29636	Homer	GGTGYTGACAGS	1	0.7145	17	0.0609	2463.6	0.0506	8.53871
C2	Early-down	Hnf1	Homeobox	Liver-Foxa2-Chip-Seq	GSE25694	Homer	GGTTAAWCATTAA	1	0.7145	7	0.0251	889.9	0.0183	8.86614
C2	Early-down	GSC	Homeobox	FrogEmbryos-GSC-ChIP-Seq	DRA000576	Homer	RGGATTAR	1	0.7145	70	0.2509	11309.3	0.2324	6.27719
C2	Early-down	PAX6	Paired,Homeobox	Forebrain-Pax6-ChIP-Seq	GSE66961	Homer	NGTGTTCAVTSAAGCGKAAA	1	0.7145	7	0.0251	893.8	0.0184	8.86092
C2	Early-down	Meis1	Homeobox	MastCells-Meis1-ChIP-Seq	GSE48085	Homer	VGCTGWCAVB	1	0.7188	113	0.405	18709.4	0.3844	6.3078
C2	Early-down	E-box	bHLH	Promoter	NA	Homer	SSGGTCACGTGA	1	0.7274	7	0.0251	903.9	0.0186	8.81622
C2	Early-down	Nrf2	bZIP	Lymphoblast-Nrf2-ChIP-Seq	GSE37589	Homer	HTGCTGAGTCAT	1	0.7274	4	0.0143	453.4	0.0093	9.792
C2	Early-down	HINFP	Zf	K562-HINFP.eGFP-ChIP-Seq	Encode	Homer	TWVGGTCCGC	1	0.7274	29	0.1039	4460.8	0.0917	6.66582
C2	Early-down	EKLF	Zf	Erythrocyte-Klf1-ChIP-Seq	GSE20478	Homer	NWGGGTGTGGCY	1	0.7274	17	0.0609	2495.6	0.0513	9.25088
C2	Early-down	Bach1	bZIP	K562-Bach1-ChIP-Seq	GSE31477	Homer	AWWNTGCTGAGTCAT	1	0.7333	4	0.0143	460.1	0.0095	9.34972
C2	Early-down	MafA	bZIP	Islet-MafA-ChIP-Seq	GSE30298	Homer	TGCTGACTCA	1	0.7333	59	0.2115	9519	0.1956	6.97933
C2	Early-down	Barx1	Homeobox	Stomach-Barx1.3xFlag-ChIP-Seq	GSE69483	Homer	AAACMATTAN	1	0.7333	26	0.0932	3982.7	0.0818	6.18251
C2	Early-down	TFE3	bHLH	MEF-TFE3-ChIP-Seq	GSE75757	Homer	GTCACGTGACYV	1	0.7333	7	0.0251	918.9	0.0189	8.32268
C2	Early-down	DMRT1	DM	Testis-DMRT1-ChIP-Seq	GSE64892	Homer	TWGHWACAWTGTWDC	1	0.7333	14	0.0502	2028.4	0.0417	7.68035
C2	Early-down	HNF1b	Homeobox	PDAC-HNF1B-ChIP-Seq	GSE64557	Homer	GTTAATNATTAA	1	0.7333	7	0.0251	922.7	0.019	8.55189
C2	Early-down	STAT6	Stat	CD4-Stat6-ChIP-Seq	GSE22104	Homer	ABTTCYYRRGAA	1	0.7333	31	0.1111	4829.9	0.0992	7.32879
C2	Early-down	NFY	CCAAT	Promoter	NA	Homer	RGCCAATSRG	1	0.7333	57	0.2043	9209.2	0.1892	4.70551
C2	Early-down	Tcfcp2l1	CP2	mES-Tcfcp2l1-ChIP-Seq	GSE11431	Homer	NRAACCRGTTYRAACCRGYT	1	0.7333	13	0.0466	1876.8	0.0386	8.04087
C2	Early-down	GATA	Zf,IR4	iTreg-Gata3-ChIP-Seq	GSE20898	Homer	NAGATWNBNATCTNN	1	0.7356	5	0.0179	623.3	0.0128	9.53762
C2	Early-down	FOXK1	Forkhead	HEK293-FOXK1-ChIP-Seq	GSE51673	Homer	NVWTGTTTAC	1	0.7478	56	0.2007	9080.5	0.1866	6.33705
C2	Early-down	ZNF341	Zf	EBV-ZNF341-ChIP-Seq	GSE113194	Homer	GGAACAGCCG	1	0.7528	57	0.2043	9262.2	0.1903	7.22693
C2	Early-down	RFX	HTH	K562-RFX3-ChIP-Seq	SRA012198	Homer	CGGTTGCCATGGCAAC	1	0.7727	7	0.0251	953.4	0.0196	8.57081
C2	Early-down	Ronin	THAP	ES-Thap11-ChIP-Seq	GSE51522	Homer	RACTACAACTCCCAGVAKGC	1	0.7727	3	0.0108	339.3	0.007	9.95423
C2	Early-down	NFkB-p50,p52	RHD	Monocyte-p50-ChIP-Chip	Schreiber_et_al.	Homer	GGGGGAATCCCC	1	0.7743	9	0.0323	1276.6	0.0262	8.67192
C2	Early-down	TEAD1	TEAD	HepG2-TEAD1-ChIP-Seq	Encode	Homer	CYRCATTCCA	1	0.7743	56	0.2007	9139.5	0.1878	4.44236
C2	Early-down	CArG	MADS	PUER-Srf-ChIP-Seq	Sullivan_et_al.	Homer	CCATATATGGNM	1	0.7743	18	0.0645	2745.9	0.0564	6.91146
C2	Early-down	Hoxd10	Homeobox	ChickenMSG-Hoxd10.Flag-ChIP-Seq	GSE86088	Homer	GGCMATGAAA	1	0.7743	61	0.2186	9994.8	0.2054	6.61875
C2	Early-down	ZNF322	Zf	HEK293-ZNF322.GFP-ChIP-Seq	GSE58341	Homer	GAGCCTGGTACTGWGCCTGR	1	0.7743	24	0.086	3741.8	0.0769	8.91909
C2	Early-down	LEF1	HMG	H1-LEF1-ChIP-Seq	GSE64758	Homer	CCTTTGATST	1	0.7743	41	0.147	6602.3	0.1356	7.55657
C2	Early-down	ZNF165	Zf	WHIM12-ZNF165-ChIP-Seq	GSE65937	Homer	AAGGKGRCGCAGGCA	1	0.7843	12	0.043	1782.7	0.0366	9.83527
C2	Early-down	ZNF519	Zf	HEK293-ZNF519.GFP-ChIP-Seq	GSE58341	Homer	GAGSCCGAGC	1	0.7843	22	0.0789	3437.3	0.0706	7.96525
C2	Early-down	Foxa3	Forkhead	Liver-Foxa3-ChIP-Seq	GSE77670	Homer	BSNTGTTTACWYWGN	1	0.7843	18	0.0645	2776.6	0.057	8.40103
C2	Early-down	Gfi1b	Zf	HPC7-Gfi1b-ChIP-Seq	GSE22178	Homer	MAATCACTGC	1	0.7843	42	0.1505	6815.7	0.14	6.76835
C2	Early-down	GRE	NR,IR3	RAW264.7-GRE-ChIP-Seq	Unpublished	Homer	VAGRACAKWCTGTYC	1	0.7843	16	0.0573	2448.3	0.0503	7.80986
C2	Early-down	RUNX	Runt	HPC7-Runx1-ChIP-Seq	GSE22178	Homer	SAAACCACAG	1	0.7843	47	0.1685	7666.9	0.1575	6.62587
C2	Early-down	NFAT:AP1	RHD,bZIP	Jurkat-NFATC1-ChIP-Seq	Jolma_et_al.	Homer	SARTGGAAAAWRTGAGTCAB	1	0.7843	10	0.0358	1468	0.0302	8.95086
C2	Early-down	Foxh1	Forkhead	hESC-FOXH1-ChIP-Seq	GSE29422	Homer	NNTGTGGATTSS	1	0.7843	33	0.1183	5303.3	0.109	7.15123
C2	Early-down	LRF	Zf	Erythroblasts-ZBTB7A-ChIP-Seq	GSE74977	Homer	AAGACCCYYN	1	0.7843	106	0.3799	17817.9	0.3661	6.78566
C2	Early-down	Zic	Zf	Cerebellum-ZIC1.2-ChIP-Seq	GSE60731	Homer	CCTGCTGAGH	1	0.7889	64	0.2294	10609.8	0.218	7.26844
C2	Early-down	bZIP:IRF	bZIP,IRF	Th17-BatF-ChIP-Seq	GSE39756	Homer	NAGTTTCABTHTGACTNW	1	0.7889	27	0.0968	4314	0.0886	8.08507
C2	Early-down	RUNX-AML	Runt	CD4+-PolII-ChIP-Seq	Barski_et_al.	Homer	GCTGTGGTTW	1	0.7889	46	0.1649	7540.3	0.1549	7.38572
C2	Early-down	ERE	NR,IR3	MCF7-ERa-ChIP-Seq	Unpublished	Homer	VAGGTCACNSTGACC	1	0.7889	20	0.0717	3143.1	0.0646	7.66658
C2	Early-down	Foxo3	Forkhead	U2OS-Foxo3-ChIP-Seq	E-MTAB-2701	Homer	DGTAAACA	1	0.7889	39	0.1398	6358.3	0.1306	4.67304
C2	Early-down	GLIS3	Zf	Thyroid-Glis3.GFP-ChIP-Seq	GSE103297	Homer	CTCCCTGGGAGGCCN	1	0.7899	104	0.3728	17537.8	0.3603	6.23448
C2	Early-down	Hoxa13	Homeobox	ChickenMSG-Hoxa13.Flag-ChIP-Seq	GSE86088	Homer	CYHATAAAAN	1	0.7899	119	0.4265	20139.7	0.4138	5.79616
C2	Early-down	DMRT6	DM	Testis-DMRT6-ChIP-Seq	GSE60440	Homer	YDGHTACAWTGTADC	1	0.7899	12	0.043	1823.8	0.0375	7.81831
C2	Early-down	Tcf7	HMG	GM12878-TCF7-ChIP-Seq	Encode	Homer	CTTTGATGTGSB	1	0.7936	21	0.0753	3336.2	0.0685	8.21097
C2	Early-down	IRF:BATF	IRF:bZIP	pDC-Irf8-ChIP-Seq	GSE66899	Homer	CTTTCANTATGACTV	1	0.7936	7	0.0251	1013.9	0.0208	9.61967
C2	Early-down	E2F3	E2F	MEF-E2F3-ChIP-Seq	GSE71376	Homer	BTKGGCGGGAAA	1	0.7936	48	0.172	7928.9	0.1629	6.82745
C2	Early-down	MafB	bZIP	BMM-Mafb-ChIP-Seq	GSE75722	Homer	WNTGCTGASTCAGCANWTTY	1	0.7936	29	0.1039	4693.7	0.0964	6.39362
C2	Early-down	Foxf1	Forkhead	Lung-Foxf1-ChIP-Seq	GSE77951	Homer	WWATRTAAACAN	1	0.7936	49	0.1756	8105.5	0.1665	6.34862
C2	Early-down	FOXA1:AR	Forkhead,NR	LNCAP-AR-ChIP-Seq	GSE27824	Homer	AGTAAACAAAAAAGAACAND	1	0.7936	6	0.0215	856.5	0.0176	10.6039
C2	Early-down	Hoxa9	Homeobox	ChickenMSG-Hoxa9.Flag-ChIP-Seq	GSE86088	Homer	RGCAATNAAA	1	0.8032	135	0.4839	23005.3	0.4727	5.52419
C2	Early-down	PGR	NR	EndoStromal-PGR-ChIP-Seq	GSE69539	Homer	AAGAACATWHTGTTC	1	0.8032	14	0.0502	2190.4	0.045	7.11747
C2	Early-down	Otx2	Homeobox	EpiLC-Otx2-ChIP-Seq	GSE56098	Homer	NYTAATCCYB	1	0.8032	49	0.1756	8145.6	0.1674	6.67091
C2	Early-down	E2F7	E2F	Hela-E2F7-ChIP-Seq	GSE32673	Homer	VDTTTCCCGCCA	1	0.8034	10	0.0358	1532.1	0.0315	8.69074
C2	Early-down	NF-E2	bZIP	K562-NFE2-ChIP-Seq	GSE31477	Homer	GATGACTCAGCA	1	0.8089	4	0.0143	552	0.0113	9.74838
C2	Early-down	KLF14	Zf	HEK293-KLF14.GFP-ChIP-Seq	GSE58341	Homer	RGKGGGCGKGGC	1	0.8238	127	0.4552	21699.1	0.4458	6.33053
C2	Early-down	RUNX1	Runt	Jurkat-RUNX1-ChIP-Seq	GSE29180	Homer	AAACCACARM	1	0.8359	65	0.233	10979.8	0.2256	6.64863
C2	Early-down	HOXA1	Homeobox	mES-Hoxa1-ChIP-Seq	SRP084292	Homer	TGATKGATGR	1	0.8359	14	0.0502	2237.5	0.046	8.01907
C2	Early-down	Hoxd13	Homeobox	ChickenMSG-Hoxd13.Flag-ChIP-Seq	GSE86088	Homer	NCYAATAAAA	1	0.8359	78	0.2796	13237	0.272	6.01605
C2	Early-down	RORg	NR	Liver-Rorc-ChIP-Seq	GSE101115	Homer	WAABTAGGTCAV	1	0.8359	5	0.0179	732.6	0.0151	9.09674
C2	Early-down	Tbox:Smad	T-box,MAD	ESCd5-Smad2_3-ChIP-Seq	GSE29422	Homer	AGGTGHCAGACA	1	0.8359	13	0.0466	2077.6	0.0427	8.77668
C2	Early-down	HLF	bZIP	HSC-HLF.Flag-ChIP-Seq	GSE69817	Homer	RTTATGYAAB	1	0.8518	37	0.1326	6202.6	0.1274	6.20931
C2	Early-down	Bapx1	Homeobox	VertebralCol-Bapx1-ChIP-Seq	GSE36672	Homer	TTRAGTGSYK	1	0.8627	128	0.4588	21994.1	0.4519	6.03763
C2	Early-down	ZFX	Zf	mES-Zfx-ChIP-Seq	GSE11431	Homer	AGGCCTRG	1	0.8627	87	0.3118	14870.9	0.3055	6.24845
C2	Early-down	ELF3	ETS	PDAC-ELF3-ChIP-Seq	GSE64557	Homer	ANCAGGAAGT	1	0.8637	46	0.1649	7784.9	0.1599	7.58608
C2	Early-down	Dlx3	Homeobox	Kerainocytes-Dlx3-ChIP-Seq	GSE89884	Homer	NDGTAATTAC	1	0.8637	30	0.1075	5027.4	0.1033	5.57497
C2	Early-down	PR	NR	T47D-PR-ChIP-Seq	GSE31130	Homer	VAGRACAKNCTGTBC	1	0.885	132	0.4731	22761.4	0.4677	5.62734
C2	Early-down	Pit1+1bp	Homeobox	GCrat-Pit1-ChIP-Seq	GSE58009	Homer	ATGCATAATTCA	1	0.8919	14	0.0502	2313	0.0475	7.33824
C2	Early-down	TEAD3	TEA	HepG2-TEAD3-ChIP-Seq	Encode	Homer	TRCATTCCAG	1	0.8919	63	0.2258	10787.7	0.2216	5.85698
C2	Early-down	LXRE	NR,DR4	RAW-LXRb.biotin-ChIP-Seq	GSE21512	Homer	RGGTTACTANAGGTCA	1	0.8964	3	0.0108	440.5	0.0091	9.09992
C2	Early-down	VDR	NR,DR3	GM10855-VDR+vitD-ChIP-Seq	GSE22484	Homer	ARAGGTCANWGAGTTCANNN	1	0.8992	13	0.0466	2156.7	0.0443	8.33047
C2	Early-down	bHLHE41	bHLH	proB-Bhlhe41-ChIP-Seq	GSE93764	Homer	KCACGTGMCN	1	0.906	76	0.2724	13092.5	0.269	5.31838
C2	Early-down	FXR	NR,IR1	Liver-FXR-ChIP-Seq	Chong_et_al.	Homer	AGGTCANTGACCTB	1	0.9064	25	0.0896	4244.2	0.0872	6.87316
C2	Early-down	Brn2	POU,Homeobox	NPC-Brn2-ChIP-Seq	GSE35496	Homer	ATGAATATTC	1	0.9179	4	0.0143	625.5	0.0129	9.45437
C2	Early-down	Six2	Homeobox	NephronProgenitor-Six2-ChIP-Seq	GSE39837	Homer	GWAAYHTGAKMC	1	0.9179	53	0.19	9130.8	0.1876	6.53718
C2	Early-down	Brn1	POU,Homeobox	NPC-Brn1-ChIP-Seq	GSE35496	Homer	TATGCWAATBAV	1	0.9194	16	0.0573	2708.7	0.0557	8.42113
C2	Early-down	Stat3	Stat	mES-Stat3-ChIP-Seq	GSE11431	Homer	CTTCCGGGAA	1	0.9314	33	0.1183	5681.1	0.1167	7.06388
C2	Early-down	Lhx2	Homeobox	HFSC-Lhx2-ChIP-Seq	GSE48068	Homer	TAATTAGN	1	0.9354	51	0.1828	8827.8	0.1814	6.1087
C2	Early-down	Sp1	Zf	Promoter	NA	Homer	GGCCCCGCCCCC	1	0.939	29	0.1039	5003.9	0.1028	8.68507
C2	Early-down	RUNX2	Runt	PCa-RUNX2-ChIP-Seq	GSE33889	Homer	NWAACCACADNN	1	0.939	52	0.1864	9013.2	0.1852	7.6722
C2	Early-down	Bcl6	Zf	Liver-Bcl6-ChIP-Seq	GSE31578	Homer	NNNCTTTCCAGGAAA	1	0.939	83	0.2975	14430.1	0.2965	6.52264
C2	Early-down	STAT4	Stat	CD4-Stat4-ChIP-Seq	GSE22104	Homer	NYTTCCWGGAAR	1	0.9465	53	0.19	9217.2	0.1894	5.22025
C2	Early-down	Gli2	Zf	GM2-Gli2-ChIP-Chip	GSE112702	Homer	YSTGGGTGGTCT	1	0.9521	19	0.0681	3288.6	0.0676	8.36738
C2	Early-down	ISRE	IRF	ThioMac-LPS-Expression	GSE23622	Homer	AGTTTCASTTTC	1	0.9521	3	0.0108	480.1	0.0099	10.5125
C2	Early-down	EWS:ERG-fusion	ETS	CADO_ES1-EWS:ERG-ChIP-Seq	SRA014231	Homer	ATTTCCTGTN	1	0.9521	41	0.147	7152.5	0.147	7.33879
C2	Early-down	NFkB-p65-Rel	RHD	ThioMac-LPS-Expression	GSE23622	Homer	GGAAATTCCC	1	0.9524	3	0.0108	486.2	0.01	9.2299
C2	Early-down	Gata4	Zf	Heart-Gata4-ChIP-Seq	GSE35151	Homer	NBWGATAAGR	1	0.9524	49	0.1756	8561.2	0.1759	6.51598
C2	Early-down	AP-2gamma	AP2	MCF7-TFAP2C-ChIP-Seq	GSE21234	Homer	SCCTSAGGSCAW	1	0.9524	76	0.2724	13285.9	0.273	6.34979
C2	Early-down	FOXA1	Forkhead	MCF7-FOXA1-ChIP-Seq	GSE26831	Homer	WAAGTAAACA	1	0.9524	52	0.1864	9093.1	0.1868	6.56811
C2	Early-down	RAR:RXR	NR,DR5	ES-RAR-ChIP-Seq	GSE56893	Homer	RGGTCADNNAGAGGTCAV	1	0.9524	2	0.0072	313.8	0.0064	9.38952
C2	Early-down	RAR:RXR	NR,DR5	ES-RAR-ChIP-Seq	GSE56893	Homer	RGGTCADNNAGAGGTCAV	1	0.9524	2	0.0072	313.8	0.0064	11.1934
C2	Early-down	Foxa2	Forkhead	Liver-Foxa2-ChIP-Seq	GSE25694	Homer	CYTGTTTACWYW	1	0.9524	41	0.147	7183.5	0.1476	6.53541
C2	Early-down	E2F6	E2F	Hela-E2F6-ChIP-Seq	GSE31477	Homer	GGCGGGAARN	1	0.9524	39	0.1398	6838.8	0.1405	7.14891
C2	Early-down	GATA3	Zf,DR4	iTreg-Gata3-ChIP-Seq	GSE20898	Homer	AGATGKDGAGATAAG	1	0.9524	4	0.0143	676	0.0139	8.17976
C2	Early-down	IRF4	IRF	GM12878-IRF4-ChIP-Seq	GSE32465	Homer	ACTGAAACCA	1	0.9525	23	0.0824	4041.2	0.083	7.36904
C2	Early-down	FOXM1	Forkhead	MCF7-FOXM1-ChIP-Seq	GSE72977	Homer	TRTTTACTTW	1	0.9624	56	0.2007	9856.1	0.2025	7.164
C2	Early-down	TCFL2	HMG	K562-TCF7L2-ChIP-Seq	GSE29196	Homer	ACWTCAAAGG	1	0.9624	5	0.0179	867	0.0178	7.7909
C2	Early-down	Nkx6.1	Homeobox	Islet-Nkx6.1-ChIP-Seq	GSE40975	Homer	GKTAATGR	1	0.9635	113	0.405	19841.9	0.4077	4.63307
C2	Early-down	NRF1	NRF	MCF7-NRF1-ChIP-Seq	Unpublished	Homer	CTGCGCATGCGC	1	0.9769	15	0.0538	2669.6	0.0548	8.59578
C2	Early-down	Tbx5	T-box	HL1-Tbx5.biotin-ChIP-Seq	GSE21529	Homer	AGGTGTCA	1	0.9769	172	0.6165	30157.9	0.6196	5.41231
C2	Early-down	Tlx?	NR	NPC-H3K4me1-ChIP-Seq	GSE16256	Homer	CTGGCAGSCTGCCA	1	0.9769	29	0.1039	5158.4	0.106	7.86509
C2	Early-down	GFY	?	Promoter	NA	Homer	ACTACAATTCCC	1	0.9769	4	0.0143	702.3	0.0144	9.37784
C2	Early-down	Elf4	ETS	BMDM-Elf4-ChIP-Seq	GSE88699	Homer	ACTTCCKGKT	1	0.979	67	0.2401	11863.1	0.2437	6.93529
C2	Early-down	Rfx1	HTH	NPC-H3K4me1-ChIP-Seq	GSE16256	Homer	KGTTGCCATGGCAA	1	0.9793	13	0.0466	2333.6	0.0479	8.05843
C2	Early-down	ZNF711	Zf	SHSY5Y-ZNF711-ChIP-Seq	GSE20673	Homer	AGGCCTAG	1	0.9832	118	0.4229	20813.8	0.4276	6.10193
C2	Early-down	HOXA2	Homeobox	mES-Hoxa2-ChIP-Seq	Donaldson_et_al.	Homer	GYCATCMATCAT	1	0.9949	5	0.0179	906.6	0.0186	9.38885
C2	Early-down	Usf2	bHLH	C2C12-Usf2-ChIP-Seq	GSE36030	Homer	GTCACGTGGT	1	1	18	0.0645	3262.2	0.067	7.54255
C2	Early-down	HRE	HSF	Striatum-HSF1-ChIP-Seq	GSE38000	Homer	TTCTAGAABNTTCTA	1	1	12	0.043	2185.5	0.0449	8.2342
C2	Early-down	ZNF467	Zf	HEK293-ZNF467.GFP-ChIP-Seq	GSE58341	Homer	TGGGGAAGGGCM	1	1	64	0.2294	11411.8	0.2345	7.76178
C2	Early-down	GFY-Staf	?,Zf	Promoter	NA	Homer	RACTACAATTCCCAGAAKGC	1	1	4	0.0143	731.3	0.015	4.60953
C2	Early-down	E2F4	E2F	K562-E2F4-ChIP-Seq	GSE31477	Homer	GGCGGGAAAH	1	1	31	0.1111	5588.1	0.1148	6.58096
C2	Early-down	Nr5a2	NR	Pancreas-LRH1-ChIP-Seq	GSE34295	Homer	BTCAAGGTCA	1	1	48	0.172	8611.5	0.1769	7.02113
C2	Early-down	EBNA1	EBV-virus	Raji-EBNA1-ChIP-Seq	GSE30709	Homer	GGYAGCAYDTGCTDCCCNNN	1	1	1	0.0036	165.2	0.0034	11.187
C2	Early-down	ZNF692	Zf	HEK293-ZNF692.GFP-ChIP-Seq	GSE58341	Homer	GTGGGCCCCA	1	1	9	0.0323	1660.1	0.0341	8.1892
C2	Early-down	ELF5	ETS	T47D-ELF5-ChIP-Seq	GSE30407	Homer	ACVAGGAAGT	1	1	45	0.1613	8099.3	0.1664	6.8543
C2	Early-down	RORgt	NR	EL4-RORgt.Flag-ChIP-Seq	GSE56019	Homer	AAYTAGGTCA	1	1	6	0.0215	1117.8	0.023	8.64571
C2	Early-down	RORgt	NR	EL4-RORgt.Flag-ChIP-Seq	GSE56019	Homer	AAYTAGGTCA	1	1	6	0.0215	1117.8	0.023	8.64571
C2	Early-down	RORgt	NR	EL4-RORgt.Flag-ChIP-Seq	GSE56019	Homer	AAYTAGGTCA	1	1	6	0.0215	1117.8	0.023	8.64571
C2	Early-down	RORgt	NR	EL4-RORgt.Flag-ChIP-Seq	GSE56019	Homer	AAYTAGGTCA	1	1	6	0.0215	1117.8	0.023	8.64571
C2	Early-down	Gata6	Zf	HUG1N-GATA6-ChIP-Seq	GSE51936	Homer	YCTTATCTBN	1	1	42	0.1505	7586.5	0.1559	6.28786
C2	Early-down	ZNF189	Zf	HEK293-ZNF189.GFP-ChIP-Seq	GSE58341	Homer	TGGAACAGMA	1	1	54	0.1935	9711.4	0.1995	7.11928
C2	Early-down	p53	p53	mES-cMyc-ChIP-Seq	GSE11431	Homer	ACATGCCCGGGCAT	1	1	1	0.0036	170.2	0.0035	11.0481
C2	Early-down	Gata2	Zf	K562-GATA2-ChIP-Seq	GSE18829	Homer	BBCTTATCTS	1	1	31	0.1111	5635.5	0.1158	6.67483
C2	Early-down	Pknox1	Homeobox	ES-Prep1-ChIP-Seq	GSE63282	Homer	SCTGTCAVTCAV	1	1	15	0.0538	2777.6	0.0571	8.29962
C2	Early-down	Hoxd12	Homeobox	ChickenMSG-Hoxd12.Flag-ChIP-Seq	GSE86088	Homer	HDGYAATGAAAN	1	1	84	0.3011	15025.3	0.3087	6.23557
C2	Early-down	ZNF317	Zf	HEK293-ZNF317.GFP-ChIP-Seq	GSE58341	Homer	GTCWGCTGTYYCTCT	1	1	5	0.0179	948	0.0195	9.52519
C2	Early-down	Twist	bHLH	HMLE-TWIST1-ChIP-Seq	Chang_et_al	Homer	VCAKCTGGNNNCCAGMTGBN	1	1	8	0.0287	1505.8	0.0309	9.10017
C2	Early-down	HIF2a	bHLH	785_O-HIF2a-ChIP-Seq	GSE34871	Homer	GCACGTACCC	1	1	20	0.0717	3696.7	0.076	6.74272
C2	Early-down	TEAD2	TEA	Py2T-Tead2-ChIP-Seq	GSE55709	Homer	CCWGGAATGY	1	1	28	0.1004	5138.5	0.1056	7.34798
C2	Early-down	FOXA1	Forkhead	LNCAP-FOXA1-ChIP-Seq	GSE27824	Homer	WAAGTAAACA	1	1	61	0.2186	11005.9	0.2261	6.33753
C2	Early-down	Arnt:Ahr	bHLH	MCF7-Arnt-ChIP-Seq	Lo_et_al.	Homer	TBGCACGCAA	1	1	43	0.1541	7817.9	0.1606	6.1015
C2	Early-down	Nkx2.5	Homeobox	HL1-Nkx2.5.biotin-ChIP-Seq	GSE21529	Homer	RRSCACTYAA	1	1	128	0.4588	22782.3	0.4681	5.89817
C2	Early-down	GABPA	ETS	Jurkat-GABPa-ChIP-Seq	GSE17954	Homer	RACCGGAAGT	1	1	59	0.2115	10686.5	0.2196	6.58177
C2	Early-down	Tbx6	T-box	ESC-Tbx6-ChIP-Seq	GSE93524	Homer	DAGGTGTBAA	1	1	59	0.2115	10687.8	0.2196	6.34926
C2	Early-down	EBF2	EBF	BrownAdipose-EBF2-ChIP-Seq	GSE97114	Homer	NABTCCCWDGGGAVH	1	1	57	0.2043	10338.6	0.2124	6.63664
C2	Early-down	ETS:E-box	ETS,bHLH	HPC7-Scl-ChIP-Seq	GSE22178	Homer	AGGAARCAGCTG	1	1	5	0.0179	969.3	0.0199	10.0153
C2	Early-down	E2F1	E2F	Hela-E2F1-ChIP-Seq	GSE22478	Homer	CWGGCGGGAA	1	1	17	0.0609	3185	0.0654	7.5313
C2	Early-down	EHF	ETS	LoVo-EHF-ChIP-Seq	GSE49402	Homer	AVCAGGAAGT	1	1	78	0.2796	14052.5	0.2887	7.21279
C2	Early-down	Egr2	Zf	Thymocytes-Egr2-ChIP-Seq	GSE34254	Homer	NGCGTGGGCGGR	1	1	15	0.0538	2825.7	0.0581	9.1687
C2	Early-down	ZNF7	Zf	HepG2-ZNF7.Flag-ChIP-Seq	Encode	Homer	CTGCCWVCTTTTRTA	1	1	29	0.1039	5367	0.1103	6.31438
C2	Early-down	Nkx3.1	Homeobox	LNCaP-Nkx3.1-ChIP-Seq	GSE28264	Homer	AAGCACTTAA	1	1	130	0.4659	23196.4	0.4766	5.53405
C2	Early-down	NFE2L2	bZIP	HepG2-NFE2L2-ChIP-Seq	Encode	Homer	AWWWTGCTGAGTCAT	1	1	3	0.0108	593	0.0122	9.88653
C2	Early-down	Hoxa11	Homeobox	ChickenMSG-Hoxa11.Flag-ChIP-Seq	GSE86088	Homer	TTTTATGGCM	1	1	107	0.3835	19186.4	0.3942	5.40132
C2	Early-down	Hand2	bHLH	Mesoderm-Hand2-ChIP-Seq	GSE61475	Homer	TGACANARRCCAGRC	1	1	29	0.1039	5382.6	0.1106	8.40959
C2	Early-down	KLF5	Zf	LoVo-KLF5-ChIP-Seq	GSE49402	Homer	DGGGYGKGGC	1	1	95	0.3405	17089.3	0.3511	6.67009
C2	Early-down	CTCF-SatelliteElement	Zf?	CD4+-CTCF-ChIP-Seq	Barski_et_al.	Homer	TGCAGTTCCMVNWRTGGCCA	1	1	1	0.0036	191.9	0.0039	11.1597
C2	Early-down	ZNF264	Zf	HEK293-ZNF264.GFP-ChIP-Seq	GSE58341	Homer	RGGGCACTAACY	1	1	42	0.1505	7717.3	0.1586	6.82124
C2	Early-down	X-box	HTH	NPC-H3K4me1-ChIP-Seq	GSE16256	Homer	GGTTGCCATGGCAA	1	1	6	0.0215	1177.1	0.0242	9.02111
C2	Early-down	PBX2	Homeobox	K562-PBX2-ChIP-Seq	Encode	Homer	RTGATTKATRGN	1	1	38	0.1362	7035.6	0.1446	6.66559
C2	Early-down	IRF3	IRF	BMDM-Irf3-ChIP-Seq	GSE67343	Homer	AGTTTCAKTTTC	1	1	15	0.0538	2882.1	0.0592	8.90888
C2	Early-down	ETS1	ETS	Jurkat-ETS1-ChIP-Seq	GSE17954	Homer	ACAGGAAGTG	1	1	67	0.2401	12232.7	0.2513	6.52537
C2	Early-down	GATA	Zf,IR3	iTreg-Gata3-ChIP-Seq	GSE20898	Homer	NNNNNBAGATAWYATCTVHN	1	1	6	0.0215	1204.8	0.0248	8.21231
C2	Early-down	GFX	?	Promoter	NA	Homer	ATTCTCGCGAGA	1	1	1	0.0036	205.1	0.0042	9.30792
C2	Early-down	ZNF415	Zf	HEK293-ZNF415.GFP-ChIP-Seq	GSE58341	Homer	GRTGMTRGAGCC	1	1	38	0.1362	7076.4	0.1454	6.9449
C2	Early-down	PRDM1	Zf	Hela-PRDM1-ChIP-Seq	GSE31477	Homer	ACTTTCACTTTC	1	1	29	0.1039	5464.9	0.1123	7.91277
C2	Early-down	Pax8	Paired,Homeobox	Thyroid-Pax8-ChIP-Seq	GSE26938	Homer	GTCATGCHTGRCTGS	1	1	22	0.0789	4205.5	0.0864	8.21097
C2	Early-down	Pbx3	Homeobox	GM12878-PBX3-ChIP-Seq	GSE32465	Homer	SCTGTCAMTCAN	1	1	15	0.0538	2918.6	0.06	8.24848
C2	Early-down	CUX1	Homeobox	K562-CUX1-ChIP-Seq	GSE92882	Homer	TATCGATNAN	1	1	27	0.0968	5125.2	0.1053	6.16664
C2	Early-down	Six4	Homeobox	MCF7-SIX4-ChIP-Seq	Encode	Homer	TGWAAYCTGABACCB	1	1	2	0.0072	431.5	0.0089	9.91365
C2	Early-down	PRDM10	Zf	HEK293-PRDM10.eGFP-ChIP-Seq	Encode	Homer	TGGTACATTCCA	1	1	36	0.129	6763.7	0.139	7.35354
C2	Early-down	TEAD4	TEA	Tropoblast-Tead4-ChIP-Seq	GSE37350	Homer	CCWGGAATGY	1	1	45	0.1613	8385.9	0.1723	7.17274
C2	Early-down	GRE	NR,IR3	A549-GR-ChIP-Seq	GSE32465	Homer	NRGVACABNVTGTYCY	1	1	7	0.0251	1433.3	0.0294	7.9144
C2	Early-down	Pax7	Paired,Homeobox	Myoblast-Pax7-ChIP-Seq	GSE25064	Homer	TAATCAATTA	1	1	3	0.0108	645.6	0.0133	8.51472
C2	Early-down	SF1	NR	H295R-Nr5a1-ChIP-Seq	GSE44220	Homer	CAAGGHCANV	1	1	31	0.1111	5879.4	0.1208	6.51408
C2	Early-down	Nr5a2	NR	mES-Nr5a2-ChIP-Seq	GSE19019	Homer	BTCAAGGTCA	1	1	35	0.1254	6612.7	0.1359	7.61376
C2	Early-down	PRDM15	Zf	ESC-Prdm15-ChIP-Seq	GSE73694	Homer	YCCDNTCCAGGTTTT	1	1	62	0.2222	11474.2	0.2357	6.4143
C2	Early-down	Fli1	ETS	CD8-FLI-ChIP-Seq	GSE20898	Homer	NRYTTCCGGH	1	1	71	0.2545	13081.5	0.2688	5.89729
C2	Early-down	AP-2alpha	AP2	Hela-AP2alpha-ChIP-Seq	GSE31477	Homer	ATGCCCTGAGGC	1	1	55	0.1971	10283.7	0.2113	6.80067
C2	Early-down	HOXB13	Homeobox	ProstateTumor-HOXB13-ChIP-Seq	GSE56288	Homer	TTTTATKRGG	1	1	48	0.172	9028	0.1855	4.26957
C2	Early-down	KLF10	Zf	HEK293-KLF10.GFP-ChIP-Seq	GSE58341	Homer	GGGGGTGTGTCC	1	1	53	0.19	9961.8	0.2047	6.71966
C2	Early-down	ZNF652	NA	HepG2-ZNF652.Flag-ChIP-Seq	Encode	Homer	TTAACCCTTTVNKKN	1	1	10	0.0358	2076.6	0.0427	7.87742
C2	Early-down	FOXP1	Forkhead	H9-FOXP1-ChIP-Seq	GSE31006	Homer	NYYTGTTTACHN	1	1	19	0.0681	3798	0.078	7.72718
C2	Early-down	FoxD3	forkhead	ZebrafishEmbryo-Foxd3.biotin-ChIP-seq	GSE106676	Homer	TGTTTAYTTAGC	1	1	44	0.1577	8386.6	0.1723	7.33682
C2	Early-down	Etv2	ETS	ES-ER71-ChIP-Seq	GSE59402	Homer	NNAYTTCCTGHN	1	1	56	0.2007	10559.3	0.217	7.21376
C2	Early-down	Nanog	Homeobox	mES-Nanog-ChIP-Seq	GSE11724	Homer	RGCCATTAAC	1	1	188	0.6738	33687.8	0.6921	4.45706
C2	Early-down	Stat3+il21	Stat	CD4-Stat3-ChIP-Seq	GSE19198	Homer	SVYTTCCNGGAARB	1	1	40	0.1434	7679.1	0.1578	6.74705
C2	Early-down	HRE	HSF	HepG2-HSF1-ChIP-Seq	GSE31477	Homer	BSTTCTRGAABVTTCYAGAA	1	1	8	0.0287	1715	0.0352	8.44025
C2	Early-down	GATA3	Zf	iTreg-Gata3-ChIP-Seq	GSE20898	Homer	AGATAASR	1	1	67	0.2401	12552.6	0.2579	5.93828
C2	Early-down	ZSCAN22	Zf	HEK293-ZSCAN22.GFP-ChIP-Seq	GSE58341	Homer	SMCAGTCWGAKGGAGGAGGC	1	1	4	0.0143	921.5	0.0189	10.1568
C2	Early-down	PRDM9	Zf	Testis-DMC1-ChIP-Seq	GSE35498	Homer	ADGGYAGYAGCATCT	1	1	26	0.0932	5147.1	0.1058	8.02355
C2	Early-down	Cdx2	Homeobox	mES-Cdx2-ChIP-Seq	GSE14586	Homer	GYMATAAAAH	1	1	29	0.1039	5727.2	0.1177	6.98658
C2	Early-down	Ets1-distal	ETS	CD4+-PolII-ChIP-Seq	Barski_et_al.	Homer	MACAGGAAGT	1	1	16	0.0573	3298	0.0678	8.63796
C2	Early-down	ETS	ETS	Promoter	NA	Homer	AACCGGAAGT	1	1	21	0.0753	4254.9	0.0874	7.14795
C2	Early-down	Max	bHLH	K562-Max-ChIP-Seq	GSE31477	Homer	RCCACGTGGYYN	1	1	42	0.1505	8154.3	0.1675	6.60803
C2	Early-down	NPAS	bHLH	Liver-NPAS-ChIP-Seq	GSE39860	Homer	NVCACGTG	1	1	92	0.3297	17138	0.3521	5.41316
C2	Early-down	EBF1	EBF	Near-E2A-ChIP-Seq	GSE21512	Homer	GTCCCCWGGGGA	1	1	65	0.233	12329	0.2533	6.75203
C2	Early-down	ZNF136	Zf	HEK293-ZNF136.GFP-ChIP-Seq	GSE58341	Homer	YTKGATAHAGTATTCTWGGTNGGCA	1	1	3	0.0108	755.2	0.0155	9.0964
C2	Early-down	OCT4-SOX2-TCF-NANOG	POU,Homeobox,HMG	mES-Oct4-ChIP-Seq	GSE11431	Homer	ATTTGCATAACAATG	1	1	6	0.0215	1391	0.0286	8.75142
C2	Early-down	FOXK2	Forkhead	U2OS-FOXK2-ChIP-Seq	E-MTAB-2204	Homer	SCHTGTTTACAT	1	1	28	0.1004	5629.3	0.1157	7.29725
C2	Early-down	Hoxd11	Homeobox	ChickenMSG-Hoxd11.Flag-ChIP-Seq	GSE86088	Homer	VGCCATAAAA	1	1	108	0.3871	20043	0.4118	5.52848
C2	Early-down	ETV4	ETS	HepG2-ETV4-ChIP-Seq	ENCODE	Homer	ACCGGAAGTG	1	1	71	0.2545	13492.6	0.2772	6.20352
C2	Early-down	p63	p53	Keratinocyte-p63-ChIP-Seq	GSE17611	Homer	NNDRCATGYCYNRRCATGYH	1	1	20	0.0717	4149.7	0.0853	6.98559
C2	Early-down	MafK	bZIP	C2C12-MafK-ChIP-Seq	GSE36030	Homer	GCTGASTCAGCA	1	1	13	0.0466	2812.9	0.0578	8.22154
C2	Early-down	Six1	Homeobox	Myoblast-Six1-ChIP-Chip	GSE20150	Homer	GKVTCADRTTWC	1	1	10	0.0358	2254.7	0.0463	8.09506
C2	Early-down	Nkx2.1	Homeobox	LungAC-Nkx2.1-ChIP-Seq	GSE43252	Homer	RSCACTYRAG	1	1	157	0.5627	28726.4	0.5902	5.68755
C2	Early-down	MYNN	Zf	HEK293-MYNN.eGFP-ChIP-Seq	Encode	Homer	TTCAAAWTAAAAGTC	1	1	9	0.0323	2078.4	0.0427	8.24115
C2	Early-down	Pit1	Homeobox	GCrat-Pit1-ChIP-Seq	GSE58009	Homer	ATGMATATDC	1	1	42	0.1505	8356.9	0.1717	6.40158
C2	Early-down	ZBTB33	Zf	GM12878-ZBTB33-ChIP-Seq	GSE32465	Homer	GGVTCTCGCGAGAAC	1	1	2	0.0072	582.9	0.012	7.64806
C2	Early-down	ZNF669	Zf	HEK293-ZNF669.GFP-ChIP-Seq	GSE58341	Homer	GARTGGTCATCGCCC	1	1	3	0.0108	820.8	0.0169	8.24108
C2	Early-down	PBX1	Homeobox	MCF7-PBX1-ChIP-Seq	GSE28007	Homer	GSCTGTCACTCA	1	1	4	0.0143	1048.4	0.0215	8.65539
C2	Early-down	PAX5	Paired,Homeobox,condensed	GM12878-PAX5-ChIP-Seq	GSE32465	Homer	GTCACGCTCSCTGM	1	1	5	0.0179	1274.9	0.0262	8.4801
C2	Early-down	n-Myc	bHLH	mES-nMyc-ChIP-Seq	GSE11431	Homer	VRCCACGTGG	1	1	42	0.1505	8413.8	0.1729	5.71927
C2	Early-down	Mouse_Recombination_Hotspot	Zf	Testis-DMC1-ChIP-Seq	GSE24438	Homer	ACTYKNATTCGTGNTACTTC	1	1	2	0.0072	597.7	0.0123	9.68214
C2	Early-down	Egr1	Zf	K562-Egr1-ChIP-Seq	GSE32465	Homer	TGCGTGGGYG	1	1	49	0.1756	9732.5	0.2	7.3533
C2	Early-down	GATA3	Zf,DR8	iTreg-Gata3-ChIP-Seq	GSE20898	Homer	AGATSTNDNNDSAGATAASN	1	1	3	0.0108	845.3	0.0174	9.25002
C2	Early-down	MITF	bHLH	MastCells-MITF-ChIP-Seq	GSE48085	Homer	RTCATGTGAC	1	1	49	0.1756	9765.2	0.2006	6.35457
C2	Early-down	Tcf3	HMG	mES-Tcf3-ChIP-Seq	GSE11724	Homer	ASWTCAAAGG	1	1	11	0.0394	2559.1	0.0526	8.52904
C2	Early-down	Erra	NR	HepG2-Erra-ChIP-Seq	GSE31477	Homer	CAAAGGTCAG	1	1	127	0.4552	23737.3	0.4877	5.74942
C2	Early-down	Hoxb4	Homeobox	ES-Hoxb4-ChIP-Seq	GSE34014	Homer	TGATTRATGGCY	1	1	7	0.0251	1749	0.0359	7.99284
C2	Early-down	CDX4	Homeobox	ZebrafishEmbryos-Cdx4.Myc-ChIP-Seq	GSE48254	Homer	NGYCATAAAWCH	1	1	36	0.129	7398.8	0.152	6.82675
C2	Early-down	PRDM14	Zf	H1-PRDM14-ChIP-Seq	GSE22767	Homer	RGGTCTCTAACY	1	1	15	0.0538	3403.3	0.0699	7.19447
C2	Early-down	Gata1	Zf	K562-GATA1-ChIP-Seq	GSE18829	Homer	SAGATAAGRV	1	1	23	0.0824	5048.6	0.1037	6.40298
C2	Early-down	MafF	bZIP	HepG2-MafF-ChIP-Seq	GSE31477	Homer	HWWGTCAGCAWWTTT	1	1	9	0.0323	2250.6	0.0462	8.35902
C2	Early-down	Elk1	ETS	Hela-Elk1-ChIP-Seq	GSE31477	Homer	HACTTCCGGY	1	1	34	0.1219	7158.1	0.1471	6.72183
C2	Early-down	GRHL2	CP2	HBE-GRHL2-ChIP-Seq	GSE46194	Homer	AAACYKGTTWDACMRGTTTB	1	1	16	0.0573	3708.5	0.0762	6.95492
C2	Early-down	STAT5	Stat	mCD4+-Stat5-ChIP-Seq	GSE12346	Homer	RTTTCTNAGAAA	1	1	15	0.0538	3513.9	0.0722	6.28542
C2	Early-down	ZNF768	Zf	Rajj-ZNF768-ChIP-Seq	GSE111879	Homer	RHHCAGAGAGGB	1	1	1	0.0036	420	0.0086	9.65865
C2	Early-down	IRF1	IRF	PBMC-IRF1-ChIP-Seq	GSE43036	Homer	GAAAGTGAAAGT	1	1	4	0.0143	1198.8	0.0246	9.68899
C2	Early-down	ELF1	ETS	Jurkat-ELF1-ChIP-Seq	SRA014231	Homer	AVCCGGAAGT	1	1	31	0.1111	6678.8	0.1372	6.81931
C2	Early-down	BMAL1	bHLH	Liver-Bmal1-ChIP-Seq	GSE39860	Homer	GNCACGTG	1	1	99	0.3548	19149.3	0.3934	4.83962
C2	Early-down	SPDEF	ETS	VCaP-SPDEF-ChIP-Seq	SRA014231	Homer	ASWTCCTGBT	1	1	57	0.2043	11568.8	0.2377	6.87195
C2	Early-down	EWS:FLI1-fusion	ETS	SK_N_MC-EWS:FLI1-ChIP-Seq	SRA014231	Homer	VACAGGAAAT	1	1	31	0.1111	6707.5	0.1378	4.87542
C2	Early-down	ZBTB12	Zf	HEK293-ZBTB12.GFP-ChIP-Seq	GSE58341	Homer	NGNTCTAGAACCNGV	1	1	24	0.086	5368.6	0.1103	7.36575
C2	Early-down	ZNF143|STAF	Zf	CUTLL-ZNF143-ChIP-Seq	GSE29600	Homer	ATTTCCCAGVAKSCY	1	1	21	0.0753	4791.3	0.0984	8.6236
C2	Early-down	NPAS2	bHLH	Liver-NPAS2-ChIP-Seq	GSE39860	Homer	KCCACGTGAC	1	1	62	0.2222	12565.8	0.2582	6.1426
C2	Early-down	PAX5	Paired,Homeobox	GM12878-PAX5-ChIP-Seq	GSE32465	Homer	GCAGCCAAGCRTGACH	1	1	21	0.0753	4822	0.0991	7.20944
C2	Early-down	HIF-1a	bHLH	MCF7-HIF1a-ChIP-Seq	GSE28352	Homer	TACGTGCV	1	1	10	0.0358	2585.5	0.0531	7.05527
C2	Early-down	THRb	NR	Liver-NR1A2-ChIP-Seq	GSE52613	Homer	TRAGGTCA	1	1	195	0.6989	35857.3	0.7367	5.1173
C2	Early-down	ETV1	ETS	GIST48-ETV1-ChIP-Seq	GSE22441	Homer	AACCGGAAGT	1	1	80	0.2867	15911.3	0.3269	6.28588
C2	Early-down	PU.1:IRF8	ETS:IRF	pDC-Irf8-ChIP-Seq	GSE66899	Homer	GGAAGTGAAAST	1	1	6	0.0215	1768.7	0.0363	8.98699
C2	Early-down	Unknown	Homeobox	Limb-p300-ChIP-Seq	NA	Homer	SSCMATWAAA	1	1	24	0.086	5524.3	0.1135	6.76582
C2	Early-down	PAX3:FKHR-fusion	Paired,Homeobox	Rh4-PAX3:FKHR-ChIP-Seq	GSE19063	Homer	ACCRTGACTAATTNN	1	1	6	0.0215	1780.3	0.0366	7.41361
C2	Early-down	ERG	ETS	VCaP-ERG-ChIP-Seq	GSE14097	Homer	ACAGGAAGTG	1	1	87	0.3118	17288.8	0.3552	6.43341
C2	Early-down	HIF-1b	HLH	T47D-HIF1b-ChIP-Seq	GSE59937	Homer	RTACGTGC	1	1	60	0.2151	12409.3	0.255	5.71312
C2	Early-down	ETS:RUNX	ETS,Runt	Jurkat-RUNX1-ChIP-Seq	GSE17954	Homer	RCAGGATGTGGT	1	1	3	0.0108	1085.4	0.0223	8.58104
C2	Early-down	NRF	NRF	Promoter	NA	Homer	STGCGCATGCGC	1	1	12	0.043	3150.4	0.0647	1.45717
C2	Early-down	p53	p53	Saos-p53-ChIP-Seq	GSE15780	Homer	RRCATGYCYRGRCATGYYYN	1	1	3	0.0108	1104.1	0.0227	8.59219
C2	Early-down	p53	p53	Saos-p53-ChIP-Seq	NA	Homer	RRCATGYCYRGRCATGYYYN	1	1	3	0.0108	1104.1	0.0227	8.59219
C2	Early-down	MNT	bHLH	HepG2-MNT-ChIP-Seq	Encode	Homer	DGCACACGTG	1	1	57	0.2043	11965.8	0.2458	4.96758
C2	Early-down	IRF8	IRF	BMDM-IRF8-ChIP-Seq	GSE77884	Homer	GRAASTGAAAST	1	1	11	0.0394	3040.5	0.0625	8.61756
C2	Early-down	ERRg	NR	Kidney-ESRRG-ChIP-Seq	GSE104905	Homer	GTGACCTTGRVN	1	1	40	0.1434	8892.8	0.1827	7.03644
C2	Early-down	Elk4	ETS	Hela-Elk4-ChIP-Seq	GSE31477	Homer	NRYTTCCGGY	1	1	31	0.1111	7177.3	0.1475	6.6569
C2	Early-down	OCT:OCT	POU,Homeobox	NPC-OCT6-ChIP-Seq	GSE43916	Homer	YATGCATATRCATRT	1	1	3	0.0108	1229.7	0.0253	9.58608
C2	Early-down	NFkB-p65	RHD	GM12787-p65-ChIP-Seq	GSE19485	Homer	WGGGGATTTCCC	1	1	20	0.0717	5061.8	0.104	7.18817
C2	Early-down	c-Myc	bHLH	mES-cMyc-ChIP-Seq	GSE11431	Homer	VVCCACGTGG	1	1	26	0.0932	6297.3	0.1294	6.80884
C2	Early-down	SCRT1	Zf	HEK293-SCRT1.eGFP-ChIP-Seq	Encode	Homer	GCAACAGGTG	1	1	12	0.043	3403	0.0699	6.32471
C2	Early-down	TR4	NR,DR1	Hela-TR4-ChIP-Seq	GSE24685	Homer	GAGGTCAAAGGTCA	1	1	3	0.0108	1289.3	0.0265	9.35237
C2	Early-down	ARE	NR	LNCAP-AR-ChIP-Seq	GSE27824	Homer	RGRACASNSTGTYCYB	1	1	11	0.0394	3314.4	0.0681	7.77899
C2	Early-down	Hoxc9	Homeobox	Ainv15-Hoxc9-ChIP-Seq	GSE21812	Homer	GGCCATAAATCA	1	1	14	0.0502	3984.8	0.0819	6.35975
C2	Early-down	Nur77	NR	K562-NR4A1-ChIP-Seq	GSE31363	Homer	TGACCTTTNCNT	1	1	3	0.0108	1439.8	0.0296	8.73646
C2	Early-down	Zac1	Zf	Neuro2A-Plagl1-ChIP-Seq	GSE75942	Homer	HAWGRGGCCM	1	1	143	0.5125	28216.6	0.5797	5.51033
C2	Early-down	YY1	Zf	Promoter	NA	Homer	CAAGATGGCGGC	1	1	2	0.0072	1209.5	0.0249	8.7834
C2	Early-down	IRF2	IRF	Erythroblas-IRF2-ChIP-Seq	GSE36985	Homer	GAAASYGAAASY	1	1	1	0.0036	881.6	0.0181	8.04207
C2	Early-down	RXR	NR,DR1	3T3L1-RXR-ChIP-Seq	GSE13511	Homer	TAGGGCAAAGGTCA	1	1	54	0.1935	12489.5	0.2566	6.64118
C2	Early-down	STAT1	Stat	HelaS3-STAT1-ChIP-Seq	GSE12782	Homer	NATTTCCNGGAAAT	1	1	8	0.0287	2951.3	0.0606	7.98429
C2	Early-down	Esrrb	NR	mES-Esrrb-ChIP-Seq	GSE11431	Homer	KTGACCTTGA	1	1	26	0.0932	6996.6	0.1438	7.14928
C2	Early-down	PSE	SNAPc	K562-mStart-Seq	NA	Homer	WAVTCACCMTAASYDAAAAG	1	1	16	0.0573	4981.7	0.1024	7.0549
C2	Early-down	RARg	NR	ES-RARg-ChIP-Seq	GSE30538	Homer	AGGTCAAGGTCA	1	1	1	0.0036	1136.6	0.0234	11.1266
C2	Early-down	PPARa	NR,DR1	Liver-Ppara-ChIP-Seq	GSE47954	Homer	VNAGGKCAAAGGTCA	1	1	46	0.1649	11577.5	0.2379	7.01326
C2	Early-down	Isl1	Homeobox	Neuron-Isl1-ChIP-Seq	GSE31456	Homer	CTAATKGV	1	1	73	0.2616	16885.4	0.3469	5.47186
C2	Early-down	Slug	Zf	Mesoderm-Snai2-ChIP-Seq	GSE61475	Homer	SNGCACCTGCHS	1	1	25	0.0896	7347.3	0.151	7.2621
C2	Early-down	PPARE	NR,DR1	3T3L1-Pparg-ChIP-Seq	GSE13511	Homer	TGACCTTTGCCCCA	1	1	39	0.1398	10362.9	0.2129	6.96882
C2	Early-down	E2A	bHLH,near_PU.1	Bcell-PU.1-ChIP-Seq	GSE21512	Homer	NVCACCTGBN	1	1	71	0.2545	17052.5	0.3504	7.41752
C2	Early-down	HNF4a	NR,DR1	HepG2-HNF4a-ChIP-Seq	GSE25021	Homer	CARRGKBCAAAGTYCA	1	1	14	0.0502	5262	0.1081	7.85757
C2	Early-down	COUP-TFII	NR	Artia-Nr2f2-ChIP-Seq	GSE46497	Homer	AGRGGTCA	1	1	74	0.2652	17864.7	0.367	5.83688
C2	Early-down	RARa	NR	K562-RARa-ChIP-Seq	Encode	Homer	TTGAMCTTTG	1	1	122	0.4373	27402.8	0.563	5.64635
C2	Early-down	ZEB2	Zf	SNU398-ZEB2-ChIP-Seq	GSE103048	Homer	GNMCAGGTGTGC	1	1	40	0.1434	12101.9	0.2486	6.93338
C2	Early-down	EAR2	NR	K562-NR2F6-ChIP-Seq	Encode	Homer	NRBCARRGGTCA	1	1	47	0.1685	13953.6	0.2867	6.65536
C2	Early-down	COUP-TFII	NR	K562-NR2F1-ChIP-Seq	Encode	Homer	GKBCARAGGTCA	1	1	53	0.19	15215.4	0.3126	6.40604
C2	Early-down	ZEB1	Zf	PDAC-ZEB1-ChIP-Seq	GSE64557	Homer	VCAGGTRDRY	1	1	75	0.2688	19892.5	0.4087	5.94141
C2	Early-down	DUX	Homeobox	C2C12-Dux-ChIP-Seq	GSE87279	Homer	BCWGATTCAATCAAN	1	1	0	0	21.8	0.0004	12.6144
C2	Early-down	OCT:OCT	POU,Homeobox,IR1	NPC-Brn2-ChIP-Seq	GSE35496	Homer	ATGAATWATTCATGA	1	1	0	0	97.3	0.002	10.7838
C2	Early-down	OCT:OCT	POU,Homeobox	NPC-Brn1-ChIP-Seq	GSE35496	Homer	ATGAATATTCATGAG	1	1	0	0	61.7	0.0013	12.3184
C2	Early-down	p73	p53	Trachea-p73-ChIP-Seq	PRJNA310161	Homer	NRRRCAWGTCCDGRCATGYY	1	1	0	0	515.9	0.0106	9.65302
C2	Early-down	Pax7	Paired,Homeobox,longest	Myoblast-Pax7-ChIP-Seq	GSE25064	Homer	NTAATTDGCYAATTANNWWD	1	1	0	0	199.8	0.0041	10.9116
C2	Early-down	Pax7	Paired,Homeobox,long	Myoblast-Pax7-ChIP-Seq	GSE25064	Homer	TAATCHGATTAC	1	1	0	0	139.6	0.0029	9.80349
C2	Early-down	T1ISRE	IRF	ThioMac-Ifnb-Expression	NA	Homer	ACTTTCGTTTCT	1	1	0	0	82.9	0.0017	11.712
C2	Early-down	ZFP3	Zf	HEK293-ZFP3.GFP-ChIP-Seq	GSE58341	Homer	GGGTTTTGAAGGATGARTAGGAGTT	1	1	0	0	16.4	0.0003	6.71656
C2	Early-down	ZNF16	Zf	HEK293-ZNF16.GFP-ChIP-Seq	GSE58341	Homer	MACCTTCYATGGCTCCCTAKTGCCY	1	1	0	0	80.1	0.0016	9.5569
C2	Early-down	ZNF528	Zf	HEK293-ZNF528.GFP-ChIP-Seq	GSE58341	Homer	AGAAATGACTTCCCT	1	1	0	0	72.9	0.0015	12.8603
C3	Early-down	Sox17	HMG	Endoderm-Sox17-ChIP-Seq	GSE61475	Homer	CCATTGTTYB	1e-15	0	104	0.3068	6583.2	0.1361	6.82454
C3	Early-down	Sox2	HMG	mES-Sox2-ChIP-Seq	GSE11431	Homer	BCCATTGTTC	1e-12	0	115	0.3392	8365.3	0.173	6.78547
C3	Early-down	Atf7	bZIP	3T3L1-Atf7-ChIP-Seq	GSE56872	Homer	NGRTGACGTCAY	1e-12	0	74	0.2183	4327.6	0.0895	6.73534
C3	Early-down	Atf2	bZIP	3T3L1-Atf2-ChIP-Seq	GSE56872	Homer	NRRTGACGTCAT	1e-11	0	59	0.174	3091.1	0.0639	7.09852
C3	Early-down	Sox4	HMG	proB-Sox4-ChIP-Seq	GSE50066	Homer	YCTTTGTTCC	1e-11	0	110	0.3245	8227.6	0.1701	7.06867
C3	Early-down	Sox6	HMG	Myotubes-Sox6-ChIP-Seq	GSE32627	Homer	CCATTGTTNY	1e-11	0	159	0.469	14206	0.2937	6.33114
C3	Early-down	Sox15	HMG	CPA-Sox15-ChIP-Seq	GSE62909	Homer	RAACAATGGN	1e-11	0	123	0.3628	9841.5	0.2035	7.12231
C3	Early-down	c-Jun-CRE	bZIP	K562-cJun-ChIP-Seq	GSE31477	Homer	ATGACGTCATCY	1e-10	0	53	0.1563	2726	0.0564	7.33792
C3	Early-down	Sox9	HMG	Limb-SOX9-ChIP-Seq	GSE73225	Homer	AGGVNCCTTTGT	1e-09	0	109	0.3215	8633.2	0.1785	7.19245
C3	Early-down	JunD	bZIP	K562-JunD-ChIP-Seq	NA	Homer	ATGACGTCATCN	1e-09	0	29	0.0855	995.2	0.0206	8.84006
C3	Early-down	Sox10	HMG	SciaticNerve-Sox3-ChIP-Seq	GSE35132	Homer	CCWTTGTYYB	1e-09	0	162	0.4779	15205.5	0.3144	6.6401
C3	Early-down	Sox3	HMG	NPC-Sox3-ChIP-Seq	GSE33059	Homer	CCWTTGTY	1e-09	0	165	0.4867	15837.7	0.3275	6.56384
C3	Early-down	Atf1	bZIP	K562-ATF1-ChIP-Seq	GSE31477	Homer	GATGACGTCA	1e-07	0	79	0.233	5931.6	0.1226	6.25078
C3	Early-down	ZBTB18	Zf	HEK293-ZBTB18.GFP-ChIP-Seq	GSE58341	Homer	AACATCTGGA	1e-06	0	71	0.2094	5578.7	0.1153	7.77411
C3	Early-down	CRE	bZIP	Promoter	NA	Homer	CSGTGACGTCAC	1e-06	0	42	0.1239	2655.1	0.0549	5.91825
C3	Early-down	MyoD	bHLH	Myotube-MyoD-ChIP-Seq	GSE21614	Homer	RRCAGCTGYTSY	1e-05	0.0001	106	0.3127	10036	0.2075	7.24983
C3	Early-down	BHLHA15	bHLH	NIH3T3-BHLHB8.HA-ChIP-Seq	GSE119782	Homer	NAMCAGCTGK	1e-05	0.0002	145	0.4277	15251.3	0.3153	6.8237
C3	Early-down	Ap4	bHLH	AML-Tfap4-ChIP-Seq	GSE45738	Homer	NAHCAGCTGD	0.0001	0.0002	135	0.3982	13980.4	0.2891	6.11698
C3	Early-down	Tcf21	bHLH	ArterySmoothMuscle-Tcf21-ChIP-Seq	GSE61369	Homer	NAACAGCTGG	0.0001	0.0003	112	0.3304	11107.3	0.2297	6.46026
C3	Early-down	Myf5	bHLH	GM-Myf5-ChIP-Seq	GSE24852	Homer	BAACAGCTGT	0.0001	0.0004	88	0.2596	8209.7	0.1697	7.32271
C3	Early-down	MyoG	bHLH	C2C12-MyoG-ChIP-Seq	GSE36024	Homer	AACAGCTG	0.0001	0.0006	121	0.3569	12440.7	0.2572	6.58794
C3	Early-down	Tcf12	bHLH	GM12878-Tcf12-ChIP-Seq	GSE32465	Homer	VCAGCTGYTG	0.0001	0.0012	113	0.3333	11626.4	0.2404	7.14623
C3	Early-down	NFIL3	bZIP	HepG2-NFIL3-ChIP-Seq	Encode	Homer	VTTACGTAAYNNNNN	0.0001	0.0012	54	0.1593	4494.4	0.0929	6.41388
C3	Early-down	Tlx?	NR	NPC-H3K4me1-ChIP-Seq	GSE16256	Homer	CTGGCAGSCTGCCA	0.0001	0.0013	57	0.1681	4845.3	0.1002	7.86509
C3	Early-down	NF1	CTF	LNCAP-NF1-ChIP-Seq	Unpublished	Homer	CYTGGCABNSTGCCAR	0.0001	0.0015	51	0.1504	4206.5	0.087	7.59834
C3	Early-down	Atoh1	bHLH	Cerebellum-Atoh1-ChIP-Seq	GSE22111	Homer	VNRVCAGCTGGY	0.001	0.0019	117	0.3451	12310	0.2545	6.0307
C3	Early-down	Twist2	bHLH	Myoblast-Twist2.Ty1-ChIP-Seq	GSE127998	Homer	MCAGCTGBYH	0.001	0.0041	165	0.4867	19000.2	0.3928	3.81893
C3	Early-down	Ascl2	bHLH	ESC-Ascl2-ChIP-Seq	GSE97712	Homer	SSRGCAGCTGCH	0.001	0.0054	127	0.3746	13948.2	0.2884	5.54496
C3	Early-down	X-box	HTH	NPC-H3K4me1-ChIP-Seq	GSE16256	Homer	GGTTGCCATGGCAA	0.01	0.0144	18	0.0531	1113.5	0.023	9.02111
C3	Early-down	Maz	Zf	HepG2-Maz-ChIP-Seq	GSE31477	Homer	GGGGGGGG	0.01	0.0394	160	0.472	19204.7	0.3971	7.47877
C3	Early-down	KLF14	Zf	HEK293-KLF14.GFP-ChIP-Seq	GSE58341	Homer	RGKGGGCGKGGC	0.01	0.0412	190	0.5605	23468.7	0.4852	6.33053
C3	Early-down	Jun-AP1	bZIP	K562-cJun-ChIP-Seq	GSE31477	Homer	GATGASTCATCN	0.01	0.0439	25	0.0737	1974	0.0408	8.48626
C3	Early-down	Oct4:Sox17	POU,Homeobox,HMG	F9-Sox17-ChIP-Seq	GSE44553	Homer	CCATTGTATGCAAAT	0.01	0.0439	16	0.0472	1055.7	0.0218	8.78869
C3	Early-down	Zfp281	Zf	ES-Zfp281-ChIP-Seq	GSE81042	Homer	CCCCTCCCCCAC	0.01	0.0439	44	0.1298	4132.9	0.0855	9.77408
C3	Early-down	E2A	bHLH	proBcell-E2A-ChIP-Seq	GSE21978	Homer	DNRCAGCTGY	0.01	0.0439	144	0.4248	17084.1	0.3532	6.42721
C3	Early-down	NeuroG2	bHLH	Fibroblast-NeuroG2-ChIP-Seq	GSE75910	Homer	ACCATCTGTT	0.01	0.047	137	0.4041	16174.9	0.3344	5.7876
C3	Early-down	TCF4	bHLH	SHSY5Y-TCF4-ChIP-Seq	GSE96915	Homer	SMCATCTGKH	0.01	0.0483	138	0.4071	16332.3	0.3377	7.0005
C3	Early-down	AP-1	bZIP	ThioMac-PU.1-ChIP-Seq	GSE21512	Homer	VTGACTCATC	0.01	0.0487	59	0.174	5998.1	0.124	6.04954
C3	Early-down	BATF	bZIP	Th17-BATF-ChIP-Seq	GSE39756	Homer	DATGASTCAT	0.01	0.0512	53	0.1563	5282.2	0.1092	6.40806
C3	Early-down	STAT6	Stat	CD4-Stat6-ChIP-Seq	GSE22104	Homer	ABTTCYYRRGAA	0.01	0.0512	46	0.1357	4440.3	0.0918	7.32879
C3	Early-down	NeuroD1	bHLH	Islet-NeuroD1-ChIP-Seq	GSE30298	Homer	GCCATCTGTT	0.01	0.0515	82	0.2419	8942.2	0.1849	7.08142
C3	Early-down	ZNF7	Zf	HepG2-ZNF7.Flag-ChIP-Seq	Encode	Homer	CTGCCWVCTTTTRTA	0.01	0.0527	50	0.1475	4943.8	0.1022	6.31438
C3	Early-down	Rfx1	HTH	NPC-H3K4me1-ChIP-Seq	GSE16256	Homer	KGTTGCCATGGCAA	0.01	0.0544	27	0.0796	2272.4	0.047	8.05843
C3	Early-down	OCT:OCT	POU,Homeobox,IR1	NPC-Brn2-ChIP-Seq	GSE35496	Homer	ATGAATWATTCATGA	0.01	0.058	4	0.0118	103.3	0.0021	10.7838
C3	Early-down	JunB	bZIP	DendriticCells-Junb-ChIP-Seq	GSE36099	Homer	RATGASTCAT	0.01	0.06	45	0.1327	4389.1	0.0907	6.68931
C3	Early-down	RUNX1	Runt	Jurkat-RUNX1-ChIP-Seq	GSE29180	Homer	AAACCACARM	0.01	0.0808	91	0.2684	10316.6	0.2133	6.64863
C3	Early-down	Ascl1	bHLH	NeuralTubes-Ascl1-ChIP-Seq	GSE55840	Homer	NNVVCAGCTGBN	0.1	0.0905	148	0.4366	18087.4	0.374	6.24294
C3	Early-down	Fra1	bZIP	BT549-Fra1-ChIP-Seq	GSE46166	Homer	NNATGASTCATH	0.1	0.0905	44	0.1298	4389.1	0.0907	7.01174
C3	Early-down	PBX1	Homeobox	MCF7-PBX1-ChIP-Seq	GSE28007	Homer	GSCTGTCACTCA	0.1	0.0905	13	0.0383	885.5	0.0183	8.65539
C3	Early-down	Sp5	Zf	mES-Sp5.Flag-ChIP-Seq	GSE72989	Homer	RGKGGGCGGAGC	0.1	0.1043	132	0.3894	15974.3	0.3303	6.51975
C3	Early-down	Fra2	bZIP	Striatum-Fra2-ChIP-Seq	GSE43429	Homer	GGATGACTCATC	0.1	0.1088	39	0.115	3850.9	0.0796	6.38445
C3	Early-down	Pax8	Paired,Homeobox	Thyroid-Pax8-ChIP-Seq	GSE26938	Homer	GTCATGCHTGRCTGS	0.1	0.1088	40	0.118	3974.2	0.0822	8.21097
C3	Early-down	STAT6	Stat	Macrophage-Stat6-ChIP-Seq	GSE38377	Homer	TTCCKNAGAA	0.1	0.1129	45	0.1327	4606.2	0.0952	6.48048
C3	Early-down	Hoxa10	Homeobox	ChickenMSG-Hoxa10.Flag-ChIP-Seq	GSE86088	Homer	GGYAATGAAA	0.1	0.1231	44	0.1298	4513.3	0.0933	7.08661
C3	Early-down	DMRT6	DM	Testis-DMRT6-ChIP-Seq	GSE60440	Homer	YDGHTACAWTGTADC	0.1	0.1422	20	0.059	1713.4	0.0354	7.81831
C3	Early-down	Fosl2	bZIP	3T3L1-Fosl2-ChIP-Seq	GSE56872	Homer	NATGASTCABNN	0.1	0.1465	29	0.0855	2757.2	0.057	7.02941
C3	Early-down	Smad2	MAD	ES-SMAD2-ChIP-Seq	GSE29422	Homer	CTGTCTGG	0.1	0.1484	145	0.4277	18014.6	0.3725	6.10069
C3	Early-down	Atf3	bZIP	GBM-ATF3-ChIP-Seq	GSE33912	Homer	DATGASTCATHN	0.1	0.1518	49	0.1445	5220.6	0.1079	5.97965
C3	Early-down	ZKSCAN1	Zf	HepG2-ZKSCAN1-ChIP-Seq	Encode	Homer	GCACAYAGTAGGKCY	0.1	0.1619	6	0.0177	311.1	0.0064	10.0667
C3	Early-down	KLF5	Zf	LoVo-KLF5-ChIP-Seq	GSE49402	Homer	DGGGYGKGGC	0.1	0.162	149	0.4395	18643.2	0.3855	6.67009
C3	Early-down	Rfx2	HTH	LoVo-RFX2-ChIP-Seq	GSE49402	Homer	GTTGCCATGGCAACM	0.1	0.1681	14	0.0413	1102.8	0.0228	8.14702
C3	Early-down	Olig2	bHLH	Neuron-Olig2-ChIP-Seq	GSE30882	Homer	RCCATMTGTT	0.1	0.1692	153	0.4513	19242.8	0.3979	6.05339
C3	Early-down	Oct11	POU,Homeobox	NCIH1048-POU2F3-ChIP-seq	GSE115123	Homer	GATTTGCATA	0.1	0.1759	26	0.0767	2472.1	0.0511	6.63361
C3	Early-down	ZNF467	Zf	HEK293-ZNF467.GFP-ChIP-Seq	GSE58341	Homer	TGGGGAAGGGCM	0.1	0.1788	98	0.2891	11729.7	0.2425	7.76178
C3	Early-down	Hoxd12	Homeobox	ChickenMSG-Hoxd12.Flag-ChIP-Seq	GSE86088	Homer	HDGYAATGAAAN	0.1	0.1791	117	0.3451	14315.6	0.296	6.23557
C3	Early-down	Rfx6	HTH	Min6b1-Rfx6.HA-ChIP-Seq	GSE62844	Homer	TGTTKCCTAGCAACM	0.1	0.1791	104	0.3068	12547.1	0.2594	3.33026
C3	Early-down	Unknown-ESC-element	?	mES-Nanog-ChIP-Seq	GSE11724	Homer	CACAGCAGGGGG	0.1	0.1791	61	0.1799	6856.8	0.1418	7.69767
C3	Early-down	bHLHE40	bHLH	HepG2-BHLHE40-ChIP-Seq	GSE31477	Homer	KCACGTGMCN	0.1	0.1791	34	0.1003	3451	0.0714	7.06883
C3	Early-down	Sp2	Zf	HEK293-Sp2.eGFP-ChIP-Seq	Encode	Homer	YGGCCCCGCCCC	0.1	0.1791	162	0.4779	20579.8	0.4255	5.66256
C3	Early-down	RFX	HTH	K562-RFX3-ChIP-Seq	SRA012198	Homer	CGGTTGCCATGGCAAC	0.1	0.1791	13	0.0383	1020.2	0.0211	8.57081
C3	Early-down	Srebp2	bHLH	HepG2-Srebp2-ChIP-Seq	GSE31477	Homer	CGGTCACSCCAC	0.1	0.1791	16	0.0472	1347.8	0.0279	8.76533
C3	Early-down	Hoxd13	Homeobox	ChickenMSG-Hoxd13.Flag-ChIP-Seq	GSE86088	Homer	NCYAATAAAA	0.1	0.1791	103	0.3038	12449.8	0.2574	6.01605
C3	Early-down	Klf9	Zf	GBM-Klf9-ChIP-Seq	GSE62211	Homer	GCCACRCCCACY	0.1	0.1791	65	0.1917	7400.1	0.153	7.93508
C3	Early-down	Rfx5	HTH	GM12878-Rfx5-ChIP-Seq	GSE31477	Homer	SCCTAGCAACAG	0.1	0.1808	38	0.1121	3974	0.0822	8.12207
C3	Early-down	NFY	CCAAT	Promoter	NA	Homer	RGCCAATSRG	0.1	0.1897	77	0.2271	9021.2	0.1865	4.70551
C3	Early-down	Hoxd10	Homeobox	ChickenMSG-Hoxd10.Flag-ChIP-Seq	GSE86088	Homer	GGCMATGAAA	0.1	0.2052	80	0.236	9461.5	0.1956	6.61875
C3	Early-down	Brn2	POU,Homeobox	NPC-Brn2-ChIP-Seq	GSE35496	Homer	ATGAATATTC	0.1	0.2171	9	0.0265	646.6	0.0134	9.45437
C3	Early-down	HEB	bHLH	mES-Heb-ChIP-Seq	GSE53233	Homer	VCAGCTGBNN	0.1	0.2289	165	0.4867	21229.7	0.4389	5.47068
C3	Early-down	Hoxa13	Homeobox	ChickenMSG-Hoxa13.Flag-ChIP-Seq	GSE86088	Homer	CYHATAAAAN	0.1	0.2289	148	0.4366	18841.5	0.3896	5.79616
C3	Early-down	bHLHE41	bHLH	proB-Bhlhe41-ChIP-Seq	GSE93764	Homer	KCACGTGMCN	0.1	0.2289	110	0.3245	13582.5	0.2808	5.31838
C3	Early-down	Smad4	MAD	ESC-SMAD4-ChIP-Seq	GSE29422	Homer	VBSYGTCTGG	0.1	0.2344	145	0.4277	18454.3	0.3816	6.4299
C3	Early-down	Pbx3	Homeobox	GM12878-PBX3-ChIP-Seq	GSE32465	Homer	SCTGTCAMTCAN	0.1	0.2344	26	0.0767	2604.8	0.0539	8.24848
C3	Early-down	Usf2	bHLH	C2C12-Usf2-ChIP-Seq	GSE36030	Homer	GTCACGTGGT	0.1	0.2344	31	0.0914	3218	0.0665	7.54255
C3	Early-down	ZNF675	Zf	HEK293-ZNF675.GFP-ChIP-Seq	GSE58341	Homer	ARGAGGMCAAAATGW	0.1	0.2344	14	0.0413	1203.7	0.0249	8.91287
C3	Early-down	Phox2b	Homeobox	CLBGA-PHOX2B-ChIP-Seq	GSE90683	Homer	TTAATTNAATTA	0.1	0.2344	14	0.0413	1205.2	0.0249	4.10044
C3	Early-down	SCL	bHLH	HPC7-Scl-ChIP-Seq	GSE13511	Homer	AVCAGCTG	0.1	0.2344	281	0.8289	38268.6	0.7912	5.10049
C3	Early-down	Foxo1	Forkhead	RAW-Foxo1-ChIP-Seq	Fan_et_al.	Homer	CTGTTTAC	0.1	0.2344	134	0.3953	16952.4	0.3505	6.16467
C3	Early-down	GLIS3	Zf	Thyroid-Glis3.GFP-ChIP-Seq	GSE103297	Homer	CTCCCTGGGAGGCCN	0.1	0.2347	142	0.4189	18083.4	0.3739	6.23448
C3	Early-down	REST-NRSF	Zf	Jurkat-NRSF-ChIP-Seq	NA	Homer	GGMGCTGTCCATGGTGCTGA	0.1	0.2595	3	0.0088	122.4	0.0025	12.2683
C3	Early-down	Cdx2	Homeobox	mES-Cdx2-ChIP-Seq	GSE14586	Homer	GYMATAAAAH	0.1	0.2655	49	0.1445	5571.7	0.1152	6.98658
C3	Early-down	Pax7	Paired,Homeobox,long	Myoblast-Pax7-ChIP-Seq	GSE25064	Homer	TAATCHGATTAC	0.1	0.2796	3	0.0088	127.2	0.0026	9.80349
C3	Early-down	Mouse_Recombination_Hotspot	Zf	Testis-DMC1-ChIP-Seq	GSE24438	Homer	ACTYKNATTCGTGNTACTTC	0.1	0.286	7	0.0206	497.7	0.0103	9.68214
C3	Early-down	E2F3	E2F	MEF-E2F3-ChIP-Seq	GSE71376	Homer	BTKGGCGGGAAA	0.1	0.2924	79	0.233	9597.1	0.1984	6.82745
C3	Early-down	PRDM9	Zf	Testis-DMC1-ChIP-Seq	GSE35498	Homer	ADGGYAGYAGCATCT	0.1	0.2974	45	0.1327	5116.7	0.1058	8.02355
C3	Early-down	Gfi1b	Zf	HPC7-Gfi1b-ChIP-Seq	GSE22178	Homer	MAATCACTGC	0.1	0.2992	53	0.1563	6164.5	0.1275	6.76835
C3	Early-down	STAT4	Stat	CD4-Stat4-ChIP-Seq	GSE22104	Homer	NYTTCCWGGAAR	0.1	0.2992	69	0.2035	8280.8	0.1712	5.22025
C3	Early-down	RBPJ:Ebox	?,bHLH	Panc1-Rbpj1-ChIP-Seq	GSE47459	Homer	GGGRAARRGRMCAGMTG	0.1	0.2992	34	0.1003	3721.1	0.0769	8.85279
C3	Early-down	Smad3	MAD	NPC-Smad3-ChIP-Seq	GSE36673	Homer	TWGTCTGV	0.1	0.3238	210	0.6195	28041.1	0.5798	6.11917
C3	Early-down	NRF1	NRF	MCF7-NRF1-ChIP-Seq	Unpublished	Homer	CTGCGCATGCGC	0.1	0.3243	32	0.0944	3507	0.0725	8.59578
C3	Early-down	KLF6	Zf	PDAC-KLF6-ChIP-Seq	GSE64557	Homer	MKGGGYGTGGCC	0.1	0.3243	123	0.3628	15720.9	0.325	5.44761
C3	Early-down	BORIS	Zf	K562-CTCFL-ChIP-Seq	GSE32465	Homer	CNNBRGCGCCCCCTGSTGGC	0.1	0.3243	33	0.0973	3638.8	0.0752	9.03288
C3	Early-down	Hoxd11	Homeobox	ChickenMSG-Hoxd11.Flag-ChIP-Seq	GSE86088	Homer	VGCCATAAAA	0.1	0.3244	146	0.4307	18949.3	0.3918	5.52848
C3	Early-down	Rbpj1	?	Panc1-Rbpj1-ChIP-Seq	GSE47459	Homer	HTTTCCCASG	0.1	0.3244	113	0.3333	14358.8	0.2969	6.78071
C3	Early-down	STAT1	Stat	HelaS3-STAT1-ChIP-Seq	GSE12782	Homer	NATTTCCNGGAAAT	0.1	0.3267	24	0.0708	2521.6	0.0521	7.98429
C3	Early-down	NF1-halfsite	CTF	LNCaP-NF1-ChIP-Seq	Unpublished	Homer	YTGCCAAG	0.1	0.3281	140	0.413	18134.3	0.3749	6.73433
C3	Early-down	Fox:Ebox	Forkhead,bHLH	Panc1-Foxa2-ChIP-Seq	GSE47459	Homer	NNNVCTGWGYAAACASN	0.1	0.3281	78	0.2301	9595.1	0.1984	7.01059
C3	Early-down	TEAD1	TEAD	HepG2-TEAD1-ChIP-Seq	Encode	Homer	CYRCATTCCA	0.1	0.3289	71	0.2094	8660.2	0.1791	4.44236
C3	Early-down	HIC1	Zf	Treg-ZBTB29-ChIP-Seq	GSE99889	Homer	TGCCAGCB	0.1	0.3401	178	0.5251	23548.8	0.4869	5.97511
C3	Early-down	CDX4	Homeobox	ZebrafishEmbryos-Cdx4.Myc-ChIP-Seq	GSE48254	Homer	NGYCATAAAWCH	0.1	0.3449	59	0.174	7089.8	0.1466	6.82675
C3	Early-down	KLF10	Zf	HEK293-KLF10.GFP-ChIP-Seq	GSE58341	Homer	GGGGGTGTGTCC	0.1	0.3522	81	0.2389	10064.3	0.2081	6.71966
C3	Early-down	OCT:OCT-short	POU,Homeobox	NPC-OCT6-ChIP-Seq	GSE43916	Homer	ATGCATWATGCATRW	0.1	0.3522	42	0.1239	4863.5	0.1006	-3.93033
C3	Early-down	DMRT1	DM	Testis-DMRT1-ChIP-Seq	GSE64892	Homer	TWGHWACAWTGTWDC	0.1	0.3522	19	0.056	1947	0.0403	7.68035
C3	Early-down	CArG	MADS	PUER-Srf-ChIP-Seq	Sullivan_et_al.	Homer	CCATATATGGNM	0.1	0.3538	23	0.0678	2445.9	0.0506	6.91146
C3	Early-down	Tgif1	Homeobox	mES-Tgif1-ChIP-Seq	GSE55404	Homer	YTGWCADY	0.1	0.3538	195	0.5752	26046.8	0.5385	4.97491
C3	Early-down	Unknown	Homeobox	Limb-p300-ChIP-Seq	NA	Homer	SSCMATWAAA	0.1	0.3608	45	0.1327	5284.3	0.1093	6.76582
C3	Early-down	Egr1	Zf	K562-Egr1-ChIP-Seq	GSE32465	Homer	TGCGTGGGYG	1	0.361	87	0.2566	10927	0.2259	7.3533
C3	Early-down	Oct6	POU,Homeobox	NPC-Pou3f1-ChIP-Seq	GSE35496	Homer	WATGCAAATGAG	1	0.361	30	0.0885	3344.4	0.0691	7.88155
C3	Early-down	GATA	Zf,IR3	iTreg-Gata3-ChIP-Seq	GSE20898	Homer	NNNNNBAGATAWYATCTVHN	1	0.361	12	0.0354	1125.8	0.0233	8.21231
C3	Early-down	ZNF136	Zf	HEK293-ZNF136.GFP-ChIP-Seq	GSE58341	Homer	YTKGATAHAGTATTCTWGGTNGGCA	1	0.361	8	0.0236	669	0.0138	9.0964
C3	Early-down	MafA	bZIP	Islet-MafA-ChIP-Seq	GSE30298	Homer	TGCTGACTCA	1	0.3624	74	0.2183	9180.3	0.1898	6.97933
C3	Early-down	Hoxa11	Homeobox	ChickenMSG-Hoxa11.Flag-ChIP-Seq	GSE86088	Homer	TTTTATGGCM	1	0.3653	139	0.41	18166	0.3756	5.40132
C3	Early-down	Ptf1a	bHLH	Panc1-Ptf1a-ChIP-Seq	GSE47459	Homer	ACAGCTGTTN	1	0.3767	202	0.5959	27148.7	0.5613	4.78455
C3	Early-down	TEAD4	TEA	Tropoblast-Tead4-ChIP-Seq	GSE37350	Homer	CCWGGAATGY	1	0.3767	64	0.1888	7866	0.1626	7.17274
C3	Early-down	FOXA1	Forkhead	LNCAP-FOXA1-ChIP-Seq	GSE27824	Homer	WAAGTAAACA	1	0.3767	82	0.2419	10309.3	0.2132	6.33753
C3	Early-down	FOXM1	Forkhead	MCF7-FOXM1-ChIP-Seq	GSE72977	Homer	TRTTTACTTW	1	0.3767	74	0.2183	9222.8	0.1907	7.164
C3	Early-down	Bapx1	Homeobox	VertebralCol-Bapx1-ChIP-Seq	GSE36672	Homer	TTRAGTGSYK	1	0.3767	158	0.4661	20888.2	0.4319	6.03763
C3	Early-down	CTCF	Zf	CD4+-CTCF-ChIP-Seq	Barski_et_al.	Homer	AYAGTGCCMYCTRGTGGCCA	1	0.3767	18	0.0531	1873.1	0.0387	8.70484
C3	Early-down	Foxa2	Forkhead	Liver-Foxa2-ChIP-Seq	GSE25694	Homer	CYTGTTTACWYW	1	0.4211	54	0.1593	6609.3	0.1367	6.53541
C3	Early-down	Lhx1	Homeobox	EmbryoCarcinoma-Lhx1-ChIP-Seq	GSE70957	Homer	NNYTAATTAR	1	0.4256	67	0.1976	8372.4	0.1731	5.97818
C3	Early-down	Pdx1	Homeobox	Islet-Pdx1-ChIP-Seq	SRA008281	Homer	YCATYAATCA	1	0.4256	60	0.177	7426.6	0.1536	5.93226
C3	Early-down	Tgif2	Homeobox	mES-Tgif2-ChIP-Seq	GSE55404	Homer	TGTCANYT	1	0.4256	206	0.6077	27869.5	0.5762	5.21446
C3	Early-down	Zic	Zf	Cerebellum-ZIC1.2-ChIP-Seq	GSE60731	Homer	CCTGCTGAGH	1	0.4475	82	0.2419	10464.4	0.2164	7.26844
C3	Early-down	HOXB13	Homeobox	ProstateTumor-HOXB13-ChIP-Seq	GSE56288	Homer	TTTTATKRGG	1	0.4475	68	0.2006	8556.8	0.1769	4.26957
C3	Early-down	Znf263	Zf	K562-Znf263-ChIP-Seq	GSE31477	Homer	CVGTSCTCCC	1	0.4475	163	0.4808	21790	0.4505	3.87722
C3	Early-down	c-Myc	bHLH	LNCAP-cMyc-ChIP-Seq	Unpublished	Homer	VCCACGTG	1	0.4537	48	0.1416	5873.4	0.1214	6.6135
C3	Early-down	PR	NR	T47D-PR-ChIP-Seq	GSE31130	Homer	VAGRACAKNCTGTBC	1	0.4537	159	0.469	21242.8	0.4392	5.62734
C3	Early-down	TEAD3	TEA	HepG2-TEAD3-ChIP-Seq	Encode	Homer	TRCATTCCAG	1	0.4537	79	0.233	10085.4	0.2085	5.85698
C3	Early-down	TEAD	TEA	Fibroblast-PU.1-ChIP-Seq	Unpublished	Homer	YCWGGAATGY	1	0.4551	47	0.1386	5752.3	0.1189	8.29002
C3	Early-down	ZNF264	Zf	HEK293-ZNF264.GFP-ChIP-Seq	GSE58341	Homer	RGGGCACTAACY	1	0.4649	61	0.1799	7655.7	0.1583	6.82124
C3	Early-down	EBF1	EBF	Near-E2A-ChIP-Seq	GSE21512	Homer	GTCCCCWGGGGA	1	0.4791	95	0.2802	12344	0.2552	6.75203
C3	Early-down	E-box	bHLH	Promoter	NA	Homer	SSGGTCACGTGA	1	0.4794	10	0.0295	990.9	0.0205	8.81622
C3	Early-down	USF1	bHLH	GM12878-Usf1-ChIP-Seq	GSE32465	Homer	SGTCACGTGR	1	0.5014	40	0.118	4883	0.101	6.62948
C3	Early-down	EBF2	EBF	BrownAdipose-EBF2-ChIP-Seq	GSE97114	Homer	NABTCCCWDGGGAVH	1	0.5059	78	0.2301	10052.1	0.2078	6.63664
C3	Early-down	ZNF669	Zf	HEK293-ZNF669.GFP-ChIP-Seq	GSE58341	Homer	GARTGGTCATCGCCC	1	0.5074	9	0.0265	887.1	0.0183	8.24108
C3	Early-down	Zfp57	Zf	H1-ZFP57.HA-ChIP-Seq	GSE115387	Homer	NANTGCSGCA	1	0.542	50	0.1475	6282.5	0.1299	6.37386
C3	Early-down	PU.1-IRF	ETS:IRF	Bcell-PU.1-ChIP-Seq	GSE21512	Homer	MGGAAGTGAAAC	1	0.542	100	0.295	13164.3	0.2722	6.85196
C3	Early-down	Tbx20	T-box	Heart-Tbx20-ChIP-Seq	GSE29636	Homer	GGTGYTGACAGS	1	0.544	21	0.0619	2428.3	0.0502	8.53871
C3	Early-down	KLF3	Zf	MEF-Klf3-ChIP-Seq	GSE44748	Homer	NRGCCCCRCCCHBNN	1	0.544	69	0.2035	8888.2	0.1838	5.50528
C3	Early-down	FOXK1	Forkhead	HEK293-FOXK1-ChIP-Seq	GSE51673	Homer	NVWTGTTTAC	1	0.544	66	0.1947	8482.9	0.1754	6.33705
C3	Early-down	NF1:FOXA1	CTF,Forkhead	LNCAP-FOXA1-ChIP-Seq	GSE27824	Homer	WNTGTTTRYTTTGGCA	1	0.549	5	0.0147	438.3	0.0091	10.2737
C3	Early-down	MITF	bHLH	MastCells-MITF-ChIP-Seq	GSE48085	Homer	RTCATGTGAC	1	0.5517	72	0.2124	9326.7	0.1928	6.35457
C3	Early-down	Bcl11a	Zf	HSPC-BCL11A-ChIP-Seq	GSE104676	Homer	TYTGACCASWRG	1	0.555	56	0.1652	7141.5	0.1477	7.30715
C3	Early-down	ZSCAN22	Zf	HEK293-ZSCAN22.GFP-ChIP-Seq	GSE58341	Homer	SMCAGTCWGAKGGAGGAGGC	1	0.5561	9	0.0265	922.1	0.0191	10.1568
C3	Early-down	Hoxa9	Homeobox	ChickenMSG-Hoxa9.Flag-ChIP-Seq	GSE86088	Homer	RGCAATNAAA	1	0.5673	160	0.472	21692.3	0.4485	5.52419
C3	Early-down	Oct2	POU,Homeobox	Bcell-Oct2-ChIP-Seq	GSE21512	Homer	ATATGCAAAT	1	0.5779	19	0.056	2211.3	0.0457	7.58112
C3	Early-down	E2F6	E2F	Hela-E2F6-ChIP-Seq	GSE31477	Homer	GGCGGGAARN	1	0.5787	65	0.1917	8420.5	0.1741	7.14891
C3	Early-down	ZNF416	Zf	HEK293-ZNF416.GFP-ChIP-Seq	GSE58341	Homer	WDNCTGGGCA	1	0.5876	114	0.3363	15251	0.3153	7.03014
C3	Early-down	Tbox:Smad	T-box,MAD	ESCd5-Smad2_3-ChIP-Seq	GSE29422	Homer	AGGTGHCAGACA	1	0.5876	17	0.0501	1962.3	0.0406	8.77668
C3	Early-down	Nanog	Homeobox	mES-Nanog-ChIP-Seq	GSE11724	Homer	RGCCATTAAC	1	0.5876	232	0.6844	32072.7	0.6631	4.45706
C3	Early-down	Pit1+1bp	Homeobox	GCrat-Pit1-ChIP-Seq	GSE58009	Homer	ATGCATAATTCA	1	0.5876	20	0.059	2358	0.0488	7.33824
C3	Early-down	TATA-Box	TBP	Promoter	NA	Homer	CCTTTTAWAGSC	1	0.589	86	0.2537	11362.9	0.2349	5.68259
C3	Early-down	Pknox1	Homeobox	ES-Prep1-ChIP-Seq	GSE63282	Homer	SCTGTCAVTCAV	1	0.5918	21	0.0619	2500.7	0.0517	8.29962
C3	Early-down	GATA:SCL	Zf,bHLH	Ter119-SCL-ChIP-Seq	GSE18720	Homer	CRGCTGBNGNSNNSAGATAA	1	0.5918	10	0.0295	1078.4	0.0223	8.5623
C3	Early-down	Meis1	Homeobox	MastCells-Meis1-ChIP-Seq	GSE48085	Homer	VGCTGWCAVB	1	0.5918	130	0.3835	17538.2	0.3626	6.3078
C3	Early-down	FOXK2	Forkhead	U2OS-FOXK2-ChIP-Seq	E-MTAB-2204	Homer	SCHTGTTTACAT	1	0.5938	41	0.1209	5193	0.1074	7.29725
C3	Early-down	Brn1	POU,Homeobox	NPC-Brn1-ChIP-Seq	GSE35496	Homer	TATGCWAATBAV	1	0.6111	21	0.0619	2524.3	0.0522	8.42113
C3	Early-down	Zic3	Zf	mES-Zic3-ChIP-Seq	GSE37889	Homer	GGCCYCCTGCTGDGH	1	0.6111	63	0.1858	8229.1	0.1701	7.88465
C3	Early-down	IRF8	IRF	BMDM-IRF8-ChIP-Seq	GSE77884	Homer	GRAASTGAAAST	1	0.6111	24	0.0708	2924.6	0.0605	8.61756
C3	Early-down	THRb	NR	HepG2-THRb.Flag-ChIP-Seq	Encode	Homer	GGTCACCTGAGGTCA	1	0.6111	51	0.1504	6583	0.1361	7.16567
C3	Early-down	ZNF189	Zf	HEK293-ZNF189.GFP-ChIP-Seq	GSE58341	Homer	TGGAACAGMA	1	0.6111	70	0.2065	9212.6	0.1905	7.11928
C3	Early-down	Mef2c	MADS	GM12878-Mef2c-ChIP-Seq	GSE32465	Homer	DCYAAAAATAGM	1	0.6117	25	0.0737	3070.4	0.0635	7.87448
C3	Early-down	Mef2d	MADS	Retina-Mef2d-ChIP-Seq	GSE61391	Homer	GCTATTTTTAGC	1	0.6237	11	0.0324	1237.4	0.0256	8.64724
C3	Early-down	SpiB	ETS	OCILY3-SPIB-ChIP-Seq	GSE56857	Homer	AAAGRGGAAGTG	1	0.6237	19	0.056	2284.8	0.0472	8.85312
C3	Early-down	bZIP:IRF	bZIP,IRF	Th17-BatF-ChIP-Seq	GSE39756	Homer	NAGTTTCABTHTGACTNW	1	0.6237	32	0.0944	4031.1	0.0833	8.08507
C3	Early-down	CEBP:AP1	bZIP	ThioMac-CEBPb-ChIP-Seq	GSE21512	Homer	DRTGTTGCAA	1	0.6246	45	0.1327	5806.1	0.12	6.42862
C3	Early-down	p63	p53	Keratinocyte-p63-ChIP-Seq	GSE17611	Homer	NNDRCATGYCYNRRCATGYH	1	0.6428	31	0.0914	3920	0.081	6.98559
C3	Early-down	Tbx21	T-box	GM12878-TBX21-ChIP-Seq	Encode	Homer	AGGTGTGAAA	1	0.6428	64	0.1888	8454.4	0.1748	6.62472
C3	Early-down	WT1	Zf	Kidney-WT1-ChIP-Seq	GSE90016	Homer	MCTCCCMCRCAB	1	0.6478	68	0.2006	9020.2	0.1865	7.71093
C3	Early-down	CLOCK	bHLH	Liver-Clock-ChIP-Seq	GSE39860	Homer	GHCACGTG	1	0.649	45	0.1327	5847.8	0.1209	6.34007
C3	Early-down	PRDM15	Zf	ESC-Prdm15-ChIP-Seq	GSE73694	Homer	YCCDNTCCAGGTTTT	1	0.657	82	0.2419	10992.2	0.2273	6.4143
C3	Early-down	Tcfcp2l1	CP2	mES-Tcfcp2l1-ChIP-Seq	GSE11431	Homer	NRAACCRGTTYRAACCRGYT	1	0.6625	15	0.0442	1799.8	0.0372	8.04087
C3	Early-down	Cux2	Homeobox	Liver-Cux2-ChIP-Seq	GSE35985	Homer	HNRAATCAAT	1	0.6625	26	0.0767	3276.2	0.0677	6.35909
C3	Early-down	FoxL2	Forkhead	Ovary-FoxL2-ChIP-Seq	GSE60858	Homer	WWTRTAAACAVG	1	0.6674	53	0.1563	6986.8	0.1445	6.23236
C3	Early-down	Foxa3	Forkhead	Liver-Foxa3-ChIP-Seq	GSE77670	Homer	BSNTGTTTACWYWGN	1	0.6674	20	0.059	2476.8	0.0512	8.40103
C3	Early-down	IRF:BATF	IRF:bZIP	pDC-Irf8-ChIP-Seq	GSE66899	Homer	CTTTCANTATGACTV	1	0.6701	8	0.0236	894.5	0.0185	9.61967
C3	Early-down	HOXA2	Homeobox	mES-Hoxa2-ChIP-Seq	Donaldson_et_al.	Homer	GYCATCMATCAT	1	0.6701	8	0.0236	895.2	0.0185	9.38885
C3	Early-down	ETS:E-box	ETS,bHLH	HPC7-Scl-ChIP-Seq	GSE22178	Homer	AGGAARCAGCTG	1	0.6724	8	0.0236	898.2	0.0186	10.0153
C3	Early-down	ZNF768	Zf	Rajj-ZNF768-ChIP-Seq	GSE111879	Homer	RHHCAGAGAGGB	1	0.6724	4	0.0118	393.4	0.0081	9.65865
C3	Early-down	Sp1	Zf	Promoter	NA	Homer	GGCCCCGCCCCC	1	0.6724	50	0.1475	6597.4	0.1364	8.68507
C3	Early-down	HLF	bZIP	HSC-HLF.Flag-ChIP-Seq	GSE69817	Homer	RTTATGYAAB	1	0.6785	44	0.1298	5782.6	0.1196	6.20931
C3	Early-down	Oct4	POU,Homeobox	mES-Oct4-ChIP-Seq	GSE11431	Homer	ATTTGCATAW	1	0.6785	28	0.0826	3588.4	0.0742	7.32558
C3	Early-down	LXRE	NR,DR4	RAW-LXRb.biotin-ChIP-Seq	GSE21512	Homer	RGGTTACTANAGGTCA	1	0.686	4	0.0118	401.2	0.0083	9.09992
C3	Early-down	Srebp1a	bHLH	HepG2-Srebp1a-ChIP-Seq	GSE31477	Homer	RTCACSCCAY	1	0.686	16	0.0472	1973.1	0.0408	7.91168
C3	Early-down	FOXA1	Forkhead	MCF7-FOXA1-ChIP-Seq	GSE26831	Homer	WAAGTAAACA	1	0.6866	64	0.1888	8584.5	0.1775	6.56811
C3	Early-down	Hnf6b	Homeobox	LNCaP-Hnf6b-ChIP-Seq	GSE106305	Homer	TATTGAYY	1	0.6866	49	0.1445	6501	0.1344	6.25467
C3	Early-down	TFE3	bHLH	MEF-TFE3-ChIP-Seq	GSE75757	Homer	GTCACGTGACYV	1	0.6866	8	0.0236	917.8	0.019	8.32268
C3	Early-down	HNF6	Homeobox	Liver-Hnf6-ChIP-Seq	ERP000394	Homer	NTATYGATCH	1	0.6866	31	0.0914	4022.1	0.0832	4.57375
C3	Early-down	Stat3+il21	Stat	CD4-Stat3-ChIP-Seq	GSE19198	Homer	SVYTTCCNGGAARB	1	0.6866	52	0.1534	6924.4	0.1432	6.74705
C3	Early-down	ZNF317	Zf	HEK293-ZNF317.GFP-ChIP-Seq	GSE58341	Homer	GTCWGCTGTYYCTCT	1	0.689	7	0.0206	793.3	0.0164	9.52519
C3	Early-down	Tbr1	T-box	Cortex-Tbr1-ChIP-Seq	GSE71384	Homer	AAGGTGTKAA	1	0.7041	86	0.2537	11717.2	0.2423	6.12153
C3	Early-down	Dlx3	Homeobox	Kerainocytes-Dlx3-ChIP-Seq	GSE89884	Homer	NDGTAATTAC	1	0.7091	36	0.1062	4748.9	0.0982	5.57497
C3	Early-down	NFkB-p50,p52	RHD	Monocyte-p50-ChIP-Chip	Schreiber_et_al.	Homer	GGGGGAATCCCC	1	0.7092	11	0.0324	1336	0.0276	8.67192
C3	Early-down	p53	p53	mES-cMyc-ChIP-Seq	GSE11431	Homer	ACATGCCCGGGCAT	1	0.7092	2	0.0059	171.9	0.0036	11.0481
C3	Early-down	ZNF519	Zf	HEK293-ZNF519.GFP-ChIP-Seq	GSE58341	Homer	GAGSCCGAGC	1	0.7137	31	0.0914	4076	0.0843	7.96525
C3	Early-down	Foxf1	Forkhead	Lung-Foxf1-ChIP-Seq	GSE77951	Homer	WWATRTAAACAN	1	0.725	56	0.1652	7568	0.1565	6.34862
C3	Early-down	Atf4	bZIP	MEF-Atf4-ChIP-Seq	GSE35681	Homer	MTGATGCAAT	1	0.725	15	0.0442	1894.3	0.0392	6.54
C3	Early-down	ZNF143|STAF	Zf	CUTLL-ZNF143-ChIP-Seq	GSE29600	Homer	ATTTCCCAGVAKSCY	1	0.7269	33	0.0973	4374	0.0904	8.6236
C3	Early-down	OCT4-SOX2-TCF-NANOG	POU,Homeobox,HMG	mES-Oct4-ChIP-Seq	GSE11431	Homer	ATTTGCATAACAATG	1	0.7269	11	0.0324	1357.3	0.0281	8.75142
C3	Early-down	Tcf7	HMG	GM12878-TCF7-ChIP-Seq	Encode	Homer	CTTTGATGTGSB	1	0.7269	24	0.0708	3133.6	0.0648	8.21097
C3	Early-down	RUNX	Runt	HPC7-Runx1-ChIP-Seq	GSE22178	Homer	SAAACCACAG	1	0.729	54	0.1593	7313.5	0.1512	6.62587
C3	Early-down	Foxo3	Forkhead	U2OS-Foxo3-ChIP-Seq	E-MTAB-2701	Homer	DGTAAACA	1	0.7406	44	0.1298	5933.6	0.1227	4.67304
C3	Early-down	Foxh1	Forkhead	hESC-FOXH1-ChIP-Seq	GSE29422	Homer	NNTGTGGATTSS	1	0.7435	38	0.1121	5103.1	0.1055	7.15123
C3	Early-down	FOXA1:AR	Forkhead,NR	LNCAP-AR-ChIP-Seq	GSE27824	Homer	AGTAAACAAAAAAGAACAND	1	0.7435	7	0.0206	838.3	0.0173	10.6039
C3	Early-down	DUX4	Homeobox	Myoblasts-DUX4.V5-ChIP-Seq	GSE75791	Homer	NWTAAYCYAATCAWN	1	0.7435	3	0.0088	312.1	0.0065	10.3594
C3	Early-down	CUX1	Homeobox	K562-CUX1-ChIP-Seq	GSE92882	Homer	TATCGATNAN	1	0.7435	38	0.1121	5113.5	0.1057	6.16664
C3	Early-down	STAT5	Stat	mCD4+-Stat5-ChIP-Seq	GSE12346	Homer	RTTTCTNAGAAA	1	0.7457	23	0.0678	3034.6	0.0627	6.28542
C3	Early-down	NFkB-p65-Rel	RHD	ThioMac-LPS-Expression	GSE23622	Homer	GGAAATTCCC	1	0.7699	4	0.0118	454.9	0.0094	9.2299
C3	Early-down	Pitx1:Ebox	Homeobox,bHLH	Hindlimb-Pitx1-ChIP-Seq	GSE41591	Homer	YTAATTRAWWCCAGATGT	1	0.7742	11	0.0324	1405.8	0.0291	8.90411
C3	Early-down	NRF	NRF	Promoter	NA	Homer	STGCGCATGCGC	1	0.7742	28	0.0826	3761.4	0.0778	1.45717
C3	Early-down	AR-halfsite	NR	LNCaP-AR-ChIP-Seq	GSE27824	Homer	CCAGGAACAG	1	0.7742	242	0.7139	34139.4	0.7059	5.19383
C3	Early-down	Chop	bZIP	MEF-Chop-ChIP-Seq	GSE35681	Homer	ATTGCATCAT	1	0.7914	11	0.0324	1421.9	0.0294	7.62649
C3	Early-down	HIF-1b	HLH	T47D-HIF1b-ChIP-Seq	GSE59937	Homer	RTACGTGC	1	0.7926	92	0.2714	12815	0.265	5.71312
C3	Early-down	Nkx2.5	Homeobox	HL1-Nkx2.5.biotin-ChIP-Seq	GSE21529	Homer	RRSCACTYAA	1	0.7926	152	0.4484	21335.1	0.4411	5.89817
C3	Early-down	ZNF341	Zf	EBV-ZNF341-ChIP-Seq	GSE113194	Homer	GGAACAGCCG	1	0.7938	65	0.1917	9011.1	0.1863	7.22693
C3	Early-down	Pitx1	Homeobox	Chicken-Pitx1-ChIP-Seq	GSE38910	Homer	TAATCCCN	1	0.7938	220	0.649	31058.2	0.6422	4.69519
C3	Early-down	HNF1b	Homeobox	PDAC-HNF1B-ChIP-Seq	GSE64557	Homer	GTTAATNATTAA	1	0.8093	7	0.0206	890.3	0.0184	8.55189
C3	Early-down	Lhx2	Homeobox	HFSC-Lhx2-ChIP-Seq	GSE48068	Homer	TAATTAGN	1	0.8093	59	0.174	8196	0.1695	6.1087
C3	Early-down	RUNX2	Runt	PCa-RUNX2-ChIP-Seq	GSE33889	Homer	NWAACCACADNN	1	0.8093	61	0.1799	8479.6	0.1753	7.6722
C3	Early-down	EBF	EBF	proBcell-EBF-ChIP-Seq	GSE21978	Homer	DGTCCCYRGGGA	1	0.8093	17	0.0501	2284.1	0.0472	8.59001
C3	Early-down	PRDM1	Zf	Hela-PRDM1-ChIP-Seq	GSE31477	Homer	ACTTTCACTTTC	1	0.8093	38	0.1121	5241.3	0.1084	7.91277
C3	Early-down	Mef2b	MADS	HEK293-Mef2b.V5-ChIP-Seq	GSE67450	Homer	GCTATTTTTGGM	1	0.8093	45	0.1327	6235.1	0.1289	6.85072
C3	Early-down	Klf4	Zf	mES-Klf4-ChIP-Seq	GSE11431	Homer	GCCACACCCA	1	0.8155	42	0.1239	5824	0.1204	7.33396
C3	Early-down	GRHL2	CP2	HBE-GRHL2-ChIP-Seq	GSE46194	Homer	AAACYKGTTWDACMRGTTTB	1	0.8155	26	0.0767	3567.3	0.0738	6.95492
C3	Early-down	Zfp809	Zf	ES-Zfp809-ChIP-Seq	GSE70799	Homer	GGGGCTYGKCTGGGA	1	0.8246	22	0.0649	3017.8	0.0624	9.01233
C3	Early-down	ERE	NR,IR3	MCF7-ERa-ChIP-Seq	Unpublished	Homer	VAGGTCACNSTGACC	1	0.8246	21	0.0619	2878.9	0.0595	7.66658
C3	Early-down	Nkx3.1	Homeobox	LNCaP-Nkx3.1-ChIP-Seq	GSE28264	Homer	AAGCACTTAA	1	0.8292	155	0.4572	21920	0.4532	5.53405
C3	Early-down	FOXP1	Forkhead	H9-FOXP1-ChIP-Seq	GSE31006	Homer	NYYTGTTTACHN	1	0.8292	26	0.0767	3595.1	0.0743	7.72718
C3	Early-down	TEAD2	TEA	Py2T-Tead2-ChIP-Seq	GSE55709	Homer	CCWGGAATGY	1	0.8292	35	0.1032	4872.4	0.1007	7.34798
C3	Early-down	Hoxb4	Homeobox	ES-Hoxb4-ChIP-Seq	GSE34014	Homer	TGATTRATGGCY	1	0.8318	12	0.0354	1626.2	0.0336	7.99284
C3	Early-down	E2F7	E2F	Hela-E2F7-ChIP-Seq	GSE32673	Homer	VDTTTCCCGCCA	1	0.8449	14	0.0413	1920.2	0.0397	8.69074
C3	Early-down	ZNF16	Zf	HEK293-ZNF16.GFP-ChIP-Seq	GSE58341	Homer	MACCTTCYATGGCTCCCTAKTGCCY	1	0.8449	1	0.0029	93.9	0.0019	9.5569
C3	Early-down	PAX5	Paired,Homeobox,condensed	GM12878-PAX5-ChIP-Seq	GSE32465	Homer	GTCACGCTCSCTGM	1	0.8483	9	0.0265	1221.8	0.0253	8.4801
C3	Early-down	ZNF382	Zf	HEK293-ZNF382.GFP-ChIP-Seq	GSE58341	Homer	GNCTGTASTRNTGBCTCHTT	1	0.8495	2	0.0059	234.8	0.0049	10.5743
C3	Early-down	GATA3	Zf,DR4	iTreg-Gata3-ChIP-Seq	GSE20898	Homer	AGATGKDGAGATAAG	1	0.8495	5	0.0147	657.7	0.0136	8.17976
C3	Early-down	Arnt:Ahr	bHLH	MCF7-Arnt-ChIP-Seq	Lo_et_al.	Homer	TBGCACGCAA	1	0.8573	57	0.1681	8069.1	0.1668	6.1015
C3	Early-down	Lhx3	Homeobox	Neuron-Lhx3-ChIP-Seq	GSE31456	Homer	ADBTAATTAR	1	0.8573	90	0.2655	12774.7	0.2641	5.12751
C3	Early-down	EKLF	Zf	Erythrocyte-Klf1-ChIP-Seq	GSE20478	Homer	NWGGGTGTGGCY	1	0.8573	18	0.0531	2519.4	0.0521	9.25088
C3	Early-down	RORgt	NR	EL4-RORgt.Flag-ChIP-Seq	GSE56019	Homer	AAYTAGGTCA	1	0.8573	8	0.0236	1094.6	0.0226	8.64571
C3	Early-down	RORgt	NR	EL4-RORgt.Flag-ChIP-Seq	GSE56019	Homer	AAYTAGGTCA	1	0.8573	8	0.0236	1094.6	0.0226	8.64571
C3	Early-down	RORgt	NR	EL4-RORgt.Flag-ChIP-Seq	GSE56019	Homer	AAYTAGGTCA	1	0.8573	8	0.0236	1094.6	0.0226	8.64571
C3	Early-down	RORgt	NR	EL4-RORgt.Flag-ChIP-Seq	GSE56019	Homer	AAYTAGGTCA	1	0.8573	8	0.0236	1094.6	0.0226	8.64571
C3	Early-down	E2F	E2F	Hela-CellCycle-Expression	NA	Homer	TTSGCGCGAAAA	1	0.8639	6	0.0177	817.5	0.0169	8.4865
C3	Early-down	p53	p53	Saos-p53-ChIP-Seq	GSE15780	Homer	RRCATGYCYRGRCATGYYYN	1	0.877	7	0.0206	972	0.0201	8.59219
C3	Early-down	p53	p53	Saos-p53-ChIP-Seq	NA	Homer	RRCATGYCYRGRCATGYYYN	1	0.877	7	0.0206	972	0.0201	8.59219
C3	Early-down	PAX5	Paired,Homeobox	GM12878-PAX5-ChIP-Seq	GSE32465	Homer	GCAGCCAAGCRTGACH	1	0.8854	33	0.0973	4713.4	0.0975	7.20944
C3	Early-down	HIF2a	bHLH	785_O-HIF2a-ChIP-Seq	GSE34871	Homer	GCACGTACCC	1	0.8933	27	0.0796	3865.2	0.0799	6.74272
C3	Early-down	Tbx5	T-box	HL1-Tbx5.biotin-ChIP-Seq	GSE21529	Homer	AGGTGTCA	1	0.8933	201	0.5929	28719.6	0.5938	5.41231
C3	Early-down	RORg	NR	Liver-Rorc-ChIP-Seq	GSE101115	Homer	WAABTAGGTCAV	1	0.8933	5	0.0147	694.5	0.0144	9.09674
C3	Early-down	ZNF692	Zf	HEK293-ZNF692.GFP-ChIP-Seq	GSE58341	Homer	GTGGGCCCCA	1	0.896	12	0.0354	1716.7	0.0355	8.1892
C3	Early-down	GFY	?	Promoter	NA	Homer	ACTACAATTCCC	1	0.8975	5	0.0147	702.5	0.0145	9.37784
C3	Early-down	HOXA1	Homeobox	mES-Hoxa1-ChIP-Seq	SRP084292	Homer	TGATKGATGR	1	0.8993	15	0.0442	2158.2	0.0446	8.01907
C3	Early-down	CHR	?	Hela-CellCycle-Expression	NA	Homer	SRGTTTCAAA	1	0.8993	33	0.0973	4755.8	0.0983	7.76332
C3	Early-down	NFAT:AP1	RHD,bZIP	Jurkat-NFATC1-ChIP-Seq	Jolma_et_al.	Homer	SARTGGAAAAWRTGAGTCAB	1	0.8993	9	0.0265	1292.6	0.0267	8.95086
C3	Early-down	FoxD3	forkhead	ZebrafishEmbryo-Foxd3.biotin-ChIP-seq	GSE106676	Homer	TGTTTAYTTAGC	1	0.9109	54	0.1593	7802.4	0.1613	7.33682
C3	Early-down	FXR	NR,IR1	Liver-FXR-ChIP-Seq	Chong_et_al.	Homer	AGGTCANTGACCTB	1	0.9323	28	0.0826	4087.5	0.0845	6.87316
C3	Early-down	CEBP	bZIP	ThioMac-CEBPb-ChIP-Seq	GSE21512	Homer	ATTGCGCAAC	1	0.9347	33	0.0973	4818.4	0.0996	6.12841
C3	Early-down	Bach2	bZIP	OCILy7-Bach2-ChIP-Seq	GSE44420	Homer	TGCTGAGTCA	1	0.9365	12	0.0354	1768.3	0.0366	8.69735
C3	Early-down	IRF1	IRF	PBMC-IRF1-ChIP-Seq	GSE43036	Homer	GAAAGTGAAAGT	1	0.9573	8	0.0236	1195.7	0.0247	9.68899
C3	Early-down	Reverb	NR,DR2	RAW-Reverba.biotin-ChIP-Seq	GSE45914	Homer	GTRGGTCASTGGGTCA	1	0.96	9	0.0265	1348.9	0.0279	8.70919
C3	Early-down	HINFP	Zf	K562-HINFP.eGFP-ChIP-Seq	Encode	Homer	TWVGGTCCGC	1	0.9605	39	0.115	5740.7	0.1187	6.66582
C3	Early-down	Nkx6.1	Homeobox	Islet-Nkx6.1-ChIP-Seq	GSE40975	Homer	GKTAATGR	1	0.967	129	0.3805	18706	0.3868	4.63307
C3	Early-down	p73	p53	Trachea-p73-ChIP-Seq	PRJNA310161	Homer	NRRRCAWGTCCDGRCATGYY	1	0.982	3	0.0088	459.8	0.0095	9.65302
C3	Early-down	GATA3	Zf,DR8	iTreg-Gata3-ChIP-Seq	GSE20898	Homer	AGATSTNDNNDSAGATAASN	1	0.9887	5	0.0147	773.6	0.016	9.25002
C3	Early-down	PU.1:IRF8	ETS:IRF	pDC-Irf8-ChIP-Seq	GSE66899	Homer	GGAAGTGAAAST	1	0.9937	11	0.0324	1686.1	0.0349	8.98699
C3	Early-down	Egr2	Zf	Thymocytes-Egr2-ChIP-Seq	GSE34254	Homer	NGCGTGGGCGGR	1	0.9953	23	0.0678	3471.4	0.0718	9.1687
C3	Early-down	PRDM10	Zf	HEK293-PRDM10.eGFP-ChIP-Seq	Encode	Homer	TGGTACATTCCA	1	0.9961	42	0.1239	6259.2	0.1294	7.35354
C3	Early-down	THRa	NR	C17.2-THRa-ChIP-Seq	GSE38347	Homer	GGTCANYTGAGGWCA	1	0.9961	29	0.0855	4360.9	0.0902	7.77288
C3	Early-down	Phox2a	Homeobox	Neuron-Phox2a-ChIP-Seq	GSE31456	Homer	YTAATYNRATTA	1	1	16	0.0472	2457.5	0.0508	7.17589
C3	Early-down	Stat3	Stat	mES-Stat3-ChIP-Seq	GSE11431	Homer	CTTCCGGGAA	1	1	34	0.1003	5125.8	0.106	7.06388
C3	Early-down	Twist	bHLH	HMLE-TWIST1-ChIP-Seq	Chang_et_al	Homer	VCAKCTGGNNNCCAGMTGBN	1	1	9	0.0265	1413.3	0.0292	9.10017
C3	Early-down	Hand2	bHLH	Mesoderm-Hand2-ChIP-Seq	GSE61475	Homer	TGACANARRCCAGRC	1	1	33	0.0973	4982.3	0.103	8.40959
C3	Early-down	MafK	bZIP	C2C12-MafK-ChIP-Seq	GSE36030	Homer	GCTGASTCAGCA	1	1	17	0.0501	2626.2	0.0543	8.22154
C3	Early-down	GATA3	Zf	iTreg-Gata3-ChIP-Seq	GSE20898	Homer	AGATAASR	1	1	79	0.233	11744.9	0.2428	5.93828
C3	Early-down	EBNA1	EBV-virus	Raji-EBNA1-ChIP-Seq	GSE30709	Homer	GGYAGCAYDTGCTDCCCNNN	1	1	1	0.0029	166.1	0.0034	11.187
C3	Early-down	Bcl6	Zf	Liver-Bcl6-ChIP-Seq	GSE31578	Homer	NNNCTTTCCAGGAAA	1	1	90	0.2655	13361.1	0.2763	6.52264
C3	Early-down	Mef2a	MADS	HL1-Mef2a.biotin-ChIP-Seq	GSE21529	Homer	CYAAAAATAG	1	1	19	0.056	2975.9	0.0615	7.66895
C3	Early-down	PAX3:FKHR-fusion	Paired,Homeobox	Rh4-PAX3:FKHR-ChIP-Seq	GSE19063	Homer	ACCRTGACTAATTNN	1	1	11	0.0324	1766.7	0.0365	7.41361
C3	Early-down	PGR	NR	EndoStromal-PGR-ChIP-Seq	GSE69539	Homer	AAGAACATWHTGTTC	1	1	13	0.0383	2072.7	0.0429	7.11747
C3	Early-down	E2F1	E2F	Hela-E2F1-ChIP-Seq	GSE22478	Homer	CWGGCGGGAA	1	1	27	0.0796	4183.4	0.0865	7.5313
C3	Early-down	MafF	bZIP	HepG2-MafF-ChIP-Seq	GSE31477	Homer	HWWGTCAGCAWWTTT	1	1	13	0.0383	2082.3	0.0431	8.35902
C3	Early-down	Ets1-distal	ETS	CD4+-PolII-ChIP-Seq	Barski_et_al.	Homer	MACAGGAAGT	1	1	19	0.056	3006.5	0.0622	8.63796
C3	Early-down	E2F4	E2F	K562-E2F4-ChIP-Seq	GSE31477	Homer	GGCGGGAAAH	1	1	45	0.1327	6879	0.1422	6.58096
C3	Early-down	PSE	SNAPc	K562-mStart-Seq	NA	Homer	WAVTCACCMTAASYDAAAAG	1	1	30	0.0885	4660.2	0.0964	7.0549
C3	Early-down	YY1	Zf	Promoter	NA	Homer	CAAGATGGCGGC	1	1	8	0.0236	1333.8	0.0276	8.7834
C3	Early-down	CEBP:CEBP	bZIP	MEF-Chop-ChIP-Seq	GSE35681	Homer	NTNATGCAAYMNNHTGMAAY	1	1	6	0.0177	1027.1	0.0212	9.05353
C3	Early-down	ZNF322	Zf	HEK293-ZNF322.GFP-ChIP-Seq	GSE58341	Homer	GAGCCTGGTACTGWGCCTGR	1	1	23	0.0678	3649.2	0.0755	8.91909
C3	Early-down	AP-2alpha	AP2	Hela-AP2alpha-ChIP-Seq	GSE31477	Homer	ATGCCCTGAGGC	1	1	73	0.2153	11034.5	0.2281	6.80067
C3	Early-down	ZNF652	NA	HepG2-ZNF652.Flag-ChIP-Seq	Encode	Homer	TTAACCCTTTVNKKN	1	1	12	0.0354	1978.8	0.0409	7.87742
C3	Early-down	Duxbl	Homeobox	NIH3T3-Duxbl.HA-ChIP-Seq	GSE119782	Homer	TAAYCYAATCAA	1	1	3	0.0088	543.4	0.0112	8.8731
C3	Early-down	NPAS	bHLH	Liver-NPAS-ChIP-Seq	GSE39860	Homer	NVCACGTG	1	1	107	0.3156	16037.7	0.3316	5.41316
C3	Early-down	GRE	NR,IR3	RAW264.7-GRE-ChIP-Seq	Unpublished	Homer	VAGRACAKWCTGTYC	1	1	14	0.0413	2329.9	0.0482	7.80986
C3	Early-down	NPAS2	bHLH	Liver-NPAS2-ChIP-Seq	GSE39860	Homer	KCCACGTGAC	1	1	77	0.2271	11716.6	0.2423	6.1426
C3	Early-down	Brachyury	T-box	Mesoendoderm-Brachyury-ChIP-exo	GSE54963	Homer	ANTTMRCASBNNNGTGYKAAN	1	1	15	0.0442	2495.2	0.0516	7.37112
C3	Early-down	IRF2	IRF	Erythroblas-IRF2-ChIP-Seq	GSE36985	Homer	GAAASYGAAASY	1	1	5	0.0147	911.8	0.0189	8.04207
C3	Early-down	Nur77	NR	K562-NR4A1-ChIP-Seq	GSE31363	Homer	TGACCTTTNCNT	1	1	8	0.0236	1406.6	0.0291	8.73646
C3	Early-down	CTCF-SatelliteElement	Zf?	CD4+-CTCF-ChIP-Seq	Barski_et_al.	Homer	TGCAGTTCCMVNWRTGGCCA	1	1	1	0.0029	211.3	0.0044	11.1597
C3	Early-down	Isl1	Homeobox	Neuron-Isl1-ChIP-Seq	GSE31456	Homer	CTAATKGV	1	1	104	0.3068	15693.6	0.3245	5.47186
C3	Early-down	IRF3	IRF	BMDM-Irf3-ChIP-Seq	GSE67343	Homer	AGTTTCAKTTTC	1	1	16	0.0472	2678.8	0.0554	8.90888
C3	Early-down	ZNF165	Zf	WHIM12-ZNF165-ChIP-Seq	GSE65937	Homer	AAGGKGRCGCAGGCA	1	1	11	0.0324	1898.9	0.0393	9.83527
C3	Early-down	PU.1	ETS	ThioMac-PU.1-ChIP-Seq	GSE21512	Homer	AGAGGAAGTG	1	1	32	0.0944	5132	0.1061	7.61317
C3	Early-down	MYB	HTH	ERMYB-Myb-ChIPSeq	GSE22095	Homer	GGCVGTTR	1	1	114	0.3363	17179	0.3552	2.20058
C3	Early-down	BMYB	HTH	Hela-BMYB-ChIP-Seq	GSE27030	Homer	NHAACBGYYV	1	1	94	0.2773	14313.3	0.2959	6.19438
C3	Early-down	GATA	Zf,IR4	iTreg-Gata3-ChIP-Seq	GSE20898	Homer	NAGATWNBNATCTNN	1	1	3	0.0088	602.9	0.0125	9.53762
C3	Early-down	IRF4	IRF	GM12878-IRF4-ChIP-Seq	GSE32465	Homer	ACTGAAACCA	1	1	23	0.0678	3816	0.0789	7.36904
C3	Early-down	ZNF41	Zf	HEK293-ZNF41.GFP-ChIP-Seq	GSE58341	Homer	CCTCATGGTGYCYTWYTCCCTTGTG	1	1	1	0.0029	231.3	0.0048	10.7364
C3	Early-down	Pit1	Homeobox	GCrat-Pit1-ChIP-Seq	GSE58009	Homer	ATGMATATDC	1	1	50	0.1475	7896.5	0.1633	6.40158
C3	Early-down	RUNX-AML	Runt	CD4+-PolII-ChIP-Seq	Barski_et_al.	Homer	GCTGTGGTTW	1	1	44	0.1298	7012.2	0.145	7.38572
C3	Early-down	EWS:ERG-fusion	ETS	CADO_ES1-EWS:ERG-ChIP-Seq	SRA014231	Homer	ATTTCCTGTN	1	1	42	0.1239	6726.2	0.1391	7.33879
C3	Early-down	Tbet	T-box	CD8-Tbet-ChIP-Seq	GSE33802	Homer	AGGTGTGAAM	1	1	58	0.1711	9123	0.1886	6.74206
C3	Early-down	n-Myc	bHLH	mES-nMyc-ChIP-Seq	GSE11431	Homer	VRCCACGTGG	1	1	52	0.1534	8248.8	0.1706	5.71927
C3	Early-down	RXR	NR,DR1	3T3L1-RXR-ChIP-Seq	GSE13511	Homer	TAGGGCAAAGGTCA	1	1	77	0.2271	11962.1	0.2473	6.64118
C3	Early-down	SF1	NR	H295R-Nr5a1-ChIP-Seq	GSE44220	Homer	CAAGGHCANV	1	1	33	0.0973	5410.8	0.1119	6.51408
C3	Early-down	PRDM14	Zf	H1-PRDM14-ChIP-Seq	GSE22767	Homer	RGGTCTCTAACY	1	1	18	0.0531	3099.1	0.0641	7.19447
C3	Early-down	Erra	NR	HepG2-Erra-ChIP-Seq	GSE31477	Homer	CAAAGGTCAG	1	1	150	0.4425	22584.8	0.467	5.74942
C3	Early-down	COUP-TFII	NR	K562-NR2F1-ChIP-Seq	Encode	Homer	GKBCARAGGTCA	1	1	93	0.2743	14356.5	0.2968	6.40604
C3	Early-down	TRPS1	Zf	MCF7-TRPS1-ChIP-Seq	GSE107013	Homer	AGATAAGANN	1	1	100	0.295	15397.6	0.3184	5.50203
C3	Early-down	NFkB-p65	RHD	GM12787-p65-ChIP-Seq	GSE19485	Homer	WGGGGATTTCCC	1	1	28	0.0826	4705.7	0.0973	7.18817
C3	Early-down	GRE	NR,IR3	A549-GR-ChIP-Seq	GSE32465	Homer	NRGVACABNVTGTYCY	1	1	7	0.0206	1374.7	0.0284	7.9144
C3	Early-down	EWS:FLI1-fusion	ETS	SK_N_MC-EWS:FLI1-ChIP-Seq	SRA014231	Homer	VACAGGAAAT	1	1	40	0.118	6566.1	0.1358	4.87542
C3	Early-down	Hnf1	Homeobox	Liver-Foxa2-Chip-Seq	GSE25694	Homer	GGTTAAWCATTAA	1	1	4	0.0118	861.5	0.0178	8.86614
C3	Early-down	PAX6	Paired,Homeobox	Forebrain-Pax6-ChIP-Seq	GSE66961	Homer	NGTGTTCAVTSAAGCGKAAA	1	1	4	0.0118	863.3	0.0178	8.86092
C3	Early-down	TR4	NR,DR1	Hela-TR4-ChIP-Seq	GSE24685	Homer	GAGGTCAAAGGTCA	1	1	6	0.0177	1218.2	0.0252	9.35237
C3	Early-down	AMYB	HTH	Testes-AMYB-ChIP-Seq	GSE44588	Homer	TGGCAGTTGG	1	1	97	0.2861	15077.8	0.3117	5.00906
C3	Early-down	AP-2gamma	AP2	MCF7-TFAP2C-ChIP-Seq	GSE21234	Homer	SCCTSAGGSCAW	1	1	90	0.2655	14120.4	0.292	6.34979
C3	Early-down	SPDEF	ETS	VCaP-SPDEF-ChIP-Seq	SRA014231	Homer	ASWTCCTGBT	1	1	70	0.2065	11178.9	0.2311	6.87195
C3	Early-down	Nr5a2	NR	Pancreas-LRH1-ChIP-Seq	GSE34295	Homer	BTCAAGGTCA	1	1	49	0.1445	8035.6	0.1661	7.02113
C3	Early-down	ISRE	IRF	ThioMac-LPS-Expression	GSE23622	Homer	AGTTTCASTTTC	1	1	2	0.0059	514	0.0106	10.5125
C3	Early-down	Six1	Homeobox	Myoblast-Six1-ChIP-Chip	GSE20150	Homer	GKVTCADRTTWC	1	1	11	0.0324	2109.1	0.0436	8.09506
C3	Early-down	SCRT1	Zf	HEK293-SCRT1.eGFP-ChIP-Seq	Encode	Homer	GCAACAGGTG	1	1	17	0.0501	3110.4	0.0643	6.32471
C3	Early-down	Barx1	Homeobox	Stomach-Barx1.3xFlag-ChIP-Seq	GSE69483	Homer	AAACMATTAN	1	1	21	0.0619	3752.9	0.0776	6.18251
C3	Early-down	Six2	Homeobox	NephronProgenitor-Six2-ChIP-Seq	GSE39837	Homer	GWAAYHTGAKMC	1	1	53	0.1563	8704.3	0.18	6.53718
C3	Early-down	MYNN	Zf	HEK293-MYNN.eGFP-ChIP-Seq	Encode	Homer	TTCAAAWTAAAAGTC	1	1	10	0.0295	2000.1	0.0414	8.24115
C3	Early-down	RORa	NR	Liver-Rora-ChIP-Seq	GSE101115	Homer	AAWCTAGGTCARDNN	1	1	5	0.0147	1136.9	0.0235	9.12099
C3	Early-down	Max	bHLH	K562-Max-ChIP-Seq	GSE31477	Homer	RCCACGTGGYYN	1	1	46	0.1357	7719.7	0.1596	6.60803
C3	Early-down	Eomes	T-box	H9-Eomes-ChIP-Seq	GSE26097	Homer	ATTAACACCT	1	1	113	0.3333	17699.1	0.3659	5.43685
C3	Early-down	PBX2	Homeobox	K562-PBX2-ChIP-Seq	Encode	Homer	RTGATTKATRGN	1	1	39	0.115	6667.9	0.1379	6.66559
C3	Early-down	Gata4	Zf	Heart-Gata4-ChIP-Seq	GSE35151	Homer	NBWGATAAGR	1	1	47	0.1386	7906.7	0.1635	6.51598
C3	Early-down	EAR2	NR	K562-NR2F6-ChIP-Seq	Encode	Homer	NRBCARRGGTCA	1	1	83	0.2448	13358.8	0.2762	6.65536
C3	Early-down	PPARa	NR,DR1	Liver-Ppara-ChIP-Seq	GSE47954	Homer	VNAGGKCAAAGGTCA	1	1	66	0.1947	10837.4	0.2241	7.01326
C3	Early-down	Gata2	Zf	K562-GATA2-ChIP-Seq	GSE18829	Homer	BBCTTATCTS	1	1	29	0.0855	5165.1	0.1068	6.67483
C3	Early-down	ZBTB33	Zf	GM12878-ZBTB33-ChIP-Seq	GSE32465	Homer	GGVTCTCGCGAGAAC	1	1	3	0.0088	794	0.0164	7.64806
C3	Early-down	ETS:RUNX	ETS,Runt	Jurkat-RUNX1-ChIP-Seq	GSE17954	Homer	RCAGGATGTGGT	1	1	4	0.0118	1000.4	0.0207	8.58104
C3	Early-down	GLI3	Zf	Limb-GLI3-ChIP-Chip	GSE11077	Homer	CGTGGGTGGTCC	1	1	6	0.0177	1393	0.0288	8.5549
C3	Early-down	MNT	bHLH	HepG2-MNT-ChIP-Seq	Encode	Homer	DGCACACGTG	1	1	67	0.1976	11093.5	0.2294	4.96758
C3	Early-down	LEF1	HMG	H1-LEF1-ChIP-Seq	GSE64758	Homer	CCTTTGATST	1	1	36	0.1062	6350	0.1313	7.55657
C3	Early-down	Nkx2.2	Homeobox	NPC-Nkx2.2-ChIP-Seq	GSE61673	Homer	BTBRAGTGSN	1	1	126	0.3717	19809.1	0.4096	6.13009
C3	Early-down	Gata6	Zf	HUG1N-GATA6-ChIP-Seq	GSE51936	Homer	YCTTATCTBN	1	1	41	0.1209	7143.7	0.1477	6.28786
C3	Early-down	ZNF415	Zf	HEK293-ZNF415.GFP-ChIP-Seq	GSE58341	Homer	GRTGMTRGAGCC	1	1	42	0.1239	7304.4	0.151	6.9449
C3	Early-down	Esrrb	NR	mES-Esrrb-ChIP-Seq	GSE11431	Homer	KTGACCTTGA	1	1	38	0.1121	6686.1	0.1382	7.14928
C3	Early-down	HRE	HSF	Striatum-HSF1-ChIP-Seq	GSE38000	Homer	TTCTAGAABNTTCTA	1	1	9	0.0265	1963.5	0.0406	8.2342
C3	Early-down	Hoxc9	Homeobox	Ainv15-Hoxc9-ChIP-Seq	GSE21812	Homer	GGCCATAAATCA	1	1	20	0.059	3829.7	0.0792	6.35975
C3	Early-down	Pax7	Paired,Homeobox	Myoblast-Pax7-ChIP-Seq	GSE25064	Homer	TAATCAATTA	1	1	2	0.0059	634.9	0.0131	8.51472
C3	Early-down	Etv2	ETS	ES-ER71-ChIP-Seq	GSE59402	Homer	NNAYTTCCTGHN	1	1	61	0.1799	10262.4	0.2122	7.21376
C3	Early-down	Six4	Homeobox	MCF7-SIX4-ChIP-Seq	Encode	Homer	TGWAAYCTGABACCB	1	1	1	0.0029	397.4	0.0082	9.91365
C3	Early-down	PPARE	NR,DR1	3T3L1-Pparg-ChIP-Seq	GSE13511	Homer	TGACCTTTGCCCCA	1	1	58	0.1711	9836.9	0.2034	6.96882
C3	Early-down	Gli2	Zf	GM2-Gli2-ChIP-Chip	GSE112702	Homer	YSTGGGTGGTCT	1	1	16	0.0472	3203.6	0.0662	8.36738
C3	Early-down	EHF	ETS	LoVo-EHF-ChIP-Seq	GSE49402	Homer	AVCAGGAAGT	1	1	81	0.2389	13338	0.2758	7.21279
C3	Early-down	NFAT	RHD	Jurkat-NFATC1-ChIP-Seq	Jolma_et_al.	Homer	ATTTTCCATT	1	1	41	0.1209	7286.2	0.1506	6.82293
C3	Early-down	Slug	Zf	Mesoderm-Snai2-ChIP-Seq	GSE61475	Homer	SNGCACCTGCHS	1	1	39	0.115	7016.8	0.1451	7.2621
C3	Early-down	COUP-TFII	NR	Artia-Nr2f2-ChIP-Seq	GSE46497	Homer	AGRGGTCA	1	1	107	0.3156	17337.2	0.3585	5.83688
C3	Early-down	ERG	ETS	VCaP-ERG-ChIP-Seq	GSE14097	Homer	ACAGGAAGTG	1	1	103	0.3038	16749.5	0.3463	6.43341
C3	Early-down	Prop1	Homeobox	GHFT1-PROP1.biotin-ChIP-Seq	GSE77302	Homer	NTAATBNAATTA	1	1	20	0.059	3992	0.0825	6.55312
C3	Early-down	ELF3	ETS	PDAC-ELF3-ChIP-Seq	GSE64557	Homer	ANCAGGAAGT	1	1	41	0.1209	7392	0.1528	7.58608
C3	Early-down	ZFX	Zf	mES-Zfx-ChIP-Seq	GSE11431	Homer	AGGCCTRG	1	1	90	0.2655	14871.8	0.3075	6.24845
C3	Early-down	HRE	HSF	HepG2-HSF1-ChIP-Seq	GSE31477	Homer	BSTTCTRGAABVTTCYAGAA	1	1	6	0.0177	1552.7	0.0321	8.44025
C3	Early-down	RARa	NR	K562-RARa-ChIP-Seq	Encode	Homer	TTGAMCTTTG	1	1	165	0.4867	25801.6	0.5335	5.64635
C3	Early-down	MafB	bZIP	BMM-Mafb-ChIP-Seq	GSE75722	Homer	WNTGCTGASTCAGCANWTTY	1	1	22	0.0649	4381	0.0906	6.39362
C3	Early-down	Bach1	bZIP	K562-Bach1-ChIP-Seq	GSE31477	Homer	AWWNTGCTGAGTCAT	1	1	1	0.0029	477.7	0.0099	9.34972
C3	Early-down	GFY-Staf	?,Zf	Promoter	NA	Homer	RACTACAATTCCCAGAAKGC	1	1	2	0.0059	756.3	0.0156	4.60953
C3	Early-down	Nkx2.1	Homeobox	LungAC-Nkx2.1-ChIP-Seq	GSE43252	Homer	RSCACTYRAG	1	1	174	0.5133	27202	0.5624	5.68755
C3	Early-down	ETS	ETS	Promoter	NA	Homer	AACCGGAAGT	1	1	22	0.0649	4452.3	0.0921	7.14795
C3	Early-down	BMAL1	bHLH	Liver-Bmal1-ChIP-Seq	GSE39860	Homer	GNCACGTG	1	1	109	0.3215	17871.7	0.3695	4.83962
C3	Early-down	THRb	NR	Liver-NR1A2-ChIP-Seq	GSE52613	Homer	TRAGGTCA	1	1	224	0.6608	34204.1	0.7072	5.1173
C3	Early-down	TCFL2	HMG	K562-TCF7L2-ChIP-Seq	GSE29196	Homer	ACWTCAAAGG	1	1	2	0.0059	777.8	0.0161	7.7909
C3	Early-down	CRX	Homeobox	Retina-Crx-ChIP-Seq	GSE20012	Homer	GCTAATCC	1	1	123	0.3628	19968	0.4129	4.85243
C3	Early-down	ELF5	ETS	T47D-ELF5-ChIP-Seq	GSE30407	Homer	ACVAGGAAGT	1	1	42	0.1239	7744.5	0.1601	6.8543
C3	Early-down	NF-E2	bZIP	K562-NFE2-ChIP-Seq	GSE31477	Homer	GATGACTCAGCA	1	1	1	0.0029	544.3	0.0113	9.74838
C3	Early-down	ZNF711	Zf	SHSY5Y-ZNF711-ChIP-Seq	GSE20673	Homer	AGGCCTAG	1	1	133	0.3923	21582.1	0.4462	6.10193
C3	Early-down	ZBTB12	Zf	HEK293-ZBTB12.GFP-ChIP-Seq	GSE58341	Homer	NGNTCTAGAACCNGV	1	1	25	0.0737	5090.3	0.1052	7.36575
C3	Early-down	Gata1	Zf	K562-GATA1-ChIP-Seq	GSE18829	Homer	SAGATAAGRV	1	1	22	0.0649	4604.5	0.0952	6.40298
C3	Early-down	NFE2L2	bZIP	HepG2-NFE2L2-ChIP-Seq	Encode	Homer	AWWWTGCTGAGTCAT	1	1	1	0.0029	580.5	0.012	9.88653
C3	Early-down	Zac1	Zf	Neuro2A-Plagl1-ChIP-Seq	GSE75942	Homer	HAWGRGGCCM	1	1	178	0.5251	28096	0.5809	5.51033
C3	Early-down	HNF4a	NR,DR1	HepG2-HNF4a-ChIP-Seq	GSE25021	Homer	CARRGKBCAAAGTYCA	1	1	23	0.0678	4828.4	0.0998	7.85757
C3	Early-down	Nr5a2	NR	mES-Nr5a2-ChIP-Seq	GSE19019	Homer	BTCAAGGTCA	1	1	31	0.0914	6170.8	0.1276	7.61376
C3	Early-down	ARE	NR	LNCAP-AR-ChIP-Seq	GSE27824	Homer	RGRACASNSTGTYCYB	1	1	13	0.0383	3084.6	0.0638	7.77899
C3	Early-down	HIF-1a	bHLH	MCF7-HIF1a-ChIP-Seq	GSE28352	Homer	TACGTGCV	1	1	11	0.0324	2760.2	0.0571	7.05527
C3	Early-down	ETS1	ETS	Jurkat-ETS1-ChIP-Seq	GSE17954	Homer	ACAGGAAGTG	1	1	67	0.1976	11968.3	0.2475	6.52537
C3	Early-down	Tbx6	T-box	ESC-Tbx6-ChIP-Seq	GSE93524	Homer	DAGGTGTBAA	1	1	54	0.1593	9957.4	0.2059	6.34926
C3	Early-down	Elk4	ETS	Hela-Elk4-ChIP-Seq	GSE31477	Homer	NRYTTCCGGY	1	1	39	0.115	7573.4	0.1566	6.6569
C3	Early-down	Tcf3	HMG	mES-Tcf3-ChIP-Seq	GSE11724	Homer	ASWTCAAAGG	1	1	9	0.0265	2406.9	0.0498	8.52904
C3	Early-down	GABPA	ETS	Jurkat-GABPa-ChIP-Seq	GSE17954	Homer	RACCGGAAGT	1	1	59	0.174	10770.8	0.2227	6.58177
C3	Early-down	LRF	Zf	Erythroblasts-ZBTB7A-ChIP-Seq	GSE74977	Homer	AAGACCCYYN	1	1	113	0.3333	18968.1	0.3922	6.78566
C3	Early-down	Elk1	ETS	Hela-Elk1-ChIP-Seq	GSE31477	Homer	HACTTCCGGY	1	1	39	0.115	7684.2	0.1589	6.72183
C3	Early-down	Fli1	ETS	CD8-FLI-ChIP-Seq	GSE20898	Homer	NRYTTCCGGH	1	1	73	0.2153	13128.3	0.2714	5.89729
C3	Early-down	ERRg	NR	Kidney-ESRRG-ChIP-Seq	GSE104905	Homer	GTGACCTTGRVN	1	1	44	0.1298	8581.3	0.1774	7.03644
C3	Early-down	RARg	NR	ES-RARg-ChIP-Seq	GSE30538	Homer	AGGTCAAGGTCA	1	1	2	0.0059	1045.8	0.0216	11.1266
C3	Early-down	ELF1	ETS	Jurkat-ELF1-ChIP-Seq	SRA014231	Homer	AVCCGGAAGT	1	1	34	0.1003	7116.6	0.1471	6.81931
C3	Early-down	VDR	NR,DR3	GM10855-VDR+vitD-ChIP-Seq	GSE22484	Homer	ARAGGTCANWGAGTTCANNN	1	1	6	0.0177	2123	0.0439	8.33047
C3	Early-down	GSC	Homeobox	FrogEmbryos-GSC-ChIP-Seq	DRA000576	Homer	RGGATTAR	1	1	51	0.1504	10380.3	0.2146	6.27719
C3	Early-down	c-Myc	bHLH	mES-cMyc-ChIP-Seq	GSE11431	Homer	VVCCACGTGG	1	1	25	0.0737	5978.2	0.1236	6.80884
C3	Early-down	ETV1	ETS	GIST48-ETV1-ChIP-Seq	GSE22441	Homer	AACCGGAAGT	1	1	84	0.2478	15648	0.3235	6.28588
C3	Early-down	Elf4	ETS	BMDM-Elf4-ChIP-Seq	GSE88699	Homer	ACTTCCKGKT	1	1	58	0.1711	11623.9	0.2403	6.93529
C3	Early-down	ETV4	ETS	HepG2-ETV4-ChIP-Seq	ENCODE	Homer	ACCGGAAGTG	1	1	70	0.2065	13769.6	0.2847	6.20352
C3	Early-down	Otx2	Homeobox	EpiLC-Otx2-ChIP-Seq	GSE56098	Homer	NYTAATCCYB	1	1	30	0.0885	7499.9	0.1551	6.67091
C3	Early-down	E2A	bHLH,near_PU.1	Bcell-PU.1-ChIP-Seq	GSE21512	Homer	NVCACCTGBN	1	1	79	0.233	16457	0.3403	7.41752
C3	Early-down	ZEB2	Zf	SNU398-ZEB2-ChIP-Seq	GSE103048	Homer	GNMCAGGTGTGC	1	1	47	0.1386	11564.6	0.2391	6.93338
C3	Early-down	ZEB1	Zf	PDAC-ZEB1-ChIP-Seq	GSE64557	Homer	VCAGGTRDRY	1	1	85	0.2507	19154.4	0.396	5.94141
C3	Early-down	RAR:RXR	NR,DR5	ES-RAR-ChIP-Seq	GSE56893	Homer	RGGTCADNNAGAGGTCAV	1	1	0	0	270	0.0056	9.38952
C3	Early-down	RAR:RXR	NR,DR5	ES-RAR-ChIP-Seq	GSE56893	Homer	RGGTCADNNAGAGGTCAV	1	1	0	0	270	0.0056	11.1934
C3	Early-down	DUX	Homeobox	C2C12-Dux-ChIP-Seq	GSE87279	Homer	BCWGATTCAATCAAN	1	1	0	0	23	0.0005	12.6144
C3	Early-down	GFX	?	Promoter	NA	Homer	ATTCTCGCGAGA	1	1	0	0	250.6	0.0052	9.30792
C3	Early-down	Nrf2	bZIP	Lymphoblast-Nrf2-ChIP-Seq	GSE37589	Homer	HTGCTGAGTCAT	1	1	0	0	443	0.0092	9.792
C3	Early-down	OCT:OCT	POU,Homeobox	NPC-Brn1-ChIP-Seq	GSE35496	Homer	ATGAATATTCATGAG	1	1	0	0	60.3	0.0012	12.3184
C3	Early-down	OCT:OCT	POU,Homeobox	NPC-OCT6-ChIP-Seq	GSE43916	Homer	YATGCATATRCATRT	1	1	0	0	1156	0.0239	9.58608
C3	Early-down	Pax7	Paired,Homeobox,longest	Myoblast-Pax7-ChIP-Seq	GSE25064	Homer	NTAATTDGCYAATTANNWWD	1	1	0	0	190.5	0.0039	10.9116
C3	Early-down	Ronin	THAP	ES-Thap11-ChIP-Seq	GSE51522	Homer	RACTACAACTCCCAGVAKGC	1	1	0	0	376.5	0.0078	9.95423
C3	Early-down	T1ISRE	IRF	ThioMac-Ifnb-Expression	NA	Homer	ACTTTCGTTTCT	1	1	0	0	79.9	0.0017	11.712
C3	Early-down	ZFP3	Zf	HEK293-ZFP3.GFP-ChIP-Seq	GSE58341	Homer	GGGTTTTGAAGGATGARTAGGAGTT	1	1	0	0	9.6	0.0002	6.71656
C3	Early-down	ZNF528	Zf	HEK293-ZNF528.GFP-ChIP-Seq	GSE58341	Homer	AGAAATGACTTCCCT	1	1	0	0	57.7	0.0012	12.8603
C4	Late-down	Sox10	HMG	SciaticNerve-Sox3-ChIP-Seq	GSE35132	Homer	CCWTTGTYYB	1e-08	0	74	0.5034	13113.3	0.2719	6.6401
C4	Late-down	Sox3	HMG	NPC-Sox3-ChIP-Seq	GSE33059	Homer	CCWTTGTY	1e-06	0.0001	69	0.4694	13474.4	0.2794	6.56384
C4	Late-down	Sox2	HMG	mES-Sox2-ChIP-Seq	GSE11431	Homer	BCCATTGTTC	0.0001	0.0021	42	0.2857	7239.3	0.1501	6.78547
C4	Late-down	Sox9	HMG	Limb-SOX9-ChIP-Seq	GSE73225	Homer	AGGVNCCTTTGT	0.0001	0.0028	41	0.2789	7140.6	0.1481	7.19245
C4	Late-down	Sox4	HMG	proB-Sox4-ChIP-Seq	GSE50066	Homer	YCTTTGTTCC	0.0001	0.0028	41	0.2789	7173.4	0.1488	7.06867
C4	Late-down	Sox17	HMG	Endoderm-Sox17-ChIP-Seq	GSE61475	Homer	CCATTGTTYB	0.0001	0.0032	34	0.2313	5537.5	0.1148	6.82454
C4	Late-down	Sox6	HMG	Myotubes-Sox6-ChIP-Seq	GSE32627	Homer	CCATTGTTNY	0.001	0.0196	55	0.3741	11888.1	0.2465	6.33114
C4	Late-down	Sox15	HMG	CPA-Sox15-ChIP-Seq	GSE62909	Homer	RAACAATGGN	0.01	0.0464	41	0.2789	8383.7	0.1739	7.12231
C4	Late-down	Tcf21	bHLH	ArterySmoothMuscle-Tcf21-ChIP-Seq	GSE61369	Homer	NAACAGCTGG	0.01	0.0531	48	0.3265	10440.2	0.2165	6.46026
C4	Late-down	ZNF143|STAF	Zf	CUTLL-ZNF143-ChIP-Seq	GSE29600	Homer	ATTTCCCAGVAKSCY	0.01	0.0718	24	0.1633	4183.3	0.0868	8.6236
C4	Late-down	Atf7	bZIP	3T3L1-Atf7-ChIP-Seq	GSE56872	Homer	NGRTGACGTCAY	0.01	0.0817	23	0.1565	4004.9	0.0831	6.73534
C4	Late-down	Atf2	bZIP	3T3L1-Atf2-ChIP-Seq	GSE56872	Homer	NRRTGACGTCAT	0.01	0.0909	18	0.1224	2863.2	0.0594	7.09852
C4	Late-down	Tgif1	Homeobox	mES-Tgif1-ChIP-Seq	GSE55404	Homer	YTGWCADY	0.01	0.1126	85	0.5782	22425.1	0.4651	4.97491
C4	Late-down	c-Jun-CRE	bZIP	K562-cJun-ChIP-Seq	GSE31477	Homer	ATGACGTCATCY	0.01	0.1126	16	0.1088	2492.6	0.0517	7.33792
C4	Late-down	NF1-halfsite	CTF	LNCaP-NF1-ChIP-Seq	Unpublished	Homer	YTGCCAAG	0.01	0.1337	67	0.4558	16874.3	0.3499	6.73433
C4	Late-down	NF1	CTF	LNCAP-NF1-ChIP-Seq	Unpublished	Homer	CYTGGCABNSTGCCAR	0.01	0.149	23	0.1565	4320.9	0.0896	7.59834
C4	Late-down	Srebp1a	bHLH	HepG2-Srebp1a-ChIP-Seq	GSE31477	Homer	RTCACSCCAY	0.01	0.1725	12	0.0816	1745.1	0.0362	7.91168
C4	Late-down	Sp1	Zf	Promoter	NA	Homer	GGCCCCGCCCCC	0.01	0.1763	45	0.3061	10510.6	0.218	8.68507
C4	Late-down	Srebp2	bHLH	HepG2-Srebp2-ChIP-Seq	GSE31477	Homer	CGGTCACSCCAC	0.01	0.1772	10	0.068	1343.3	0.0279	8.76533
C4	Late-down	WT1	Zf	Kidney-WT1-ChIP-Seq	GSE90016	Homer	MCTCCCMCRCAB	0.01	0.1821	49	0.3333	11762.8	0.2439	7.71093
C4	Late-down	TCF4	bHLH	SHSY5Y-TCF4-ChIP-Seq	GSE96915	Homer	SMCATCTGKH	0.01	0.1821	58	0.3946	14474.9	0.3002	7.0005
C4	Late-down	Sp5	Zf	mES-Sp5.Flag-ChIP-Seq	GSE72989	Homer	RGKGGGCGGAGC	0.01	0.1821	81	0.551	21762.5	0.4513	6.51975
C4	Late-down	Hnf6b	Homeobox	LNCaP-Hnf6b-ChIP-Seq	GSE106305	Homer	TATTGAYY	0.1	0.1971	25	0.1701	5083.5	0.1054	6.25467
C4	Late-down	JunD	bZIP	K562-JunD-ChIP-Seq	NA	Homer	ATGACGTCATCN	0.1	0.1971	8	0.0544	993.9	0.0206	8.84006
C4	Late-down	BORIS	Zf	K562-CTCFL-ChIP-Seq	GSE32465	Homer	CNNBRGCGCCCCCTGSTGGC	0.1	0.2014	23	0.1565	4596.8	0.0953	9.03288
C4	Late-down	Klf9	Zf	GBM-Klf9-ChIP-Seq	GSE62211	Homer	GCCACRCCCACY	0.1	0.2172	42	0.2857	9956.7	0.2065	7.93508
C4	Late-down	Atoh1	bHLH	Cerebellum-Atoh1-ChIP-Seq	GSE22111	Homer	VNRVCAGCTGGY	0.1	0.2235	47	0.3197	11470.1	0.2379	6.0307
C4	Late-down	Twist2	bHLH	Myoblast-Twist2.Ty1-ChIP-Seq	GSE127998	Homer	MCAGCTGBYH	0.1	0.2852	65	0.4422	17206	0.3568	3.81893
C4	Late-down	KLF3	Zf	MEF-Klf3-ChIP-Seq	GSE44748	Homer	NRGCCCCRCCCHBNN	0.1	0.2961	48	0.3265	12024.6	0.2494	5.50528
C4	Late-down	NFY	CCAAT	Promoter	NA	Homer	RGCCAATSRG	0.1	0.368	38	0.2585	9220.2	0.1912	4.70551
C4	Late-down	Tcf12	bHLH	GM12878-Tcf12-ChIP-Seq	GSE32465	Homer	VCAGCTGYTG	0.1	0.3731	45	0.3061	11328.3	0.2349	7.14623
C4	Late-down	Rbpj1	?	Panc1-Rbpj1-ChIP-Seq	GSE47459	Homer	HTTTCCCASG	0.1	0.3794	51	0.3469	13180.7	0.2733	6.78071
C4	Late-down	ZSCAN22	Zf	HEK293-ZSCAN22.GFP-ChIP-Seq	GSE58341	Homer	SMCAGTCWGAKGGAGGAGGC	0.1	0.3845	8	0.0544	1200.1	0.0249	10.1568
C4	Late-down	Myf5	bHLH	GM-Myf5-ChIP-Seq	GSE24852	Homer	BAACAGCTGT	0.1	0.4079	32	0.2177	7613.4	0.1579	7.32271
C4	Late-down	MyoD	bHLH	Myotube-MyoD-ChIP-Seq	GSE21614	Homer	RRCAGCTGYTSY	0.1	0.4079	40	0.2721	9970.6	0.2068	7.24983
C4	Late-down	NeuroD1	bHLH	Islet-NeuroD1-ChIP-Seq	GSE30298	Homer	GCCATCTGTT	0.1	0.4079	34	0.2313	8205.7	0.1702	7.08142
C4	Late-down	OCT:OCT-short	POU,Homeobox	NPC-OCT6-ChIP-Seq	GSE43916	Homer	ATGCATWATGCATRW	0.1	0.4079	17	0.1156	3480.6	0.0722	-3.93033
C4	Late-down	Egr1	Zf	K562-Egr1-ChIP-Seq	GSE32465	Homer	TGCGTGGGYG	0.1	0.4148	53	0.3605	14009.2	0.2905	7.3533
C4	Late-down	FOXP1	Forkhead	H9-FOXP1-ChIP-Seq	GSE31006	Homer	NYYTGTTTACHN	0.1	0.4386	14	0.0952	2758.1	0.0572	7.72718
C4	Late-down	Znf263	Zf	K562-Znf263-ChIP-Seq	GSE31477	Homer	CVGTSCTCCC	0.1	0.4386	85	0.5782	24325.8	0.5045	3.87722
C4	Late-down	NRF1	NRF	MCF7-NRF1-ChIP-Seq	Unpublished	Homer	CTGCGCATGCGC	0.1	0.4386	22	0.1497	4926.1	0.1022	8.59578
C4	Late-down	PAX5	Paired,Homeobox	GM12878-PAX5-ChIP-Seq	GSE32465	Homer	GCAGCCAAGCRTGACH	0.1	0.4386	22	0.1497	4927.5	0.1022	7.20944
C4	Late-down	Atf1	bZIP	K562-ATF1-ChIP-Seq	GSE31477	Homer	GATGACGTCA	0.1	0.4405	24	0.1633	5520.7	0.1145	6.25078
C4	Late-down	NeuroG2	bHLH	Fibroblast-NeuroG2-ChIP-Seq	GSE75910	Homer	ACCATCTGTT	0.1	0.4405	54	0.3673	14464.7	0.3	5.7876
C4	Late-down	Ap4	bHLH	AML-Tfap4-ChIP-Seq	GSE45738	Homer	NAHCAGCTGD	0.1	0.4405	49	0.3333	12931.6	0.2682	6.11698
C4	Late-down	CRE	bZIP	Promoter	NA	Homer	CSGTGACGTCAC	0.1	0.4405	15	0.102	3093	0.0641	5.91825
C4	Late-down	NRF	NRF	Promoter	NA	Homer	STGCGCATGCGC	0.1	0.442	21	0.1429	4738.1	0.0983	1.45717
C4	Late-down	ZNF189	Zf	HEK293-ZNF189.GFP-ChIP-Seq	GSE58341	Homer	TGGAACAGMA	0.1	0.4532	35	0.2381	8806.2	0.1826	7.11928
C4	Late-down	ZKSCAN1	Zf	HepG2-ZKSCAN1-ChIP-Seq	Encode	Homer	GCACAYAGTAGGKCY	0.1	0.459	3	0.0204	283.3	0.0059	10.0667
C4	Late-down	Hoxa9	Homeobox	ChickenMSG-Hoxa9.Flag-ChIP-Seq	GSE86088	Homer	RGCAATNAAA	0.1	0.459	65	0.4422	18098.5	0.3753	5.52419
C4	Late-down	Zic	Zf	Cerebellum-ZIC1.2-ChIP-Seq	GSE60731	Homer	CCTGCTGAGH	0.1	0.459	40	0.2721	10350.6	0.2147	7.26844
C4	Late-down	LEF1	HMG	H1-LEF1-ChIP-Seq	GSE64758	Homer	CCTTTGATST	0.1	0.4646	21	0.1429	4817	0.0999	7.55657
C4	Late-down	Maz	Zf	HepG2-Maz-ChIP-Seq	GSE31477	Homer	GGGGGGGG	0.1	0.4646	86	0.585	24977.3	0.518	7.47877
C4	Late-down	PAX6	Paired,Homeobox	Forebrain-Pax6-ChIP-Seq	GSE66961	Homer	NGTGTTCAVTSAAGCGKAAA	0.1	0.4646	5	0.034	693.4	0.0144	8.86092
C4	Late-down	BHLHA15	bHLH	NIH3T3-BHLHB8.HA-ChIP-Seq	GSE119782	Homer	NAMCAGCTGK	0.1	0.4733	51	0.3469	13809.2	0.2864	6.8237
C4	Late-down	ZNF415	Zf	HEK293-ZNF415.GFP-ChIP-Seq	GSE58341	Homer	GRTGMTRGAGCC	0.1	0.4736	31	0.2109	7757.2	0.1609	6.9449
C4	Late-down	Tcf7	HMG	GM12878-TCF7-ChIP-Seq	Encode	Homer	CTTTGATGTGSB	0.1	0.4736	12	0.0816	2414.1	0.0501	8.21097
C4	Late-down	Zfp281	Zf	ES-Zfp281-ChIP-Seq	GSE81042	Homer	CCCCTCCCCCAC	0.1	0.4736	24	0.1633	5736.8	0.119	9.77408
C4	Late-down	BATF	bZIP	Th17-BATF-ChIP-Seq	GSE39756	Homer	DATGASTCAT	0.1	0.4736	18	0.1224	4047	0.0839	6.40806
C4	Late-down	Rfx2	HTH	LoVo-RFX2-ChIP-Seq	GSE49402	Homer	GTTGCCATGGCAACM	0.1	0.4829	7	0.0476	1183.3	0.0245	8.14702
C4	Late-down	CTCF	Zf	CD4+-CTCF-ChIP-Seq	Barski_et_al.	Homer	AYAGTGCCMYCTRGTGGCCA	0.1	0.505	10	0.068	1949.9	0.0404	8.70484
C4	Late-down	Rfx6	HTH	Min6b1-Rfx6.HA-ChIP-Seq	GSE62844	Homer	TGTTKCCTAGCAACM	0.1	0.505	46	0.3129	12419.3	0.2576	3.33026
C4	Late-down	MafF	bZIP	HepG2-MafF-ChIP-Seq	GSE31477	Homer	HWWGTCAGCAWWTTT	0.1	0.505	8	0.0544	1449.5	0.0301	8.35902
C4	Late-down	REST-NRSF	Zf	Jurkat-NRSF-ChIP-Seq	NA	Homer	GGMGCTGTCCATGGTGCTGA	0.1	0.505	2	0.0136	151.5	0.0031	12.2683
C4	Late-down	Mef2d	MADS	Retina-Mef2d-ChIP-Seq	GSE61391	Homer	GCTATTTTTAGC	0.1	0.505	6	0.0408	974.3	0.0202	8.64724
C4	Late-down	Tlx?	NR	NPC-H3K4me1-ChIP-Seq	GSE16256	Homer	CTGGCAGSCTGCCA	0.1	0.505	19	0.1293	4415.4	0.0916	7.86509
C4	Late-down	RBPJ:Ebox	?,bHLH	Panc1-Rbpj1-ChIP-Seq	GSE47459	Homer	GGGRAARRGRMCAGMTG	0.1	0.5065	16	0.1088	3599.7	0.0747	8.85279
C4	Late-down	RUNX-AML	Runt	CD4+-PolII-ChIP-Seq	Barski_et_al.	Homer	GCTGTGGTTW	0.1	0.5065	23	0.1565	5589.8	0.1159	7.38572
C4	Late-down	Barx1	Homeobox	Stomach-Barx1.3xFlag-ChIP-Seq	GSE69483	Homer	AAACMATTAN	0.1	0.5065	13	0.0884	2788.4	0.0578	6.18251
C4	Late-down	Meis1	Homeobox	MastCells-Meis1-ChIP-Seq	GSE48085	Homer	VGCTGWCAVB	0.1	0.5065	56	0.381	15642.5	0.3244	6.3078
C4	Late-down	HIC1	Zf	Treg-ZBTB29-ChIP-Seq	GSE99889	Homer	TGCCAGCB	0.1	0.5102	82	0.5578	24046.5	0.4987	5.97511
C4	Late-down	Usf2	bHLH	C2C12-Usf2-ChIP-Seq	GSE36030	Homer	GTCACGTGGT	0.1	0.5102	14	0.0952	3085.5	0.064	7.54255
C4	Late-down	Foxo1	Forkhead	RAW-Foxo1-ChIP-Seq	Fan_et_al.	Homer	CTGTTTAC	0.1	0.5235	52	0.3537	14466.9	0.3	6.16467
C4	Late-down	Tgif2	Homeobox	mES-Tgif2-ChIP-Seq	GSE55404	Homer	TGTCANYT	0.1	0.5235	83	0.5646	24435.7	0.5068	5.21446
C4	Late-down	Tbx20	T-box	Heart-Tbx20-ChIP-Seq	GSE29636	Homer	GGTGYTGACAGS	0.1	0.539	10	0.068	2052.2	0.0426	8.53871
C4	Late-down	Ronin	THAP	ES-Thap11-ChIP-Seq	GSE51522	Homer	RACTACAACTCCCAGVAKGC	0.1	0.539	4	0.0272	572.3	0.0119	9.95423
C4	Late-down	RXR	NR,DR1	3T3L1-RXR-ChIP-Seq	GSE13511	Homer	TAGGGCAAAGGTCA	1	0.5436	43	0.2925	11750.8	0.2437	6.64118
C4	Late-down	Foxo3	Forkhead	U2OS-Foxo3-ChIP-Seq	E-MTAB-2701	Homer	DGTAAACA	1	0.5436	19	0.1293	4569.5	0.0948	4.67304
C4	Late-down	Pitx1:Ebox	Homeobox,bHLH	Hindlimb-Pitx1-ChIP-Seq	GSE41591	Homer	YTAATTRAWWCCAGATGT	1	0.5665	6	0.0408	1064.4	0.0221	8.90411
C4	Late-down	HRE	HSF	Striatum-HSF1-ChIP-Seq	GSE38000	Homer	TTCTAGAABNTTCTA	1	0.5665	9	0.0612	1834.3	0.038	8.2342
C4	Late-down	MafA	bZIP	Islet-MafA-ChIP-Seq	GSE30298	Homer	TGCTGACTCA	1	0.5771	30	0.2041	7880.5	0.1634	6.97933
C4	Late-down	p53	p53	mES-cMyc-ChIP-Seq	GSE11431	Homer	ACATGCCCGGGCAT	1	0.5771	2	0.0136	188.1	0.0039	11.0481
C4	Late-down	Stat3	Stat	mES-Stat3-ChIP-Seq	GSE11431	Homer	CTTCCGGGAA	1	0.5872	21	0.1429	5240.9	0.1087	7.06388
C4	Late-down	Tcf3	HMG	mES-Tcf3-ChIP-Seq	GSE11724	Homer	ASWTCAAAGG	1	0.5922	9	0.0612	1872.6	0.0388	8.52904
C4	Late-down	MyoG	bHLH	C2C12-MyoG-ChIP-Seq	GSE36024	Homer	AACAGCTG	1	0.6095	43	0.2925	11955.7	0.2479	6.58794
C4	Late-down	GFY	?	Promoter	NA	Homer	ACTACAATTCCC	1	0.6159	5	0.034	868.7	0.018	9.37784
C4	Late-down	FOXK2	Forkhead	U2OS-FOXK2-ChIP-Seq	E-MTAB-2204	Homer	SCHTGTTTACAT	1	0.6191	17	0.1156	4145.9	0.086	7.29725
C4	Late-down	Smad4	MAD	ESC-SMAD4-ChIP-Seq	GSE29422	Homer	VBSYGTCTGG	1	0.6266	62	0.4218	18038.9	0.3741	6.4299
C4	Late-down	GFY-Staf	?,Zf	Promoter	NA	Homer	RACTACAATTCCCAGAAKGC	1	0.6266	5	0.034	883.5	0.0183	4.60953
C4	Late-down	Unknown-ESC-element	?	mES-Nanog-ChIP-Seq	GSE11724	Homer	CACAGCAGGGGG	1	0.6291	25	0.1701	6546.2	0.1358	7.69767
C4	Late-down	Pax8	Paired,Homeobox	Thyroid-Pax8-ChIP-Seq	GSE26938	Homer	GTCATGCHTGRCTGS	1	0.6291	16	0.1088	3903.1	0.0809	8.21097
C4	Late-down	Olig2	bHLH	Neuron-Olig2-ChIP-Seq	GSE30882	Homer	RCCATMTGTT	1	0.6394	58	0.3946	16844.4	0.3493	6.05339
C4	Late-down	Fra1	bZIP	BT549-Fra1-ChIP-Seq	GSE46166	Homer	NNATGASTCATH	1	0.6647	14	0.0952	3381.4	0.0701	7.01174
C4	Late-down	Hoxa10	Homeobox	ChickenMSG-Hoxa10.Flag-ChIP-Seq	GSE86088	Homer	GGYAATGAAA	1	0.7556	14	0.0952	3470.6	0.072	7.08661
C4	Late-down	RAR:RXR	NR,DR5	ES-RAR-ChIP-Seq	GSE56893	Homer	RGGTCADNNAGAGGTCAV	1	0.7556	2	0.0136	247.2	0.0051	9.38952
C4	Late-down	RAR:RXR	NR,DR5	ES-RAR-ChIP-Seq	GSE56893	Homer	RGGTCADNNAGAGGTCAV	1	0.7556	2	0.0136	247.2	0.0051	11.1934
C4	Late-down	Reverb	NR,DR2	RAW-Reverba.biotin-ChIP-Seq	GSE45914	Homer	GTRGGTCASTGGGTCA	1	0.7616	6	0.0408	1239	0.0257	8.70919
C4	Late-down	Mef2a	MADS	HL1-Mef2a.biotin-ChIP-Seq	GSE21529	Homer	CYAAAAATAG	1	0.7738	10	0.068	2354.1	0.0488	7.66895
C4	Late-down	KLF14	Zf	HEK293-KLF14.GFP-ChIP-Seq	GSE58341	Homer	RGKGGGCGKGGC	1	0.7756	94	0.6395	28922.1	0.5998	6.33053
C4	Late-down	Cux2	Homeobox	Liver-Cux2-ChIP-Seq	GSE35985	Homer	HNRAATCAAT	1	0.7881	11	0.0748	2661.2	0.0552	6.35909
C4	Late-down	PAX5	Paired,Homeobox,condensed	GM12878-PAX5-ChIP-Seq	GSE32465	Homer	GTCACGCTCSCTGM	1	0.7881	6	0.0408	1268.9	0.0263	8.4801
C4	Late-down	KLF5	Zf	LoVo-KLF5-ChIP-Seq	GSE49402	Homer	DGGGYGKGGC	1	0.7881	76	0.517	23047.6	0.478	6.67009
C4	Late-down	Hoxc9	Homeobox	Ainv15-Hoxc9-ChIP-Seq	GSE21812	Homer	GGCCATAAATCA	1	0.7881	12	0.0816	2967.9	0.0615	6.35975
C4	Late-down	ZNF675	Zf	HEK293-ZNF675.GFP-ChIP-Seq	GSE58341	Homer	ARGAGGMCAAAATGW	1	0.7881	5	0.034	1014.2	0.021	8.91287
C4	Late-down	GATA3	Zf,DR4	iTreg-Gata3-ChIP-Seq	GSE20898	Homer	AGATGKDGAGATAAG	1	0.7969	3	0.0204	508.2	0.0105	8.17976
C4	Late-down	NFIL3	bZIP	HepG2-NFIL3-ChIP-Seq	Encode	Homer	VTTACGTAAYNNNNN	1	0.8016	15	0.102	3885.7	0.0806	6.41388
C4	Late-down	STAT4	Stat	CD4-Stat4-ChIP-Seq	GSE22104	Homer	NYTTCCWGGAAR	1	0.8016	26	0.1769	7217.8	0.1497	5.22025
C4	Late-down	STAT6	Stat	Macrophage-Stat6-ChIP-Seq	GSE38377	Homer	TTCCKNAGAA	1	0.8016	15	0.102	3890	0.0807	6.48048
C4	Late-down	FOXA1	Forkhead	LNCAP-FOXA1-ChIP-Seq	GSE27824	Homer	WAAGTAAACA	1	0.8016	27	0.1837	7530.6	0.1562	6.33753
C4	Late-down	OCT4-SOX2-TCF-NANOG	POU,Homeobox,HMG	mES-Oct4-ChIP-Seq	GSE11431	Homer	ATTTGCATAACAATG	1	0.8074	5	0.034	1044.2	0.0217	8.75142
C4	Late-down	T1ISRE	IRF	ThioMac-Ifnb-Expression	NA	Homer	ACTTTCGTTTCT	1	0.8076	1	0.0068	80.1	0.0017	11.712
C4	Late-down	PAX3:FKHR-fusion	Paired,Homeobox	Rh4-PAX3:FKHR-ChIP-Seq	GSE19063	Homer	ACCRTGACTAATTNN	1	0.8094	6	0.0408	1325.6	0.0275	7.41361
C4	Late-down	OCT:OCT	POU,Homeobox,IR1	NPC-Brn2-ChIP-Seq	GSE35496	Homer	ATGAATWATTCATGA	1	0.8094	1	0.0068	81.9	0.0017	10.7838
C4	Late-down	HRE	HSF	HepG2-HSF1-ChIP-Seq	GSE31477	Homer	BSTTCTRGAABVTTCYAGAA	1	0.8094	7	0.0476	1605.6	0.0333	8.44025
C4	Late-down	COUP-TFII	NR	Artia-Nr2f2-ChIP-Seq	GSE46497	Homer	AGRGGTCA	1	0.8094	54	0.3673	16109.9	0.3341	5.83688
C4	Late-down	ZNF322	Zf	HEK293-ZNF322.GFP-ChIP-Seq	GSE58341	Homer	GAGCCTGGTACTGWGCCTGR	1	0.8094	14	0.0952	3649.9	0.0757	8.91909
C4	Late-down	GATA	Zf,IR3	iTreg-Gata3-ChIP-Seq	GSE20898	Homer	NNNNNBAGATAWYATCTVHN	1	0.8094	4	0.0272	794.9	0.0165	8.21231
C4	Late-down	Foxf1	Forkhead	Lung-Foxf1-ChIP-Seq	GSE77951	Homer	WWATRTAAACAN	1	0.8094	21	0.1429	5769.3	0.1196	6.34862
C4	Late-down	Stat3+il21	Stat	CD4-Stat3-ChIP-Seq	GSE19198	Homer	SVYTTCCNGGAARB	1	0.8094	23	0.1565	6402.9	0.1328	6.74705
C4	Late-down	Smad2	MAD	ES-SMAD2-ChIP-Seq	GSE29422	Homer	CTGTCTGG	1	0.8094	58	0.3946	17479.3	0.3625	6.10069
C4	Late-down	Hoxd10	Homeobox	ChickenMSG-Hoxd10.Flag-ChIP-Seq	GSE86088	Homer	GGCMATGAAA	1	0.8094	27	0.1837	7663.8	0.1589	6.61875
C4	Late-down	AP-1	bZIP	ThioMac-PU.1-ChIP-Seq	GSE21512	Homer	VTGACTCATC	1	0.8094	17	0.1156	4606.8	0.0955	6.04954
C4	Late-down	Ascl2	bHLH	ESC-Ascl2-ChIP-Seq	GSE97712	Homer	SSRGCAGCTGCH	1	0.8094	46	0.3129	13668.6	0.2835	5.54496
C4	Late-down	ZNF7	Zf	HepG2-ZNF7.Flag-ChIP-Seq	Encode	Homer	CTGCCWVCTTTTRTA	1	0.8094	15	0.102	4013.4	0.0832	6.31438
C4	Late-down	PR	NR	T47D-PR-ChIP-Seq	GSE31130	Homer	VAGRACAKNCTGTBC	1	0.8216	59	0.4014	17891.4	0.371	5.62734
C4	Late-down	PRDM14	Zf	H1-PRDM14-ChIP-Seq	GSE22767	Homer	RGGTCTCTAACY	1	0.8276	11	0.0748	2847.9	0.0591	7.19447
C4	Late-down	ZNF467	Zf	HEK293-ZNF467.GFP-ChIP-Seq	GSE58341	Homer	TGGGGAAGGGCM	1	0.8296	48	0.3265	14392.6	0.2985	7.76178
C4	Late-down	Hoxd12	Homeobox	ChickenMSG-Hoxd12.Flag-ChIP-Seq	GSE86088	Homer	HDGYAATGAAAN	1	0.8296	37	0.2517	10893	0.2259	6.23557
C4	Late-down	Atf3	bZIP	GBM-ATF3-ChIP-Seq	GSE33912	Homer	DATGASTCATHN	1	0.8296	15	0.102	4065.6	0.0843	5.97965
C4	Late-down	AP-2gamma	AP2	MCF7-TFAP2C-ChIP-Seq	GSE21234	Homer	SCCTSAGGSCAW	1	0.8296	57	0.3878	17307.1	0.3589	6.34979
C4	Late-down	RFX	HTH	K562-RFX3-ChIP-Seq	SRA012198	Homer	CGGTTGCCATGGCAAC	1	0.836	5	0.034	1132.7	0.0235	8.57081
C4	Late-down	ZNF16	Zf	HEK293-ZNF16.GFP-ChIP-Seq	GSE58341	Homer	MACCTTCYATGGCTCCCTAKTGCCY	1	0.836	1	0.0068	101.9	0.0021	9.5569
C4	Late-down	Foxh1	Forkhead	hESC-FOXH1-ChIP-Seq	GSE29422	Homer	NNTGTGGATTSS	1	0.8493	15	0.102	4113	0.0853	7.15123
C4	Late-down	Zic3	Zf	mES-Zic3-ChIP-Seq	GSE37889	Homer	GGCCYCCTGCTGDGH	1	0.8493	32	0.2177	9406.6	0.1951	7.88465
C4	Late-down	SCL	bHLH	HPC7-Scl-ChIP-Seq	GSE13511	Homer	AVCAGCTG	1	0.8493	116	0.7891	36861.7	0.7644	5.10049
C4	Late-down	Mef2c	MADS	GM12878-Mef2c-ChIP-Seq	GSE32465	Homer	DCYAAAAATAGM	1	0.8493	9	0.0612	2318.6	0.0481	7.87448
C4	Late-down	RUNX2	Runt	PCa-RUNX2-ChIP-Seq	GSE33889	Homer	NWAACCACADNN	1	0.8493	23	0.1565	6603.9	0.137	7.6722
C4	Late-down	bZIP:IRF	bZIP,IRF	Th17-BatF-ChIP-Seq	GSE39756	Homer	NAGTTTCABTHTGACTNW	1	0.8493	12	0.0816	3224.7	0.0669	8.08507
C4	Late-down	Sp2	Zf	HEK293-Sp2.eGFP-ChIP-Seq	Encode	Homer	YGGCCCCGCCCC	1	0.8493	83	0.5646	25899.8	0.5371	5.66256
C4	Late-down	PU.1:IRF8	ETS:IRF	pDC-Irf8-ChIP-Seq	GSE66899	Homer	GGAAGTGAAAST	1	0.8493	6	0.0408	1450.3	0.0301	8.98699
C4	Late-down	Hoxd13	Homeobox	ChickenMSG-Hoxd13.Flag-ChIP-Seq	GSE86088	Homer	NCYAATAAAA	1	0.8493	33	0.2245	9761.8	0.2024	6.01605
C4	Late-down	Gfi1b	Zf	HPC7-Gfi1b-ChIP-Seq	GSE22178	Homer	MAATCACTGC	1	0.8493	18	0.1224	5071.4	0.1052	6.76835
C4	Late-down	Klf4	Zf	mES-Klf4-ChIP-Seq	GSE11431	Homer	GCCACACCCA	1	0.8493	24	0.1633	6937.1	0.1439	7.33396
C4	Late-down	Arnt:Ahr	bHLH	MCF7-Arnt-ChIP-Seq	Lo_et_al.	Homer	TBGCACGCAA	1	0.8493	29	0.1973	8540	0.1771	6.1015
C4	Late-down	STAT5	Stat	mCD4+-Stat5-ChIP-Seq	GSE12346	Homer	RTTTCTNAGAAA	1	0.8493	10	0.068	2659.8	0.0552	6.28542
C4	Late-down	Prop1	Homeobox	GHFT1-PROP1.biotin-ChIP-Seq	GSE77302	Homer	NTAATBNAATTA	1	0.8493	11	0.0748	2963.2	0.0615	6.55312
C4	Late-down	Fox:Ebox	Forkhead,bHLH	Panc1-Foxa2-ChIP-Seq	GSE47459	Homer	NNNVCTGWGYAAACASN	1	0.8591	24	0.1633	7013.6	0.1454	7.01059
C4	Late-down	MYNN	Zf	HEK293-MYNN.eGFP-ChIP-Seq	Encode	Homer	TTCAAAWTAAAAGTC	1	0.8593	6	0.0408	1493.8	0.031	8.24115
C4	Late-down	ZNF264	Zf	HEK293-ZNF264.GFP-ChIP-Seq	GSE58341	Homer	RGGGCACTAACY	1	0.8593	26	0.1769	7653.8	0.1587	6.82124
C4	Late-down	E-box	bHLH	Promoter	NA	Homer	SSGGTCACGTGA	1	0.8593	5	0.034	1205.4	0.025	8.81622
C4	Late-down	CEBP	bZIP	ThioMac-CEBPb-ChIP-Seq	GSE21512	Homer	ATTGCGCAAC	1	0.8593	14	0.0952	3926.7	0.0814	6.12841
C4	Late-down	Atf4	bZIP	MEF-Atf4-ChIP-Seq	GSE35681	Homer	MTGATGCAAT	1	0.87	6	0.0408	1515.4	0.0314	6.54
C4	Late-down	PPARE	NR,DR1	3T3L1-Pparg-ChIP-Seq	GSE13511	Homer	TGACCTTTGCCCCA	1	0.87	31	0.2109	9284.2	0.1925	6.96882
C4	Late-down	FOXM1	Forkhead	MCF7-FOXM1-ChIP-Seq	GSE72977	Homer	TRTTTACTTW	1	0.87	23	0.1565	6760.5	0.1402	7.164
C4	Late-down	TRPS1	Zf	MCF7-TRPS1-ChIP-Seq	GSE107013	Homer	AGATAAGANN	1	0.8756	40	0.2721	12191.2	0.2528	5.50203
C4	Late-down	Phox2a	Homeobox	Neuron-Phox2a-ChIP-Seq	GSE31456	Homer	YTAATYNRATTA	1	0.9038	7	0.0476	1854.8	0.0385	7.17589
C4	Late-down	Pax7	Paired,Homeobox,longest	Myoblast-Pax7-ChIP-Seq	GSE25064	Homer	NTAATTDGCYAATTANNWWD	1	0.9061	1	0.0068	136	0.0028	10.9116
C4	Late-down	p73	p53	Trachea-p73-ChIP-Seq	PRJNA310161	Homer	NRRRCAWGTCCDGRCATGYY	1	0.9108	2	0.0136	399.2	0.0083	9.65302
C4	Late-down	PU.1-IRF	ETS:IRF	Bcell-PU.1-ChIP-Seq	GSE21512	Homer	MGGAAGTGAAAC	1	0.9108	40	0.2721	12282.3	0.2547	6.85196
C4	Late-down	Six1	Homeobox	Myoblast-Six1-ChIP-Chip	GSE20150	Homer	GKVTCADRTTWC	1	0.9108	7	0.0476	1870.2	0.0388	8.09506
C4	Late-down	JunB	bZIP	DendriticCells-Junb-ChIP-Seq	GSE36099	Homer	RATGASTCAT	1	0.9108	12	0.0816	3407.6	0.0707	6.68931
C4	Late-down	Nkx2.5	Homeobox	HL1-Nkx2.5.biotin-ChIP-Seq	GSE21529	Homer	RRSCACTYAA	1	0.921	61	0.415	19136.1	0.3968	5.89817
C4	Late-down	Ascl1	bHLH	NeuralTubes-Ascl1-ChIP-Seq	GSE55840	Homer	NNVVCAGCTGBN	1	0.921	56	0.381	17516.6	0.3633	6.24294
C4	Late-down	HIF2a	bHLH	785_O-HIF2a-ChIP-Seq	GSE34871	Homer	GCACGTACCC	1	0.921	14	0.0952	4068.5	0.0844	6.74272
C4	Late-down	IRF:BATF	IRF:bZIP	pDC-Irf8-ChIP-Seq	GSE66899	Homer	CTTTCANTATGACTV	1	0.9277	3	0.0204	706.8	0.0147	9.61967
C4	Late-down	FOXK1	Forkhead	HEK293-FOXK1-ChIP-Seq	GSE51673	Homer	NVWTGTTTAC	1	0.9277	22	0.1497	6618.5	0.1373	6.33705
C4	Late-down	MITF	bHLH	MastCells-MITF-ChIP-Seq	GSE48085	Homer	RTCATGTGAC	1	0.9345	28	0.1905	8555.8	0.1774	6.35457
C4	Late-down	Bcl6	Zf	Liver-Bcl6-ChIP-Seq	GSE31578	Homer	NNNCTTTCCAGGAAA	1	0.9367	37	0.2517	11458.3	0.2376	6.52264
C4	Late-down	Rfx1	HTH	NPC-H3K4me1-ChIP-Seq	GSE16256	Homer	KGTTGCCATGGCAA	1	0.9367	8	0.0544	2242.1	0.0465	8.05843
C4	Late-down	ZFX	Zf	mES-Zfx-ChIP-Seq	GSE11431	Homer	AGGCCTRG	1	0.9367	51	0.3469	16003.5	0.3319	6.24845
C4	Late-down	ZNF652	NA	HepG2-ZNF652.Flag-ChIP-Seq	Encode	Homer	TTAACCCTTTVNKKN	1	0.9367	6	0.0408	1632.3	0.0339	7.87742
C4	Late-down	THRa	NR	C17.2-THRa-ChIP-Seq	GSE38347	Homer	GGTCANYTGAGGWCA	1	0.9367	15	0.102	4453.8	0.0924	7.77288
C4	Late-down	HOXA2	Homeobox	mES-Hoxa2-ChIP-Seq	Donaldson_et_al.	Homer	GYCATCMATCAT	1	0.9367	3	0.0204	728.3	0.0151	9.38885
C4	Late-down	Foxa3	Forkhead	Liver-Foxa3-ChIP-Seq	GSE77670	Homer	BSNTGTTTACWYWGN	1	0.9395	7	0.0476	1958	0.0406	8.40103
C4	Late-down	GATA	Zf,IR4	iTreg-Gata3-ChIP-Seq	GSE20898	Homer	NAGATWNBNATCTNN	1	0.9414	2	0.0136	444	0.0092	9.53762
C4	Late-down	ZNF317	Zf	HEK293-ZNF317.GFP-ChIP-Seq	GSE58341	Homer	GTCWGCTGTYYCTCT	1	0.9431	3	0.0204	742.8	0.0154	9.52519
C4	Late-down	RUNX	Runt	HPC7-Runx1-ChIP-Seq	GSE22178	Homer	SAAACCACAG	1	0.9431	20	0.1361	6082.1	0.1261	6.62587
C4	Late-down	Hoxa11	Homeobox	ChickenMSG-Hoxa11.Flag-ChIP-Seq	GSE86088	Homer	TTTTATGGCM	1	0.9431	46	0.3129	14469.9	0.3001	5.40132
C4	Late-down	Dlx3	Homeobox	Kerainocytes-Dlx3-ChIP-Seq	GSE89884	Homer	NDGTAATTAC	1	0.9431	12	0.0816	3548	0.0736	5.57497
C4	Late-down	X-box	HTH	NPC-H3K4me1-ChIP-Seq	GSE16256	Homer	GGTTGCCATGGCAA	1	0.9431	4	0.0272	1050	0.0218	9.02111
C4	Late-down	Gata1	Zf	K562-GATA1-ChIP-Seq	GSE18829	Homer	SAGATAAGRV	1	0.9431	12	0.0816	3556.9	0.0738	6.40298
C4	Late-down	Oct4:Sox17	POU,Homeobox,HMG	F9-Sox17-ChIP-Seq	GSE44553	Homer	CCATTGTATGCAAAT	1	0.9431	3	0.0204	750.1	0.0156	8.78869
C4	Late-down	Nanog	Homeobox	mES-Nanog-ChIP-Seq	GSE11724	Homer	RGCCATTAAC	1	0.9431	90	0.6122	28863.9	0.5986	4.45706
C4	Late-down	bHLHE40	bHLH	HepG2-BHLHE40-ChIP-Seq	GSE31477	Homer	KCACGTGMCN	1	0.9431	12	0.0816	3561.1	0.0739	7.06883
C4	Late-down	Egr2	Zf	Thymocytes-Egr2-ChIP-Seq	GSE34254	Homer	NGCGTGGGCGGR	1	0.9431	16	0.1088	4837.1	0.1003	9.1687
C4	Late-down	Brn1	POU,Homeobox	NPC-Brn1-ChIP-Seq	GSE35496	Homer	TATGCWAATBAV	1	0.9431	7	0.0476	1993.8	0.0413	8.42113
C4	Late-down	bHLHE41	bHLH	proB-Bhlhe41-ChIP-Seq	GSE93764	Homer	KCACGTGMCN	1	0.9431	47	0.3197	14891.9	0.3088	5.31838
C4	Late-down	AP-2alpha	AP2	Hela-AP2alpha-ChIP-Seq	GSE31477	Homer	ATGCCCTGAGGC	1	0.9431	43	0.2925	13605.5	0.2822	6.80067
C4	Late-down	Nkx6.1	Homeobox	Islet-Nkx6.1-ChIP-Seq	GSE40975	Homer	GKTAATGR	1	0.9431	46	0.3129	14586	0.3025	4.63307
C4	Late-down	Fra2	bZIP	Striatum-Fra2-ChIP-Seq	GSE43429	Homer	GGATGACTCATC	1	0.9651	10	0.068	3010.6	0.0624	6.38445
C4	Late-down	Chop	bZIP	MEF-Chop-ChIP-Seq	GSE35681	Homer	ATTGCATCAT	1	0.9734	4	0.0272	1115	0.0231	7.62649
C4	Late-down	HNF6	Homeobox	Liver-Hnf6-ChIP-Seq	ERP000394	Homer	NTATYGATCH	1	0.9734	11	0.0748	3346	0.0694	4.57375
C4	Late-down	Pax7	Paired,Homeobox	Myoblast-Pax7-ChIP-Seq	GSE25064	Homer	TAATCAATTA	1	0.9734	2	0.0136	494.1	0.0102	8.51472
C4	Late-down	STAT6	Stat	CD4-Stat6-ChIP-Seq	GSE22104	Homer	ABTTCYYRRGAA	1	0.9734	12	0.0816	3678.5	0.0763	7.32879
C4	Late-down	IRF8	IRF	BMDM-IRF8-ChIP-Seq	GSE77884	Homer	GRAASTGAAAST	1	0.9734	9	0.0612	2719.4	0.0564	8.61756
C4	Late-down	Gata2	Zf	K562-GATA2-ChIP-Seq	GSE18829	Homer	BBCTTATCTS	1	0.9734	13	0.0884	4006	0.0831	6.67483
C4	Late-down	Nkx2.2	Homeobox	NPC-Nkx2.2-ChIP-Seq	GSE61673	Homer	BTBRAGTGSN	1	0.9734	57	0.3878	18306	0.3796	6.13009
C4	Late-down	PBX1	Homeobox	MCF7-PBX1-ChIP-Seq	GSE28007	Homer	GSCTGTCACTCA	1	0.9734	3	0.0204	820	0.017	8.65539
C4	Late-down	ZBTB18	Zf	HEK293-ZBTB18.GFP-ChIP-Seq	GSE58341	Homer	AACATCTGGA	1	0.9734	16	0.1088	5000.1	0.1037	7.77411
C4	Late-down	Pbx3	Homeobox	GM12878-PBX3-ChIP-Seq	GSE32465	Homer	SCTGTCAMTCAN	1	0.9734	8	0.0544	2426.2	0.0503	8.24848
C4	Late-down	Pknox1	Homeobox	ES-Prep1-ChIP-Seq	GSE63282	Homer	SCTGTCAVTCAV	1	0.9734	8	0.0544	2432.3	0.0504	8.29962
C4	Late-down	GATA3	Zf	iTreg-Gata3-ChIP-Seq	GSE20898	Homer	AGATAASR	1	0.9734	29	0.1973	9246.3	0.1918	5.93828
C4	Late-down	Nur77	NR	K562-NR4A1-ChIP-Seq	GSE31363	Homer	TGACCTTTNCNT	1	0.9767	4	0.0272	1157.8	0.024	8.73646
C4	Late-down	p63	p53	Keratinocyte-p63-ChIP-Seq	GSE17611	Homer	NNDRCATGYCYNRRCATGYH	1	0.9767	11	0.0748	3422.5	0.071	6.98559
C4	Late-down	PPARa	NR,DR1	Liver-Ppara-ChIP-Seq	GSE47954	Homer	VNAGGKCAAAGGTCA	1	0.9888	31	0.2109	9960.7	0.2066	7.01326
C4	Late-down	Hoxd11	Homeobox	ChickenMSG-Hoxd11.Flag-ChIP-Seq	GSE86088	Homer	VGCCATAAAA	1	0.9913	48	0.3265	15528.6	0.322	5.52848
C4	Late-down	SpiB	ETS	OCILY3-SPIB-ChIP-Seq	GSE56857	Homer	AAAGRGGAAGTG	1	0.9913	7	0.0476	2154.8	0.0447	8.85312
C4	Late-down	ZNF136	Zf	HEK293-ZNF136.GFP-ChIP-Seq	GSE58341	Homer	YTKGATAHAGTATTCTWGGTNGGCA	1	0.9913	2	0.0136	537.8	0.0112	9.0964
C4	Late-down	EKLF	Zf	Erythrocyte-Klf1-ChIP-Seq	GSE20478	Homer	NWGGGTGTGGCY	1	0.9913	8	0.0544	2484.6	0.0515	9.25088
C4	Late-down	Lhx3	Homeobox	Neuron-Lhx3-ChIP-Seq	GSE31456	Homer	ADBTAATTAR	1	0.9913	31	0.2109	9991.8	0.2072	5.12751
C4	Late-down	Ptf1a	bHLH	Panc1-Ptf1a-ChIP-Seq	GSE47459	Homer	ACAGCTGTTN	1	0.9913	79	0.5374	25718	0.5333	4.78455
C4	Late-down	KLF6	Zf	PDAC-KLF6-ChIP-Seq	GSE64557	Homer	MKGGGYGTGGCC	1	0.9957	61	0.415	19856.8	0.4118	5.44761
C4	Late-down	FOXA1:AR	Forkhead,NR	LNCAP-AR-ChIP-Seq	GSE27824	Homer	AGTAAACAAAAAAGAACAND	1	0.9962	2	0.0136	552.9	0.0115	10.6039
C4	Late-down	Gata6	Zf	HUG1N-GATA6-ChIP-Seq	GSE51936	Homer	YCTTATCTBN	1	0.9984	17	0.1156	5474.5	0.1135	6.28786
C4	Late-down	Smad3	MAD	NPC-Smad3-ChIP-Seq	GSE36673	Homer	TWGTCTGV	1	0.9984	80	0.5442	26107.4	0.5414	6.11917
C4	Late-down	Oct4	POU,Homeobox	mES-Oct4-ChIP-Seq	GSE11431	Homer	ATTTGCATAW	1	0.9984	9	0.0612	2853.3	0.0592	7.32558
C4	Late-down	EHF	ETS	LoVo-EHF-ChIP-Seq	GSE49402	Homer	AVCAGGAAGT	1	0.9984	40	0.2721	13024.8	0.2701	7.21279
C4	Late-down	GATA:SCL	Zf,bHLH	Ter119-SCL-ChIP-Seq	GSE18720	Homer	CRGCTGBNGNSNNSAGATAA	1	0.9984	3	0.0204	891.2	0.0185	8.5623
C4	Late-down	KLF10	Zf	HEK293-KLF10.GFP-ChIP-Seq	GSE58341	Homer	GGGGGTGTGTCC	1	0.9984	32	0.2177	10417.6	0.216	6.71966
C4	Late-down	Hoxa13	Homeobox	ChickenMSG-Hoxa13.Flag-ChIP-Seq	GSE86088	Homer	CYHATAAAAN	1	0.9984	46	0.3129	15034.3	0.3118	5.79616
C4	Late-down	PBX2	Homeobox	K562-PBX2-ChIP-Seq	Encode	Homer	RTGATTKATRGN	1	0.9984	16	0.1088	5188.5	0.1076	6.66559
C4	Late-down	FOXA1	Forkhead	MCF7-FOXA1-ChIP-Seq	GSE26831	Homer	WAAGTAAACA	1	0.9984	19	0.1293	6187.8	0.1283	6.56811
C4	Late-down	Jun-AP1	bZIP	K562-cJun-ChIP-Seq	GSE31477	Homer	GATGASTCATCN	1	0.9984	5	0.034	1572.2	0.0326	8.48626
C4	Late-down	STAT1	Stat	HelaS3-STAT1-ChIP-Seq	GSE12782	Homer	NATTTCCNGGAAAT	1	1	7	0.0476	2255.5	0.0468	7.98429
C4	Late-down	TEAD3	TEA	HepG2-TEAD3-ChIP-Seq	Encode	Homer	TRCATTCCAG	1	1	26	0.1769	8557	0.1775	5.85698
C4	Late-down	ELF3	ETS	PDAC-ELF3-ChIP-Seq	GSE64557	Homer	ANCAGGAAGT	1	1	21	0.1429	6907.5	0.1432	7.58608
C4	Late-down	Lhx2	Homeobox	HFSC-Lhx2-ChIP-Seq	GSE48068	Homer	TAATTAGN	1	1	19	0.1293	6251.3	0.1296	6.1087
C4	Late-down	Hoxb4	Homeobox	ES-Hoxb4-ChIP-Seq	GSE34014	Homer	TGATTRATGGCY	1	1	4	0.0272	1269.3	0.0263	7.99284
C4	Late-down	USF1	bHLH	GM12878-Usf1-ChIP-Seq	GSE32465	Homer	SGTCACGTGR	1	1	15	0.102	4931.7	0.1023	6.62948
C4	Late-down	Phox2b	Homeobox	CLBGA-PHOX2B-ChIP-Seq	GSE90683	Homer	TTAATTNAATTA	1	1	3	0.0204	942.4	0.0195	4.10044
C4	Late-down	GATA3	Zf,DR8	iTreg-Gata3-ChIP-Seq	GSE20898	Homer	AGATSTNDNNDSAGATAASN	1	1	2	0.0136	603.4	0.0125	9.25002
C4	Late-down	Nkx2.1	Homeobox	LungAC-Nkx2.1-ChIP-Seq	GSE43252	Homer	RSCACTYRAG	1	1	75	0.5102	24688.7	0.512	5.68755
C4	Late-down	ZBTB33	Zf	GM12878-ZBTB33-ChIP-Seq	GSE32465	Homer	GGVTCTCGCGAGAAC	1	1	4	0.0272	1282.8	0.0266	7.64806
C4	Late-down	Nkx3.1	Homeobox	LNCaP-Nkx3.1-ChIP-Seq	GSE28264	Homer	AAGCACTTAA	1	1	58	0.3946	19125.6	0.3966	5.53405
C4	Late-down	COUP-TFII	NR	K562-NR2F1-ChIP-Seq	Encode	Homer	GKBCARAGGTCA	1	1	40	0.2721	13225	0.2743	6.40604
C4	Late-down	Mef2b	MADS	HEK293-Mef2b.V5-ChIP-Seq	GSE67450	Homer	GCTATTTTTGGM	1	1	15	0.102	4974.3	0.1032	6.85072
C4	Late-down	Ets1-distal	ETS	CD4+-PolII-ChIP-Seq	Barski_et_al.	Homer	MACAGGAAGT	1	1	8	0.0544	2643.2	0.0548	8.63796
C4	Late-down	NPAS2	bHLH	Liver-NPAS2-ChIP-Seq	GSE39860	Homer	KCCACGTGAC	1	1	32	0.2177	10616.7	0.2202	6.1426
C4	Late-down	HIF-1a	bHLH	MCF7-HIF1a-ChIP-Seq	GSE28352	Homer	TACGTGCV	1	1	9	0.0612	2987.4	0.062	7.05527
C4	Late-down	TCFL2	HMG	K562-TCF7L2-ChIP-Seq	GSE29196	Homer	ACWTCAAAGG	1	1	2	0.0136	623.2	0.0129	7.7909
C4	Late-down	E2A	bHLH	proBcell-E2A-ChIP-Seq	GSE21978	Homer	DNRCAGCTGY	1	1	50	0.3401	16601.7	0.3443	6.42721
C4	Late-down	MafB	bZIP	BMM-Mafb-ChIP-Seq	GSE75722	Homer	WNTGCTGASTCAGCANWTTY	1	1	10	0.068	3358.5	0.0697	6.39362
C4	Late-down	TFE3	bHLH	MEF-TFE3-ChIP-Seq	GSE75757	Homer	GTCACGTGACYV	1	1	3	0.0204	987.4	0.0205	8.32268
C4	Late-down	Zfp57	Zf	H1-ZFP57.HA-ChIP-Seq	GSE115387	Homer	NANTGCSGCA	1	1	26	0.1769	8724.3	0.1809	6.37386
C4	Late-down	FXR	NR,IR1	Liver-FXR-ChIP-Seq	Chong_et_al.	Homer	AGGTCANTGACCTB	1	1	12	0.0816	4070.4	0.0844	6.87316
C4	Late-down	Unknown	Homeobox	Limb-p300-ChIP-Seq	NA	Homer	SSCMATWAAA	1	1	12	0.0816	4088.4	0.0848	6.76582
C4	Late-down	Tbox:Smad	T-box,MAD	ESCd5-Smad2_3-ChIP-Seq	GSE29422	Homer	AGGTGHCAGACA	1	1	5	0.034	1713.8	0.0355	8.77668
C4	Late-down	ZNF165	Zf	WHIM12-ZNF165-ChIP-Seq	GSE65937	Homer	AAGGKGRCGCAGGCA	1	1	7	0.0476	2414.9	0.0501	9.83527
C4	Late-down	PRDM10	Zf	HEK293-PRDM10.eGFP-ChIP-Seq	Encode	Homer	TGGTACATTCCA	1	1	16	0.1088	5471.8	0.1135	7.35354
C4	Late-down	Pit1+1bp	Homeobox	GCrat-Pit1-ChIP-Seq	GSE58009	Homer	ATGCATAATTCA	1	1	5	0.034	1736.7	0.036	7.33824
C4	Late-down	CHR	?	Hela-CellCycle-Expression	NA	Homer	SRGTTTCAAA	1	1	11	0.0748	3812	0.0791	7.76332
C4	Late-down	DMRT1	DM	Testis-DMRT1-ChIP-Seq	GSE64892	Homer	TWGHWACAWTGTWDC	1	1	4	0.0272	1402.1	0.0291	7.68035
C4	Late-down	GRE	NR,IR3	A549-GR-ChIP-Seq	GSE32465	Homer	NRGVACABNVTGTYCY	1	1	3	0.0204	1049.5	0.0218	7.9144
C4	Late-down	NF1:FOXA1	CTF,Forkhead	LNCAP-FOXA1-ChIP-Seq	GSE27824	Homer	WNTGTTTRYTTTGGCA	1	1	1	0.0068	319.2	0.0066	10.2737
C4	Late-down	Rfx5	HTH	GM12878-Rfx5-ChIP-Seq	GSE31477	Homer	SCCTAGCAACAG	1	1	10	0.068	3491.6	0.0724	8.12207
C4	Late-down	NFAT	RHD	Jurkat-NFATC1-ChIP-Seq	Jolma_et_al.	Homer	ATTTTCCATT	1	1	18	0.1224	6211	0.1288	6.82293
C4	Late-down	FoxL2	Forkhead	Ovary-FoxL2-ChIP-Seq	GSE60858	Homer	WWTRTAAACAVG	1	1	15	0.102	5210	0.108	6.23236
C4	Late-down	PSE	SNAPc	K562-mStart-Seq	NA	Homer	WAVTCACCMTAASYDAAAAG	1	1	10	0.068	3534.9	0.0733	7.0549
C4	Late-down	Nrf2	bZIP	Lymphoblast-Nrf2-ChIP-Seq	GSE37589	Homer	HTGCTGAGTCAT	1	1	1	0.0068	337.2	0.007	9.792
C4	Late-down	ZNF692	Zf	HEK293-ZNF692.GFP-ChIP-Seq	GSE58341	Homer	GTGGGCCCCA	1	1	6	0.0408	2164.8	0.0449	8.1892
C4	Late-down	TR4	NR,DR1	Hela-TR4-ChIP-Seq	GSE24685	Homer	GAGGTCAAAGGTCA	1	1	3	0.0204	1095.2	0.0227	9.35237
C4	Late-down	CLOCK	bHLH	Liver-Clock-ChIP-Seq	GSE39860	Homer	GHCACGTG	1	1	16	0.1088	5627.7	0.1167	6.34007
C4	Late-down	ELF5	ETS	T47D-ELF5-ChIP-Seq	GSE30407	Homer	ACVAGGAAGT	1	1	22	0.1497	7667.7	0.159	6.8543
C4	Late-down	Bach1	bZIP	K562-Bach1-ChIP-Seq	GSE31477	Homer	AWWNTGCTGAGTCAT	1	1	1	0.0068	349.4	0.0072	9.34972
C4	Late-down	Fosl2	bZIP	3T3L1-Fosl2-ChIP-Seq	GSE56872	Homer	NATGASTCABNN	1	1	6	0.0408	2184.8	0.0453	7.02941
C4	Late-down	ZNF768	Zf	Rajj-ZNF768-ChIP-Seq	GSE111879	Homer	RHHCAGAGAGGB	1	1	1	0.0068	352.5	0.0073	9.65865
C4	Late-down	Tbr1	T-box	Cortex-Tbr1-ChIP-Seq	GSE71384	Homer	AAGGTGTKAA	1	1	27	0.1837	9370.5	0.1943	6.12153
C4	Late-down	LXRE	NR,DR4	RAW-LXRb.biotin-ChIP-Seq	GSE21512	Homer	RGGTTACTANAGGTCA	1	1	1	0.0068	353.3	0.0073	9.09992
C4	Late-down	RUNX1	Runt	Jurkat-RUNX1-ChIP-Seq	GSE29180	Homer	AAACCACARM	1	1	24	0.1633	8396.6	0.1741	6.64863
C4	Late-down	SPDEF	ETS	VCaP-SPDEF-ChIP-Seq	SRA014231	Homer	ASWTCCTGBT	1	1	31	0.2109	10766.6	0.2233	6.87195
C4	Late-down	PGR	NR	EndoStromal-PGR-ChIP-Seq	GSE69539	Homer	AAGAACATWHTGTTC	1	1	4	0.0272	1506.8	0.0312	7.11747
C4	Late-down	p53	p53	Saos-p53-ChIP-Seq	GSE15780	Homer	RRCATGYCYRGRCATGYYYN	1	1	2	0.0136	767	0.0159	8.59219
C4	Late-down	p53	p53	Saos-p53-ChIP-Seq	NA	Homer	RRCATGYCYRGRCATGYYYN	1	1	2	0.0136	767	0.0159	8.59219
C4	Late-down	THRb	NR	HepG2-THRb.Flag-ChIP-Seq	Encode	Homer	GGTCACCTGAGGTCA	1	1	20	0.1361	7110.2	0.1475	7.16567
C4	Late-down	PRDM1	Zf	Hela-PRDM1-ChIP-Seq	GSE31477	Homer	ACTTTCACTTTC	1	1	13	0.0884	4707.4	0.0976	7.91277
C4	Late-down	Foxa2	Forkhead	Liver-Foxa2-ChIP-Seq	GSE25694	Homer	CYTGTTTACWYW	1	1	14	0.0952	5056.5	0.1049	6.53541
C4	Late-down	E2F3	E2F	MEF-E2F3-ChIP-Seq	GSE71376	Homer	BTKGGCGGGAAA	1	1	40	0.2721	13856.4	0.2874	6.82745
C4	Late-down	NFE2L2	bZIP	HepG2-NFE2L2-ChIP-Seq	Encode	Homer	AWWWTGCTGAGTCAT	1	1	1	0.0068	387.7	0.008	9.88653
C4	Late-down	EWS:ERG-fusion	ETS	CADO_ES1-EWS:ERG-ChIP-Seq	SRA014231	Homer	ATTTCCTGTN	1	1	16	0.1088	5774.5	0.1198	7.33879
C4	Late-down	c-Myc	bHLH	LNCAP-cMyc-ChIP-Seq	Unpublished	Homer	VCCACGTG	1	1	19	0.1293	6812.1	0.1413	6.6135
C4	Late-down	ERE	NR,IR3	MCF7-ERa-ChIP-Seq	Unpublished	Homer	VAGGTCACNSTGACC	1	1	7	0.0476	2643.7	0.0548	7.66658
C4	Late-down	CUX1	Homeobox	K562-CUX1-ChIP-Seq	GSE92882	Homer	TATCGATNAN	1	1	11	0.0748	4063.8	0.0843	6.16664
C4	Late-down	NF-E2	bZIP	K562-NFE2-ChIP-Seq	GSE31477	Homer	GATGACTCAGCA	1	1	1	0.0068	403.9	0.0084	9.74838
C4	Late-down	Brachyury	T-box	Mesoendoderm-Brachyury-ChIP-exo	GSE54963	Homer	ANTTMRCASBNNNGTGYKAAN	1	1	5	0.034	1947.6	0.0404	7.37112
C4	Late-down	OCT:OCT	POU,Homeobox	NPC-OCT6-ChIP-Seq	GSE43916	Homer	YATGCATATRCATRT	1	1	2	0.0136	824.6	0.0171	9.58608
C4	Late-down	RORgt	NR	EL4-RORgt.Flag-ChIP-Seq	GSE56019	Homer	AAYTAGGTCA	1	1	2	0.0136	827.7	0.0172	8.64571
C4	Late-down	RORgt	NR	EL4-RORgt.Flag-ChIP-Seq	GSE56019	Homer	AAYTAGGTCA	1	1	2	0.0136	827.7	0.0172	8.64571
C4	Late-down	RORgt	NR	EL4-RORgt.Flag-ChIP-Seq	GSE56019	Homer	AAYTAGGTCA	1	1	2	0.0136	827.7	0.0172	8.64571
C4	Late-down	RORgt	NR	EL4-RORgt.Flag-ChIP-Seq	GSE56019	Homer	AAYTAGGTCA	1	1	2	0.0136	827.7	0.0172	8.64571
C4	Late-down	DMRT6	DM	Testis-DMRT6-ChIP-Seq	GSE60440	Homer	YDGHTACAWTGTADC	1	1	3	0.0204	1223	0.0254	7.81831
C4	Late-down	TEAD4	TEA	Tropoblast-Tead4-ChIP-Seq	GSE37350	Homer	CCWGGAATGY	1	1	19	0.1293	6933.6	0.1438	7.17274
C4	Late-down	Gata4	Zf	Heart-Gata4-ChIP-Seq	GSE35151	Homer	NBWGATAAGR	1	1	17	0.1156	6261.6	0.1299	6.51598
C4	Late-down	Mouse_Recombination_Hotspot	Zf	Testis-DMC1-ChIP-Seq	GSE24438	Homer	ACTYKNATTCGTGNTACTTC	1	1	1	0.0068	436.2	0.009	9.68214
C4	Late-down	CEBP:AP1	bZIP	ThioMac-CEBPb-ChIP-Seq	GSE21512	Homer	DRTGTTGCAA	1	1	12	0.0816	4536.7	0.0941	6.42862
C4	Late-down	MNT	bHLH	HepG2-MNT-ChIP-Seq	Encode	Homer	DGCACACGTG	1	1	26	0.1769	9388.2	0.1947	4.96758
C4	Late-down	Duxbl	Homeobox	NIH3T3-Duxbl.HA-ChIP-Seq	GSE119782	Homer	TAAYCYAATCAA	1	1	1	0.0068	440.6	0.0091	8.8731
C4	Late-down	Oct11	POU,Homeobox	NCIH1048-POU2F3-ChIP-seq	GSE115123	Homer	GATTTGCATA	1	1	5	0.034	2027.8	0.0421	6.63361
C4	Late-down	NPAS	bHLH	Liver-NPAS-ChIP-Seq	GSE39860	Homer	NVCACGTG	1	1	39	0.2653	13846.8	0.2872	5.41316
C4	Late-down	TEAD1	TEAD	HepG2-TEAD1-ChIP-Seq	Encode	Homer	CYRCATTCCA	1	1	20	0.1361	7402.7	0.1535	4.44236
C4	Late-down	LRF	Zf	Erythroblasts-ZBTB7A-ChIP-Seq	GSE74977	Homer	AAGACCCYYN	1	1	67	0.4558	23184.2	0.4808	6.78566
C4	Late-down	HEB	bHLH	mES-Heb-ChIP-Seq	GSE53233	Homer	VCAGCTGBNN	1	1	59	0.4014	20559.7	0.4264	5.47068
C4	Late-down	GLIS3	Zf	Thyroid-Glis3.GFP-ChIP-Seq	GSE103297	Homer	CTCCCTGGGAGGCCN	1	1	61	0.415	21269.5	0.4411	6.23448
C4	Late-down	HOXB13	Homeobox	ProstateTumor-HOXB13-ChIP-Seq	GSE56288	Homer	TTTTATKRGG	1	1	18	0.1224	6791.5	0.1408	4.26957
C4	Late-down	Lhx1	Homeobox	EmbryoCarcinoma-Lhx1-ChIP-Seq	GSE70957	Homer	NNYTAATTAR	1	1	17	0.1156	6484.6	0.1345	5.97818
C4	Late-down	Elf4	ETS	BMDM-Elf4-ChIP-Seq	GSE88699	Homer	ACTTCCKGKT	1	1	32	0.2177	11705.6	0.2428	6.93529
C4	Late-down	GRE	NR,IR3	RAW264.7-GRE-ChIP-Seq	Unpublished	Homer	VAGRACAKWCTGTYC	1	1	4	0.0272	1762.2	0.0365	7.80986
C4	Late-down	Hand2	bHLH	Mesoderm-Hand2-ChIP-Seq	GSE61475	Homer	TGACANARRCCAGRC	1	1	11	0.0748	4389.1	0.091	8.40959
C4	Late-down	Bach2	bZIP	OCILy7-Bach2-ChIP-Seq	GSE44420	Homer	TGCTGAGTCA	1	1	3	0.0204	1375.2	0.0285	8.69735
C4	Late-down	ERG	ETS	VCaP-ERG-ChIP-Seq	GSE14097	Homer	ACAGGAAGTG	1	1	45	0.3061	16188.6	0.3357	6.43341
C4	Late-down	Esrrb	NR	mES-Esrrb-ChIP-Seq	GSE11431	Homer	KTGACCTTGA	1	1	15	0.102	5882.6	0.122	7.14928
C4	Late-down	MafK	bZIP	C2C12-MafK-ChIP-Seq	GSE36030	Homer	GCTGASTCAGCA	1	1	5	0.034	2204	0.0457	8.22154
C4	Late-down	EBF2	EBF	BrownAdipose-EBF2-ChIP-Seq	GSE97114	Homer	NABTCCCWDGGGAVH	1	1	28	0.1905	10468.1	0.2171	6.63664
C4	Late-down	HLF	bZIP	HSC-HLF.Flag-ChIP-Seq	GSE69817	Homer	RTTATGYAAB	1	1	11	0.0748	4521.1	0.0938	6.20931
C4	Late-down	PRDM15	Zf	ESC-Prdm15-ChIP-Seq	GSE73694	Homer	YCCDNTCCAGGTTTT	1	1	28	0.1905	10567.3	0.2191	6.4143
C4	Late-down	E2F4	E2F	K562-E2F4-ChIP-Seq	GSE31477	Homer	GGCGGGAAAH	1	1	27	0.1837	10225.1	0.212	6.58096
C4	Late-down	BMAL1	bHLH	Liver-Bmal1-ChIP-Seq	GSE39860	Homer	GNCACGTG	1	1	42	0.2857	15380.3	0.319	4.83962
C4	Late-down	EBF1	EBF	Near-E2A-ChIP-Seq	GSE21512	Homer	GTCCCCWGGGGA	1	1	37	0.2517	13689.4	0.2839	6.75203
C4	Late-down	HNF4a	NR,DR1	HepG2-HNF4a-ChIP-Seq	GSE25021	Homer	CARRGKBCAAAGTYCA	1	1	10	0.068	4197.7	0.0871	7.85757
C4	Late-down	E2F1	E2F	Hela-E2F1-ChIP-Seq	GSE22478	Homer	CWGGCGGGAA	1	1	16	0.1088	6388.9	0.1325	7.5313
C4	Late-down	VDR	NR,DR3	GM10855-VDR+vitD-ChIP-Seq	GSE22484	Homer	ARAGGTCANWGAGTTCANNN	1	1	4	0.0272	1900.5	0.0394	8.33047
C4	Late-down	Erra	NR	HepG2-Erra-ChIP-Seq	GSE31477	Homer	CAAAGGTCAG	1	1	59	0.4014	21119.5	0.438	5.74942
C4	Late-down	Oct6	POU,Homeobox	NPC-Pou3f1-ChIP-Seq	GSE35496	Homer	WATGCAAATGAG	1	1	6	0.0408	2704.3	0.0561	7.88155
C4	Late-down	Isl1	Homeobox	Neuron-Isl1-ChIP-Seq	GSE31456	Homer	CTAATKGV	1	1	35	0.2381	13064.8	0.2709	5.47186
C4	Late-down	Pit1	Homeobox	GCrat-Pit1-ChIP-Seq	GSE58009	Homer	ATGMATATDC	1	1	14	0.0952	5719.5	0.1186	6.40158
C4	Late-down	Zfp809	Zf	ES-Zfp809-ChIP-Seq	GSE70799	Homer	GGGGCTYGKCTGGGA	1	1	9	0.0612	3873.4	0.0803	9.01233
C4	Late-down	FoxD3	forkhead	ZebrafishEmbryo-Foxd3.biotin-ChIP-seq	GSE106676	Homer	TGTTTAYTTAGC	1	1	14	0.0952	5723.8	0.1187	7.33682
C4	Late-down	ARE	NR	LNCAP-AR-ChIP-Seq	GSE27824	Homer	RGRACASNSTGTYCYB	1	1	5	0.034	2333.6	0.0484	7.77899
C4	Late-down	NFAT:AP1	RHD,bZIP	Jurkat-NFATC1-ChIP-Seq	Jolma_et_al.	Homer	SARTGGAAAAWRTGAGTCAB	1	1	2	0.0136	1086.8	0.0225	8.95086
C4	Late-down	Max	bHLH	K562-Max-ChIP-Seq	GSE31477	Homer	RCCACGTGGYYN	1	1	17	0.1156	6857.3	0.1422	6.60803
C4	Late-down	ZNF416	Zf	HEK293-ZNF416.GFP-ChIP-Seq	GSE58341	Homer	WDNCTGGGCA	1	1	40	0.2721	14887.5	0.3087	7.03014
C4	Late-down	THRb	NR	Liver-NR1A2-ChIP-Seq	GSE52613	Homer	TRAGGTCA	1	1	92	0.6259	32029.4	0.6642	5.1173
C4	Late-down	EAR2	NR	K562-NR2F6-ChIP-Seq	Encode	Homer	NRBCARRGGTCA	1	1	32	0.2177	12192.8	0.2529	6.65536
C4	Late-down	PU.1	ETS	ThioMac-PU.1-ChIP-Seq	GSE21512	Homer	AGAGGAAGTG	1	1	11	0.0748	4726.2	0.098	7.61317
C4	Late-down	GRHL2	CP2	HBE-GRHL2-ChIP-Seq	GSE46194	Homer	AAACYKGTTWDACMRGTTTB	1	1	6	0.0408	2845	0.059	6.95492
C4	Late-down	TATA-Box	TBP	Promoter	NA	Homer	CCTTTTAWAGSC	1	1	24	0.1633	9490.9	0.1968	5.68259
C4	Late-down	E2F	E2F	Hela-CellCycle-Expression	NA	Homer	TTSGCGCGAAAA	1	1	2	0.0136	1178.2	0.0244	8.4865
C4	Late-down	ZBTB12	Zf	HEK293-ZBTB12.GFP-ChIP-Seq	GSE58341	Homer	NGNTCTAGAACCNGV	1	1	11	0.0748	4813.8	0.0998	7.36575
C4	Late-down	PRDM9	Zf	Testis-DMC1-ChIP-Seq	GSE35498	Homer	ADGGYAGYAGCATCT	1	1	11	0.0748	4829.9	0.1002	8.02355
C4	Late-down	n-Myc	bHLH	mES-nMyc-ChIP-Seq	GSE11431	Homer	VRCCACGTGG	1	1	19	0.1293	7824.8	0.1623	5.71927
C4	Late-down	Elk4	ETS	Hela-Elk4-ChIP-Seq	GSE31477	Homer	NRYTTCCGGY	1	1	23	0.1565	9323.7	0.1934	6.6569
C4	Late-down	HOXA1	Homeobox	mES-Hoxa1-ChIP-Seq	SRP084292	Homer	TGATKGATGR	1	1	3	0.0204	1704.6	0.0354	8.01907
C4	Late-down	Zac1	Zf	Neuro2A-Plagl1-ChIP-Seq	GSE75942	Homer	HAWGRGGCCM	1	1	83	0.5646	29514.1	0.6121	5.51033
C4	Late-down	CDX4	Homeobox	ZebrafishEmbryos-Cdx4.Myc-ChIP-Seq	GSE48254	Homer	NGYCATAAAWCH	1	1	12	0.0816	5317.6	0.1103	6.82675
C4	Late-down	ETV1	ETS	GIST48-ETV1-ChIP-Seq	GSE22441	Homer	AACCGGAAGT	1	1	42	0.2857	15967	0.3311	6.28588
C4	Late-down	Pitx1	Homeobox	Chicken-Pitx1-ChIP-Seq	GSE38910	Homer	TAATCCCN	1	1	76	0.517	27265.8	0.5654	4.69519
C4	Late-down	CEBP:CEBP	bZIP	MEF-Chop-ChIP-Seq	GSE35681	Homer	NTNATGCAAYMNNHTGMAAY	1	1	1	0.0068	743.4	0.0154	9.05353
C4	Late-down	HINFP	Zf	K562-HINFP.eGFP-ChIP-Seq	Encode	Homer	TWVGGTCCGC	1	1	21	0.1429	8646.5	0.1793	6.66582
C4	Late-down	AR-halfsite	NR	LNCaP-AR-ChIP-Seq	GSE27824	Homer	CCAGGAACAG	1	1	89	0.6054	31490.2	0.6531	5.19383
C4	Late-down	c-Myc	bHLH	mES-cMyc-ChIP-Seq	GSE11431	Homer	VVCCACGTGG	1	1	12	0.0816	5377.2	0.1115	6.80884
C4	Late-down	IRF3	IRF	BMDM-Irf3-ChIP-Seq	GSE67343	Homer	AGTTTCAKTTTC	1	1	4	0.0272	2233.1	0.0463	8.90888
C4	Late-down	NFkB-p65	RHD	GM12787-p65-ChIP-Seq	GSE19485	Homer	WGGGGATTTCCC	1	1	10	0.068	4682.9	0.0971	7.18817
C4	Late-down	RARa	NR	K562-RARa-ChIP-Seq	Encode	Homer	TTGAMCTTTG	1	1	61	0.415	22560.2	0.4679	5.64635
C4	Late-down	Oct2	POU,Homeobox	Bcell-Oct2-ChIP-Seq	GSE21512	Homer	ATATGCAAAT	1	1	3	0.0204	1800.1	0.0373	7.58112
C4	Late-down	Pdx1	Homeobox	Islet-Pdx1-ChIP-Seq	SRA008281	Homer	YCATYAATCA	1	1	13	0.0884	5844.7	0.1212	5.93226
C4	Late-down	YY1	Zf	Promoter	NA	Homer	CAAGATGGCGGC	1	1	3	0.0204	1826	0.0379	8.7834
C4	Late-down	Fli1	ETS	CD8-FLI-ChIP-Seq	GSE20898	Homer	NRYTTCCGGH	1	1	36	0.2449	14218.1	0.2949	5.89729
C4	Late-down	Etv2	ETS	ES-ER71-ChIP-Seq	GSE59402	Homer	NNAYTTCCTGHN	1	1	24	0.1633	9990.8	0.2072	7.21376
C4	Late-down	HIF-1b	HLH	T47D-HIF1b-ChIP-Seq	GSE59937	Homer	RTACGTGC	1	1	33	0.2245	13191.6	0.2736	5.71312
C4	Late-down	ETS1	ETS	Jurkat-ETS1-ChIP-Seq	GSE17954	Homer	ACAGGAAGTG	1	1	30	0.2041	12178.7	0.2526	6.52537
C4	Late-down	ERRg	NR	Kidney-ESRRG-ChIP-Seq	GSE104905	Homer	GTGACCTTGRVN	1	1	18	0.1224	7923.2	0.1643	7.03644
C4	Late-down	BMYB	HTH	Hela-BMYB-ChIP-Seq	GSE27030	Homer	NHAACBGYYV	1	1	31	0.2109	12639	0.2621	6.19438
C4	Late-down	Gli2	Zf	GM2-Gli2-ChIP-Chip	GSE112702	Homer	YSTGGGTGGTCT	1	1	6	0.0408	3261.6	0.0676	8.36738
C4	Late-down	TEAD2	TEA	Py2T-Tead2-ChIP-Seq	GSE55709	Homer	CCWGGAATGY	1	1	8	0.0544	4104.2	0.0851	7.34798
C4	Late-down	ZNF341	Zf	EBV-ZNF341-ChIP-Seq	GSE113194	Homer	GGAACAGCCG	1	1	21	0.1429	9090.3	0.1885	7.22693
C4	Late-down	E2F6	E2F	Hela-E2F6-ChIP-Seq	GSE31477	Homer	GGCGGGAARN	1	1	30	0.2041	12348.6	0.2561	7.14891
C4	Late-down	Cdx2	Homeobox	mES-Cdx2-ChIP-Seq	GSE14586	Homer	GYMATAAAAH	1	1	8	0.0544	4129.1	0.0856	6.98658
C4	Late-down	EWS:FLI1-fusion	ETS	SK_N_MC-EWS:FLI1-ChIP-Seq	SRA014231	Homer	VACAGGAAAT	1	1	14	0.0952	6591.5	0.1367	4.87542
C4	Late-down	ZNF711	Zf	SHSY5Y-ZNF711-ChIP-Seq	GSE20673	Homer	AGGCCTAG	1	1	65	0.4422	24459.4	0.5072	6.10193
C4	Late-down	AMYB	HTH	Testes-AMYB-ChIP-Seq	GSE44588	Homer	TGGCAGTTGG	1	1	33	0.2245	13599.7	0.282	5.00906
C4	Late-down	MYB	HTH	ERMYB-Myb-ChIPSeq	GSE22095	Homer	GGCVGTTR	1	1	40	0.2721	16125.9	0.3344	2.20058
C4	Late-down	Six2	Homeobox	NephronProgenitor-Six2-ChIP-Seq	GSE39837	Homer	GWAAYHTGAKMC	1	1	16	0.1088	7511.3	0.1558	6.53718
C4	Late-down	Bapx1	Homeobox	VertebralCol-Bapx1-ChIP-Seq	GSE36672	Homer	TTRAGTGSYK	1	1	46	0.3129	18313.1	0.3798	6.03763
C4	Late-down	ZNF669	Zf	HEK293-ZNF669.GFP-ChIP-Seq	GSE58341	Homer	GARTGGTCATCGCCC	1	1	1	0.0068	1071.5	0.0222	8.24108
C4	Late-down	IRF1	IRF	PBMC-IRF1-ChIP-Seq	GSE43036	Homer	GAAAGTGAAAGT	1	1	1	0.0068	1087.6	0.0226	9.68899
C4	Late-down	EBF	EBF	proBcell-EBF-ChIP-Seq	GSE21978	Homer	DGTCCCYRGGGA	1	1	4	0.0272	2679	0.0556	8.59001
C4	Late-down	Eomes	T-box	H9-Eomes-ChIP-Seq	GSE26097	Homer	ATTAACACCT	1	1	35	0.2381	14726.1	0.3054	5.43685
C4	Late-down	CRX	Homeobox	Retina-Crx-ChIP-Seq	GSE20012	Homer	GCTAATCC	1	1	41	0.2789	16880.5	0.3501	4.85243
C4	Late-down	GSC	Homeobox	FrogEmbryos-GSC-ChIP-Seq	DRA000576	Homer	RGGATTAR	1	1	17	0.1156	8202.8	0.1701	6.27719
C4	Late-down	Tcfcp2l1	CP2	mES-Tcfcp2l1-ChIP-Seq	GSE11431	Homer	NRAACCRGTTYRAACCRGYT	1	1	2	0.0136	1807.4	0.0375	8.04087
C4	Late-down	TEAD	TEA	Fibroblast-PU.1-ChIP-Seq	Unpublished	Homer	YCWGGAATGY	1	1	8	0.0544	4637.6	0.0962	8.29002
C4	Late-down	ZNF519	Zf	HEK293-ZNF519.GFP-ChIP-Seq	GSE58341	Homer	GAGSCCGAGC	1	1	10	0.068	5527.1	0.1146	7.96525
C4	Late-down	Twist	bHLH	HMLE-TWIST1-ChIP-Seq	Chang_et_al	Homer	VCAKCTGGNNNCCAGMTGBN	1	1	1	0.0068	1240.3	0.0257	9.10017
C4	Late-down	E2F7	E2F	Hela-E2F7-ChIP-Seq	GSE32673	Homer	VDTTTCCCGCCA	1	1	4	0.0272	2936.7	0.0609	8.69074
C4	Late-down	Bcl11a	Zf	HSPC-BCL11A-ChIP-Seq	GSE104676	Homer	TYTGACCASWRG	1	1	12	0.0816	6447.7	0.1337	7.30715
C4	Late-down	GABPA	ETS	Jurkat-GABPa-ChIP-Seq	GSE17954	Homer	RACCGGAAGT	1	1	24	0.1633	11157.9	0.2314	6.58177
C4	Late-down	IRF4	IRF	GM12878-IRF4-ChIP-Seq	GSE32465	Homer	ACTGAAACCA	1	1	4	0.0272	3020.1	0.0626	7.36904
C4	Late-down	GLI3	Zf	Limb-GLI3-ChIP-Chip	GSE11077	Homer	CGTGGGTGGTCC	1	1	1	0.0068	1379.7	0.0286	8.5549
C4	Late-down	Otx2	Homeobox	EpiLC-Otx2-ChIP-Seq	GSE56098	Homer	NYTAATCCYB	1	1	10	0.068	5895.9	0.1223	6.67091
C4	Late-down	Tbet	T-box	CD8-Tbet-ChIP-Seq	GSE33802	Homer	AGGTGTGAAM	1	1	13	0.0884	7202.9	0.1494	6.74206
C4	Late-down	Elk1	ETS	Hela-Elk1-ChIP-Seq	GSE31477	Homer	HACTTCCGGY	1	1	18	0.1224	9284.1	0.1925	6.72183
C4	Late-down	ELF1	ETS	Jurkat-ELF1-ChIP-Seq	SRA014231	Homer	AVCCGGAAGT	1	1	16	0.1088	8513.4	0.1766	6.81931
C4	Late-down	CArG	MADS	PUER-Srf-ChIP-Seq	Sullivan_et_al.	Homer	CCATATATGGNM	1	1	2	0.0136	2217.7	0.046	6.91146
C4	Late-down	NFkB-p50,p52	RHD	Monocyte-p50-ChIP-Chip	Schreiber_et_al.	Homer	GGGGGAATCCCC	1	1	1	0.0068	1750.1	0.0363	8.67192
C4	Late-down	Tbx21	T-box	GM12878-TBX21-ChIP-Seq	Encode	Homer	AGGTGTGAAA	1	1	11	0.0748	6827.8	0.1416	6.62472
C4	Late-down	ETV4	ETS	HepG2-ETV4-ChIP-Seq	ENCODE	Homer	ACCGGAAGTG	1	1	32	0.2177	15074.8	0.3126	6.20352
C4	Late-down	Tbx5	T-box	HL1-Tbx5.biotin-ChIP-Seq	GSE21529	Homer	AGGTGTCA	1	1	64	0.4354	26381.3	0.5471	5.41231
C4	Late-down	ETS	ETS	Promoter	NA	Homer	AACCGGAAGT	1	1	7	0.0476	5329.2	0.1105	7.14795
C4	Late-down	Nr5a2	NR	mES-Nr5a2-ChIP-Seq	GSE19019	Homer	BTCAAGGTCA	1	1	7	0.0476	5595.4	0.116	7.61376
C4	Late-down	SF1	NR	H295R-Nr5a1-ChIP-Seq	GSE44220	Homer	CAAGGHCANV	1	1	5	0.034	4776.2	0.099	6.51408
C4	Late-down	ZEB2	Zf	SNU398-ZEB2-ChIP-Seq	GSE103048	Homer	GNMCAGGTGTGC	1	1	20	0.1361	11470.1	0.2379	6.93338
C4	Late-down	Slug	Zf	Mesoderm-Snai2-ChIP-Seq	GSE61475	Homer	SNGCACCTGCHS	1	1	9	0.0612	7020	0.1456	7.2621
C4	Late-down	SCRT1	Zf	HEK293-SCRT1.eGFP-ChIP-Seq	Encode	Homer	GCAACAGGTG	1	1	1	0.0068	2860.1	0.0593	6.32471
C4	Late-down	Tbx6	T-box	ESC-Tbx6-ChIP-Seq	GSE93524	Homer	DAGGTGTBAA	1	1	11	0.0748	8775.6	0.182	6.34926
C4	Late-down	E2A	bHLH,near_PU.1	Bcell-PU.1-ChIP-Seq	GSE21512	Homer	NVCACCTGBN	1	1	27	0.1837	15835.7	0.3284	7.41752
C4	Late-down	Nr5a2	NR	Pancreas-LRH1-ChIP-Seq	GSE34295	Homer	BTCAAGGTCA	1	1	7	0.0476	7199.1	0.1493	7.02113
C4	Late-down	ZEB1	Zf	PDAC-ZEB1-ChIP-Seq	GSE64557	Homer	VCAGGTRDRY	1	1	30	0.2041	18430	0.3822	5.94141
C4	Late-down	Brn2	POU,Homeobox	NPC-Brn2-ChIP-Seq	GSE35496	Homer	ATGAATATTC	1	1	0	0	497.2	0.0103	9.45437
C4	Late-down	CTCF-SatelliteElement	Zf?	CD4+-CTCF-ChIP-Seq	Barski_et_al.	Homer	TGCAGTTCCMVNWRTGGCCA	1	1	0	0	128.8	0.0027	11.1597
C4	Late-down	DUX4	Homeobox	Myoblasts-DUX4.V5-ChIP-Seq	GSE75791	Homer	NWTAAYCYAATCAWN	1	1	0	0	257.6	0.0053	10.3594
C4	Late-down	DUX	Homeobox	C2C12-Dux-ChIP-Seq	GSE87279	Homer	BCWGATTCAATCAAN	1	1	0	0	11.7	0.0002	12.6144
C4	Late-down	EBNA1	EBV-virus	Raji-EBNA1-ChIP-Seq	GSE30709	Homer	GGYAGCAYDTGCTDCCCNNN	1	1	0	0	147	0.003	11.187
C4	Late-down	ETS:E-box	ETS,bHLH	HPC7-Scl-ChIP-Seq	GSE22178	Homer	AGGAARCAGCTG	1	1	0	0	771.2	0.016	10.0153
C4	Late-down	ETS:RUNX	ETS,Runt	Jurkat-RUNX1-ChIP-Seq	GSE17954	Homer	RCAGGATGTGGT	1	1	0	0	1107.3	0.023	8.58104
C4	Late-down	GFX	?	Promoter	NA	Homer	ATTCTCGCGAGA	1	1	0	0	422.3	0.0088	9.30792
C4	Late-down	HNF1b	Homeobox	PDAC-HNF1B-ChIP-Seq	GSE64557	Homer	GTTAATNATTAA	1	1	0	0	713.6	0.0148	8.55189
C4	Late-down	Hnf1	Homeobox	Liver-Foxa2-Chip-Seq	GSE25694	Homer	GGTTAAWCATTAA	1	1	0	0	617	0.0128	8.86614
C4	Late-down	IRF2	IRF	Erythroblas-IRF2-ChIP-Seq	GSE36985	Homer	GAAASYGAAASY	1	1	0	0	878	0.0182	8.04207
C4	Late-down	ISRE	IRF	ThioMac-LPS-Expression	GSE23622	Homer	AGTTTCASTTTC	1	1	0	0	431.8	0.009	10.5125
C4	Late-down	NFkB-p65-Rel	RHD	ThioMac-LPS-Expression	GSE23622	Homer	GGAAATTCCC	1	1	0	0	441.5	0.0092	9.2299
C4	Late-down	OCT:OCT	POU,Homeobox	NPC-Brn1-ChIP-Seq	GSE35496	Homer	ATGAATATTCATGAG	1	1	0	0	51.9	0.0011	12.3184
C4	Late-down	Pax7	Paired,Homeobox,long	Myoblast-Pax7-ChIP-Seq	GSE25064	Homer	TAATCHGATTAC	1	1	0	0	94.2	0.002	9.80349
C4	Late-down	RARg	NR	ES-RARg-ChIP-Seq	GSE30538	Homer	AGGTCAAGGTCA	1	1	0	0	772.7	0.016	11.1266
C4	Late-down	RORa	NR	Liver-Rora-ChIP-Seq	GSE101115	Homer	AAWCTAGGTCARDNN	1	1	0	0	898	0.0186	9.12099
C4	Late-down	RORg	NR	Liver-Rorc-ChIP-Seq	GSE101115	Homer	WAABTAGGTCAV	1	1	0	0	535.1	0.0111	9.09674
C4	Late-down	Six4	Homeobox	MCF7-SIX4-ChIP-Seq	Encode	Homer	TGWAAYCTGABACCB	1	1	0	0	355.2	0.0074	9.91365
C4	Late-down	ZFP3	Zf	HEK293-ZFP3.GFP-ChIP-Seq	GSE58341	Homer	GGGTTTTGAAGGATGARTAGGAGTT	1	1	0	0	8	0.0002	6.71656
C4	Late-down	ZNF382	Zf	HEK293-ZNF382.GFP-ChIP-Seq	GSE58341	Homer	GNCTGTASTRNTGBCTCHTT	1	1	0	0	211.2	0.0044	10.5743
C4	Late-down	ZNF41	Zf	HEK293-ZNF41.GFP-ChIP-Seq	GSE58341	Homer	CCTCATGGTGYCYTWYTCCCTTGTG	1	1	0	0	243.1	0.005	10.7364
C4	Late-down	ZNF528	Zf	HEK293-ZNF528.GFP-ChIP-Seq	GSE58341	Homer	AGAAATGACTTCCCT	1	1	0	0	53.4	0.0011	12.8603
