# Supplementary material for: Single-nucleus multiomic profiling of the aging mouse substantia nigra reveals conserved gene alterations linked to Parkinson's disease
Source: HighWire-hosted journal article supplement (doi:10.1101/gr.281113.125), 2026-04
Supplement: Supplemental_Table_S5.xlsx [file Supplemental_Table_S5.xlsx]

## Sheet: Supplemental_Table_S5
Supplemental Table S5: Associations between cCRE and gene links across all cell subclasses
Cell subclass	cCRE-gene link	beta	boot_basic_p	fdr
016 CA1-ProS Glut	Nav3_Chr10:110773749-110774248	0.335312	4e-05	0.0289575
016 CA1-ProS Glut	Rab21_Chr10:115333491-115333990	0.443397	0.0002	0.0888736
016 CA1-ProS Glut	Kcnmb4os2_Chr10:116645660-116646159	1.15396	4e-05	0.0289575
016 CA1-ProS Glut	Stat6_Chr10:127326134-127326633	-16.6277	4e-05	0.0289575
016 CA1-ProS Glut	Map7_Chr10:20175941-20176440	0.535619	4e-05	0.0289575
016 CA1-ProS Glut	Map7_Chr10:20202659-20203158	0.408238	4e-05	0.0289575
016 CA1-ProS Glut	Cdk19_Chr10:40445884-40446383	0.473404	4e-05	0.0289575
016 CA1-ProS Glut	Cdk19_Chr10:40499691-40500190	0.525077	4e-05	0.0289575
016 CA1-ProS Glut	Cdk19_Chr10:40516358-40516857	0.635671	4e-05	0.0289575
016 CA1-ProS Glut	Asf1a_Chr10:53503089-53503588	0.911491	4e-05	0.0289575
016 CA1-ProS Glut	Ascc1_Chr10:60064013-60064512	0.670691	0.00016	0.0780818
016 CA1-ProS Glut	Fam13c_Chr10:70379892-70380391	0.543851	8e-05	0.0496884
016 CA1-ProS Glut	Dip2a_Chr10:76317492-76317991	0.467443	4e-05	0.0289575
016 CA1-ProS Glut	Ilvbl_Chr10:78159839-78160338	0.718684	4e-05	0.0289575
016 CA1-ProS Glut	Ilvbl_Chr10:78487625-78488124	0.901051	4e-05	0.0289575
016 CA1-ProS Glut	Tcf3_Chr10:80339968-80340467	0.811543	0.00012	0.0638333
016 CA1-ProS Glut	Slc39a3_Chr10:80971599-80972098	0.614388	8e-05	0.0496884
016 CA1-ProS Glut	Dot1l_Chr10:81172993-81173492	0.3343	0.00016	0.0780818
016 CA1-ProS Glut	Gna11_Chr10:81411385-81411884	0.552431	4e-05	0.0289575
016 CA1-ProS Glut	Tcp11l2_Chr10:84450588-84451087	0.825706	8e-05	0.0496884
016 CA1-ProS Glut	Nuak1_Chr10:84515381-84515880	0.824557	4e-05	0.0289575
016 CA1-ProS Glut	Polr3b_Chr10:84774534-84775033	0.625605	8e-05	0.0496884
016 CA1-ProS Glut	Metap2_Chr10:93888933-93889432	0.363502	0.00012	0.0638333
016 CA1-ProS Glut	Ndufa12_Chr10:93889574-93890073	0.270125	0.00016	0.0780818
016 CA1-ProS Glut	Phlpp1_Chr1:106155231-106155730	0.434248	4e-05	0.0289575
016 CA1-ProS Glut	Cnp_Chr11:100168939-100169438	0.605972	4e-05	0.0289575
016 CA1-ProS Glut	Cnp_Chr11:100352024-100352523	0.491683	0.0002	0.0888736
016 CA1-ProS Glut	Cnp_Chr11:100571033-100571532	0.491917	4e-05	0.0289575
016 CA1-ProS Glut	Rpl27_Chr11:101211809-101212308	0.490184	4e-05	0.0289575
016 CA1-ProS Glut	Ern1_Chr11:106627643-106628142	0.761178	4e-05	0.0289575
016 CA1-ProS Glut	Prkca_Chr11:108020698-108021197	0.965209	4e-05	0.0289575
016 CA1-ProS Glut	Prkca_Chr11:108025638-108026137	0.71275	0.0002	0.0888736
016 CA1-ProS Glut	Prkca_Chr11:108150232-108150731	0.735977	4e-05	0.0289575
016 CA1-ProS Glut	Abca8a_Chr11:109860504-109861003	0.803616	0.00012	0.0638333
016 CA1-ProS Glut	2610035D17Rik_Chr11:113188264-113188763	0.797276	4e-05	0.0289575
016 CA1-ProS Glut	Ttyh2_Chr11:114690161-114690660	1.10885	4e-05	0.0289575
016 CA1-ProS Glut	Ttyh2_Chr11:114703858-114704357	0.945657	4e-05	0.0289575
016 CA1-ProS Glut	Kctd2_Chr11:115699250-115699749	0.476931	0.00012	0.0638333
016 CA1-ProS Glut	Wbp2_Chr11:115992037-115992536	0.552582	4e-05	0.0289575
016 CA1-ProS Glut	Srsf2_Chr11:117056826-117057325	0.272456	0.0002	0.0888736
016 CA1-ProS Glut	Aatk_Chr11:120016931-120017430	0.411621	4e-05	0.0289575
016 CA1-ProS Glut	Hgs_Chr11:120139200-120139699	0.696223	4e-05	0.0289575
016 CA1-ProS Glut	Aatk_Chr11:120223789-120224288	0.446989	4e-05	0.0289575
016 CA1-ProS Glut	Plek_Chr11:17486887-17487386	0.757968	8e-05	0.0496884
016 CA1-ProS Glut	Lgalsl_Chr11:21149399-21149898	0.656129	4e-05	0.0289575
016 CA1-ProS Glut	Ehbp1_Chr11:21863953-21864452	-0.22758	0.00024	0.0995654
016 CA1-ProS Glut	Nckap5_Chr1:127252878-127253377	-15.4302	4e-05	0.0289575
016 CA1-ProS Glut	Nucks1_Chr1:132199891-132200390	0.629801	4e-05	0.0289575
016 CA1-ProS Glut	Csrp1_Chr1:135782674-135783173	0.661412	0.00012	0.0638333
016 CA1-ProS Glut	Slc35e4_Chr11:3774770-3775269	0.820254	0.00016	0.0780818
016 CA1-ProS Glut	Rack1_Chr11:48856360-48856859	0.340427	0.00016	0.0780818
016 CA1-ProS Glut	Mrnip_Chr11:50108708-50109207	0.872489	4e-05	0.0289575
016 CA1-ProS Glut	E330020D12Rik_Chr1:152956168-152956667	0.746316	8e-05	0.0496884
016 CA1-ProS Glut	Shcbp1l_Chr1:153065509-153066008	0.986013	0.00016	0.0780818
016 CA1-ProS Glut	Glul_Chr1:153994832-153995331	0.640002	4e-05	0.0289575
016 CA1-ProS Glut	Glul_Chr1:153997122-153997621	0.786854	4e-05	0.0289575
016 CA1-ProS Glut	Glul_Chr1:154156647-154157146	0.696615	4e-05	0.0289575
016 CA1-ProS Glut	Sparc_Chr11:55419215-55419714	1.17664	8e-05	0.0496884
016 CA1-ProS Glut	Tmem11_Chr11:60385084-60385583	0.708047	4e-05	0.0289575
016 CA1-ProS Glut	Kcnj12_Chr11:60736998-60737497	0.522988	0.00016	0.0780818
016 CA1-ProS Glut	Ubb_Chr11:62613609-62614108	0.158398	0.0002	0.0888736
016 CA1-ProS Glut	Rnf227_Chr11:69366357-69366856	0.435656	8e-05	0.0496884
016 CA1-ProS Glut	Trp53_Chr11:69510709-69511208	-16.1729	4e-05	0.0289575
016 CA1-ProS Glut	Efnb3_Chr11:69561433-69561932	0.853826	4e-05	0.0289575
016 CA1-ProS Glut	Eif4a1_Chr11:69561433-69561932	0.370573	4e-05	0.0289575
016 CA1-ProS Glut	Camta2_Chr11:70510012-70510511	0.668673	4e-05	0.0289575
016 CA1-ProS Glut	Wscd1_Chr11:71422184-71422683	0.750629	4e-05	0.0289575
016 CA1-ProS Glut	Wscd1_Chr11:71758431-71758930	0.579682	0.00012	0.0638333
016 CA1-ProS Glut	Wscd1_Chr11:72233982-72234481	0.68628	8e-05	0.0496884
016 CA1-ProS Glut	Kcnj10_Chr1:172342778-172343277	1.23044	4e-05	0.0289575
016 CA1-ProS Glut	Kcnj10_Chr1:172349785-172350284	1.10946	4e-05	0.0289575
016 CA1-ProS Glut	Ube2g1_Chr11:72933511-72934010	0.251431	0.0002	0.0888736
016 CA1-ProS Glut	Aspa_Chr11:73284348-73284847	0.856124	4e-05	0.0289575
016 CA1-ProS Glut	Kmo_Chr1:175128513-175129012	0.764936	0.00024	0.0995654
016 CA1-ProS Glut	Gosr1_Chr11:76581045-76581544	0.579509	8e-05	0.0496884
016 CA1-ProS Glut	Ccnq_Chr11:78366082-78366581	-15.4669	4e-05	0.0289575
016 CA1-ProS Glut	Aldoc_Chr11:78490661-78491160	0.461007	8e-05	0.0496884
016 CA1-ProS Glut	Kif26b_Chr1:178744406-178744905	0.46171	8e-05	0.0496884
016 CA1-ProS Glut	Tmem63a_Chr1:180945562-180946061	0.842732	0.00024	0.0995654
016 CA1-ProS Glut	1700047M11Rik_Chr1:182090021-182090520	0.818599	4e-05	0.0289575
016 CA1-ProS Glut	1700047M11Rik_Chr1:182474882-182475381	1.27735	4e-05	0.0289575
016 CA1-ProS Glut	Sept4_Chr11:87581858-87582357	0.480298	4e-05	0.0289575
016 CA1-ProS Glut	Lpgat1_Chr1:191784988-191785487	0.383751	4e-05	0.0289575
016 CA1-ProS Glut	Itga3_Chr11:95046901-95047400	0.635615	0.00012	0.0638333
016 CA1-ProS Glut	Arhgap23_Chr11:97063222-97063721	0.566757	4e-05	0.0289575
016 CA1-ProS Glut	Arhgap23_Chr11:97289759-97290258	0.566164	4e-05	0.0289575
016 CA1-ProS Glut	Pcgf2_Chr11:97328075-97328574	0.868791	0.0002	0.0888736
016 CA1-ProS Glut	Arhgap23_Chr11:97419122-97419621	0.395087	8e-05	0.0496884
016 CA1-ProS Glut	Kcnk13_Chr12:100073035-100073534	0.779636	0.00012	0.0638333
016 CA1-ProS Glut	Tdp1_Chr12:100166101-100166600	0.725952	0.0002	0.0888736
016 CA1-ProS Glut	Ifi27_Chr12:103144055-103144554	1.036	8e-05	0.0496884
016 CA1-ProS Glut	Hsp90aa1_Chr12:111199790-111200289	0.224198	0.00024	0.0995654
016 CA1-ProS Glut	Zfyve21_Chr12:111648210-111648709	1.09159	4e-05	0.0289575
016 CA1-ProS Glut	Pacs2_Chr12:112593284-112593783	0.544982	0.00016	0.0780818
016 CA1-ProS Glut	Adssl1_Chr12:112605681-112606180	0.773355	4e-05	0.0289575
016 CA1-ProS Glut	Cep170b_Chr12:112869798-112870297	0.576215	0.0002	0.0888736
016 CA1-ProS Glut	Lratd1_Chr12:14114619-14115118	1.31271	4e-05	0.0289575
016 CA1-ProS Glut	Iah1_Chr12:21097640-21098139	0.398695	4e-05	0.0289575
016 CA1-ProS Glut	Ywhaq_Chr12:21425829-21426328	0.395135	4e-05	0.0289575
016 CA1-ProS Glut	Sh3yl1_Chr12:31374524-31375023	1.06443	0.00012	0.0638333
016 CA1-ProS Glut	Gm16267_Chr12:33592926-33593425	0.912552	4e-05	0.0289575
016 CA1-ProS Glut	Hdac9_Chr12:34516597-34517096	0.189781	0.00012	0.0638333
016 CA1-ProS Glut	Ptrhd1_Chr12:4696708-4697207	-15.8599	4e-05	0.0289575
016 CA1-ProS Glut	Sf3b6_Chr12:5268114-5268613	0.452377	0.0002	0.0888736
016 CA1-ProS Glut	Rps29_Chr12:69360618-69361117	0.39249	4e-05	0.0289575
016 CA1-ProS Glut	Gm40437_Chr12:71049503-71050002	0.922766	4e-05	0.0289575
016 CA1-ProS Glut	Psma3_Chr12:71440798-71441297	0.290809	0.00012	0.0638333
016 CA1-ProS Glut	Plekhg3_Chr12:76507639-76508138	1.20072	4e-05	0.0289575
016 CA1-ProS Glut	Mpp5_Chr12:79035296-79035795	0.846571	4e-05	0.0289575
016 CA1-ProS Glut	Plekhh1_Chr12:79035296-79035795	0.917272	4e-05	0.0289575
016 CA1-ProS Glut	Zfp36l1_Chr12:80239276-80239775	0.99941	4e-05	0.0289575
016 CA1-ProS Glut	Isca2_Chr12:84545934-84546433	0.601741	4e-05	0.0289575
016 CA1-ProS Glut	Tdp1_Chr12:99609598-99610097	0.683098	0.0002	0.0888736
016 CA1-ProS Glut	Erbin_Chr13:104039714-104040213	0.424081	0.00016	0.0780818
016 CA1-ProS Glut	1110046J04Rik_Chr13:34025246-34025745	0.801221	0.00016	0.0780818
016 CA1-ProS Glut	Mcur1_Chr13:43795271-43795770	0.795503	0.00012	0.0638333
016 CA1-ProS Glut	Spock1_Chr13:58158476-58158975	-0.210036	0.0002	0.0888736
016 CA1-ProS Glut	Ell2_Chr13:75293405-75293904	0.345879	4e-05	0.0289575
016 CA1-ProS Glut	Arrdc3_Chr13:80947487-80947986	0.84844	4e-05	0.0289575
016 CA1-ProS Glut	Aggf1_Chr13:95634535-95635034	0.699418	4e-05	0.0289575
016 CA1-ProS Glut	Ptcd2_Chr13:99609304-99609803	0.685984	0.00012	0.0638333
016 CA1-ProS Glut	Slain1_Chr14:103682498-103682997	0.490373	4e-05	0.0289575
016 CA1-ProS Glut	Gpc5_Chr14:115201320-115201819	1.12689	4e-05	0.0289575
016 CA1-ProS Glut	Camk2g_Chr14:20661720-20662219	0.444207	8e-05	0.0496884
016 CA1-ProS Glut	Cacna2d3_Chr14:29410850-29411349	-0.33525	0.00012	0.0638333
016 CA1-ProS Glut	Chdh_Chr14:29519933-29520432	1.23245	4e-05	0.0289575
016 CA1-ProS Glut	Spcs1_Chr14:31206524-31207023	0.291518	4e-05	0.0289575
016 CA1-ProS Glut	Gpr45_Chr1:43445990-43446489	0.421129	0.00024	0.0995654
016 CA1-ProS Glut	Cmtm5_Chr14:55054965-55055464	0.754396	4e-05	0.0289575
016 CA1-ProS Glut	Tm9sf1_Chr14:55743653-55744152	0.79065	0.00012	0.0638333
016 CA1-ProS Glut	Zdhhc20_Chr14:57909233-57909732	0.334442	0.00012	0.0638333
016 CA1-ProS Glut	Mir124a-1hg_Chr14:64323484-64323983	0.209526	4e-05	0.0289575
016 CA1-ProS Glut	Fzd3_Chr14:64774128-64774627	0.456206	0.00024	0.0995654
016 CA1-ProS Glut	Clu_Chr14:66182590-66183089	1.20103	4e-05	0.0289575
016 CA1-ProS Glut	Pdlim2_Chr14:70528104-70528603	1.27614	4e-05	0.0289575
016 CA1-ProS Glut	Esd_Chr14:75035974-75036473	0.555908	4e-05	0.0289575
016 CA1-ProS Glut	Tpt1_Chr14:75834153-75834652	0.236888	0.00024	0.0995654
016 CA1-ProS Glut	Nr4a1_Chr15:100775361-100775860	0.586207	0.00012	0.0638333
016 CA1-ProS Glut	Myg1_Chr15:102146864-102147363	0.887075	4e-05	0.0289575
016 CA1-ProS Glut	Copz1_Chr15:103307065-103307564	0.650728	0.00012	0.0638333
016 CA1-ProS Glut	Polr2k_Chr15:36532339-36532838	0.585294	4e-05	0.0289575
016 CA1-ProS Glut	Ubr5_Chr15:38283789-38284288	-0.323457	0.00016	0.0780818
016 CA1-ProS Glut	Plcl1_Chr1:55454002-55454501	0.954445	4e-05	0.0289575
016 CA1-ProS Glut	Enpp2_Chr15:54935469-54935968	0.623885	4e-05	0.0289575
016 CA1-ProS Glut	Plcl1_Chr1:55748302-55748801	0.649705	4e-05	0.0289575
016 CA1-ProS Glut	Ndrg1_Chr15:66951681-66952180	0.733258	0.00024	0.0995654
016 CA1-ProS Glut	Lrrc24_Chr15:76624826-76625325	0.655311	4e-05	0.0289575
016 CA1-ProS Glut	Arhgap39_Chr15:76656731-76657230	0.345645	4e-05	0.0289575
016 CA1-ProS Glut	Pdxp_Chr15:78611020-78611519	0.613935	8e-05	0.0496884
016 CA1-ProS Glut	Sox10_Chr15:78849912-78850411	0.807181	4e-05	0.0289575
016 CA1-ProS Glut	Sox10_Chr15:78856948-78857447	1.00262	4e-05	0.0289575
016 CA1-ProS Glut	Sox10_Chr15:79097517-79098016	0.889209	4e-05	0.0289575
016 CA1-ProS Glut	Sox10_Chr15:79201729-79202228	0.941624	4e-05	0.0289575
016 CA1-ProS Glut	Sox10_Chr15:79212729-79213228	0.845058	8e-05	0.0496884
016 CA1-ProS Glut	Dnal4_Chr15:79466843-79467342	0.826984	0.00012	0.0638333
016 CA1-ProS Glut	Nptxr_Chr15:79823832-79824331	1.11105	4e-05	0.0289575
016 CA1-ProS Glut	Pnpla3_Chr15:84120552-84121051	0.743086	0.0002	0.0888736
016 CA1-ProS Glut	C730034F03Rik_Chr15:89464978-89465477	1.0816	4e-05	0.0289575
016 CA1-ProS Glut	Slc38a2_Chr15:96527649-96528148	0.415599	4e-05	0.0289575
016 CA1-ProS Glut	Arid2_Chr15:96665827-96666326	0.439451	4e-05	0.0289575
016 CA1-ProS Glut	Smarcd1_Chr15:99664394-99664893	0.674335	4e-05	0.0289575
016 CA1-ProS Glut	Litaf_Chr16:10992871-10993370	0.825533	4e-05	0.0289575
016 CA1-ProS Glut	Litaf_Chr16:11012412-11012911	0.823179	4e-05	0.0289575
016 CA1-ProS Glut	Litaf_Chr16:11021633-11022132	0.953965	4e-05	0.0289575
016 CA1-ProS Glut	Pdxdc1_Chr16:14004171-14004670	0.415882	0.00016	0.0780818
016 CA1-ProS Glut	Crkl_Chr16:17553801-17554300	0.683081	4e-05	0.0289575
016 CA1-ProS Glut	Klhl22_Chr16:17765798-17766297	0.513274	4e-05	0.0289575
016 CA1-ProS Glut	Apod_Chr16:30977149-30977648	0.588601	4e-05	0.0289575
016 CA1-ProS Glut	Apod_Chr16:31290172-31290671	0.560902	0.00024	0.0995654
016 CA1-ProS Glut	Apod_Chr16:31493898-31494397	0.633108	8e-05	0.0496884
016 CA1-ProS Glut	Pigz_Chr16:31493898-31494397	0.909561	4e-05	0.0289575
016 CA1-ProS Glut	Fbxo45_Chr16:32055948-32056447	0.719601	4e-05	0.0289575
016 CA1-ProS Glut	Igsf11_Chr16:38673376-38673875	1.11633	4e-05	0.0289575
016 CA1-ProS Glut	Igsf11_Chr16:38928742-38929241	1.03846	8e-05	0.0496884
016 CA1-ProS Glut	Igsf11_Chr16:38941163-38941662	1.10227	4e-05	0.0289575
016 CA1-ProS Glut	Naa60_Chr16:4138330-4138829	0.619208	0.00024	0.0995654
016 CA1-ProS Glut	Sidt1_Chr16:44320090-44320589	0.84298	0.0002	0.0888736
016 CA1-ProS Glut	Sec14l5_Chr16:4907408-4907907	0.623187	4e-05	0.0289575
016 CA1-ProS Glut	Sec14l5_Chr16:4912685-4913184	0.834702	4e-05	0.0289575
016 CA1-ProS Glut	Sec14l5_Chr16:5150532-5151031	1.03546	4e-05	0.0289575
016 CA1-ProS Glut	Olig1_Chr16:91304026-91304525	0.844015	4e-05	0.0289575
016 CA1-ProS Glut	Olig1_Chr16:91305527-91306026	0.604824	0.00024	0.0995654
016 CA1-ProS Glut	Qk_Chr17:10390616-10391115	0.519857	4e-05	0.0289575
016 CA1-ProS Glut	Gm16168_Chr17:10451327-10451826	0.664868	4e-05	0.0289575
016 CA1-ProS Glut	Qk_Chr17:10451327-10451826	0.691554	4e-05	0.0289575
016 CA1-ProS Glut	Gm16168_Chr17:10454324-10454823	1.03663	4e-05	0.0289575
016 CA1-ProS Glut	Pacrg_Chr17:10454324-10454823	0.626187	4e-05	0.0289575
016 CA1-ProS Glut	Qk_Chr17:10454324-10454823	0.798342	4e-05	0.0289575
016 CA1-ProS Glut	Gm16168_Chr17:10483827-10484326	0.785452	4e-05	0.0289575
016 CA1-ProS Glut	Pacrg_Chr17:10483827-10484326	0.517409	4e-05	0.0289575
016 CA1-ProS Glut	Qk_Chr17:10483827-10484326	0.7342	4e-05	0.0289575
016 CA1-ProS Glut	Gm16168_Chr17:10492990-10493489	0.743638	4e-05	0.0289575
016 CA1-ProS Glut	Qk_Chr17:10492990-10493489	0.820791	4e-05	0.0289575
016 CA1-ProS Glut	Gm16168_Chr17:10507376-10507875	0.842847	4e-05	0.0289575
016 CA1-ProS Glut	Qk_Chr17:10507376-10507875	0.668783	4e-05	0.0289575
016 CA1-ProS Glut	Qk_Chr17:10745088-10745587	0.48699	4e-05	0.0289575
016 CA1-ProS Glut	Agpat4_Chr17:12168393-12168892	0.580682	4e-05	0.0289575
016 CA1-ProS Glut	Fam120b_Chr17:15252137-15252636	0.3967	4e-05	0.0289575
016 CA1-ProS Glut	Wdr90_Chr17:25507709-25508208	0.754641	4e-05	0.0289575
016 CA1-ProS Glut	2810468N07Rik_Chr17:25925283-25925782	0.797048	4e-05	0.0289575
016 CA1-ProS Glut	Gng13_Chr17:25925283-25925782	0.685861	0.00012	0.0638333
016 CA1-ProS Glut	Gng13_Chr17:25978695-25979194	0.85323	4e-05	0.0289575
016 CA1-ProS Glut	Phf1_Chr17:27170203-27170702	0.75515	0.00024	0.0995654
016 CA1-ProS Glut	Ilrun_Chr17:28042181-28042680	0.431051	8e-05	0.0496884
016 CA1-ProS Glut	Igfbp5_Chr1:72967508-72968007	0.879464	4e-05	0.0289575
016 CA1-ProS Glut	Igfbp5_Chr1:73162096-73162595	0.953178	4e-05	0.0289575
016 CA1-ProS Glut	Rpl37a_Chr1:73169926-73170425	0.479478	8e-05	0.0496884
016 CA1-ProS Glut	Rxrb_Chr17:34262929-34263428	0.465588	0.0002	0.0888736
016 CA1-ProS Glut	Ddr1_Chr17:35578115-35578614	0.614769	4e-05	0.0289575
016 CA1-ProS Glut	Cnpy3_Chr17:46418396-46418895	0.706144	4e-05	0.0289575
016 CA1-ProS Glut	Dlk2_Chr17:46425137-46425636	1.11086	8e-05	0.0496884
016 CA1-ProS Glut	Polr1c_Chr17:46425137-46425636	0.763324	0.0002	0.0888736
016 CA1-ProS Glut	Mrpl2_Chr17:46696069-46696568	0.642745	8e-05	0.0496884
016 CA1-ProS Glut	Mea1_Chr17:47151709-47152208	0.681526	4e-05	0.0289575
016 CA1-ProS Glut	Cnppd1_Chr1:74829865-74830364	0.894057	4e-05	0.0289575
016 CA1-ProS Glut	Daam2_Chr17:49590064-49590563	0.97185	4e-05	0.0289575
016 CA1-ProS Glut	Tbc1d5_Chr17:50753754-50754253	0.361649	0.00012	0.0638333
016 CA1-ProS Glut	Tbc1d5_Chr17:51204518-51205017	0.540082	4e-05	0.0289575
016 CA1-ProS Glut	Tmem242_Chr17:5195331-5195830	0.759312	0.00016	0.0780818
016 CA1-ProS Glut	Tuba4a_Chr1:75467473-75467972	0.338124	0.00016	0.0780818
016 CA1-ProS Glut	Inha_Chr1:75495132-75495631	0.667541	4e-05	0.0289575
016 CA1-ProS Glut	Synj2_Chr17:6002481-6002980	0.296587	0.00024	0.0995654
016 CA1-ProS Glut	Tulp4_Chr17:6002481-6002980	0.428093	4e-05	0.0289575
016 CA1-ProS Glut	Rab31_Chr17:65746214-65746713	0.374691	0.00012	0.0638333
016 CA1-ProS Glut	Ralbp1_Chr17:66325046-66325545	0.57067	4e-05	0.0289575
016 CA1-ProS Glut	Dpy30_Chr17:74186257-74186756	0.593695	0.0002	0.0888736
016 CA1-ProS Glut	Gm26749_Chr17:74687769-74688268	0.436805	4e-05	0.0289575
016 CA1-ProS Glut	BC035947_Chr1:78998403-78998902	0.903962	0.00012	0.0638333
016 CA1-ProS Glut	Chst9_Chr18:15741287-15741786	0.855153	0.00012	0.0638333
016 CA1-ProS Glut	Bin1_Chr18:31946532-31947031	0.395507	4e-05	0.0289575
016 CA1-ProS Glut	Kctd16_Chr18:40178683-40179182	0.229138	0.00012	0.0638333
016 CA1-ProS Glut	Ccdc112_Chr18:46358104-46358603	-15.5974	4e-05	0.0289575
016 CA1-ProS Glut	Gramd3_Chr18:56467118-56467617	1.09323	0.00024	0.0995654
016 CA1-ProS Glut	March3_Chr18:56761954-56762453	0.51616	4e-05	0.0289575
016 CA1-ProS Glut	Rps14_Chr18:60605971-60606470	0.283795	0.00012	0.0638333
016 CA1-ProS Glut	Sec11c_Chr18:65519327-65519826	0.388803	0.00024	0.0995654
016 CA1-ProS Glut	Sec11c_Chr18:65648145-65648644	0.452662	4e-05	0.0289575
016 CA1-ProS Glut	Sec11c_Chr18:65722599-65723098	0.410565	8e-05	0.0496884
016 CA1-ProS Glut	Smad7_Chr18:75276410-75276909	0.543094	8e-05	0.0496884
016 CA1-ProS Glut	Mbp_Chr18:82529139-82529638	0.563667	4e-05	0.0289575
016 CA1-ProS Glut	Mbp_Chr18:82538042-82538541	0.499133	4e-05	0.0289575
016 CA1-ProS Glut	Mbp_Chr18:82554123-82554622	0.776263	4e-05	0.0289575
016 CA1-ProS Glut	Mbp_Chr18:82586121-82586620	0.493034	4e-05	0.0289575
016 CA1-ProS Glut	Mbp_Chr18:82733449-82733948	0.418077	4e-05	0.0289575
016 CA1-ProS Glut	Sh3bp4_Chr1:88705781-88706280	0.535823	0.00012	0.0638333
016 CA1-ProS Glut	Carnmt1_Chr19:18967254-18967753	0.548791	4e-05	0.0289575
016 CA1-ProS Glut	Abhd17b_Chr19:21610474-21610973	0.43842	4e-05	0.0289575
016 CA1-ProS Glut	Abhd17b_Chr19:21723682-21724181	0.442159	4e-05	0.0289575
016 CA1-ProS Glut	Cbwd1_Chr19:24634515-24635014	0.667726	0.00024	0.0995654
016 CA1-ProS Glut	Cdc37l1_Chr19:28994566-28995065	0.446536	4e-05	0.0289575
016 CA1-ProS Glut	Jak2_Chr19:29265423-29265922	0.562971	4e-05	0.0289575
016 CA1-ProS Glut	Fra10ac1_Chr19:38633781-38634280	0.50971	8e-05	0.0496884
016 CA1-ProS Glut	Carns1_Chr19:4019120-4019619	0.983408	4e-05	0.0289575
016 CA1-ProS Glut	Ankrd13d_Chr19:4027479-4027978	0.604228	4e-05	0.0289575
016 CA1-ProS Glut	Opalin_Chr19:41073867-41074366	0.733087	4e-05	0.0289575
016 CA1-ProS Glut	Opalin_Chr19:41081501-41082000	0.772513	4e-05	0.0289575
016 CA1-ProS Glut	Scd2_Chr19:44295665-44296164	0.408883	4e-05	0.0289575
016 CA1-ProS Glut	Neat1_Chr19:5516788-5517287	0.818535	4e-05	0.0289575
016 CA1-ProS Glut	Eif1ad_Chr19:5715971-5716470	0.651822	8e-05	0.0496884
016 CA1-ProS Glut	Ablim1_Chr19:57554752-57555251	0.25059	0.00016	0.0780818
016 CA1-ProS Glut	Syvn1_Chr19:5792997-5793496	0.630237	0.00024	0.0995654
016 CA1-ProS Glut	Neat1_Chr19:5846537-5847036	0.527392	4e-05	0.0289575
016 CA1-ProS Glut	Neat1_Chr19:5850051-5850550	0.495059	8e-05	0.0496884
016 CA1-ProS Glut	Neat1_Chr19:5856518-5857017	0.853622	4e-05	0.0289575
016 CA1-ProS Glut	Fibp_Chr19:5945069-5945568	0.705017	4e-05	0.0289575
016 CA1-ProS Glut	Neat1_Chr19:5945069-5945568	0.899716	4e-05	0.0289575
016 CA1-ProS Glut	Neat1_Chr19:5956609-5957108	0.520697	4e-05	0.0289575
016 CA1-ProS Glut	Otub1_Chr19:7064499-7064998	0.549668	0.00012	0.0638333
016 CA1-ProS Glut	Mta2_Chr19:8661770-8662269	0.88077	4e-05	0.0289575
016 CA1-ProS Glut	Nxf1_Chr19:9071474-9071973	0.722846	4e-05	0.0289575
016 CA1-ProS Glut	Fth1_Chr19:9940739-9941238	0.454099	4e-05	0.0289575
016 CA1-ProS Glut	Myrf_Chr19:9940739-9941238	1.09058	4e-05	0.0289575
016 CA1-ProS Glut	Fth1_Chr19:9978553-9979052	0.419491	4e-05	0.0289575
016 CA1-ProS Glut	Fth1_Chr19:9982383-9982882	0.256508	4e-05	0.0289575
016 CA1-ProS Glut	Prr5l_Chr2:101664960-101665459	0.578108	8e-05	0.0496884
016 CA1-ProS Glut	Prr5l_Chr2:102252280-102252779	1.01195	4e-05	0.0289575
016 CA1-ProS Glut	Cd59a_Chr2:103643523-103644022	1.15778	0.00012	0.0638333
016 CA1-ProS Glut	Abtb2_Chr2:103670097-103670596	0.752158	8e-05	0.0496884
016 CA1-ProS Glut	Ccdc32_Chr2:118544254-118544753	0.74206	8e-05	0.0496884
016 CA1-ProS Glut	Gatm_Chr2:122605752-122606251	0.619238	4e-05	0.0289575
016 CA1-ProS Glut	Mtln_Chr2:127326573-127327072	0.674014	0.00016	0.0780818
016 CA1-ProS Glut	Mal_Chr2:127508637-127509136	0.573054	8e-05	0.0496884
016 CA1-ProS Glut	Mal_Chr2:127608228-127608727	0.65252	4e-05	0.0289575
016 CA1-ProS Glut	Mal_Chr2:127627174-127627673	0.802454	4e-05	0.0289575
016 CA1-ProS Glut	Ptpra_Chr2:130597395-130597894	0.339862	0.0002	0.0888736
016 CA1-ProS Glut	Sox12_Chr2:152785892-152786391	0.669955	4e-05	0.0289575
016 CA1-ProS Glut	Dusp15_Chr2:152820214-152820713	0.615114	4e-05	0.0289575
016 CA1-ProS Glut	Kif3b_Chr2:152914393-152914892	0.473255	8e-05	0.0496884
016 CA1-ProS Glut	Dusp15_Chr2:153105317-153105816	0.661679	4e-05	0.0289575
016 CA1-ProS Glut	Dusp15_Chr2:153425960-153426459	0.631855	4e-05	0.0289575
016 CA1-ProS Glut	Raly_Chr2:154677024-154677523	0.570247	0.00024	0.0995654
016 CA1-ProS Glut	Mmp24_Chr2:155626941-155627440	0.52518	0.0002	0.0888736
016 CA1-ProS Glut	Rbm39_Chr2:156256984-156257483	0.188403	0.0002	0.0888736
016 CA1-ProS Glut	Aar2_Chr2:156705316-156705815	0.483064	0.00024	0.0995654
016 CA1-ProS Glut	Vstm2l_Chr2:157561151-157561650	0.707337	4e-05	0.0289575
016 CA1-ProS Glut	Nnat_Chr2:157899003-157899502	1.28668	4e-05	0.0289575
016 CA1-ProS Glut	Vstm2l_Chr2:157899003-157899502	0.81496	4e-05	0.0289575
016 CA1-ProS Glut	Ppp1r16b_Chr2:158740867-158741366	0.932682	4e-05	0.0289575
016 CA1-ProS Glut	Dbndd2_Chr2:164487770-164488269	0.493641	4e-05	0.0289575
016 CA1-ProS Glut	Dbndd2_Chr2:164515716-164516215	0.751793	4e-05	0.0289575
016 CA1-ProS Glut	Bcas1_Chr2:170406393-170406892	1.20241	4e-05	0.0289575
016 CA1-ProS Glut	Taf4_Chr2:180472986-180473485	0.705369	0.00024	0.0995654
016 CA1-ProS Glut	Stmn3_Chr2:181159187-181159686	0.174982	0.0002	0.0888736
016 CA1-ProS Glut	Kcnt1_Chr2:25400684-25401183	0.436995	8e-05	0.0496884
016 CA1-ProS Glut	Abca2_Chr2:25430759-25431258	0.368869	4e-05	0.0289575
016 CA1-ProS Glut	Cacfd1_Chr2:27096197-27096696	0.604937	0.0002	0.0888736
016 CA1-ProS Glut	Wdr5_Chr2:27983795-27984294	0.65981	0.00016	0.0780818
016 CA1-ProS Glut	Odf2_Chr2:29493548-29494047	0.413418	4e-05	0.0289575
016 CA1-ProS Glut	Coq4_Chr2:29944706-29945205	0.905005	0.0002	0.0888736
016 CA1-ProS Glut	Asb6_Chr2:30684969-30685468	0.901702	0.0002	0.0888736
016 CA1-ProS Glut	Fnbp1_Chr2:31088212-31088711	0.204375	4e-05	0.0289575
016 CA1-ProS Glut	Fam129b_Chr2:32437479-32437978	1.02896	0.00016	0.0780818
016 CA1-ProS Glut	Gm10862_Chr2:3769243-3769742	0.521672	0.00012	0.0638333
016 CA1-ProS Glut	Zeb2_Chr2:45068951-45069450	0.838491	4e-05	0.0289575
016 CA1-ProS Glut	Metap1d_Chr2:71580942-71581441	0.526781	8e-05	0.0496884
016 CA1-ProS Glut	Ube2e3_Chr2:78587518-78588017	0.370085	4e-05	0.0289575
016 CA1-ProS Glut	Gm13889_Chr2:94326531-94327030	1.11174	0.00016	0.0780818
016 CA1-ProS Glut	A230001M10Rik_Chr3:102708468-102708967	0.935775	0.00012	0.0638333
016 CA1-ProS Glut	Tspan2_Chr3:102708468-102708967	0.575773	4e-05	0.0289575
016 CA1-ProS Glut	Gstm5_Chr3:107788899-107789398	0.595534	4e-05	0.0289575
016 CA1-ProS Glut	Bmpr1b_Chr3:142109802-142110301	0.783321	4e-05	0.0289575
016 CA1-ProS Glut	Car2_Chr3:15112045-15112544	0.733019	4e-05	0.0289575
016 CA1-ProS Glut	Cldn11_Chr3:31166380-31166879	0.814889	4e-05	0.0289575
016 CA1-ProS Glut	Cldn11_Chr3:31213691-31214190	0.537989	4e-05	0.0289575
016 CA1-ProS Glut	Cldn11_Chr3:31229209-31229708	0.610262	0.00012	0.0638333
016 CA1-ProS Glut	Pex5l_Chr3:33070585-33071084	0.28013	4e-05	0.0289575
016 CA1-ProS Glut	Pex5l_Chr3:33089759-33090258	0.301449	4e-05	0.0289575
016 CA1-ProS Glut	Sox2ot_Chr3:34441135-34441634	0.726575	4e-05	0.0289575
016 CA1-ProS Glut	Spg20_Chr3:55300029-55300528	0.826864	0.00016	0.0780818
016 CA1-ProS Glut	Spg20_Chr3:55442068-55442567	1.04547	4e-05	0.0289575
016 CA1-ProS Glut	Rnf13_Chr3:57677679-57678178	0.517327	4e-05	0.0289575
016 CA1-ProS Glut	Serp1_Chr3:58817676-58818175	1.00005	4e-05	0.0289575
016 CA1-ProS Glut	Etfdh_Chr3:79181366-79181865	0.558129	4e-05	0.0289575
016 CA1-ProS Glut	Gucy1b1_Chr3:82364980-82365479	0.581525	0.0002	0.0888736
016 CA1-ProS Glut	Ubqln4_Chr3:88449657-88450156	0.597406	0.0002	0.0888736
016 CA1-ProS Glut	Smg5_Chr3:88483530-88484029	0.503783	0.00024	0.0995654
016 CA1-ProS Glut	Tpm3_Chr3:89571307-89571806	0.557487	4e-05	0.0289575
016 CA1-ProS Glut	Zbtb7b_Chr3:89655249-89655748	0.985819	0.00012	0.0638333
016 CA1-ProS Glut	Dpm3_Chr3:89726970-89727469	0.696706	4e-05	0.0289575
016 CA1-ProS Glut	Jtb_Chr3:89785339-89785838	0.608085	4e-05	0.0289575
016 CA1-ProS Glut	S100a16_Chr3:90540935-90541434	0.680263	0.00012	0.0638333
016 CA1-ProS Glut	Gm31305_Chr3:97734105-97734604	-16.592	4e-05	0.0289575
016 CA1-ProS Glut	Pde4b_Chr4:102483266-102483765	0.436234	0.00012	0.0638333
016 CA1-ProS Glut	Lrrc42_Chr4:106854392-106854891	0.721615	4e-05	0.0289575
016 CA1-ProS Glut	Dmap1_Chr4:117323423-117323922	0.921436	0.00012	0.0638333
016 CA1-ProS Glut	B4galt2_Chr4:118089903-118090402	0.921317	0.00012	0.0638333
016 CA1-ProS Glut	Epha10_Chr4:124908054-124908553	0.518623	0.00016	0.0780818
016 CA1-ProS Glut	Dlgap3_Chr4:127489242-127489741	0.428317	8e-05	0.0496884
016 CA1-ProS Glut	Csmd2_Chr4:128218015-128218514	0.681069	0.00016	0.0780818
016 CA1-ProS Glut	Snrnp40_Chr4:130790106-130790605	0.574308	4e-05	0.0289575
016 CA1-ProS Glut	Ppp1r8_Chr4:133038339-133038838	0.780013	4e-05	0.0289575
016 CA1-ProS Glut	Arid1a_Chr4:133423007-133423506	0.392528	0.0002	0.0888736
016 CA1-ProS Glut	Clic4_Chr4:135298027-135298526	1.14257	4e-05	0.0289575
016 CA1-ProS Glut	Pnrc2_Chr4:135981613-135982112	0.795189	0.00012	0.0638333
016 CA1-ProS Glut	Camk2n1_Chr4:138727185-138727684	0.506367	0.00012	0.0638333
016 CA1-ProS Glut	Crocc_Chr4:140964511-140965010	0.914679	8e-05	0.0496884
016 CA1-ProS Glut	Slc25a33_Chr4:150117194-150117693	0.520932	0.0002	0.0888736
016 CA1-ProS Glut	Prxl2b_Chr4:155196172-155196671	0.760548	0.00012	0.0638333
016 CA1-ProS Glut	Tmem245_Chr4:56706356-56706855	0.422377	0.00016	0.0780818
016 CA1-ProS Glut	Whrn_Chr4:63409964-63410463	0.830409	0.00024	0.0995654
016 CA1-ProS Glut	Golga3_Chr5:110057852-110058351	0.604961	0.00012	0.0638333
016 CA1-ProS Glut	Golga3_Chr5:110363025-110363524	0.521372	0.00016	0.0780818
016 CA1-ProS Glut	Hscb_Chr5:111262795-111263294	0.970813	0.00024	0.0995654
016 CA1-ProS Glut	Gltp_Chr5:114489507-114490006	0.963766	0.00012	0.0638333
016 CA1-ProS Glut	Ppp1cc_Chr5:122091014-122091513	0.457806	4e-05	0.0289575
016 CA1-ProS Glut	Rnf34_Chr5:122900163-122900662	0.463741	0.0002	0.0888736
016 CA1-ProS Glut	Ubc_Chr5:125081654-125082153	0.257443	0.00012	0.0638333
016 CA1-ProS Glut	4930563F08Rik_Chr5:131821220-131821719	0.941376	0.00024	0.0995654
016 CA1-ProS Glut	Castor2_Chr5:134350625-134351124	0.607229	0.0002	0.0888736
016 CA1-ProS Glut	Nsun5_Chr5:135028933-135029432	-16.6776	4e-05	0.0289575
016 CA1-ProS Glut	Rhbdd2_Chr5:135286137-135286636	0.708051	8e-05	0.0496884
016 CA1-ProS Glut	Gjc3_Chr5:137757811-137758310	0.695968	4e-05	0.0289575
016 CA1-ProS Glut	Tsc22d4_Chr5:137757811-137758310	0.671721	4e-05	0.0289575
016 CA1-ProS Glut	Gjc3_Chr5:137759868-137760367	0.924999	4e-05	0.0289575
016 CA1-ProS Glut	Gjc3_Chr5:137966359-137966858	0.860577	4e-05	0.0289575
016 CA1-ProS Glut	Actb_Chr5:142961827-142962326	0.225864	4e-05	0.0289575
016 CA1-ProS Glut	Cyth3_Chr5:143253560-143254059	0.571604	4e-05	0.0289575
016 CA1-ProS Glut	Galnt11_Chr5:25086090-25086589	0.278428	0.00012	0.0638333
016 CA1-ProS Glut	Depdc5_Chr5:33039341-33039840	0.352559	4e-05	0.0289575
016 CA1-ProS Glut	Sorcs2_Chr5:36113006-36113505	0.334484	4e-05	0.0289575
016 CA1-ProS Glut	Qdpr_Chr5:45473034-45473533	0.519153	4e-05	0.0289575
016 CA1-ProS Glut	Lap3_Chr5:45534272-45534771	0.784629	4e-05	0.0289575
016 CA1-ProS Glut	Dancr_Chr5:74205394-74205893	0.65493	0.00012	0.0638333
016 CA1-ProS Glut	Hopx_Chr5:77293503-77294002	0.963668	4e-05	0.0289575
016 CA1-ProS Glut	Ccng2_Chr5:93036608-93037107	0.941929	0.0002	0.0888736
016 CA1-ProS Glut	Grm3_Chr5:9427520-9428019	0.591537	4e-05	0.0289575
016 CA1-ProS Glut	Gm16226_Chr5:99394479-99394978	0.850379	0.0002	0.0888736
016 CA1-ProS Glut	0610040F04Rik_Chr6:108355811-108356310	0.795127	0.00016	0.0780818
016 CA1-ProS Glut	Camk1_Chr6:113370578-113371077	0.558858	4e-05	0.0289575
016 CA1-ProS Glut	Vgll4_Chr6:114883134-114883633	0.950472	4e-05	0.0289575
016 CA1-ProS Glut	Cacna1c_Chr6:119108860-119109359	-0.106078	0.00024	0.0995654
016 CA1-ProS Glut	Adipor2_Chr6:119418690-119419189	0.389922	0.0002	0.0888736
016 CA1-ProS Glut	Rimklb_Chr6:122258782-122259281	0.810024	4e-05	0.0289575
016 CA1-ProS Glut	Cd9_Chr6:125157067-125157566	0.657384	4e-05	0.0289575
016 CA1-ProS Glut	Cd9_Chr6:125467135-125467634	0.687317	4e-05	0.0289575
016 CA1-ProS Glut	Kcna6_Chr6:126761335-126761834	0.66375	4e-05	0.0289575
016 CA1-ProS Glut	Adck2_Chr6:39462811-39463310	0.907128	4e-05	0.0289575
016 CA1-ProS Glut	Zfp467_Chr6:47978827-47979326	0.820984	0.0002	0.0888736
016 CA1-ProS Glut	Zfp467_Chr6:48022608-48023107	0.867669	4e-05	0.0289575
016 CA1-ProS Glut	Pdia4_Chr6:48177855-48178354	0.872439	4e-05	0.0289575
016 CA1-ProS Glut	9130019P16Rik_Chr6:54273243-54273742	1.14967	4e-05	0.0289575
016 CA1-ProS Glut	Scrn1_Chr6:54647310-54647809	0.450524	4e-05	0.0289575
016 CA1-ProS Glut	Slc25a13_Chr6:6191832-6192331	1.15719	4e-05	0.0289575
016 CA1-ProS Glut	Mat2a_Chr6:72601655-72602154	0.322763	0.0002	0.0888736
016 CA1-ProS Glut	Rab11fip5_Chr6:85346150-85346649	0.544614	0.00012	0.0638333
016 CA1-ProS Glut	Cnbp_Chr6:87513285-87513784	0.423322	0.00024	0.0995654
016 CA1-ProS Glut	9530026P05Rik_Chr6:92440116-92440615	0.820641	0.00024	0.0995654
016 CA1-ProS Glut	Frmd4b_Chr6:97487742-97488241	0.46385	4e-05	0.0289575
016 CA1-ProS Glut	Arhgef17_Chr7:100816088-100816587	0.51797	0.00012	0.0638333
016 CA1-ProS Glut	Rhog_Chr7:102238784-102239283	0.763735	4e-05	0.0289575
016 CA1-ProS Glut	Olfml1_Chr7:107665848-107666347	1.31146	4e-05	0.0289575
016 CA1-ProS Glut	Tmem9b_Chr7:109798686-109799185	0.446587	4e-05	0.0289575
016 CA1-ProS Glut	Iqck_Chr7:118359290-118359789	1.07014	4e-05	0.0289575
016 CA1-ProS Glut	Gprc5b_Chr7:118983845-118984344	0.633653	4e-05	0.0289575
016 CA1-ProS Glut	Dcun1d3_Chr7:120036299-120036798	0.851729	0.00012	0.0638333
016 CA1-ProS Glut	Arhgap17_Chr7:123069229-123069728	0.43149	4e-05	0.0289575
016 CA1-ProS Glut	Hs3st4_Chr7:123487745-123488244	1.33613	4e-05	0.0289575
016 CA1-ProS Glut	Bola2_Chr7:126643150-126643649	0.804623	4e-05	0.0289575
016 CA1-ProS Glut	Cdipt_Chr7:126704008-126704507	0.54204	8e-05	0.0496884
016 CA1-ProS Glut	Tmem219_Chr7:127104422-127104921	0.718922	4e-05	0.0289575
016 CA1-ProS Glut	Zfp668_Chr7:128016045-128016544	0.717421	0.00012	0.0638333
016 CA1-ProS Glut	Fgfr2_Chr7:132996353-132996852	0.259129	0.00012	0.0638333
016 CA1-ProS Glut	D7Ertd443e_Chr7:134491274-134491773	0.751798	4e-05	0.0289575
016 CA1-ProS Glut	Ppp2r2d_Chr7:138957019-138957518	0.437277	0.0002	0.0888736
016 CA1-ProS Glut	Stk32c_Chr7:139234862-139235361	0.45536	4e-05	0.0289575
016 CA1-ProS Glut	Stk32c_Chr7:139445536-139446035	0.426342	4e-05	0.0289575
016 CA1-ProS Glut	Chid1_Chr7:141363311-141363810	0.550628	4e-05	0.0289575
016 CA1-ProS Glut	Taldo1_Chr7:141589019-141589518	0.498892	4e-05	0.0289575
016 CA1-ProS Glut	Deaf1_Chr7:141778605-141779104	0.598048	4e-05	0.0289575
016 CA1-ProS Glut	Mrpl23_Chr7:143015916-143016415	0.546827	4e-05	0.0289575
016 CA1-ProS Glut	Ercc1_Chr7:19388637-19389136	0.832966	4e-05	0.0289575
016 CA1-ProS Glut	Gpr4_Chr7:19388637-19389136	1.10553	4e-05	0.0289575
016 CA1-ProS Glut	Clasrp_Chr7:19600383-19600882	0.567267	8e-05	0.0496884
016 CA1-ProS Glut	Clasrp_Chr7:19933401-19933900	0.532135	4e-05	0.0289575
016 CA1-ProS Glut	Cic_Chr7:24971200-24971699	0.750504	0.00016	0.0780818
016 CA1-ProS Glut	Rab4b_Chr7:27335804-27336303	0.428891	0.00016	0.0780818
016 CA1-ProS Glut	Ppp1r14a_Chr7:28924035-28924534	0.544095	0.00016	0.0780818
016 CA1-ProS Glut	Ppp1r14a_Chr7:28930627-28931126	0.718294	0.00016	0.0780818
016 CA1-ProS Glut	Ppp1r14a_Chr7:29291020-29291519	0.650145	8e-05	0.0496884
016 CA1-ProS Glut	Ppp1r14a_Chr7:29767000-29767499	0.532687	8e-05	0.0496884
016 CA1-ProS Glut	Aplp1_Chr7:30294999-30295498	0.354506	0.00012	0.0638333
016 CA1-ProS Glut	Mag_Chr7:31082899-31083398	0.795602	4e-05	0.0289575
016 CA1-ProS Glut	Zfp536_Chr7:38084742-38085241	0.451152	0.00012	0.0638333
016 CA1-ProS Glut	Zfp536_Chr7:38217225-38217724	0.846258	4e-05	0.0289575
016 CA1-ProS Glut	Leng9_Chr7:4131093-4131592	0.589649	4e-05	0.0289575
016 CA1-ProS Glut	Pih1d1_Chr7:44724211-44724710	1.09362	4e-05	0.0289575
016 CA1-ProS Glut	Rps11_Chr7:44745059-44745558	0.275858	0.0002	0.0888736
016 CA1-ProS Glut	Bax_Chr7:45555707-45556206	0.717105	8e-05	0.0496884
016 CA1-ProS Glut	Ldha_Chr7:47132345-47132844	0.819977	0.00012	0.0638333
016 CA1-ProS Glut	Htatip2_Chr7:49364405-49364904	0.838599	0.00024	0.0995654
016 CA1-ProS Glut	Mtmr10_Chr7:63951103-63951602	0.783095	0.00016	0.0780818
016 CA1-ProS Glut	Mtmr10_Chr7:63965039-63965538	0.941765	4e-05	0.0289575
016 CA1-ProS Glut	Mcee_Chr7:64741883-64742382	1.06771	4e-05	0.0289575
016 CA1-ProS Glut	Ntrk3_Chr7:79140748-79141247	0.727536	0.00012	0.0638333
016 CA1-ProS Glut	Vps33b_Chr7:80386458-80386957	0.647994	0.0002	0.0888736
016 CA1-ProS Glut	Pde8a_Chr7:81304586-81305085	0.895237	4e-05	0.0289575
016 CA1-ProS Glut	Pde8a_Chr7:81307676-81308175	0.808068	4e-05	0.0289575
016 CA1-ProS Glut	Pde8a_Chr7:81321002-81321501	0.751214	8e-05	0.0496884
016 CA1-ProS Glut	Rab30_Chr7:92546662-92547161	0.326649	0.00024	0.0995654
016 CA1-ProS Glut	Acd_Chr8:105515866-105516365	0.821775	8e-05	0.0496884
016 CA1-ProS Glut	Fa2h_Chr8:111353403-111353902	0.907813	4e-05	0.0289575
016 CA1-ProS Glut	Fa2h_Chr8:111375065-111375564	0.713286	4e-05	0.0289575
016 CA1-ProS Glut	Cotl1_Chr8:119946348-119946847	0.755049	0.00016	0.0780818
016 CA1-ProS Glut	Zdhhc7_Chr8:120288221-120288720	0.891703	0.00012	0.0638333
016 CA1-ProS Glut	Cox4i1_Chr8:120570230-120570729	0.268801	4e-05	0.0289575
016 CA1-ProS Glut	Ctu2_Chr8:122161108-122161607	1.06952	4e-05	0.0289575
016 CA1-ProS Glut	Aprt_Chr8:122678061-122678560	0.763779	4e-05	0.0289575
016 CA1-ProS Glut	Sprtn_Chr8:125236281-125236780	0.677382	0.0002	0.0888736
016 CA1-ProS Glut	Arhgef10_Chr8:14906758-14907257	0.897391	4e-05	0.0289575
016 CA1-ProS Glut	Arhgef10_Chr8:15036635-15037134	0.787833	8e-05	0.0496884
016 CA1-ProS Glut	Fat1_Chr8:44606950-44607449	0.623644	4e-05	0.0289575
016 CA1-ProS Glut	Ing2_Chr8:47182145-47182644	-15.9421	4e-05	0.0289575
016 CA1-ProS Glut	Cdkn2aip_Chr8:47413617-47414116	0.6842	0.00024	0.0995654
016 CA1-ProS Glut	Klhl2_Chr8:64754457-64754956	0.576551	4e-05	0.0289575
016 CA1-ProS Glut	Klhl2_Chr8:64843055-64843554	0.555408	4e-05	0.0289575
016 CA1-ProS Glut	Borcs8_Chr8:70330670-70331169	0.65151	4e-05	0.0289575
016 CA1-ProS Glut	Sugp2_Chr8:70331979-70332478	0.379756	0.0002	0.0888736
016 CA1-ProS Glut	Mast3_Chr8:70792225-70792724	0.549079	4e-05	0.0289575
016 CA1-ProS Glut	Rex1bd_Chr8:70796828-70797327	0.446434	0.0002	0.0888736
016 CA1-ProS Glut	Fkbp8_Chr8:70833486-70833985	0.441322	0.00024	0.0995654
016 CA1-ProS Glut	Mast3_Chr8:70833486-70833985	0.560708	0.0002	0.0888736
016 CA1-ProS Glut	Rasd2_Chr8:75083659-75084158	0.906914	0.00016	0.0780818
016 CA1-ProS Glut	Gab1_Chr8:80753250-80753749	0.631807	0.00012	0.0638333
016 CA1-ProS Glut	Nfix_Chr8:84765636-84766135	0.881069	4e-05	0.0289575
016 CA1-ProS Glut	Wdr83_Chr8:84997814-84998313	0.648463	0.00016	0.0780818
016 CA1-ProS Glut	Nudt21_Chr8:94266266-94266765	0.530368	0.00016	0.0780818
016 CA1-ProS Glut	Mt2_Chr8:94363260-94363759	0.781758	0.00016	0.0780818
016 CA1-ProS Glut	Pllp_Chr8:94678527-94679026	0.652057	4e-05	0.0289575
016 CA1-ProS Glut	Pllp_Chr8:94684200-94684699	0.800518	4e-05	0.0289575
016 CA1-ProS Glut	Kifc3_Chr8:94811684-94812183	0.598983	4e-05	0.0289575
016 CA1-ProS Glut	Pllp_Chr8:94986660-94987159	0.881778	4e-05	0.0289575
016 CA1-ProS Glut	Pllp_Chr8:95143057-95143556	0.653876	4e-05	0.0289575
016 CA1-ProS Glut	Polr2c_Chr8:95302373-95302872	0.661122	4e-05	0.0289575
016 CA1-ProS Glut	Trf_Chr9:103207699-103208198	0.459503	4e-05	0.0289575
016 CA1-ProS Glut	Trf_Chr9:103234445-103234944	0.69488	4e-05	0.0289575
016 CA1-ProS Glut	Trf_Chr9:103563814-103564313	0.558421	4e-05	0.0289575
016 CA1-ProS Glut	Trf_Chr9:103624581-103625080	0.647278	4e-05	0.0289575
016 CA1-ProS Glut	Twf2_Chr9:106454806-106455305	0.853298	4e-05	0.0289575
016 CA1-ProS Glut	Ptpn23_Chr9:110726791-110727290	0.612613	0.0002	0.0888736
016 CA1-ProS Glut	Mobp_Chr9:120010877-120011376	0.362596	0.0002	0.0888736
016 CA1-ProS Glut	Mobp_Chr9:120144392-120144891	0.910195	4e-05	0.0289575
016 CA1-ProS Glut	Endod1_Chr9:14380230-14380729	0.584564	0.00012	0.0638333
016 CA1-ProS Glut	S1pr5_Chr9:21244439-21244938	0.879815	0.00024	0.0995654
016 CA1-ProS Glut	Anln_Chr9:22024468-22024967	0.814553	4e-05	0.0289575
016 CA1-ProS Glut	Tmem205_Chr9:22041893-22042392	0.85238	4e-05	0.0289575
016 CA1-ProS Glut	Herpud2_Chr9:25160205-25160704	0.492389	4e-05	0.0289575
016 CA1-ProS Glut	Sept7_Chr9:25240971-25241470	0.393504	4e-05	0.0289575
016 CA1-ProS Glut	Ubash3b_Chr9:41207358-41207857	0.667115	0.00012	0.0638333
016 CA1-ProS Glut	Ubash3b_Chr9:41464217-41464716	0.842284	8e-05	0.0496884
016 CA1-ProS Glut	Phldb1_Chr9:44717809-44718308	0.882662	4e-05	0.0289575
016 CA1-ProS Glut	Dscaml1_Chr9:45487069-45487568	0.707513	4e-05	0.0289575
016 CA1-ProS Glut	Pcsk7_Chr9:46314389-46314888	0.409186	0.00016	0.0780818
016 CA1-ProS Glut	Rexo2_Chr9:48728041-48728540	0.51078	0.00024	0.0995654
016 CA1-ProS Glut	Cryab_Chr9:50734916-50735415	0.473415	0.00024	0.0995654
016 CA1-ProS Glut	Pml_Chr9:58382247-58382746	0.854121	0.00016	0.0780818
016 CA1-ProS Glut	Larp6_Chr9:60699734-60700233	0.640826	4e-05	0.0289575
016 CA1-ProS Glut	Anp32a_Chr9:62468941-62469440	0.513414	8e-05	0.0496884
016 CA1-ProS Glut	Ubap1l_Chr9:65201332-65201831	0.743335	4e-05	0.0289575
016 CA1-ProS Glut	Cox7a2_Chr9:79937546-79938045	0.411054	4e-05	0.0289575
016 CA1-ProS Glut	Ube2cbp_Chr9:86451600-86452099	0.972974	4e-05	0.0289575
016 CA1-ProS Glut	Zic1_Chr9:90914324-90914823	0.282572	8e-05	0.0496884
016 CA1-ProS Glut	Zic1_Chr9:91381302-91381801	0.26036	4e-05	0.0289575
016 CA1-ProS Glut	4921534H16Rik_Chr9:97960186-97960685	0.753632	8e-05	0.0496884
016 CA1-ProS Glut	Gpm6b_ChrX:166173691-166174190	0.591211	4e-05	0.0289575
016 CA1-ProS Glut	Utp14a_ChrX:48284467-48284966	0.689171	0.00012	0.0638333
016 CA1-ProS Glut	Zfp280c_ChrX:48284467-48284966	0.377343	4e-05	0.0289575
016 CA1-ProS Glut	Zdhhc9_ChrX:48285145-48285644	0.611598	0.00024	0.0995654
093 RT-ZI Gnb3 Gaba	4930567K20Rik_Chr10:10792541-10793040	-17.5447	4e-05	0.00106736
093 RT-ZI Gnb3 Gaba	Fbxo30_Chr10:10792541-10793040	-16.2778	4e-05	0.00106736
093 RT-ZI Gnb3 Gaba	Gm5136_Chr10:108588249-108588748	-17.4483	4e-05	0.00106736
093 RT-ZI Gnb3 Gaba	Gm5136_Chr10:108679585-108680084	-17.9234	8e-05	0.00205831
093 RT-ZI Gnb3 Gaba	Gm5136_Chr10:108753195-108753694	-16.4115	4e-05	0.00106736
093 RT-ZI Gnb3 Gaba	Krr1_Chr10:111699501-111700000	-16.1605	4e-05	0.00106736
093 RT-ZI Gnb3 Gaba	Lgr5_Chr10:115349007-115349506	-17.9137	4e-05	0.00106736
093 RT-ZI Gnb3 Gaba	Rab3ip_Chr10:117025710-117026209	-16.9417	4e-05	0.00106736
093 RT-ZI Gnb3 Gaba	Yeats4_Chr10:117149679-117150178	-16.4628	4e-05	0.00106736
093 RT-ZI Gnb3 Gaba	Rab3ip_Chr10:117209515-117210014	-16.8361	4e-05	0.00106736
093 RT-ZI Gnb3 Gaba	Nup107_Chr10:117425806-117426305	-18.3145	4e-05	0.00106736
093 RT-ZI Gnb3 Gaba	Rap1b_Chr10:117425806-117426305	-17.4802	4e-05	0.00106736
093 RT-ZI Gnb3 Gaba	Yeats4_Chr10:117435311-117435810	-16.3112	4e-05	0.00106736
093 RT-ZI Gnb3 Gaba	Cpm_Chr10:117675546-117676045	-16.472	8e-05	0.00205831
093 RT-ZI Gnb3 Gaba	Cpm_Chr10:117676211-117676710	-16.6076	0.00016	0.0040227
093 RT-ZI Gnb3 Gaba	Slc35e3_Chr10:117676211-117676710	-16.8105	4e-05	0.00106736
093 RT-ZI Gnb3 Gaba	Slc35e3_Chr10:118103090-118103589	-16.7127	4e-05	0.00106736
093 RT-ZI Gnb3 Gaba	Grip1os2_Chr10:119692212-119692711	-17.6193	4e-05	0.00106736
093 RT-ZI Gnb3 Gaba	Ppm1h_Chr10:122883786-122884285	0.622343	4e-05	0.00106736
093 RT-ZI Gnb3 Gaba	Plagl1_Chr10:12614833-12615332	-18.2239	4e-05	0.00106736
093 RT-ZI Gnb3 Gaba	Mettl1_Chr10:126580435-126580934	-17.4158	4e-05	0.00106736
093 RT-ZI Gnb3 Gaba	Pip4k2c_Chr10:126809472-126809971	-17.5808	8e-05	0.00205831
093 RT-ZI Gnb3 Gaba	Atp23_Chr10:126845385-126845884	-17.1542	4e-05	0.00106736
093 RT-ZI Gnb3 Gaba	Pip4k2c_Chr10:126845385-126845884	-17.1486	4e-05	0.00106736
093 RT-ZI Gnb3 Gaba	Tsfm_Chr10:126845385-126845884	-16.311	4e-05	0.00106736
093 RT-ZI Gnb3 Gaba	Agap2_Chr10:126861865-126862364	-17.0451	4e-05	0.00106736
093 RT-ZI Gnb3 Gaba	Atp23_Chr10:126861865-126862364	-17.742	4e-05	0.00106736
093 RT-ZI Gnb3 Gaba	B4galnt1_Chr10:126861865-126862364	-15.8743	4e-05	0.00106736
093 RT-ZI Gnb3 Gaba	Mettl1_Chr10:126861865-126862364	-17.841	4e-05	0.00106736
093 RT-ZI Gnb3 Gaba	Tsfm_Chr10:126861865-126862364	-16.4585	4e-05	0.00106736
093 RT-ZI Gnb3 Gaba	Tsfm_Chr10:126869333-126869832	1.71954	0.00104	0.0250837
093 RT-ZI Gnb3 Gaba	Atp23_Chr10:126935708-126936207	-18.0215	4e-05	0.00106736
093 RT-ZI Gnb3 Gaba	Pip4k2c_Chr10:126935708-126936207	-17.0851	4e-05	0.00106736
093 RT-ZI Gnb3 Gaba	Atp23_Chr10:127338749-127339248	-17.8338	4e-05	0.00106736
093 RT-ZI Gnb3 Gaba	B4galnt1_Chr10:127338749-127339248	-16.1666	4e-05	0.00106736
093 RT-ZI Gnb3 Gaba	Tsfm_Chr10:127420597-127421096	-16.3152	4e-05	0.00106736
093 RT-ZI Gnb3 Gaba	Ddit3_Chr10:127511475-127511974	1.50963	0.004	0.0905916
093 RT-ZI Gnb3 Gaba	Agap2_Chr10:127537747-127538246	-16.2027	4e-05	0.00106736
093 RT-ZI Gnb3 Gaba	Pip4k2c_Chr10:127661996-127662495	-17.5075	4e-05	0.00106736
093 RT-ZI Gnb3 Gaba	Pan2_Chr10:128133556-128134055	-16.5495	4e-05	0.00106736
093 RT-ZI Gnb3 Gaba	Rnf41_Chr10:128185925-128186424	-16.2293	4e-05	0.00106736
093 RT-ZI Gnb3 Gaba	Pa2g4_Chr10:128440367-128440866	1.07234	0.00224	0.0525998
093 RT-ZI Gnb3 Gaba	Gls2_Chr10:128536151-128536650	0.933941	0.00232	0.0544027
093 RT-ZI Gnb3 Gaba	Ormdl2_Chr10:128536151-128536650	-18.4687	4e-05	0.00106736
093 RT-ZI Gnb3 Gaba	Dgka_Chr10:128586446-128586945	-16.8239	4e-05	0.00106736
093 RT-ZI Gnb3 Gaba	Dnajc14_Chr10:128586446-128586945	-15.8048	4e-05	0.00106736
093 RT-ZI Gnb3 Gaba	Rab5b_Chr10:128586446-128586945	-15.931	4e-05	0.00106736
093 RT-ZI Gnb3 Gaba	Cd63_Chr10:128909548-128910047	1.24875	0.00104	0.0250837
093 RT-ZI Gnb3 Gaba	Vmn2r86_Chr10:130470173-130470672	-17.1844	4e-05	0.00106736
093 RT-ZI Gnb3 Gaba	Plagl1_Chr10:13388456-13388955	-17.834	4e-05	0.00106736
093 RT-ZI Gnb3 Gaba	Heca_Chr10:18430851-18431350	-17.2874	4e-05	0.00106736
093 RT-ZI Gnb3 Gaba	Arfgef3_Chr10:18562870-18563369	0.560537	0.00272	0.0631543
093 RT-ZI Gnb3 Gaba	Bclaf1_Chr10:20089027-20089526	0.675814	0.00272	0.0631543
093 RT-ZI Gnb3 Gaba	Map7_Chr10:20226630-20227129	0.688827	0.00128	0.0306101
093 RT-ZI Gnb3 Gaba	4930455C13Rik_Chr10:21636575-21637074	-18.0739	4e-05	0.00106736
093 RT-ZI Gnb3 Gaba	Gm20300_Chr10:30537929-30538428	-16.7807	4e-05	0.00106736
093 RT-ZI Gnb3 Gaba	A830082N09Rik_Chr10:34033819-34034318	-16.7613	4e-05	0.00106736
093 RT-ZI Gnb3 Gaba	Dse_Chr10:34070952-34071451	-17.3704	4e-05	0.00106736
093 RT-ZI Gnb3 Gaba	A830082N09Rik_Chr10:34328180-34328679	-17.0256	4e-05	0.00106736
093 RT-ZI Gnb3 Gaba	Plekhg1_Chr10:3531348-3531847	-16.3693	4e-05	0.00106736
093 RT-ZI Gnb3 Gaba	Fyn_Chr10:39520238-39520737	0.655373	0.00096	0.0232316
093 RT-ZI Gnb3 Gaba	Amd1_Chr10:39926576-39927075	-17.2643	4e-05	0.00106736
093 RT-ZI Gnb3 Gaba	Slc16a10_Chr10:39926576-39927075	-17.1798	4e-05	0.00106736
093 RT-ZI Gnb3 Gaba	Gm16153_Chr10:3996391-3996890	-17.6142	4e-05	0.00106736
093 RT-ZI Gnb3 Gaba	Zbtb2_Chr10:3996391-3996890	-16.6901	4e-05	0.00106736
093 RT-ZI Gnb3 Gaba	Cdk19_Chr10:40516358-40516857	1.43583	4e-05	0.00106736
093 RT-ZI Gnb3 Gaba	Zbtb24_Chr10:40985278-40985777	-17.0232	4e-05	0.00106736
093 RT-ZI Gnb3 Gaba	Zbtb24_Chr10:41288663-41289162	-18.5055	4e-05	0.00106736
093 RT-ZI Gnb3 Gaba	Zbtb24_Chr10:41934485-41934984	-17.8402	4e-05	0.00106736
093 RT-ZI Gnb3 Gaba	Armc2_Chr10:42308053-42308552	-16.5802	4e-05	0.00106736
093 RT-ZI Gnb3 Gaba	Gm16153_Chr10:4334210-4334709	-17.8074	8e-05	0.00205831
093 RT-ZI Gnb3 Gaba	Zbtb2_Chr10:4341363-4341862	-16.5697	4e-05	0.00106736
093 RT-ZI Gnb3 Gaba	Rtn4ip1_Chr10:43527226-43527725	-18.149	4e-05	0.00106736
093 RT-ZI Gnb3 Gaba	Esr1_Chr10:4371862-4372361	-16.564	4e-05	0.00106736
093 RT-ZI Gnb3 Gaba	Gm16153_Chr10:4674897-4675396	-17.5479	8e-05	0.00205831
093 RT-ZI Gnb3 Gaba	Mcm9_Chr10:53528314-53528813	-17.9671	4e-05	0.00106736
093 RT-ZI Gnb3 Gaba	Ccdc138_Chr10:58371223-58371722	-17.1766	4e-05	0.00106736
093 RT-ZI Gnb3 Gaba	Mtrf1l_Chr10:5866469-5866968	-17.3451	4e-05	0.00106736
093 RT-ZI Gnb3 Gaba	Anapc16_Chr10:59503864-59504363	-18.0739	4e-05	0.00106736
093 RT-ZI Gnb3 Gaba	Anapc16_Chr10:60115305-60115804	-17.5036	4e-05	0.00106736
093 RT-ZI Gnb3 Gaba	Pald1_Chr10:61018721-61019220	-17.4895	4e-05	0.00106736
093 RT-ZI Gnb3 Gaba	Pcbd1_Chr10:61343893-61344392	1.29496	0.004	0.0905916
093 RT-ZI Gnb3 Gaba	Pald1_Chr10:61625518-61626017	-17.7524	4e-05	0.00106736
093 RT-ZI Gnb3 Gaba	Eif4ebp2_Chr10:61662423-61662922	-16.9622	4e-05	0.00106736
093 RT-ZI Gnb3 Gaba	Npffr1_Chr10:61662423-61662922	-17.0753	4e-05	0.00106736
093 RT-ZI Gnb3 Gaba	Tspan15_Chr10:61736458-61736957	-17.3924	4e-05	0.00106736
093 RT-ZI Gnb3 Gaba	Tspan15_Chr10:61838718-61839217	-17.7994	0.00024	0.00598212
093 RT-ZI Gnb3 Gaba	Npffr1_Chr10:61877724-61878223	-16.9019	4e-05	0.00106736
093 RT-ZI Gnb3 Gaba	Tspan15_Chr10:61877724-61878223	-17.1075	4e-05	0.00106736
093 RT-ZI Gnb3 Gaba	Fam241b_Chr10:62055337-62055836	-15.6667	4e-05	0.00106736
093 RT-ZI Gnb3 Gaba	Tspan15_Chr10:62055337-62055836	-17.6941	4e-05	0.00106736
093 RT-ZI Gnb3 Gaba	Tspan15_Chr10:62182956-62183455	-17.6143	4e-05	0.00106736
093 RT-ZI Gnb3 Gaba	Stox1_Chr10:62261012-62261511	-17.4209	4e-05	0.00106736
093 RT-ZI Gnb3 Gaba	Ddx21_Chr10:62294014-62294513	-16.1095	4e-05	0.00106736
093 RT-ZI Gnb3 Gaba	Stox1_Chr10:62294014-62294513	-17.0955	8e-05	0.00205831
093 RT-ZI Gnb3 Gaba	Stox1_Chr10:62500132-62500631	-17.3371	4e-05	0.00106736
093 RT-ZI Gnb3 Gaba	Stox1_Chr10:62865078-62865577	-18.764	4e-05	0.00106736
093 RT-ZI Gnb3 Gaba	Dnajc12_Chr10:63748743-63749242	-16.1775	4e-05	0.00106736
093 RT-ZI Gnb3 Gaba	Nrbf2_Chr10:66814444-66814943	-16.2255	4e-05	0.00106736
093 RT-ZI Gnb3 Gaba	Ado_Chr10:67076403-67076902	-16.4815	4e-05	0.00106736
093 RT-ZI Gnb3 Gaba	Zfp365_Chr10:68103405-68103904	-16.8546	4e-05	0.00106736
093 RT-ZI Gnb3 Gaba	Ccdc6_Chr10:70328021-70328520	-16.5087	4e-05	0.00106736
093 RT-ZI Gnb3 Gaba	Ipmk_Chr10:71469405-71469904	-17.1352	4e-05	0.00106736
093 RT-ZI Gnb3 Gaba	Tfam_Chr10:71469405-71469904	-16.2261	4e-05	0.00106736
093 RT-ZI Gnb3 Gaba	Gucd1_Chr10:75124382-75124881	-16.9229	4e-05	0.00106736
093 RT-ZI Gnb3 Gaba	Gstt2_Chr10:75486344-75486843	-17.4597	4e-05	0.00106736
093 RT-ZI Gnb3 Gaba	Gucd1_Chr10:75486344-75486843	-17.4706	4e-05	0.00106736
093 RT-ZI Gnb3 Gaba	Zfp280b_Chr10:75684081-75684580	-17.6217	4e-05	0.00106736
093 RT-ZI Gnb3 Gaba	Gstt2_Chr10:75694250-75694749	-17.345	4e-05	0.00106736
093 RT-ZI Gnb3 Gaba	Zfp280b_Chr10:75694250-75694749	-17.646	4e-05	0.00106736
093 RT-ZI Gnb3 Gaba	Gstt2_Chr10:75704044-75704543	-17.9015	4e-05	0.00106736
093 RT-ZI Gnb3 Gaba	Gucd1_Chr10:75704044-75704543	-18.2947	4e-05	0.00106736
093 RT-ZI Gnb3 Gaba	Lrrc75b_Chr10:75743960-75744459	-18.0219	0.00036	0.00889879
093 RT-ZI Gnb3 Gaba	Gstt2_Chr10:75853349-75853848	-17.3732	4e-05	0.00106736
093 RT-ZI Gnb3 Gaba	Gucd1_Chr10:75853349-75853848	-17.2816	4e-05	0.00106736
093 RT-ZI Gnb3 Gaba	Lrrc75b_Chr10:75853349-75853848	-17.6818	4e-05	0.00106736
093 RT-ZI Gnb3 Gaba	Zfp280b_Chr10:75853349-75853848	-16.5454	4e-05	0.00106736
093 RT-ZI Gnb3 Gaba	Lrrc75b_Chr10:75873427-75873926	-17.926	4e-05	0.00106736
093 RT-ZI Gnb3 Gaba	Zfp280b_Chr10:75883062-75883561	-17.8719	4e-05	0.00106736
093 RT-ZI Gnb3 Gaba	Ginm1_Chr10:7605092-7605591	-15.9534	4e-05	0.00106736
093 RT-ZI Gnb3 Gaba	Zfp280b_Chr10:76317492-76317991	-17.6573	4e-05	0.00106736
093 RT-ZI Gnb3 Gaba	Pofut2_Chr10:77130463-77130962	-17.7229	4e-05	0.00106736
093 RT-ZI Gnb3 Gaba	Pofut2_Chr10:77243701-77244200	-17.0901	4e-05	0.00106736
093 RT-ZI Gnb3 Gaba	Ube2g2_Chr10:77353309-77353808	-16.3201	4e-05	0.00106736
093 RT-ZI Gnb3 Gaba	Pofut2_Chr10:77456469-77456968	-16.2379	4e-05	0.00106736
093 RT-ZI Gnb3 Gaba	Sumo3_Chr10:77506923-77507422	-16.5009	4e-05	0.00106736
093 RT-ZI Gnb3 Gaba	Trpm2_Chr10:77506923-77507422	-17.561	8e-05	0.00205831
093 RT-ZI Gnb3 Gaba	Ube2g2_Chr10:77506923-77507422	-16.064	4e-05	0.00106736
093 RT-ZI Gnb3 Gaba	Pwp2_Chr10:78018642-78019141	-16.6602	4e-05	0.00106736
093 RT-ZI Gnb3 Gaba	Cfap410_Chr10:78028006-78028505	-16.5342	4e-05	0.00106736
093 RT-ZI Gnb3 Gaba	Cfap410_Chr10:78100903-78101402	-15.8106	4e-05	0.00106736
093 RT-ZI Gnb3 Gaba	Gatd3a_Chr10:78159158-78159657	-16.7867	4e-05	0.00106736
093 RT-ZI Gnb3 Gaba	Pwp2_Chr10:78211240-78211739	-15.3317	4e-05	0.00106736
093 RT-ZI Gnb3 Gaba	Trpm2_Chr10:78211240-78211739	-17.0781	4e-05	0.00106736
093 RT-ZI Gnb3 Gaba	Gatd3a_Chr10:78260291-78260790	-16.7342	4e-05	0.00106736
093 RT-ZI Gnb3 Gaba	Pwp2_Chr10:78260291-78260790	-15.553	4e-05	0.00106736
093 RT-ZI Gnb3 Gaba	Slc1a6_Chr10:78440778-78441277	1.62202	0.00052	0.0127543
093 RT-ZI Gnb3 Gaba	Gatd3a_Chr10:78457747-78458246	-17.5315	4e-05	0.00106736
093 RT-ZI Gnb3 Gaba	Gatd3a_Chr10:78487625-78488124	-16.5212	4e-05	0.00106736
093 RT-ZI Gnb3 Gaba	Ginm1_Chr10:7883452-7883951	-15.625	4e-05	0.00106736
093 RT-ZI Gnb3 Gaba	Rnf126_Chr10:79595165-79595664	-17.0809	4e-05	0.00106736
093 RT-ZI Gnb3 Gaba	Arid3a_Chr10:79607900-79608399	-17.6345	4e-05	0.00106736
093 RT-ZI Gnb3 Gaba	Abca7_Chr10:79649275-79649774	-17.9336	4e-05	0.00106736
093 RT-ZI Gnb3 Gaba	Arid3a_Chr10:79649275-79649774	-17.9898	4e-05	0.00106736
093 RT-ZI Gnb3 Gaba	Polrmt_Chr10:79649275-79649774	-18.2794	4e-05	0.00106736
093 RT-ZI Gnb3 Gaba	Ptbp1_Chr10:79695131-79695630	-16.0385	4e-05	0.00106736
093 RT-ZI Gnb3 Gaba	Pwwp3a_Chr10:79834708-79835207	-16.888	4e-05	0.00106736
093 RT-ZI Gnb3 Gaba	Rnf126_Chr10:79834708-79835207	-16.9016	4e-05	0.00106736
093 RT-ZI Gnb3 Gaba	Tpgs1_Chr10:79834708-79835207	-17.1107	4e-05	0.00106736
093 RT-ZI Gnb3 Gaba	Pwwp3a_Chr10:79840586-79841085	-16.7177	4e-05	0.00106736
093 RT-ZI Gnb3 Gaba	Polrmt_Chr10:79883587-79884086	-17.6081	4e-05	0.00106736
093 RT-ZI Gnb3 Gaba	Ptbp1_Chr10:79883587-79884086	-15.6344	4e-05	0.00106736
093 RT-ZI Gnb3 Gaba	Pwwp3a_Chr10:79883587-79884086	-16.9518	4e-05	0.00106736
093 RT-ZI Gnb3 Gaba	Fgf22_Chr10:79900837-79901336	-17.0882	4e-05	0.00106736
093 RT-ZI Gnb3 Gaba	Mbd3_Chr10:79900837-79901336	-16.7353	4e-05	0.00106736
093 RT-ZI Gnb3 Gaba	Rnf126_Chr10:79900837-79901336	-16.7566	4e-05	0.00106736
093 RT-ZI Gnb3 Gaba	Polrmt_Chr10:80190372-80190871	-18.3611	4e-05	0.00106736
093 RT-ZI Gnb3 Gaba	Apc2_Chr10:80199374-80199873	-17.2248	4e-05	0.00106736
093 RT-ZI Gnb3 Gaba	Gamt_Chr10:80199374-80199873	-17.8952	4e-05	0.00106736
093 RT-ZI Gnb3 Gaba	Mbd3_Chr10:80199374-80199873	-15.9094	4e-05	0.00106736
093 RT-ZI Gnb3 Gaba	Ptbp1_Chr10:80199374-80199873	-15.61	4e-05	0.00106736
093 RT-ZI Gnb3 Gaba	Arid3a_Chr10:80208698-80209197	-17.7915	4e-05	0.00106736
093 RT-ZI Gnb3 Gaba	Btbd2_Chr10:80208698-80209197	-16.6365	4e-05	0.00106736
093 RT-ZI Gnb3 Gaba	Cbarp_Chr10:80208698-80209197	0.737424	0.00304	0.0699911
093 RT-ZI Gnb3 Gaba	Tcf3_Chr10:80208698-80209197	-17.7213	4e-05	0.00106736
093 RT-ZI Gnb3 Gaba	Midn_Chr10:80322601-80323100	-17.3744	4e-05	0.00106736
093 RT-ZI Gnb3 Gaba	Tcf3_Chr10:80322601-80323100	-17.3613	4e-05	0.00106736
093 RT-ZI Gnb3 Gaba	Tcf3_Chr10:80323235-80323734	-17.7578	4e-05	0.00106736
093 RT-ZI Gnb3 Gaba	Arid3a_Chr10:80350214-80350713	-17.8187	4e-05	0.00106736
093 RT-ZI Gnb3 Gaba	Pwwp3a_Chr10:80350214-80350713	-16.9145	4e-05	0.00106736
093 RT-ZI Gnb3 Gaba	Abca7_Chr10:80357807-80358306	-19.1273	4e-05	0.00106736
093 RT-ZI Gnb3 Gaba	Btbd2_Chr10:80357807-80358306	-16.8073	4e-05	0.00106736
093 RT-ZI Gnb3 Gaba	Sppl2b_Chr10:80357807-80358306	-17.0655	4e-05	0.00106736
093 RT-ZI Gnb3 Gaba	Polr2e_Chr10:80446119-80446618	-16.4703	4e-05	0.00106736
093 RT-ZI Gnb3 Gaba	Tcf3_Chr10:80446119-80446618	-17.739	4e-05	0.00106736
093 RT-ZI Gnb3 Gaba	Rps15_Chr10:80475192-80475691	0.396502	0.0028	0.0648781
093 RT-ZI Gnb3 Gaba	Gng7_Chr10:80548596-80549095	-15.4207	4e-05	0.00106736
093 RT-ZI Gnb3 Gaba	Mbd3_Chr10:80548596-80549095	-15.7065	4e-05	0.00106736
093 RT-ZI Gnb3 Gaba	Midn_Chr10:80548596-80549095	-17.2756	4e-05	0.00106736
093 RT-ZI Gnb3 Gaba	Sppl2b_Chr10:80548596-80549095	-16.1355	4e-05	0.00106736
093 RT-ZI Gnb3 Gaba	Lmnb2_Chr10:80566239-80566738	-16.4681	4e-05	0.00106736
093 RT-ZI Gnb3 Gaba	Tcf3_Chr10:80566239-80566738	-17.7608	4e-05	0.00106736
093 RT-ZI Gnb3 Gaba	Tcf3_Chr10:80578303-80578802	-17.8217	4e-05	0.00106736
093 RT-ZI Gnb3 Gaba	Abhd17a_Chr10:80747326-80747825	-16.6852	4e-05	0.00106736
093 RT-ZI Gnb3 Gaba	Plk5_Chr10:80747326-80747825	-17.4113	4e-05	0.00106736
093 RT-ZI Gnb3 Gaba	Tcf3_Chr10:80747326-80747825	-17.1321	4e-05	0.00106736
093 RT-ZI Gnb3 Gaba	Lmnb2_Chr10:80784813-80785312	-16.3464	4e-05	0.00106736
093 RT-ZI Gnb3 Gaba	Tcf3_Chr10:80784813-80785312	-17.3828	4e-05	0.00106736
093 RT-ZI Gnb3 Gaba	Dapk3_Chr10:80939643-80940142	-17.4326	4e-05	0.00106736
093 RT-ZI Gnb3 Gaba	Izumo4_Chr10:81082211-81082710	0.730535	0.00392	0.0889985
093 RT-ZI Gnb3 Gaba	Ncln_Chr10:81082211-81082710	-15.8897	4e-05	0.00106736
093 RT-ZI Gnb3 Gaba	Btbd2_Chr10:81136219-81136718	-18.0877	4e-05	0.00106736
093 RT-ZI Gnb3 Gaba	Dapk3_Chr10:81174878-81175377	1.31319	0.0044	0.0988776
093 RT-ZI Gnb3 Gaba	Fzr1_Chr10:81267891-81268390	-18.079	4e-05	0.00106736
093 RT-ZI Gnb3 Gaba	Sppl2b_Chr10:81304773-81305272	-16.1025	4e-05	0.00106736
093 RT-ZI Gnb3 Gaba	Nfic_Chr10:81413847-81414346	0.927515	0.00232	0.0544027
093 RT-ZI Gnb3 Gaba	Celf5_Chr10:81432790-81433289	0.919653	0.00112	0.0269619
093 RT-ZI Gnb3 Gaba	Fzr1_Chr10:81450094-81450593	-17.7877	4e-05	0.00106736
093 RT-ZI Gnb3 Gaba	Sgta_Chr10:81526687-81527186	-17.436	4e-05	0.00106736
093 RT-ZI Gnb3 Gaba	Zfr2_Chr10:81551486-81551985	0.730048	0.00144	0.0343311
093 RT-ZI Gnb3 Gaba	Ginm1_Chr10:8240188-8240687	-16.0843	4e-05	0.00106736
093 RT-ZI Gnb3 Gaba	1190007I07Rik_Chr10:83000031-83000530	-16.1743	4e-05	0.00106736
093 RT-ZI Gnb3 Gaba	Nfyb_Chr10:83000031-83000530	-17.5368	4e-05	0.00106736
093 RT-ZI Gnb3 Gaba	Chst11_Chr10:83182449-83182948	0.943716	0.00136	0.0324849
093 RT-ZI Gnb3 Gaba	1500009L16Rik_Chr10:83242273-83242772	-15.94	4e-05	0.00106736
093 RT-ZI Gnb3 Gaba	Nfyb_Chr10:83242273-83242772	-17.4541	4e-05	0.00106736
093 RT-ZI Gnb3 Gaba	Aldh1l2_Chr10:83729452-83729951	-15.878	4e-05	0.00106736
093 RT-ZI Gnb3 Gaba	Aldh1l2_Chr10:83784905-83785404	-18.4739	4e-05	0.00106736
093 RT-ZI Gnb3 Gaba	Cry1_Chr10:84772707-84773206	-17.597	4e-05	0.00106736
093 RT-ZI Gnb3 Gaba	Btbd11_Chr10:85013375-85013874	0.805303	0.00092	0.0222796
093 RT-ZI Gnb3 Gaba	Pwp1_Chr10:85429094-85429593	-17.2086	4e-05	0.00106736
093 RT-ZI Gnb3 Gaba	Cry1_Chr10:85510465-85510964	-17.7686	4e-05	0.00106736
093 RT-ZI Gnb3 Gaba	Mterf2_Chr10:85510465-85510964	-16.3319	4e-05	0.00106736
093 RT-ZI Gnb3 Gaba	Nt5dc3_Chr10:86473590-86474089	-16.9402	4e-05	0.00106736
093 RT-ZI Gnb3 Gaba	Dram1_Chr10:88327346-88327845	-17.6105	4e-05	0.00106736
093 RT-ZI Gnb3 Gaba	Ano4_Chr10:89103410-89103909	0.728114	8e-05	0.00205831
093 RT-ZI Gnb3 Gaba	1500026H17Rik_Chr10:90081566-90082065	-16.0315	4e-05	0.00106736
093 RT-ZI Gnb3 Gaba	Ikbip_Chr10:91170481-91170980	-16.3044	4e-05	0.00106736
093 RT-ZI Gnb3 Gaba	Gm48749_Chr10:9117834-9118333	0.815897	0.00144	0.0343311
093 RT-ZI Gnb3 Gaba	Tmpo_Chr10:91271107-91271606	-16.5773	4e-05	0.00106736
093 RT-ZI Gnb3 Gaba	Tmpo_Chr10:91326571-91327070	-16.6109	4e-05	0.00106736
093 RT-ZI Gnb3 Gaba	Tmpo_Chr10:91345302-91345801	-16.5701	4e-05	0.00106736
093 RT-ZI Gnb3 Gaba	Ntn4_Chr10:93255125-93255624	-17.7365	8e-05	0.00205831
093 RT-ZI Gnb3 Gaba	Cfap54_Chr10:93577404-93577903	-16.8082	4e-05	0.00106736
093 RT-ZI Gnb3 Gaba	Ntn4_Chr10:93577404-93577903	-17.5622	0.0002	0.00500355
093 RT-ZI Gnb3 Gaba	Ntn4_Chr10:93611337-93611836	-17.5679	0.00012	0.00303964
093 RT-ZI Gnb3 Gaba	Cep83os_Chr10:94428157-94428656	-15.8095	4e-05	0.00106736
093 RT-ZI Gnb3 Gaba	Cradd_Chr10:94919466-94919965	-16.1447	4e-05	0.00106736
093 RT-ZI Gnb3 Gaba	Socs2_Chr10:94919466-94919965	-17.8263	4e-05	0.00106736
093 RT-ZI Gnb3 Gaba	Socs2_Chr10:94992046-94992545	-17.0723	4e-05	0.00106736
093 RT-ZI Gnb3 Gaba	Cep83os_Chr10:95088062-95088561	-16.4494	4e-05	0.00106736
093 RT-ZI Gnb3 Gaba	Socs2_Chr10:95264683-95265182	-16.8634	4e-05	0.00106736
093 RT-ZI Gnb3 Gaba	Socs2_Chr10:95790701-95791200	-17.4793	4e-05	0.00106736
093 RT-ZI Gnb3 Gaba	Kat2a_Chr11:100311764-100312263	-16.6522	4e-05	0.00106736
093 RT-ZI Gnb3 Gaba	Nt5c3b_Chr11:100312322-100312821	-17.3289	4e-05	0.00106736
093 RT-ZI Gnb3 Gaba	Nt5c3b_Chr11:100332794-100333293	-17.2332	4e-05	0.00106736
093 RT-ZI Gnb3 Gaba	Eif1_Chr11:100407991-100408490	0.535709	0.00416	0.0939215
093 RT-ZI Gnb3 Gaba	Nt5c3b_Chr11:100407991-100408490	-17.8384	4e-05	0.00106736
093 RT-ZI Gnb3 Gaba	Klhl10_Chr11:100626541-100627040	-16.8824	4e-05	0.00106736
093 RT-ZI Gnb3 Gaba	Rab5c_Chr11:100626541-100627040	-18.2441	4e-05	0.00106736
093 RT-ZI Gnb3 Gaba	Plekhh3_Chr11:100702370-100702869	-18.3038	4e-05	0.00106736
093 RT-ZI Gnb3 Gaba	Cntnap1_Chr11:100761667-100762166	0.91672	0.00144	0.0343311
093 RT-ZI Gnb3 Gaba	Tubg2_Chr11:100761667-100762166	-18.1628	4e-05	0.00106736
093 RT-ZI Gnb3 Gaba	Coa3_Chr11:100806689-100807188	1.00209	0.00384	0.0872799
093 RT-ZI Gnb3 Gaba	Klhl10_Chr11:100806689-100807188	-16.7244	4e-05	0.00106736
093 RT-ZI Gnb3 Gaba	P3h4_Chr11:100806689-100807188	-15.7743	4e-05	0.00106736
093 RT-ZI Gnb3 Gaba	Plekhh3_Chr11:100806689-100807188	-16.9585	4e-05	0.00106736
093 RT-ZI Gnb3 Gaba	Tubg2_Chr11:100806689-100807188	-15.6469	4e-05	0.00106736
093 RT-ZI Gnb3 Gaba	Kat2a_Chr11:100893331-100893830	-16.6818	4e-05	0.00106736
093 RT-ZI Gnb3 Gaba	Psme3_Chr11:100983302-100983801	-17.375	4e-05	0.00106736
093 RT-ZI Gnb3 Gaba	Ramp2_Chr11:100983302-100983801	-18.0824	4e-05	0.00106736
093 RT-ZI Gnb3 Gaba	Atp6v0a1_Chr11:101138284-101138783	0.684285	0.00056	0.0137155
093 RT-ZI Gnb3 Gaba	Plekhh3_Chr11:101138284-101138783	-17.5532	4e-05	0.00106736
093 RT-ZI Gnb3 Gaba	Psme3_Chr11:101138284-101138783	-17.5161	4e-05	0.00106736
093 RT-ZI Gnb3 Gaba	Kat2a_Chr11:101143663-101144162	-16.8973	4e-05	0.00106736
093 RT-ZI Gnb3 Gaba	Psme3_Chr11:101143663-101144162	-17.6556	4e-05	0.00106736
093 RT-ZI Gnb3 Gaba	Tubg2_Chr11:101143663-101144162	-16.9172	4e-05	0.00106736
093 RT-ZI Gnb3 Gaba	Coasy_Chr11:101200971-101201470	-17.982	0.00052	0.0127543
093 RT-ZI Gnb3 Gaba	Rdm1_Chr11:101200971-101201470	-17.2153	4e-05	0.00106736
093 RT-ZI Gnb3 Gaba	Rnd2_Chr11:101200971-101201470	-17.0106	4e-05	0.00106736
093 RT-ZI Gnb3 Gaba	Rundc1_Chr11:101200971-101201470	-16.5967	4e-05	0.00106736
093 RT-ZI Gnb3 Gaba	Vat1_Chr11:101200971-101201470	-16.4919	4e-05	0.00106736
093 RT-ZI Gnb3 Gaba	Coasy_Chr11:101269673-101270172	-16.4397	4e-05	0.00106736
093 RT-ZI Gnb3 Gaba	Dhx8_Chr11:101269673-101270172	-17.4718	4e-05	0.00106736
093 RT-ZI Gnb3 Gaba	Mlx_Chr11:101269673-101270172	-16.9752	4e-05	0.00106736
093 RT-ZI Gnb3 Gaba	Arl4d_Chr11:101323518-101324017	-16.7951	4e-05	0.00106736
093 RT-ZI Gnb3 Gaba	Plekhh3_Chr11:101323518-101324017	-17.1231	4e-05	0.00106736
093 RT-ZI Gnb3 Gaba	Mpp3_Chr11:101604349-101604848	-17.8958	4e-05	0.00106736
093 RT-ZI Gnb3 Gaba	Tubg2_Chr11:101617800-101618299	-16.0132	4e-05	0.00106736
093 RT-ZI Gnb3 Gaba	Plekhh3_Chr11:101645920-101646419	-18.0027	4e-05	0.00106736
093 RT-ZI Gnb3 Gaba	Mpp3_Chr11:101657733-101658232	-17.9789	0.0002	0.00500355
093 RT-ZI Gnb3 Gaba	Psme3_Chr11:101657733-101658232	-17.8565	0.00012	0.00303964
093 RT-ZI Gnb3 Gaba	Rdm1_Chr11:101700313-101700812	-17.1394	4e-05	0.00106736
093 RT-ZI Gnb3 Gaba	Mpp3_Chr11:101813173-101813672	-18.0935	4e-05	0.00106736
093 RT-ZI Gnb3 Gaba	Rnd2_Chr11:101813173-101813672	-17.3952	4e-05	0.00106736
093 RT-ZI Gnb3 Gaba	Arl4d_Chr11:101842289-101842788	-16.266	4e-05	0.00106736
093 RT-ZI Gnb3 Gaba	Atxn7l3_Chr11:101842289-101842788	-16.3677	4e-05	0.00106736
093 RT-ZI Gnb3 Gaba	G6pc3_Chr11:101842289-101842788	1.83711	0.00016	0.0040227
093 RT-ZI Gnb3 Gaba	Dhx8_Chr11:101937004-101937503	-17.7761	4e-05	0.00106736
093 RT-ZI Gnb3 Gaba	Lsm12_Chr11:101937004-101937503	-17.4359	4e-05	0.00106736
093 RT-ZI Gnb3 Gaba	Mpp3_Chr11:101937004-101937503	-17.8462	8e-05	0.00205831
093 RT-ZI Gnb3 Gaba	Mpp3_Chr11:102026753-102027252	-17.9223	4e-05	0.00106736
093 RT-ZI Gnb3 Gaba	Rdm1_Chr11:102026753-102027252	-17.2734	4e-05	0.00106736
093 RT-ZI Gnb3 Gaba	Arl4d_Chr11:102053761-102054260	-16.9521	4e-05	0.00106736
093 RT-ZI Gnb3 Gaba	Atxn7l3_Chr11:102053761-102054260	-16.9331	4e-05	0.00106736
093 RT-ZI Gnb3 Gaba	Dhx8_Chr11:102053761-102054260	-16.6711	4e-05	0.00106736
093 RT-ZI Gnb3 Gaba	Rdm1_Chr11:102053761-102054260	-16.9565	4e-05	0.00106736
093 RT-ZI Gnb3 Gaba	Mpp3_Chr11:102061078-102061577	-17.5093	4e-05	0.00106736
093 RT-ZI Gnb3 Gaba	Rdm1_Chr11:102061078-102061577	-17.3978	0.0002	0.00500355
093 RT-ZI Gnb3 Gaba	Slc25a39_Chr11:102061078-102061577	-16.1019	4e-05	0.00106736
093 RT-ZI Gnb3 Gaba	Atxn7l3_Chr11:102096922-102097421	-17.8027	4e-05	0.00106736
093 RT-ZI Gnb3 Gaba	Slc25a39_Chr11:102245012-102245511	-17.537	4e-05	0.00106736
093 RT-ZI Gnb3 Gaba	Atxn7l3_Chr11:102267380-102267879	-18.3303	4e-05	0.00106736
093 RT-ZI Gnb3 Gaba	Mpp3_Chr11:102467001-102467500	-17.5988	4e-05	0.00106736
093 RT-ZI Gnb3 Gaba	Eftud2_Chr11:102888135-102888634	-16.9043	4e-05	0.00106736
093 RT-ZI Gnb3 Gaba	Arhgap27os2_Chr11:103326857-103327356	-15.378	4e-05	0.00106736
093 RT-ZI Gnb3 Gaba	Gosr2_Chr11:103326857-103327356	-16.0267	4e-05	0.00106736
093 RT-ZI Gnb3 Gaba	Hexim2_Chr11:103326857-103327356	-17.274	4e-05	0.00106736
093 RT-ZI Gnb3 Gaba	Eftud2_Chr11:103332473-103332972	-18.0231	4e-05	0.00106736
093 RT-ZI Gnb3 Gaba	Hexim2_Chr11:103402176-103402675	-16.8242	4e-05	0.00106736
093 RT-ZI Gnb3 Gaba	Gm11659_Chr11:103961133-103961632	1.03945	0.00376	0.0855959
093 RT-ZI Gnb3 Gaba	Crhr1_Chr11:103997305-103997804	-16.4326	4e-05	0.00106736
093 RT-ZI Gnb3 Gaba	Ern1_Chr11:106648211-106648710	-16.5073	4e-05	0.00106736
093 RT-ZI Gnb3 Gaba	Ern1_Chr11:106679741-106680240	-16.8103	4e-05	0.00106736
093 RT-ZI Gnb3 Gaba	Smarcd2_Chr11:106737131-106737630	-18.1352	4e-05	0.00106736
093 RT-ZI Gnb3 Gaba	Cacng4_Chr11:107511866-107512365	-16.103	4e-05	0.00106736
093 RT-ZI Gnb3 Gaba	Cacng4_Chr11:107629471-107629970	-16.2235	4e-05	0.00106736
093 RT-ZI Gnb3 Gaba	Wipi1_Chr11:109218086-109218585	-17.3913	4e-05	0.00106736
093 RT-ZI Gnb3 Gaba	Axin2_Chr11:109344257-109344756	-16.624	4e-05	0.00106736
093 RT-ZI Gnb3 Gaba	Arsg_Chr11:109891901-109892400	-15.8222	4e-05	0.00106736
093 RT-ZI Gnb3 Gaba	Wipi1_Chr11:109891901-109892400	-16.9108	4e-05	0.00106736
093 RT-ZI Gnb3 Gaba	Abca8a_Chr11:110595345-110595844	-15.1598	4e-05	0.00106736
093 RT-ZI Gnb3 Gaba	Map2k6_Chr11:110595345-110595844	-16.3005	4e-05	0.00106736
093 RT-ZI Gnb3 Gaba	Cog1_Chr11:113297712-113298211	-16.6067	4e-05	0.00106736
093 RT-ZI Gnb3 Gaba	Cog1_Chr11:113865525-113866024	-15.9827	4e-05	0.00106736
093 RT-ZI Gnb3 Gaba	Ttyh2_Chr11:114512615-114513114	-15.7002	4e-05	0.00106736
093 RT-ZI Gnb3 Gaba	Hid1_Chr11:114912728-114913227	-17.2193	4e-05	0.00106736
093 RT-ZI Gnb3 Gaba	Tmem104_Chr11:114912728-114913227	-18.1526	8e-05	0.00205831
093 RT-ZI Gnb3 Gaba	Nat9_Chr11:115202278-115202777	-17.1354	4e-05	0.00106736
093 RT-ZI Gnb3 Gaba	Kctd2_Chr11:115226900-115227399	-15.9259	4e-05	0.00106736
093 RT-ZI Gnb3 Gaba	Nup85_Chr11:115226900-115227399	-17.1245	4e-05	0.00106736
093 RT-ZI Gnb3 Gaba	Nat9_Chr11:115250012-115250511	-17.5757	4e-05	0.00106736
093 RT-ZI Gnb3 Gaba	Rab37_Chr11:115250012-115250511	-17.9077	4e-05	0.00106736
093 RT-ZI Gnb3 Gaba	Tmem104_Chr11:115250012-115250511	-17.5104	4e-05	0.00106736
093 RT-ZI Gnb3 Gaba	Cdr2l_Chr11:115354075-115354574	-17.8301	4e-05	0.00106736
093 RT-ZI Gnb3 Gaba	Mif4gd_Chr11:115354075-115354574	-16.7977	8e-05	0.00205831
093 RT-ZI Gnb3 Gaba	Nat9_Chr11:115354075-115354574	-17.5892	4e-05	0.00106736
093 RT-ZI Gnb3 Gaba	Nup85_Chr11:115354075-115354574	-15.9279	4e-05	0.00106736
093 RT-ZI Gnb3 Gaba	Fdxr_Chr11:115358363-115358862	-17.6842	4e-05	0.00106736
093 RT-ZI Gnb3 Gaba	Tmem104_Chr11:115358363-115358862	-17.2284	8e-05	0.00205831
093 RT-ZI Gnb3 Gaba	Fdxr_Chr11:115412598-115413097	-17.4548	4e-05	0.00106736
093 RT-ZI Gnb3 Gaba	Slc25a19_Chr11:115412598-115413097	-17.6156	4e-05	0.00106736
093 RT-ZI Gnb3 Gaba	Mif4gd_Chr11:115427789-115428288	-17.1089	0.00024	0.00598212
093 RT-ZI Gnb3 Gaba	Mif4gd_Chr11:115435921-115436420	-16.9149	8e-05	0.00205831
093 RT-ZI Gnb3 Gaba	Recql5_Chr11:115435921-115436420	-17.8329	4e-05	0.00106736
093 RT-ZI Gnb3 Gaba	Tmem104_Chr11:115435921-115436420	-17.6113	4e-05	0.00106736
093 RT-ZI Gnb3 Gaba	Fdxr_Chr11:115714489-115714988	-17.2265	4e-05	0.00106736
093 RT-ZI Gnb3 Gaba	Mif4gd_Chr11:115714489-115714988	-17.2747	4e-05	0.00106736
093 RT-ZI Gnb3 Gaba	Slc25a19_Chr11:115714489-115714988	-16.3554	4e-05	0.00106736
093 RT-ZI Gnb3 Gaba	Recql5_Chr11:115859499-115859998	-17.8812	4e-05	0.00106736
093 RT-ZI Gnb3 Gaba	Mif4gd_Chr11:115920056-115920555	-17.0769	0.00024	0.00598212
093 RT-ZI Gnb3 Gaba	Srp68_Chr11:115920056-115920555	-16.4591	4e-05	0.00106736
093 RT-ZI Gnb3 Gaba	Mif4gd_Chr11:115956329-115956828	-17.5866	0.00016	0.0040227
093 RT-ZI Gnb3 Gaba	Mif4gd_Chr11:116004755-116005254	-17.3219	4e-05	0.00106736
093 RT-ZI Gnb3 Gaba	Mif4gd_Chr11:116018043-116018542	-16.8377	0.0002	0.00500355
093 RT-ZI Gnb3 Gaba	Nup85_Chr11:116018043-116018542	-15.9012	4e-05	0.00106736
093 RT-ZI Gnb3 Gaba	Galk1_Chr11:116023675-116024174	-17.6061	4e-05	0.00106736
093 RT-ZI Gnb3 Gaba	Galk1_Chr11:116232516-116233015	-16.4655	4e-05	0.00106736
093 RT-ZI Gnb3 Gaba	Galk1_Chr11:116294281-116294780	-16.2453	4e-05	0.00106736
093 RT-ZI Gnb3 Gaba	Galk1_Chr11:116445932-116446431	-16.2869	4e-05	0.00106736
093 RT-ZI Gnb3 Gaba	Mrpl38_Chr11:116445932-116446431	1.01517	0.00432	0.0972307
093 RT-ZI Gnb3 Gaba	Prpsap1_Chr11:116445932-116446431	-16.6736	4e-05	0.00106736
093 RT-ZI Gnb3 Gaba	Galk1_Chr11:116463769-116464268	-16.5248	8e-05	0.00205831
093 RT-ZI Gnb3 Gaba	Ubald2_Chr11:116643200-116643699	-17.0464	4e-05	0.00106736
093 RT-ZI Gnb3 Gaba	Ube2o_Chr11:116885145-116885644	0.899343	0.00264	0.0614376
093 RT-ZI Gnb3 Gaba	Sec14l1_Chr11:116993961-116994460	-16.558	4e-05	0.00106736
093 RT-ZI Gnb3 Gaba	Jmjd6_Chr11:117028892-117029391	-16.9339	4e-05	0.00106736
093 RT-ZI Gnb3 Gaba	Jmjd6_Chr11:117035737-117036236	-17.1494	4e-05	0.00106736
093 RT-ZI Gnb3 Gaba	Jmjd6_Chr11:117177232-117177731	-17.1814	4e-05	0.00106736
093 RT-ZI Gnb3 Gaba	Tha1_Chr11:117627687-117628186	-16.9423	4e-05	0.00106736
093 RT-ZI Gnb3 Gaba	Tha1_Chr11:117628272-117628771	-18.0338	4e-05	0.00106736
093 RT-ZI Gnb3 Gaba	Tha1_Chr11:117824548-117825047	-16.6639	4e-05	0.00106736
093 RT-ZI Gnb3 Gaba	Zpbp_Chr11:11788372-11788871	-16.5467	4e-05	0.00106736
093 RT-ZI Gnb3 Gaba	Cant1_Chr11:118021704-118022203	-15.8566	4e-05	0.00106736
093 RT-ZI Gnb3 Gaba	Tha1_Chr11:118021704-118022203	-16.3404	4e-05	0.00106736
093 RT-ZI Gnb3 Gaba	Tha1_Chr11:118043168-118043667	-16.7481	4e-05	0.00106736
093 RT-ZI Gnb3 Gaba	Cant1_Chr11:118068734-118069233	-16.1608	4e-05	0.00106736
093 RT-ZI Gnb3 Gaba	Usp36_Chr11:118068734-118069233	1.37121	0.00036	0.00889879
093 RT-ZI Gnb3 Gaba	Tha1_Chr11:118074841-118075340	-16.999	4e-05	0.00106736
093 RT-ZI Gnb3 Gaba	Tha1_Chr11:118103920-118104419	-17.0038	4e-05	0.00106736
093 RT-ZI Gnb3 Gaba	Cant1_Chr11:118133095-118133594	-15.8974	4e-05	0.00106736
093 RT-ZI Gnb3 Gaba	Usp36_Chr11:118133626-118134125	1.20353	0.00192	0.0453059
093 RT-ZI Gnb3 Gaba	Zpbp_Chr11:11820098-11820597	-17.7909	4e-05	0.00106736
093 RT-ZI Gnb3 Gaba	Tha1_Chr11:118202362-118202861	-17.8986	4e-05	0.00106736
093 RT-ZI Gnb3 Gaba	Tha1_Chr11:118211694-118212193	-16.4356	4e-05	0.00106736
093 RT-ZI Gnb3 Gaba	Tha1_Chr11:118327564-118328063	-17.8058	4e-05	0.00106736
093 RT-ZI Gnb3 Gaba	Tha1_Chr11:118362856-118363355	-17.0446	4e-05	0.00106736
093 RT-ZI Gnb3 Gaba	Cyth1_Chr11:118436363-118436862	0.754054	0.00304	0.0699911
093 RT-ZI Gnb3 Gaba	Cant1_Chr11:118754487-118754986	-16.0866	4e-05	0.00106736
093 RT-ZI Gnb3 Gaba	Rnf213_Chr11:118975365-118975864	-16.2523	0.00012	0.00303964
093 RT-ZI Gnb3 Gaba	Cbx4_Chr11:119007711-119008210	-16.5666	4e-05	0.00106736
093 RT-ZI Gnb3 Gaba	Rnf213_Chr11:119007711-119008210	-17.2348	4e-05	0.00106736
093 RT-ZI Gnb3 Gaba	A930037H05Rik_Chr11:119126362-119126861	-17.6463	4e-05	0.00106736
093 RT-ZI Gnb3 Gaba	Rnf213_Chr11:119176250-119176749	-17.5138	4e-05	0.00106736
093 RT-ZI Gnb3 Gaba	Rnf213_Chr11:119363413-119363912	-17.4787	4e-05	0.00106736
093 RT-ZI Gnb3 Gaba	Zpbp_Chr11:11948863-11949362	-16.6758	4e-05	0.00106736
093 RT-ZI Gnb3 Gaba	2810410L24Rik_Chr11:119745197-119745696	-15.2901	4e-05	0.00106736
093 RT-ZI Gnb3 Gaba	2900052L18Rik_Chr11:119745197-119745696	-15.578	4e-05	0.00106736
093 RT-ZI Gnb3 Gaba	Bahcc1_Chr11:119745197-119745696	-16.6561	4e-05	0.00106736
093 RT-ZI Gnb3 Gaba	A930037H05Rik_Chr11:119788419-119788918	-17.6777	4e-05	0.00106736
093 RT-ZI Gnb3 Gaba	Nptx1_Chr11:119788419-119788918	-16.4637	4e-05	0.00106736
093 RT-ZI Gnb3 Gaba	A930037H05Rik_Chr11:119919836-119920335	-17.1496	4e-05	0.00106736
093 RT-ZI Gnb3 Gaba	2810410L24Rik_Chr11:120048115-120048614	-16.8021	4e-05	0.00106736
093 RT-ZI Gnb3 Gaba	Sirt7_Chr11:120160429-120160928	-16.8131	4e-05	0.00106736
093 RT-ZI Gnb3 Gaba	Ndufaf8_Chr11:120307495-120307994	-17.4395	4e-05	0.00106736
093 RT-ZI Gnb3 Gaba	Rfng_Chr11:120515482-120515981	-17.2079	4e-05	0.00106736
093 RT-ZI Gnb3 Gaba	Alyref_Chr11:120538894-120539393	-16.6223	4e-05	0.00106736
093 RT-ZI Gnb3 Gaba	Gm17178_Chr11:120538894-120539393	-17.3902	4e-05	0.00106736
093 RT-ZI Gnb3 Gaba	Hgs_Chr11:120538894-120539393	-16.3074	4e-05	0.00106736
093 RT-ZI Gnb3 Gaba	Ndufaf8_Chr11:120538894-120539393	-16.4934	4e-05	0.00106736
093 RT-ZI Gnb3 Gaba	Csnk1d_Chr11:120950759-120951258	-16.6071	4e-05	0.00106736
093 RT-ZI Gnb3 Gaba	Dus1l_Chr11:120950759-120951258	-17.6547	4e-05	0.00106736
093 RT-ZI Gnb3 Gaba	Gm17178_Chr11:120950759-120951258	-17.1012	4e-05	0.00106736
093 RT-ZI Gnb3 Gaba	Wdr45b_Chr11:120950759-120951258	-16.2591	4e-05	0.00106736
093 RT-ZI Gnb3 Gaba	Csnk1d_Chr11:121156317-121156816	-16.4374	4e-05	0.00106736
093 RT-ZI Gnb3 Gaba	Gm17178_Chr11:121156317-121156816	-16.9455	4e-05	0.00106736
093 RT-ZI Gnb3 Gaba	Rab40b_Chr11:121156317-121156816	-15.9651	4e-05	0.00106736
093 RT-ZI Gnb3 Gaba	Rfng_Chr11:121156317-121156816	-16.0492	4e-05	0.00106736
093 RT-ZI Gnb3 Gaba	Rab40b_Chr11:121176187-121176686	-16.1769	4e-05	0.00106736
093 RT-ZI Gnb3 Gaba	Rfng_Chr11:121176187-121176686	-16.272	4e-05	0.00106736
093 RT-ZI Gnb3 Gaba	Cybc1_Chr11:121652559-121653058	-17.1505	4e-05	0.00106736
093 RT-ZI Gnb3 Gaba	Fn3k_Chr11:121652559-121653058	-16.9902	4e-05	0.00106736
093 RT-ZI Gnb3 Gaba	Cobl_Chr11:12291260-12291759	0.781403	0.00256	0.0596992
093 RT-ZI Gnb3 Gaba	Cep68_Chr11:19830579-19831078	-16.6016	4e-05	0.00106736
093 RT-ZI Gnb3 Gaba	Ralb_Chr1:119894905-119895404	-16.5678	4e-05	0.00106736
093 RT-ZI Gnb3 Gaba	Lgalsl_Chr11:20400703-20401202	-16.5373	4e-05	0.00106736
093 RT-ZI Gnb3 Gaba	Lgalsl_Chr11:20531946-20532445	-16.7471	4e-05	0.00106736
093 RT-ZI Gnb3 Gaba	Rab1a_Chr11:20531946-20532445	0.873552	0.00424	0.0955999
093 RT-ZI Gnb3 Gaba	Lgalsl_Chr11:20631166-20631665	-16.8265	4e-05	0.00106736
093 RT-ZI Gnb3 Gaba	Lgalsl_Chr11:20655578-20656077	-16.6455	4e-05	0.00106736
093 RT-ZI Gnb3 Gaba	Zrsr1_Chr11:22698538-22699037	1.24361	0.00232	0.0544027
093 RT-ZI Gnb3 Gaba	0610010F05Rik_Chr11:24049158-24049657	0.797058	0.00084	0.0204056
093 RT-ZI Gnb3 Gaba	Tmem163_Chr1:127439372-127439871	-17.5538	4e-05	0.00106736
093 RT-ZI Gnb3 Gaba	Tmem163_Chr1:127496666-127497165	-17.753	4e-05	0.00106736
093 RT-ZI Gnb3 Gaba	Snrnp25_Chr11:31759831-31760330	-17.3939	4e-05	0.00106736
093 RT-ZI Gnb3 Gaba	Snrnp25_Chr11:31803501-31804000	-17.4964	8e-05	0.00205831
093 RT-ZI Gnb3 Gaba	Mfsd4a_Chr1:131982819-131983318	-17.5833	4e-05	0.00106736
093 RT-ZI Gnb3 Gaba	Snrnp25_Chr11:32020125-32020624	-17.4542	8e-05	0.00205831
093 RT-ZI Gnb3 Gaba	Sh3pxd2b_Chr11:32027587-32028086	-16.9329	4e-05	0.00106736
093 RT-ZI Gnb3 Gaba	Mpg_Chr11:32126172-32126671	-17.6784	4e-05	0.00106736
093 RT-ZI Gnb3 Gaba	Snrnp25_Chr11:32126172-32126671	-16.7448	4e-05	0.00106736
093 RT-ZI Gnb3 Gaba	Stk10_Chr11:32126172-32126671	-15.9569	4e-05	0.00106736
093 RT-ZI Gnb3 Gaba	Hba-a2_Chr11:32182397-32182896	-16.4229	4e-05	0.00106736
093 RT-ZI Gnb3 Gaba	Klhdc8a_Chr1:132237459-132237958	-16.5545	4e-05	0.00106736
093 RT-ZI Gnb3 Gaba	Stk10_Chr11:32303019-32303518	-15.9265	4e-05	0.00106736
093 RT-ZI Gnb3 Gaba	Ubtd2_Chr11:32303019-32303518	-16.127	4e-05	0.00106736
093 RT-ZI Gnb3 Gaba	Mfsd4a_Chr1:132322237-132322736	-16.2225	4e-05	0.00106736
093 RT-ZI Gnb3 Gaba	Rbbp5_Chr1:132322237-132322736	-16.1526	4e-05	0.00106736
093 RT-ZI Gnb3 Gaba	Tmcc2_Chr1:132322237-132322736	-17.2762	4e-05	0.00106736
093 RT-ZI Gnb3 Gaba	Stk10_Chr11:32324506-32325005	-17.0093	4e-05	0.00106736
093 RT-ZI Gnb3 Gaba	Hba-a1_Chr11:32340999-32341498	-16.7834	4e-05	0.00106736
093 RT-ZI Gnb3 Gaba	Snrnp25_Chr11:32340999-32341498	-17.34	4e-05	0.00106736
093 RT-ZI Gnb3 Gaba	Rbbp5_Chr1:132355766-132356265	-17.0687	4e-05	0.00106736
093 RT-ZI Gnb3 Gaba	Klhdc8a_Chr1:132367499-132367998	-17.0352	4e-05	0.00106736
093 RT-ZI Gnb3 Gaba	Stk10_Chr11:32373244-32373743	-17.3086	4e-05	0.00106736
093 RT-ZI Gnb3 Gaba	Hba-a1_Chr11:32405260-32405759	-15.6307	4e-05	0.00106736
093 RT-ZI Gnb3 Gaba	Rbbp5_Chr1:132602100-132602599	-16.8988	4e-05	0.00106736
093 RT-ZI Gnb3 Gaba	Klhdc8a_Chr1:132641282-132641781	-17.3295	4e-05	0.00106736
093 RT-ZI Gnb3 Gaba	Klhdc8a_Chr1:132677949-132678448	-17.5358	4e-05	0.00106736
093 RT-ZI Gnb3 Gaba	Rbbp5_Chr1:132677949-132678448	-16.0854	4e-05	0.00106736
093 RT-ZI Gnb3 Gaba	Klhdc8a_Chr1:132696235-132696734	-17.6255	4e-05	0.00106736
093 RT-ZI Gnb3 Gaba	Dstyk_Chr1:132836927-132837426	-16.8289	4e-05	0.00106736
093 RT-ZI Gnb3 Gaba	Ppp1r15b_Chr1:132836927-132837426	-17.2028	4e-05	0.00106736
093 RT-ZI Gnb3 Gaba	Tmcc2_Chr1:132851686-132852185	-17.1504	4e-05	0.00106736
093 RT-ZI Gnb3 Gaba	Mdm4_Chr1:132858704-132859203	0.470315	0.0044	0.0988776
093 RT-ZI Gnb3 Gaba	Ppp1r15b_Chr1:133101313-133101812	-16.7149	4e-05	0.00106736
093 RT-ZI Gnb3 Gaba	Zc3h11a_Chr1:133306706-133307205	-17.574	4e-05	0.00106736
093 RT-ZI Gnb3 Gaba	8430429K09Rik_Chr11:3332067-3332566	-18.05	4e-05	0.00106736
093 RT-ZI Gnb3 Gaba	Ppp1r15b_Chr1:133408009-133408508	-16.6502	4e-05	0.00106736
093 RT-ZI Gnb3 Gaba	Btg2_Chr1:133736139-133736638	-16.8484	4e-05	0.00106736
093 RT-ZI Gnb3 Gaba	Etnk2_Chr1:133736139-133736638	-17.4158	4e-05	0.00106736
093 RT-ZI Gnb3 Gaba	Cyb5r1_Chr1:134045850-134046349	-17.4394	4e-05	0.00106736
093 RT-ZI Gnb3 Gaba	Adora1_Chr1:134053166-134053665	-16.3897	4e-05	0.00106736
093 RT-ZI Gnb3 Gaba	Zc3h11a_Chr1:134060775-134061274	-19.4125	4e-05	0.00106736
093 RT-ZI Gnb3 Gaba	Btg2_Chr1:134098973-134099472	-17.5347	4e-05	0.00106736
093 RT-ZI Gnb3 Gaba	Rabif_Chr1:134098973-134099472	-17.8476	4e-05	0.00106736
093 RT-ZI Gnb3 Gaba	Zc3h11a_Chr1:134098973-134099472	-17.1035	4e-05	0.00106736
093 RT-ZI Gnb3 Gaba	Btg2_Chr1:134120124-134120623	-16.6462	4e-05	0.00106736
093 RT-ZI Gnb3 Gaba	Btg2_Chr1:134151505-134152004	-16.8958	4e-05	0.00106736
093 RT-ZI Gnb3 Gaba	Rabif_Chr1:134151505-134152004	-19.6193	4e-05	0.00106736
093 RT-ZI Gnb3 Gaba	Rabif_Chr1:134188808-134189307	-18.6063	4e-05	0.00106736
093 RT-ZI Gnb3 Gaba	Adora1_Chr1:134233008-134233507	-16.1778	4e-05	0.00106736
093 RT-ZI Gnb3 Gaba	Btg2_Chr1:134233008-134233507	-16.6687	4e-05	0.00106736
093 RT-ZI Gnb3 Gaba	Btg2_Chr1:134244137-134244636	-16.3232	4e-05	0.00106736
093 RT-ZI Gnb3 Gaba	Rabif_Chr1:134344496-134344995	-18.0494	4e-05	0.00106736
093 RT-ZI Gnb3 Gaba	Cyb5r1_Chr1:134846227-134846726	-16.564	4e-05	0.00106736
093 RT-ZI Gnb3 Gaba	Eif4enif1_Chr11:3538994-3539493	0.910752	0.00408	0.0922797
093 RT-ZI Gnb3 Gaba	Lactb2_Chr1:13561465-13561964	-16.0593	4e-05	0.00106736
093 RT-ZI Gnb3 Gaba	Timm17a_Chr1:135700547-135701046	1.01403	0.00296	0.0683199
093 RT-ZI Gnb3 Gaba	Shisa4_Chr1:135728876-135729375	0.655916	0.00296	0.0683199
093 RT-ZI Gnb3 Gaba	Csrp1_Chr1:135782674-135783173	1.18056	0.00256	0.0596992
093 RT-ZI Gnb3 Gaba	Wwc1_Chr11:35838264-35838763	-17.9752	4e-05	0.00106736
093 RT-ZI Gnb3 Gaba	Kif21b_Chr1:136076007-136076506	-16.4939	4e-05	0.00106736
093 RT-ZI Gnb3 Gaba	Tnni1_Chr1:136076007-136076506	-15.9947	4e-05	0.00106736
093 RT-ZI Gnb3 Gaba	8430429K09Rik_Chr11:3921418-3921917	-16.6807	4e-05	0.00106736
093 RT-ZI Gnb3 Gaba	Inpp5j_Chr11:3921418-3921917	-16.3536	4e-05	0.00106736
093 RT-ZI Gnb3 Gaba	Pla2g3_Chr11:3921418-3921917	-15.8216	4e-05	0.00106736
093 RT-ZI Gnb3 Gaba	Rnf215_Chr11:3921418-3921917	-17.5707	4e-05	0.00106736
093 RT-ZI Gnb3 Gaba	Tug1_Chr11:3921418-3921917	-16.7436	4e-05	0.00106736
093 RT-ZI Gnb3 Gaba	Rnf215_Chr11:4001546-4002045	-17.6097	4e-05	0.00106736
093 RT-ZI Gnb3 Gaba	Slu7_Chr11:43206244-43206743	-16.1097	4e-05	0.00106736
093 RT-ZI Gnb3 Gaba	Slu7_Chr11:43263800-43264299	1.7963	0.00376	0.0855959
093 RT-ZI Gnb3 Gaba	Adra1b_Chr11:43493940-43494439	-18.0498	4e-05	0.00106736
093 RT-ZI Gnb3 Gaba	Glrx2_Chr1:144151695-144152194	-16.5847	4e-05	0.00106736
093 RT-ZI Gnb3 Gaba	Cyfip2_Chr11:46091278-46091777	0.710464	0.00184	0.0435398
093 RT-ZI Gnb3 Gaba	Clint1_Chr11:46251919-46252418	0.950144	0.00076	0.0184932
093 RT-ZI Gnb3 Gaba	Fndc9_Chr11:46251919-46252418	-16.7686	4e-05	0.00106736
093 RT-ZI Gnb3 Gaba	Adam19_Chr11:46258133-46258632	-17.2562	0.00024	0.00598212
093 RT-ZI Gnb3 Gaba	Thoc5_Chr11:4865802-4866301	-17.5297	4e-05	0.00106736
093 RT-ZI Gnb3 Gaba	Mgat1_Chr11:49727821-49728320	-16.0047	4e-05	0.00106736
093 RT-ZI Gnb3 Gaba	Mrnip_Chr11:49727821-49728320	-17.0401	4e-05	0.00106736
093 RT-ZI Gnb3 Gaba	Nefh_Chr11:4973136-4973635	-17.89	4e-05	0.00106736
093 RT-ZI Gnb3 Gaba	Gm26542_Chr11:49818787-49819286	-17.2996	4e-05	0.00106736
093 RT-ZI Gnb3 Gaba	Rasgef1c_Chr11:49818787-49819286	-16.6645	4e-05	0.00106736
093 RT-ZI Gnb3 Gaba	Gm26542_Chr11:49871808-49872307	-17.3764	4e-05	0.00106736
093 RT-ZI Gnb3 Gaba	Rasgef1c_Chr11:49918495-49918994	-18.0514	4e-05	0.00106736
093 RT-ZI Gnb3 Gaba	Rnf130_Chr11:49927095-49927594	0.606438	0.00068	0.0165904
093 RT-ZI Gnb3 Gaba	Mgat4b_Chr11:49986122-49986621	-16.2964	4e-05	0.00106736
093 RT-ZI Gnb3 Gaba	Gm26542_Chr11:50231275-50231774	-17.7395	4e-05	0.00106736
093 RT-ZI Gnb3 Gaba	Gm26542_Chr11:50359134-50359633	-17.3495	4e-05	0.00106736
093 RT-ZI Gnb3 Gaba	Hnrnph1_Chr11:50364495-50364994	0.552107	0.00416	0.0939215
093 RT-ZI Gnb3 Gaba	Rasgef1c_Chr11:50364495-50364994	-17.0706	4e-05	0.00106736
093 RT-ZI Gnb3 Gaba	Gm26542_Chr11:50371267-50371766	-17.9649	4e-05	0.00106736
093 RT-ZI Gnb3 Gaba	Rasgef1c_Chr11:50371267-50371766	-17.2725	4e-05	0.00106736
093 RT-ZI Gnb3 Gaba	Ivns1abp_Chr1:151078850-151079349	0.872618	0.00424	0.0955999
093 RT-ZI Gnb3 Gaba	Uqcr10_Chr11:5114824-5115323	0.730558	0.00408	0.0922797
093 RT-ZI Gnb3 Gaba	Phykpl_Chr11:51539556-51540055	-17.5773	4e-05	0.00106736
093 RT-ZI Gnb3 Gaba	Rmnd5b_Chr11:51539556-51540055	-16.4407	4e-05	0.00106736
093 RT-ZI Gnb3 Gaba	Phykpl_Chr11:51805116-51805615	-16.5815	4e-05	0.00106736
093 RT-ZI Gnb3 Gaba	Rmnd5b_Chr11:51805116-51805615	-15.4938	4e-05	0.00106736
093 RT-ZI Gnb3 Gaba	Jade2_Chr11:52297264-52297763	-18.0098	4e-05	0.00106736
093 RT-ZI Gnb3 Gaba	Gas2l1_Chr11:5244104-5244603	-16.3977	4e-05	0.00106736
093 RT-ZI Gnb3 Gaba	E330020D12Rik_Chr1:153075954-153076453	-16.1966	4e-05	0.00106736
093 RT-ZI Gnb3 Gaba	E330020D12Rik_Chr1:153243876-153244375	-16.5558	4e-05	0.00106736
093 RT-ZI Gnb3 Gaba	Rgs8_Chr1:153401692-153402191	-16.8331	4e-05	0.00106736
093 RT-ZI Gnb3 Gaba	Kif3a_Chr11:53528798-53529297	0.741296	0.00064	0.0156295
093 RT-ZI Gnb3 Gaba	Slc22a4_Chr11:53528798-53529297	-16.4569	4e-05	0.00106736
093 RT-ZI Gnb3 Gaba	Slc22a5_Chr11:53627821-53628320	-15.9698	4e-05	0.00106736
093 RT-ZI Gnb3 Gaba	P4ha2_Chr11:53735504-53736003	-17.1416	4e-05	0.00106736
093 RT-ZI Gnb3 Gaba	Slc22a4_Chr11:53735504-53736003	-17.3344	4e-05	0.00106736
093 RT-ZI Gnb3 Gaba	E330020D12Rik_Chr1:153751992-153752491	-16.3504	4e-05	0.00106736
093 RT-ZI Gnb3 Gaba	Rgs8_Chr1:153751992-153752491	-16.986	4e-05	0.00106736
093 RT-ZI Gnb3 Gaba	Mrps24_Chr11:5397228-5397727	0.99283	0.00176	0.0417247
093 RT-ZI Gnb3 Gaba	Acsl6_Chr11:54122297-54122796	0.709642	0.00136	0.0324849
093 RT-ZI Gnb3 Gaba	Ccdc117_Chr11:5474109-5474608	-17.3428	4e-05	0.00106736
093 RT-ZI Gnb3 Gaba	Slc36a1_Chr11:54939443-54939942	-17.4654	4e-05	0.00106736
093 RT-ZI Gnb3 Gaba	Sparc_Chr11:55039560-55040059	-15.6613	4e-05	0.00106736
093 RT-ZI Gnb3 Gaba	Stx6_Chr1:155281379-155281878	1.15466	0.00184	0.0435398
093 RT-ZI Gnb3 Gaba	Gpx3_Chr11:55386355-55386854	-16.4786	4e-05	0.00106736
093 RT-ZI Gnb3 Gaba	Qsox1_Chr1:155605448-155605947	-15.5616	4e-05	0.00106736
093 RT-ZI Gnb3 Gaba	Qsox1_Chr1:155784738-155785237	-16.7241	4e-05	0.00106736
093 RT-ZI Gnb3 Gaba	Sparc_Chr11:55918239-55918738	-16.0267	4e-05	0.00106736
093 RT-ZI Gnb3 Gaba	Qsox1_Chr1:156270424-156270923	-15.7064	4e-05	0.00106736
093 RT-ZI Gnb3 Gaba	Soat1_Chr1:156270424-156270923	-17.534	4e-05	0.00106736
093 RT-ZI Gnb3 Gaba	Tor1aip1_Chr1:156270424-156270923	1.4963	0.0012	0.0287784
093 RT-ZI Gnb3 Gaba	Fam163a_Chr1:156271579-156272078	-17.6947	4e-05	0.00106736
093 RT-ZI Gnb3 Gaba	Qsox1_Chr1:156271579-156272078	-15.6156	4e-05	0.00106736
093 RT-ZI Gnb3 Gaba	Tdrd5_Chr1:156271579-156272078	-15.8461	8e-05	0.00205831
093 RT-ZI Gnb3 Gaba	Tor1aip1_Chr1:156271579-156272078	-16.9448	4e-05	0.00106736
093 RT-ZI Gnb3 Gaba	Gria1_Chr11:57474230-57474729	0.637947	0.00048	0.0117932
093 RT-ZI Gnb3 Gaba	Sap30l_Chr11:57475084-57475583	-17.6757	4e-05	0.00106736
093 RT-ZI Gnb3 Gaba	Sap30l_Chr11:57683940-57684439	-17.9916	4e-05	0.00106736
093 RT-ZI Gnb3 Gaba	Mrpl22_Chr11:57708807-57709306	-17.033	4e-05	0.00106736
093 RT-ZI Gnb3 Gaba	Cnot8_Chr11:57760320-57760819	-16.093	4e-05	0.00106736
093 RT-ZI Gnb3 Gaba	Mrpl22_Chr11:57778280-57778779	-17.2795	4e-05	0.00106736
093 RT-ZI Gnb3 Gaba	Cnot8_Chr11:57934216-57934715	-15.7839	4e-05	0.00106736
093 RT-ZI Gnb3 Gaba	Gemin5_Chr11:57934216-57934715	-16.7323	4e-05	0.00106736
093 RT-ZI Gnb3 Gaba	Mrpl22_Chr11:57934216-57934715	-16.8779	4e-05	0.00106736
093 RT-ZI Gnb3 Gaba	Cnot8_Chr11:58179515-58180014	-15.6673	4e-05	0.00106736
093 RT-ZI Gnb3 Gaba	Mrpl22_Chr11:58179515-58180014	-16.6813	4e-05	0.00106736
093 RT-ZI Gnb3 Gaba	Sh3bp5l_Chr11:58225539-58226038	-17.5511	4e-05	0.00106736
093 RT-ZI Gnb3 Gaba	Ccdc117_Chr11:5855846-5856345	-17.8424	4e-05	0.00106736
093 RT-ZI Gnb3 Gaba	Ykt6_Chr11:5855846-5856345	-17.4309	4e-05	0.00106736
093 RT-ZI Gnb3 Gaba	Ccdc117_Chr11:5886126-5886625	-16.5429	4e-05	0.00106736
093 RT-ZI Gnb3 Gaba	Nudcd3_Chr11:5901872-5902371	0.616728	0.00072	0.0175409
093 RT-ZI Gnb3 Gaba	Guk1_Chr11:59238867-59239366	-16.2505	4e-05	0.00106736
093 RT-ZI Gnb3 Gaba	Hist3h2ba_Chr11:59238867-59239366	-16.5224	4e-05	0.00106736
093 RT-ZI Gnb3 Gaba	Gm12258_Chr11:59297883-59298382	-16.3688	4e-05	0.00106736
093 RT-ZI Gnb3 Gaba	Zfp867_Chr11:59297883-59298382	-17.0651	4e-05	0.00106736
093 RT-ZI Gnb3 Gaba	Med9_Chr11:59525139-59525638	-16.7493	4e-05	0.00106736
093 RT-ZI Gnb3 Gaba	Zfp867_Chr11:59525139-59525638	-17.2944	8e-05	0.00205831
093 RT-ZI Gnb3 Gaba	Med9_Chr11:59624160-59624659	-16.4226	4e-05	0.00106736
093 RT-ZI Gnb3 Gaba	Zfp867_Chr11:59624160-59624659	-16.9477	4e-05	0.00106736
093 RT-ZI Gnb3 Gaba	Flcn_Chr11:59708190-59708689	-17.5445	4e-05	0.00106736
093 RT-ZI Gnb3 Gaba	Flcn_Chr11:59879858-59880357	-17.181	4e-05	0.00106736
093 RT-ZI Gnb3 Gaba	Flcn_Chr11:59933798-59934297	-17.1776	4e-05	0.00106736
093 RT-ZI Gnb3 Gaba	Pemt_Chr11:59933798-59934297	-17.158	4e-05	0.00106736
093 RT-ZI Gnb3 Gaba	Pemt_Chr11:60076711-60077210	-17.3088	4e-05	0.00106736
093 RT-ZI Gnb3 Gaba	Alkbh5_Chr11:60088876-60089375	-17.0764	4e-05	0.00106736
093 RT-ZI Gnb3 Gaba	Med9_Chr11:60176558-60177057	-17.9187	4e-05	0.00106736
093 RT-ZI Gnb3 Gaba	Atpaf2_Chr11:60311445-60311944	-16.9679	4e-05	0.00106736
093 RT-ZI Gnb3 Gaba	Drg2_Chr11:60311445-60311944	-16.8471	4e-05	0.00106736
093 RT-ZI Gnb3 Gaba	Srebf1_Chr11:60384584-60385083	-15.9695	4e-05	0.00106736
093 RT-ZI Gnb3 Gaba	Kcnj12_Chr11:60927182-60927681	-17.6535	4e-05	0.00106736
093 RT-ZI Gnb3 Gaba	Map2k3_Chr11:61042487-61042986	-18.0378	4e-05	0.00106736
093 RT-ZI Gnb3 Gaba	Dhrs7b_Chr11:61091592-61092091	-16.572	4e-05	0.00106736
093 RT-ZI Gnb3 Gaba	Map2k3_Chr11:61091592-61092091	-17.6268	4e-05	0.00106736
093 RT-ZI Gnb3 Gaba	Tmem11_Chr11:61091592-61092091	-16.655	4e-05	0.00106736
093 RT-ZI Gnb3 Gaba	Aldh3a2_Chr11:61147169-61147668	-17.4848	4e-05	0.00106736
093 RT-ZI Gnb3 Gaba	B9d1_Chr11:61147169-61147668	-17.2294	4e-05	0.00106736
093 RT-ZI Gnb3 Gaba	Kcnj12_Chr11:61231238-61231737	-16.5308	4e-05	0.00106736
093 RT-ZI Gnb3 Gaba	Kcnj12_Chr11:61417839-61418338	-16.5161	4e-05	0.00106736
093 RT-ZI Gnb3 Gaba	B9d1_Chr11:61727931-61728430	-16.4523	4e-05	0.00106736
093 RT-ZI Gnb3 Gaba	Rnf112_Chr11:61727931-61728430	-16.6923	4e-05	0.00106736
093 RT-ZI Gnb3 Gaba	Nacad_Chr11:6187758-6188257	-17.7926	4e-05	0.00106736
093 RT-ZI Gnb3 Gaba	Gm38304_Chr1:161962919-161963418	-17.4191	4e-05	0.00106736
093 RT-ZI Gnb3 Gaba	Gm38304_Chr1:161976357-161976856	-17.0543	0.00016	0.0040227
093 RT-ZI Gnb3 Gaba	B9d1_Chr11:61998205-61998704	-16.2801	4e-05	0.00106736
093 RT-ZI Gnb3 Gaba	Prpsap2_Chr11:61998205-61998704	-16.596	4e-05	0.00106736
093 RT-ZI Gnb3 Gaba	Gm38304_Chr1:161999984-162000483	-18.8714	8e-05	0.00205831
093 RT-ZI Gnb3 Gaba	Gm38304_Chr1:162109390-162109889	-17.8865	8e-05	0.00205831
093 RT-ZI Gnb3 Gaba	Lrrc75a_Chr11:62258913-62259412	-17.5377	4e-05	0.00106736
093 RT-ZI Gnb3 Gaba	Gm38304_Chr1:162359150-162359649	-18.5198	4e-05	0.00106736
093 RT-ZI Gnb3 Gaba	Pigc_Chr1:162359150-162359649	-15.9541	4e-05	0.00106736
093 RT-ZI Gnb3 Gaba	Lrrc75a_Chr11:62494541-62495040	-17.6463	4e-05	0.00106736
093 RT-ZI Gnb3 Gaba	Pigl_Chr11:62494541-62495040	-17.5134	4e-05	0.00106736
093 RT-ZI Gnb3 Gaba	Zfp286_Chr11:62494541-62495040	-17.0306	4e-05	0.00106736
093 RT-ZI Gnb3 Gaba	Pigl_Chr11:62669237-62669736	-17.4528	4e-05	0.00106736
093 RT-ZI Gnb3 Gaba	Trpv2_Chr11:62669237-62669736	-16.3875	4e-05	0.00106736
093 RT-ZI Gnb3 Gaba	Zfp287_Chr11:62669237-62669736	-16.9446	4e-05	0.00106736
093 RT-ZI Gnb3 Gaba	Tvp23b_Chr11:62675684-62676183	-16.8826	4e-05	0.00106736
093 RT-ZI Gnb3 Gaba	Pigl_Chr11:62693224-62693723	-17.5267	4e-05	0.00106736
093 RT-ZI Gnb3 Gaba	Pigl_Chr11:62744044-62744543	-17.6819	4e-05	0.00106736
093 RT-ZI Gnb3 Gaba	Lrrc75a_Chr11:62745871-62746370	-18.8437	4e-05	0.00106736
093 RT-ZI Gnb3 Gaba	Ttc19_Chr11:62756619-62757118	0.552242	0.00084	0.0204056
093 RT-ZI Gnb3 Gaba	Zfp286_Chr11:62901601-62902100	-16.8682	4e-05	0.00106736
093 RT-ZI Gnb3 Gaba	Zfp287_Chr11:62901601-62902100	-16.8195	4e-05	0.00106736
093 RT-ZI Gnb3 Gaba	Zfp287_Chr11:62938902-62939401	-16.3638	4e-05	0.00106736
093 RT-ZI Gnb3 Gaba	Lrrc75a_Chr11:63132368-63132867	-17.9042	4e-05	0.00106736
093 RT-ZI Gnb3 Gaba	Gorab_Chr1:163150347-163150846	-18.2496	0.00028	0.00695861
093 RT-ZI Gnb3 Gaba	Pmp22_Chr11:63515084-63515583	-16.7306	4e-05	0.00106736
093 RT-ZI Gnb3 Gaba	Scyl3_Chr1:164184456-164184955	-17.2339	4e-05	0.00106736
093 RT-ZI Gnb3 Gaba	Blzf1_Chr1:164316628-164317127	-15.7544	4e-05	0.00106736
093 RT-ZI Gnb3 Gaba	Gm38190_Chr1:165046478-165046977	-17.4864	4e-05	0.00106736
093 RT-ZI Gnb3 Gaba	Gm38190_Chr1:165187149-165187648	-17.3913	4e-05	0.00106736
093 RT-ZI Gnb3 Gaba	Ube2w_Chr1:16518842-16519341	0.606019	0.00032	0.00792937
093 RT-ZI Gnb3 Gaba	Gm38190_Chr1:165583463-165583962	-17.4414	4e-05	0.00106736
093 RT-ZI Gnb3 Gaba	Creg1_Chr1:165610305-165610804	-16.9914	4e-05	0.00106736
093 RT-ZI Gnb3 Gaba	Zkscan6_Chr11:65678773-65679272	-18.2669	4e-05	0.00106736
093 RT-ZI Gnb3 Gaba	Creg1_Chr1:165736007-165736506	-17.0407	4e-05	0.00106736
093 RT-ZI Gnb3 Gaba	Pou2f1_Chr1:165736007-165736506	0.835595	0.00076	0.0184932
093 RT-ZI Gnb3 Gaba	Zkscan6_Chr11:65745628-65746127	-18.5322	0.00012	0.00303964
093 RT-ZI Gnb3 Gaba	Tada1_Chr1:166443385-166443884	-17.7984	4e-05	0.00106736
093 RT-ZI Gnb3 Gaba	Nacad_Chr11:6654805-6655304	-17.5449	4e-05	0.00106736
093 RT-ZI Gnb3 Gaba	Ramp3_Chr11:6654805-6655304	-17.1159	4e-05	0.00106736
093 RT-ZI Gnb3 Gaba	Fam78b_Chr1:167220465-167220964	-16.3385	4e-05	0.00106736
093 RT-ZI Gnb3 Gaba	Tmco1_Chr1:167369831-167370330	1.01548	0.00176	0.0417247
093 RT-ZI Gnb3 Gaba	Uck2_Chr1:167369831-167370330	-17.0035	4e-05	0.00106736
093 RT-ZI Gnb3 Gaba	Aldh9a1_Chr1:167447991-167448490	-16.2399	4e-05	0.00106736
093 RT-ZI Gnb3 Gaba	Uck2_Chr1:167644793-167645292	-17.2089	4e-05	0.00106736
093 RT-ZI Gnb3 Gaba	Borcs6_Chr11:68579279-68579778	-17.6305	4e-05	0.00106736
093 RT-ZI Gnb3 Gaba	Ctc1_Chr11:68623302-68623801	-17.4308	4e-05	0.00106736
093 RT-ZI Gnb3 Gaba	Borcs6_Chr11:68946752-68947251	-17.1145	4e-05	0.00106736
093 RT-ZI Gnb3 Gaba	Kcnab3_Chr11:68946752-68947251	-17.3055	4e-05	0.00106736
093 RT-ZI Gnb3 Gaba	Kdm6b_Chr11:68946752-68947251	1.30146	0.00224	0.0525998
093 RT-ZI Gnb3 Gaba	Borcs6_Chr11:68947440-68947939	-17.1181	4e-05	0.00106736
093 RT-ZI Gnb3 Gaba	Kcnab3_Chr11:68947440-68947939	-17.182	4e-05	0.00106736
093 RT-ZI Gnb3 Gaba	Tmem107_Chr11:68947440-68947939	-16.5224	8e-05	0.00205831
093 RT-ZI Gnb3 Gaba	Ctc1_Chr11:68982584-68983083	-17.1483	4e-05	0.00106736
093 RT-ZI Gnb3 Gaba	Tmem107_Chr11:68982584-68983083	-15.7644	4e-05	0.00106736
093 RT-ZI Gnb3 Gaba	Kcnab3_Chr11:69150351-69150850	-17.976	8e-05	0.00205831
093 RT-ZI Gnb3 Gaba	Sat2_Chr11:69150351-69150850	-16.1081	4e-05	0.00106736
093 RT-ZI Gnb3 Gaba	Arhgef15_Chr11:69266160-69266659	-18.2996	4e-05	0.00106736
093 RT-ZI Gnb3 Gaba	Borcs6_Chr11:69266160-69266659	-17.4034	4e-05	0.00106736
093 RT-ZI Gnb3 Gaba	Rpl26_Chr11:69266160-69266659	0.857127	0.00028	0.00695861
093 RT-ZI Gnb3 Gaba	Senp3_Chr11:69266160-69266659	-16.0336	4e-05	0.00106736
093 RT-ZI Gnb3 Gaba	Chd3_Chr11:69364814-69365313	0.890256	0.00064	0.0156295
093 RT-ZI Gnb3 Gaba	Ctc1_Chr11:69364814-69365313	-17.4456	4e-05	0.00106736
093 RT-ZI Gnb3 Gaba	Mpdu1_Chr11:69364814-69365313	1.22573	0.00072	0.0175409
093 RT-ZI Gnb3 Gaba	Borcs6_Chr11:69390294-69390793	-17.5297	8e-05	0.00205831
093 RT-ZI Gnb3 Gaba	Kcnab3_Chr11:69390294-69390793	-17.6017	4e-05	0.00106736
093 RT-ZI Gnb3 Gaba	Senp3_Chr11:69390294-69390793	-16.0443	4e-05	0.00106736
093 RT-ZI Gnb3 Gaba	Vamp2_Chr11:69390294-69390793	0.732657	0.00044	0.0108393
093 RT-ZI Gnb3 Gaba	Borcs6_Chr11:69513799-69514298	-17.7158	4e-05	0.00106736
093 RT-ZI Gnb3 Gaba	Phf23_Chr11:69513799-69514298	-17.2129	0.00012	0.00303964
093 RT-ZI Gnb3 Gaba	Sat2_Chr11:69513799-69514298	-15.5669	4e-05	0.00106736
093 RT-ZI Gnb3 Gaba	Phf23_Chr11:69546285-69546784	-17.3273	0.00012	0.00303964
093 RT-ZI Gnb3 Gaba	Dvl2_Chr11:69613869-69614368	-16.5999	4e-05	0.00106736
093 RT-ZI Gnb3 Gaba	Kcnab3_Chr11:69613869-69614368	-17.4973	0.00016	0.0040227
093 RT-ZI Gnb3 Gaba	Phf23_Chr11:69613869-69614368	-16.9284	8e-05	0.00205831
093 RT-ZI Gnb3 Gaba	Trp53_Chr11:69613869-69614368	-18.0893	4e-05	0.00106736
093 RT-ZI Gnb3 Gaba	Phf23_Chr11:69802708-69803207	-17.2942	0.00012	0.00303964
093 RT-ZI Gnb3 Gaba	Efnb3_Chr11:69934070-69934569	1.10354	0.00256	0.0596992
093 RT-ZI Gnb3 Gaba	Dvl2_Chr11:70026558-70027057	-17.7724	4e-05	0.00106736
093 RT-ZI Gnb3 Gaba	Phf23_Chr11:70026558-70027057	-17.3387	0.00028	0.00695861
093 RT-ZI Gnb3 Gaba	Sat2_Chr11:70026558-70027057	-17.3204	4e-05	0.00106736
093 RT-ZI Gnb3 Gaba	Dlg4_Chr11:70074615-70075114	1.54224	0.0008	0.0194525
093 RT-ZI Gnb3 Gaba	Fgf11_Chr11:70074615-70075114	-16.2934	4e-05	0.00106736
093 RT-ZI Gnb3 Gaba	Mpdu1_Chr11:70074615-70075114	-16.6255	4e-05	0.00106736
093 RT-ZI Gnb3 Gaba	Senp3_Chr11:70074615-70075114	-16.0096	4e-05	0.00106736
093 RT-ZI Gnb3 Gaba	Rgs4_Chr1:170136265-170136764	-17.8972	4e-05	0.00106736
093 RT-ZI Gnb3 Gaba	Gm9929_Chr1:170502356-170502855	-16.0643	4e-05	0.00106736
093 RT-ZI Gnb3 Gaba	Arrb2_Chr11:70510012-70510511	-17.6502	4e-05	0.00106736
093 RT-ZI Gnb3 Gaba	Pelp1_Chr11:70510012-70510511	-16.7747	4e-05	0.00106736
093 RT-ZI Gnb3 Gaba	Zfp3_Chr11:70510012-70510511	-17.09	4e-05	0.00106736
093 RT-ZI Gnb3 Gaba	Pelp1_Chr11:70520048-70520547	-18.1831	4e-05	0.00106736
093 RT-ZI Gnb3 Gaba	Uap1_Chr1:170632351-170632850	-17.9626	4e-05	0.00106736
093 RT-ZI Gnb3 Gaba	Zfp3_Chr11:70681826-70682325	-17.2758	4e-05	0.00106736
093 RT-ZI Gnb3 Gaba	Zfp3_Chr11:70777141-70777640	-18.0138	4e-05	0.00106736
093 RT-ZI Gnb3 Gaba	Pcp4l1_Chr1:170901502-170902001	-18.3673	4e-05	0.00106736
093 RT-ZI Gnb3 Gaba	B4galt3_Chr1:170908209-170908708	-16.1167	4e-05	0.00106736
093 RT-ZI Gnb3 Gaba	Gm20045_Chr1:170908209-170908708	-17.7648	4e-05	0.00106736
093 RT-ZI Gnb3 Gaba	Dhx33_Chr11:71052429-71052928	-17.8093	4e-05	0.00106736
093 RT-ZI Gnb3 Gaba	Rnf167_Chr11:71052429-71052928	-16.7079	4e-05	0.00106736
093 RT-ZI Gnb3 Gaba	Slc25a11_Chr11:71052429-71052928	-16.1755	4e-05	0.00106736
093 RT-ZI Gnb3 Gaba	Zfp3_Chr11:71052429-71052928	-17.2268	4e-05	0.00106736
093 RT-ZI Gnb3 Gaba	Pcp4l1_Chr1:171118147-171118646	1.59909	0.00352	0.0804757
093 RT-ZI Gnb3 Gaba	Ufc1_Chr1:171118147-171118646	-16.8179	4e-05	0.00106736
093 RT-ZI Gnb3 Gaba	Gm28376_Chr1:17123363-17123862	-18.4235	4e-05	0.00106736
093 RT-ZI Gnb3 Gaba	Gm20045_Chr1:171238390-171238889	-17.1105	4e-05	0.00106736
093 RT-ZI Gnb3 Gaba	Dedd_Chr1:171262958-171263457	-17.8352	4e-05	0.00106736
093 RT-ZI Gnb3 Gaba	C1qbp_Chr11:71406711-71407210	-16.0631	4e-05	0.00106736
093 RT-ZI Gnb3 Gaba	Nup88_Chr11:71406711-71407210	-16.5246	4e-05	0.00106736
093 RT-ZI Gnb3 Gaba	Wscd1_Chr11:71758431-71758930	1.01973	0.002	0.0471059
093 RT-ZI Gnb3 Gaba	Kcnj9_Chr1:172053804-172054303	-16.3013	4e-05	0.00106736
093 RT-ZI Gnb3 Gaba	Vangl2_Chr1:172053804-172054303	-15.7142	4e-05	0.00106736
093 RT-ZI Gnb3 Gaba	Wscd1_Chr11:72233982-72234481	1.02737	0.00192	0.0453059
093 RT-ZI Gnb3 Gaba	4930563E22Rik_Chr11:72343807-72344306	-18.0281	4e-05	0.00106736
093 RT-ZI Gnb3 Gaba	Pex19_Chr1:172357472-172357971	-15.7411	4e-05	0.00106736
093 RT-ZI Gnb3 Gaba	4930563E22Rik_Chr11:72570546-72571045	-17.3916	4e-05	0.00106736
093 RT-ZI Gnb3 Gaba	Ctns_Chr11:73007656-73008155	-16.8229	4e-05	0.00106736
093 RT-ZI Gnb3 Gaba	Ccdc92b_Chr11:74408862-74409361	-17.9212	4e-05	0.00106736
093 RT-ZI Gnb3 Gaba	Ccdc92b_Chr11:74548844-74549343	-18.3958	4e-05	0.00106736
093 RT-ZI Gnb3 Gaba	Ccdc92b_Chr11:74981360-74981859	-17.5713	4e-05	0.00106736
093 RT-ZI Gnb3 Gaba	Rpa1_Chr11:74981360-74981859	-16.7371	4e-05	0.00106736
093 RT-ZI Gnb3 Gaba	Rtn4rl1_Chr11:75139345-75139844	-16.9223	4e-05	0.00106736
093 RT-ZI Gnb3 Gaba	Ywhae_Chr11:75273361-75273860	0.597882	0.0002	0.00500355
093 RT-ZI Gnb3 Gaba	Rpa1_Chr11:75402121-75402620	-17.207	4e-05	0.00106736
093 RT-ZI Gnb3 Gaba	Smyd4_Chr11:75402121-75402620	-17.0225	4e-05	0.00106736
093 RT-ZI Gnb3 Gaba	Serpinf1_Chr11:75845598-75846097	-16.7047	4e-05	0.00106736
093 RT-ZI Gnb3 Gaba	Doc2b_Chr11:75894907-75895406	-16.0485	4e-05	0.00106736
093 RT-ZI Gnb3 Gaba	Myo1c_Chr11:75945728-75946227	-16.9476	4e-05	0.00106736
093 RT-ZI Gnb3 Gaba	Nxn_Chr11:75945728-75946227	-16.6026	4e-05	0.00106736
093 RT-ZI Gnb3 Gaba	Doc2b_Chr11:76147939-76148438	-16.7675	4e-05	0.00106736
093 RT-ZI Gnb3 Gaba	Vps53_Chr11:76260666-76261165	0.956247	0.00208	0.0489561
093 RT-ZI Gnb3 Gaba	Cpd_Chr11:76540912-76541411	1.23513	0.0004	0.0098731
093 RT-ZI Gnb3 Gaba	Nxn_Chr11:76612468-76612967	-17.3869	4e-05	0.00106736
093 RT-ZI Gnb3 Gaba	Nsrp1_Chr11:76622061-76622560	-17.3071	4e-05	0.00106736
093 RT-ZI Gnb3 Gaba	Gosr1_Chr11:76666061-76666560	-16.3837	4e-05	0.00106736
093 RT-ZI Gnb3 Gaba	Ssh2_Chr11:77173659-77174158	0.488094	0.00352	0.0804757
093 RT-ZI Gnb3 Gaba	Dhrs13_Chr11:77624309-77624808	-16.109	4e-05	0.00106736
093 RT-ZI Gnb3 Gaba	Eral1_Chr11:77737194-77737693	-15.6786	4e-05	0.00106736
093 RT-ZI Gnb3 Gaba	Trp53i13_Chr11:77737194-77737693	-16.3555	4e-05	0.00106736
093 RT-ZI Gnb3 Gaba	Ankrd13b_Chr11:77786183-77786682	-16.3279	4e-05	0.00106736
093 RT-ZI Gnb3 Gaba	Eral1_Chr11:77786183-77786682	-17.0328	4e-05	0.00106736
093 RT-ZI Gnb3 Gaba	Coro6_Chr11:77801034-77801533	1.48832	0.00048	0.0117932
093 RT-ZI Gnb3 Gaba	Trp53i13_Chr11:77808087-77808586	-17.7002	4e-05	0.00106736
093 RT-ZI Gnb3 Gaba	Unc119_Chr11:78019636-78020135	-15.7176	4e-05	0.00106736
093 RT-ZI Gnb3 Gaba	Flot2_Chr11:78360462-78360961	0.849285	0.00076	0.0184932
093 RT-ZI Gnb3 Gaba	Tnfaip1_Chr11:78360462-78360961	-16.096	4e-05	0.00106736
093 RT-ZI Gnb3 Gaba	Wsb1_Chr11:78856143-78856642	0.515838	0.00344	0.0787711
093 RT-ZI Gnb3 Gaba	Tnfaip1_Chr11:79030501-79031000	-16.2078	4e-05	0.00106736
093 RT-ZI Gnb3 Gaba	Ccnq_Chr11:79039293-79039792	-15.9168	4e-05	0.00106736
093 RT-ZI Gnb3 Gaba	Ccnq_Chr11:79213833-79214332	-17.0555	4e-05	0.00106736
093 RT-ZI Gnb3 Gaba	Ccnq_Chr11:79224406-79224905	-16.0651	4e-05	0.00106736
093 RT-ZI Gnb3 Gaba	Tfb2m_Chr1:179232010-179232509	-18.0104	4e-05	0.00106736
093 RT-ZI Gnb3 Gaba	Psen2_Chr1:180179713-180180212	-17.6875	4e-05	0.00106736
093 RT-ZI Gnb3 Gaba	Psen2_Chr1:180313754-180314253	-17.0754	4e-05	0.00106736
093 RT-ZI Gnb3 Gaba	Utp6_Chr11:80335562-80336061	-16.8126	4e-05	0.00106736
093 RT-ZI Gnb3 Gaba	Zfp207_Chr11:80335562-80336061	0.528525	0.00424	0.0955999
093 RT-ZI Gnb3 Gaba	5730455P16Rik_Chr11:80351729-80352228	-16.9663	4e-05	0.00106736
093 RT-ZI Gnb3 Gaba	Atad5_Chr11:80351729-80352228	-16.4494	4e-05	0.00106736
093 RT-ZI Gnb3 Gaba	Rhbdl3_Chr11:80351729-80352228	-16.8758	4e-05	0.00106736
093 RT-ZI Gnb3 Gaba	Tmem98_Chr11:80351729-80352228	-15.3648	4e-05	0.00106736
093 RT-ZI Gnb3 Gaba	Crlf3_Chr11:80518968-80519467	-16.2073	4e-05	0.00106736
093 RT-ZI Gnb3 Gaba	Rhbdl3_Chr11:80518968-80519467	-15.6817	4e-05	0.00106736
093 RT-ZI Gnb3 Gaba	Tefm_Chr11:80518968-80519467	-16.5677	4e-05	0.00106736
093 RT-ZI Gnb3 Gaba	Parp1_Chr1:180530625-180531124	-17.0206	4e-05	0.00106736
093 RT-ZI Gnb3 Gaba	Psmd11_Chr11:80818038-80818537	0.71417	0.00016	0.0040227
093 RT-ZI Gnb3 Gaba	5730455P16Rik_Chr11:80852915-80853414	-16.4874	4e-05	0.00106736
093 RT-ZI Gnb3 Gaba	Sde2_Chr1:180863577-180864076	-17.4769	4e-05	0.00106736
093 RT-ZI Gnb3 Gaba	Gm37768_Chr1:180974329-180974828	-17.6293	4e-05	0.00106736
093 RT-ZI Gnb3 Gaba	Sde2_Chr1:180974329-180974828	-17.0912	4e-05	0.00106736
093 RT-ZI Gnb3 Gaba	Ephx1_Chr1:180987731-180988230	-18.2318	0.00032	0.00792937
093 RT-ZI Gnb3 Gaba	Cnih3_Chr1:181016699-181017198	-17.9343	4e-05	0.00106736
093 RT-ZI Gnb3 Gaba	Gm37768_Chr1:181016699-181017198	-17.7137	4e-05	0.00106736
093 RT-ZI Gnb3 Gaba	Pycr2_Chr1:181016699-181017198	-17.393	4e-05	0.00106736
093 RT-ZI Gnb3 Gaba	Cnih3_Chr1:181022160-181022659	-17.0821	4e-05	0.00106736
093 RT-ZI Gnb3 Gaba	Ephx1_Chr1:181022160-181022659	-17.6753	0.00016	0.0040227
093 RT-ZI Gnb3 Gaba	Pycr2_Chr1:181022160-181022659	-17.4734	4e-05	0.00106736
093 RT-ZI Gnb3 Gaba	Sde2_Chr1:181022160-181022659	-16.2995	4e-05	0.00106736
093 RT-ZI Gnb3 Gaba	Sde2_Chr1:181272836-181273335	-16.3233	4e-05	0.00106736
093 RT-ZI Gnb3 Gaba	Gm11418_Chr11:81426570-81427069	-16.7448	4e-05	0.00106736
093 RT-ZI Gnb3 Gaba	Asic2_Chr11:81543042-81543541	0.513701	0.00104	0.0250837
093 RT-ZI Gnb3 Gaba	Trp53bp2_Chr1:182081997-182082496	-16.8731	4e-05	0.00106736
093 RT-ZI Gnb3 Gaba	Trp53bp2_Chr1:182582634-182583133	-16.2596	4e-05	0.00106736
093 RT-ZI Gnb3 Gaba	Taf1a_Chr1:182990836-182991335	-17.4126	4e-05	0.00106736
093 RT-ZI Gnb3 Gaba	Aida_Chr1:183442040-183442539	-17.2319	4e-05	0.00106736
093 RT-ZI Gnb3 Gaba	Brox_Chr1:183442040-183442539	1.53858	0.00024	0.00598212
093 RT-ZI Gnb3 Gaba	Disp1_Chr1:183521444-183521943	-16.649	4e-05	0.00106736
093 RT-ZI Gnb3 Gaba	Ddx52_Chr11:83583099-83583598	-17.7069	4e-05	0.00106736
093 RT-ZI Gnb3 Gaba	Ddx52_Chr11:84136384-84136883	-16.5398	4e-05	0.00106736
093 RT-ZI Gnb3 Gaba	Ddx52_Chr11:84429504-84430003	-16.6074	4e-05	0.00106736
093 RT-ZI Gnb3 Gaba	Myo19_Chr11:84642111-84642610	-17.3686	4e-05	0.00106736
093 RT-ZI Gnb3 Gaba	Lhx1_Chr11:84760754-84761253	-16.998	4e-05	0.00106736
093 RT-ZI Gnb3 Gaba	Lhx1_Chr11:84794429-84794928	-18.4134	4e-05	0.00106736
093 RT-ZI Gnb3 Gaba	Myo19_Chr11:84797872-84798371	-17.2	4e-05	0.00106736
093 RT-ZI Gnb3 Gaba	Gm38251_Chr1:185117648-185118147	-16.2618	4e-05	0.00106736
093 RT-ZI Gnb3 Gaba	Gm38251_Chr1:185164390-185164889	-16.9686	0.00012	0.00303964
093 RT-ZI Gnb3 Gaba	Iars2_Chr1:185164390-185164889	-16.743	4e-05	0.00106736
093 RT-ZI Gnb3 Gaba	Gm38251_Chr1:185209671-185210170	-16.4431	4e-05	0.00106736
093 RT-ZI Gnb3 Gaba	Bpnt1_Chr1:185269036-185269535	-17.6445	4e-05	0.00106736
093 RT-ZI Gnb3 Gaba	Dhx40_Chr11:86876392-86876891	1.34079	0.00112	0.0269619
093 RT-ZI Gnb3 Gaba	Dhx40_Chr11:86894088-86894587	-16.1021	4e-05	0.00106736
093 RT-ZI Gnb3 Gaba	Tubd1_Chr11:86894088-86894587	-17.4957	4e-05	0.00106736
093 RT-ZI Gnb3 Gaba	Rps6kb1_Chr11:86898296-86898795	0.598099	0.00248	0.0579269
093 RT-ZI Gnb3 Gaba	Tubd1_Chr11:87002319-87002818	-17.8114	4e-05	0.00106736
093 RT-ZI Gnb3 Gaba	Ppm1e_Chr11:87448016-87448515	0.483652	0.00288	0.0665796
093 RT-ZI Gnb3 Gaba	Hsf5_Chr11:87639119-87639618	-16.6353	4e-05	0.00106736
093 RT-ZI Gnb3 Gaba	Gm15892_Chr11:87770899-87771398	-17.9449	4e-05	0.00106736
093 RT-ZI Gnb3 Gaba	Gm15892_Chr11:88197008-88197507	-17.318	4e-05	0.00106736
093 RT-ZI Gnb3 Gaba	Supt4a_Chr11:88197008-88197507	-16.6718	4e-05	0.00106736
093 RT-ZI Gnb3 Gaba	Vezf1_Chr11:88197008-88197507	-16.4259	4e-05	0.00106736
093 RT-ZI Gnb3 Gaba	Akap1_Chr11:88394690-88395189	-15.7791	4e-05	0.00106736
093 RT-ZI Gnb3 Gaba	Gm15892_Chr11:88489882-88490381	-17.6039	4e-05	0.00106736
093 RT-ZI Gnb3 Gaba	4930556N13Rik_Chr11:88654938-88655437	-16.9962	0.00012	0.00303964
093 RT-ZI Gnb3 Gaba	Scpep1_Chr11:88654938-88655437	-16.0778	4e-05	0.00106736
093 RT-ZI Gnb3 Gaba	4930556N13Rik_Chr11:88664527-88665026	-17.4218	4e-05	0.00106736
093 RT-ZI Gnb3 Gaba	Scpep1_Chr11:88664527-88665026	-15.9836	4e-05	0.00106736
093 RT-ZI Gnb3 Gaba	Scpep1_Chr11:88728403-88728902	-15.6773	4e-05	0.00106736
093 RT-ZI Gnb3 Gaba	Scpep1_Chr11:88822970-88823469	-15.7336	4e-05	0.00106736
093 RT-ZI Gnb3 Gaba	Prox1os_Chr1:189883733-189884232	-17.9165	4e-05	0.00106736
093 RT-ZI Gnb3 Gaba	Hlf_Chr11:90169917-90170416	-16.5684	4e-05	0.00106736
093 RT-ZI Gnb3 Gaba	Cox11_Chr11:90548437-90548936	-16.8259	4e-05	0.00106736
093 RT-ZI Gnb3 Gaba	Hlf_Chr11:90697306-90697805	-16.6548	4e-05	0.00106736
093 RT-ZI Gnb3 Gaba	Pacc1_Chr1:190918882-190919381	-16.9429	4e-05	0.00106736
093 RT-ZI Gnb3 Gaba	Pacc1_Chr1:191299461-191299960	-16.9718	4e-05	0.00106736
093 RT-ZI Gnb3 Gaba	Tatdn3_Chr1:191382302-191382801	-16.3	4e-05	0.00106736
093 RT-ZI Gnb3 Gaba	Slc30a1_Chr1:191787257-191787756	-17.165	0.00016	0.0040227
093 RT-ZI Gnb3 Gaba	Traf5_Chr1:191834737-191835236	-17.1362	4e-05	0.00106736
093 RT-ZI Gnb3 Gaba	Utp25_Chr1:193376677-193377176	-15.8172	4e-05	0.00106736
093 RT-ZI Gnb3 Gaba	Nme1_Chr11:93471758-93472257	0.810482	0.00304	0.0699911
093 RT-ZI Gnb3 Gaba	Rsad1_Chr11:94340160-94340659	-16.6769	4e-05	0.00106736
093 RT-ZI Gnb3 Gaba	Pdk2_Chr11:94716781-94717280	-16.6141	4e-05	0.00106736
093 RT-ZI Gnb3 Gaba	Ppp1r9b_Chr11:94917169-94917668	-17.2008	4e-05	0.00106736
093 RT-ZI Gnb3 Gaba	Pdk2_Chr11:94928708-94929207	-17.5202	4e-05	0.00106736
093 RT-ZI Gnb3 Gaba	Ppp1r9b_Chr11:94928708-94929207	-16.8398	4e-05	0.00106736
093 RT-ZI Gnb3 Gaba	Rsad1_Chr11:94928708-94929207	-15.6281	4e-05	0.00106736
093 RT-ZI Gnb3 Gaba	Cr1l_Chr1:194962097-194962596	-16.4879	4e-05	0.00106736
093 RT-ZI Gnb3 Gaba	Mrpl27_Chr11:94970163-94970662	1.22951	0.00128	0.0306101
093 RT-ZI Gnb3 Gaba	Pdk2_Chr11:94970163-94970662	-17.2893	4e-05	0.00106736
093 RT-ZI Gnb3 Gaba	Spop_Chr11:95001063-95001562	0.56835	0.0024	0.0561877
093 RT-ZI Gnb3 Gaba	Pdk2_Chr11:95046901-95047400	-17.1185	4e-05	0.00106736
093 RT-ZI Gnb3 Gaba	Spop_Chr11:95046901-95047400	0.693794	0.0016	0.0380204
093 RT-ZI Gnb3 Gaba	Itga3_Chr11:95106820-95107319	-16.4706	4e-05	0.00106736
093 RT-ZI Gnb3 Gaba	Lrrc59_Chr11:95116874-95117373	-15.6486	4e-05	0.00106736
093 RT-ZI Gnb3 Gaba	Itga3_Chr11:95520648-95521147	-17.2948	4e-05	0.00106736
093 RT-ZI Gnb3 Gaba	Ube2z_Chr11:95633401-95633900	-16.7782	4e-05	0.00106736
093 RT-ZI Gnb3 Gaba	Slc35b1_Chr11:95875651-95876150	0.966956	0.00432	0.0972307
093 RT-ZI Gnb3 Gaba	Cdk5rap3_Chr11:96456430-96456929	-18.2066	4e-05	0.00106736
093 RT-ZI Gnb3 Gaba	Snx11_Chr11:96456430-96456929	-16.6581	4e-05	0.00106736
093 RT-ZI Gnb3 Gaba	Mrpl45_Chr11:96867074-96867573	-16.6718	4e-05	0.00106736
093 RT-ZI Gnb3 Gaba	Osbpl7_Chr11:96885606-96886105	-17.6843	4e-05	0.00106736
093 RT-ZI Gnb3 Gaba	Mrpl45_Chr11:96909936-96910435	-16.8377	4e-05	0.00106736
093 RT-ZI Gnb3 Gaba	Cbx1_Chr11:96997353-96997852	0.849926	0.00368	0.0839444
093 RT-ZI Gnb3 Gaba	Cwc25_Chr11:97289759-97290258	-16.4011	4e-05	0.00106736
093 RT-ZI Gnb3 Gaba	Mrpl10_Chr11:97289759-97290258	-17.2636	4e-05	0.00106736
093 RT-ZI Gnb3 Gaba	Pcgf2_Chr11:97289759-97290258	-16.3219	4e-05	0.00106736
093 RT-ZI Gnb3 Gaba	Cisd3_Chr11:97328075-97328574	-16.9096	4e-05	0.00106736
093 RT-ZI Gnb3 Gaba	Cwc25_Chr11:97418601-97419100	-17.414	4e-05	0.00106736
093 RT-ZI Gnb3 Gaba	Osbpl7_Chr11:97434990-97435489	-17.6063	4e-05	0.00106736
093 RT-ZI Gnb3 Gaba	Cwc25_Chr11:97489495-97489994	-17.4658	4e-05	0.00106736
093 RT-ZI Gnb3 Gaba	Cisd3_Chr11:97523696-97524195	-17.2044	4e-05	0.00106736
093 RT-ZI Gnb3 Gaba	Cwc25_Chr11:97523696-97524195	-17.5853	4e-05	0.00106736
093 RT-ZI Gnb3 Gaba	Cacnb1_Chr11:97619262-97619761	-17.6717	4e-05	0.00106736
093 RT-ZI Gnb3 Gaba	Cwc25_Chr11:97619262-97619761	-17.5174	8e-05	0.00205831
093 RT-ZI Gnb3 Gaba	Cwc25_Chr11:97631874-97632373	-16.4905	4e-05	0.00106736
093 RT-ZI Gnb3 Gaba	Mrpl45_Chr11:97631874-97632373	-16.7012	4e-05	0.00106736
093 RT-ZI Gnb3 Gaba	Pcgf2_Chr11:97631874-97632373	-15.7304	4e-05	0.00106736
093 RT-ZI Gnb3 Gaba	Cacnb1_Chr11:97899766-97900265	-17.5077	4e-05	0.00106736
093 RT-ZI Gnb3 Gaba	Cisd3_Chr11:97899766-97900265	-16.0878	4e-05	0.00106736
093 RT-ZI Gnb3 Gaba	B230217C12Rik_Chr11:97947357-97947856	-16.1527	4e-05	0.00106736
093 RT-ZI Gnb3 Gaba	Cacnb1_Chr11:97947357-97947856	-16.0312	4e-05	0.00106736
093 RT-ZI Gnb3 Gaba	Pcgf2_Chr11:97947357-97947856	-15.9929	4e-05	0.00106736
093 RT-ZI Gnb3 Gaba	Cacnb1_Chr11:97958871-97959370	-17.5176	8e-05	0.00205831
093 RT-ZI Gnb3 Gaba	Cwc25_Chr11:97958871-97959370	-17.2913	4e-05	0.00106736
093 RT-ZI Gnb3 Gaba	Lasp1_Chr11:97958871-97959370	-16.1271	4e-05	0.00106736
093 RT-ZI Gnb3 Gaba	Pcgf2_Chr11:97958871-97959370	-16.0762	4e-05	0.00106736
093 RT-ZI Gnb3 Gaba	Stard3_Chr11:97958871-97959370	-15.9085	4e-05	0.00106736
093 RT-ZI Gnb3 Gaba	Cisd3_Chr11:98002561-98003060	-16.3018	4e-05	0.00106736
093 RT-ZI Gnb3 Gaba	Cwc25_Chr11:98002561-98003060	-17.4724	4e-05	0.00106736
093 RT-ZI Gnb3 Gaba	Lasp1_Chr11:98002561-98003060	-16.9127	4e-05	0.00106736
093 RT-ZI Gnb3 Gaba	Plxdc1_Chr11:98035819-98036318	-17.3697	0.00016	0.0040227
093 RT-ZI Gnb3 Gaba	Pcgf2_Chr11:98075328-98075827	-17.5371	4e-05	0.00106736
093 RT-ZI Gnb3 Gaba	Cacnb1_Chr11:98457613-98458112	-17.3191	0.00032	0.00792937
093 RT-ZI Gnb3 Gaba	Cacnb1_Chr11:98488595-98489094	-17.7893	0.0002	0.00500355
093 RT-ZI Gnb3 Gaba	Ormdl3_Chr11:98488595-98489094	-16.8055	4e-05	0.00106736
093 RT-ZI Gnb3 Gaba	Igfbp4_Chr11:98710330-98710829	-15.8006	4e-05	0.00106736
093 RT-ZI Gnb3 Gaba	Psmd3_Chr11:98710330-98710829	-16.1938	4e-05	0.00106736
093 RT-ZI Gnb3 Gaba	Stard3_Chr11:98710330-98710829	-15.7104	4e-05	0.00106736
093 RT-ZI Gnb3 Gaba	Mien1_Chr11:98721381-98721880	-17.4287	4e-05	0.00106736
093 RT-ZI Gnb3 Gaba	Med24_Chr11:98788748-98789247	1.2384	0.00152	0.0361788
093 RT-ZI Gnb3 Gaba	Igfbp4_Chr11:98829284-98829783	-16.0611	4e-05	0.00106736
093 RT-ZI Gnb3 Gaba	Krt10_Chr11:98981550-98982049	-16.4933	4e-05	0.00106736
093 RT-ZI Gnb3 Gaba	Krt10_Chr11:99142421-99142920	-16.2056	4e-05	0.00106736
093 RT-ZI Gnb3 Gaba	Gm48383_Chr12:100065001-100065500	-16.9979	4e-05	0.00106736
093 RT-ZI Gnb3 Gaba	Nrde2_Chr12:100106185-100106684	-18.4215	4e-05	0.00106736
093 RT-ZI Gnb3 Gaba	Gm48383_Chr12:100131646-100132145	-17.5685	4e-05	0.00106736
093 RT-ZI Gnb3 Gaba	Gm48383_Chr12:100252050-100252549	-17.4364	8e-05	0.00205831
093 RT-ZI Gnb3 Gaba	Nrde2_Chr12:100311052-100311551	-18.8733	4e-05	0.00106736
093 RT-ZI Gnb3 Gaba	Gpr68_Chr12:100492245-100492744	-17.1993	4e-05	0.00106736
093 RT-ZI Gnb3 Gaba	Nrde2_Chr12:100492245-100492744	-17.1074	4e-05	0.00106736
093 RT-ZI Gnb3 Gaba	Gm48383_Chr12:100841191-100841690	-17.3844	4e-05	0.00106736
093 RT-ZI Gnb3 Gaba	Gm48383_Chr12:100935988-100936487	-18.1121	4e-05	0.00106736
093 RT-ZI Gnb3 Gaba	Gm48383_Chr12:100952071-100952570	-17.6642	4e-05	0.00106736
093 RT-ZI Gnb3 Gaba	Ccdc88c_Chr12:100988255-100988754	-17.7106	4e-05	0.00106736
093 RT-ZI Gnb3 Gaba	Ppp4r4_Chr12:103995211-103995710	1.02457	0.00232	0.0544027
093 RT-ZI Gnb3 Gaba	Glrx5_Chr12:104636934-104637433	-16.5187	4e-05	0.00106736
093 RT-ZI Gnb3 Gaba	Snhg10_Chr12:104837067-104837566	-17.837	4e-05	0.00106736
093 RT-ZI Gnb3 Gaba	Snhg10_Chr12:105102870-105103369	-16.5076	4e-05	0.00106736
093 RT-ZI Gnb3 Gaba	Glrx5_Chr12:105103945-105104444	-16.7241	4e-05	0.00106736
093 RT-ZI Gnb3 Gaba	Snhg10_Chr12:105103945-105104444	-16.6772	4e-05	0.00106736
093 RT-ZI Gnb3 Gaba	Gskip_Chr12:105427288-105427787	-16.3614	4e-05	0.00106736
093 RT-ZI Gnb3 Gaba	Snhg10_Chr12:105526757-105527256	-16.3684	4e-05	0.00106736
093 RT-ZI Gnb3 Gaba	Vrk1_Chr12:106474431-106474930	-16.1704	4e-05	0.00106736
093 RT-ZI Gnb3 Gaba	Slc25a47_Chr12:108395945-108396444	-18.2692	0.0004	0.0098731
093 RT-ZI Gnb3 Gaba	Slc25a47_Chr12:108410581-108411080	-17.8451	4e-05	0.00106736
093 RT-ZI Gnb3 Gaba	Ccnk_Chr12:108540972-108541471	-16.0919	4e-05	0.00106736
093 RT-ZI Gnb3 Gaba	Slc25a47_Chr12:108540972-108541471	-18.01	0.00048	0.0117932
093 RT-ZI Gnb3 Gaba	Wars_Chr12:108540972-108541471	-17.7244	4e-05	0.00106736
093 RT-ZI Gnb3 Gaba	Wdr25_Chr12:108540972-108541471	-17.2133	4e-05	0.00106736
093 RT-ZI Gnb3 Gaba	Wars_Chr12:108605516-108606015	-17.5972	4e-05	0.00106736
093 RT-ZI Gnb3 Gaba	Slc25a47_Chr12:108915893-108916392	-18.3254	0.0002	0.00500355
093 RT-ZI Gnb3 Gaba	Rtl1_Chr12:109394293-109394792	-16.7566	4e-05	0.00106736
093 RT-ZI Gnb3 Gaba	Cinp_Chr12:110398323-110398822	-17.7895	4e-05	0.00106736
093 RT-ZI Gnb3 Gaba	Cinp_Chr12:110429997-110430496	-17.7149	4e-05	0.00106736
093 RT-ZI Gnb3 Gaba	A230087F16Rik_Chr12:110936179-110936678	-17.4271	4e-05	0.00106736
093 RT-ZI Gnb3 Gaba	Amn_Chr12:110991964-110992463	-17.7344	4e-05	0.00106736
093 RT-ZI Gnb3 Gaba	2810029C07Rik_Chr12:111142756-111143255	-17.352	4e-05	0.00106736
093 RT-ZI Gnb3 Gaba	2810029C07Rik_Chr12:111164405-111164904	-17.7249	4e-05	0.00106736
093 RT-ZI Gnb3 Gaba	A230087F16Rik_Chr12:111164405-111164904	-17.5114	4e-05	0.00106736
093 RT-ZI Gnb3 Gaba	Xrcc3_Chr12:111413239-111413738	-16.5289	4e-05	0.00106736
093 RT-ZI Gnb3 Gaba	A230087F16Rik_Chr12:111459389-111459888	-17.0688	4e-05	0.00106736
093 RT-ZI Gnb3 Gaba	2810029C07Rik_Chr12:111559542-111560041	-16.3123	4e-05	0.00106736
093 RT-ZI Gnb3 Gaba	4930595D18Rik_Chr12:111559542-111560041	-17.6402	4e-05	0.00106736
093 RT-ZI Gnb3 Gaba	A230087F16Rik_Chr12:111559542-111560041	-16.2674	4e-05	0.00106736
093 RT-ZI Gnb3 Gaba	Xrcc3_Chr12:111559542-111560041	-15.3377	4e-05	0.00106736
093 RT-ZI Gnb3 Gaba	A230087F16Rik_Chr12:111648210-111648709	-17.3708	4e-05	0.00106736
093 RT-ZI Gnb3 Gaba	Bag5_Chr12:111738662-111739161	-16.649	4e-05	0.00106736
093 RT-ZI Gnb3 Gaba	Kif26a_Chr12:111738662-111739161	-16.1686	4e-05	0.00106736
093 RT-ZI Gnb3 Gaba	Xrcc3_Chr12:111738662-111739161	-15.3221	4e-05	0.00106736
093 RT-ZI Gnb3 Gaba	Xrcc3_Chr12:111745974-111746473	-16.3513	0.00012	0.00303964
093 RT-ZI Gnb3 Gaba	Kif26a_Chr12:111848116-111848615	-16.6894	4e-05	0.00106736
093 RT-ZI Gnb3 Gaba	2810029C07Rik_Chr12:111958087-111958586	-17.5069	4e-05	0.00106736
093 RT-ZI Gnb3 Gaba	2810029C07Rik_Chr12:111977156-111977655	-16.4258	4e-05	0.00106736
093 RT-ZI Gnb3 Gaba	Kif26a_Chr12:111977156-111977655	-16.4994	4e-05	0.00106736
093 RT-ZI Gnb3 Gaba	2810029C07Rik_Chr12:111986474-111986973	-16.0883	4e-05	0.00106736
093 RT-ZI Gnb3 Gaba	Bag5_Chr12:112001047-112001546	-16.7079	4e-05	0.00106736
093 RT-ZI Gnb3 Gaba	Eif5_Chr12:112001047-112001546	0.785291	0.00092	0.0222796
093 RT-ZI Gnb3 Gaba	Xrcc3_Chr12:112001047-112001546	-15.2885	4e-05	0.00106736
093 RT-ZI Gnb3 Gaba	Ckb_Chr12:112025863-112026362	0.456157	0.00408	0.0922797
093 RT-ZI Gnb3 Gaba	Xrcc3_Chr12:112025863-112026362	-15.425	4e-05	0.00106736
093 RT-ZI Gnb3 Gaba	Bag5_Chr12:112113654-112114153	-16.7978	4e-05	0.00106736
093 RT-ZI Gnb3 Gaba	Inf2_Chr12:112214447-112214946	-16.8539	4e-05	0.00106736
093 RT-ZI Gnb3 Gaba	Kif26a_Chr12:112329568-112330067	-17.5833	4e-05	0.00106736
093 RT-ZI Gnb3 Gaba	Kif26a_Chr12:112473671-112474170	-16.8343	4e-05	0.00106736
093 RT-ZI Gnb3 Gaba	Nudt14_Chr12:112510928-112511427	-17.7456	4e-05	0.00106736
093 RT-ZI Gnb3 Gaba	Nudt14_Chr12:112542865-112543364	-17.547	4e-05	0.00106736
093 RT-ZI Gnb3 Gaba	Nudt14_Chr12:112551744-112552243	-17.4299	4e-05	0.00106736
093 RT-ZI Gnb3 Gaba	Kif26a_Chr12:112623698-112624197	-17.4422	4e-05	0.00106736
093 RT-ZI Gnb3 Gaba	Tmem121_Chr12:112693407-112693906	1.41321	0.001	0.024188
093 RT-ZI Gnb3 Gaba	Akt1_Chr12:112746598-112747097	-16.7902	4e-05	0.00106736
093 RT-ZI Gnb3 Gaba	Btbd6_Chr12:112955752-112956251	-18.1863	4e-05	0.00106736
093 RT-ZI Gnb3 Gaba	Nudt14_Chr12:113041497-113041996	-17.8537	4e-05	0.00106736
093 RT-ZI Gnb3 Gaba	Akt1_Chr12:113119373-113119872	-16.7597	4e-05	0.00106736
093 RT-ZI Gnb3 Gaba	Nudt14_Chr12:113215871-113216370	-16.5211	4e-05	0.00106736
093 RT-ZI Gnb3 Gaba	Nudt14_Chr12:113222680-113223179	-16.5853	4e-05	0.00106736
093 RT-ZI Gnb3 Gaba	Sp8_Chr12:118457706-118458205	-17.1209	4e-05	0.00106736
093 RT-ZI Gnb3 Gaba	Sp8_Chr12:118836661-118837160	-17.2829	4e-05	0.00106736
093 RT-ZI Gnb3 Gaba	Nbas_Chr12:12809975-12810474	0.44452	0.00088	0.0213517
093 RT-ZI Gnb3 Gaba	E2f6_Chr12:16533153-16533652	-17.3023	4e-05	0.00106736
093 RT-ZI Gnb3 Gaba	E2f6_Chr12:17252992-17253491	-17.6219	4e-05	0.00106736
093 RT-ZI Gnb3 Gaba	Odc1_Chr12:17397018-17397517	-15.9697	4e-05	0.00106736
093 RT-ZI Gnb3 Gaba	Itgb1bp1_Chr12:21097640-21098139	-17.803	4e-05	0.00106736
093 RT-ZI Gnb3 Gaba	Adam17_Chr12:21443733-21444232	-16.4451	4e-05	0.00106736
093 RT-ZI Gnb3 Gaba	Iah1_Chr12:21542986-21543485	1.30845	0.0044	0.0988776
093 RT-ZI Gnb3 Gaba	2900060N12Rik_Chr12:24581838-24582337	-16.8663	4e-05	0.00106736
093 RT-ZI Gnb3 Gaba	Cmpk2_Chr12:26360778-26361277	-15.4236	4e-05	0.00106736
093 RT-ZI Gnb3 Gaba	Cmpk2_Chr12:26620806-26621305	-16.3696	8e-05	0.00205831
093 RT-ZI Gnb3 Gaba	Cmpk2_Chr12:26903415-26903914	-17.0935	4e-05	0.00106736
093 RT-ZI Gnb3 Gaba	Gm9866_Chr12:27082615-27083114	1.02717	0.0012	0.0287784
093 RT-ZI Gnb3 Gaba	Rnaseh1_Chr12:28838186-28838685	-17.7186	4e-05	0.00106736
093 RT-ZI Gnb3 Gaba	Rnaseh1_Chr12:28872188-28872687	-17.8859	4e-05	0.00106736
093 RT-ZI Gnb3 Gaba	Rnaseh1_Chr12:29050803-29051302	-17.7943	4e-05	0.00106736
093 RT-ZI Gnb3 Gaba	Rnaseh1_Chr12:29128777-29129276	-18.0392	4e-05	0.00106736
093 RT-ZI Gnb3 Gaba	Myt1l_Chr12:29279537-29280036	0.33025	0.00432	0.0972307
093 RT-ZI Gnb3 Gaba	Myt1l_Chr12:29368266-29368765	-0.340201	0.00312	0.0717352
093 RT-ZI Gnb3 Gaba	Dus4l_Chr12:31895820-31896319	-16.0209	4e-05	0.00106736
093 RT-ZI Gnb3 Gaba	4933406C10Rik_Chr12:33027036-33027535	-16.9312	4e-05	0.00106736
093 RT-ZI Gnb3 Gaba	4933406C10Rik_Chr12:33109472-33109971	-16.4691	4e-05	0.00106736
093 RT-ZI Gnb3 Gaba	4933406C10Rik_Chr12:33224906-33225405	-16.4302	4e-05	0.00106736
093 RT-ZI Gnb3 Gaba	4933406C10Rik_Chr12:33314002-33314501	-16.6055	4e-05	0.00106736
093 RT-ZI Gnb3 Gaba	Fam135a_Chr1:23705447-23705946	0.656029	0.00304	0.0699911
093 RT-ZI Gnb3 Gaba	Ptrhd1_Chr12:3770451-3770950	-17.2723	4e-05	0.00106736
093 RT-ZI Gnb3 Gaba	Ptrhd1_Chr12:3781425-3781924	-17.0088	4e-05	0.00106736
093 RT-ZI Gnb3 Gaba	Ptrhd1_Chr12:3928747-3929246	-17.4011	4e-05	0.00106736
093 RT-ZI Gnb3 Gaba	Zfp277_Chr12:40837510-40838009	-17.563	4e-05	0.00106736
093 RT-ZI Gnb3 Gaba	Sdhaf4_Chr1:24218998-24219497	-16.096	4e-05	0.00106736
093 RT-ZI Gnb3 Gaba	Col19a1_Chr1:24249028-24249527	-17.1126	4e-05	0.00106736
093 RT-ZI Gnb3 Gaba	2810032G03Rik_Chr12:4953059-4953558	-17.2913	4e-05	0.00106736
093 RT-ZI Gnb3 Gaba	Wdcp_Chr12:4953059-4953558	-16.8688	4e-05	0.00106736
093 RT-ZI Gnb3 Gaba	Fkbp1b_Chr12:5144101-5144600	-17.2046	4e-05	0.00106736
093 RT-ZI Gnb3 Gaba	Dtd2_Chr12:51728893-51729392	-17.868	4e-05	0.00106736
093 RT-ZI Gnb3 Gaba	Nubpl_Chr12:51728893-51729392	-17.5714	4e-05	0.00106736
093 RT-ZI Gnb3 Gaba	Fam228a_Chr12:5173923-5174422	-17.7778	4e-05	0.00106736
093 RT-ZI Gnb3 Gaba	2810032G03Rik_Chr12:5179408-5179907	-17.2458	4e-05	0.00106736
093 RT-ZI Gnb3 Gaba	Wdcp_Chr12:5179408-5179907	-16.6877	4e-05	0.00106736
093 RT-ZI Gnb3 Gaba	Ubxn2a_Chr12:5215721-5216220	-16.7555	4e-05	0.00106736
093 RT-ZI Gnb3 Gaba	Nubpl_Chr12:52346504-52347003	-17.1725	4e-05	0.00106736
093 RT-ZI Gnb3 Gaba	Npas3_Chr12:52783021-52783520	0.529705	0.0024	0.0561877
093 RT-ZI Gnb3 Gaba	Gm32442_Chr12:5428696-5429195	1.04958	0.00048	0.0117932
093 RT-ZI Gnb3 Gaba	Srp54a_Chr12:54834720-54835219	-19.0098	0.00012	0.00303964
093 RT-ZI Gnb3 Gaba	Srp54a_Chr12:55343929-55344428	-17.8179	4e-05	0.00106736
093 RT-ZI Gnb3 Gaba	2810032G03Rik_Chr12:5743461-5743960	1.625	0.00104	0.0250837
093 RT-ZI Gnb3 Gaba	Klhl28_Chr12:64672060-64672559	-17.2148	4e-05	0.00106736
093 RT-ZI Gnb3 Gaba	Fancm_Chr12:65349503-65350002	-16.81	4e-05	0.00106736
093 RT-ZI Gnb3 Gaba	Fancm_Chr12:65401918-65402417	-17.6917	4e-05	0.00106736
093 RT-ZI Gnb3 Gaba	9330151L19Rik_Chr12:68882080-68882579	-15.7512	4e-05	0.00106736
093 RT-ZI Gnb3 Gaba	Arf6_Chr12:68882080-68882579	-17.1311	4e-05	0.00106736
093 RT-ZI Gnb3 Gaba	Mgat2_Chr12:68882080-68882579	-16.9554	4e-05	0.00106736
093 RT-ZI Gnb3 Gaba	Mgat2_Chr12:69458259-69458758	-17.8875	4e-05	0.00106736
093 RT-ZI Gnb3 Gaba	Vcpkmt_Chr12:69458259-69458758	-15.4548	8e-05	0.00205831
093 RT-ZI Gnb3 Gaba	Arf6_Chr12:69574431-69574930	-17.0807	4e-05	0.00106736
093 RT-ZI Gnb3 Gaba	Vcpkmt_Chr12:69574431-69574930	-16.491	4e-05	0.00106736
093 RT-ZI Gnb3 Gaba	Arf6_Chr12:69751936-69752435	-17.6599	4e-05	0.00106736
093 RT-ZI Gnb3 Gaba	Arf6_Chr12:69767202-69767701	-17.5801	4e-05	0.00106736
093 RT-ZI Gnb3 Gaba	Tmx1_Chr12:70192198-70192697	0.997622	0.00044	0.0108393
093 RT-ZI Gnb3 Gaba	4930512B01Rik_Chr12:70207869-70208368	-16.0871	4e-05	0.00106736
093 RT-ZI Gnb3 Gaba	Gm48747_Chr12:70234911-70235410	-15.9975	4e-05	0.00106736
093 RT-ZI Gnb3 Gaba	Gm40437_Chr12:70430458-70430957	-17.564	4e-05	0.00106736
093 RT-ZI Gnb3 Gaba	3110056K07Rik_Chr12:70707366-70707865	-17.2172	4e-05	0.00106736
093 RT-ZI Gnb3 Gaba	Arid4a_Chr12:70910134-70910633	0.822392	0.0044	0.0988776
093 RT-ZI Gnb3 Gaba	Gm40437_Chr12:71197636-71198135	-17.2225	4e-05	0.00106736
093 RT-ZI Gnb3 Gaba	L3hypdh_Chr12:71807210-71807709	-17.8245	4e-05	0.00106736
093 RT-ZI Gnb3 Gaba	Gpr135_Chr12:71898137-71898636	-16.3858	4e-05	0.00106736
093 RT-ZI Gnb3 Gaba	L3hypdh_Chr12:71898137-71898636	-16.5639	4e-05	0.00106736
093 RT-ZI Gnb3 Gaba	L3hypdh_Chr12:72285232-72285731	-17.4381	4e-05	0.00106736
093 RT-ZI Gnb3 Gaba	Gpr135_Chr12:72389622-72390121	-16.1921	4e-05	0.00106736
093 RT-ZI Gnb3 Gaba	L3hypdh_Chr12:72389622-72390121	-16.5507	4e-05	0.00106736
093 RT-ZI Gnb3 Gaba	L3hypdh_Chr12:72461430-72461929	-17.1998	4e-05	0.00106736
093 RT-ZI Gnb3 Gaba	Gm15283_Chr12:74303283-74303782	-16.7016	4e-05	0.00106736
093 RT-ZI Gnb3 Gaba	Zbtb1_Chr12:76081613-76082112	-17.826	4e-05	0.00106736
093 RT-ZI Gnb3 Gaba	Zbtb25_Chr12:76496232-76496731	-16.5403	4e-05	0.00106736
093 RT-ZI Gnb3 Gaba	Zbtb1_Chr12:76533287-76533786	-18.8798	8e-05	0.00205831
093 RT-ZI Gnb3 Gaba	Churc1_Chr12:76649983-76650482	-17.1417	4e-05	0.00106736
093 RT-ZI Gnb3 Gaba	Zbtb1_Chr12:76649983-76650482	-18.1704	4e-05	0.00106736
093 RT-ZI Gnb3 Gaba	Gm48226_Chr12:78057130-78057629	-15.725	4e-05	0.00106736
093 RT-ZI Gnb3 Gaba	Zfyve26_Chr12:78918182-78918681	-16.7608	4e-05	0.00106736
093 RT-ZI Gnb3 Gaba	Plekhh1_Chr12:78919234-78919733	-16.6735	4e-05	0.00106736
093 RT-ZI Gnb3 Gaba	Tmem229b_Chr12:78919234-78919733	-17.3198	4e-05	0.00106736
093 RT-ZI Gnb3 Gaba	Tmem229b_Chr12:79022789-79023288	-17.4165	4e-05	0.00106736
093 RT-ZI Gnb3 Gaba	Plekhh1_Chr12:79035296-79035795	1.54044	0.00088	0.0213517
093 RT-ZI Gnb3 Gaba	Plekhh1_Chr12:79432721-79433220	-15.5745	4e-05	0.00106736
093 RT-ZI Gnb3 Gaba	Rdh11_Chr12:79432721-79433220	-16.9138	4e-05	0.00106736
093 RT-ZI Gnb3 Gaba	Tmem229b_Chr12:79432721-79433220	-16.9468	4e-05	0.00106736
093 RT-ZI Gnb3 Gaba	2310015A10Rik_Chr12:80146403-80146902	-15.9779	4e-05	0.00106736
093 RT-ZI Gnb3 Gaba	2310015A10Rik_Chr12:80574781-80575280	-17.6199	4e-05	0.00106736
093 RT-ZI Gnb3 Gaba	Plekhd1_Chr12:80574781-80575280	-17.0784	4e-05	0.00106736
093 RT-ZI Gnb3 Gaba	Plekhd1_Chr12:80673106-80673605	-17.0832	4e-05	0.00106736
093 RT-ZI Gnb3 Gaba	Smoc1_Chr12:80673106-80673605	-16.9692	4e-05	0.00106736
093 RT-ZI Gnb3 Gaba	Plekhd1_Chr12:80730476-80730975	-17.4574	4e-05	0.00106736
093 RT-ZI Gnb3 Gaba	Smoc1_Chr12:80736566-80737065	-17.3097	4e-05	0.00106736
093 RT-ZI Gnb3 Gaba	6530401F13Rik_Chr12:81140850-81141349	-16.1776	4e-05	0.00106736
093 RT-ZI Gnb3 Gaba	6530401F13Rik_Chr12:81241696-81242195	-15.9337	4e-05	0.00106736
093 RT-ZI Gnb3 Gaba	Smoc1_Chr12:81241696-81242195	-17.1375	4e-05	0.00106736
093 RT-ZI Gnb3 Gaba	Map3k9_Chr12:82080223-82080722	-15.8746	4e-05	0.00106736
093 RT-ZI Gnb3 Gaba	Hs1bp3_Chr12:8320022-8320521	-17.5131	4e-05	0.00106736
093 RT-ZI Gnb3 Gaba	Zfyve1_Chr12:83277708-83278207	1.02121	0.0012	0.0287784
093 RT-ZI Gnb3 Gaba	Abcd4_Chr12:84192871-84193370	-17.8421	4e-05	0.00106736
093 RT-ZI Gnb3 Gaba	Aldh6a1_Chr12:84653864-84654363	-16.6988	4e-05	0.00106736
093 RT-ZI Gnb3 Gaba	Coq6_Chr12:84653864-84654363	-17.088	4e-05	0.00106736
093 RT-ZI Gnb3 Gaba	Abcd4_Chr12:84752664-84753163	-16.9759	4e-05	0.00106736
093 RT-ZI Gnb3 Gaba	Coq6_Chr12:84752664-84753163	-17.3794	4e-05	0.00106736
093 RT-ZI Gnb3 Gaba	Fcf1_Chr12:84752664-84753163	-17.6249	4e-05	0.00106736
093 RT-ZI Gnb3 Gaba	Prox2_Chr12:84752664-84753163	-17.0899	4e-05	0.00106736
093 RT-ZI Gnb3 Gaba	Coq6_Chr12:84784419-84784918	-17.2241	4e-05	0.00106736
093 RT-ZI Gnb3 Gaba	Fam161b_Chr12:84784419-84784918	-16.5851	4e-05	0.00106736
093 RT-ZI Gnb3 Gaba	Mlh3_Chr12:84784419-84784918	-15.9647	4e-05	0.00106736
093 RT-ZI Gnb3 Gaba	Prox2_Chr12:84784419-84784918	-17.0981	4e-05	0.00106736
093 RT-ZI Gnb3 Gaba	Ptgr2_Chr12:84784419-84784918	-16.2593	4e-05	0.00106736
093 RT-ZI Gnb3 Gaba	Jdp2_Chr12:85305403-85305902	-17.6558	4e-05	0.00106736
093 RT-ZI Gnb3 Gaba	Nek9_Chr12:85346294-85346793	-16.053	4e-05	0.00106736
093 RT-ZI Gnb3 Gaba	Prox2_Chr12:85346294-85346793	-16.0386	4e-05	0.00106736
093 RT-ZI Gnb3 Gaba	Prox2_Chr12:85471991-85472490	-17.7495	4e-05	0.00106736
093 RT-ZI Gnb3 Gaba	Prox2_Chr12:85524374-85524873	-18.5076	4e-05	0.00106736
093 RT-ZI Gnb3 Gaba	Acyp1_Chr12:85729305-85729804	-15.9246	4e-05	0.00106736
093 RT-ZI Gnb3 Gaba	Irf2bpl_Chr12:86509585-86510084	-16.8329	4e-05	0.00106736
093 RT-ZI Gnb3 Gaba	Irf2bpl_Chr12:86652532-86653031	-16.6268	4e-05	0.00106736
093 RT-ZI Gnb3 Gaba	Irf2bpl_Chr12:86715344-86715843	-16.031	4e-05	0.00106736
093 RT-ZI Gnb3 Gaba	Irf2bpl_Chr12:86768926-86769425	-17.5997	4e-05	0.00106736
093 RT-ZI Gnb3 Gaba	Irf2bpl_Chr12:86795760-86796259	-16.3276	4e-05	0.00106736
093 RT-ZI Gnb3 Gaba	Irf2bpl_Chr12:86816089-86816588	-17.4523	4e-05	0.00106736
093 RT-ZI Gnb3 Gaba	Tmed8_Chr12:86859671-86860170	-16.8127	4e-05	0.00106736
093 RT-ZI Gnb3 Gaba	Cipc_Chr12:86867558-86868057	0.96489	0.00304	0.0699911
093 RT-ZI Gnb3 Gaba	Irf2bpl_Chr12:86867558-86868057	-16.4797	4e-05	0.00106736
093 RT-ZI Gnb3 Gaba	Irf2bpl_Chr12:87107503-87108002	-16.5262	4e-05	0.00106736
093 RT-ZI Gnb3 Gaba	Zdhhc22_Chr12:87107503-87108002	-16.3964	4e-05	0.00106736
093 RT-ZI Gnb3 Gaba	Ptpn21_Chr12:98668351-98668850	-15.5353	4e-05	0.00106736
093 RT-ZI Gnb3 Gaba	Gm19951_Chr12:99391824-99392323	-17.6575	4e-05	0.00106736
093 RT-ZI Gnb3 Gaba	Nrde2_Chr12:99917713-99918212	-18.5241	4e-05	0.00106736
093 RT-ZI Gnb3 Gaba	Nrde2_Chr12:99959168-99959667	-18.2085	4e-05	0.00106736
093 RT-ZI Gnb3 Gaba	Gm48383_Chr12:99965501-99966000	-17.9368	4e-05	0.00106736
093 RT-ZI Gnb3 Gaba	Pik3r1_Chr13:101373448-101373947	0.985052	0.00232	0.0544027
093 RT-ZI Gnb3 Gaba	Erbin_Chr13:104031989-104032488	0.728026	0.00084	0.0204056
093 RT-ZI Gnb3 Gaba	Trim23_Chr13:104139507-104140006	-17.4204	4e-05	0.00106736
093 RT-ZI Gnb3 Gaba	Sgtb_Chr13:104610369-104610868	-16.1699	4e-05	0.00106736
093 RT-ZI Gnb3 Gaba	Srek1ip1_Chr13:104789627-104790126	-17.4724	4e-05	0.00106736
093 RT-ZI Gnb3 Gaba	Smim15_Chr13:107831061-107831560	-17.7159	0.00012	0.00303964
093 RT-ZI Gnb3 Gaba	Mier3_Chr13:112100548-112101047	-16.7612	4e-05	0.00106736
093 RT-ZI Gnb3 Gaba	Il6st_Chr13:112259322-112259821	-16.1754	4e-05	0.00106736
093 RT-ZI Gnb3 Gaba	Nim1k_Chr13:119741466-119741965	-17.1127	4e-05	0.00106736
093 RT-ZI Gnb3 Gaba	Paip1_Chr13:119741466-119741965	-17.2326	4e-05	0.00106736
093 RT-ZI Gnb3 Gaba	Gm48027_Chr13:13889360-13889859	-16.8687	4e-05	0.00106736
093 RT-ZI Gnb3 Gaba	Mplkip_Chr13:17837469-17837968	-16.3903	4e-05	0.00106736
093 RT-ZI Gnb3 Gaba	Mplkip_Chr13:17983150-17983649	-16.4774	4e-05	0.00106736
093 RT-ZI Gnb3 Gaba	Amph_Chr13:18868148-18868647	0.467046	0.00128	0.0306101
093 RT-ZI Gnb3 Gaba	Gm32036_Chr13:20038370-20038869	-17.7855	8e-05	0.00205831
093 RT-ZI Gnb3 Gaba	Elmo1_Chr13:20206980-20207479	0.896644	0.00032	0.00792937
093 RT-ZI Gnb3 Gaba	Gm32036_Chr13:20900333-20900832	-16.9661	4e-05	0.00106736
093 RT-ZI Gnb3 Gaba	Trim27_Chr13:20900333-20900832	-17.7567	4e-05	0.00106736
093 RT-ZI Gnb3 Gaba	Zkscan8_Chr13:21253367-21253866	-16.9666	4e-05	0.00106736
093 RT-ZI Gnb3 Gaba	Hist1h1c_Chr13:23270295-23270794	-15.9985	4e-05	0.00106736
093 RT-ZI Gnb3 Gaba	Hist1h1c_Chr13:23412749-23413248	-15.7668	4e-05	0.00106736
093 RT-ZI Gnb3 Gaba	Hist1h2be_Chr13:23412749-23413248	-15.4791	4e-05	0.00106736
093 RT-ZI Gnb3 Gaba	Hist1h4d_Chr13:23412749-23413248	-17.842	8e-05	0.00205831
093 RT-ZI Gnb3 Gaba	Hist1h2be_Chr13:23432454-23432953	-18.3045	0.00016	0.0040227
093 RT-ZI Gnb3 Gaba	Hist1h1c_Chr13:23437879-23438378	-16.8838	4e-05	0.00106736
093 RT-ZI Gnb3 Gaba	Hist1h2be_Chr13:23555930-23556429	-16.583	4e-05	0.00106736
093 RT-ZI Gnb3 Gaba	Tdp2_Chr13:24521384-24521883	-16.3805	4e-05	0.00106736
093 RT-ZI Gnb3 Gaba	9330162012Rik_Chr13:24687258-24687757	-17.6448	4e-05	0.00106736
093 RT-ZI Gnb3 Gaba	Tdp2_Chr13:24713497-24713996	-17.8334	4e-05	0.00106736
093 RT-ZI Gnb3 Gaba	9330162012Rik_Chr13:25007139-25007638	-17.6882	4e-05	0.00106736
093 RT-ZI Gnb3 Gaba	9330162012Rik_Chr13:25187259-25187758	-17.3359	8e-05	0.00205831
093 RT-ZI Gnb3 Gaba	9330162012Rik_Chr13:25261662-25262161	-17.0714	4e-05	0.00106736
093 RT-ZI Gnb3 Gaba	Sox4_Chr13:29081755-29082254	-15.5969	4e-05	0.00106736
093 RT-ZI Gnb3 Gaba	Wrnip1_Chr13:32681024-32681523	-17.6311	4e-05	0.00106736
093 RT-ZI Gnb3 Gaba	Wrnip1_Chr13:33085570-33086069	-17.7615	4e-05	0.00106736
093 RT-ZI Gnb3 Gaba	Ripk1_Chr13:34046315-34046814	-17.1812	4e-05	0.00106736
093 RT-ZI Gnb3 Gaba	Serpinb6a_Chr13:34046315-34046814	0.940642	0.00384	0.0872799
093 RT-ZI Gnb3 Gaba	Nqo2_Chr13:34088963-34089462	-17.6415	4e-05	0.00106736
093 RT-ZI Gnb3 Gaba	Nqo2_Chr13:34095983-34096482	-16.9358	4e-05	0.00106736
093 RT-ZI Gnb3 Gaba	Psmg4_Chr13:34095983-34096482	-17.1831	4e-05	0.00106736
093 RT-ZI Gnb3 Gaba	Psmg4_Chr13:34575847-34576346	-18.1444	0.00012	0.00303964
093 RT-ZI Gnb3 Gaba	Gm36839_Chr13:34635891-34636390	-15.5723	4e-05	0.00106736
093 RT-ZI Gnb3 Gaba	Gm36839_Chr13:34699580-34700079	-15.5438	4e-05	0.00106736
093 RT-ZI Gnb3 Gaba	Txndc5_Chr13:38918203-38918702	-15.6844	4e-05	0.00106736
093 RT-ZI Gnb3 Gaba	Imp4_Chr1:34088778-34089277	-17.0369	4e-05	0.00106736
093 RT-ZI Gnb3 Gaba	Nedd9_Chr13:41627200-41627699	-17.6858	4e-05	0.00106736
093 RT-ZI Gnb3 Gaba	Hivep1_Chr13:41779606-41780105	-16.7345	4e-05	0.00106736
093 RT-ZI Gnb3 Gaba	Nedd9_Chr13:41779606-41780105	-17.2339	4e-05	0.00106736
093 RT-ZI Gnb3 Gaba	Tbc1d7_Chr13:42725860-42726359	-17.5599	4e-05	0.00106736
093 RT-ZI Gnb3 Gaba	Sirt5_Chr13:43131727-43132226	-16.6126	4e-05	0.00106736
093 RT-ZI Gnb3 Gaba	Sirt5_Chr13:43182810-43183309	-16.9	4e-05	0.00106736
093 RT-ZI Gnb3 Gaba	Nol7_Chr13:43201048-43201547	1.37097	0.0028	0.0648781
093 RT-ZI Gnb3 Gaba	Sirt5_Chr13:43201048-43201547	-15.8166	4e-05	0.00106736
093 RT-ZI Gnb3 Gaba	Sirt5_Chr13:43214996-43215495	-16.7885	4e-05	0.00106736
093 RT-ZI Gnb3 Gaba	Sirt5_Chr13:43525676-43526175	-15.5558	4e-05	0.00106736
093 RT-ZI Gnb3 Gaba	Sirt5_Chr13:43531125-43531624	-15.6657	4e-05	0.00106736
093 RT-ZI Gnb3 Gaba	Sirt5_Chr13:43565264-43565763	-16.9516	4e-05	0.00106736
093 RT-ZI Gnb3 Gaba	Imp4_Chr1:34399373-34399872	-16.6125	4e-05	0.00106736
093 RT-ZI Gnb3 Gaba	Imp4_Chr1:34602274-34602773	-16.6678	4e-05	0.00106736
093 RT-ZI Gnb3 Gaba	Plekhb2_Chr1:34602274-34602773	0.880566	0.00264	0.0614376
093 RT-ZI Gnb3 Gaba	Fam8a1_Chr13:46368386-46368885	-16.6331	4e-05	0.00106736
093 RT-ZI Gnb3 Gaba	Rbm24_Chr13:46548514-46549013	-16.232	4e-05	0.00106736
093 RT-ZI Gnb3 Gaba	Dek_Chr13:47193616-47194115	0.89061	0.00192	0.0453059
093 RT-ZI Gnb3 Gaba	Kdm1b_Chr13:47209097-47209596	-17.2416	4e-05	0.00106736
093 RT-ZI Gnb3 Gaba	Rnf144b_Chr13:47209097-47209596	1.82713	0.00016	0.0040227
093 RT-ZI Gnb3 Gaba	Phf2os1_Chr13:48797988-48798487	-17.0765	0.00016	0.0040227
093 RT-ZI Gnb3 Gaba	Imp4_Chr1:34891576-34892075	-17.3027	4e-05	0.00106736
093 RT-ZI Gnb3 Gaba	Bicd2_Chr13:49028757-49029256	-16.2497	4e-05	0.00106736
093 RT-ZI Gnb3 Gaba	Phf2os1_Chr13:49028757-49029256	-16.7791	4e-05	0.00106736
093 RT-ZI Gnb3 Gaba	Nol8_Chr13:49162151-49162650	-18.1422	4e-05	0.00106736
093 RT-ZI Gnb3 Gaba	Nol8_Chr13:49169732-49170231	-17.7417	4e-05	0.00106736
093 RT-ZI Gnb3 Gaba	Nol8_Chr13:49178719-49179218	-17.4002	4e-05	0.00106736
093 RT-ZI Gnb3 Gaba	Phf2os1_Chr13:49178719-49179218	-16.2389	4e-05	0.00106736
093 RT-ZI Gnb3 Gaba	Cenpp_Chr13:49307384-49307883	-17.069	4e-05	0.00106736
093 RT-ZI Gnb3 Gaba	Spin1_Chr13:51594716-51595215	-16.2757	4e-05	0.00106736
093 RT-ZI Gnb3 Gaba	Diras2_Chr13:52891894-52892393	-16.6569	4e-05	0.00106736
093 RT-ZI Gnb3 Gaba	Sfxn1_Chr13:53634475-53634974	-16.7954	4e-05	0.00106736
093 RT-ZI Gnb3 Gaba	Hrh2_Chr13:54155852-54156351	-16.9904	4e-05	0.00106736
093 RT-ZI Gnb3 Gaba	Ddx41_Chr13:55178500-55178999	-16.4172	4e-05	0.00106736
093 RT-ZI Gnb3 Gaba	B4galt7_Chr13:55483531-55484030	-16.9679	4e-05	0.00106736
093 RT-ZI Gnb3 Gaba	Dbn1_Chr13:55963180-55963679	-16.7665	4e-05	0.00106736
093 RT-ZI Gnb3 Gaba	Fbxl21_Chr13:56197389-56197888	-16.7685	4e-05	0.00106736
093 RT-ZI Gnb3 Gaba	Fbxl21_Chr13:56554318-56554817	-15.6685	4e-05	0.00106736
093 RT-ZI Gnb3 Gaba	Smad5_Chr13:56554318-56554817	-16.1523	4e-05	0.00106736
093 RT-ZI Gnb3 Gaba	Trpc7_Chr13:57259793-57260292	-17.3947	4e-05	0.00106736
093 RT-ZI Gnb3 Gaba	Gm47423_Chr13:58547469-58547968	-17.5944	4e-05	0.00106736
093 RT-ZI Gnb3 Gaba	Hnrnpk_Chr13:58589357-58589856	1.04399	0.00028	0.00695861
093 RT-ZI Gnb3 Gaba	Gm47423_Chr13:58996530-58997029	-17.805	4e-05	0.00106736
093 RT-ZI Gnb3 Gaba	Isca1_Chr13:59386734-59387233	1.54383	0.00248	0.0579269
093 RT-ZI Gnb3 Gaba	Tut7_Chr13:59401979-59402478	1.01213	0.0012	0.0287784
093 RT-ZI Gnb3 Gaba	Cnnm4_Chr1:36252730-36253229	-16.1053	4e-05	0.00106736
093 RT-ZI Gnb3 Gaba	Gm5141_Chr13:62653020-62653519	-17.6289	4e-05	0.00106736
093 RT-ZI Gnb3 Gaba	Cnnm4_Chr1:36303232-36303731	-17.323	4e-05	0.00106736
093 RT-ZI Gnb3 Gaba	Gm5141_Chr13:63043820-63044319	-17.5793	4e-05	0.00106736
093 RT-ZI Gnb3 Gaba	Klf6_Chr13:6330283-6330782	-17.1649	4e-05	0.00106736
093 RT-ZI Gnb3 Gaba	1810034E14Rik_Chr13:63901135-63901634	-17.336	4e-05	0.00106736
093 RT-ZI Gnb3 Gaba	Fancc_Chr13:63901662-63902161	-16.0966	4e-05	0.00106736
093 RT-ZI Gnb3 Gaba	Cnnm4_Chr1:36401403-36401902	-16.5298	4e-05	0.00106736
093 RT-ZI Gnb3 Gaba	1810034E14Rik_Chr13:64306047-64306546	-17.8065	4e-05	0.00106736
093 RT-ZI Gnb3 Gaba	Ankrd39_Chr1:36633922-36634421	-17.4439	4e-05	0.00106736
093 RT-ZI Gnb3 Gaba	Cnnm3_Chr1:36633922-36634421	0.939928	0.00344	0.0787711
093 RT-ZI Gnb3 Gaba	Cnnm4_Chr1:36633922-36634421	-17.2838	4e-05	0.00106736
093 RT-ZI Gnb3 Gaba	Cnnm4_Chr1:36737222-36737721	-15.9849	4e-05	0.00106736
093 RT-ZI Gnb3 Gaba	Zfp748_Chr13:67683369-67683868	-17.5758	0.00048	0.0117932
093 RT-ZI Gnb3 Gaba	Gm10037_Chr13:67844075-67844574	-17.5196	4e-05	0.00106736
093 RT-ZI Gnb3 Gaba	Nsun2_Chr13:69487893-69488392	-16.4224	4e-05	0.00106736
093 RT-ZI Gnb3 Gaba	Tent4a_Chr13:69509496-69509995	-17.0122	4e-05	0.00106736
093 RT-ZI Gnb3 Gaba	Med10_Chr13:69696241-69696740	-17.4336	4e-05	0.00106736
093 RT-ZI Gnb3 Gaba	Med10_Chr13:70234336-70234835	-17.4872	4e-05	0.00106736
093 RT-ZI Gnb3 Gaba	Adamts16_Chr13:70643612-70644111	-17.6258	4e-05	0.00106736
093 RT-ZI Gnb3 Gaba	Tert_Chr13:73160163-73160662	-18.0331	4e-05	0.00106736
093 RT-ZI Gnb3 Gaba	Tert_Chr13:73513175-73513674	-17.4034	4e-05	0.00106736
093 RT-ZI Gnb3 Gaba	Tert_Chr13:73970434-73970933	-17.7225	4e-05	0.00106736
093 RT-ZI Gnb3 Gaba	Gm46430_Chr13:74259502-74260001	-16.9542	4e-05	0.00106736
093 RT-ZI Gnb3 Gaba	Ell2_Chr13:75227574-75228073	-15.9762	4e-05	0.00106736
093 RT-ZI Gnb3 Gaba	2010300C02Rik_Chr1:37709766-37710265	-16.1576	4e-05	0.00106736
093 RT-ZI Gnb3 Gaba	Mitd1_Chr1:37709766-37710265	-15.5657	4e-05	0.00106736
093 RT-ZI Gnb3 Gaba	Tsga10_Chr1:37959466-37959965	-16.3599	4e-05	0.00106736
093 RT-ZI Gnb3 Gaba	Tbc1d8_Chr1:39007157-39007656	-17.1171	4e-05	0.00106736
093 RT-ZI Gnb3 Gaba	4833422C13Rik_Chr13:91882018-91882517	-17.3782	4e-05	0.00106736
093 RT-ZI Gnb3 Gaba	Mtx3_Chr13:92912505-92913004	-15.9037	4e-05	0.00106736
093 RT-ZI Gnb3 Gaba	Mtx3_Chr13:92986664-92987163	-15.7132	4e-05	0.00106736
093 RT-ZI Gnb3 Gaba	Tbc1d8_Chr1:39440033-39440532	-16.2894	4e-05	0.00106736
093 RT-ZI Gnb3 Gaba	Wdr41_Chr13:94559923-94560422	1.12287	0.00192	0.0453059
093 RT-ZI Gnb3 Gaba	F2r_Chr13:95286926-95287425	-17.6424	4e-05	0.00106736
093 RT-ZI Gnb3 Gaba	F2r_Chr13:95655247-95655746	-16.9401	4e-05	0.00106736
093 RT-ZI Gnb3 Gaba	Iqgap2_Chr13:95655247-95655746	-16.5898	4e-05	0.00106736
093 RT-ZI Gnb3 Gaba	F2r_Chr13:95719818-95720317	-17.8066	8e-05	0.00205831
093 RT-ZI Gnb3 Gaba	Aggf1_Chr13:95822852-95823351	-17.2583	4e-05	0.00106736
093 RT-ZI Gnb3 Gaba	Iqgap2_Chr13:95822852-95823351	-16.413	4e-05	0.00106736
093 RT-ZI Gnb3 Gaba	Zbed3_Chr13:95822852-95823351	-16.4955	4e-05	0.00106736
093 RT-ZI Gnb3 Gaba	F2r_Chr13:95869413-95869912	-17.6017	8e-05	0.00205831
093 RT-ZI Gnb3 Gaba	Poc5_Chr13:95973338-95973837	-17.3809	4e-05	0.00106736
093 RT-ZI Gnb3 Gaba	F2r_Chr13:95995249-95995748	-16.9412	4e-05	0.00106736
093 RT-ZI Gnb3 Gaba	Poc5_Chr13:95995249-95995748	-17.4406	4e-05	0.00106736
093 RT-ZI Gnb3 Gaba	Iqgap2_Chr13:96375469-96375968	-16.7336	4e-05	0.00106736
093 RT-ZI Gnb3 Gaba	Utp15_Chr13:97959237-97959736	-16.7737	4e-05	0.00106736
093 RT-ZI Gnb3 Gaba	Arhgef28_Chr13:98062168-98062667	1.60428	0.0012	0.0287784
093 RT-ZI Gnb3 Gaba	Utp15_Chr13:98062168-98062667	-16.7711	4e-05	0.00106736
093 RT-ZI Gnb3 Gaba	Arhgef28_Chr13:98427639-98428138	-16.3205	4e-05	0.00106736
093 RT-ZI Gnb3 Gaba	Utp15_Chr13:98427639-98428138	-16.3097	4e-05	0.00106736
093 RT-ZI Gnb3 Gaba	Gm16894_Chr1:39856690-39857189	-16.992	4e-05	0.00106736
093 RT-ZI Gnb3 Gaba	Utp15_Chr13:98726391-98726890	-16.3103	4e-05	0.00106736
093 RT-ZI Gnb3 Gaba	Gm16894_Chr1:39936397-39936896	-17.1063	4e-05	0.00106736
093 RT-ZI Gnb3 Gaba	Ptcd2_Chr13:99541601-99542100	-16.7012	4e-05	0.00106736
093 RT-ZI Gnb3 Gaba	Ptcd2_Chr13:99562203-99562702	-17.2661	4e-05	0.00106736
093 RT-ZI Gnb3 Gaba	Ptcd2_Chr13:99723157-99723656	-16.3117	4e-05	0.00106736
093 RT-ZI Gnb3 Gaba	Creg2_Chr1:40000865-40001364	-17.412	4e-05	0.00106736
093 RT-ZI Gnb3 Gaba	6330576A10Rik_Chr14:100416640-100417139	-15.8127	4e-05	0.00106736
093 RT-ZI Gnb3 Gaba	6330576A10Rik_Chr14:100750012-100750511	-17.3005	4e-05	0.00106736
093 RT-ZI Gnb3 Gaba	Tbc1d4_Chr14:101379284-101379783	-16.379	4e-05	0.00106736
093 RT-ZI Gnb3 Gaba	Tbc1d4_Chr14:101787812-101788311	-16.3552	4e-05	0.00106736
093 RT-ZI Gnb3 Gaba	Itgbl1_Chr14:123291295-123291794	-17.5378	4e-05	0.00106736
093 RT-ZI Gnb3 Gaba	Saysd1_Chr14:19706345-19706844	-15.8866	4e-05	0.00106736
093 RT-ZI Gnb3 Gaba	1810062O18Rik_Chr14:20258391-20258890	-17.9226	4e-05	0.00106736
093 RT-ZI Gnb3 Gaba	Chchd1_Chr14:20258391-20258890	-15.513	4e-05	0.00106736
093 RT-ZI Gnb3 Gaba	Fut11_Chr14:20258391-20258890	-17.7823	4e-05	0.00106736
093 RT-ZI Gnb3 Gaba	Gm30054_Chr14:20576066-20576565	-16.6459	4e-05	0.00106736
093 RT-ZI Gnb3 Gaba	Ndst2_Chr14:20576066-20576565	-17.0829	4e-05	0.00106736
093 RT-ZI Gnb3 Gaba	Fut11_Chr14:20724028-20724527	-17.4684	4e-05	0.00106736
093 RT-ZI Gnb3 Gaba	Ndst2_Chr14:20724028-20724527	-17.0372	4e-05	0.00106736
093 RT-ZI Gnb3 Gaba	Ndst2_Chr14:20765835-20766334	-17.1207	4e-05	0.00106736
093 RT-ZI Gnb3 Gaba	Ndst2_Chr14:20803473-20803972	-17.8095	4e-05	0.00106736
093 RT-ZI Gnb3 Gaba	Ndst2_Chr14:21018896-21019395	-17.3711	4e-05	0.00106736
093 RT-ZI Gnb3 Gaba	AC163638.2_Chr14:23783140-23783639	-17.2297	4e-05	0.00106736
093 RT-ZI Gnb3 Gaba	AC163638.2_Chr14:23885484-23885983	-17.1334	4e-05	0.00106736
093 RT-ZI Gnb3 Gaba	AC163638.2_Chr14:24004874-24005373	-18.3042	4e-05	0.00106736
093 RT-ZI Gnb3 Gaba	Dlg5_Chr14:24144324-24144823	0.829995	0.00076	0.0184932
093 RT-ZI Gnb3 Gaba	AC163638.2_Chr14:24181900-24182399	-17.3419	4e-05	0.00106736
093 RT-ZI Gnb3 Gaba	AC163638.2_Chr14:24232633-24233132	-16.536	4e-05	0.00106736
093 RT-ZI Gnb3 Gaba	AC163638.2_Chr14:24551064-24551563	-17.2114	4e-05	0.00106736
093 RT-ZI Gnb3 Gaba	AC163638.2_Chr14:24579313-24579812	-17.0095	4e-05	0.00106736
093 RT-ZI Gnb3 Gaba	Zmiz1os1_Chr14:25565629-25566128	-17.0718	4e-05	0.00106736
093 RT-ZI Gnb3 Gaba	Arhgef3_Chr14:27050765-27051264	-15.8225	4e-05	0.00106736
093 RT-ZI Gnb3 Gaba	AI597479_Chr1:42718477-42718976	-16.6231	8e-05	0.00205831
093 RT-ZI Gnb3 Gaba	Gm28175_Chr1:42718477-42718976	-16.0655	4e-05	0.00106736
093 RT-ZI Gnb3 Gaba	Tgfbrap1_Chr1:42718477-42718976	-17.6245	4e-05	0.00106736
093 RT-ZI Gnb3 Gaba	Arhgef3_Chr14:27596196-27596695	-15.486	4e-05	0.00106736
093 RT-ZI Gnb3 Gaba	Gm45645_Chr14:27596196-27596695	-16.6384	4e-05	0.00106736
093 RT-ZI Gnb3 Gaba	Gm45645_Chr14:27695728-27696227	-18.3671	4e-05	0.00106736
093 RT-ZI Gnb3 Gaba	Wnt5a_Chr14:28450467-28450966	-16.3578	4e-05	0.00106736
093 RT-ZI Gnb3 Gaba	Gm20646_Chr1:42888882-42889381	-15.6917	4e-05	0.00106736
093 RT-ZI Gnb3 Gaba	Gm48006_Chr14:29090010-29090509	-17.2709	4e-05	0.00106736
093 RT-ZI Gnb3 Gaba	Gm48006_Chr14:29410850-29411349	-17.5936	4e-05	0.00106736
093 RT-ZI Gnb3 Gaba	Gm48006_Chr14:29425141-29425640	-18.1426	4e-05	0.00106736
093 RT-ZI Gnb3 Gaba	Gm48006_Chr14:29707435-29707934	-17.3461	4e-05	0.00106736
093 RT-ZI Gnb3 Gaba	Ncoa4_Chr14:31681210-31681709	-17.3836	4e-05	0.00106736
093 RT-ZI Gnb3 Gaba	Dph3_Chr14:31790731-31791230	-16.2346	4e-05	0.00106736
093 RT-ZI Gnb3 Gaba	Ncoa4_Chr14:31794403-31794902	-17.7365	4e-05	0.00106736
093 RT-ZI Gnb3 Gaba	Ncoa4_Chr14:32309775-32310274	-18.3958	4e-05	0.00106736
093 RT-ZI Gnb3 Gaba	Mapk8_Chr14:33205342-33205841	0.606414	0.00272	0.0631543
093 RT-ZI Gnb3 Gaba	Arhgap22_Chr14:33322515-33323014	-16.7548	4e-05	0.00106736
093 RT-ZI Gnb3 Gaba	Arhgap22_Chr14:33656113-33656612	-16.5461	4e-05	0.00106736
093 RT-ZI Gnb3 Gaba	Sncg_Chr14:33959303-33959802	-17.895	4e-05	0.00106736
093 RT-ZI Gnb3 Gaba	Sncg_Chr14:34810670-34811169	-17.5232	4e-05	0.00106736
093 RT-ZI Gnb3 Gaba	Gnpnat1_Chr14:45772569-45773068	-17.5865	4e-05	0.00106736
093 RT-ZI Gnb3 Gaba	Apex1_Chr14:50903792-50904291	-18.2352	0.00028	0.00695861
093 RT-ZI Gnb3 Gaba	Apex1_Chr14:50944209-50944708	-18.5993	0.00024	0.00598212
093 RT-ZI Gnb3 Gaba	Apex1_Chr14:51082646-51083145	-18.1817	4e-05	0.00106736
093 RT-ZI Gnb3 Gaba	Mettl3_Chr14:51902712-51903211	-16.8852	4e-05	0.00106736
093 RT-ZI Gnb3 Gaba	Gm26590_Chr14:52338585-52339084	-17.5413	4e-05	0.00106736
093 RT-ZI Gnb3 Gaba	Gm43305_Chr14:54059692-54060191	-16.6618	4e-05	0.00106736
093 RT-ZI Gnb3 Gaba	Gm43305_Chr14:54152767-54153266	-16.5206	8e-05	0.00205831
093 RT-ZI Gnb3 Gaba	Gm43305_Chr14:54227840-54228339	-17.6599	4e-05	0.00106736
093 RT-ZI Gnb3 Gaba	Gm43305_Chr14:54238989-54239488	-16.7283	4e-05	0.00106736
093 RT-ZI Gnb3 Gaba	Gm43305_Chr14:54259111-54259610	-17.5536	4e-05	0.00106736
093 RT-ZI Gnb3 Gaba	Gm43305_Chr14:54448911-54449410	-16.3821	4e-05	0.00106736
093 RT-ZI Gnb3 Gaba	Mrpl52_Chr14:54448911-54449410	-16.2046	4e-05	0.00106736
093 RT-ZI Gnb3 Gaba	Gm43305_Chr14:54701265-54701764	-16.6095	4e-05	0.00106736
093 RT-ZI Gnb3 Gaba	Zfhx2os_Chr14:54701265-54701764	-16.1317	4e-05	0.00106736
093 RT-ZI Gnb3 Gaba	Gm43305_Chr14:54714018-54714517	-17.8495	8e-05	0.00205831
093 RT-ZI Gnb3 Gaba	1700123O20Rik_Chr14:54900327-54900826	-18.1168	4e-05	0.00106736
093 RT-ZI Gnb3 Gaba	Psmb5_Chr14:55085154-55085653	0.700115	0.00288	0.0665796
093 RT-ZI Gnb3 Gaba	Psme2_Chr14:55108463-55108962	-17.7313	4e-05	0.00106736
093 RT-ZI Gnb3 Gaba	1700123O20Rik_Chr14:55148401-55148900	-17.0792	0.0002	0.00500355
093 RT-ZI Gnb3 Gaba	Ipo4_Chr14:55189180-55189679	-15.9915	4e-05	0.00106736
093 RT-ZI Gnb3 Gaba	Ngdn_Chr14:55204943-55205442	-15.908	4e-05	0.00106736
093 RT-ZI Gnb3 Gaba	Dcaf11_Chr14:55246800-55247299	-16.303	4e-05	0.00106736
093 RT-ZI Gnb3 Gaba	Gmpr2_Chr14:55246800-55247299	-16.1626	8e-05	0.00205831
093 RT-ZI Gnb3 Gaba	Mdp1_Chr14:55246800-55247299	-17.6934	4e-05	0.00106736
093 RT-ZI Gnb3 Gaba	Psme1_Chr14:55246800-55247299	-17.2436	4e-05	0.00106736
093 RT-ZI Gnb3 Gaba	Zfhx2os_Chr14:55246800-55247299	-16.1432	4e-05	0.00106736
093 RT-ZI Gnb3 Gaba	Mdp1_Chr14:55386711-55387210	-17.4213	4e-05	0.00106736
093 RT-ZI Gnb3 Gaba	Pck2_Chr14:55386711-55387210	-16.7603	4e-05	0.00106736
093 RT-ZI Gnb3 Gaba	Gmpr2_Chr14:55497220-55497719	-16.0886	8e-05	0.00205831
093 RT-ZI Gnb3 Gaba	Gmpr2_Chr14:55518842-55519341	-17.6125	4e-05	0.00106736
093 RT-ZI Gnb3 Gaba	Khnyn_Chr14:55743653-55744152	-17.514	4e-05	0.00106736
093 RT-ZI Gnb3 Gaba	Tm9sf1_Chr14:55743653-55744152	-16.4218	4e-05	0.00106736
093 RT-ZI Gnb3 Gaba	Gmpr2_Chr14:55781172-55781671	-17.2547	0.00012	0.00303964
093 RT-ZI Gnb3 Gaba	Psme2_Chr14:55781172-55781671	-17.4916	4e-05	0.00106736
093 RT-ZI Gnb3 Gaba	Dhrs1_Chr14:55863739-55864238	-16.1145	4e-05	0.00106736
093 RT-ZI Gnb3 Gaba	Khnyn_Chr14:55863739-55864238	-17.2817	4e-05	0.00106736
093 RT-ZI Gnb3 Gaba	Cryl1_Chr14:57679849-57680348	-17.0387	4e-05	0.00106736
093 RT-ZI Gnb3 Gaba	Il17d_Chr14:57951010-57951509	-15.8291	4e-05	0.00106736
093 RT-ZI Gnb3 Gaba	Spata13_Chr14:60385027-60385526	-17.6949	4e-05	0.00106736
093 RT-ZI Gnb3 Gaba	Amer2_Chr14:60525234-60525733	-16.404	4e-05	0.00106736
093 RT-ZI Gnb3 Gaba	Spata13_Chr14:60525234-60525733	-15.7964	4e-05	0.00106736
093 RT-ZI Gnb3 Gaba	Mtmr6_Chr14:60533656-60534155	0.917784	0.00176	0.0417247
093 RT-ZI Gnb3 Gaba	Trim13_Chr14:61112310-61112809	-16.578	4e-05	0.00106736
093 RT-ZI Gnb3 Gaba	Trim13_Chr14:61498139-61498638	-17.3358	4e-05	0.00106736
093 RT-ZI Gnb3 Gaba	Rnaseh2b_Chr14:62042575-62043074	-15.9941	4e-05	0.00106736
093 RT-ZI Gnb3 Gaba	Fam124a_Chr14:62251901-62252400	-16.6334	4e-05	0.00106736
093 RT-ZI Gnb3 Gaba	Rnaseh2b_Chr14:62251901-62252400	-16.0682	4e-05	0.00106736
093 RT-ZI Gnb3 Gaba	Rnaseh2b_Chr14:62492391-62492890	-17.0518	4e-05	0.00106736
093 RT-ZI Gnb3 Gaba	Extl3_Chr14:65169920-65170419	-16.2671	4e-05	0.00106736
093 RT-ZI Gnb3 Gaba	Zfp395_Chr14:65403955-65404454	-17.8527	4e-05	0.00106736
093 RT-ZI Gnb3 Gaba	Bnip3l_Chr14:67135857-67136356	0.9026	0.00248	0.0579269
093 RT-ZI Gnb3 Gaba	Dock5_Chr14:67993097-67993596	-16.492	4e-05	0.00106736
093 RT-ZI Gnb3 Gaba	Kctd9_Chr14:67993097-67993596	-17.565	4e-05	0.00106736
093 RT-ZI Gnb3 Gaba	Kctd9_Chr14:68123363-68123862	-17.7266	4e-05	0.00106736
093 RT-ZI Gnb3 Gaba	Chmp7_Chr14:69830536-69831035	-17.8933	4e-05	0.00106736
093 RT-ZI Gnb3 Gaba	Slc39a14_Chr14:69934292-69934791	-16.0456	4e-05	0.00106736
093 RT-ZI Gnb3 Gaba	Chmp7_Chr14:70021098-70021597	-17.9625	4e-05	0.00106736
093 RT-ZI Gnb3 Gaba	Chmp7_Chr14:70135382-70135881	-18.0082	4e-05	0.00106736
093 RT-ZI Gnb3 Gaba	Nudt18_Chr14:70181032-70181531	-16.8762	4e-05	0.00106736
093 RT-ZI Gnb3 Gaba	Fam160b2_Chr14:70203755-70204254	-16.6824	4e-05	0.00106736
093 RT-ZI Gnb3 Gaba	Fam160b2_Chr14:70470167-70470666	-16.82	4e-05	0.00106736
093 RT-ZI Gnb3 Gaba	Ccar2_Chr14:70537931-70538430	-16.8404	4e-05	0.00106736
093 RT-ZI Gnb3 Gaba	Nudt18_Chr14:70554020-70554519	-17.1871	4e-05	0.00106736
093 RT-ZI Gnb3 Gaba	Fam160b2_Chr14:70628748-70629247	-18.4779	4e-05	0.00106736
093 RT-ZI Gnb3 Gaba	Fam160b2_Chr14:70780717-70781216	-16.6687	4e-05	0.00106736
093 RT-ZI Gnb3 Gaba	Rcbtb2_Chr14:72983357-72983856	-17.2345	4e-05	0.00106736
093 RT-ZI Gnb3 Gaba	Slc25a30_Chr14:75394110-75394609	-17.1709	4e-05	0.00106736
093 RT-ZI Gnb3 Gaba	Slc25a30_Chr14:75767908-75768407	-17.0773	4e-05	0.00106736
093 RT-ZI Gnb3 Gaba	Slc25a30_Chr14:75829337-75829836	-17.1816	4e-05	0.00106736
093 RT-ZI Gnb3 Gaba	Slc25a30_Chr14:75834153-75834652	-16.8809	4e-05	0.00106736
093 RT-ZI Gnb3 Gaba	Slc25a30_Chr14:75876240-75876739	-17.2831	4e-05	0.00106736
093 RT-ZI Gnb3 Gaba	Gpalpp1_Chr14:75899449-75899948	-17.2946	4e-05	0.00106736
093 RT-ZI Gnb3 Gaba	Nufip1_Chr14:75899449-75899948	-17.4495	4e-05	0.00106736
093 RT-ZI Gnb3 Gaba	Serp2_Chr14:76077106-76077605	0.944503	4e-05	0.00106736
093 RT-ZI Gnb3 Gaba	Nufip1_Chr14:76165096-76165595	-17.5146	4e-05	0.00106736
093 RT-ZI Gnb3 Gaba	Slc25a30_Chr14:76186189-76186688	-17.5652	4e-05	0.00106736
093 RT-ZI Gnb3 Gaba	Gpalpp1_Chr14:76254912-76255411	-17.7671	4e-05	0.00106736
093 RT-ZI Gnb3 Gaba	Gtf2f2_Chr14:76254912-76255411	-17.4986	4e-05	0.00106736
093 RT-ZI Gnb3 Gaba	Slc25a30_Chr14:76254912-76255411	-17.2432	4e-05	0.00106736
093 RT-ZI Gnb3 Gaba	Nufip1_Chr14:76308065-76308564	-17.7295	4e-05	0.00106736
093 RT-ZI Gnb3 Gaba	Gpalpp1_Chr14:76466834-76467333	-17.3578	4e-05	0.00106736
093 RT-ZI Gnb3 Gaba	Nufip1_Chr14:76466834-76467333	-17.5601	4e-05	0.00106736
093 RT-ZI Gnb3 Gaba	Rpp14_Chr14:7765810-7766309	-16.0425	4e-05	0.00106736
093 RT-ZI Gnb3 Gaba	Kctd6_Chr14:7901714-7902213	-17.7329	0.00012	0.00303964
093 RT-ZI Gnb3 Gaba	Elf1_Chr14:79273483-79273982	-17.1407	4e-05	0.00106736
093 RT-ZI Gnb3 Gaba	Pcdh8_Chr14:79273483-79273982	-15.9318	4e-05	0.00106736
093 RT-ZI Gnb3 Gaba	Elf1_Chr14:79487165-79487664	-17.5308	4e-05	0.00106736
093 RT-ZI Gnb3 Gaba	Kctd6_Chr14:8355843-8356342	-17.3997	0.00016	0.0040227
093 RT-ZI Gnb3 Gaba	Diaph3_Chr14:87399046-87399545	-16.564	4e-05	0.00106736
093 RT-ZI Gnb3 Gaba	Tdrd3_Chr14:87399046-87399545	0.918777	0.00032	0.00792937
093 RT-ZI Gnb3 Gaba	Bora_Chr14:99142151-99142650	-16.8882	4e-05	0.00106736
093 RT-ZI Gnb3 Gaba	5330439K02Rik_Chr15:100198845-100199344	-16.188	4e-05	0.00106736
093 RT-ZI Gnb3 Gaba	Galnt6_Chr15:100443481-100443980	-17.4579	4e-05	0.00106736
093 RT-ZI Gnb3 Gaba	Csrnp2_Chr15:100604645-100605144	-16.0639	4e-05	0.00106736
093 RT-ZI Gnb3 Gaba	Pou6f1_Chr15:100604645-100605144	-17.1302	4e-05	0.00106736
093 RT-ZI Gnb3 Gaba	5330439K02Rik_Chr15:100682952-100683451	-15.789	4e-05	0.00106736
093 RT-ZI Gnb3 Gaba	Dazap2_Chr15:100682952-100683451	-16.3074	4e-05	0.00106736
093 RT-ZI Gnb3 Gaba	5330439K02Rik_Chr15:100746844-100747343	-16.5325	4e-05	0.00106736
093 RT-ZI Gnb3 Gaba	Galnt6_Chr15:100806327-100806826	-17.8779	8e-05	0.00205831
093 RT-ZI Gnb3 Gaba	Letmd1_Chr15:100806327-100806826	-16.6241	4e-05	0.00106736
093 RT-ZI Gnb3 Gaba	Dazap2_Chr15:101056122-101056621	-16.1059	4e-05	0.00106736
093 RT-ZI Gnb3 Gaba	Acvr1b_Chr15:101105333-101105832	-16.4503	4e-05	0.00106736
093 RT-ZI Gnb3 Gaba	Nr4a1_Chr15:101315723-101316222	-17.6194	8e-05	0.00205831
093 RT-ZI Gnb3 Gaba	Spryd3_Chr15:101772608-101773107	-15.9847	4e-05	0.00106736
093 RT-ZI Gnb3 Gaba	Map3k12_Chr15:102146864-102147363	-17.2206	4e-05	0.00106736
093 RT-ZI Gnb3 Gaba	Mfsd5_Chr15:102399480-102399979	-17.1356	4e-05	0.00106736
093 RT-ZI Gnb3 Gaba	Calcoco1_Chr15:102788776-102789275	-16.2067	4e-05	0.00106736
093 RT-ZI Gnb3 Gaba	Map3k12_Chr15:102788776-102789275	0.898331	0.00208	0.0489561
093 RT-ZI Gnb3 Gaba	Calcoco1_Chr15:103190987-103191486	-16.0276	4e-05	0.00106736
093 RT-ZI Gnb3 Gaba	Golph3_Chr15:12047519-12048018	-17.2056	4e-05	0.00106736
093 RT-ZI Gnb3 Gaba	9330175M20Rik_Chr1:51210582-51211081	-16.215	4e-05	0.00106736
093 RT-ZI Gnb3 Gaba	Cavin2_Chr1:51210582-51211081	-17.2808	4e-05	0.00106736
093 RT-ZI Gnb3 Gaba	Gm28320_Chr1:51210582-51211081	-15.7457	4e-05	0.00106736
093 RT-ZI Gnb3 Gaba	6030458C11Rik_Chr15:12451426-12451925	-16.5291	4e-05	0.00106736
093 RT-ZI Gnb3 Gaba	Rgs20_Chr1:5170326-5170825	0.907635	0.0036	0.082175
093 RT-ZI Gnb3 Gaba	Myo10_Chr15:25713682-25714181	-17.8383	4e-05	0.00106736
093 RT-ZI Gnb3 Gaba	Gm48957_Chr15:25805213-25805712	-16.7921	4e-05	0.00106736
093 RT-ZI Gnb3 Gaba	Gm48957_Chr15:25909757-25910256	-16.2358	4e-05	0.00106736
093 RT-ZI Gnb3 Gaba	Myo10_Chr15:25909757-25910256	-16.6362	4e-05	0.00106736
093 RT-ZI Gnb3 Gaba	Otulinl_Chr15:27325753-27326252	-18.019	4e-05	0.00106736
093 RT-ZI Gnb3 Gaba	Otulinl_Chr15:28181918-28182417	-17.5183	4e-05	0.00106736
093 RT-ZI Gnb3 Gaba	Gm32618_Chr15:32766171-32766670	-17.5697	4e-05	0.00106736
093 RT-ZI Gnb3 Gaba	Ywhaz_Chr15:36979798-36980297	0.758558	8e-05	0.00205831
093 RT-ZI Gnb3 Gaba	Ormdl1_Chr1:53709567-53710066	-16.1733	4e-05	0.00106736
093 RT-ZI Gnb3 Gaba	Pms1_Chr1:53709567-53710066	-15.3834	4e-05	0.00106736
093 RT-ZI Gnb3 Gaba	Baalc_Chr15:38585530-38586029	-17.8129	4e-05	0.00106736
093 RT-ZI Gnb3 Gaba	Dnah7a_Chr1:53909021-53909520	-17.6318	0.00016	0.0040227
093 RT-ZI Gnb3 Gaba	Slc25a32_Chr15:39361967-39362466	-17.3766	4e-05	0.00106736
093 RT-ZI Gnb3 Gaba	Dnah7a_Chr1:54039012-54039511	-17.6272	4e-05	0.00106736
093 RT-ZI Gnb3 Gaba	Aard_Chr15:52292560-52293059	-17.5794	4e-05	0.00106736
093 RT-ZI Gnb3 Gaba	Med30_Chr15:53128482-53128981	-15.8645	4e-05	0.00106736
093 RT-ZI Gnb3 Gaba	Enpp2_Chr15:54816516-54817015	1.16564	0.00028	0.00695861
093 RT-ZI Gnb3 Gaba	Mrpl13_Chr15:55778525-55779024	-16.6679	4e-05	0.00106736
093 RT-ZI Gnb3 Gaba	Zhx2_Chr15:57692948-57693447	-16.4123	4e-05	0.00106736
093 RT-ZI Gnb3 Gaba	Gm29394_Chr15:57728481-57728980	-16.849	0.00012	0.00303964
093 RT-ZI Gnb3 Gaba	Maip1_Chr1:57218730-57219229	-17.1333	4e-05	0.00106736
093 RT-ZI Gnb3 Gaba	1700085D07Rik_Chr15:73192105-73192604	-16.8478	4e-05	0.00106736
093 RT-ZI Gnb3 Gaba	Gm49066_Chr15:73192105-73192604	-15.8769	4e-05	0.00106736
093 RT-ZI Gnb3 Gaba	Dennd3_Chr15:73466547-73467046	-17.7609	4e-05	0.00106736
093 RT-ZI Gnb3 Gaba	1700085D07Rik_Chr15:73472679-73473178	-16.8963	4e-05	0.00106736
093 RT-ZI Gnb3 Gaba	Chrac1_Chr15:73472679-73473178	-15.7935	4e-05	0.00106736
093 RT-ZI Gnb3 Gaba	1700085D07Rik_Chr15:73716269-73716768	-16.9795	4e-05	0.00106736
093 RT-ZI Gnb3 Gaba	Dennd3_Chr15:73833116-73833615	-18.2315	4e-05	0.00106736
093 RT-ZI Gnb3 Gaba	Dennd3_Chr15:73997110-73997609	-18.6122	4e-05	0.00106736
093 RT-ZI Gnb3 Gaba	Ptp4a3_Chr15:74203715-74204214	-17.5405	4e-05	0.00106736
093 RT-ZI Gnb3 Gaba	Adgrb1_Chr15:74302274-74302773	1.02809	0.00168	0.0398747
093 RT-ZI Gnb3 Gaba	Arc_Chr15:74749125-74749624	-17.6341	4e-05	0.00106736
093 RT-ZI Gnb3 Gaba	Arc_Chr15:74968148-74968647	-17.1986	4e-05	0.00106736
093 RT-ZI Gnb3 Gaba	Maip1_Chr1:57512521-57513020	-16.9511	4e-05	0.00106736
093 RT-ZI Gnb3 Gaba	Tsta3_Chr15:75575161-75575660	-17.4222	4e-05	0.00106736
093 RT-ZI Gnb3 Gaba	Bop1_Chr15:76139900-76140399	-17.0707	4e-05	0.00106736
093 RT-ZI Gnb3 Gaba	Cpsf1_Chr15:76139900-76140399	-16.9131	4e-05	0.00106736
093 RT-ZI Gnb3 Gaba	Cpsf1_Chr15:76147722-76148221	-16.7664	4e-05	0.00106736
093 RT-ZI Gnb3 Gaba	Gpaa1_Chr15:76147722-76148221	-16.2028	4e-05	0.00106736
093 RT-ZI Gnb3 Gaba	Mroh1_Chr15:76147722-76148221	-15.8186	4e-05	0.00106736
093 RT-ZI Gnb3 Gaba	Pycrl_Chr15:76147722-76148221	-16.9544	4e-05	0.00106736
093 RT-ZI Gnb3 Gaba	Scrt1_Chr15:76147722-76148221	-16.8033	4e-05	0.00106736
093 RT-ZI Gnb3 Gaba	Tsta3_Chr15:76147722-76148221	-17.4131	4e-05	0.00106736
093 RT-ZI Gnb3 Gaba	Zc3h3_Chr15:76147722-76148221	-15.8129	4e-05	0.00106736
093 RT-ZI Gnb3 Gaba	Zfp707_Chr15:76147722-76148221	-16.5129	4e-05	0.00106736
093 RT-ZI Gnb3 Gaba	Sharpin_Chr15:76208035-76208534	-17.6433	4e-05	0.00106736
093 RT-ZI Gnb3 Gaba	Fbxl6_Chr15:76208889-76209388	-17.4702	4e-05	0.00106736
093 RT-ZI Gnb3 Gaba	Grina_Chr15:76208889-76209388	0.500394	0.00304	0.0699911
093 RT-ZI Gnb3 Gaba	Sharpin_Chr15:76208889-76209388	-17.6611	4e-05	0.00106736
093 RT-ZI Gnb3 Gaba	Fbxl6_Chr15:76230759-76231258	-17.4043	4e-05	0.00106736
093 RT-ZI Gnb3 Gaba	Gpt_Chr15:76239031-76239530	-18.0241	0.0002	0.00500355
093 RT-ZI Gnb3 Gaba	Sharpin_Chr15:76239031-76239530	-17.0534	4e-05	0.00106736
093 RT-ZI Gnb3 Gaba	Tsta3_Chr15:76239031-76239530	-17.4054	4e-05	0.00106736
093 RT-ZI Gnb3 Gaba	Bop1_Chr15:76307094-76307593	-16.7142	4e-05	0.00106736
093 RT-ZI Gnb3 Gaba	Gpt_Chr15:76307094-76307593	-16.7802	0.00012	0.00303964
093 RT-ZI Gnb3 Gaba	Rpl8_Chr15:76519412-76519911	0.468326	8e-05	0.00205831
093 RT-ZI Gnb3 Gaba	Fbxl6_Chr15:76552624-76553123	-16.3038	4e-05	0.00106736
093 RT-ZI Gnb3 Gaba	Gpt_Chr15:76552624-76553123	-16.7396	0.00012	0.00303964
093 RT-ZI Gnb3 Gaba	Sharpin_Chr15:76552624-76553123	-17.604	4e-05	0.00106736
093 RT-ZI Gnb3 Gaba	Sharpin_Chr15:76781254-76781753	-17.1204	4e-05	0.00106736
093 RT-ZI Gnb3 Gaba	Cpsf1_Chr15:76973652-76974151	-17.6162	4e-05	0.00106736
093 RT-ZI Gnb3 Gaba	Fbxl6_Chr15:76973652-76974151	-16.2645	4e-05	0.00106736
093 RT-ZI Gnb3 Gaba	Ppp1r16a_Chr15:77029287-77029786	-18.746	0.00016	0.0040227
093 RT-ZI Gnb3 Gaba	1110038F14Rik_Chr15:77225199-77225698	-15.574	4e-05	0.00106736
093 RT-ZI Gnb3 Gaba	Maip1_Chr1:57775033-57775532	-17.2128	4e-05	0.00106736
093 RT-ZI Gnb3 Gaba	Ift27_Chr15:77775487-77775986	-16.1418	4e-05	0.00106736
093 RT-ZI Gnb3 Gaba	A730060N03Rik_Chr15:77857549-77858048	-16.8582	4e-05	0.00106736
093 RT-ZI Gnb3 Gaba	Ift27_Chr15:77857549-77858048	-15.8577	4e-05	0.00106736
[truncated: 43,672 more rows]

## Sheet: MGI symbol change list
old symbol	MGI Gene/Marker ID	Symbol	Name
Sept4	MGI:1270156	Septin4	septin 4
Adssl1	MGI:87947	Adss1	adenylosuccinate synthase 1
Mpp5	MGI:1927339	Pals1	protein associated with LIN7 1, MAGUK family member
Qk	MGI:97837	Qki	quaking, KH domain containing RNA binding
2810468N07Rik	MGI:1920084	Cerox1	cytoplasmic endogenous regulator of oxidative phosphorylation 1
Gramd3	MGI:1914815	Gramd2b	GRAM domain containing 2B
March3	MGI:2443667	Marchf3	membrane associated ring-CH-type finger 3
Cbwd1	MGI:2385089	Zng1	Zn regulated GTPase metalloprotein activator 1
Fam129b	MGI:2442910	Niban2	niban apoptosis regulator 2
Spg20	MGI:2139806	Spart	spartin
Sept7	MGI:1335094	Septin7	septin 7
Ube2cbp	MGI:1917598	Ube3d	ubiquitin protein ligase E3D
Gm5136	MGI:3647286	Brcc3dc	BRCA1/BRCA2-containing complex, subunit 3, domain containing
1190007I07Rik	MGI:3698433	Uqcc6	ubiquinol-cytochrome c reductase complex assembly factor 6
Btbd11	MGI:1921257	Abtb3	ankyrin repeat and BTB domain containing 3
2810410L24Rik	MGI:1923627	Reno1	regulator of early neurogenesis 1
0610010F05Rik	MGI:1918925	Sanbr	SANT and BTB domain regulator of CSR
Hist3h2ba	MGI:1925553	H2bc27	H2B clustered histone 27
Wars	MGI:104630	Wars1	tryptophanyl-tRNA synthetase1
Gm9866	MGI:3643118	Silc1	sciatic injury induced lincRNA upregulator of SOX11
Hist1h1c	MGI:1931526	H1f2	H1.2 linker histone, cluster member
Hist1h2be	MGI:2448380	H2bc6	H2B clustered histone 6
Hist1h4d	MGI:2448423	H4c4	H4 clustered histone 4
Gm10037	MGI:3645096	Krbox5	KRAB box domain containing 5
2010300C02Rik	MGI:1919347	Cracdl	capping protein inhibiting regulator of actin like
Fut11	MGI:1920318	Pofut4	protein O-fucosyltransferase 4
Fam160b2	MGI:3036290	Fhip2b	FHF complex subunit HOOK interacting protein 2B
Gm48957	MGI:3648948	Gm5468	predicted gene 5468
Tsta3	MGI:98857	Gfus	GDP-L-fucose synthase
Pycrl	MGI:1913444	Pycr3	pyrroline-5-carboxylate reductase 3
Tctex1d2	MGI:1913311	Dynlt2b	dynein light chain Tctex-type 2B
9030025P20Rik	MGI:3583895	Ermardl2	ER membrane associated RNA degradation like 2
Cramp1l	MGI:1930190	Cramp1	cramped chromatin regulator 1
H2-Ke6	MGI:95911	Hsd17b8	hydroxysteroid 17-beta dehydrogenase 8
Skiv2l	MGI:1099835	Skic2	SKI2 subunit of superkiller complex
Lars	MGI:1913808	Lars1	leucyl-tRNA synthetase 1
Fam122a	MGI:1915284	Pabir1	PP2A A alpha (PPP2R1A) and B55A (PPP2R2A) interacting phosphatase regulator 1
9930021J03Rik	MGI:2444398	Brd10	bromodomain containing 10
Sept2	MGI:97298	Septin2	septin 2
2700046G09Rik	MGI:1914438	Sgms1os1	Sgms1 opposite strand transcript 1
1700037H04Rik	MGI:1914576	Adissp	adipose secreted signaling protein
2900097C17Rik	MGI:1914767	Norad	non-coding RNA activated by DNA damage
Atp5g3	MGI:2442035	Atp5mc3	ATP synthase membrane subunit c locus 3
Lhfp	MGI:1891214	Lhfpl1	lipoma HMGIC fusion partner-like 1
Lhfp	MGI:1920048	Lhfpl6	LHFPL tetraspan subfamily member 6
Ctps	MGI:1858304	Ctps1	cytidine 5'-triphosphate synthase 1
9930104L06Rik	MGI:3041172	Airim	AFG2 interacting ribosome maturation factor
Adprhl2	MGI:2140364	Adprs	ADP-ribosylserine hydrolase
C77080	MGI:2140651	Nhsl3	NHS like 3
Pqlc2	MGI:2384837	Slc66a1	solute carrier family 66 member 1
Fam214b	MGI:2441854	Atosb	atos homolog B
2410131K14Rik	MGI:1924042	Spring1	SREBF pathway regulator in golgi 1
2810006K23Rik	MGI:1919900	Mtrfr	mitochondrial translation release factor in rescue
Map11	MGI:2385896	Trappc14	trafficking protein particle complex 14
3110082I17Rik	MGI:1920462	Chlsn	cholesin
E130309D02Rik	MGI:2442621	Ints15	integrator complex subunit 15
C530008M17Rik	MGI:2444817	Cracd	capping protein inhibiting regulator of actin
H2afj	MGI:3606192	H2aj	H2J.A histone
Ttc26	MGI:2444853	Ift56	intraflagellar transport 56
H1fx	MGI:2685307	H1f10	H1.10 linker histone
Fam160a2	MGI:1921599	Fhip1b	FHF complex subunit HOOK interacting protein 1B
Fam57b	MGI:1916202	Tlcd3b	TLC domain containing 3B
BC017158	MGI:2384572	Rusf1	RUS family member 1
Cars	MGI:1351477	Cars1	cysteinyl-tRNA synthetase 1
Gm2115	MGI:3780284	Ctxnd1	cortexin domain containing 1
4931428F04Rik	MGI:1921606	Matcap1	microtubule associated tyrosine carboxypeptidase 1
Kars	MGI:1934754	Kars1	lysyl-tRNA synthetase 1
1700029J07Rik	MGI:1916729	Cfap96	cilia and flagella associated protein 96
Zfp651	MGI:2670992	Zbtb47	zinc finger and BTB domain containing 47
Tmem136	MGI:2685030	Tlcd5	TLC domain containing 5
H2afx	MGI:102688	H2ax	H2A.X variant histone
Atp5l	MGI:1351597	Atp5mg	ATP synthase membrane subunit g
2310009A05Rik	MGI:1913614	Pigbos1	Pigb opposite strand 1
Ick	MGI:1934157	Cilk1	ciliogenesis associated kinase 1
Mars	MGI:1345633	Mars1	methionine-tRNA synthetase 1
Sept10	MGI:1918110	Septin10	septin 10
H2afy2	MGI:3037658	Macroh2a2	macroH2A.2 histone
Fam104a	MGI:106351	Vcf1	VCP nuclear cofactor family member 1
Sept9	MGI:1858222	Septin9	septin 9
0610009B22Rik	MGI:1913300	Trappc2b	trafficking protein particle complex 2B
Fam57a	MGI:2151840	Tlcd3a	TLC domain containing 3A
Tmem251	MGI:2443862	Lyset	lysosomal enzyme trafficking factor
2210016F16Rik	MGI:1917403	Qng1	Q-nucleotide N-glycosylase 1
Smim4	MGI:1913737	Uqcc5	ubiquinol-cytochrome c reductase complex assembly factor 5
2310039H08Rik	MGI:1914351	Pex39	peroxisomal biogenesis factor 39
Fam160b1	MGI:2147545	Fhip2a	FHF complex subunit HOOK interacting protein 2A
Tmem189	MGI:2142624	Peds1	plasmanylethanolamine desaturase 1
Ccdc173	MGI:1923100	Cfap210	cilia and flagella associated protein 210
Fam102b	MGI:3036259	Eeig2	EEIG family member 2
Tmem56	MGI:1923195	Tlcd4	TLC domain containing 4
Yars	MGI:2147627	Yars1	tyrosyl-tRNA synthetase 1
Sept1	MGI:1858916	Septin1	septin 1
Cd3eap	MGI:1917583	Polr1g	RNA polymerase I subunit G
4931406P16Rik	MGI:1924311	Garre1	granule associated Rac and RHOG effector 1
Fam71e1	MGI:1922788	Garin5a	golgi associated RAB2 interactor 5A
Sept6	MGI:1888939	Septin6	septin 6
Atp5b	MGI:107801	Atp5f1b	ATP synthase F1 subunit beta
Sept8	MGI:894310	Septin8	septin 8
Mettl7a1	MGI:1916523	Tmt1a	thiol methyltransferase 1A1
Tmem8	MGI:1926283	Pgap6	post-glycosylphosphatidylinositol attachment to proteins 6
2810004N23Rik	MGI:1913773	Fsaf1	40S small subunit processome assembly factor 1
Gm2694	MGI:3780864	Cbln1os	cerebellin 1 precursor protein opposite strand
Kif1bp	MGI:1919570	Kifbp	kinesin family binding protein
D11Wsu47e	MGI:106356	Mtnap1	mitochondrial nucleoid associated protein 1
Hist3h2a	MGI:2448458	H2ac25	H2A clustered histone 25
Fam71d	MGI:1918147	Garin2	golgi associated RAB2 interactor 2
Sept5	MGI:1195461	Septin5	septin 5
Gpr1	MGI:2385324	Cmklr2	chemerin chemokine-like receptor 2
4933408B17Rik	MGI:3045347	Brd8dc	BRD8 domain containing
4931423N10Rik	MGI:1918231	Ankrd68	ankyrin repeat domain 68
Gm42609	MGI:3642047	Gm9831	predicted gene 9831
Gm44696	MGI:4439554	Gm16630	predicted gene, 16630
March9	MGI:2446144	Marchf9	membrane associated ring-CH-type finger 9
Fam207a	MGI:1916334	Slx9	SLX9 ribosome biogenesis factor
Gm2000	MGI:3780170	Rpl35rt	ribosomal protein L35, retrotransposed
Gm45716	MGI:5804831	Smim36	small integral membrane protein 36
Atp5mpl	MGI:1917507	Atp5mj	ATP synthase membrane subunit j
Fam49a	MGI:1261783	Cyria	CYFIP related Rac1 interactor A
Sfta3-ps	MGI:2144804	Sfta3	surfactant associated 3
BC067074	MGI:3040697	Cspg4b	chondroitin sulfate proteoglycan 4B
Hist1h2bc	MGI:1915274	H2bc4	H2B clustered histone 4
Hist1h1e	MGI:1931527	H1f4	H1.4 linker histone, cluster member
1700001L19Rik	MGI:1916565	Cfap90	cilia and flagella associated protein 90
Gm48960	MGI:1918154	4921515G04Rik	RIKEN cDNA 4921515G04 gene
Lrrc6	MGI:1859553	Dnaaf11	dynein axonemal assembly factor 11
4932438H23Rik	MGI:1921637	Epcip	exosomal polycystin 1 interacting protein
BC051142	MGI:3039565	Tsbp1	testis expressed basic protein 1
Fam189a2	MGI:2685813	Entrep1	endosomal transmembrane epsin interactor 1
Wdr34	MGI:1919070	Dync2i2	dynein 2 intermediate chain 2
Kirrel	MGI:1891396	Kirrel1	kirre like nephrin family adhesion molecule 1
Pramef8	MGI:2140473	Pramel12	PRAME like 12
Tarsl2	MGI:2444486	Tars3	threonyl-tRNA synthetase 3
Ccdc130	MGI:1914986	Yju2b	YJU2 splicing factor homolog B
4930432K21Rik	MGI:1921916	Brme1	break repair meiotic recombinase recruitment factor 1
Qars	MGI:1915851	Qars1	glutaminyl-tRNA synthetase 1
Atp5d	MGI:1913293	Atp5f1d	ATP synthase F1 subunit delta
1700023F06Rik	MGI:1916691	Efcab15	EF-hand calcium binding domain 15
Rars	MGI:1914297	Rars1	arginyl-tRNA synthetase 1
H2afv	MGI:1924855	H2az2	H2A.Z histone variant 2
Eprs	MGI:97838	Eprs1	glutamyl-prolyl-tRNA synthetase 1
Phb	MGI:97572	Phb1	prohibitin 1
Twistnb	MGI:106292	Polr1f	RNA polymerase I subunit F
3830406C13Rik	MGI:1917937	Cep15	centrosomal protein 15
Atp5g2	MGI:1915192	Atp5mc2	ATP synthase membrane subunit c locus 2
AW549877	MGI:2146232	Rimoc1	RAB7A interacting MON1-CCZ1 complex subunit 1
1500009C09Rik	MGI:1923755	Smim45	small integral membrane protein 45
Wrb	MGI:2136882	Get1	guided entry of tail-anchored proteins factor 1
Slc9a3r2	MGI:1890662	Nherf2	NHERF family PDZ scaffold protein 2
Uhrf1bp1	MGI:3041238	Bltp3a	bridge-like lipid transfer protein family member 3A
March4	MGI:2683550	Marchf4	membrane associated ring-CH-type finger 4
Znrd1	MGI:1913386	Polr1h	RNA polymerase I subunit H
Pqlc1	MGI:1914193	Slc66a2	solute carrier family 66 member 2
4430402I18Rik	MGI:1918036	Spata6l	spermatogenesis associated 6 like
Gm960	MGI:2685806	Top6bl	TOP6B like initiator of meiotic double strand breaks
A530058N18Rik	MGI:2444858	Gjd2os	gap junction protein, delta 2 opposite strand
1110008P14Rik	MGI:1920987	Bbln	bublin coiled coil protein
Fam102a	MGI:2138935	Eeig1	estrogen-induced osteoclastogenesis regulator 1
4932438A13Rik	MGI:2444631	Bltp1	bridge-like lipid transfer protein family member 1
Rrnad1	MGI:2387197	Mettl25b	methyltransferase like 25B
Hspb11	MGI:1920188	Ift25	intraflagellar transport 25
2610301B20Rik	MGI:1914407	Cfap418	cilia and flagella associated protein 418
5430403G16Rik	MGI:1924450	Zfp1007	zinc finger protein 1007
Fam126a	MGI:2149839	Hycc1	hyccin PI4KA lipid kinase complex subunit 1
Nupl2	MGI:2387631	Nup42	nucleoporin 42
Akr1b3	MGI:1353494	Akr1b1	aldo-keto reductase family 1 member B
Arntl	MGI:1096381	Bmal1	basic helix-loop-helix ARNT like 1
Gm42372	MGI:5625257	Pnma8c	PNMA family member 8C
D230025D16Rik	MGI:2443049	Phaf1	phagosome assembly factor 1
Fam192a	MGI:1919637	Psme3ip1	proteasome activator subunit 3 interacting protein 1
Ccdc84	MGI:2685960	Cenatac	centrosomal AT-AC splicing factor
Fam214a	MGI:2387648	Atosa	atos homolog A
Gm38394	MGI:3828086	Zbed6	zinc finger, BED type containing 6
March6	MGI:2442773	Marchf6	membrane associated ring-CH-type finger 6
Fgfr1op	MGI:1922546	Cep43	centrosomal protein 43
Hars	MGI:108087	Hars1	histidyl-tRNA synthetase 1
March5	MGI:1915207	Marchf5	membrane associated ring-CH-type finger 5
Fam45a	MGI:1915144	Dennd10	DENN domain containing 10
BC029722	MGI:3584273	Mmp24os1	matrix metallopeptidase 24 opposite strand transcript 1
Gba	MGI:95665	Gba1	glucosylceramidase beta 1
Wdr78	MGI:2385328	Dnai4	dynein axonemal intermediate chain 4
Gm27199	MGI:5521042	Lhx5as1	LIM homeobox 5, antisense 1
2610001J05Rik	MGI:1913770	Smim30	small integral membrane protein 30
1110032A03Rik	MGI:1915971	Cfap68	cilia and flagella associated protein 68
Gramd2	MGI:3528937	Gramd2a	GRAM domain containing 2A
1600002K03Rik	MGI:1917020	Fam174c	family with sequence similarity 174, member C
Zfp781	MGI:3696710	Zfp781b	zinc finger protein 781B
Spata48	MGI:1921112	Spmip7	sperm microtubule inner protein 7
4930505A04Rik	MGI:1922337	Cimip6	ciliary microtubule inner protein 6
Eef1aknmt	MGI:1918699	Mettl13	methyltransferase 13, eEF1A lysine and N-terminal methyltransferase
0610010K14Rik	MGI:1915609	Bacc1	BPTF associated chromatin complex component 1
2610507B11Rik	MGI:1919753	Bltp2	bridge-like lipid transfer protein family member 2
Alg10b	MGI:2146159	Alg10	ALG10 alpha-1,2-glucosyltransferase
Gm3435	MGI:3810125	Ermardl1	ER membrane associated RNA degradation like 1
Gm3448	MGI:3809205	Dynlt2a2	dynein light chain Tctex-type 2A2
AI413582	MGI:2146839	Smim29	small integral membrane protein 29
Olfr239	MGI:3030073	Or10h1	olfactory receptor family 10 subfamily H member 1
Vars	MGI:90675	Vars1	valyl-tRNA synthetase 1
C030017B01Rik	MGI:1914659	Kctd16	potassium channel tetramerisation domain containing 16
2700081O15Rik	MGI:1919667	Zfta	zinc finger translocation associated
Gm10130	MGI:3642547	Zfp1001	zinc finger protein 1001
Gm11808	MGI:3649356	Uba52rt	ubiquitin A-52 residue ribosomal protein fusion product 1, retrotransposed
1110017D15Rik	MGI:1920971	Spmip6	sperm microtubule inner protein 6
0610040J01Rik	MGI:1923511	Pgcka1	PDCD10 and GCKIII kinases associated 1
1810058I24Rik	MGI:1914955	Stmp1	short transmembrane mitochondrial protein 1
Ccdc189	MGI:2685012	Cfap119	cilia and flagella associated protein 119
Ddx39	MGI:1915528	Ddx39a	DEAD box helicase 39a
2210011C24Rik	MGI:1917384	Misp3	MISP family member 3
BC049352	MGI:3040681	Smim35	small integral membrane protein 35
Gm21887	MGI:2384747	Erdr1x	erythroid differentiation regulator 1 x
Marc2	MGI:1914497	Mtarc2	mitochondrial amidoxime reducing component 2
Iars	MGI:2145219	Iars1	isoleucyl-tRNA synthetase 1
Col4a3bp	MGI:1915268	Cert1	ceramide transporter 1
Fam49b	MGI:1923520	Cyrib	CYFIP related Rac1 interactor B
0610012G03Rik	MGI:1913301	Ncbp2as2	Ncbp2 antisense 2 (head to head)
St5	MGI:108517	Dennd2b	DENN domain containing 2B
Ccpg1os	MGI:3648770	Pierce2	piercer of microtubule wall 2
Apopt1	MGI:1915270	Coa8	cytochrome c oxidase assembly factor 8
Sypl	MGI:108081	Sypl1	synaptophysin like 1
4930452B06Rik	MGI:1926154	Cfap20dc	CFAP20 domain containing
Wdyhv1	MGI:1924023	Ntaq1	N-terminal glutamine amidase 1
Fopnl	MGI:1913336	Cep20	centrosomal protein 20
Efcab1	MGI:1914043	Clxn	calaxin
Atp5o	MGI:106341	Atp5po	ATP synthase peripheral stalk subunit OSCP
Zadh2	MGI:2444835	Ptgr3	prostaglandin reductase 3
4921507P07Rik	MGI:1918071	Spmip4	sperm microtubule inner protein 4
Ccdc151	MGI:1924859	Odad3	outer dynein arm docking complex subunit 3
C330007P06Rik	MGI:1924894	Steep1	STING1 ER exit protein 1
B230118H07Rik	MGI:1915420	Iftap	intraflagellar transport associated protein
Mpp6	MGI:1927340	Pals2	protein associated with LIN7 2, MAGUK family member
Bves	MGI:1346013	Popdc1	popeye domain cAMP effector 1
March2	MGI:1925915	Marchf2	membrane associated ring-CH-type finger 2
Atp5md	MGI:1891435	Atp5mk	ATP synthase membrane subunit k
Pak7	MGI:1920334	Pak5	p21 (RAC1) activated kinase 5
March8	MGI:1919029	Marchf8	membrane associated ring-CH-type finger 8
Fam189a1	MGI:1917888	Entrep2	endosomal transmembrane epsin interactor 2
4930430F08Rik	MGI:1921197	Rlig1	RNA 5'-phosphate and 3'-OH ligase 1
Hexdc	MGI:3605542	Hexd	hexosaminidase D
Wdr92	MGI:2144224	Dnaaf10	dynein axonemal assembly factor 10
Skp1a	MGI:103575	Skp1	S-phase kinase-associated protein 1
Elmsan1	MGI:2685106	Mideas	mitotic deacetylase associated SANT domain protein
Ero1lb	MGI:1914725	Ero1b	endoplasmic reticulum oxidoreductase 1 beta
Rnf219	MGI:1919736	Obi1	ORC ubiquitin ligase 1
Ccdc58	MGI:2146423	Mix23	mitochondrial matrix import factor 23
Olfr1564	MGI:3782645	Or10h5	olfactory receptor family 10 subfamily H member 5
Gm17018	MGI:1924407	Dpcd	deleted in primary ciliary dyskinesia
D1Ertd622e	MGI:1277184	Macir	macrophage immunometabolism regulator
4930402H24Rik	MGI:1923029	Dnaaf9	dynein axonemal assembly factor 9
Soga1	MGI:2444575	Mtcl2	microtubule crosslinking factor 2
Gm45902	MGI:5805017	Msantd7	Myb/SANT DNA binding domain containing 7
B230334C09Rik	MGI:2676665	Lrrc7	leucine rich repeat containing 7
Gyg	MGI:1351614	Gyg1	glycogenin 1
1700094D03Rik	MGI:1920795	Cfap141	cilia and flagella associated protein 141
Grrp1	MGI:1919940	Fam110d	family with sequence similarity 110, member D
Gm42517	MGI:5662654	Tmem271rt	transmembrane protein 271, retrotransposed
Pnmal1	MGI:1918941	Pnma8a	PNMA family member 8A
Tmem28	MGI:3648377	Nalf2	NALCN channel auxiliary factor 2
1700021F05Rik	MGI:1915101	Mtres1	mitochondrial transcription rescue factor 1
Gm11639	MGI:1918144	Efcab3	EF-hand calcium binding domain 3
Gm20075	MGI:5012260	Btf3l4b	basic transcription factor 3 like 4B
Cenpj	MGI:2684927	Cpap	centrosome assembly and centriole elongation protein
Casc4	MGI:2443129	Golm2	golgi membrane protein 2
5330417C22Rik	MGI:1923930	Elapor1	endosome-lysosome associated apoptosis and autophagy regulator 1
Gm30731	MGI:5589890	Lncpnky	lncRNA Pou3f2 adjacent neural key regulator
Pzp	MGI:87854	Pzp2	PZP alpha-2-macroglobulin like 2
Tmem159	MGI:1925752	Ldaf1	lipid droplet assembly factor 1
Cd163l1	MGI:2443796	Scart1	scavenger receptor family member expressed on T cells 1
BC024978	MGI:3041247	Actmap	actin maturation protease
G530011O06Rik	MGI:3603513	G530011O06Rikx	RIKEN cDNA G530011O06 gene x
Dars	MGI:2442544	Dars1	aspartyl-tRNA synthetase 1
1110051M20Rik	MGI:1915079	Cstpp1	centriolar satellite-associated tubulin polyglutamylase complex regulator 1
Sars	MGI:102809	Sars1	seryl-tRNA synthetase 1
1810037I17Rik	MGI:1914954	Arln	allregulin
1700012D14Rik	MGI:1922729	Zbed5-ps	zinc finger, BED type containing 5, pseudogene
Slc9a3r1	MGI:1349482	Nherf1	NHERF family PDZ scaffold protein 1
Chil1	MGI:1340899	Chi3l1	chitinase 3 like 1
H2afy	MGI:1349392	Macroh2a1	macroH2A.1 histone
Tmem191c	MGI:107238	Tmem191	transmembrane protein 191
BC003965	MGI:2670966	Uqcc4	ubiquinol-cytochrome c reductase complex assembly factor 4
Fam189b	MGI:1915771	Entrep3	endosomal transmembrane epsin interactor 3
Tprgl	MGI:1915058	Tprg1l	transformation related protein 63 regulated 1 like
Gm17660	MGI:4937294	Scpppq1	secretory calcium-binding phosphoprotein proline-glutamine rich 1
9330182L06Rik	MGI:2443264	Elapor2	endosome-lysosome associated apoptosis and autophagy regulator family member 2
Gars	MGI:2449057	Gars1	glycyl-tRNA synthetase 1
Lrrc29	MGI:2443262	Fbxl9	F-box and leucine-rich repeat protein 9
9530077C05Rik	MGI:1915533	Matcap2	microtubule associated tyrosine carboxypeptidase 2
Nars	MGI:1917473	Nars1	asparaginyl-tRNA synthetase 1
8030462N17Rik	MGI:2444951	Ark2n	arkadia (RNF111) N-terminal like PKA signaling regulator 2N
Pnmal2	MGI:3645856	Pnma8b	PNMA family member 8B
Wdr61	MGI:1917493	Skic8	SKI8 subunit of superkiller complex
