# Supplementary material for: Single-nucleus multiomic profiling of the aging mouse substantia nigra reveals conserved gene alterations linked to Parkinson's disease
Source: HighWire-hosted journal article supplement (doi:10.1101/gr.281113.125), 2026-04
Supplement: Supplemental_Table_S6.xlsx [file Supplemental_Table_S6.xlsx]

## Sheet: Supplemental_Table_S6
Supplemental Table S6: Conserved associations between cCRE and gene links in human brain
PDC	mouse_ccre_in_hg38	human_ccre	human_ccre_coord	human_gene
Stat6|Chr10:127326134-127326633	Chr12:57475850-57476370	Chr12-57475035-57480142	Chr12:57475035-57480142	STAT6
Metap2|Chr10:93888933-93889432	Chr12:95474430-95474968	Chr12-95472707-95475199	Chr12:95472707-95475199	METAP2
Cnp|Chr11:100168939-100169438	Chr17:41548911-41549276	Chr17-41547552-41550022	Chr17:41547552-41550022	CNP
Prkca|Chr11:108020698-108021197	Chr17:66680428-66680923	Chr17-66678641-66685085	Chr17:66678641-66685085	PRKCA
Prkca|Chr11:108025638-108026137	Chr17:66673805-66674349	Chr17-66670786-66677315	Chr17:66670786-66677315	PRKCA
Kctd2|Chr11:115699250-115699749	Chr17:75393649-75394193	Chr17-75390067-75395125	Chr17:75390067-75395125	KCTD2
Rack1|Chr11:48856360-48856859	Chr5:181188394-181188782	Chr5-181186081-181195644	Chr5:181186081-181195644	RACK1
Ubb|Chr11:62613609-62614108	Chr17:16452830-16453613	Chr17-16452305-16454173	Chr17:16452305-16454173	UBB
Efnb3|Chr11:69561433-69561932	Chr17:7703327-7703853	Chr17-7703196-7706272	Chr17:7703196-7706272	EFNB3
Aldoc|Chr11:78490661-78491160	Chr17:28381227-28381726	Chr17-28380865-28381980	Chr17:28380865-28381980	ALDOC
Itga3|Chr11:95046901-95047400	Chr17:50087369-50087887	Chr17-50087379-50088454	Chr17:50087379-50088454	ITGA3
Rps29|Chr12:69360618-69361117	Chr14:49862114-49862462	Chr14-49860560-49869491	Chr14:49860560-49869491	RPS29
Zfp36l1|Chr12:80239276-80239775	Chr14:68962096-68962670	Chr14-68961734-68962722	Chr14:68961734-68962722	ZFP36L1
Arrdc3|Chr13:80947487-80947986	Chr5:91303037-91303884	Chr5-91300096-91307369	Chr5:91300096-91307369	ARRDC3
Ptcd2|Chr13:99609304-99609803	Chr5:72014077-72014669	Chr5-72013258-72016085	Chr5:72013258-72016085	PTCD2
Cmtm5|Chr14:55054965-55055464	Chr14:23514319-23514832	Chr14-23510564-23517084	Chr14:23510564-23517084	CMTM5
Plcl1|Chr1:55454002-55454501	Chr2:197851873-197852416	Chr2-197846407-197856401	Chr2:197846407-197856401	PLCL1
Slc38a2|Chr15:96527649-96528148	Chr12:46137447-46137956	Chr12-46135892-46138360	Chr12:46135892-46138360	SLC38A2
Litaf|Chr16:10992871-10993370	Chr16:11586731-11586998	Chr16-11581642-11588425	Chr16:11581642-11588425	LITAF
Igsf11|Chr16:38673376-38673875	Chr3:119329579-119330087	Chr3-119328306-119333248	Chr3:119328306-119333248	IGSF11
Sec14l5|Chr16:4907408-4907907	Chr16:4650405-4651286	Chr16-4648260-4652425	Chr16:4648260-4652425	SEC14L5
Agpat4|Chr17:12168393-12168892	Chr6:161215905-161216464	Chr6-161214062-161219382	Chr6:161214062-161219382	AGPAT4
Inha|Chr1:75495132-75495631	Chr2:219560302-219560961	Chr2-219560346-219561096	Chr2:219560346-219561096	INHA
Synj2|Chr17:6002481-6002980	Chr6:158050736-158054823	Chr6-158053416-158054172	Chr6:158053416-158054172	SYNJ2
Kctd16|Chr18:40178683-40179182	Chr5:144142198-144142750	Chr5-144141688-144142762	Chr5:144141688-144142762	KCTD16
Ccdc112|Chr18:46358104-46358603	Chr5:115349563-115349935	Chr5-115348946-115350555	Chr5:115348946-115350555	CCDC112
Sec11c|Chr18:65648145-65648644	Chr18:58944710-58945240	Chr18-58943931-58945965	Chr18:58943931-58945965	SEC11C
Cbwd1|Chr19:24634515-24635014	Chr9:68584468-68584990	Chr9-68584200-68585086	Chr9:68584200-68585086	CBWD3
Neat1|Chr19:5856518-5857017	Chr11:65404599-65405128	Chr11-65403271-65405468	Chr11:65403271-65405468	NEAT1
Stmn3|Chr2:181159187-181159686	Chr20:63501983-63502481	Chr20-63494432-63503333	Chr20:63494432-63503333	STMN3
Asb6|Chr2:30684969-30685468	Chr9:129451337-129451698	Chr9-129450863-129453099	Chr9:129450863-129453099	ASB6
S100a16|Chr3:90540935-90541434	Chr1:153608771-153609276	Chr1-153606311-153613778	Chr1:153606311-153613778	S100A16
Csmd2|Chr4:128218015-128218514	Chr1:33908344-33908841	Chr1-33907992-33909236	Chr1:33907992-33909236	CSMD2
Cyth3|Chr5:143253560-143254059	Chr7:6653748-6654247	Chr7-6653637-6655008	Chr7:6653637-6655008	CYTH3
Sorcs2|Chr5:36113006-36113505	Chr4:7591654-7592179	Chr4-7589879-7592767	Chr4:7589879-7592767	SORCS2
Dancr|Chr5:74205394-74205893	Chr4:52873075-52873550	Chr4-52873032-52874480	Chr4:52873032-52874480	DANCR
Cacna1c|Chr6:119108860-119109359	Chr12:2052016-2052566	Chr12-2051560-2055856	Chr12:2051560-2055856	CACNA1C
Rab11fip5|Chr6:85346150-85346649	Chr2:73085462-73086083	Chr2-73085209-73086448	Chr2:73085209-73086448	RAB11FIP5
Arhgef17|Chr7:100816088-100816587	Chr11:73428079-73428498	Chr11-73422831-73428170	Chr11:73422831-73428170	ARHGEF17
Cdipt|Chr7:126704008-126704507	Chr16:30183852-30184328	Chr16-30182223-30188490	Chr16:30182223-30188490	CDIPT
Tmem219|Chr7:127104422-127104921	Chr16:29700432-29700774	Chr16-29700285-29701112	Chr16:29700285-29701112	TMEM219
Stk32c|Chr7:139234862-139235361	Chr10:132360770-132361163	Chr10-132360753-132361318	Chr10:132360753-132361318	STK32C
Ppp1r14a|Chr7:28930627-28931126	Chr19:38684266-38685283	Chr19-38683048-38687231	Chr19:38683048-38687231	PPP1R14A
Mtmr10|Chr7:63951103-63951602	Chr15:31317687-31318205	Chr15-31315333-31320860	Chr15:31315333-31320860	MTMR10
Nudt21|Chr8:94266266-94266765	Chr16:56781260-56781764	Chr16-56778781-56782375	Chr16:56778781-56782375	NUDT21
Kifc3|Chr8:94811684-94812183	Chr16:57415682-57416229	Chr16-57414730-57419777	Chr16:57414730-57419777	KIFC3
Pcsk7|Chr9:46314389-46314888	Chr11:116732682-116733216	Chr11-116729404-116733650	Chr11:116729404-116733650	PCSK7
Zic1|Chr9:91381302-91381801	Chr3:147393496-147393988	Chr3-147390560-147395177	Chr3:147390560-147395177	ZIC1
Gpm6b|ChrX:166173691-166174190	ChrX:14026083-14026611	ChrX-14024042-14033385	ChrX:14024042-14033385	GPM6B
Zdhhc9|ChrX:48285145-48285644	ChrX:129931981-129932482	ChrX-129930671-129937180	ChrX:129930671-129937180	ZDHHC9
Slc35e3|Chr10:118103090-118103589	Chr12:68365099-68365727	Chr12-68364928-68365655	Chr12:68364928-68365655	SLC35E3
Pip4k2c|Chr10:127661996-127662495	Chr12:57093859-57094386	Chr12-57085415-57094904	Chr12:57085415-57094904	PIP4K2C
Ormdl2|Chr10:128536151-128536650	Chr12:56126097-56126662	Chr12-56125244-56131156	Chr12:56125244-56131156	ORMDL2
Fyn|Chr10:39520238-39520737	Chr6:111709873-111710389	Chr6-111709161-111716413	Chr6:111709161-111716413	FYN
Mcm9|Chr10:53528314-53528813	Chr6:118800367-118800963	Chr6-118799895-118802209	Chr6:118799895-118802209	MCM9
Tspan15|Chr10:62055337-62055836	Chr10:69716869-69717351	Chr10-69716724-69717375	Chr10:69716724-69717375	TSPAN15
Tspan15|Chr10:62182956-62183455	Chr10:69515668-69516091	Chr10-69515390-69517251	Chr10:69515390-69517251	TSPAN15
Ddx21|Chr10:62294014-62294513	Chr10:69375358-69375858	Chr10-69375213-69376392	Chr10:69375213-69376392	DDX21
Gstt2|Chr10:75704044-75704543	Chr22:24107707-24108207	Chr22-24101204-24108847	Chr22:24101204-24108847	GSTT2B
Gucd1|Chr10:75704044-75704543	Chr22:24107707-24108207	Chr22-24101204-24108847	Chr22:24101204-24108847	GUCD1
Ginm1|Chr10:7605092-7605591	Chr6:149831285-149831628	Chr6-149829858-149833219	Chr6:149829858-149833219	GINM1
Sumo3|Chr10:77506923-77507422	Chr21:44958588-44959006	Chr21-44957678-44960149	Chr21:44957678-44960149	SUMO3
Abca7|Chr10:80357807-80358306	Chr19:1525077-1525659	Chr19-1521155-1525955	Chr19:1521155-1525955	ABCA7
Abhd17a|Chr10:80747326-80747825	Chr19:2156020-2156340	Chr19-2148753-2157062	Chr19:2148753-2157062	ABHD17A
Lmnb2|Chr10:80784813-80785312	Chr19:2213610-2214251	Chr19-2212465-2215435	Chr19:2212465-2215435	LMNB2
Chst11|Chr10:83182449-83182948	Chr12:104740419-104741084	Chr12-104735476-104743765	Chr12:104735476-104743765	CHST11
Ikbip|Chr10:91170481-91170980	Chr12:98516202-98516772	Chr12-98513706-98517523	Chr12:98513706-98517523	IKBIP
Tmpo|Chr10:91271107-91271606	Chr12:98397447-98398964	Chr12-98396860-98398254	Chr12:98396860-98398254	TMPO
Eif1|Chr11:100407991-100408490	Chr17:41801407-41801974	Chr17-41800358-41804046	Chr17:41800358-41804046	EIF1
Rab5c|Chr11:100626541-100627040	Chr17:42024195-42025032	Chr17-42022969-42026197	Chr17:42022969-42026197	RAB5C
Cntnap1|Chr11:100761667-100762166	Chr17:42184024-42184529	Chr17-42182733-42186612	Chr17:42182733-42186612	CNTNAP1
Tubg2|Chr11:100761667-100762166	Chr17:42184024-42184529	Chr17-42182733-42186612	Chr17:42182733-42186612	TUBG2
Kat2a|Chr11:100893331-100893830	Chr17:42322555-42323205	Chr17-42321720-42325480	Chr17:42321720-42325480	KAT2A
Mpp3|Chr11:101937004-101937503	Chr17:43713432-43713903	Chr17-43713468-43714618	Chr17:43713468-43714618	MPP3
Mpp3|Chr11:102026753-102027252	Chr17:43832976-43833607	Chr17-43830965-43834342	Chr17:43830965-43834342	MPP3
Ube2o|Chr11:116885145-116885644	Chr17:76816642-76816977	Chr17-76816436-76816926	Chr17:76816436-76816926	UBE2O
Jmjd6|Chr11:117028892-117029391	Chr17:77036834-77037387	Chr17-77036442-77037770	Chr17:77036442-77037770	JMJD6
Zpbp|Chr11:11820098-11820597	Chr7:50467942-50468397	Chr7-50467085-50469006	Chr7:50467085-50469006	ZPBP
Cep68|Chr11:19830579-19831078	Chr2:65553407-65553706	Chr2-65553178-65553981	Chr2:65553178-65553981	CEP68
Lgalsl|Chr11:20400703-20401202	Chr2:64917687-64918197	Chr2-64916736-64919521	Chr2:64916736-64919521	LGALSL
Lgalsl|Chr11:20631166-20631665	Chr2:64654193-64654801	Chr2-64651709-64656285	Chr2:64651709-64656285	LGALSL
Tmem163|Chr1:127496666-127497165	Chr2:134460450-134460771	Chr2-134460090-134462417	Chr2:134460090-134462417	TMEM163
Etnk2|Chr1:133736139-133736638	Chr1:203702056-203702634	Chr1-203701506-203702745	Chr1:203701506-203702745	ETNK2
Cyb5r1|Chr1:134045850-134046349	Chr1:203342598-203343046	Chr1-203338003-203343229	Chr1:203338003-203343229	CYB5R1
Btg2|Chr1:134151505-134152004	Chr1:203216267-203216707	Chr1-203214568-203217327	Chr1:203214568-203217327	BTG2
Slu7|Chr11:43263800-43264299	Chr5:160560404-160561162	Chr5-160559805-160561063	Chr5:160559805-160561063	SLU7
Cyfip2|Chr11:46091278-46091777	Chr5:157540142-157540496	Chr5-157540387-157542076	Chr5:157540387-157542076	CYFIP2
Rasgef1c|Chr11:49918495-49918994	Chr5:180194207-180194694	Chr5-180191558-180199089	Chr5:180191558-180199089	RASGEF1C
Jade2|Chr11:52297264-52297763	Chr5:134101950-134102375	Chr5-134098612-134103715	Chr5:134098612-134103715	JADE2
Stx6|Chr1:155281379-155281878	Chr1:180881811-180882338	Chr1-180881536-180882713	Chr1:180881536-180882713	STX6
Lrrc75a|Chr11:62494541-62495040	Chr17:16285846-16286239	Chr17-16285753-16288058	Chr17:16285753-16288058	LRRC75A
Pigl|Chr11:62494541-62495040	Chr17:16285846-16286239	Chr17-16285753-16288058	Chr17:16285753-16288058	PIGL
Ube2w|Chr1:16518842-16519341	Chr8:73746162-73746975	Chr8-73745323-73749140	Chr8:73745323-73749140	UBE2W
Creg1|Chr1:165610305-165610804	Chr1:167763735-167764305	Chr1-167761316-167764680	Chr1:167761316-167764680	CREG1
Creg1|Chr1:165736007-165736506	Chr1:167600114-167600691	Chr1-167600100-167602224	Chr1:167600100-167602224	CREG1
Zkscan6|Chr11:65745628-65746127	Chr17:12069544-12070012	Chr17-12066735-12074003	Chr17:12066735-12074003	ZNF18
Aldh9a1|Chr1:167447991-167448490	Chr1:165561435-165562015	Chr1-165560705-165561713	Chr1:165560705-165561713	ALDH9A1
Uck2|Chr1:167644793-167645292	Chr1:165392823-165393340	Chr1-165392616-165393741	Chr1:165392616-165393741	UCK2
Chd3|Chr11:69364814-69365313	Chr17:7889139-7889653	Chr17-7884570-7890253	Chr17:7884570-7890253	CHD3
Senp3|Chr11:69390294-69390793	Chr17:7862439-7863020	Chr17-7862384-7863234	Chr17:7862384-7863234	SENP3
Trp53|Chr11:69613869-69614368	Chr17:7633752-7634750	Chr17-7632042-7637183	Chr17:7632042-7637183	TP53
Pelp1|Chr11:70520048-70520547	Chr17:4789836-4790339	Chr17-4785020-4791645	Chr17:4785020-4791645	PELP1
Nup88|Chr11:71406711-71407210	Chr17:5665029-5665310	Chr17-5665035-5665699	Chr17:5665035-5665699	NUP88
Rtn4rl1|Chr11:75139345-75139844	Chr17:2085240-2085748	Chr17-2083127-2086455	Chr17:2083127-2086455	RTN4RL1
Smyd4|Chr11:75402121-75402620	Chr17:1783943-1784457	Chr17-1782247-1784602	Chr17:1782247-1784602	SMYD4
Zfp207|Chr11:80335562-80336061	Chr17:32303037-32303547	Chr17-32303007-32304427	Chr17:32303007-32304427	ZNF207
Aida|Chr1:183442040-183442539	Chr1:222455055-222455585	Chr1-222454522-222455939	Chr1:222454522-222455939	AIDA
Brox|Chr1:183442040-183442539	Chr1:222455055-222455585	Chr1-222454522-222455939	Chr1:222454522-222455939	BROX
Tubd1|Chr11:86894088-86894587	Chr17:59440751-59441243	Chr17-59433961-59441599	Chr17:59433961-59441599	TUBD1
Rps6kb1|Chr11:86898296-86898795	Chr17:59436886-59437260	Chr17-59433961-59441599	Chr17:59433961-59441599	RPS6KB1
Scpep1|Chr11:88728403-88728902	Chr17:57243069-57243627	Chr17-57242074-57243929	Chr17:57242074-57243929	SCPEP1
Itga3|Chr11:95106820-95107319	Chr17:50026839-50027244	Chr17-50026591-50028019	Chr17:50026591-50028019	ITGA3
Cisd3|Chr11:97899766-97900265	Chr17:38983082-38983475	Chr17-38983070-38983725	Chr17:38983070-38983725	CISD3
Cisd3|Chr11:98002561-98003060	Chr17:39174853-39175355	Chr17-39173384-39175851	Chr17:39173384-39175851	CISD3
Lasp1|Chr11:98002561-98003060	Chr17:39174853-39175355	Chr17-39173384-39175851	Chr17:39173384-39175851	LASP1
Plxdc1|Chr11:98035819-98036318	Chr17:39209618-39210089	Chr17-39206560-39210666	Chr17:39206560-39210666	PLXDC1
Mien1|Chr11:98721381-98721880	Chr17:40038496-40039178	Chr17-40038603-40039589	Chr17:40038603-40039589	MIEN1
Krt10|Chr11:98981550-98982049	Chr17:40362203-40362784	Chr17-40362449-40363982	Chr17:40362449-40363982	KRT10
Krt10|Chr11:99142421-99142920	Chr17:40551946-40552431	Chr17-40550702-40556180	Chr17:40550702-40556180	KRT10
Wars|Chr12:108605516-108606015	Chr14:100019179-100019691	Chr14-100017708-100023358	Chr14:100017708-100023358	WARS
Iah1|Chr12:21542986-21543485	Chr2:9843157-9843712	Chr2-9842676-9844874	Chr2:9842676-9844874	IAH1
Myt1l|Chr12:29279537-29280036	Chr2:2639988-2640828	Chr2-2639396-2640120	Chr2:2639396-2640120	MYT1L
Dus4l|Chr12:31895820-31896319	Chr7:107234366-107235022	Chr7-107232754-107234885	Chr7:107232754-107234885	DUS4L
Srp54a|Chr12:55343929-55344428	Chr14:35192523-35193327	Chr14-35192671-35193637	Chr14:35192671-35193637	SRP54
L3hypdh|Chr12:72285232-72285731	Chr14:59707496-59708077	Chr14-59707563-59708652	Chr14:59707563-59708652	L3HYPDH
Zbtb1|Chr12:76081613-76082112	Chr14:64196744-64197233	Chr14-64195204-64201433	Chr14:64195204-64201433	ZBTB1
Zbtb25|Chr12:76496232-76496731	Chr14:64671540-64671859	Chr14-64671275-64674176	Chr14:64671275-64674176	ZBTB25
Smoc1|Chr12:80736566-80737065	Chr14:69543740-69544071	Chr14-69543615-69544156	Chr14:69543615-69544156	SMOC1
Hs1bp3|Chr12:8320022-8320521	Chr2:20642351-20642876	Chr2-20640032-20644257	Chr2:20640032-20644257	HS1BP3
Zfyve1|Chr12:83277708-83278207	Chr14:72679389-72679911	Chr14-72678828-72681248	Chr14:72678828-72681248	ZFYVE1
Aldh6a1|Chr12:84653864-84654363	Chr14:74362242-74362759	Chr14-74362116-74363266	Chr14:74362116-74363266	ALDH6A1
Abcd4|Chr12:84752664-84753163	Chr14:74476526-74477282	Chr14-74476094-74477087	Chr14:74476094-74477087	ABCD4
Jdp2|Chr12:85305403-85305902	Chr14:75088463-75088959	Chr14-75088309-75089505	Chr14:75088309-75089505	JDP2
Irf2bpl|Chr12:86795760-86796259	Chr14:76913518-76913930	Chr14-76912097-76914647	Chr14:76912097-76914647	IRF2BPL
Tmed8|Chr12:86859671-86860170	Chr14:77000099-77000558	Chr14-76998884-77001504	Chr14:76998884-77001504	TMED8
Zdhhc22|Chr12:87107503-87108002	Chr14:77275605-77276123	Chr14-77274646-77276757	Chr14:77274646-77276757	ZDHHC22
Tdp2|Chr13:24521384-24521883	Chr6:25015117-25015718	Chr6-25015109-25015683	Chr6:25015109-25015683	TDP2
Serpinb6a|Chr13:34046315-34046814	Chr6:3126231-3127270	Chr6-3125766-3127335	Chr6:3125766-3127335	SERPINB6
Psmg4|Chr13:34095983-34096482	Chr6:3194578-3195014	Chr6-3192399-3197145	Chr6:3192399-3197145	PSMG4
Sirt5|Chr13:43525676-43526175	Chr6:13762654-13763128	Chr6-13762290-13763397	Chr6:13762290-13763397	SIRT5
Dek|Chr13:47193616-47194115	Chr6:18387095-18387625	Chr6-18386201-18389969	Chr6:18386201-18389969	DEK
Rnf144b|Chr13:47209097-47209596	Chr6:18401219-18401661	Chr6-18400685-18401536	Chr6:18400685-18401536	RNF144B
B4galt7|Chr13:55483531-55484030	Chr5:177468981-177469500	Chr5-177468796-177471205	Chr5:177468796-177471205	B4GALT7
Klf6|Chr13:6330283-6330782	Chr10:3331208-3331709	Chr10-3330644-3331675	Chr10:3330644-3331675	KLF6
Adamts16|Chr13:70643612-70644111	Chr5:5419180-5419578	Chr5-5419132-5419937	Chr5:5419132-5419937	ADAMTS16
Mtx3|Chr13:92986664-92987163	Chr5:79857967-79858628	Chr5-79857722-79858632	Chr5:79857722-79858632	MTX3
Ndst2|Chr14:20576066-20576565	Chr10:73529509-73529772	Chr10-73527992-73535133	Chr10:73527992-73535133	NDST2
Ndst2|Chr14:20803473-20803972	Chr10:73885976-73886495	Chr10-73885818-73889507	Chr10:73885818-73889507	NDST2
Arhgef3|Chr14:27050765-27051264	Chr3:57151725-57152344	Chr3-57150150-57153208	Chr3:57150150-57153208	ARHGEF3
Apex1|Chr14:50944209-50944708	Chr14:20469050-20469654	Chr14-20468276-20471186	Chr14:20468276-20471186	APEX1
Gmpr2|Chr14:55518842-55519341	Chr14:24079556-24080033	Chr14-24079202-24083142	Chr14:24079202-24083142	GMPR2
Dhrs1|Chr14:55863739-55864238	Chr14:24408658-24409151	Chr14-24408552-24409262	Chr14:24408552-24409262	DHRS1
Trim13|Chr14:61498139-61498638	Chr13:49848121-49848408	Chr13-49847721-49848452	Chr13:49847721-49848452	TRIM13
Rnaseh2b|Chr14:62251901-62252400	Chr13:50801288-50801699	Chr13-50799204-50802188	Chr13:50799204-50802188	RNASEH2B
Kctd9|Chr14:67993097-67993596	Chr8:25065378-25065952	Chr8-25065481-25065984	Chr8:25065481-25065984	KCTD9
Chmp7|Chr14:69830536-69831035	Chr8:22974080-22974526	Chr8-22972354-22976630	Chr8:22972354-22976630	CHMP7
Chmp7|Chr14:70021098-70021597	Chr8:22756275-22756713	Chr8-22755946-22758273	Chr8:22755946-22758273	CHMP7
Fam160b2|Chr14:70470167-70470666	Chr8:22216909-22217679	Chr8-22216165-22217265	Chr8:22216165-22217265	FAM160B2
Rcbtb2|Chr14:72983357-72983856	Chr13:48749733-48750247	Chr13-48748804-48751752	Chr13:48748804-48751752	RCBTB2
Slc25a30|Chr14:75829337-75829836	Chr13:45371097-45371462	Chr13-45370550-45372646	Chr13:45370550-45372646	SLC25A30
Slc25a30|Chr14:75876240-75876739	Chr13:45309378-45310319	Chr13-45309032-45312595	Chr13:45309032-45312595	SLC25A30
Gpalpp1|Chr14:75899449-75899948	Chr13:45281012-45281358	Chr13-45277942-45282017	Chr13:45277942-45282017	GPALPP1
Nufip1|Chr14:75899449-75899948	Chr13:45281012-45281358	Chr13-45277942-45282017	Chr13:45277942-45282017	NUFIP1
Gpalpp1|Chr14:76254912-76255411	Chr13:44806785-44807297	Chr13-44806599-44807345	Chr13:44806599-44807345	GPALPP1
Dazap2|Chr15:100682952-100683451	Chr12:51341309-51341811	Chr12-51340914-51342740	Chr12:51340914-51342740	DAZAP2
Calcoco1|Chr15:102788776-102789275	Chr12:53795866-53796358	Chr12-53795566-53801293	Chr12:53795566-53801293	CALCOCO1
Ywhaz|Chr15:36979798-36980297	Chr8:101172627-101173185	Chr8-101171817-101173908	Chr8:101171817-101173908	YWHAZ
Slc25a32|Chr15:39361967-39362466	Chr8:103796553-103797145	Chr8-103796463-103797406	Chr8:103796463-103797406	SLC25A32
Gpt|Chr15:76307094-76307593	Chr8:144060466-144060950	Chr8-144056507-144065141	Chr8:144056507-144065141	GPT
Ift27|Chr15:77857549-77858048	Chr22:36409842-36410455	Chr22-36409915-36410604	Chr22:36409915-36410604	IFT27
Myh9|Chr15:77982101-77982600	Chr22:36546100-36546731	Chr22-36545910-36547044	Chr22:36545910-36547044	MYH9
Pick1|Chr15:79270234-79270733	Chr22:38096657-38097311	Chr22-38097164-38098541	Chr22:38097164-38098541	PICK1
Tab1|Chr15:80024284-80024783	Chr22:39253416-39253937	Chr22-39252822-39256727	Chr22:39252822-39256727	TAB1
Chadl|Chr15:81301980-81302479	Chr22:40759841-40760507	Chr22-40760149-40760679	Chr22:40760149-40760679	CHADL
Pnpla3|Chr15:84212134-84212633	Chr22:43993290-43993633	Chr22-43992135-43996613	Chr22:43992135-43996613	PNPLA3
Phf21b|Chr15:84654129-84654628	Chr22:44658149-44658770	Chr22-44658139-44659982	Chr22:44658139-44659982	PHF21B
Phf21b|Chr15:84815081-84815580	Chr22:44931383-44931890	Chr22-44930013-44932014	Chr22:44930013-44932014	PHF21B
Fam118a|Chr15:84842447-84842946	Chr22:44995038-44995526	Chr22-44994278-44995710	Chr22:44994278-44995710	FAM118A
Sumo1|Chr1:59574769-59575268	Chr2:202123308-202123830	Chr2-202121561-202123559	Chr2:202121561-202123559	SUMO1
Rnd1|Chr15:98699357-98699856	Chr12:48890606-48891192	Chr12-48890033-48891788	Chr12:48890033-48891788	RND1
Lmbr1l|Chr15:99265624-99266123	Chr12:49580292-49580807	Chr12-49579955-49581327	Chr12:49579955-49581327	LMBR1L
Tuba1a|Chr15:99343259-99343758	Chr12:49673282-49673808	Chr12-49669237-49676678	Chr12:49669237-49676678	TUBA1A
Mcrs1|Chr15:99688703-99689202	Chr12:50070408-50070912	Chr12-50067605-50076256	Chr12:50067605-50076256	MCRS1
Txnrd2|Chr16:18211714-18212213	Chr22:20156944-20157383	Chr22-20153831-20158881	Chr22:20153831-20158881	TXNRD2
Vps8|Chr16:21332986-21333485	Chr3:184711436-184712188	Chr3-184710361-184713068	Chr3:184710361-184713068	VPS8
Etv5|Chr16:22517632-22518131	Chr3:186209897-186210412	Chr3-186206121-186213763	Chr3:186206121-186213763	ETV5
Acap2|Chr16:30977149-30977648	Chr3:195106121-195106820	Chr3-195105637-195107152	Chr3:195105637-195107152	ACAP2
Gtf2e1|Chr16:37567067-37567566	Chr3:120693965-120694551	Chr3-120691299-120694584	Chr3:120691299-120694584	GTF2E1
B4galt4|Chr16:38673376-38673875	Chr3:119329579-119330087	Chr3-119328306-119333248	Chr3:119328306-119333248	B4GALT4
Ubald1|Chr16:4550929-4551428	Chr16:4261640-4261977	Chr16-4260567-4262170	Chr16:4260567-4262170	UBALD1
Itsn1|Chr16:91962482-91962981	Chr21:33947773-33948209	Chr21-33946750-33950045	Chr21:33946750-33950045	ITSN1
Ets2|Chr16:95769620-95770119	Chr21:38913300-38913991	Chr21-38912826-38913796	Chr21:38912826-38913796	ETS2
Rps2|Chr17:24455072-24455571	Chr16:2223364-2223849	Chr16-2219738-2225919	Chr16:2219738-2225919	RPS2
Rpusd1|Chr17:25456502-25457001	Chr16:1125491-1125936	Chr16-1123942-1126291	Chr16:1123942-1126291	RPUSD1
BC004004|Chr17:29176546-29177045	Chr6:36765787-36766271	Chr6-36763747-36773351	Chr6:36763747-36773351	C6orf89
Ppil1|Chr17:29396809-29397308	Chr6:37051366-37051859	Chr6-37048841-37052740	Chr6:37048841-37052740	PPIL1
Atf6b|Chr17:34295972-34296471	Chr6:32609817-32610297	Chr6-32609362-32610520	Chr6:32609362-32610520	ATF6B
Gtf2h4|Chr17:35725503-35726002	Chr6:30828420-30828968	Chr6-30827164-30831317	Chr6:30827164-30831317	GTF2H4
Dnpep|Chr1:74880698-74881197	Chr2:218979955-218980508	Chr2-218979767-218981200	Chr2:218979767-218981200	DNPEP
Zfp142|Chr1:74880698-74881197	Chr2:218979955-218980508	Chr2-218979767-218981200	Chr2:218979767-218981200	ZNF142
Dnpep|Chr1:74882116-74882615	Chr2:218981707-218982209	Chr2-218981668-218982117	Chr2:218981668-218982117	DNPEP
Ankzf1|Chr1:75263144-75263643	Chr2:219308310-219308820	Chr2-219308069-219309742	Chr2:219308069-219309742	ANKZF1
Cnppd1|Chr1:75342781-75343280	Chr2:219402938-219403366	Chr2-219402694-219403362	Chr2:219402694-219403362	CNPPD1
Dnpep|Chr1:75467473-75467972	Chr2:219530014-219530533	Chr2-219529370-219530952	Chr2:219529370-219530952	DNPEP
Dus3l|Chr17:56814222-56814721	Chr19:6066518-6066997	Chr19-6065644-6067843	Chr19:6065644-6067843	DUS3L
Gtf2f1|Chr17:56814222-56814721	Chr19:6066518-6066997	Chr19-6065644-6067843	Chr19:6065644-6067843	GTF2F1
Efna5|Chr17:62882719-62883218	Chr5:107672191-107672708	Chr5-107668981-107674147	Chr5:107668981-107674147	EFNA5
Taf4b|Chr18:15150058-15150557	Chr18:26655883-26656395	Chr18-26648940-26658542	Chr18:26648940-26658542	TAF4B
Kdm3b|Chr18:34808944-34809443	Chr5:138391716-138392215	Chr5-138390954-138393667	Chr5:138390954-138393667	KDM3B
Pcdhb19|Chr18:37217177-37217676	Chr5:141040108-141040584	Chr5-141039587-141041956	Chr5:141039587-141041956	PCDHB12
Fchsd1|Chr18:37907974-37908473	Chr5:141592069-141592430	Chr5-141591813-141592480	Chr5:141591813-141592480	FCHSD1
Gnpda1|Chr18:37907974-37908473	Chr5:141592069-141592430	Chr5-141591813-141592480	Chr5:141591813-141592480	GNPDA1
Lars|Chr18:42601610-42602109	Chr5:146542175-146542685	Chr5-146541987-146542720	Chr5:146541987-146542720	LARS
Cdo1|Chr18:46559035-46559534	Chr5:115579202-115579815	Chr5-115578738-115580134	Chr5:115578738-115580134	CDO1
Mppe1|Chr18:67133789-67134288	Chr18:11752397-11752928	Chr18-11751380-11752859	Chr18:11751380-11752859	MPPE1
Sh3bp4|Chr1:88924147-88924646	Chr2:234770079-234770600	Chr2-234769711-234771176	Chr2:234769711-234771176	SH3BP4
Tmem216|Chr19:10272772-10273271	Chr11:61718395-61718900	Chr11-61715135-61720350	Chr11:61715135-61720350	TMEM216
Myrf|Chr19:10502547-10503046	Chr11:61446023-61446635	Chr11-61444164-61449053	Chr11:61444164-61449053	MYRF
Rpp30|Chr19:36440064-36440563	Chr10:91251357-91251770	Chr10-91247369-91252224	Chr10:91247369-91252224	RPP30
Ppp1ca|Chr19:4206948-4207447	Chr11:67382454-67382957	Chr11-67380873-67385880	Chr11:67380873-67385880	PPP1CA
Morn4|Chr19:42315875-42316374	Chr10:97914663-97915213	Chr10-97913661-97918661	Chr10:97913661-97918661	MORN4
Cutc|Chr19:43478816-43479315	Chr10:99370827-99371354	Chr10-99370943-99371274	Chr10:99370943-99371274	CUTC
Lzts2|Chr19:45302534-45303033	Chr10:101292988-101293487	Chr10-101290127-101296312	Chr10:101290127-101296312	LZTS2
Lzts2|Chr19:45310853-45311352	Chr10:101303136-101303680	Chr10-101301372-101306060	Chr10:101301372-101306060	LZTS2
Sfxn2|Chr19:46528285-46528784	Chr10:102673755-102674256	Chr10-102672124-102680107	Chr10:102672124-102680107	SFXN2
Rbm20|Chr19:53852561-53853060	Chr10:110822595-110823070	Chr10-110822084-110823728	Chr10:110822084-110823728	RBM20
Trpt1|Chr19:6577078-6577577	Chr11:64553316-64553906	Chr11-64553225-64556066	Chr11:64553225-64556066	TRPT1
Cat|Chr2:103871857-103872356	Chr11:33970955-33971471	Chr11-33970965-33971509	Chr11:33970965-33971509	CAT
Pfkfb3|Chr2:11288372-11288871	Chr10:6445670-6446180	Chr10-6445063-6447212	Chr10:6445063-6447212	PFKFB3
Pak6|Chr2:118638018-118638517	Chr15:40217020-40217609	Chr15-40217102-40217792	Chr15:40217102-40217792	PAK6
Vps18|Chr2:118976225-118976724	Chr15:40511355-40511879	Chr15-40510466-40512871	Chr15:40510466-40512871	VPS18
Tyro3|Chr2:119873047-119873546	Chr15:41621744-41622271	Chr15-41618923-41624295	Chr15:41618923-41624295	TYRO3
Vps39|Chr2:120011394-120011893	Chr15:41811570-41811909	Chr15-41809476-41813168	Chr15:41809476-41813168	VPS39
Tyro3|Chr2:120076005-120076504	Chr15:41881891-41882259	Chr15-41881174-41883684	Chr15:41881174-41883684	TYRO3
Sord|Chr2:122375417-122375916	Chr15:45198540-45199068	Chr15-45197140-45203887	Chr15:45197140-45203887	SORD
Cep152|Chr2:125684720-125685219	Chr15:48896955-48897470	Chr15-48894912-48898978	Chr15:48894912-48898978	CEP152
Stk35|Chr2:129674808-129675307	Chr20:1965727-1966081	Chr20-1963699-1966606	Chr20:1963699-1966606	STK35
Stk35|Chr2:129864906-129865405	Chr20:2162555-2162965	Chr20-2162408-2163186	Chr20:2162408-2163186	STK35
Rassf2|Chr2:131820007-131820506	Chr20:4607169-4607962	Chr20-4606064-4610071	Chr20:4606064-4610071	RASSF2
Arl5b|Chr2:14873614-14874113	Chr10:18400801-18401269	Chr10-18399974-18401235	Chr10:18399974-18401235	ARL5B
Tbc1d20|Chr2:151876045-151876544	Chr20:956297-956971	Chr20-956191-956906	Chr20:956191-956906	TBC1D20
Dusp15|Chr2:152696685-152697184	Chr20:31562687-31563330	Chr20-31561835-31565267	Chr20:31561835-31565267	DUSP15
Mapre1|Chr2:153560717-153561216	Chr20:32627104-32627643	Chr20-32625696-32629565	Chr20:32625696-32629565	MAPRE1
Zfp341|Chr2:154682961-154683460	Chr20:33841028-33841561	Chr20-33838042-33841726	Chr20:33838042-33841726	ZNF341
Eif6|Chr2:155962941-155963440	Chr20:35463616-35464118	Chr20-35462985-35464361	Chr20:35462985-35464361	EIF6
Phf20|Chr2:155962941-155963440	Chr20:35463616-35464118	Chr20-35462985-35464361	Chr20:35462985-35464361	PHF20
Ift52|Chr2:163204191-163204690	Chr20:43915866-43916371	Chr20-43914327-43917355	Chr20:43914327-43917355	IFT52
Oser1|Chr2:163401121-163401620	Chr20:44190138-44190735	Chr20-44190134-44190761	Chr20:44190134-44190761	OSER1
Rims4|Chr2:163685668-163686167	Chr20:44572425-44572937	Chr20-44570750-44574218	Chr20:44570750-44574218	RIMS4
Stk4|Chr2:163968509-163969008	Chr20:44867001-44867974	Chr20-44867383-44868173	Chr20:44867383-44868173	STK4
Acot8|Chr2:165076876-165077375	Chr20:46135851-46136400	Chr20-46135775-46136681	Chr20:46135775-46136681	ACOT8
Ddx27|Chr2:166818387-166818886	Chr20:48929102-48929851	Chr20-48928567-48929993	Chr20:48928567-48929993	DDX27
Ddx27|Chr2:167144317-167144816	Chr20:49432644-49433211	Chr20-49432445-49433828	Chr20:49432445-49433828	DDX27
Gnas|Chr2:174025402-174025901	Chr20:58623758-58624202	Chr20-58623458-58624713	Chr20:58623458-58624713	GNAS
Msrb2|Chr2:19276144-19276643	Chr10:22988718-22989259	Chr10-22980679-22989615	Chr10:22980679-22989615	MSRB2
Snapc4|Chr2:26055011-26055510	Chr9:136005790-136006512	Chr9-135999994-136006569	Chr9:135999994-136006569	SNAPC4
Slc27a4|Chr2:29764782-29765281	Chr9:128295255-128295838	Chr9-128294393-128296869	Chr9:128294393-128296869	SLC27A4
Kyat1|Chr2:30613471-30613970	Chr9:129351025-129351691	Chr9-129350134-129354253	Chr9:129350134-129354253	KYAT1
Rbm18|Chr2:36021494-36021993	Chr9:122131200-122131719	Chr9-122131267-122132028	Chr9:122131267-122132028	RBM18
Psmb7|Chr2:38592011-38592510	Chr9:124357991-124358607	Chr9-124352028-124358905	Chr9:124352028-124358905	PSMB7
Celf1|Chr2:90866456-90866955	Chr11:47616919-47617495	Chr11-47616922-47617507	Chr11:47616922-47617507	CELF1
Ptpmt1|Chr2:91194478-91194977	Chr11:47257792-47258332	Chr11-47256560-47260439	Chr11:47256560-47260439	PTPMT1
Mapk8ip1|Chr2:92183532-92184031	Chr11:46121238-46121759	Chr11-46116015-46123349	Chr11:46116015-46123349	MAPK8IP1
Prdm11|Chr2:92839912-92840411	Chr11:45371143-45371584	Chr11-45370806-45372275	Chr11:45370806-45372275	PRDM11
Prdm11|Chr2:93313708-93314207	Chr11:44761451-44762009	Chr11-44761399-44762046	Chr11:44761399-44762046	PRDM11
Kcna2|Chr3:107159925-107160424	Chr1:110555302-110555756	Chr1-110554620-110558621	Chr1:110554620-110558621	KCNA2
Strip1|Chr3:107205939-107206438	Chr1:110495955-110496464	Chr1-110494903-110496733	Chr1:110494903-110496733	STRIP1
Sass6|Chr3:116835894-116836393	Chr1:99808745-99809204	Chr1-99808230-99809431	Chr1:99808230-99809431	SASS6
Rwdd3|Chr3:121104754-121105253	Chr1:95308908-95309422	Chr1-95308336-95310054	Chr1:95308336-95310054	RWDD3
Bcl10|Chr3:146184844-146185343	Chr1:84936197-84936695	Chr1-84935911-84936683	Chr1:84935911-84936683	BCL10
Ssx2ip|Chr3:146184844-146185343	Chr1:84936197-84936695	Chr1-84935911-84936683	Chr1:84935911-84936683	SSX2IP
Gipc2|Chr3:152315571-152316070	Chr1:77825352-77825740	Chr1-77824313-77825681	Chr1:77824313-77825681	GIPC2
Maml3|Chr3:51749023-51749522	Chr4:139783177-139783793	Chr4-139781575-139787359	Chr4:139781575-139787359	MAML3
Rab33b|Chr3:51749023-51749522	Chr4:139783177-139783793	Chr4-139781575-139787359	Chr4:139781575-139787359	RAB33B
Maml3|Chr3:51749682-51750181	Chr4:139783954-139784432	Chr4-139781575-139787359	Chr4:139781575-139787359	MAML3
Siah2|Chr3:59120431-59120930	Chr3:151227687-151228129	Chr3-151227410-151229118	Chr3:151227410-151229118	SIAH2
Msto1|Chr3:89089753-89090252	Chr1:155324147-155324858	Chr1-155319623-155327022	Chr1:155319623-155327022	MSTO1
Pygo2|Chr3:89510944-89511443	Chr1:154879541-154880029	Chr1-154877708-154879635	Chr1:154877708-154879635	PYGO2
Ube2q1|Chr3:89647606-89648105	Chr1:154730042-154730591	Chr1-154730194-154732741	Chr1:154730194-154732741	UBE2Q1
Zbtb10|Chr3:9346901-9347400	Chr8:80578069-80578605	Chr8-80577518-80579955	Chr8:80577518-80579955	ZBTB10
Cc2d1b|Chr4:108338740-108339239	Chr1:52686883-52687456	Chr1-52685916-52686985	Chr1:52685916-52686985	CC2D1B
Coa7|Chr4:108359986-108360485	Chr1:52662977-52663856	Chr1-52662775-52663333	Chr1:52662775-52663333	COA7
Eps15|Chr4:109225054-109225553	Chr1:51583489-51584093	Chr1-51581072-51585955	Chr1:51581072-51585955	EPS15
Tmem69|Chr4:116626562-116627061	Chr1:45584487-45584980	Chr1-45580558-45586836	Chr1:45580558-45586836	TMEM69
Ebna1bp2|Chr4:119121285-119121784	Chr1:42941618-42942171	Chr1-42940755-42950652	Chr1:42940755-42950652	EBNA1BP2
P3h1|Chr4:119121285-119121784	Chr1:42941618-42942171	Chr1-42940755-42950652	Chr1:42940755-42950652	P3H1
Ppcs|Chr4:119462827-119463326	Chr1:42421029-42421564	Chr1-42420053-42421676	Chr1:42420053-42421676	PPCS
Rlf|Chr4:120986352-120986851	Chr1:40404729-40405639	Chr1-40403393-40406717	Chr1:40403393-40406717	RLF
Hpcal4|Chr4:123249032-123249531	Chr1:39622995-39623540	Chr1-39622686-39627268	Chr1:39622686-39627268	HPCAL4
C77080|Chr4:129406369-129406868	Chr1:32500742-32501169	Chr1-32499033-32502746	Chr1:32499033-32502746	KIAA1522
Tmem39b|Chr4:129455041-129455540	Chr1:32401009-32401403	Chr1-32399778-32401626	Chr1:32399778-32401626	TMEM39B
Pef1|Chr4:129785100-129785599	Chr1:31963727-31964534	Chr1-31963218-31964868	Chr1:31963218-31964868	PEF1
Snrnp40|Chr4:130188858-130189357	Chr1:31563992-31564538	Chr1-31563971-31564834	Chr1:31563971-31564834	SNRNP40
Lypla2|Chr4:136081621-136082120	Chr1:23619465-23620033	Chr1-23619305-23619953	Chr1:23619305-23619953	LYPLA2
Mul1|Chr4:138537158-138537657	Chr1:20386674-20387283	Chr1-20386285-20387351	Chr1:20386285-20387351	MUL1
Arhgef10l|Chr4:140539081-140539580	Chr1:17661494-17662047	Chr1-17661158-17662205	Chr1:17661158-17662205	ARHGEF10L
Rcc2|Chr4:140547402-140547901	Chr1:17653670-17654266	Chr1-17652800-17654992	Chr1:17652800-17654992	RCC2
Masp2|Chr4:148512921-148513420	Chr1:11158861-11159703	Chr1-11157249-11159056	Chr1:11157249-11159056	MASP2
Pgd|Chr4:148859662-148860161	Chr1:10735219-10735724	Chr1-10734601-10738623	Chr1:10734601-10738623	PGD
Exosc10|Chr4:148922255-148922754	Chr1:10671851-10672315	Chr1-10670858-10672187	Chr1:10670858-10672187	EXOSC10
Plch2|Chr4:155095159-155095658	Chr1:2381680-2382105	Chr1-2380696-2386102	Chr1:2380696-2386102	PLCH2
Dcaf12|Chr4:41390028-41390527	Chr9:34252755-34253250	Chr9-34251411-34256572	Chr9:34251411-34256572	DCAF12
Galt|Chr4:41614041-41614540	Chr9:34500515-34501031	Chr9-34500290-34504365	Chr9:34500290-34504365	GALT
Gba2|Chr4:43711809-43712308	Chr9:35882149-35882670	Chr9-35882186-35882720	Chr9:35882186-35882720	GBA2
Npr2|Chr4:44065611-44066110	Chr9:36247616-36248764	Chr9-36247624-36249171	Chr9:36247624-36249171	NPR2
Zbtb5|Chr4:44970699-44971198	Chr9:37414934-37415630	Chr9-37412376-37416204	Chr9:37412376-37416204	ZBTB5
Slc31a1|Chr4:62761592-62762091	Chr9:113655253-113655859	Chr9-113654332-113658731	Chr9:113654332-113658731	SLC31A1
Slc24a2|Chr4:87057684-87058183	Chr9:19600583-19601696	Chr9-19592911-19602531	Chr9:19592911-19602531	SLC24A2
Tpst2|Chr5:112001940-112002439	Chr22:26952731-26953270	Chr22-26953217-26953827	Chr22:26953217-26953827	TPST2
Usp30|Chr5:114139090-114139589	Chr12:109110741-109111319	Chr12-109108362-109118071	Chr12:109108362-109118071	USP30
Rnft2|Chr5:118331502-118332001	Chr12:116599530-116600075	Chr12-116598994-116600420	Chr12:116598994-116600420	RNFT2
Tpcn1|Chr5:120440641-120441140	Chr12:113462297-113462756	Chr12-113461992-113463686	Chr12:113461992-113463686	TPCN1
Tpcn1|Chr5:120680099-120680598	Chr12:113097629-113098158	Chr12-113096038-113100440	Chr12:113096038-113100440	TPCN1
Atp2a2|Chr5:122627151-122627650	Chr12:110100361-110100647	Chr12-110099336-110104905	Chr12:110099336-110104905	ATP2A2
Gpn3|Chr5:122627151-122627650	Chr12:110100361-110100647	Chr12-110099336-110104905	Chr12:110099336-110104905	GPN3
Anapc5|Chr5:122799015-122799514	Chr12:121326890-121327264	Chr12-121324705-121329927	Chr12:121324705-121329927	ANAPC5
Srrm3|Chr5:135835104-135835603	Chr7:76235121-76235447	Chr7-76233823-76235823	Chr7:76233823-76235823	SRRM3
Tmem120a|Chr5:135855082-135855581	Chr7:76262938-76263394	Chr7-76262681-76263670	Chr7:76262681-76263670	TMEM120A
Eif2ak1|Chr5:143372679-143373178	Chr7:6526584-6527009	Chr7-6525895-6527259	Chr7:6525895-6527259	EIF2AK1
Zfp12|Chr5:143372679-143373178	Chr7:6526584-6527009	Chr7-6525895-6527259	Chr7:6525895-6527259	ZNF12
Mpv17|Chr5:30806067-30806566	Chr2:26961607-26962495	Chr2-26961114-26962518	Chr2:26961114-26962518	MPV17
Hopx|Chr5:76928157-76928656	Chr4:56410301-56410800	Chr4-56409702-56411751	Chr4:56409702-56411751	HOPX
Hopx|Chr5:77459766-77460265	Chr4:57163499-57163988	Chr4-57162981-57165578	Chr4:57162981-57165578	HOPX
Naaa|Chr5:92117760-92118259	Chr4:75708207-75708670	Chr4-75708094-75708907	Chr4:75708094-75708907	NAAA
Bhlhe40|Chr6:108570850-108571349	Chr3:4868161-4868727	Chr3-4866656-4870281	Chr3:4866656-4870281	BHLHE40
Rad18|Chr6:112781229-112781728	Chr3:9064765-9067370	Chr3-9067118-9068459	Chr3:9067118-9068459	RAD18
Rad18|Chr6:112809825-112810324	Chr3:9099065-9099575	Chr3-9096989-9103237	Chr3:9096989-9103237	RAD18
Vhl|Chr6:113891060-113891559	Chr3:10505290-10505934	Chr3-10503212-10508102	Chr3:10503212-10508102	VHL
Atg7|Chr6:114697887-114698386	Chr3:11334989-11335283	Chr3-11334717-11335662	Chr3:11334717-11335662	ATG7
Syn2|Chr6:115043543-115044042	Chr3:11850026-11850359	Chr3-11850013-11850359	Chr3:11850013-11850359	SYN2
Pparg|Chr6:115267808-115268307	Chr3:12175521-12176202	Chr3-12175511-12176319	Chr3:12175511-12176319	PPARG
Lrtm2|Chr6:119328685-119329184	Chr12:1822198-1822703	Chr12-1819572-1822420	Chr12:1819572-1822420	LRTM2
Crebl2|Chr6:135249668-135250167	Chr12:13098049-13098510	Chr12-13097303-13104760	Chr12:13097303-13104760	CREBL2
Crebl2|Chr6:135252570-135253069	Chr12:13101103-13101642	Chr12-13097303-13104760	Chr12:13097303-13104760	CREBL2
H2afj|Chr6:136860899-136861398	Chr12:14845219-14845502	Chr12-14845016-14845892	Chr12:14845016-14845892	H2AFJ
Lrguk|Chr6:34346492-34346991	Chr7:134513102-134513481	Chr7-134513112-134515375	Chr7:134513112-134515375	LRGUK
Creb3l2|Chr6:37434167-37434666	Chr7:137992907-137993439	Chr7-137992208-137994919	Chr7:137992208-137994919	CREB3L2
Ttc26|Chr6:38066157-38066656	Chr7:138738536-138739079	Chr7-138738131-138739443	Chr7:138738131-138739443	TTC26
Wipf3|Chr6:54327540-54328039	Chr7:29564618-29565231	Chr7-29562439-29566960	Chr7:29562439-29566960	WIPF3
St3gal5|Chr6:71823384-71823883	Chr2:86199397-86199920	Chr2-86197270-86203089	Chr2:86197270-86203089	ST3GAL5
Tmem150a|Chr6:72261115-72261614	Chr2:85728889-85729468	Chr2-85727966-85730952	Chr2:85727966-85730952	TMEM150A
Slc41a3|Chr6:90575222-90575721	Chr3:126134284-126134752	Chr3-126133582-126134879	Chr3:126133582-126134879	SLC41A3
Tub|Chr7:109165800-109166299	Chr11:8258705-8259226	Chr11-8255407-8260235	Chr11:8255407-8260235	TUB
Ampd3|Chr7:110630071-110630570	Chr11:10307656-10308167	Chr11-10301967-10310318	Chr11:10301967-10310318	AMPD3
Ctr9|Chr7:110630071-110630570	Chr11:10307656-10308167	Chr11-10301967-10310318	Chr11:10301967-10310318	CTR9
Sox6|Chr7:116132019-116132518	Chr11:16785340-16786063	Chr11-16785094-16786339	Chr11:16785094-16786339	SOX6
Zfp553|Chr7:126941665-126942164	Chr16:29911155-29911745	Chr16-29910639-29912734	Chr16:29910639-29912734	ZNF48
Ppp2r2d|Chr7:139017210-139017709	Chr10:132133053-132133497	Chr10-132130309-132134832	Chr10:132130309-132134832	PPP2R2D
Bet1l|Chr7:141293879-141294378	Chr11:639589-640140	Chr11-635527-645045	Chr11:635527-645045	BET1L
Ric8a|Chr7:141293879-141294378	Chr11:639589-640140	Chr11-635527-645045	Chr11:635527-645045	RIC8A
Ercc1|Chr7:19257232-19257731	Chr19:45526162-45526674	Chr19-45522181-45530040	Chr19:45522181-45530040	ERCC1
Opa3|Chr7:19257232-19257731	Chr19:45526162-45526674	Chr19-45522181-45530040	Chr19:45522181-45530040	OPA3
Qpctl|Chr7:19257232-19257731	Chr19:45526162-45526674	Chr19-45522181-45530040	Chr19:45522181-45530040	QPCTL
Zfp607b|Chr7:27490387-27490886	Chr19:40421134-40421613	Chr19-40419231-40428443	Chr19:40419231-40428443	ZNF780A
Ccer2|Chr7:28732675-28733174	Chr19:38949768-38950143	Chr19-38948037-38951037	Chr19:38948037-38951037	CCER2
Nfkbib|Chr7:29039509-29040008	Chr19:38544280-38544873	Chr19-38543068-38545512	Chr19:38543068-38545512	NFKBIB
Ppp1r14a|Chr7:29039509-29040008	Chr19:38544280-38544873	Chr19-38543068-38545512	Chr19:38543068-38545512	PPP1R14A
Scn1b|Chr7:31139693-31140192	Chr19:35012587-35013432	Chr19-35011062-35016209	Chr19:35011062-35016209	SCN1B
Gramd1a|Chr7:31208067-31208566	Chr19:34772831-34773320	Chr19-34772226-34774137	Chr19:34772226-34774137	GRAMD1A
Usf2|Chr7:31208067-31208566	Chr19:34772831-34773320	Chr19-34772226-34774137	Chr19:34772226-34774137	USF2
Cebpg|Chr7:34605974-34606473	Chr19:33868735-33869238	Chr19-33867636-33869488	Chr19:33867636-33869488	CEBPG
Pepd|Chr7:34671861-34672360	Chr19:33778153-33778518	Chr19-33777274-33779270	Chr19:33777274-33779270	PEPD
Cebpg|Chr7:34939104-34939603	Chr19:33496692-33497160	Chr19-33496244-33497391	Chr19:33496244-33497391	CEBPG
Cep89|Chr7:35025879-35026378	Chr19:33406825-33407282	Chr19-33401950-33409403	Chr19:33401950-33409403	CEP89
Cep89|Chr7:35171752-35172251	Chr19:33241655-33242244	Chr19-33240416-33242382	Chr19:33240416-33242382	CEP89
Myadm|Chr7:3674808-3675307	Chr19:54168404-54169401	Chr19-54167795-54169684	Chr19:54167795-54169684	MYADM
Prpf31|Chr7:3674808-3675307	Chr19:54168404-54169401	Chr19-54167795-54169684	Chr19:54167795-54169684	PRPF31
Ruvbl2|Chr7:45339409-45339908	Chr19:49150403-49150884	Chr19-49145120-49153550	Chr19:49145120-49153550	RUVBL2
Igf1r|Chr7:67714125-67714624	Chr15:99148947-99149548	Chr15-99147963-99150431	Chr15:99147963-99150431	IGF1R
Mrps11|Chr7:78766002-78766501	Chr15:88449818-88450367	Chr15-88449983-88450647	Chr15:88449983-88450647	MRPS11
Mrps11|Chr7:78791400-78791899	Chr15:88476426-88477014	Chr15-88475732-88477672	Chr15:88475732-88477672	MRPS11
Det1|Chr7:78890553-78891052	Chr15:88614065-88615276	Chr15-88614473-88614928	Chr15:88614473-88614928	DET1
Fah|Chr7:84372292-84372791	Chr15:80440950-80441455	Chr15-80440363-80441307	Chr15:80440363-80441307	FAH
Alg8|Chr7:97297421-97297920	Chr11:78228325-78228884	Chr11-78227932-78232082	Chr11:78227932-78232082	ALG8
Kctd21|Chr7:97446457-97446956	Chr11:78030548-78031054	Chr11-78027925-78036395	Chr11:78027925-78036395	KCTD21
Terb1|Chr8:104146224-104146723	Chr16:66406302-66406887	Chr16-66406060-66409146	Chr16:66406060-66409146	TERB1
4931428F04Rik|Chr8:105120850-105121349	Chr16:66977503-66978012	Chr16-66976642-66980505	Chr16:66976642-66980505	KIAA0895L
Zfp90|Chr8:106717949-106718448	Chr16:68902309-68902812	Chr16-68900939-68902962	Chr16:68900939-68902962	ZFP90
Nudt7|Chr8:113984754-113985253	Chr16:77584133-77584588	Chr16-77584014-77584847	Chr16:77584014-77584847	NUDT7
Zdhhc7|Chr8:120382479-120382978	Chr16:85395517-85396064	Chr16-85393275-85397772	Chr16:85393275-85397772	ZDHHC7
Irf2bp2|Chr8:126867578-126868077	Chr1:235011704-235012220	Chr1-235011267-235014080	Chr1:235011267-235014080	IRF2BP2
Adam32|Chr8:25200800-25201299	Chr8:38787565-38788089	Chr8-38784414-38794236	Chr8:38784414-38794236	ADAM32
Adam32|Chr8:25274939-25275438	Chr8:38714472-38714798	Chr8-38712398-38714961	Chr8:38712398-38714961	ADAM32
Snx25|Chr8:45816925-45817424	Chr4:185597450-185598057	Chr4-185596633-185598432	Chr4:185596633-185598432	SNX25
Yjefn3|Chr8:69920180-69920679	Chr19:19489175-19489745	Chr19-19485043-19495029	Chr19:19485043-19495029	YJEFN3
Armc6|Chr8:70089002-70089501	Chr19:19256813-19257401	Chr19-19256296-19257054	Chr19:19256296-19257054	ARMC6
Yjefn3|Chr8:70118635-70119134	Chr19:19214041-19214586	Chr19-19211644-19215347	Chr19:19211644-19215347	YJEFN3
Crtc1|Chr8:70166671-70167170	Chr19:19145914-19146581	Chr19-19145234-19146775	Chr19:19145234-19146775	CRTC1
Nr3c2|Chr8:77256483-77256982	Chr4:148064897-148065413	Chr4-148064235-148065456	Chr4:148064235-148065456	NR3C2
Cyld|Chr8:88793517-88794016	Chr16:50862872-50863391	Chr16-50856676-50865799	Chr16:50856676-50865799	CYLD
Adgrg1|Chr8:94950025-94950524	Chr16:57591322-57591867	Chr16-57590784-57593299	Chr16:57590784-57593299	ADGRG1
Gpr62|Chr9:106418194-106418693	Chr3:52005439-52005993	Chr3-52000933-52008600	Chr3:52000933-52008600	GPR62
Gnai2|Chr9:107254820-107255319	Chr3:50648904-50649404	Chr3-50646766-50653183	Chr3:50646766-50653183	GNAI2
Rassf1|Chr9:107357559-107358058	Chr3:50550092-50550650	Chr3-50549531-50550790	Chr3:50549531-50550790	RASSF1
Cyb561d2|Chr9:107463429-107463928	Chr3:50436135-50436572	Chr3-50435691-50437011	Chr3:50435691-50437011	CYB561D2
Cyb561d2|Chr9:107709064-107709563	Chr3:50155428-50155963	Chr3-50154204-50157469	Chr3:50154204-50157469	CYB561D2
Nprl2|Chr9:107738696-107739195	Chr3:50120526-50121166	Chr3-50117883-50126894	Chr3:50117883-50126894	NPRL2
Tusc2|Chr9:107738696-107739195	Chr3:50120526-50121166	Chr3-50117883-50126894	Chr3:50117883-50126894	TUSC2
Cyb561d2|Chr9:107904625-107905124	Chr3:49906215-49906752	Chr3-49905886-49906862	Chr3:49905886-49906862	CYB561D2
Ubp1|Chr9:113812312-113812811	Chr3:33645234-33645740	Chr3-33644090-33647957	Chr3:33644090-33647957	UBP1
Zfp651|Chr9:121947714-121948213	Chr3:42961494-42961885	Chr3-42961537-42962119	Chr3:42961537-42962119	ZBTB47
Ankrd49|Chr9:14613981-14614480	Chr11:94768807-94769504	Chr11-94766827-94770330	Chr11:94766827-94770330	ANKRD49
Tyk2|Chr9:21030643-21031142	Chr19:10288606-10289088	Chr19-10288939-10293210	Chr19:10288939-10293210	TYK2
Tmed1|Chr9:21196478-21196977	Chr19:10452633-10453144	Chr19-10452551-10454945	Chr19:10452551-10454945	TMED1
Thyn1|Chr9:27176089-27176588	Chr11:134050182-134050978	Chr11-134049397-134051963	Chr11:134049397-134051963	THYN1
Usp2|Chr9:43698287-43698786	Chr11:119774141-119774690	Chr11-119771818-119774746	Chr11:119771818-119774746	USP2
Bcl9l|Chr9:44096496-44096995	Chr11:119352867-119353441	Chr11-119349732-119358735	Chr11:119349732-119358735	BCL9L
Dscaml1|Chr9:45388527-45389026	Chr11:117843851-117844198	Chr11-117843501-117844762	Chr11:117843501-117844762	DSCAML1
Hykk|Chr9:54676444-54676943	Chr15:78241004-78241784	Chr15-78239817-78246834	Chr15:78239817-78246834	HYKK
Scamp5|Chr9:57468833-57469332	Chr15:74994289-74994843	Chr15-74991769-74997634	Chr15:74991769-74997634	SCAMP5
Arid3b|Chr9:57659686-57660185	Chr15:74768945-74769325	Chr15-74767914-74775943	Chr15:74767914-74775943	ARID3B
Sema7a|Chr9:57659686-57660185	Chr15:74768945-74769325	Chr15-74767914-74775943	Chr15:74767914-74775943	SEMA7A
Ulk3|Chr9:57696194-57696693	Chr15:74726446-74726947	Chr15-74723661-74726922	Chr15:74723661-74726922	ULK3
Rec114|Chr9:58330208-58330707	Chr15:73908286-73908816	Chr15-73908037-73908875	Chr15:73908037-73908875	REC114
Tipin|Chr9:63918793-63919292	Chr15:66850366-66850890	Chr15-66849839-66851966	Chr15:66849839-66851966	TIPIN
Mtfmt|Chr9:65523867-65524366	Chr15:64905532-64905839	Chr15-64904465-64906554	Chr15:64904465-64906554	MTFMT
Ick|Chr9:78107658-78108157	Chr6:53066167-53066679	Chr6-53063814-53067829	Chr6:53063814-53067829	ICK
Copb2|Chr9:98409058-98409557	Chr3:139562025-139562594	Chr3-139559359-139562922	Chr3:139559359-139562922	COPB2
Iqsec2|ChrX:152147363-152147862	ChrX:53317433-53317951	ChrX-53317057-53322200	ChrX:53317057-53322200	IQSEC2
Eif1ax|ChrX:159829116-159829615	ChrX:19682961-19683473	ChrX-19682620-19684292	ChrX:19682620-19684292	EIF1AX
Syap1|ChrX:162902046-162902545	ChrX:16711629-16712190	ChrX-16710787-16713499	ChrX:16710787-16713499	SYAP1
Rab9|ChrX:166660744-166661243	ChrX:13488158-13488986	ChrX-13487503-13488798	ChrX:13487503-13488798	RAB9A
Arhgap6|ChrX:169036386-169036885	ChrX:11427532-11428079	ChrX-11426794-11428533	ChrX:11426794-11428533	ARHGAP6
Elk1|ChrX:20828842-20829341	ChrX:47540999-47541526	ChrX-47540150-47542110	ChrX:47540150-47542110	ELK1
Ube2a|ChrX:36863976-36864475	ChrX:119565193-119565521	ChrX-119564692-119566032	ChrX:119564692-119566032	UBE2A
Plxnb3|ChrX:73384330-73384829	ChrX:153381760-153382275	ChrX-153380717-153382688	ChrX:153380717-153382688	PLXNB3
Flna|ChrX:73948557-73949056	ChrX:153953221-153953761	ChrX-153951678-153957272	ChrX:153951678-153957272	FLNA
Emd|ChrX:74115515-74116014	ChrX:154136635-154137040	ChrX-154136494-154137425	ChrX:154136494-154137425	EMD
Eda|ChrX:99657930-99658429	ChrX:69387416-69387924	ChrX-69387490-69388911	ChrX:69387490-69388911	EDA
Dnajc14|Chr10:128895379-128895878	Chr12:55738761-55739270	Chr12-55735554-55739778	Chr12:55735554-55739778	DNAJC14
Ccdc138|Chr10:58627603-58628102	Chr2:108928420-108928805	Chr2-108927992-108929215	Chr2:108927992-108929215	CCDC138
Tubg2|Chr11:100893331-100893830	Chr17:42322555-42323205	Chr17-42321720-42325480	Chr17:42321720-42325480	TUBG2
Fam171a2|Chr11:102102424-102102923	Chr17:43943802-43944436	Chr17-43943567-43944771	Chr17:43943567-43944771	FAM171A2
Ccdc43|Chr11:102992838-102993337	Chr17:45022007-45022438	Chr17-45017860-45025025	Chr17:45017860-45025025	CCDC43
Ccdc43|Chr11:103006832-103007331	Chr17:45042702-45043385	Chr17-45040295-45044691	Chr17:45040295-45044691	CCDC43
Hexim2|Chr11:103006832-103007331	Chr17:45042702-45043385	Chr17-45040295-45044691	Chr17:45040295-45044691	HEXIM2
Pitpnc1|Chr11:107341239-107341738	Chr17:67528969-67529435	Chr17-67527477-67533378	Chr17:67527477-67533378	PITPNC1
Zpbp|Chr11:11115796-11116295	Chr7:49775318-49775820	Chr7-49772503-49777447	Chr7:49772503-49777447	ZPBP
Slc39a11|Chr11:113651761-113652260	Chr17:73196418-73196935	Chr17-73188849-73197799	Chr17:73188849-73197799	SLC39A11
Fam104a|Chr11:114068315-114068814	Chr17:73646564-73647083	Chr17-73642066-73648471	Chr17:73642066-73648471	FAM104A
Eif4a3|Chr11:119206489-119206988	Chr17:80008226-80008854	Chr17-80005243-80010743	Chr17:80005243-80010743	EIF4A3
Bod1|Chr11:31827917-31828416	Chr5:173825998-173826559	Chr5-173823686-173826520	Chr5:173823686-173826520	BOD1
Tmcc2|Chr1:132660127-132660626	Chr1:204923362-204923906	Chr1-204920482-204926092	Chr1:204920482-204926092	TMCC2
Slc36a1|Chr11:55039560-55040059	Chr5:151164656-151165182	Chr5-151164571-151165250	Chr5:151164571-151165250	SLC36A1
Drc3|Chr11:60094122-60094621	Chr17:17668908-17669967	Chr17-17668333-17670001	Chr17:17668333-17670001	DRC3
Ramp3|Chr11:6406260-6406759	Chr7:44768959-44769502	Chr7-44763683-44772364	Chr7:44763683-44772364	RAMP3
Shisa6|Chr11:67010355-67010854	Chr17:10743857-10744811	Chr17-10743343-10744100	Chr17:10743343-10744100	SHISA6
Pbx1|Chr1:168676336-168676835	Chr1:164321090-164321652	Chr1-164320761-164321808	Chr1:164320761-164321808	PBX1
Kdm6b|Chr11:69802708-69803207	Chr17:7437971-7438500	Chr17-7433861-7442071	Chr17:7433861-7442071	KDM6B
Pafah1b1|Chr11:74408862-74409361	Chr17:3004129-3004626	Chr17-3001567-3006275	Chr17:3001567-3006275	PAFAH1B1
Sarm1|Chr11:78347306-78347805	Chr17:28548092-28548616	Chr17-28546925-28550090	Chr17:28546925-28550090	SARM1
Rhbdl3|Chr11:80336226-80336725	Chr17:32303703-32304211	Chr17-32303007-32304427	Chr17:32303007-32304427	RHBDL3
Mllt6|Chr11:97669702-97670201	Chr17:38712138-38712639	Chr17-38712104-38713751	Chr17:38712104-38713751	MLLT6
Klc1|Chr12:111514185-111514684	Chr14:103311976-103312278	Chr14-103308961-103317593	Chr14:103308961-103317593	KLC1
Rapgef5|Chr12:117403430-117403929	Chr7:22488847-22489274	Chr7-22485995-22489838	Chr7:22485995-22489838	RAPGEF5
Itgb1bp1|Chr12:21119516-21120015	Chr2:9217105-9217618	Chr2-9217137-9217591	Chr2:9217137-9217591	ITGB1BP1
Tmem63c|Chr12:86790077-86790576	Chr14:76904145-76904693	Chr14-76903919-76905589	Chr14:76903919-76905589	TMEM63C
Gtf2a1|Chr12:91314107-91314606	Chr14:80850048-80850578	Chr14-80850014-80850635	Chr14:80850014-80850635	GTF2A1
Carmil1|Chr13:24638416-24638915	Chr6:24910842-24911384	Chr6-24907860-24911743	Chr6:24907860-24911743	CARMIL1
BC005537|Chr13:24687258-24687757	Chr6:24855630-24856436	Chr6-24855607-24856440	Chr6:24855607-24856440	C6orf62
Prim2|Chr1:34006196-34006695	Chr6:56851075-56851598	Chr6-56848186-56853643	Chr6:56848186-56853643	PRIM2
Tpmt|Chr13:46884844-46885343	Chr6:17931815-17932311	Chr6-17927006-17934039	Chr6:17927006-17934039	TPMT
2210016F16Rik|Chr13:58637262-58637761	Chr9:84397159-84397526	Chr9-84396879-84398036	Chr9:84396879-84398036	C9orf64
Zbed3|Chr13:95221889-95222388	Chr5:77211379-77211851	Chr5-77208441-77212188	Chr5:77208441-77212188	ZBED3
Map1b|Chr13:99837705-99838204	Chr5:71782885-71783403	Chr5-71782318-71784259	Chr5:71782318-71784259	MAP1B
Psme2|Chr14:55743653-55744152	Chr14:24296733-24297291	Chr14-24296161-24300897	Chr14:24296161-24300897	PSME2
Zfp395|Chr14:65117990-65118489	Chr8:28677389-28677906	Chr8-28676186-28679405	Chr8:28676186-28679405	ZNF395
Zfp395|Chr14:65381486-65381985	Chr8:28363555-28363917	Chr8-28362993-28366293	Chr8:28362993-28366293	ZNF395
Fbxo16|Chr14:65389637-65390136	Chr8:28354706-28356092	Chr8-28355578-28357269	Chr8:28355578-28357269	FBXO16
Bnip3l|Chr14:66636074-66636573	Chr8:26865985-26866456	Chr8-26863627-26867665	Chr8:26863627-26867665	BNIP3L
Bin3|Chr14:69823183-69823682	Chr8:22981533-22981992	Chr8-22981064-22983430	Chr8:22981064-22983430	BIN3
Pde1b|Chr15:103420739-103421238	Chr12:54462926-54463219	Chr12-54462444-54465547	Chr12:54462444-54465547	PDE1B
Pgap1|Chr1:54734771-54735270	Chr2:197088484-197088985	Chr2-197085380-197093007	Chr2:197085380-197093007	PGAP1
Spats2l|Chr1:57428892-57429391	Chr2:199980004-199980535	Chr2-199979403-199980680	Chr2:199979403-199980680	SPATS2L
Eif3l|Chr15:79270234-79270733	Chr22:38096657-38097311	Chr22-38097164-38098541	Chr22:38097164-38098541	EIF3L
Tob2|Chr15:81718286-81718785	Chr22:41264339-41264706	Chr22-41260298-41268337	Chr22:41260298-41268337	TOB2
Asb8|Chr15:97809932-97810431	Chr12:47797392-47797827	Chr12-47796844-47804644	Chr12:47796844-47804644	ASB8
Tuba1b|Chr15:98804005-98804504	Chr12:48995372-48995836	Chr12-48994654-49000555	Chr12:48994654-49000555	TUBA1B
Hacd2|Chr16:35270298-35270797	Chr3:123328842-123329311	Chr3-123327786-123331129	Chr3:123327786-123331129	HACD2
Crebbp|Chr16:4586432-4586931	Chr16:4307410-4307868	Chr16-4305642-4310554	Chr16:4305642-4310554	CREBBP
Trmt10c|Chr16:55863328-55863827	Chr3:101803147-101803751	Chr3-101802748-101804034	Chr3:101802748-101804034	TRMT10C
Zfp213|Chr17:23748817-23749316	Chr16:2956117-2956633	Chr16-2956119-2956760	Chr16:2956119-2956760	ZNF213
Igfbp5|Chr1:72865740-72866239	Chr2:216681050-216683574	Chr2-216681267-216684408	Chr2:216681267-216684408	IGFBP5
Wdr4|Chr17:31309329-31309828	Chr21:42527732-42528191	Chr21-42522583-42528798	Chr21:42522583-42528798	WDR4
Pkdcc|Chr17:83129084-83129583	Chr2:41954108-41954606	Chr2-41953183-41956083	Chr2:41953183-41956083	PKDCC
Pde10a|Chr17:8801484-8801983	Chr6:165662091-165662559	Chr6-165659668-165664889	Chr6:165659668-165664889	PDE10A
Pkd2l2|Chr18:34663018-34663517	Chr5:138222814-138223163	Chr5-138222683-138223240	Chr5:138222683-138223240	PKD2L2
Hars2|Chr18:37218073-37218572	Chr5:141041023-141041492	Chr5-141039587-141041956	Chr5:141039587-141041956	HARS2
Phax|Chr18:56811687-56812186	Chr5:126917860-126918343	Chr5-126917916-126918430	Chr5:126917916-126918430	PHAX
Htr2b|Chr1:85909071-85909570	Chr2:230879638-230880276	Chr2-230878821-230879707	Chr2:230878821-230879707	HTR2B
Seh1l|Chr18:68052212-68052711	Chr18:13374729-13375242	Chr18-13374091-13383900	Chr18:13374091-13383900	SEH1L
Seh1l|Chr18:68058839-68059338	Chr18:13381772-13382269	Chr18-13374091-13383900	Chr18:13374091-13383900	SEH1L
Timm21|Chr18:85259027-85259526	Chr18:73859940-73860334	Chr18-73859989-73860361	Chr18:73859989-73860361	TIMM21
Tmem138|Chr19:10502547-10503046	Chr11:61446023-61446635	Chr11-61444164-61449053	Chr11:61444164-61449053	TMEM138
Scly|Chr1:91098865-91099364	Chr2:237744915-237745437	Chr2-237744600-237745639	Chr2:237744600-237745639	SCLY
Golga7b|Chr19:42672993-42673492	Chr10:98326466-98326977	Chr10-98326421-98327650	Chr10:98326421-98327650	GOLGA7B
Banf1|Chr19:5151201-5151700	Chr11:66222673-66223598	Chr11-66221890-66223774	Chr11:66221890-66223774	BANF1
Tmem179b|Chr19:9110157-9110656	Chr11:62394749-62395381	Chr11-62394420-62396471	Chr11:62394420-62396471	TMEM179B
Uqcc3|Chr19:9110157-9110656	Chr11:62394749-62395381	Chr11-62394420-62396471	Chr11:62394420-62396471	UQCC3
Commd9|Chr2:101762312-101762811	Chr11:36411937-36412489	Chr11-36410117-36413398	Chr11:36410117-36413398	COMMD9
Zfyve19|Chr2:119250736-119251235	Chr15:40859048-40859331	Chr15-40858926-40859715	Chr15:40858926-40859715	ZFYVE19
Snap23|Chr2:120731311-120731810	Chr15:42736910-42737347	Chr15-42735025-42738702	Chr15:42735025-42738702	SNAP23
Slc30a4|Chr2:122375417-122375916	Chr15:45198540-45199068	Chr15-45197140-45203887	Chr15:45197140-45203887	SLC30A4
Ptpra|Chr2:130291386-130291885	Chr20:2687860-2688369	Chr20-2687579-2688840	Chr20:2687579-2688840	PTPRA
Cacnb2|Chr2:14603983-14604482	Chr10:18140179-18140768	Chr10-18139972-18142346	Chr10:18139972-18142346	CACNB2
Rbck1|Chr2:151970750-151971249	Chr20:844284-844902	Chr20-843721-847543	Chr20:843721-847543	RBCK1
L3mbtl1|Chr2:163111647-163112146	Chr20:43765840-43766330	Chr20-43765208-43768158	Chr20:43765208-43768158	L3MBTL1
Zfp334|Chr2:165070276-165070775	Chr20:46128462-46128935	Chr20-46128484-46129316	Chr20:46128484-46129316	ZNF334
Elmo2|Chr2:165320516-165321015	Chr20:46399423-46400412	Chr20-46399476-46409474	Chr20:46399476-46409474	ELMO2
Znfx1|Chr2:167112695-167113194	Chr20:49384892-49385213	Chr20-49383408-49386106	Chr20:49383408-49386106	ZNFX1
Dolk|Chr2:30032124-30032623	Chr9:128634277-128634910	Chr9-128634234-128638593	Chr9:128634234-128638593	DOLK
Dnm1|Chr2:32606746-32607245	Chr9:127899340-127899937	Chr9-127895922-127901754	Chr9:127895922-127901754	DNM1
Sh2d3c|Chr2:32896384-32896883	Chr9:127543590-127544053	Chr9-127540358-127547388	Chr9:127540358-127547388	SH2D3C
Fign|Chr2:63963300-63963799	Chr2:163594133-163594631	Chr2-163593744-163595528	Chr2:163593744-163595528	FIGN
Fam102b|Chr3:108961073-108961572	Chr1:108646375-108647335	Chr1-108644915-108647692	Chr1:108644915-108647692	FAM102B
Sass6|Chr3:116327160-116327659	Chr1:100463549-100464209	Chr1-100463462-100464479	Chr1:100463462-100464479	SASS6
Rpf1|Chr3:146620470-146620969	Chr1:84375140-84375648	Chr1-84374949-84375782	Chr1:84374949-84375782	RPF1
Rabggtb|Chr3:153655044-153655543	Chr1:76153983-76154598	Chr1-76153187-76155476	Chr1:76153187-76155476	RABGGTB
Tbl1xr1|Chr3:22190418-22190917	Chr3:177050607-177051232	Chr3-177049759-177053999	Chr3:177049759-177053999	TBL1XR1
Exosc9|Chr3:36688757-36689256	Chr4:121950019-121950634	Chr4-121949887-121952341	Chr4:121949887-121952341	EXOSC9
Adam15|Chr3:89158590-89159089	Chr1:155278696-155279197	Chr1-155276657-155280165	Chr1:155276657-155280165	ADAM15
Kcnn3|Chr3:89354722-89355221	Chr1:155044837-155045361	Chr1-155043257-155045863	Chr1:155043257-155045863	KCNN3
Rnf220|Chr4:117651555-117652054	Chr1:44245045-44245545	Chr1-44244954-44245296	Chr1:44244954-44245296	RNF220
Ppie|Chr4:122898243-122898742	Chr1:40032282-40032602	Chr1-40031900-40033407	Chr1:40031900-40033407	PPIE
Trim62|Chr4:128908464-128908963	Chr1:33147799-33148413	Chr1-33146221-33148399	Chr1:33146221-33148399	TRIM62
Marcksl1|Chr4:129406369-129406868	Chr1:32500742-32501169	Chr1-32499033-32502746	Chr1:32499033-32502746	MARCKSL1
Tmem39b|Chr4:130036016-130036515	Chr1:31715577-31716283	Chr1-31713456-31718307	Chr1:31713456-31718307	TMEM39B
Nudc|Chr4:133196736-133197235	Chr1:27406759-27407260	Chr1-27398560-27408509	Chr1:27398560-27408509	NUDC
Wdtc1|Chr4:133423007-133423506	Chr1:27099011-27099597	Chr1-27099053-27100427	Chr1:27099053-27100427	WDTC1
Plekhg5|Chr4:151666280-151666779	Chr1:7014129-7014666	Chr1-7013654-7014324	Chr1:7013654-7014324	PLEKHG5
Icmt|Chr4:152102989-152103488	Chr1:6475432-6476036	Chr1-6475280-6476206	Chr1:6475280-6476206	ICMT
Icmt|Chr4:152491172-152491671	Chr1:5975393-5975959	Chr1-5972878-5977847	Chr1:5972878-5977847	ICMT
Cntfr|Chr4:41614041-41614540	Chr9:34500515-34501031	Chr9-34500290-34504365	Chr9:34500290-34504365	CNTFR
Galt|Chr4:41653237-41653736	Chr9:34546800-34547397	Chr9-34545667-34551072	Chr9:34545667-34551072	GALT
Dnajb5|Chr4:43208940-43209439	Chr9:35341576-35342072	Chr9-35341625-35342201	Chr9:35341625-35342201	DNAJB5
Zkscan16|Chr4:59002845-59003344	Chr9:111630962-111631524	Chr9-111630317-111632467	Chr9:111630317-111632467	ZNF483
Susd1|Chr4:59388475-59388974	Chr9:112120369-112120884	Chr9-112120553-112120939	Chr9:112120553-112120939	SUSD1
Tpst2|Chr5:112041252-112041751	Chr22:26903348-26903902	Chr22-26902806-26904302	Chr22:26902806-26904302	TPST2
Tesc|Chr5:117841890-117842389	Chr12:117360994-117361654	Chr12-117360590-117361713	Chr12:117360590-117361713	TESC
Tesc|Chr5:118001971-118002470	Chr12:117155333-117155987	Chr12-117155140-117155822	Chr12:117155140-117155822	TESC
Ttyh3|Chr5:140748939-140749438	Chr7:2709428-2709821	Chr7-2705377-2711389	Chr7:2705377-2711389	TTYH3
Hmgb1|Chr5:149373924-149374423	Chr13:30863286-30863774	Chr13-30862486-30863545	Chr13:30862486-30863545	HMGB1
Acox3|Chr5:35746838-35747337	Chr4:8168308-8168854	Chr4-8166941-8168390	Chr4:8166941-8168390	ACOX3
Syn2|Chr6:115538820-115539319	Chr3:12479705-12480288	Chr3-12479454-12480759	Chr3:12479454-12480759	SYN2
Ing4|Chr6:124909886-124910385	Chr12:6773707-6774194	Chr12-6770456-6774279	Chr12:6770456-6774279	ING4
Cracr2a|Chr6:127541857-127542356	Chr12:3777220-3777734	Chr12-3777186-3777598	Chr12:3777186-3777598	CRACR2A
Osbpl3|Chr6:50312565-50313064	Chr7:24820104-24820664	Chr7-24820020-24822001	Chr7:24820020-24822001	OSBPL3
Dysf|Chr6:84095779-84096278	Chr2:71548451-71549039	Chr2-71545386-71551737	Chr2:71545386-71551737	DYSF
Rab43|Chr6:87856977-87857476	Chr3:129195705-129196108	Chr3-129193600-129199345	Chr3:129193600-129199345	RAB43
Iqck|Chr7:118953529-118954028	Chr16:19840640-19841131	Chr16-19832663-19842030	Chr16:19832663-19842030	IQCK
Mapk3|Chr7:126754801-126755300	Chr16:30124368-30124722	Chr16-30120207-30124898	Chr16:30120207-30124898	MAPK3
Adgra1|Chr7:140153341-140153840	Chr10:133423353-133423823	Chr10-133422820-133424033	Chr10:133422820-133424033	ADGRA1
Prkd2|Chr7:16465092-16465591	Chr19:47032090-47032744	Chr19-47032018-47033107	Chr19:47032018-47033107	PRKD2
Zfp574|Chr7:25009939-25010438	Chr19:41998413-41998940	Chr19-41993170-42000418	Chr19:41993170-42000418	ZNF574
Pou2f2|Chr7:25341265-25341764	Chr19:42352500-42352994	Chr19-42351074-42354059	Chr19:42351074-42354059	POU2F2
Samd4b|Chr7:28732675-28733174	Chr19:38949768-38950143	Chr19-38948037-38951037	Chr19:38948037-38951037	SAMD4B
Tfpt|Chr7:3303191-3303690	Chr19:53881877-53882372	Chr19-53881224-53883762	Chr19:53881224-53883762	TFPT
Pop4|Chr7:38167566-38168065	Chr19:29730305-29730846	Chr19-29730205-29731250	Chr19:29730205-29731250	POP4
Nucb1|Chr7:45521622-45522121	Chr19:48881890-48882231	Chr19-48880245-48882479	Chr19:48880245-48882479	NUCB1
Apba2|Chr7:64579812-64580311	Chr15:28955223-28955669	Chr15-28954706-28956451	Chr15:28954706-28956451	APBA2
E2f4|Chr8:105554025-105554524	Chr16:67465677-67466214	Chr16-67463810-67468369	Chr16:67463810-67468369	E2F4
Cmc2|Chr8:117197927-117198426	Chr16:81366391-81366712	Chr16-81366242-81366945	Chr16:81366242-81366945	CMC2
Gan|Chr8:117388406-117388905	Chr16:81625743-81626180	Chr16-81624938-81626947	Chr16:81624938-81626947	GAN
Taf1c|Chr8:119440566-119441065	Chr16:83956560-83957183	Chr16-83950923-83958583	Chr16:83950923-83958583	TAF1C
Taf1c|Chr8:119660990-119661489	Chr16:84284045-84284586	Chr16-84283933-84284538	Chr16:84283933-84284538	TAF1C
Map1lc3b|Chr8:121687827-121688326	Chr16:87541100-87541541	Chr16-87539911-87541924	Chr16:87539911-87541924	MAP1LC3B
Sprtn|Chr8:125066786-125067285	Chr1:231642662-231643102	Chr1-231638714-231645654	Chr1:231638714-231645654	SPRTN
Kbtbd11|Chr8:14683782-14684281	Chr8:1486154-1486746	Chr8-1485574-1489294	Chr8:1485574-1489294	KBTBD11
Mfhas1|Chr8:35707765-35708264	Chr8:8750646-8751131	Chr8-8750462-8751328	Chr8:8750462-8751328	MFHAS1
Myo9b|Chr8:71602718-71603217	Chr19:17539507-17540014	Chr19-17538844-17540583	Chr19:17538844-17540583	MYO9B
Gtpbp3|Chr8:71685480-71685979	Chr19:17831373-17832612	Chr19-17829974-17831726	Chr19:17829974-17831726	GTPBP3
Pkn1|Chr8:83747842-83748341	Chr19:14375641-14376235	Chr19-14374897-14377135	Chr19:14374897-14377135	PKN1
Arl2bp|Chr8:94773503-94774002	Chr16:57373971-57374569	Chr16-57370740-57374719	Chr16:57370740-57374719	ARL2BP
Cep63|Chr9:102528115-102528614	Chr3:134618474-134619065	Chr3-134617880-134619613	Chr3:134617880-134619613	CEP63
Ky|Chr9:102528115-102528614	Chr3:134618474-134619065	Chr3-134617880-134619613	Chr3:134617880-134619613	KY
Gnai2|Chr9:107307786-107308285	Chr3:50601027-50601524	Chr3-50599297-50603931	Chr3:50599297-50603931	GNAI2
Med17|Chr9:15026308-15026807	Chr11:94152160-94152500	Chr11-94150931-94153172	Chr11:94150931-94153172	MED17
Ncapd3|Chr9:26611807-26612306	Chr11:134530708-134531183	Chr11-134530705-134533519	Chr11:134530705-134533519	NCAPD3
Kirrel3|Chr9:34186240-34186739	Chr11:127252268-127252933	Chr11-127251798-127253016	Chr11:127251798-127253016	KIRREL3
Siae|Chr9:37456376-37456875	Chr11:124843056-124843629	Chr11-124843021-124843466	Chr11:124843021-124843466	SIAE
Sidt2|Chr9:45739474-45739973	Chr11:117444603-117445098	Chr11-117442449-117445746	Chr11:117442449-117445746	SIDT2
Fbxo22|Chr9:55392236-55392735	Chr15:76150853-76151379	Chr15-76150170-76151618	Chr15:76150170-76151618	FBXO22
Csk|Chr9:57259645-57260144	Chr15:75204766-75205245	Chr15-75200128-75209087	Chr15:75200128-75209087	CSK
Csk|Chr9:57420521-57421020	Chr15:75043656-75044177	Chr15-75041654-75050451	Chr15:75041654-75050451	CSK
Rora|Chr9:69091941-69092440	Chr15:60781474-60782105	Chr15-60781127-60782292	Chr15:60781127-60782292	RORA
Unc13c|Chr9:73970720-73971219	Chr15:53976773-53977284	Chr15-53976867-53977228	Chr15:53976867-53977228	UNC13C
Slc25a36|Chr9:96758983-96759482	Chr3:141360829-141361338	Chr3-141360444-141361821	Chr3:141360444-141361821	SLC25A36
Zbtb38|Chr9:96758983-96759482	Chr3:141360829-141361338	Chr3-141360444-141361821	Chr3:141360444-141361821	ZBTB38
Prdx4|ChrX:155338233-155338732	ChrX:23667208-23667690	ChrX-23666055-23668713	ChrX:23666055-23668713	PRDX4
Rab33a|ChrX:48285145-48285644	ChrX:129931981-129932482	ChrX-129930671-129937180	ChrX:129930671-129937180	RAB33A
Man1a|Chr10:53863363-53863862	Chr6:119148423-119148919	Chr6-119146851-119149518	Chr6:119146851-119149518	MAN1A1
Mfsd12|Chr10:81267891-81268390	Chr19:3761492-3762030	Chr19-3759365-3764828	Chr19:3759365-3764828	MFSD12
Hap1|Chr11:100332794-100333293	Chr17:41710455-41710870	Chr17-41708567-41712823	Chr17:41708567-41712823	HAP1
Mrps7|Chr11:115473836-115474335	Chr17:75105659-75105994	Chr17-75105401-75107418	Chr17:75105401-75107418	MRPS7
Bod1|Chr11:31759831-31760330	Chr5:173743747-173744242	Chr5-173743220-173746439	Chr5:173743220-173746439	BOD1
Atp2b4|Chr1:133886891-133887390	Chr1:203514042-203514600	Chr1-203511346-203516538	Chr1:203511346-203516538	ATP2B4
Eif5a|Chr11:69552835-69553334	Chr17:7712203-7712709	Chr17-7711991-7712855	Chr17:7711991-7712855	EIF5A
Supt6|Chr11:77850720-77851219	Chr17:29089611-29090124	Chr17-29087711-29097458	Chr17:29087711-29097458	SUPT6H
Evi2a|Chr11:79317582-79318081	Chr17:31067642-31068207	Chr17-31068147-31068831	Chr17:31068147-31068831	EVI2A
Cdk5r1|Chr11:80503972-80504471	Chr17:32519249-32519707	Chr17-32518670-32520972	Chr17:32518670-32520972	CDK5R1
Esrrg|Chr1:187662221-187662720	Chr1:217078008-217078506	Chr1-217075999-217080336	Chr1:217075999-217080336	ESRRG
Iqgap2|Chr13:95891177-95891676	Chr5:76403578-76404137	Chr5-76402276-76404325	Chr5:76402276-76404325	IQGAP2
Tkt|Chr14:30697584-30698083	Chr3:53074919-53075471	Chr3-53072004-53076236	Chr3:53072004-53076236	TKT
Adcy9|Chr16:4267940-4268439	Chr16:3938838-3939266	Chr16-3938453-3939668	Chr16:3938453-3939668	ADCY9
Gap43|Chr16:42717931-42718430	Chr3:115271968-115272412	Chr3-115271918-115272569	Chr3:115271918-115272569	GAP43
Zbtb20|Chr16:42717931-42718430	Chr3:115271968-115272412	Chr3-115271918-115272569	Chr3:115271918-115272569	ZBTB20
Prrt1|Chr17:34671648-34672147	Chr6:32096350-32096849	Chr6-32095542-32097625	Chr6:32095542-32097625	PRRT1
Tmbim1|Chr1:74368131-74368630	Chr2:218367427-218367942	Chr2-218366770-218372841	Chr2:218366770-218372841	TMBIM1
Kcnh8|Chr17:52600940-52601439	Chr3:19146716-19147278	Chr3-19145512-19151021	Chr3:19145512-19151021	KCNH8
Nyap2|Chr1:81317062-81317561	Chr2:225673700-225674247	Chr2-225673692-225674079	Chr2:225673692-225674079	NYAP2
Psat1|Chr19:16063819-16064318	Chr9:78121527-78122423	Chr9-78120809-78122308	Chr9:78120809-78122308	PSAT1
Ptar1|Chr19:23972748-23973247	Chr9:69391971-69392462	Chr9-69391005-69394112	Chr9:69391005-69394112	PTAR1
Gatm|Chr2:122377230-122377729	Chr15:45200272-45200674	Chr15-45197140-45203887	Chr15:45197140-45203887	GATM
Cops2|Chr2:125660005-125660504	Chr15:48861983-48862376	Chr15-48861458-48863016	Chr15:48861458-48863016	COPS2
Lamp5|Chr2:136058003-136058502	Chr20:9514512-9515059	Chr20-9514018-9516951	Chr20:9514018-9516951	LAMP5
Dbndd2|Chr2:164407626-164408125	Chr20:45311427-45311979	Chr20-45311438-45312406	Chr20:45311438-45312406	DBNDD2
Mvb12b|Chr2:33801653-33802152	Chr9:126422736-126423260	Chr9-126418813-126426615	Chr9:126418813-126426615	MVB12B
Syt13|Chr2:93287322-93287821	Chr11:44793580-44794129	Chr11-44793682-44794083	Chr11:44793682-44794083	SYT13
Slc16a1|Chr3:104441680-104442179	Chr1:113140731-113141385	Chr1-113140109-113141731	Chr1:113140109-113141731	SLC16A1
Kcnd3|Chr3:105538674-105539173	Chr1:111904565-111905073	Chr1-111904002-111905691	Chr1:111904002-111905691	KCND3
Rbm15|Chr3:107559080-107559579	Chr1:110106116-110106736	Chr1-110105681-110106884	Chr1:110105681-110106884	RBM15
Ntng1|Chr3:110141560-110142059	Chr1:107142049-107142544	Chr1-107138944-107142874	Chr1:107138944-107142874	NTNG1
Papss1|Chr3:131320138-131320637	Chr4:107913179-107913707	Chr4-107913215-107913950	Chr4:107913215-107913950	PAPSS1
Unc5c|Chr3:141819287-141819786	Chr4:95181311-95181812	Chr4-95180115-95189627	Chr4:95180115-95189627	UNC5C
Prdx1|Chr4:116626562-116627061	Chr1:45584487-45584980	Chr1-45580558-45586836	Chr1:45580558-45586836	PRDX1
Sh3bgrl3|Chr4:134035974-134036473	Chr1:26391355-26391875	Chr1-26390718-26392193	Chr1:26390718-26392193	SH3BGRL3
Adamtsl1|Chr4:85309260-85309759	Chr9:17695065-17695588	Chr9-17695386-17696083	Chr9:17695386-17696083	ADAMTSL1
Denr|Chr5:123670874-123671373	Chr12:122399628-122400202	Chr12-122399202-122400853	Chr12:122399202-122400853	DENR
Eif2b1|Chr5:124452868-124453367	Chr12:123397411-123398576	Chr12-123394485-123400316	Chr12:123394485-123400316	EIF2B1
Atg9b|Chr5:24387157-24387656	Chr7:151018080-151018592	Chr7-151015979-151020866	Chr7:151015979-151020866	ATG9B
Lap3|Chr5:45278556-45279055	Chr4:17324331-17324723	Chr4-17323270-17324834	Chr4:17323270-17324834	LAP3
Kit|Chr5:75591470-75591969	Chr4:54675794-54676147	Chr4-54675576-54676495	Chr4:54675576-54676495	KIT
Sec13|Chr6:113761641-113762140	Chr3:10344087-10344606	Chr3-10343990-10345101	Chr3:10343990-10345101	SEC13
Cacna1c|Chr6:118977630-118978129	Chr12:2213337-2213875	Chr12-2213103-2214078	Chr12:2213103-2214078	CACNA1C
Kcna1|Chr6:126585786-126586285	Chr12:4978805-4979250	Chr12-4978711-4979364	Chr12:4978711-4979364	KCNA1
Foxp2|Chr6:14899782-14900281	Chr7:114084699-114085189	Chr7-114081645-114088479	Chr7:114081645-114088479	FOXP2
Ptn|Chr6:36903246-36903745	Chr7:137453278-137453804	Chr7-137451037-137455258	Chr7:137451037-137455258	PTN
Hipk2|Chr6:38695276-38695775	Chr7:139569877-139570437	Chr7-139565841-139572269	Chr7:139565841-139572269	HIPK2
Aup1|Chr6:83179295-83179794	Chr2:74380116-74380663	Chr2-74377682-74382284	Chr2:74377682-74382284	AUP1
Nxph1|Chr6:9076437-9076936	Chr7:8561283-8561825	Chr7-8561154-8561706	Chr7:8561154-8561706	NXPH1
Mob2|Chr7:142037695-142038194	Chr11:1515381-1515837	Chr11-1513667-1517901	Chr11:1513667-1517901	MOB2
Rps19|Chr7:25007576-25008075	Chr19:41995927-41996359	Chr19-41993170-42000418	Chr19:41993170-42000418	RPS19
Ppp1r14a|Chr7:29452988-29453487	Chr19:38003650-38004101	Chr19-38002468-38007623	Chr19:38002468-38007623	PPP1R14A
Tshz3|Chr7:36707856-36708355	Chr19:31339331-31339793	Chr19-31339404-31339693	Chr19:31339404-31339693	TSHZ3
Cpt1c|Chr7:45198367-45198866	Chr19:49391886-49392365	Chr19-49391799-49392351	Chr19:49391799-49392351	CPT1C
Galnt2|Chr8:124403891-124404390	Chr1:230383648-230384046	Chr1-230380446-230383968	Chr1:230380446-230383968	GALNT2
Atp13a1|Chr8:70118635-70119134	Chr19:19214041-19214586	Chr19-19211644-19215347	Chr19:19211644-19215347	ATP13A1
Lsm4|Chr8:70585191-70585690	Chr19:18450833-18451595	Chr19-18448617-18455554	Chr19:18448617-18455554	LSM4
Tmem59l|Chr8:70684249-70684748	Chr19:18294501-18295042	Chr19-18286122-18295999	Chr19:18286122-18295999	TMEM59L
Scn3b|Chr9:40455162-40455661	Chr11:123430801-123431287	Chr11-123429365-123432135	Chr11:123429365-123432135	SCN3B
Ubash3b|Chr9:41156605-41157104	Chr11:122656523-122657003	Chr11-122654944-122657329	Chr11:122654944-122657329	UBASH3B
Dscaml1|Chr9:45739474-45739973	Chr11:117444603-117445098	Chr11-117442449-117445746	Chr11:117442449-117445746	DSCAML1
Pdzd4|ChrX:73384330-73384829	ChrX:153381760-153382275	ChrX-153380717-153382688	ChrX:153380717-153382688	PDZD4
Map3k5|Chr10:20125153-20125652	Chr6:136582987-136583534	Chr6-136582067-136583356	Chr6:136582067-136583356	MAP3K5
P3h4|Chr11:100312322-100312821	Chr17:41683545-41684095	Chr17-41682087-41685219	Chr17:41682087-41685219	P3H4
Hexim2|Chr11:103080561-103081060	Chr17:45121268-45121820	Chr17-45120424-45122385	Chr17:45120424-45122385	HEXIM2
Limd2|Chr11:106418500-106418999	Chr17:64063608-64064160	Chr17-64063767-64064480	Chr17:64063767-64064480	LIMD2
Cacng5|Chr11:107812920-107813419	Chr17:66944420-66944920	Chr17-66944212-66945902	Chr17:66944212-66945902	CACNG5
Abca6|Chr11:110268391-110268890	Chr17:69235288-69235776	Chr17-69233924-69237298	Chr17:69233924-69237298	ABCA6
D11Wsu47e|Chr11:113865525-113866024	Chr17:73429256-73429790	Chr17-73429288-73430636	Chr17:73429288-73430636	C17orf80
Nat9|Chr11:114912728-114913227	Chr17:74493463-74494120	Chr17-74493071-74493959	Chr17:74493071-74493959	NAT9
Rtn4|Chr11:29694001-29694500	Chr2:55048884-55049391	Chr2-55043581-55052705	Chr2:55043581-55052705	RTN4
Ccdc117|Chr11:5114824-5115323	Chr22:29245474-29245960	Chr22-29244890-29246440	Chr22:29244890-29246440	CCDC117
Rad50|Chr11:54122802-54123301	Chr5:132205278-132205691	Chr5-132205647-132205897	Chr5:132205647-132205897	RAD50
Uck2|Chr1:167660824-167661323	Chr1:165376159-165376621	Chr1-165375404-165377268	Chr1:165375404-165377268	UCK2
Nrcam|Chr12:44438765-44439264	Chr7:108328313-108328809	Chr7-108328394-108328795	Chr7:108328394-108328795	NRCAM
Map3k9|Chr12:81788557-81789056	Chr14:70817592-70818067	Chr14-70817191-70818294	Chr14:70817191-70818294	MAP3K9
Tubb2a|Chr13:34095983-34096482	Chr6:3194578-3195014	Chr6-3192399-3197145	Chr6:3192399-3197145	TUBB2A
Ddx41|Chr13:55405314-55405813	Chr5:177390391-177390868	Chr5-177389284-177391587	Chr5:177389284-177391587	DDX41
Phyhip|Chr14:70780717-70781216	Chr8:21905868-21906225	Chr8-21905016-21906575	Chr8:21905016-21906575	PHYHIP
Slc25a30|Chr14:76033064-76033563	Chr13:45102428-45102904	Chr13-45100375-45104255	Chr13:45100375-45104255	SLC25A30
Prr13|Chr15:102224392-102224891	Chr12:53197583-53198070	Chr12-53196175-53199088	Chr12:53196175-53199088	PRR13
Pbx2|Chr17:34813674-34814173	Chr6:31996488-31997021	Chr6-31996569-31996711	Chr6:31996569-31996711	PBX2
Hsp90ab1|Chr17:46030348-46030847	Chr6:43771747-43772230	Chr6-43768343-43776684	Chr6:43768343-43776684	HSP90AB1
Vegfa|Chr17:46030348-46030847	Chr6:43771747-43772230	Chr6-43768343-43776684	Chr6:43768343-43776684	VEGFA
Ttc7|Chr17:86937442-86937941	Chr2:46499766-46500283	Chr2-46496231-46501374	Chr2:46496231-46501374	TTC7A
Vps37c|Chr19:10831364-10831863	Chr11:60970323-60970803	Chr11-60970242-60971575	Chr11:60970242-60971575	VPS37C
Dtx4|Chr19:12466094-12466593	Chr11:59207919-59208404	Chr11-59205035-59213634	Chr11:59205035-59213634	DTX4
Fxn|Chr19:24300830-24301329	Chr9:68999785-69000070	Chr9-68995740-69000226	Chr9:68995740-69000226	FXN
As3mt|Chr19:46670601-46671100	Chr10:102834848-102835400	Chr10-102834696-102835707	Chr10:102834696-102835707	AS3MT
Taf5|Chr19:47228506-47229005	Chr10:103554823-103555323	Chr10-103553494-103557132	Chr10:103553494-103557132	TAF5
Smndc1|Chr19:52992957-52993456	Chr10:109866406-109866779	Chr10-109866232-109867226	Chr10:109866232-109867226	SMNDC1
Lin7c|Chr2:109693260-109693759	Chr11:27700305-27700832	Chr11-27698701-27701913	Chr11:27698701-27701913	LIN7C
Fam98b|Chr2:117231203-117231702	Chr15:38414454-38414811	Chr15-38414259-38414829	Chr15:38414259-38414829	FAM98B
Pak6|Chr2:118714198-118714697	Chr15:40293942-40294339	Chr15-40293283-40294511	Chr15:40293283-40294511	PAK6
Actr5|Chr2:158863756-158864255	Chr20:39047978-39048461	Chr20-39047586-39051010	Chr20:39047586-39051010	ACTR5
Thnsl1|Chr2:21261551-21262050	Chr10:25080825-25081380	Chr10-25079998-25085762	Chr10:25079998-25085762	THNSL1
Ovgp1|Chr3:105521067-105521566	Chr1:111920289-111920800	Chr1-111919548-111922387	Chr1:111919548-111922387	OVGP1
Rwdd3|Chr3:121263182-121263681	Chr1:95116728-95117110	Chr1-95115596-95122158	Chr1:95115596-95122158	RWDD3
Clk2|Chr3:89340438-89340937	Chr1:155061414-155061937	Chr1-155059941-155064767	Chr1:155059941-155064767	CLK2
Pmvk|Chr3:89340438-89340937	Chr1:155061414-155061937	Chr1-155059941-155064767	Chr1:155059941-155064767	PMVK
Hax1|Chr3:89646927-89647426	Chr1:154730812-154731350	Chr1-154730194-154732741	Chr1:154730194-154732741	HAX1
Kcnn3|Chr3:89660221-89660720	Chr1:154715845-154716351	Chr1-154715877-154717239	Chr1:154715877-154717239	KCNN3
Hectd3|Chr4:116788887-116789386	Chr1:45359084-45360312	Chr1-45358873-45363026	Chr1:45358873-45363026	HECTD3
Megf6|Chr4:154471593-154472092	Chr1:3249712-3250290	Chr1-3248951-3249982	Chr1:3248951-3249982	MEGF6
Lyrm2|Chr4:32569906-32570405	Chr6:89942591-89943239	Chr6-89939607-89944204	Chr6:89939607-89944204	LYRM2
Susd1|Chr4:59569512-59570011	Chr9:112361496-112362021	Chr9-112361471-112362136	Chr9:112361471-112362136	SUSD1
Rgs3|Chr4:62582708-62583207	Chr9:113462883-113463406	Chr9-113463202-113464244	Chr9:113463202-113464244	RGS3
Mn1|Chr5:111408500-111408999	Chr22:27810645-27811147	Chr22-27810374-27811554	Chr22:27810374-27811554	MN1
Acad10|Chr5:121477595-121478094	Chr12:111945196-111945624	Chr12-111945044-111945653	Chr12:111945044-111945653	ACAD10
Rnf34|Chr5:123049166-123049665	Chr12:121672389-121672764	Chr12-121671882-121674008	Chr12:121671882-121674008	RNF34
Vps37b|Chr5:124049942-124050441	Chr12:122917347-122917864	Chr12-122916686-122918477	Chr12:122916686-122918477	VPS37B
Ache|Chr5:137029928-137030427	Chr7:101165406-101165924	Chr7-101162568-101166637	Chr7:101162568-101166637	ACHE
Hrh1|Chr6:114040886-114041385	Chr3:10706725-10707253	Chr3-10707014-10709565	Chr3:10707014-10709565	HRH1
Hrh1|Chr6:114697887-114698386	Chr3:11334989-11335283	Chr3-11334717-11335662	Chr3:11334717-11335662	HRH1
Prmt8|Chr6:127742373-127742872	Chr12:3531188-3531681	Chr12-3531571-3531746	Chr12:3531571-3531746	PRMT8
Hebp1|Chr6:135559403-135559902	Chr12:13390255-13390775	Chr12-13389800-13391248	Chr12:13389800-13391248	HEBP1
Mest|Chr6:30617773-30618272	Chr7:130352234-130352702	Chr7-130349819-130358299	Chr7:130349819-130358299	MEST
Tpra1|Chr6:88499973-88500472	Chr3:128075742-128077267	Chr3-128074255-128078259	Chr3:128074255-128078259	TPRA1
Plekha7|Chr7:116132019-116132518	Chr11:16785340-16786063	Chr11-16785094-16786339	Chr11:16785094-16786339	PLEKHA7
Irgq|Chr7:24364747-24365246	Chr19:43785213-43785697	Chr19-43784180-43785897	Chr19:43784180-43785897	IRGQ
Zfp536|Chr7:37373792-37374291	Chr19:30649982-30650247	Chr19-30645590-30651341	Chr19:30645590-30651341	ZNF536
Atp10a|Chr7:58788449-58788948	Chr15:25721116-25721653	Chr15-25721398-25721654	Chr15:25721398-25721654	ATP10A
Mtmr10|Chr7:64048291-64048790	Chr15:31215862-31216648	Chr15-31213936-31218975	Chr15:31213936-31218975	MTMR10
Pskh1|Chr8:105622236-105622735	Chr16:67546791-67547313	Chr16-67541227-67548972	Chr16:67541227-67548972	PSKH1
Cog4|Chr8:110645983-110646482	Chr16:70770992-70771913	Chr16-70769086-70772022	Chr16:70769086-70772022	COG4
Fam149a|Chr8:45454256-45454755	Chr4:186021423-186021993	Chr4-186021357-186022011	Chr4:186021357-186022011	FAM149A
Cacna1a|Chr8:84501918-84502417	Chr19:13398698-13399240	Chr19-13398879-13399450	Chr19:13398879-13399450	CACNA1A
Tox3|Chr8:89850063-89850562	Chr16:52069668-52070197	Chr16-52066207-52070755	Chr16:52066207-52070755	TOX3
Usp2|Chr9:43984513-43985012	Chr11:119474666-119475271	Chr11-119474065-119475757	Chr11:119474065-119475757	USP2
Dtx3|Chr10:127326134-127326633	Chr12:57475850-57476370	Chr12-57475035-57480142	Chr12:57475035-57480142	DTX3
Ddo|Chr10:40969286-40969785	Chr6:110069534-110070102	Chr6-110066296-110071252	Chr6:110066296-110071252	DDO
Psap|Chr10:59920868-59921367	Chr10:72309617-72310210	Chr10-72306900-72311750	Chr10:72306900-72311750	PSAP
Stox1|Chr10:62674545-62675044	Chr10:68871792-68872305	Chr10-68870908-68872379	Chr10:68870908-68872379	STOX1
Lrrc75b|Chr10:75436562-75437061	Chr22:24521677-24522182	Chr22-24521724-24522165	Chr22:24521724-24522165	LRRC75B
Cabin1|Chr10:75950631-75951130	Chr22:23750935-23751648	Chr22-23749135-23756843	Chr22:23749135-23756843	CABIN1
Sf3a2|Chr10:80747326-80747825	Chr19:2156020-2156340	Chr19-2148753-2157062	Chr19:2148753-2157062	SF3A2
Ramp2|Chr11:100893331-100893830	Chr17:42322555-42323205	Chr17-42321720-42325480	Chr17:42321720-42325480	RAMP2
Coasy|Chr11:101323518-101324017	Chr17:42843229-42843763	Chr17-42842960-42843962	Chr17:42842960-42843962	COASY
Cntn2|Chr1:132157323-132157822	Chr1:205482252-205486035	Chr1-205484618-205486444	Chr1:205484618-205486444	CNTN2
Mdm4|Chr1:133353323-133353822	Chr1:204162480-204163027	Chr1-204161892-204163255	Chr1:204161892-204163255	MDM4
Ddx59|Chr1:136116094-136116593	Chr1:201042912-201043361	Chr1-201038278-201043701	Chr1:201038278-201043701	DDX59
Cabp7|Chr11:4772828-4773327	Chr22:29689798-29690257	Chr22-29688409-29691258	Chr22:29688409-29691258	CABP7
Ccdc117|Chr11:5290637-5291136	Chr22:29040708-29041389	Chr22-29039868-29042076	Chr22:29039868-29042076	CCDC117
Kremen1|Chr11:5290637-5291136	Chr22:29040708-29041389	Chr22-29039868-29042076	Chr22:29039868-29042076	KREMEN1
Dvl2|Chr11:70247357-70247856	Chr17:7004770-7005241	Chr17-7004587-7006783	Chr17:7004587-7006783	DVL2
Arrb2|Chr11:70681826-70682325	Chr17:4980663-4981057	Chr17-4979737-4982750	Chr17:4979737-4982750	ARRB2
Mis12|Chr11:71345980-71346479	Chr17:5592409-5592680	Chr17-5592001-5593054	Chr17:5592001-5593054	MIS12
Dusp14|Chr11:84168814-84169313	Chr17:37373601-37373964	Chr17-37372965-37374144	Chr17:37372965-37374144	DUSP14
Srsf1|Chr11:88216106-88216605	Chr17:57833298-57833769	Chr17-57831901-57834896	Chr17:57831901-57834896	SRSF1
Traf5|Chr1:191964973-191965472	Chr1:211513928-211514349	Chr1-211513729-211516206	Chr1:211513729-211516206	TRAF5
Nudt14|Chr12:112873503-112874002	Chr14:105086792-105087292	Chr14-105086511-105088812	Chr14:105086511-105088812	NUDT14
Srp54c|Chr12:54985073-54985572	Chr14:34873788-34874362	Chr14-34871573-34875827	Chr14:34871573-34875827	SRP54
Ttc6|Chr12:57545635-57546134	Chr14:37594862-37595371	Chr14-37593962-37600197	Chr14:37593962-37600197	TTC6
Arf6|Chr12:69757670-69758169	Chr14:50342598-50343088	Chr14-50341549-50344180	Chr14:50341549-50344180	ARF6
Sos2|Chr12:69757670-69758169	Chr14:50342598-50343088	Chr14-50341549-50344180	Chr14:50341549-50344180	SOS2
Gpr135|Chr12:72407678-72408177	Chr14:59869745-59870245	Chr14-59865035-59872024	Chr14:59865035-59872024	GPR135
Smoc1|Chr12:80612318-80612817	Chr14:69364517-69365021	Chr14-69362653-69364797	Chr14:69362653-69364797	SMOC1
Nrde2|Chr12:99836359-99836858	Chr14:89912589-89913085	Chr14-89908746-89916014	Chr14:89908746-89916014	NRDE2
Nim1k|Chr13:119640421-119640920	Chr5:43389703-43390106	Chr5-43389267-43390762	Chr5:43389267-43390762	NIM1K
Rreb1|Chr13:37826485-37826984	Chr6:7108198-7108711	Chr6-7106463-7110389	Chr6:7106463-7110389	RREB1
Mylip|Chr13:45477192-45477691	Chr6:16206452-16206914	Chr6-16205505-16207145	Chr6:16205505-16207145	MYLIP
Pfdn5|Chr15:102316174-102316673	Chr12:53286910-53288126	Chr12-53286234-53288775	Chr12:53286234-53288775	PFDN5
Eif4b|Chr15:102376644-102377143	Chr12:53344547-53345084	Chr12-53341576-53348686	Chr12:53341576-53348686	EIF4B
Fbxl7|Chr15:26620177-26620676	Chr5:15824033-15824756	Chr5-15819845-15825081	Chr5:15819845-15825081	FBXL7
Mcat|Chr15:83408943-83409442	Chr22:42922192-42922728	Chr22-42922626-42923086	Chr22:42922626-42923086	MCAT
Masp1|Chr16:23452415-23452914	Chr3:187220104-187221073	Chr3-187219760-187221153	Chr3:187219760-187221153	MASP1
Sema5b|Chr16:35581254-35581753	Chr3:122993046-122993546	Chr3-122992413-122994281	Chr3:122992413-122994281	SEMA5B
Cfap44|Chr16:44331047-44331546	Chr3:113534162-113534752	Chr3-113532269-113534828	Chr3:113532269-113534828	CFAP44
Cd200|Chr16:45630259-45630758	Chr3:112111772-112112278	Chr3-112111221-112112614	Chr3:112111221-112112614	CD200
Nfkbiz|Chr16:55476718-55477217	Chr3:102228899-102229551	Chr3-102228838-102230267	Chr3:102228838-102230267	NFKBIZ
Atf6b|Chr17:35021098-35021597	Chr6:31769704-31770150	Chr6-31768616-31770197	Chr6:31768616-31770197	ATF6B
Vars2|Chr17:35549457-35549956	Chr6:31122872-31123326	Chr6-31122673-31124021	Chr6:31122673-31124021	VARS2
Slc35b2|Chr17:45748346-45748845	Chr6:44062775-44063315	Chr6-44060623-44065613	Chr6:44060623-44065613	SLC35B2
Myom1|Chr17:70737286-70737785	Chr18:3624847-3625207	Chr18-3623531-3625244	Chr18:3623531-3625244	MYOM1
Pkdcc|Chr17:82857440-82857939	Chr2:41698694-41699225	Chr2-41698421-41699242	Chr2:41698421-41699242	PKDCC
Apc|Chr18:34247406-34247905	Chr5:112737588-112738086	Chr5-112734713-112740850	Chr5:112734713-112740850	APC
Tmem109|Chr19:10831364-10831863	Chr11:60970323-60970803	Chr11-60970242-60971575	Chr11:60970242-60971575	TMEM109
Nmrk1|Chr19:18974952-18975451	Chr9:74644956-74645499	Chr9-74644966-74645446	Chr9:74644966-74645446	NMRK1
Mamdc2|Chr19:23162138-23162637	Chr9:70389999-70390589	Chr9-70387466-70394196	Chr9:70387466-70394196	MAMDC2
Mamdc2|Chr19:23224999-23225498	Chr9:70340764-70341052	Chr9-70340624-70341178	Chr9:70340624-70341178	MAMDC2
Mms19|Chr19:42196995-42197494	Chr10:97765623-97766218	Chr10-97765261-97765860	Chr10:97765261-97765860	MMS19
Scd2|Chr19:44311906-44312405	Chr10:100371102-100371650	Chr10-100369892-100378530	Chr10:100369892-100378530	SCD
Ganab|Chr19:8578132-8578631	Chr11:63024015-63024478	Chr11-63023136-63024847	Chr11:63023136-63024847	GANAB
Spred1|Chr2:117450434-117450933	Chr15:38699624-38700065	Chr15-38699601-38700064	Chr15:38699601-38700064	SPRED1
Bahd1|Chr2:118554290-118554789	Chr15:40115670-40116200	Chr15-40115339-40116425	Chr15:40115339-40116425	BAHD1
Slc12a1|Chr2:124651080-124651579	Chr15:47756945-47757521	Chr15-47756800-47757721	Chr15:47756800-47757721	SLC12A1
Lrsam1|Chr2:33156287-33156786	Chr9:127197855-127198406	Chr9-127196340-127200697	Chr9:127196340-127200697	LRSAM1
Gsn|Chr2:35637797-35638296	Chr9:121672101-121672622	Chr9-121671954-121672875	Chr9:121671954-121672875	GSN
Accs|Chr2:94246737-94247236	Chr11:43575411-43575914	Chr11-43575028-43577989	Chr11:43575028-43577989	ACCS
Slc6a17|Chr3:107505886-107506385	Chr1:110161794-110162287	Chr1-110161623-110162384	Chr1:110161623-110162384	SLC6A17
Cyb561d1|Chr3:108158531-108159030	Chr1:109535817-109536354	Chr1-109534601-109537480	Chr1:109534601-109537480	CYB561D1
Mfsd14a|Chr3:116422617-116423116	Chr1:100353311-100353801	Chr1-100350736-100355374	Chr1:100350736-100355374	MFSD14A
Rwdd3|Chr3:121489324-121489823	Chr1:94865433-94865894	Chr1-94862558-94867295	Chr1:94862558-94867295	RWDD3
Bcar3|Chr3:121967547-121968046	Chr1:94237286-94237923	Chr1-94236048-94238335	Chr1:94236048-94238335	BCAR3
Bcar3|Chr3:122078162-122078661	Chr1:94092156-94092640	Chr1-94092100-94097585	Chr1:94092100-94097585	BCAR3
Dchs2|Chr3:83098636-83099135	Chr4:154516293-154516795	Chr4-154516081-154519296	Chr4:154516081-154519296	DCHS2
Nsun4|Chr4:115962503-115963002	Chr1:46466835-46467769	Chr1-46465130-46467669	Chr1:46465130-46467669	NSUN4
Nsun4|Chr4:115963069-115963568	Chr1:46466195-46466767	Chr1-46465130-46467669	Chr1:46465130-46467669	NSUN4
9930104L06Rik|Chr4:124906122-124906621	Chr1:37726638-37727012	Chr1-37719789-37728470	Chr1:37719789-37728470	C1orf109
Marcksl1|Chr4:129585127-129585626	Chr1:32240918-32241435	Chr1-32238657-32243601	Chr1:32238657-32243601	MARCKSL1
Clic4|Chr4:135206234-135206733	Chr1:24847895-24848429	Chr1-24846539-24850238	Chr1:24846539-24850238	CLIC4
Pnrc2|Chr4:136081621-136082120	Chr1:23619465-23620033	Chr1-23619305-23619953	Chr1:23619305-23619953	PNRC2
Otud3|Chr4:138561901-138562400	Chr1:20361820-20362207	Chr1-20361177-20362583	Chr1:20361177-20362583	OTUD3
Lzic|Chr4:149255217-149255716	Chr1:10285460-10285988	Chr1-10284609-10289990	Chr1:10284609-10289990	LZIC
Clstn1|Chr4:149543067-149543566	Chr1:9874881-9875283	Chr1-9869891-9878451	Chr1:9869891-9878451	CLSTN1
Lyrm2|Chr4:32561194-32561693	Chr6:89951946-89952440	Chr6-89948249-89953433	Chr6:89948249-89953433	LYRM2
Zfp462|Chr4:55005422-55005921	Chr9:106921254-106921752	Chr9-106918820-106923208	Chr9:106918820-106923208	ZNF462
Vsig10|Chr5:117493398-117493897	Chr12:117875292-117875905	Chr12-117874473-117876549	Chr12:117874473-117876549	VSIG10
Orai1|Chr5:122925466-122925965	Chr12:121499971-121500396	Chr12-121499474-121501197	Chr12:121499474-121501197	ORAI1
Hmgb1|Chr5:149320357-149320856	Chr13:30791406-30791952	Chr13-30791378-30794167	Chr13:30791378-30794167	HMGB1
Shh|Chr5:28387474-28387973	Chr7:155737997-155738386	Chr7-155737754-155739253	Chr7:155737754-155739253	SHH
Zfp518b|Chr5:38469803-38470302	Chr4:10013692-10014271	Chr4-10013378-10015809	Chr4:10013378-10015809	ZNF518B
Grm3|Chr5:9344516-9345015	Chr7:87000270-87000733	Chr7-86999389-87005613	Chr7:86999389-87005613	GRM3
Cald1|Chr6:34708877-34709376	Chr7:134890843-134891344	Chr7-134885966-134894719	Chr7:134885966-134894719	CALD1
Osbpl3|Chr6:50526635-50527134	Chr7:25069560-25070483	Chr7-25069698-25070595	Chr7:25069698-25070595	OSBPL3
Aplf|Chr6:87384320-87384819	Chr2:68925344-68925845	Chr2-68925328-68925752	Chr2:68925328-68925752	APLF
Klf15|Chr6:90327558-90328057	Chr3:126522390-126522782	Chr3-126521474-126522881	Chr3:126521474-126522881	KLF15
Prickle2|Chr6:92641833-92642332	Chr3:64379122-64379592	Chr3-64379215-64379519	Chr3:64379215-64379519	PRICKLE2
Il18bp|Chr7:101620324-101620823	Chr11:72482201-72482726	Chr11-72482171-72482863	Chr11:72482171-72482863	IL18BP
Syt9|Chr7:107526234-107526733	Chr11:7442489-7443083	Chr11-7441630-7443139	Chr11:7441630-7443139	SYT9
Shank2|Chr7:144202557-144203056	Chr11:70778716-70779256	Chr11-70778718-70779286	Chr11:70778718-70779286	SHANK2
Isoc2b|Chr7:4509818-4510317	Chr19:55141114-55141857	Chr19-55140796-55142146	Chr19:55140796-55142146	ISOC2
Zfp791|Chr8:84934698-84935197	Chr19:12841114-12841618	Chr19-12840012-12841629	Chr19:12840012-12841629	ZNF791
Fbxw9|Chr8:84952764-84953263	Chr19:12828462-12828892	Chr19-12828502-12828825	Chr19:12828502-12828825	FBXW9
Ky|Chr9:102511337-102511836	Chr3:134644878-134645392	Chr3-134644399-134645511	Chr3:134644399-134645511	KY
Dag1|Chr9:107961792-107962291	Chr3:49841034-49841624	Chr3-49841093-49842455	Chr3:49841093-49842455	DAG1
Impdh2|Chr9:108401025-108401524	Chr3:49266842-49267443	Chr3-49265245-49267596	Chr3:49265245-49267596	IMPDH2
Qars|Chr9:108832323-108832822	Chr3:48656230-48656702	Chr3-48655134-48658318	Chr3:48655134-48658318	QARS
Ctdspl|Chr9:119033302-119033801	Chr3:37971098-37971646	Chr3-37971093-37972101	Chr3:37971093-37972101	CTDSPL
Robo3|Chr9:37177036-37177535	Chr11:125141649-125142137	Chr11-125141498-125142479	Chr11:125141498-125142479	ROBO3
Hspa8|Chr9:40982446-40982945	Chr11:122863657-122864173	Chr11-122863709-122864145	Chr11:122863709-122864145	HSPA8
C2cd2l|Chr9:43919882-43920381	Chr11:119533937-119534596	Chr11-119532913-119535070	Chr11:119532913-119535070	C2CD2L
Csk|Chr9:57468833-57469332	Chr15:74994289-74994843	Chr15-74991769-74997634	Chr15:74991769-74997634	CSK
Smad3|Chr9:63909456-63909955	Chr15:66862767-66863329	Chr15-66862756-66863276	Chr15:66862756-66863276	SMAD3
Parp16|Chr9:65120861-65121360	Chr15:65401394-65401890	Chr15-65400320-65402161	Chr15:65400320-65402161	PARP16
Trip4|Chr9:66275377-66275876	Chr15:63904267-63904816	Chr15-63903781-63906703	Chr15:63903781-63906703	TRIP4
Aph1c|Chr9:67213206-67213705	Chr15:62847669-62848355	Chr15-62847308-62848935	Chr15:62847308-62848935	APH1B
Zbtb38|Chr9:96818461-96818960	Chr3:141303359-141303878	Chr3-141302215-141306310	Chr3:141302215-141306310	ZBTB38
Pxylp1|Chr9:97068656-97069155	Chr3:140999995-141000593	Chr3-140999836-141000631	Chr3:140999836-141000631	PXYLP1
Fbxo30|Chr10:11449840-11450339	Chr6:145633926-145634461	Chr6-145633641-145634810	Chr6:145633641-145634810	FBXO30
Pip4k2c|Chr10:126905710-126906209	Chr12:57935749-57936423	Chr12-57935265-57936897	Chr12:57935265-57936897	PIP4K2C
Cdk4|Chr10:127350525-127351024	Chr12:57456086-57456579	Chr12-57455552-57456916	Chr12:57455552-57456916	CDK4
Rpl41|Chr10:128176313-128176812	Chr12:56521641-56522125	Chr12-56520353-56523715	Chr12:56520353-56523715	RPL41
Marcks|Chr10:37357675-37358174	Chr6:113611139-113611645	Chr6-113611172-113612217	Chr6:113611172-113612217	MARCKS
Cd164|Chr10:41288663-41289162	Chr6:109705264-109706839	Chr6-109704454-109706872	Chr6:109704454-109706872	CD164
Armc2|Chr10:41980670-41981169	Chr6:108893228-108894074	Chr6-108893292-108894147	Chr6:108893292-108894147	ARMC2
Asf1a|Chr10:53863363-53863862	Chr6:119148423-119148919	Chr6-119146851-119149518	Chr6:119146851-119149518	ASF1A
Ascc1|Chr10:59864986-59865485	Chr10:72364385-72364756	Chr10-72363483-72365239	Chr10:72363483-72365239	ASCC1
Ddit4|Chr10:59930929-59931428	Chr10:72297875-72298421	Chr10-72292472-72301789	Chr10:72292472-72301789	DDIT4
Psap|Chr10:59930929-59931428	Chr10:72297875-72298421	Chr10-72292472-72301789	Chr10:72292472-72301789	PSAP
Lrrc20|Chr10:61734407-61734906	Chr10:70116118-70116643	Chr10-70116133-70117131	Chr10:70116133-70117131	LRRC20
Tysnd1|Chr10:61734407-61734906	Chr10:70116118-70116643	Chr10-70116133-70117131	Chr10:70116133-70117131	TYSND1
Ipcef1|Chr10:7076081-7076580	Chr6:154370448-154370942	Chr6-154369801-154371534	Chr6:154369801-154371534	IPCEF1
Gucd1|Chr10:75635649-75636148	Chr22:24189609-24190087	Chr22-24189032-24191063	Chr22:24189032-24191063	GUCD1
Lrrc75b|Chr10:75704044-75704543	Chr22:24107707-24108207	Chr22-24101204-24108847	Chr22:24101204-24108847	LRRC75B
Mbd3|Chr10:80526082-80526581	Chr19:1789988-1791158	Chr19-1789680-1790104	Chr19:1789680-1790104	MBD3
Btbd2|Chr10:80928447-80928946	Chr19:2474667-2475030	Chr19-2472782-2480537	Chr19:2472782-2480537	BTBD2
Pias4|Chr10:81285649-81286148	Chr19:3721406-3721873	Chr19-3721118-3721990	Chr19:3721118-3721990	PIAS4
Ikbip|Chr10:91032275-91032774	Chr12:98698851-98699175	Chr12-98698494-98700022	Chr12:98698494-98700022	IKBIP
Ntn4|Chr10:93425592-93426091	Chr12:96070508-96071140	Chr12-96070566-96071376	Chr12:96070566-96071376	NTN4
Plxnc1|Chr10:94623495-94623994	Chr12:94532782-94533225	Chr12-94532565-94533611	Chr12:94532565-94533611	PLXNC1
Cep83|Chr10:94905585-94906084	Chr12:94186867-94187352	Chr12-94185403-94188154	Chr12:94185403-94188154	CEP83
Kat2a|Chr11:100362373-100362872	Chr17:41737859-41738551	Chr17-41737436-41739295	Chr17:41737436-41739295	KAT2A
Ramp2|Chr11:101200971-101201470	Chr17:42709979-42710503	Chr17-42709448-42710360	Chr17:42709448-42710360	RAMP2
Rnd2|Chr11:101459350-101459849	Chr17:43015232-43015761	Chr17-43015242-43015809	Chr17:43015242-43015809	RND2
Hdac5|Chr11:101937004-101937503	Chr17:43713432-43713903	Chr17-43713468-43714618	Chr17:43713468-43714618	HDAC5
Tmem101|Chr11:101937004-101937503	Chr17:43713432-43713903	Chr17-43713468-43714618	Chr17:43713468-43714618	TMEM101
Mpp2|Chr11:101968730-101969229	Chr17:43760250-43760728	Chr17-43760097-43761109	Chr17:43760097-43761109	MPP2
Grn|Chr11:102040075-102040574	Chr17:43846092-43846457	Chr17-43845486-43847397	Chr17:43845486-43847397	GRN
Mpp2|Chr11:102040075-102040574	Chr17:43846092-43846457	Chr17-43845486-43847397	Chr17:43845486-43847397	MPP2
Dusp3|Chr11:102053761-102054260	Chr17:43861446-43861960	Chr17-43860306-43862374	Chr17:43860306-43862374	DUSP3
Mpp2|Chr11:102053761-102054260	Chr17:43861446-43861960	Chr17-43860306-43862374	Chr17:43860306-43862374	MPP2
Mpp3|Chr11:102053761-102054260	Chr17:43861446-43861960	Chr17-43860306-43862374	Chr17:43860306-43862374	MPP3
Adam11|Chr11:102773780-102774279	Chr17:44774703-44775225	Chr17-44774098-44780845	Chr17:44774098-44780845	ADAM11
Plcd3|Chr11:102992838-102993337	Chr17:45022007-45022438	Chr17-45017860-45025025	Chr17:45017860-45025025	PLCD3
Fmnl1|Chr11:103358981-103359480	Chr17:45428111-45428502	Chr17-45427493-45433520	Chr17:45427493-45433520	FMNL1
Plcd3|Chr11:103358981-103359480	Chr17:45428111-45428502	Chr17-45427493-45433520	Chr17:45427493-45433520	PLCD3
Plcd3|Chr11:103360172-103360671	Chr17:45429355-45430050	Chr17-45427493-45433520	Chr17:45427493-45433520	PLCD3
Smarcd2|Chr11:106514938-106515437	Chr17:64156446-64157005	Chr17-64154206-64159625	Chr17:64154206-64159625	SMARCD2
Gna13|Chr11:109178712-109179211	Chr17:65294161-65294709	Chr17-65294117-65294647	Chr17:65294117-65294647	GNA13
Slc16a6|Chr11:109585002-109585501	Chr17:68436286-68436594	Chr17-68435967-68438829	Chr17:68435967-68438829	SLC16A6
Kctd2|Chr11:115083235-115083734	Chr17:74657398-74658393	Chr17-74657328-74658036	Chr17:74657328-74658036	KCTD2
Rab37|Chr11:115286231-115286730	Chr17:74882643-74883217	Chr17-74882449-74884164	Chr17:74882449-74884164	RAB37
Rnf213|Chr11:119389750-119390249	Chr17:80260547-80260837	Chr17-80257837-80265784	Chr17:80257837-80265784	RNF213
Tbc1d16|Chr11:119586789-119587288	Chr17:80523640-80524080	Chr17-80524004-80524276	Chr17:80524004-80524276	TBC1D16
Bahcc1|Chr11:120366386-120366885	Chr17:81534735-81535286	Chr17-81533016-81540194	Chr17:81533016-81540194	BAHCC1
Ccdc137|Chr11:120366386-120366885	Chr17:81534735-81535286	Chr17-81533016-81540194	Chr17:81533016-81540194	CCDC137
Rbbp5|Chr1:132655609-132656108	Chr1:204929285-204929836	Chr1-204927805-204931432	Chr1:204927805-204931432	RBBP5
Slu7|Chr11:43344446-43344945	Chr5:160511475-160512063	Chr5-160511110-160511941	Chr5:160511110-160511941	SLU7
Cabp7|Chr11:4761606-4762105	Chr22:29703506-29704085	Chr22-29700207-29707916	Chr22:29700207-29707916	CABP7
Tbc1d9b|Chr11:50421814-50422313	Chr5:179559406-179560012	Chr5-179557631-179561133	Chr5:179557631-179561133	TBC1D9B
Rad50|Chr11:54088787-54089286	Chr5:132238202-132238523	Chr5-132238007-132238864	Chr5:132238007-132238864	RAD50
P4ha2|Chr11:54112814-54113313	Chr5:132215333-132216310	Chr5-132214635-132216142	Chr5:132214635-132216142	P4HA2
P4ha2|Chr11:54122297-54122796	Chr5:132205699-132206245	Chr5-132205647-132205897	Chr5:132205647-132205897	P4HA2
BC034090|Chr1:155234248-155234747	Chr1:180926308-180926656	Chr1-180922884-180929787	Chr1:180922884-180929787	KIAA1614
BC034090|Chr1:155516449-155516948	Chr1:180533645-180534052	Chr1-180533248-180534570	Chr1:180533248-180534570	KIAA1614
Stx6|Chr1:155516449-155516948	Chr1:180533645-180534052	Chr1-180533248-180534570	Chr1:180533248-180534570	STX6
Top3a|Chr11:60559266-60559765	Chr17:18217530-18217943	Chr17-18215930-18219483	Chr17:18215930-18219483	TOP3A
Zswim7|Chr11:62495300-62495799	Chr17:16286500-16286965	Chr17-16285753-16288058	Chr17:16285753-16288058	ZSWIM7
Sat2|Chr11:69546285-69546784	Chr17:7717497-7718014	Chr17-7716252-7718475	Chr17:7716252-7718475	SAT2
Senp3|Chr11:69546285-69546784	Chr17:7717497-7718014	Chr17-7716252-7718475	Chr17:7716252-7718475	SENP3
Efnb3|Chr11:69802708-69803207	Chr17:7437971-7438500	Chr17-7433861-7442071	Chr17:7433861-7442071	EFNB3
Sat2|Chr11:69802708-69803207	Chr17:7437971-7438500	Chr17-7433861-7442071	Chr17:7433861-7442071	SAT2
Ncstn|Chr1:172562583-172563082	Chr1:159854962-159855466	Chr1-159853273-159856831	Chr1:159853273-159856831	NCSTN
Ctns|Chr11:73030752-73031251	Chr17:3879968-3880496	Chr17-3879014-3880361	Chr17:3879014-3880361	CTNS
Rph3al|Chr11:75894907-75895406	Chr17:299440-299917	Chr17-298758-299836	Chr17:298758-299836	RPH3AL
Rph3al|Chr11:76120573-76121072	Chr17:630847-631317	Chr17-631083-631581	Chr17:631083-631581	RPH3AL
Utp6|Chr11:79711336-79711835	Chr17:31559254-31559854	Chr17-31557133-31562817	Chr17:31557133-31562817	UTP6
Psen2|Chr1:180268547-180269046	Chr1:226827966-226829152	Chr1-226819380-226829224	Chr1:226819380-226829224	PSEN2
Disp1|Chr1:183442040-183442539	Chr1:222455055-222455585	Chr1-222454522-222455939	Chr1:222454522-222455939	DISP1
Tatdn3|Chr1:190868768-190869267	Chr1:213131769-213132288	Chr1-213131435-213133667	Chr1:213131435-213133667	TATDN3
Rcor3|Chr1:191817730-191818229	Chr1:211679875-211681138	Chr1-211679882-211682105	Chr1:211679882-211682105	RCOR3
Rsad1|Chr11:94970163-94970662	Chr17:50169262-50169794	Chr17-50168338-50170262	Chr17:50168338-50170262	RSAD1
Itga3|Chr11:95259051-95259550	Chr17:49851209-49851501	Chr17-49850475-49852393	Chr17:49850475-49852393	ITGA3
Tbkbp1|Chr11:96903142-96903641	Chr17:47987166-47987697	Chr17-47987149-47987968	Chr17:47987149-47987968	TBKBP1
Osbpl7|Chr11:97021742-97022241	Chr17:47847650-47848149	Chr17-47846929-47848108	Chr17:47846929-47848108	OSBPL7
Cwc25|Chr11:98035819-98036318	Chr17:39209618-39210089	Chr17-39206560-39210666	Chr17:39206560-39210666	CWC25
Cwc25|Chr11:98075328-98075827	Chr17:39244591-39245199	Chr17-39244010-39245392	Chr17:39244010-39245392	CWC25
Med1|Chr11:98344981-98345480	Chr17:39623234-39623634	Chr17-39616778-39624501	Chr17:39616778-39624501	MED1
Tunar|Chr12:105336437-105336936	Chr14:95876093-95876544	Chr14-95875797-95877551	Chr14:95875797-95877551	TUNAR
Akt1|Chr12:112722410-112722909	Chr14:104865529-104865988	Chr14-104863092-104869553	Chr14:104863092-104869553	AKT1
Iah1|Chr12:21132241-21132740	Chr2:9230306-9230903	Chr2-9229324-9232282	Chr2:9229324-9232282	IAH1
Sox11|Chr12:27248453-27248952	Chr2:5839478-5839975	Chr2-5839498-5839957	Chr2:5839498-5839957	SOX11
Nampt|Chr12:32897399-32897898	Chr7:106176591-106177296	Chr7-106176405-106177976	Chr7:106176405-106177976	NAMPT
Ahr|Chr12:35182593-35183092	Chr7:17706690-17707225	Chr7-17706687-17707182	Chr7:17706687-17707182	AHR
Sdhaf4|Chr1:23826997-23827496	Chr6:70884315-70884888	Chr6-70884046-70884997	Chr6:70884046-70884997	SDHAF4
Ppp2r3c|Chr12:55498952-55499451	Chr14:35413079-35413642	Chr14-35411474-35414076	Chr14:35411474-35414076	PPP2R3C
Sav1|Chr12:69907890-69908389	Chr14:50560198-50560814	Chr14-50557934-50564615	Chr14:50557934-50564615	SAV1
Dpf3|Chr12:83337301-83337800	Chr14:72737062-72737585	Chr14-72736469-72738712	Chr14:72736469-72738712	DPF3
Dnal1|Chr12:83800839-83801338	Chr14:73283836-73284401	Chr14-73283776-73284602	Chr14:73283776-73284602	DNAL1
Eif2b2|Chr12:85305403-85305902	Chr14:75088463-75088959	Chr14-75088309-75089505	Chr14:75088309-75089505	EIF2B2
Fos|Chr12:85455680-85456179	Chr14:75259452-75259934	Chr14-75256703-75260595	Chr14:75256703-75260595	FOS
Zdhhc22|Chr12:86867558-86868057	Chr14:77007784-77008241	Chr14-77006987-77008526	Chr14:77006987-77008526	ZDHHC22
Irf2bpl|Chr12:87000537-87001036	Chr14:77152077-77152506	Chr14-77151077-77153325	Chr14:77151077-77153325	IRF2BPL
Ptpn21|Chr12:98734426-98734925	Chr14:88551275-88551937	Chr14-88549610-88555957	Chr14:88549610-88555957	PTPN21
Ak6|Chr13:100939548-100940047	Chr5:68962853-68963390	Chr5-68962182-68963493	Chr5:68962182-68963493	TAF9
Mast4|Chr13:103096602-103097101	Chr5:66828553-66829030	Chr5-66826512-66833678	Chr5:66826512-66833678	MAST4
Tubb2b|Chr13:34046315-34046814	Chr6:3126231-3127270	Chr6-3125766-3127335	Chr6:3125766-3127335	TUBB2B
Nedd9|Chr13:41358707-41359206	Chr6:11232368-11232884	Chr6-11231097-11234198	Chr6:11231097-11234198	NEDD9
Gfod1|Chr13:43131727-43132226	Chr6:13281887-13282398	Chr6-13281636-13282179	Chr6:13281636-13282179	GFOD1
Npas2|Chr1:38856102-38856601	Chr2:100381095-100381684	Chr2-100381091-100381679	Chr2:100381091-100381679	NPAS2
Serinc5|Chr13:92750915-92751414	Chr5:80083440-80084002	Chr5-80081875-80087296	Chr5:80081875-80087296	SERINC5
Mtx3|Chr13:92751679-92752178	Chr5:80082715-80083205	Chr5-80081875-80087296	Chr5:80081875-80087296	MTX3
Serinc5|Chr13:92751679-92752178	Chr5:80082715-80083205	Chr5-80081875-80087296	Chr5:80081875-80087296	SERINC5
Arhgef28|Chr13:98390978-98391477	Chr5:73419569-73420099	Chr5-73416968-73420255	Chr5:73416968-73420255	ARHGEF28
Stk24|Chr14:121279010-121279509	Chr13:98445266-98445763	Chr13-98444570-98449023	Chr13:98444570-98449023	STK24
Rab2b|Chr14:52316004-52316503	Chr14:21526019-21526527	Chr14-21522815-21527438	Chr14:21522815-21527438	RAB2B
Cmtm5|Chr14:54494141-54494640	Chr14:22900139-22900672	Chr14-22899329-22901092	Chr14:22899329-22901092	CMTM5
Ngdn|Chr14:54714591-54715090	Chr14:23121263-23121774	Chr14-23118367-23122432	Chr14:23118367-23122432	NGDN
Haus4|Chr14:54995421-54995920	Chr14:23436570-23437155	Chr14-23435385-23437813	Chr14:23435385-23437813	HAUS4
Khnyn|Chr14:55497220-55497719	Chr14:24058237-24058735	Chr14-24056171-24060401	Chr14:24056171-24060401	KHNYN
Gmpr2|Chr14:55520489-55520988	Chr14:24081172-24081645	Chr14-24079202-24083142	Chr14:24079202-24083142	GMPR2
Khnyn|Chr14:55520489-55520988	Chr14:24081172-24081645	Chr14-24079202-24083142	Chr14:24079202-24083142	KHNYN
Mdp1|Chr14:55781172-55781671	Chr14:24332117-24332613	Chr14-24331112-24335442	Chr14:24331112-24335442	MDP1
Fam124a|Chr14:62492391-62492890	Chr13:51125658-51126212	Chr13-51125490-51126194	Chr13:51125490-51126194	FAM124A
Pnma2|Chr14:66909633-66910132	Chr8:26514979-26515500	Chr8-26511511-26515501	Chr8:26511511-26515501	PNMA2
Bin3|Chr14:69830536-69831035	Chr8:22974080-22974526	Chr8-22972354-22976630	Chr8:22972354-22976630	BIN3
Rcbtb2|Chr14:73116806-73117305	Chr13:48571486-48571860	Chr13-48569435-48572528	Chr13:48569435-48572528	RCBTB2
Csrnp2|Chr15:100682952-100683451	Chr12:51341309-51341811	Chr12-51340914-51342740	Chr12:51340914-51342740	CSRNP2
Csrnp2|Chr15:100838770-100839269	Chr12:51531867-51532286	Chr12-51531325-51532522	Chr12:51531325-51532522	CSRNP2
Nr4a1|Chr15:100838770-100839269	Chr12:51531867-51532286	Chr12-51531325-51532522	Chr12:51531325-51532522	NR4A1
Nr4a1|Chr15:100983636-100984135	Chr12:51721499-51722005	Chr12-51721291-51722177	Chr12:51721291-51722177	NR4A1
Nr4a1|Chr15:101497113-101497612	Chr12:52327415-52327777	Chr12-52326888-52328420	Chr12:52326888-52328420	NR4A1
Sema5a|Chr15:31999438-31999937	Chr5:9838849-9839402	Chr5-9838789-9839378	Chr5:9838789-9839378	SEMA5A
Slc25a32|Chr15:39217191-39217690	Chr8:103511993-103512485	Chr8-103511765-103512666	Chr8:103511765-103512666	SLC25A32
Tyw5|Chr1:57428892-57429391	Chr2:199980004-199980535	Chr2-199979403-199980680	Chr2:199979403-199980680	TYW5
Scrt1|Chr15:76307094-76307593	Chr8:144060466-144060950	Chr8-144056507-144065141	Chr8:144056507-144065141	SCRT1
Nup155|Chr15:7812716-7813215	Chr5:37837272-37837803	Chr5-37831725-37841360	Chr5:37831725-37841360	NUP155
Gga1|Chr15:78514514-78515013	Chr22:37166319-37166731	Chr22-37165918-37167581	Chr22:37165918-37167581	GGA1
Josd1|Chr15:79950084-79950583	Chr22:39174069-39174715	Chr22-39169524-39178023	Chr22:39169524-39178023	JOSD1
Tab1|Chr15:79950084-79950583	Chr22:39174069-39174715	Chr22-39169524-39178023	Chr22:39169524-39178023	TAB1
Cbx7|Chr15:79957986-79958485	Chr22:39182403-39184106	Chr22-39183334-39186467	Chr22:39183334-39186467	CBX7
Cyb5r3|Chr15:83408943-83409442	Chr22:42922192-42922728	Chr22-42922626-42923086	Chr22:42922626-42923086	CYB5R3
Pdzrn4|Chr15:92160868-92161367	Chr12:40827512-40828008	Chr12-40827644-40828965	Chr12:40827644-40828965	PDZRN4
Rpap3|Chr15:97606521-97607020	Chr12:47576146-47576661	Chr12-47576179-47576780	Chr12:47576179-47576780	RPAP3
Rpap3|Chr15:98108241-98108740	Chr12:48119019-48119531	Chr12-48118826-48120206	Chr12:48118826-48120206	RPAP3
Kmt2d|Chr15:98617123-98617622	Chr12:48795782-48796305	Chr12-48795036-48796468	Chr12:48795036-48796468	KMT2D
Lmbr1l|Chr15:98617123-98617622	Chr12:48795782-48796305	Chr12-48795036-48796468	Chr12:48795036-48796468	LMBR1L
Fkbp11|Chr15:98880606-98881105	Chr12:49069135-49069683	Chr12-49068265-49071142	Chr12:49068265-49071142	FKBP11
Tuba1a|Chr15:99265624-99266123	Chr12:49580292-49580807	Chr12-49579955-49581327	Chr12:49579955-49581327	TUBA1A
Lima1|Chr15:99664394-99664893	Chr12:50050405-50050897	Chr12-50050068-50052118	Chr12:50050068-50052118	LIMA1
Txndc11|Chr16:10879383-10879882	Chr16:11407273-11407851	Chr16-11407231-11408143	Chr16:11407231-11408143	TXNDC11
Trmt2a|Chr16:18088944-18089443	Chr22:20298968-20299975	Chr22-20298384-20300175	Chr22:20298384-20300175	TRMT2A
Tmem41a|Chr16:21627921-21628420	Chr3:185045233-185046051	Chr3-185045626-185046027	Chr3:185045626-185046027	TMEM41A
Mb21d2|Chr16:28517757-28518256	Chr3:192467171-192467690	Chr3-192467159-192468040	Chr3:192467159-192468040	MB21D2
Lsg1|Chr16:30510411-30510910	Chr3:194583407-194584337	Chr3-194581818-194589102	Chr3:194581818-194589102	LSG1
Fbxo45|Chr16:32499590-32500089	Chr3:196206977-196207774	Chr3-196206543-196209755	Chr3:196206543-196209755	FBXO45
Sema5b|Chr16:35603715-35604214	Chr3:122969893-122970437	Chr3-122969442-122970969	Chr3:122969442-122970969	SEMA5B
Cpox|Chr16:58522848-58523347	Chr3:98732698-98733233	Chr3-98731351-98735418	Chr3:98731351-98735418	CPOX
Arl13b|Chr16:62826068-62826567	Chr3:94004289-94004816	Chr3-94003879-94004898	Chr3:94003879-94004898	ARL13B
Slc5a3|Chr16:92399943-92400442	Chr21:34526710-34527190	Chr21-34526228-34527427	Chr21:34526228-34527427	SLC5A3
Tnfrsf12a|Chr17:23586027-23586526	Chr16:3112371-3112798	Chr16-3111401-3114445	Chr16:3111401-3114445	TNFRSF12A
Kctd5|Chr17:24199600-24200099	Chr16:2482500-2483083	Chr16-2480458-2484935	Chr16:2480458-2484935	KCTD5
Baiap3|Chr17:25397778-25398277	Chr16:1194595-1195038	Chr16-1193393-1195232	Chr16:1193393-1195232	BAIAP3
Taf11|Chr17:28084881-28085380	Chr6:35145900-35146866	Chr6-35146014-35147244	Chr6:35146014-35147244	TAF11
Smarcal1|Chr1:72865740-72866239	Chr2:216681050-216683574	Chr2-216681267-216684408	Chr2:216681267-216684408	SMARCAL1
March4|Chr1:72877788-72878287	Chr2:216698773-216699249	Chr2-216690623-216699419	Chr2:216690623-216699419	2025-03-04
Smarcal1|Chr1:72877788-72878287	Chr2:216698773-216699249	Chr2-216690623-216699419	Chr2:216690623-216699419	SMARCAL1
Brpf3|Chr17:28869648-28870147	Chr6:36285046-36285543	Chr6-36285099-36285596	Chr6:36285099-36285596	BRPF3
Lhfpl5|Chr17:28869648-28870147	Chr6:36285046-36285543	Chr6-36285099-36285596	Chr6:36285099-36285596	LHFPL5
Ccdc167|Chr17:29895964-29896463	Chr6:37705476-37705833	Chr6-37704156-37706975	Chr6:37704156-37706975	CCDC167
Skiv2l|Chr17:34605541-34606040	Chr6:32175950-32176487	Chr6-32174626-32180530	Chr6:32174626-32180530	SKIV2L
Bag6|Chr17:34671648-34672147	Chr6:32096350-32096849	Chr6-32095542-32097625	Chr6:32095542-32097625	BAG6
Bag6|Chr17:35021098-35021597	Chr6:31769704-31770150	Chr6-31768616-31770197	Chr6:31768616-31770197	BAG6
Mrps18b|Chr17:35556771-35557270	Chr6:31114990-31115408	Chr6-31113133-31118432	Chr6:31113133-31118432	MRPS18B
Mrps18b|Chr17:35725503-35726002	Chr6:30828420-30828968	Chr6-30827164-30831317	Chr6:30827164-30831317	MRPS18B
H2-T23|Chr17:35777160-35777659	Chr6:30781445-30781866	Chr6-30778086-30783976	Chr6:30778086-30783976	HLA-E
Trim39|Chr17:35777160-35777659	Chr6:30781445-30781866	Chr6-30778086-30783976	Chr6:30778086-30783976	TRIM39
Znrd1|Chr17:36946908-36947407	Chr6:30071339-30071866	Chr6-30070719-30072007	Chr6:30070719-30072007	ZNRD1
Enpp4|Chr17:43882950-43883449	Chr6:46410315-46410765	Chr6-46406712-46413506	Chr6:46406712-46413506	ENPP4
Cdc5l|Chr17:45374123-45374622	Chr6:44475864-44476150	Chr6-44475283-44478980	Chr6:44475283-44478980	CDC5L
Tmem151b|Chr17:45374123-45374622	Chr6:44475864-44476150	Chr6-44475283-44478980	Chr6:44475283-44478980	TMEM151B
Cdc5l|Chr17:45731070-45731569	Chr6:44079090-44079767	Chr6-44072250-44080462	Chr6:44072250-44080462	CDC5L
Gtpbp2|Chr17:45731070-45731569	Chr6:44079090-44079767	Chr6-44072250-44080462	Chr6:44072250-44080462	GTPBP2
Mrpl14|Chr17:45731070-45731569	Chr6:44079090-44079767	Chr6-44072250-44080462	Chr6:44072250-44080462	MRPL14
Klc4|Chr17:46552671-46553170	Chr6:43174504-43175002	Chr6-43169494-43176893	Chr6:43169494-43176893	KLC4
Klc4|Chr17:46889292-46889791	Chr6:42746935-42747459	Chr6-42744576-42750179	Chr6:42744576-42750179	KLC4
Frs3|Chr17:47511005-47511504	Chr6:42044232-42044586	Chr6-42043399-42051891	Chr6:42043399-42051891	FRS3
Foxp4|Chr17:47628752-47629251	Chr6:41895699-41896258	Chr6-41892919-41896557	Chr6:41892919-41896557	FOXP4
Tfeb|Chr17:48057324-48057823	Chr6:41413162-41413688	Chr6-41411807-41418476	Chr6:41411807-41418476	TFEB
Dnajb2|Chr1:74816742-74817241	Chr2:218908917-218909508	Chr2-218908520-218909669	Chr2:218908520-218909669	DNAJB2
Dnpep|Chr1:74926614-74927113	Chr2:219029586-219030085	Chr2-219023131-219031878	Chr2:219023131-219031878	DNPEP
Ptprm|Chr17:67451921-67452420	Chr18:7460154-7460668	Chr18-7458344-7461934	Chr18:7458344-7461934	PTPRM
Zbtb14|Chr17:69157193-69157692	Chr18:5542814-5543385	Chr18-5542435-5544452	Chr18:5542435-5544452	ZBTB14
Slc3a1|Chr17:85189500-85189999	Chr2:44479368-44479843	Chr2-44478865-44480441	Chr2:44478865-44480441	SLC3A1
Serpine2|Chr1:79450196-79450695	Chr2:223612908-223613446	Chr2-223612582-223613924	Chr2:223612582-223613924	SERPINE2
Pcdhb17|Chr18:37883399-37883898	Chr5:141564073-141564568	Chr5-141562966-141565012	Chr5:141562966-141565012	PCDHB16
Pcdh1|Chr18:38296386-38296885	Chr5:141968763-141969326	Chr5-141967382-141970768	Chr5:141967382-141970768	PCDH1
Jakmip2|Chr18:43726932-43727431	Chr5:147822679-147823128	Chr5-147821950-147823182	Chr5:147821950-147823182	JAKMIP2
Mcc|Chr18:45015641-45016140	Chr5:113807450-113807949	Chr5-113806105-113808072	Chr5:113806105-113808072	MCC
Pcyox1l|Chr18:61482192-61482691	Chr5:149646569-149647204	Chr5-149646601-149646976	Chr5:149646601-149646976	PCYOX1L
Impa2|Chr18:67324250-67324749	Chr18:12038921-12039398	Chr18-12038150-12039594	Chr18:12038150-12039594	IMPA2
Rnmt|Chr18:68157384-68157883	Chr18:13501155-13501637	Chr18-13499410-13503784	Chr18:13499410-13503784	RNMT
4930503L19Rik|Chr18:70652111-70652610	Chr18:54127706-54128230	Chr18-54127246-54128707	Chr18:54127246-54128707	C18orf54
Zbtb7c|Chr18:76059283-76059782	Chr18:48136824-48137335	Chr18-48135772-48137306	Chr18:48135772-48137306	ZBTB7C
Zbtb7c|Chr18:76144309-76144808	Chr18:48030953-48031363	Chr18-48030765-48031840	Chr18:48030765-48031840	ZBTB7C
Sh3bp4|Chr1:88745214-88745713	Chr2:234550461-234551030	Chr2-234550289-234551271	Chr2:234550289-234551271	SH3BP4
Ramp1|Chr1:91209207-91209706	Chr2:237895446-237895969	Chr2-237893231-237899749	Chr2:237893231-237899749	RAMP1
Fam111a|Chr19:12517737-12518236	Chr11:59158381-59158807	Chr11-59158020-59159229	Chr11:59158020-59159229	FAM111A
Tctn3|Chr19:40225340-40225839	Chr10:95242887-95243462	Chr10-95242796-95243643	Chr10:95242796-95243643	TCTN3
Exosc1|Chr19:42315875-42316374	Chr10:97914663-97915213	Chr10-97913661-97918661	Chr10:97913661-97918661	EXOSC1
Pdzd7|Chr19:45176867-45177366	Chr10:101161869-101162169	Chr10-101161636-101162491	Chr10:101161636-101162491	PDZD7
Sema4g|Chr19:45176867-45177366	Chr10:101161869-101162169	Chr10-101161636-101162491	Chr10:101161636-101162491	SEMA4G
Nolc1|Chr19:45717425-45717924	Chr10:101749092-101749520	Chr10-101748984-101750172	Chr10:101748984-101750172	NOLC1
Nolc1|Chr19:46317803-46318302	Chr10:102409044-102409577	Chr10-102408118-102411992	Chr10:102408118-102411992	NOLC1
Sfxn2|Chr19:46962102-46962601	Chr10:103193056-103193532	Chr10-103190444-103194722	Chr10:103190444-103194722	SFXN2
Men1|Chr19:6268053-6268552	Chr11:64887938-64888328	Chr11-64887122-64889533	Chr11:64887122-64889533	MEN1
Zfpl1|Chr19:6268053-6268552	Chr11:64887938-64888328	Chr11-64887122-64889533	Chr11:64887122-64889533	ZFPL1
Ldlrad3|Chr2:102077426-102077925	Chr11:36069817-36070366	Chr11-36069195-36075378	Chr11:36069195-36075378	LDLRAD3
Vps18|Chr2:118883278-118883777	Chr15:40421829-40422288	Chr15-40419731-40422874	Chr15:40419731-40422874	VPS18
Pak6|Chr2:118972591-118973090	Chr15:40507008-40507478	Chr15-40506835-40507723	Chr15:40506835-40507723	PAK6
Ganc|Chr2:120068867-120069366	Chr15:41876781-41877334	Chr15-41876181-41877156	Chr15:41876181-41877156	GANC
Shc4|Chr2:125865924-125866423	Chr15:49169814-49170422	Chr15-49168915-49172651	Chr15:49168915-49172651	SHC4
Ubox5|Chr2:130597395-130597894	Chr20:3115405-3116129	Chr20-3115101-3116357	Chr20:3115101-3116357	UBOX5
Tmem230|Chr2:132315988-132316487	Chr20:5205541-5205889	Chr20-5204025-5206863	Chr20:5204025-5206863	TMEM230
Ankef1|Chr2:136449192-136449691	Chr20:9912752-9913310	Chr20-9912805-9913426	Chr20:9912805-9913426	ANKEF1
Flrt3|Chr2:140500862-140501361	Chr20:14141967-14142516	Chr20-14142021-14142764	Chr20:14142021-14142764	FLRT3
Cst3|Chr2:148751804-148752303	Chr20:23441394-23442222	Chr20-23441554-23442596	Chr20:23441554-23442596	CST3
Napb|Chr2:148751804-148752303	Chr20:23441394-23442222	Chr20-23441554-23442596	Chr20:23441554-23442596	NAPB
Sox12|Chr2:152029103-152029602	Chr20:728309-728852	Chr20-727996-728823	Chr20:727996-728823	SOX12
Pxmp4|Chr2:154682961-154683460	Chr20:33841028-33841561	Chr20-33838042-33841726	Chr20:33838042-33841726	PXMP4
Edem2|Chr2:155764725-155765224	Chr20:35208047-35208585	Chr20-35207859-35208988	Chr20:35207859-35208988	EDEM2
Ppp1r16b|Chr2:158284496-158284995	Chr20:38337462-38338162	Chr20-38334032-38340694	Chr20:38334032-38340694	PPP1R16B
Chd6|Chr2:161177650-161178149	Chr20:41692951-41693485	Chr20-41691916-41694928	Chr20:41691916-41694928	CHD6
L3mbtl1|Chr2:163152536-163153035	Chr20:43824530-43825067	Chr20-43824384-43825507	Chr20:43824384-43825507	L3MBTL1
L3mbtl1|Chr2:163204191-163204690	Chr20:43915866-43916371	Chr20-43914327-43917355	Chr20:43914327-43917355	L3MBTL1
Dnttip1|Chr2:165152925-165153424	Chr20:46222605-46223113	Chr20-46222501-46223217	Chr20:46222501-46223217	DNTTIP1
Zswim3|Chr2:165152925-165153424	Chr20:46222605-46223113	Chr20-46222501-46223217	Chr20:46222501-46223217	ZSWIM3
Cdh22|Chr2:165529051-165529550	Chr20:46757917-46758386	Chr20-46758018-46758683	Chr20:46758018-46758683	CDH22
Znfx1|Chr2:167219279-167219778	Chr20:49534115-49534669	Chr20-49534170-49534665	Chr20:49534170-49534665	ZNFX1
Ogfr|Chr2:180745183-180745682	Chr20:62971809-62972774	Chr20-62972059-62973620	Chr20:62972059-62973620	OGFR
Chrna4|Chr2:180996357-180996856	Chr20:63309335-63309920	Chr20-63306520-63310914	Chr20:63306520-63310914	CHRNA4
Zbtb46|Chr2:181307022-181307521	Chr20:63641642-63642427	Chr20-63639077-63644691	Chr20:63639077-63644691	ZBTB46
Tbc1d13|Chr2:30270010-30270509	Chr9:128927511-128928178	Chr9-128924858-128929234	Chr9:128924858-128929234	TBC1D13
Tor1b|Chr2:30684969-30685468	Chr9:129451337-129451698	Chr9-129450863-129453099	Chr9:129450863-129453099	TOR1B
Sh2d3c|Chr2:32679956-32680455	Chr9:127816926-127817576	Chr9-127814862-127819839	Chr9:127814862-127819839	SH2D3C
Slc25a25|Chr2:32679956-32680455	Chr9:127816926-127817576	Chr9-127814862-127819839	Chr9:127814862-127819839	SLC25A25
Tor2a|Chr2:32679956-32680455	Chr9:127816926-127817576	Chr9-127814862-127819839	Chr9:127814862-127819839	TOR2A
Angptl2|Chr2:33154629-33155128	Chr9:127199270-127199863	Chr9-127196340-127200697	Chr9:127196340-127200697	ANGPTL2
Zbtb43|Chr2:33154629-33155128	Chr9:127199270-127199863	Chr9-127196340-127200697	Chr9:127196340-127200697	ZBTB43
Zbtb43|Chr2:33558163-33558662	Chr9:126705079-126705527	Chr9-126704532-126706825	Chr9:126704532-126706825	ZBTB43
Fbxw2|Chr2:34904821-34905320	Chr9:120868742-120869069	Chr9-120867698-120870835	Chr9:120867698-120870835	FBXW2
Dab2ip|Chr2:35581754-35582253	Chr9:121598327-121598879	Chr9-121597947-121601803	Chr9:121597947-121601803	DAB2IP
Dennd1a|Chr2:38592011-38592510	Chr9:124357991-124358607	Chr9-124352028-124358905	Chr9:124352028-124358905	DENND1A
Tnks1bp1|Chr2:84617745-84618244	Chr11:57800630-57801126	Chr11-57798877-57802029	Chr11:57798877-57802029	TNKS1BP1
Mtch2|Chr2:90866456-90866955	Chr11:47616919-47617495	Chr11-47616922-47617507	Chr11:47616922-47617507	MTCH2
Pex16|Chr2:91921647-91922146	Chr11:46391815-46392327	Chr11-46389007-46393540	Chr11:46389007-46393540	PEX16
Pex16|Chr2:92712336-92712835	Chr11:45500383-45500974	Chr11-45500386-45500866	Chr11:45500386-45500866	PEX16
Trp53i11|Chr2:93076140-93076639	Chr11:45092824-45093476	Chr11-45093191-45094208	Chr11:45093191-45094208	TP53I11
Accs|Chr2:94245195-94245694	Chr11:43576978-43577514	Chr11-43575028-43577989	Chr11:43575028-43577989	ACCS
Rbm15|Chr3:107205939-107206438	Chr1:110495955-110496464	Chr1-110494903-110496733	Chr1:110494903-110496733	RBM15
Ahcyl1|Chr3:107411648-107412147	Chr1:110255404-110255926	Chr1-110254933-110256105	Chr1:110254933-110256105	AHCYL1
Atxn7l2|Chr3:108164671-108165170	Chr1:109532107-109532745	Chr1-109528982-109534089	Chr1:109528982-109534089	ATXN7L2
Taf13|Chr3:108164671-108165170	Chr1:109532107-109532745	Chr1-109528982-109534089	Chr1:109528982-109534089	TAF13
Stxbp3|Chr3:108961073-108961572	Chr1:108646375-108647335	Chr1-108644915-108647692	Chr1:108644915-108647692	STXBP3
Dbt|Chr3:116423302-116423801	Chr1:100352675-100353114	Chr1-100350736-100355374	Chr1:100350736-100355374	DBT
Pla2g12a|Chr3:130060068-130060567	Chr4:109434003-109434553	Chr4-109432384-109437722	Chr4:109432384-109437722	PLA2G12A
Dkk2|Chr3:131975855-131976354	Chr4:107183118-107183571	Chr4-107183058-107183624	Chr4:107183058-107183624	DKK2
Ssx2ip|Chr3:146345127-146345626	Chr1:84753468-84753989	Chr1-84753102-84754794	Chr1:84753102-84754794	SSX2IP
Tyw3|Chr3:154269637-154270136	Chr1:75203669-75204215	Chr1-75203432-75204116	Chr1:75203432-75204116	TYW3
Eif5a2|Chr3:28746056-28746555	Chr3:170961507-170961999	Chr3-170960466-170962841	Chr3:170960466-170962841	EIF5A2
Foxo1|Chr3:52543194-52543693	Chr13:40336183-40336720	Chr13-40336472-40336608	Chr13:40336472-40336608	FOXO1
Wwtr1|Chr3:57666931-57667430	Chr3:149768883-149769350	Chr3-149765177-149773229	Chr3:149765177-149773229	WWTR1
Gatb|Chr3:85313780-85314279	Chr4:152010546-152011041	Chr4-152009024-152011258	Chr4:152009024-152011258	GATB
Slc25a44|Chr3:88071708-88072207	Chr1:156584020-156584490	Chr1-156581967-156585168	Chr1:156581967-156585168	SLC25A44
Pygo2|Chr3:89340438-89340937	Chr1:155061414-155061937	Chr1-155059941-155064767	Chr1:155059941-155064767	PYGO2
Pygo2|Chr3:89421307-89421806	Chr1:154970569-154971077	Chr1-154967600-154976831	Chr1:154967600-154976831	PYGO2
Adam15|Chr3:89510944-89511443	Chr1:154879541-154880029	Chr1-154877708-154879635	Chr1:154877708-154879635	ADAM15
Krtcap2|Chr3:89510944-89511443	Chr1:154879541-154880029	Chr1-154877708-154879635	Chr1:154877708-154879635	KRTCAP2
Pygo2|Chr3:89688613-89689112	Chr1:154669653-154670115	Chr1-154669528-154670301	Chr1:154669528-154670301	PYGO2
Jtb|Chr3:89953380-89953879	Chr1:154334957-154335460	Chr1-154333401-154335983	Chr1:154333401-154335983	JTB
Tpm3|Chr3:89953380-89953879	Chr1:154334957-154335460	Chr1-154333401-154335983	Chr1:154333401-154335983	TPM3
Dennd4b|Chr3:90079343-90079842	Chr1:154183008-154183507	Chr1-154181811-154184326	Chr1:154181811-154184326	DENND4B
Lor|Chr3:92080355-92080854	Chr1:153261640-153262041	Chr1-153260405-153262151	Chr1:153260405-153262151	LOR
Aph1a|Chr3:96147895-96148394	Chr1:149962190-149962524	Chr1-149961310-149964861	Chr1:149961310-149964861	APH1A
Pex11b|Chr3:96526884-96527383	Chr1:146019373-146019886	Chr1-146019082-146020158	Chr1:146019082-146020158	PEX11B
Polr3gl|Chr3:96526884-96527383	Chr1:146019373-146019886	Chr1-146019082-146020158	Chr1:146019082-146020158	POLR3GL
Raver2|Chr4:101291835-101292334	Chr1:65000797-65001542	Chr1-65001064-65004400	Chr1:65001064-65004400	RAVER2
Ndc1|Chr4:107163980-107164479	Chr1:54069990-54070504	Chr1-54069658-54070672	Chr1:54069658-54070672	NDC1
Magoh|Chr4:107737821-107738320	Chr1:53393298-53393811	Chr1-53393060-53394083	Chr1:53393060-53394083	MAGOH
Spata6|Chr4:111687571-111688070	Chr1:48498034-48498436	Chr1-48490097-48499301	Chr1:48490097-48499301	SPATA6
Lurap1|Chr4:116144116-116144615	Chr1:46203304-46203837	Chr1-46201466-46207831	Chr1:46201466-46207831	LURAP1
5730409E04Rik|Chr4:126839782-126840281	Chr1:35451000-35451591	Chr1-35447219-35452703	Chr1:35447219-35452703	C1orf216
Marcksl1|Chr4:129455041-129455540	Chr1:32401009-32401403	Chr1-32399778-32401626	Chr1:32399778-32401626	MARCKSL1
Zbtb8os|Chr4:129577035-129577534	Chr1:32248133-32248657	Chr1-32246866-32248799	Chr1:32246866-32248799	ZBTB8OS
Wasf2|Chr4:133467976-133468475	Chr1:27031474-27032086	Chr1-27031077-27032265	Chr1:27031077-27032265	WASF2
Cep85|Chr4:134035974-134036473	Chr1:26391355-26391875	Chr1-26390718-26392193	Chr1:26390718-26392193	CEP85
Rps6ka1|Chr4:134035974-134036473	Chr1:26391355-26391875	Chr1-26390718-26392193	Chr1:26390718-26392193	RPS6KA1
Dhdds|Chr4:134444840-134445339	Chr1:25933972-25934434	Chr1-25932882-25934525	Chr1:25932882-25934525	DHDDS
Man1c1|Chr4:134444840-134445339	Chr1:25933972-25934434	Chr1-25932882-25934525	Chr1:25932882-25934525	MAN1C1
Hmgcl|Chr4:135667383-135667882	Chr1:24199231-24199722	Chr1-24198879-24200198	Chr1:24198879-24200198	HMGCL
Hmgcl|Chr4:136071293-136071792	Chr1:23635088-23635420	Chr1-23633854-23635972	Chr1:23633854-23635972	HMGCL
Iffo2|Chr4:139251903-139252402	Chr1:19391326-19391658	Chr1-19389875-19394130	Chr1:19389875-19394130	IFFO2
Fbxo44|Chr4:147960076-147960575	Chr1:11892495-11894395	Chr1-11893280-11894397	Chr1:11893280-11894397	FBXO44
Mad2l2|Chr4:147960076-147960575	Chr1:11892495-11894395	Chr1-11893280-11894397	Chr1:11893280-11894397	MAD2L2
Mthfr|Chr4:148008325-148008824	Chr1:11838519-11839066	Chr1-11836834-11839616	Chr1:11836834-11839616	MTHFR
Plod1|Chr4:148008325-148008824	Chr1:11838519-11839066	Chr1-11836834-11839616	Chr1:11836834-11839616	PLOD1
Fbxo6|Chr4:148327145-148327644	Chr1:11439077-11439521	Chr1-11438977-11442630	Chr1:11438977-11442630	FBXO6
Mad2l2|Chr4:148327145-148327644	Chr1:11439077-11439521	Chr1-11438977-11442630	Chr1:11438977-11442630	MAD2L2
Fbxo2|Chr4:148417198-148417697	Chr1:11312088-11312596	Chr1-11311329-11317613	Chr1:11311329-11317613	FBXO2
Park7|Chr4:151139363-151139862	Chr1:7669451-7669915	Chr1-7666156-7673789	Chr1:7666156-7673789	PARK7
Pex10|Chr4:154825708-154826207	Chr1:2822143-2822447	Chr1-2821134-2822682	Chr1:2821134-2822682	PEX10
Ssu72|Chr4:155563827-155564326	Chr1:1777938-1778456	Chr1-1775619-1785252	Chr1:1775619-1785252	SSU72
Gne|Chr4:44168057-44168556	Chr9:36401016-36401459	Chr9-36398017-36403281	Chr9:36398017-36403281	GNE
Shb|Chr4:45320140-45320639	Chr9:37784549-37785105	Chr9-37784313-37785882	Chr9:37784313-37785882	SHB
Shb|Chr4:45418216-45418715	Chr9:37913485-37913955	Chr9-37912810-37919094	Chr9:37912810-37919094	SHB
Slc25a51|Chr4:45418216-45418715	Chr9:37913485-37913955	Chr9-37912810-37919094	Chr9:37912810-37919094	SLC25A51
Trmt10b|Chr4:45418216-45418715	Chr9:37913485-37913955	Chr9-37912810-37919094	Chr9:37912810-37919094	TRMT10B
Trmt10b|Chr4:45513832-45514331	Chr9:38047602-38048146	Chr9-38046840-38048985	Chr9:38046840-38048985	TRMT10B
Inip|Chr4:59783620-59784119	Chr9:112717825-112718399	Chr9-112716674-112720681	Chr9:112716674-112720681	INIP
Alad|Chr4:62763922-62764421	Chr9:113657985-113658352	Chr9-113654332-113658731	Chr9:113654332-113658731	ALAD
Ubxn2b|Chr4:6427327-6427826	Chr8:58608405-58608974	Chr8-58608283-58609511	Chr8:58608283-58609511	UBXN2B
Mtap|Chr4:89145267-89145766	Chr9:21812694-21813344	Chr9-21810624-21814688	Chr9:21810624-21814688	MTAP
Tpst2|Chr5:112237145-112237644	Chr22:26648164-26648770	Chr22-26647654-26649751	Chr22:26647654-26649751	TPST2
Tpst2|Chr5:112371792-112372291	Chr22:26462820-26463200	Chr22-26462872-26463956	Chr22:26462872-26463956	TPST2
Sart3|Chr5:113872807-113873306	Chr12:108691353-108691955	Chr12-108684795-108694431	Chr12:108684795-108694431	SART3
Fam222a|Chr5:114639233-114639732	Chr12:109805142-109805654	Chr12-109804707-109806224	Chr12:109804707-109806224	FAM222A
Srsf9|Chr5:115319531-115320030	Chr12:120474676-120474985	Chr12-120473480-120478071	Chr12:120473480-120478071	SRSF9
Unc119b|Chr5:115319531-115320030	Chr12:120474676-120474985	Chr12-120473480-120478071	Chr12:120473480-120478071	UNC119B
Unc119b|Chr5:115441368-115441867	Chr12:120356400-120356978	Chr12-120356266-120357322	Chr12:120356266-120357322	UNC119B
Anapc7|Chr5:122627151-122627650	Chr12:110100361-110100647	Chr12-110099336-110104905	Chr12:110099336-110104905	ANAPC7
Bcl7a|Chr5:123377469-123377968	Chr12:122063937-122064521	Chr12-122061282-122065701	Chr12:122061282-122065701	BCL7A
Cdk2ap1|Chr5:124186351-124186850	Chr12:123077081-123077698	Chr12-123074852-123079476	Chr12:123074852-123079476	CDK2AP1
Abhd11|Chr5:135106613-135107112	Chr7:73624302-73624711	Chr7-73623193-73624868	Chr7:73623193-73624868	ABHD11
Dtx2|Chr5:135867328-135867827	Chr7:76280204-76280653	Chr7-76280437-76283790	Chr7:76280437-76283790	DTX2
Col26a1|Chr5:136706728-136707227	Chr7:101602403-101602891	Chr7-101602179-101603101	Chr7:101602179-101603101	COL26A1
Gnb2|Chr5:137032625-137033124	Chr7:101162743-101163209	Chr7-101162568-101166637	Chr7:101162568-101166637	GNB2
Ppp1r35|Chr5:137338157-137338656	Chr7:100837312-100837592	Chr7-100835595-100838999	Chr7:100835595-100838999	PPP1R35
Slc12a9|Chr5:137338157-137338656	Chr7:100837312-100837592	Chr7-100835595-100838999	Chr7:100835595-100838999	SLC12A9
Srrt|Chr5:137671692-137672191	Chr7:100545766-100546281	Chr7-100542724-100548787	Chr7:100542724-100548787	SRRT
Ints1|Chr5:140034936-140035435	Chr7:1856906-1857420	Chr7-1856327-1859209	Chr7:1856327-1859209	INTS1
Psmg3|Chr5:140034936-140035435	Chr7:1856906-1857420	Chr7-1856327-1859209	Chr7:1856327-1859209	PSMG3
Snx8|Chr5:140034936-140035435	Chr7:1856906-1857420	Chr7-1856327-1859209	Chr7:1856327-1859209	SNX8
Brat1|Chr5:140748939-140749438	Chr7:2709428-2709821	Chr7-2705377-2711389	Chr7:2705377-2711389	BRAT1
Zfp316|Chr5:143711239-143711738	Chr7:6160349-6160658	Chr7-6157773-6160824	Chr7:6157773-6160824	ZNF316
Abcf2|Chr5:24529967-24530466	Chr7:151172512-151172977	Chr7-151171623-151175816	Chr7:151171623-151175816	ABCF2
Slc5a6|Chr5:30806067-30806566	Chr2:26961607-26962495	Chr2-26961114-26962518	Chr2:26961114-26962518	SLC5A6
Smim20|Chr5:53123488-53123987	Chr4:25767842-25768358	Chr4-25767670-25768510	Chr4:25767670-25768510	SMIM20
Tbc1d1|Chr5:64289167-64289666	Chr4:38062038-38062445	Chr4-38061793-38063494	Chr4:38061793-38063494	TBC1D1
Klf3|Chr5:64505172-64505671	Chr4:38318782-38319273	Chr4-38312766-38321295	Chr4:38312766-38321295	KLF3
Noa1|Chr5:77354398-77354897	Chr4:57037899-57038434	Chr4-57037557-57038771	Chr4:57037557-57038771	NOA1
Noa1|Chr5:77460283-77460782	Chr4:57164008-57164364	Chr4-57162981-57165578	Chr4:57162981-57165578	NOA1
Mtmr14|Chr6:112896180-112896679	Chr3:9198899-9199303	Chr3-9197447-9206919	Chr3:9197447-9206919	MTMR14
Thumpd3|Chr6:112896180-112896679	Chr3:9198899-9199303	Chr3-9197447-9206919	Chr3:9197447-9206919	THUMPD3
Mtmr14|Chr6:112972710-112973209	Chr3:9279463-9280290	Chr3-9279533-9281338	Chr3:9279533-9281338	MTMR14
Brpf1|Chr6:113037936-113038435	Chr3:9353056-9353559	Chr3-9352889-9353795	Chr3:9352889-9353795	BRPF1
Brpf1|Chr6:113075901-113076400	Chr3:9396129-9396650	Chr3-9395355-9401176	Chr3:9395355-9401176	BRPF1
Thumpd3|Chr6:113392197-113392696	Chr3:9809658-9810206	Chr3-9808074-9811616	Chr3:9808074-9811616	THUMPD3
Vhl|Chr6:113469374-113469873	Chr3:9915049-9915570	Chr3-9914361-9918546	Chr3:9914361-9918546	VHL
Cacna1c|Chr6:119464886-119465385	Chr12:1608477-1608930	Chr12-1603759-1613274	Chr12:1603759-1613274	CACNA1C
Wnt5b|Chr6:119464886-119465385	Chr12:1608477-1608930	Chr12-1603759-1613274	Chr12:1603759-1613274	WNT5B
Bid|Chr6:121110170-121110669	Chr22:18001523-18001937	Chr22-17998689-18008085	Chr22:17998689-18008085	BID
Prmt8|Chr6:127970058-127970557	Chr12:3275387-3275950	Chr12-3275053-3276424	Chr12:3275053-3276424	PRMT8
Dusp16|Chr6:134863092-134863591	Chr12:12655817-12656121	Chr12-12654715-12656887	Chr12:12654715-12656887	DUSP16
Gpr19|Chr6:134887665-134888164	Chr12:12684386-12684890	Chr12-12683138-12686047	Chr12:12683138-12686047	GPR19
Cdkn1b|Chr6:134983428-134983927	Chr12:12786838-12787254	Chr12-12784866-12789562	Chr12:12784866-12789562	CDKN1B
Dusp16|Chr6:135087688-135088187	Chr12:12916164-12916735	Chr12-12915582-12923211	Chr12:12915582-12923211	DUSP16
Fam234b|Chr6:135417391-135417890	Chr12:13255679-13256205	Chr12-13253948-13257769	Chr12:13253948-13257769	FAM234B
Bhlhe41|Chr6:145998686-145999185	Chr12:26274636-26275181	Chr12-26270882-26280249	Chr12:26270882-26280249	BHLHE41
Slc35b4|Chr6:34040812-34041311	Chr7:134141220-134141706	Chr7-134140790-134142024	Chr7:134140790-134142024	SLC35B4
Agbl3|Chr6:34708877-34709376	Chr7:134890843-134891344	Chr7-134885966-134894719	Chr7:134885966-134894719	AGBL3
Agbl3|Chr6:34754396-34754895	Chr7:134943710-134944224	Chr7-134943570-134944343	Chr7:134943570-134944343	AGBL3
Gng12|Chr6:67102452-67102951	Chr1:67618613-67619140	Chr1-67617912-67619224	Chr1:67617912-67619224	GNG12
Mthfd2|Chr6:82996609-82997108	Chr2:74587546-74587874	Chr2-74587257-74588283	Chr2:74587257-74588283	MTHFD2
Rtkn|Chr6:83038532-83039031	Chr2:74548870-74549445	Chr2-74548470-74549888	Chr2:74548470-74549888	RTKN
Mob1a|Chr6:83179295-83179794	Chr2:74380116-74380663	Chr2-74377682-74382284	Chr2:74377682-74382284	MOB1A
Mthfd2|Chr6:83179295-83179794	Chr2:74380116-74380663	Chr2-74377682-74382284	Chr2:74377682-74382284	MTHFD2
Glcci1|Chr6:8777235-8777734	Chr7:8261176-8261730	Chr7-8261020-8262796	Chr7:8261020-8262796	GLCCI1
Zxdc|Chr6:90435090-90435589	Chr3:126389200-126389581	Chr3-126387640-126390928	Chr3:126387640-126390928	ZXDC
Atg16l2|Chr7:101412743-101413242	Chr11:72683736-72684209	Chr11-72679155-72687843	Chr11:72679155-72687843	ATG16L2
Rhog|Chr7:102417326-102417825	Chr11:4072514-4073052	Chr11-4071907-4073384	Chr11:4071907-4073384	RHOG
Rhog|Chr7:102506745-102507244	Chr11:4181957-4182510	Chr11-4182013-4182527	Chr11:4182013-4182527	RHOG
Fam160a2|Chr7:105685487-105685986	Chr11:6538079-6538657	Chr11-6538347-6542721	Chr11:6538347-6542721	FAM160A2
Parva|Chr7:112336158-112336657	Chr11:12243263-12243772	Chr11-12243532-12250267	Chr11:12243532-12250267	PARVA
Sox6|Chr7:116237006-116237505	Chr11:16924992-16925582	Chr11-16924685-16926324	Chr11:16924685-16926324	SOX6
Cd2bp2|Chr7:126754801-126755300	Chr16:30124368-30124722	Chr16-30120207-30124898	Chr16:30120207-30124898	CD2BP2
Trim28|Chr7:12780419-12780918	Chr19:58098033-58098524	Chr19-58096185-58099160	Chr19:58096185-58099160	TRIM28
Htra1|Chr7:130645686-130646185	Chr10:122112406-122112970	Chr10-122112410-122114321	Chr10:122112410-122114321	HTRA1
Htra1|Chr7:130720571-130721070	Chr10:122198480-122199118	Chr10-122197657-122199828	Chr10:122197657-122199828	HTRA1
Bccip|Chr7:133856219-133856718	Chr10:125982217-125982724	Chr10-125982177-125982945	Chr10:125982177-125982945	BCCIP
Dhx32|Chr7:133856219-133856718	Chr10:125982217-125982724	Chr10-125982177-125982945	Chr10:125982177-125982945	DHX32
Zfp511|Chr7:139615692-139616191	Chr10:132836262-132836832	Chr10-132834402-132838291	Chr10:132834402-132838291	ZNF511
Dact3|Chr7:16463150-16463649	Chr19:47035834-47036172	Chr19-47034954-47039940	Chr19:47034954-47039940	DACT3
Fkrp|Chr7:16463150-16463649	Chr19:47035834-47036172	Chr19-47034954-47039940	Chr19:47034954-47039940	FKRP
Mark4|Chr7:19257232-19257731	Chr19:45526162-45526674	Chr19-45522181-45530040	Chr19:45522181-45530040	MARK4
Rtn2|Chr7:19257232-19257731	Chr19:45526162-45526674	Chr19-45522181-45530040	Chr19:45522181-45530040	RTN2
Ercc1|Chr7:19308435-19308934	Chr19:45469094-45469620	Chr19-45466419-45471666	Chr19:45466419-45471666	ERCC1
2310022A10Rik|Chr7:27542563-27543062	Chr19:40365583-40366082	Chr19-40365136-40367751	Chr19:40365136-40367751	C19orf47
Paf1|Chr7:28294407-28294906	Chr19:39507055-39507554	Chr19-39506856-39507833	Chr19:39506856-39507833	PAF1
Samd4b|Chr7:28294407-28294906	Chr19:39507055-39507554	Chr19-39506856-39507833	Chr19:39506856-39507833	SAMD4B
Hnrnpl|Chr7:28464359-28464858	Chr19:39310860-39311440	Chr19-39310501-39311452	Chr19:39310501-39311452	HNRNPL
Nfkbib|Chr7:28568179-28568678	Chr19:39169153-39169611	Chr19-39165929-39174586	Chr19:39165929-39174586	NFKBIB
Psmd8|Chr7:29039509-29040008	Chr19:38544280-38544873	Chr19-38543068-38545512	Chr19:38543068-38545512	PSMD8
Polr2i|Chr7:30347726-30348225	Chr19:35958964-35959657	Chr19-35958737-35959884	Chr19:35958737-35959884	POLR2I
Arhgap33|Chr7:30373432-30373931	Chr19:35931535-35932026	Chr19-35930372-35933410	Chr19:35930372-35933410	ARHGAP33
Usf2|Chr7:31150870-31151369	Chr19:35000157-35000531	Chr19-34996963-35003908	Chr19:34996963-35003908	USF2
Myadm|Chr7:3411215-3411714	Chr19:53978186-53978781	Chr19-53976854-53983124	Chr19:53976854-53983124	MYADM
Myadm|Chr7:3415269-3415768	Chr19:53982507-53982994	Chr19-53976854-53983124	Chr19:53976854-53983124	MYADM
Chst8|Chr7:34569928-34570427	Chr19:33906722-33907293	Chr19-33904660-33907333	Chr19:33904660-33907333	CHST8
Pepd|Chr7:35025879-35026378	Chr19:33406825-33407282	Chr19-33401950-33409403	Chr19:33401950-33409403	PEPD
Ccne1|Chr7:38073788-38074287	Chr19:29857993-29858449	Chr19-29857966-29858425	Chr19:29857966-29858425	CCNE1
1600014C10Rik|Chr7:38200869-38201368	Chr19:29694536-29694923	Chr19-29692509-29696506	Chr19:29692509-29696506	C19orf12
Dbp|Chr7:45538234-45538733	Chr19:48858733-48859102	Chr19-48858523-48860591	Chr19:48858523-48860591	DBP
Saal1|Chr7:46587268-46587767	Chr11:17954224-17954741	Chr11-17954465-17954981	Chr11:17954465-17954981	SAAL1
Abhd2|Chr7:79246247-79246746	Chr15:89057415-89057995	Chr15-89057086-89059419	Chr15:89057086-89059419	ABHD2
Blm|Chr7:80215304-80215803	Chr15:90219387-90219975	Chr15-90218898-90225917	Chr15:90218898-90225917	BLM
Ngrn|Chr7:80215304-80215803	Chr15:90219387-90219975	Chr15-90218898-90225917	Chr15:90218898-90225917	NGRN
Tppp3|Chr8:105217822-105218321	Chr16:67100886-67101221	Chr16-67100481-67102404	Chr16:67100481-67102404	TPPP3
Slc7a6os|Chr8:106403225-106403724	Chr16:68510132-68510963	Chr16-68509703-68510867	Chr16:68509703-68510867	SLC7A6OS
Zfp821|Chr8:109417152-109417651	Chr16:72241822-72242321	Chr16-72241600-72244028	Chr16:72241600-72244028	ZNF821
Zfp821|Chr8:109464577-109465076	Chr16:72197971-72198444	Chr16-72194798-72201042	Chr16:72194798-72201042	ZNF821
Dhx38|Chr8:109853351-109853850	Chr16:71746278-71746885	Chr16-71745871-71746880	Chr16:71745871-71746880	DHX38
Zdhhc7|Chr8:120216714-120217213	Chr16:85157242-85157832	Chr16-85157726-85159027	Chr16:85157726-85159027	ZDHHC7
Fbxo31|Chr8:121717797-121718296	Chr16:87588710-87589190	Chr16-87588488-87589828	Chr16:87588488-87589828	FBXO31
Nup133|Chr8:124052001-124052500	Chr1:229661081-229661697	Chr1-229660832-229667952	Chr1:229660832-229667952	NUP133
2810004N23Rik|Chr8:124826679-124827178	Chr1:231209426-231210439	Chr1-231209799-231210099	Chr1:231209799-231210099	C1orf131
Tarbp1|Chr8:126382575-126383074	Chr1:234309729-234310304	Chr1-234309204-234310531	Chr1:234309204-234310531	TARBP1
Trappc11|Chr8:47242497-47242996	Chr4:183959983-183960480	Chr4-183957924-183963860	Chr4:183957924-183963860	TRAPPC11
Wwc2|Chr8:47743330-47743829	Chr4:183405723-183407539	Chr4-183404670-183409971	Chr4:183404670-183409971	WWC2
Wwc2|Chr8:48109901-48110400	Chr4:182916984-182917564	Chr4-182916221-182918628	Chr4:182916221-182918628	WWC2
Armc6|Chr8:69920180-69920679	Chr19:19489175-19489745	Chr19-19485043-19495029	Chr19:19485043-19495029	ARMC6
Gatad2a|Chr8:69920180-69920679	Chr19:19489175-19489745	Chr19-19485043-19495029	Chr19:19485043-19495029	GATAD2A
Armc6|Chr8:70469178-70469677	Chr19:18644943-18645258	Chr19-18644088-18651536	Chr19:18644088-18651536	ARMC6
Mast3|Chr8:70769286-70769785	Chr19:18167110-18168610	Chr19-18166689-18175759	Chr19:18166689-18175759	MAST3
Pgls|Chr8:71521611-71522110	Chr19:17390962-17391373	Chr19-17390200-17392416	Chr19:17390200-17392416	PGLS
Dnajb1|Chr8:83783089-83783588	Chr19:14348605-14348908	Chr19-14347675-14349174	Chr19:14347675-14349174	DNAJB1
Prkaca|Chr8:83875277-83875776	Chr19:14248374-14249033	Chr19-14246343-14251418	Chr19:14246343-14251418	PRKACA
Dnajb1|Chr8:84025927-84026426	Chr19:14057133-14057790	Chr19-14056685-14058370	Chr19:14056685-14058370	DNAJB1
Nacc1|Chr8:84459212-84459711	Chr19:13459426-13459822	Chr19-13458380-13460443	Chr19:13458380-13460443	NACC1
Gcdh|Chr8:84815455-84815954	Chr19:12974372-12974702	Chr19-12973246-12975671	Chr19:12973246-12975671	GCDH
Farsa|Chr8:84997814-84998313	Chr19:12765901-12766460	Chr19-12765596-12767795	Chr19:12765596-12767795	FARSA
Anapc13|Chr9:102866832-102867331	Chr3:134213037-134213465	Chr3-134211780-134213736	Chr3:134211780-134213736	ANAPC13
Topbp1|Chr9:103092096-103092595	Chr3:133927234-133928095	Chr3-133926390-133928626	Chr3:133926390-133928626	TOPBP1
Srprb|Chr9:103465620-103466119	Chr3:133437682-133437999	Chr3-133437572-133438038	Chr3:133437572-133438038	SRPRB
Topbp1|Chr9:103494269-103494768	Chr3:133384413-133384950	Chr3-133383737-133385439	Chr3:133383737-133385439	TOPBP1
Twf2|Chr9:106306631-106307130	Chr3:52123271-52123618	Chr3-52115965-52124558	Chr3:52115965-52124558	TWF2
Tex264|Chr9:106675417-106675916	Chr3:51682012-51682570	Chr3-51681210-51682684	Chr3:51681210-51682684	TEX264
Hemk1|Chr9:107357559-107358058	Chr3:50550092-50550650	Chr3-50549531-50550790	Chr3:50549531-50550790	HEMK1
Nprl2|Chr9:107377826-107378325	Chr3:50530274-50530785	Chr3-50529984-50530806	Chr3:50529984-50530806	NPRL2
Tmem115|Chr9:107377826-107378325	Chr3:50530274-50530785	Chr3-50529984-50530806	Chr3:50529984-50530806	TMEM115
Tusc2|Chr9:107377826-107378325	Chr3:50530274-50530785	Chr3-50529984-50530806	Chr3:50529984-50530806	TUSC2
Arih2|Chr9:108452182-108452681	Chr3:49171325-49171813	Chr3-49170589-49174252	Chr3:49170589-49174252	ARIH2
Nckipsd|Chr9:108854340-108854839	Chr3:48634725-48635239	Chr3-48631796-48636822	Chr3:48631796-48636822	NCKIPSD
Igsf9b|Chr9:27413895-27414394	Chr11:133831175-133831520	Chr11-133831249-133831650	Chr11:133831249-133831650	IGSF9B
Foxred1|Chr9:35017419-35017918	Chr11:126443239-126443749	Chr11-126442653-126444111	Chr11:126442653-126444111	FOXRED1
St3gal4|Chr9:35017419-35017918	Chr11:126443239-126443749	Chr11-126442653-126444111	Chr11:126442653-126444111	ST3GAL4
Ccdc15|Chr9:37044347-37044846	Chr11:125272875-125273461	Chr11-125270312-125273352	Chr11:125270312-125273352	CCDC15
Siae|Chr9:37420687-37421186	Chr11:124876183-124876667	Chr11-124874642-124880659	Chr11:124874642-124880659	SIAE
Msantd2|Chr9:37430453-37430952	Chr11:124867655-124868132	Chr11-124865077-124869394	Chr11:124865077-124869394	MSANTD2
Tbrg1|Chr9:37430453-37430952	Chr11:124867655-124868132	Chr11-124865077-124869394	Chr11:124865077-124869394	TBRG1
Zfp202|Chr9:40241436-40241935	Chr11:123683555-123684050	Chr11-123682873-123683853	Chr11:123682873-123683853	ZNF202
Gramd1b|Chr9:40330514-40331013	Chr11:123580575-123581011	Chr11-123575942-123581044	Chr11:123575942-123581044	GRAMD1B
Scn3b|Chr9:40330514-40331013	Chr11:123580575-123581011	Chr11-123575942-123581044	Chr11:123575942-123581044	SCN3B
Scn3b|Chr9:40390826-40391325	Chr11:123511093-123511642	Chr11-123509060-123512338	Chr11:123509060-123512338	SCN3B
Phldb1|Chr9:45145395-45145894	Chr11:118146086-118146597	Chr11-118144352-118146988	Chr11:118144352-118146988	PHLDB1
Rbm7|Chr9:48646119-48646618	Chr11:114260974-114261903	Chr11-114256209-114261859	Chr11:114256209-114261859	RBM7
Scamp2|Chr9:57655669-57656168	Chr15:74771018-74771314	Chr15-74767914-74775943	Chr15:74767914-74775943	SCAMP2
Igdcc4|Chr9:65102424-65102923	Chr15:65421373-65421856	Chr15-65420255-65423738	Chr15:65420255-65423738	IGDCC4
Aph1b|Chr9:66611681-66612180	Chr15:63487225-63488099	Chr15-63487210-63488608	Chr15:63487210-63488608	APH1B
Rps27l|Chr9:66611681-66612180	Chr15:63487225-63488099	Chr15-63487210-63488608	Chr15:63487210-63488608	RPS27L
Gclc|Chr9:77806718-77807217	Chr6:53484539-53485056	Chr6-53481716-53488313	Chr6:53481716-53488313	GCLC
Gsta4|Chr9:78296046-78296545	Chr6:52839485-52840031	Chr6-52839212-52840016	Chr6:52839212-52840016	GSTA4
Zic1|Chr9:91355558-91356057	Chr3:147419110-147419599	Chr3-147418429-147424743	Chr3:147418429-147424743	ZIC1
Zic4|Chr9:91355558-91356057	Chr3:147419110-147419599	Chr3-147418429-147424743	Chr3:147418429-147424743	ZIC4
Pxylp1|Chr9:96860998-96861497	Chr3:141255421-141255925	Chr3-141255333-141256396	Chr3:141255333-141256396	PXYLP1
1810030O07Rik|ChrX:12252305-12252804	ChrX:40266887-40267555	ChrX-40266354-40267977	ChrX:40266354-40267977	CXorf38
Usp9x|ChrX:13346969-13347468	ChrX:41383344-41383830	ChrX-41382802-41384678	ChrX:41382802-41384678	USP9X
Nkrf|ChrX:36989295-36989794	ChrX:119693005-119693484	ChrX-119692112-119694400	ChrX:119692112-119694400	NKRF
Ube2a|ChrX:36989295-36989794	ChrX:119693005-119693484	ChrX-119692112-119694400	ChrX:119692112-119694400	UBE2A
Nkap|ChrX:36989962-36990461	ChrX:119693612-119694148	ChrX-119692112-119694400	ChrX:119692112-119694400	NKAP
Rab33a|ChrX:48343381-48343880	ChrX:129982261-129982753	ChrX-129978791-129985136	ChrX:129978791-129985136	RAB33A
Utp14a|ChrX:48343381-48343880	ChrX:129982261-129982753	ChrX-129978791-129985136	ChrX:129978791-129985136	UTP14A
Vma21|ChrX:71601080-71601579	ChrX:151082159-151082635	ChrX-151081760-151083131	ChrX:151081760-151083131	VMA21
Cetn2|ChrX:73007965-73008464	ChrX:152941431-152941871	ChrX-152939374-152942751	ChrX:152939374-152942751	CETN2
Ssr4|ChrX:74084847-74085346	ChrX:154096939-154097434	ChrX-154089549-154099091	ChrX:154089549-154099091	SSR4
Ccdc120|ChrX:7648606-7649105	ChrX:49191087-49191713	ChrX-49183847-49193766	ChrX:49183847-49193766	CCDC120
Timm17b|ChrX:7679656-7680155	ChrX:49163676-49164166	ChrX-49162385-49167810	ChrX:49162385-49167810	TIMM17B
Plagl1|Chr10:13090469-13090968	Chr6:144008125-144008659	Chr6-144007734-144008760	Chr6:144007734-144008760	PLAGL1
Nhsl1|Chr10:18526289-18526788	Chr6:138430640-138431154	Chr6-138428717-138432431	Chr6:138428717-138432431	NHSL1
Mfsd4b4|Chr10:39520238-39520737	Chr6:111709873-111710389	Chr6-111709161-111716413	Chr6:111709161-111716413	MFSD4B
Mfsd4b4|Chr10:39659286-39659785	Chr6:111552313-111552822	Chr6-111548917-111557371	Chr6:111548917-111557371	MFSD4B
Midn|Chr10:80357807-80358306	Chr19:1525077-1525659	Chr19-1521155-1525955	Chr19:1521155-1525955	MIDN
Sppl2b|Chr10:80939643-80940142	Chr19:2494762-2495089	Chr19-2490623-2497212	Chr19:2490623-2497212	SPPL2B
Glt8d2|Chr10:82909208-82909707	Chr12:104381939-104382310	Chr12-104381583-104382573	Chr12:104381583-104382573	GLT8D2
Rfx4|Chr10:84760036-84760535	Chr12:106587010-106587523	Chr12-106580494-106588548	Chr12:106580494-106588548	RFX4
Cry1|Chr10:84903700-84904199	Chr12:106759919-106760447	Chr12-106757439-106760673	Chr12:106757439-106760673	CRY1
Fbxo7|Chr10:86032376-86032875	Chr22:32486817-32487378	Chr22-32482698-32489522	Chr22:32482698-32489522	FBXO7
Actr6|Chr10:89461796-89462295	Chr12:100554503-100554989	Chr12-100553822-100555091	Chr12:100553822-100555091	ACTR6
Elk3|Chr10:93291260-93291759	Chr12:96216016-96216603	Chr12-96214724-96216124	Chr12:96214724-96216124	ELK3
Itga2b|Chr11:102245012-102245511	Chr17:44138059-44138561	Chr17-44137519-44139267	Chr17:44137519-44139267	ITGA2B
Mapt|Chr11:104289287-104289786	Chr17:45973625-45974220	Chr17-45973120-45981358	Chr17:45973120-45981358	MAPT
Cacng5|Chr11:107738347-107738846	Chr17:67022386-67022936	Chr17-67021040-67023417	Chr17:67021040-67023417	CACNG5
Cacng5|Chr11:107982445-107982944	Chr17:66737507-66738011	Chr17-66737136-66738167	Chr17:66737136-66738167	CACNG5
Cacng5|Chr11:108020698-108021197	Chr17:66680428-66680923	Chr17-66678641-66685085	Chr17:66678641-66685085	CACNG5
Axin2|Chr11:109244472-109244971	Chr17:65198722-65199170	Chr17-65198336-65199209	Chr17:65198336-65199209	AXIN2
Zranb3|Chr1:128471835-128472334	Chr2:136024857-136025397	Chr2-136019507-136026592	Chr2:136019507-136026592	ZRANB3
Zranb3|Chr1:128472361-128472860	Chr2:136025438-136025931	Chr2-136019507-136026592	Chr2:136019507-136026592	ZRANB3
Elk4|Chr1:132212050-132212549	Chr1:205430693-205431276	Chr1-205429458-205431414	Chr1:205429458-205431414	ELK4
Ppp1r15b|Chr1:133385429-133385928	Chr1:204123297-204123837	Chr1-204122838-204125096	Chr1:204122838-204125096	PPP1R15B
Cyb5r1|Chr1:134151505-134152004	Chr1:203216267-203216707	Chr1-203214568-203217327	Chr1:203214568-203217327	CYB5R1
Tbc1d10a|Chr11:3774770-3775269	Chr22:30802277-30802966	Chr22-30802157-30803938	Chr22:30802157-30803938	TBC1D10A
Cdkn2aipnl|Chr11:52346219-52346718	Chr5:134026566-134027017	Chr5-134026508-134026989	Chr5:134026508-134026989	CDKN2AIPNL
Slc22a21|Chr11:54112814-54113313	Chr5:132215333-132216310	Chr5-132214635-132216142	Chr5:132214635-132216142	SLC22A5
Tnip1|Chr11:55039560-55040059	Chr5:151164656-151165182	Chr5-151164571-151165250	Chr5:151164571-151165250	TNIP1
Rxrg|Chr1:167220465-167220964	Chr1:165914235-165914707	Chr1-165913735-165914820	Chr1:165913735-165914820	RXRG
Tmem107|Chr11:69072908-69073407	Chr17:8173605-8174110	Chr17-8170156-8177449	Chr17:8170156-8177449	TMEM107
Gps2|Chr11:69546285-69546784	Chr17:7717497-7718014	Chr17-7716252-7718475	Chr17:7716252-7718475	GPS2
Trp53|Chr11:69546285-69546784	Chr17:7717497-7718014	Chr17-7716252-7718475	Chr17:7716252-7718475	TP53
Phf23|Chr11:69604690-69605189	Chr17:7651701-7652184	Chr17-7649895-7658136	Chr17:7649895-7658136	PHF23
Gps2|Chr11:70213667-70214166	Chr17:7043871-7044310	Chr17-7041210-7044353	Chr17:7041210-7044353	GPS2
Camta2|Chr11:70681826-70682325	Chr17:4980663-4981057	Chr17-4979737-4982750	Chr17:4979737-4982750	CAMTA2
Tagln2|Chr1:172562583-172563082	Chr1:159854962-159855466	Chr1-159853273-159856831	Chr1:159853273-159856831	TAGLN2
Mettl16|Chr11:74734851-74735350	Chr17:2580545-2581058	Chr17-2578506-2582626	Chr17:2578506-2582626	METTL16
Mnt|Chr11:74734851-74735350	Chr17:2580545-2581058	Chr17-2578506-2582626	Chr17:2578506-2582626	MNT
Mnt|Chr11:74821436-74821935	Chr17:2415994-2416327	Chr17-2414715-2422235	Chr17:2414715-2422235	MNT
Tsr1|Chr11:74821436-74821935	Chr17:2415994-2416327	Chr17-2414715-2422235	Chr17:2414715-2422235	TSR1
Tsr1|Chr11:74981360-74981859	Chr17:2244711-2245201	Chr17-2244302-2245543	Chr17:2244302-2245543	TSR1
Zbtb18|Chr1:177150438-177150937	Chr1:243713564-243714073	Chr1-243710220-243717551	Chr1:243710220-243717551	ZBTB18
Zbtb18|Chr1:177702818-177703317	Chr1:244299355-244300685	Chr1-244295957-244300743	Chr1:244295957-244300743	ZBTB18
Cnih3|Chr1:181545299-181545798	Chr1:224853055-224853380	Chr1-224850938-224853390	Chr1:224850938-224853390	CNIH3
Vmp1|Chr11:86894088-86894587	Chr17:59440751-59441243	Chr17-59433961-59441599	Chr17:59433961-59441599	VMP1
Tns3|Chr11:8863761-8864260	Chr7:47827308-47827816	Chr7-47826866-47828697	Chr7:47826866-47828697	TNS3
Rsad1|Chr11:95006466-95006965	Chr17:50133654-50134151	Chr17-50127653-50136292	Chr17:50127653-50136292	RSAD1
Ppp1r9b|Chr11:95251253-95251752	Chr17:49861058-49861586	Chr17-49860138-49861676	Chr17:49860138-49861676	PPP1R9B
Rps6ka5|Chr12:100808741-100809240	Chr14:91146585-91147106	Chr14-91142669-91148328	Chr14:91142669-91148328	RPS6KA5
Ccnk|Chr12:108078088-108078587	Chr14:99357202-99357748	Chr14-99357264-99358368	Chr14:99357264-99358368	CCNK
Degs2|Chr12:108605516-108606015	Chr14:100019179-100019691	Chr14-100017708-100023358	Chr14:100017708-100023358	DEGS2
Akt1|Chr12:112473671-112474170	Chr14:104563902-104564449	Chr14-104562956-104564628	Chr14:104562956-104564628	AKT1
Akt1|Chr12:112743053-112743552	Chr14:104893076-104893672	Chr14-104891565-104894258	Chr14:104891565-104894258	AKT1
Adam17|Chr12:21542986-21543485	Chr2:9843157-9843712	Chr2-9842676-9844874	Chr2:9842676-9844874	ADAM17
Itgb1bp1|Chr12:21542986-21543485	Chr2:9843157-9843712	Chr2-9842676-9844874	Chr2:9842676-9844874	ITGB1BP1
Nova1|Chr12:47275773-47276272	Chr14:26966773-26967270	Chr14-26966722-26967547	Chr14:26966722-26967547	NOVA1
Angel1|Chr12:86614085-86614584	Chr14:76644823-76645318	Chr14-76644849-76645362	Chr14:76644849-76645362	ANGEL1
Irf2bpl|Chr12:86644895-86645394	Chr14:76713124-76713672	Chr14-76712778-76714278	Chr14:76712778-76714278	IRF2BPL
Vash1|Chr12:86795760-86796259	Chr14:76913518-76913930	Chr14-76912097-76914647	Chr14:76912097-76914647	VASH1
Sox4|Chr13:28553122-28553621	Chr6:22027164-22027590	Chr6-22027154-22027641	Chr6:22027154-22027641	SOX4
Sox4|Chr13:28958492-28958991	Chr6:21588250-21588874	Chr6-21586804-21590036	Chr6:21586804-21590036	SOX4
Lyrm4|Chr13:36019216-36019715	Chr6:5143550-5144099	Chr6-5142868-5145059	Chr6:5142868-5145059	LYRM4
Kdm1b|Chr13:46812617-46813116	Chr6:17830939-17831502	Chr6-17830366-17834108	Chr6:17830366-17834108	KDM1B
Kif13a|Chr13:46812617-46813116	Chr6:17830939-17831502	Chr6-17830366-17834108	Chr6:17830366-17834108	KIF13A
Thoc3|Chr13:54247493-54247992	Chr5:175729737-175730256	Chr5-175728996-175730412	Chr5:175728996-175730412	THOC3
Prelid1|Chr13:55421016-55421515	Chr5:177404241-177404800	Chr5-177402234-177406210	Chr5:177402234-177406210	PRELID1
Adarb2|Chr13:8272250-8272749	Chr10:1665134-1665605	Chr10-1661465-1671368	Chr10:1661465-1671368	ADARB2
Fam151b|Chr13:92751679-92752178	Chr5:80082715-80083205	Chr5-80081875-80087296	Chr5:80081875-80087296	FAM151B
Pde12|Chr14:26579291-26579790	Chr3:57692853-57693357	Chr3-57691252-57695032	Chr3:57691252-57695032	PDE12
Il17rd|Chr14:27366982-27367481	Chr3:56769380-56769988	Chr3-56768751-56770226	Chr3:56768751-56770226	IL17RD
Spcs1|Chr14:31188793-31189292	Chr3:52475304-52476447	Chr3-52475906-52476658	Chr3:52475906-52476658	SPCS1
Eaf1|Chr14:31428643-31429142	Chr3:15324439-15324958	Chr3-15318858-15326714	Chr3:15318858-15326714	EAF1
Lrp10|Chr14:54064464-54064963	Chr14:22391764-22392270	Chr14-22386734-22392646	Chr14:22386734-22392646	LRP10
1700123O20Rik|Chr14:54448911-54449410	Chr14:22852955-22853461	Chr14-22852627-22854033	Chr14:22852627-22854033	C14orf119
Bcl2l2|Chr14:54494141-54494640	Chr14:22900139-22900672	Chr14-22899329-22901092	Chr14:22899329-22901092	BCL2L2
Homez|Chr14:54494141-54494640	Chr14:22900139-22900672	Chr14-22899329-22901092	Chr14:22899329-22901092	HOMEZ
Slc22a17|Chr14:54653456-54653955	Chr14:23071349-23071869	Chr14-23067425-23072504	Chr14:23067425-23072504	SLC22A17
Ngdn|Chr14:54714018-54714517	Chr14:23120734-23121193	Chr14-23118367-23122432	Chr14:23118367-23122432	NGDN
Khnyn|Chr14:55458186-55458685	Chr14:23929756-23930173	Chr14-23929179-23931186	Chr14:23929179-23931186	KHNYN
Rnf31|Chr14:55743653-55744152	Chr14:24296733-24297291	Chr14-24296161-24300897	Chr14:24296161-24300897	RNF31
Atp8a2|Chr14:60177170-60177669	Chr13:25371874-25372462	Chr13-25371498-25373124	Chr13:25371498-25373124	ATP8A2
Ptk2b|Chr14:65871301-65871800	Chr8:27727396-27727723	Chr8-27725486-27730898	Chr8:27725486-27730898	PTK2B
Dazap2|Chr15:100838770-100839269	Chr12:51531867-51532286	Chr12-51531325-51532522	Chr12:51531325-51532522	DAZAP2
Aaas|Chr15:102693547-102694046	Chr12:53696177-53696681	Chr12-53693474-53698055	Chr12:53693474-53698055	AAAS
Scrib|Chr15:75727496-75727995	Chr8:143401243-143401575	Chr8-143400403-143401909	Chr8:143400403-143401909	SCRIB
Nol12|Chr15:78778345-78778844	Chr22:37492791-37493268	Chr22-37492481-37493410	Chr22:37492481-37493410	NOL12
Phf5a|Chr15:81989543-81990042	Chr22:41597067-41597653	Chr22-41595882-41599283	Chr22:41595882-41599283	PHF5A
Tekt5|Chr16:10676663-10677162	Chr16:11104884-11105442	Chr16-11104575-11105435	Chr16:11104575-11105435	TEKT5
Tmem41a|Chr16:22302541-22303040	Chr3:185977382-185977780	Chr3-185977219-185977880	Chr3:185977219-185977880	TMEM41A
Wdr53|Chr16:31918282-31918781	Chr3:196978550-196979158	Chr3-196978184-196979819	Chr3:196978184-196979819	WDR53
Osbpl11|Chr16:33560237-33560736	Chr3:125165073-125165660	Chr3-125163500-125165815	Chr3:125163500-125165815	OSBPL11
Igsf11|Chr16:39048842-39049341	Chr3:118884810-118885126	Chr3-118883587-118885729	Chr3:118883587-118885729	IGSF11
Gramd1c|Chr16:44242583-44243082	Chr3:113626604-113627093	Chr3-113625771-113627395	Chr3:113625771-113627395	GRAMD1C
Gabpa|Chr16:84874813-84875312	Chr21:25789986-25790506	Chr21-25789866-25791055	Chr21:25789866-25791055	GABPA
Hunk|Chr16:90379838-90380337	Chr21:31865825-31866522	Chr21-31865430-31867351	Chr21:31865430-31867351	HUNK
1600012H06Rik|Chr17:15207957-15208456	Chr6:170006930-170007474	Chr6-170006257-170008051	Chr6:170006257-170008051	C6orf120
Pknox1|Chr17:31541402-31541901	Chr21:42940026-42940493	Chr21-42938371-42943127	Chr21:42938371-42943127	PKNOX1
H2-DMa|Chr17:34261432-34261931	Chr6:32668297-32668784	Chr6-32667998-32669703	Chr6:32667998-32669703	HLA-DMA
Frs3|Chr17:47545725-47546224	Chr6:42007461-42007977	Chr6-42007171-42008497	Chr6:42007171-42008497	FRS3
Dnpep|Chr1:75289260-75289759	Chr2:219350798-219351282	Chr2-219350748-219351319	Chr2:219350748-219351319	DNPEP
Ankzf1|Chr1:75398605-75399104	Chr2:219459284-219459794	Chr2-219459192-219462535	Chr2:219459192-219462535	ANKZF1
Abcb6|Chr1:75487005-75487504	Chr2:219551898-219552404	Chr2-219549425-219554955	Chr2:219549425-219554955	ABCB6
Gmppa|Chr1:75487005-75487504	Chr2:219551898-219552404	Chr2-219549425-219554955	Chr2:219549425-219554955	GMPPA
Zfand2b|Chr1:75487005-75487504	Chr2:219551898-219552404	Chr2-219549425-219554955	Chr2:219549425-219554955	ZFAND2B
Myl12a|Chr17:70683728-70684227	Chr18:3703451-3704029	Chr18-3703404-3705375	Chr18:3703404-3705375	MYL12A
Lbh|Chr17:73296810-73297309	Chr2:30706868-30707430	Chr2-30706789-30707599	Chr2:30706789-30707599	LBH
Ehd3|Chr17:73743836-73744335	Chr2:31169931-31170505	Chr2-31169959-31170892	Chr2:31169959-31170892	EHD3
Ttc7|Chr17:87521645-87522144	Chr2:47264898-47265350	Chr2-47263142-47266742	Chr2:47263142-47266742	TTC7A
Fbxo11|Chr17:88494015-88494514	Chr2:48397794-48398284	Chr2-48393018-48401745	Chr2:48393018-48401745	FBXO11
Ankrd29|Chr18:11883301-11883800	Chr18:23189110-23189538	Chr18-23188477-23190712	Chr18:23188477-23190712	ANKRD29
Celf4|Chr18:25486798-25487297	Chr18:37253771-37254362	Chr18-37253012-37254897	Chr18:37253012-37254897	CELF4
Hars|Chr18:36492717-36493216	Chr5:140322873-140323372	Chr5-140320753-140325602	Chr5:140320753-140325602	HARS
Hbegf|Chr18:36492717-36493216	Chr5:140322873-140323372	Chr5-140320753-140325602	Chr5:140320753-140325602	HBEGF
Pcdhb20|Chr18:37877026-37877525	Chr5:141557628-141558032	Chr5-141555950-141562029	Chr5:141555950-141562029	PCDHB14
Adamts19|Chr18:59077989-59078488	Chr5:129767816-129768315	Chr5-129767573-129769203	Chr5:129767573-129769203	ADAMTS19
Tcof1|Chr18:60680768-60681267	Chr5:150561002-150561789	Chr5-150554487-150561705	Chr5:150554487-150561705	TCOF1
Tcof1|Chr18:60786969-60787468	Chr5:150436051-150436516	Chr5-150433226-150436854	Chr5:150433226-150436854	TCOF1
Pcyox1l|Chr18:61313861-61314360	Chr5:149828373-149828870	Chr5-149827821-149829044	Chr5:149827821-149829044	PCYOX1L
Pcyox1l|Chr18:61398331-61398830	Chr5:149731903-149732411	Chr5-149729767-149732991	Chr5:149729767-149732991	PCYOX1L
Me2|Chr18:73863295-73863794	Chr18:50819837-50820357	Chr18-50816790-50822195	Chr18:50816790-50822195	ME2
Mbd1|Chr18:74442064-74442563	Chr18:50194980-50195509	Chr18-50194318-50195496	Chr18:50194318-50195496	MBD1
Myo5b|Chr18:74442064-74442563	Chr18:50194980-50195509	Chr18-50194318-50195496	Chr18:50194318-50195496	MYO5B
Vps37c|Chr19:10486295-10486794	Chr11:61477636-61478314	Chr11-61477437-61478276	Chr11:61477437-61478276	VPS37C
Psat1|Chr19:15801233-15801732	Chr9:78439916-78440459	Chr9-78436902-78440800	Chr9:78436902-78440800	PSAT1
Fam189a2|Chr19:23972748-23973247	Chr9:69391971-69392462	Chr9-69391005-69394112	Chr9:69391005-69394112	FAM189A2
Ide|Chr19:37550661-37551160	Chr10:92848734-92849392	Chr10-92845889-92850113	Chr10:92845889-92850113	IDE
Ccnj|Chr19:41101282-41101781	Chr10:96390192-96390739	Chr10-96389782-96391367	Chr10:96389782-96391367	CCNJ
Morn4|Chr19:41763793-41764292	Chr10:97210518-97210875	Chr10-97210273-97210942	Chr10:97210273-97210942	MORN4
Golga7b|Chr19:42237460-42237959	Chr10:97821181-97821696	Chr10-97821569-97822675	Chr10:97821569-97822675	GOLGA7B
Morn4|Chr19:42237460-42237959	Chr10:97821181-97821696	Chr10-97821569-97822675	Chr10:97821569-97822675	MORN4
Bloc1s2|Chr19:44582536-44583035	Chr10:100561798-100562404	Chr10-100561561-100563433	Chr10:100561561-100563433	BLOC1S2
As3mt|Chr19:46587813-46588312	Chr10:102729209-102729811	Chr10-102726152-102730193	Chr10:102726152-102730193	AS3MT
Sfxn2|Chr19:46670601-46671100	Chr10:102834848-102835400	Chr10-102834696-102835707	Chr10:102834696-102835707	SFXN2
Mus81|Chr19:5529228-5529727	Chr11:65818105-65818434	Chr11-65816672-65819466	Chr11:65816672-65819466	MUS81
Pacs1|Chr19:5648688-5649187	Chr11:65652663-65653173	Chr11-65648575-65656796	Chr11:65648575-65656796	PACS1
Tm7sf2|Chr19:6304716-6305215	Chr11:64847185-64847555	Chr11-64841554-64850196	Chr11:64841554-64850196	TM7SF2
Vps51|Chr19:6304716-6305215	Chr11:64847185-64847555	Chr11-64841554-64850196	Chr11:64841554-64850196	VPS51
Il15ra|Chr2:11347790-11348289	Chr10:6382961-6383481	Chr10-6381285-6387222	Chr10:6381285-6387222	IL15RA
Mfap1a|Chr2:121588291-121588790	Chr15:43921197-43921788	Chr15-43918468-43923947	Chr15:43918468-43923947	MFAP1
Dtwd1|Chr2:126362954-126363453	Chr15:49902268-49902748	Chr15-49897888-49904607	Chr15:49897888-49904607	DTWD1
Rassf2|Chr2:131827977-131828476	Chr20:4613670-4614222	Chr20-4612404-4616681	Chr20:4612404-4616681	RASSF2
Rassf2|Chr2:131828477-131828976	Chr20:4614223-4614723	Chr20-4612404-4616681	Chr20:4612404-4616681	RASSF2
Rbl1|Chr2:156996466-156996965	Chr20:36754413-36755020	Chr20-36754362-36755369	Chr20:36754362-36755369	RBL1
L3mbtl1|Chr2:162991318-162991817	Chr20:43564940-43565436	Chr20-43563081-43567515	Chr20:43563081-43567515	L3MBTL1
Zfp334|Chr2:165487062-165487561	Chr20:46681167-46681586	Chr20-46680369-46685860	Chr20:46680369-46685860	ZNF334
Cebpb|Chr2:167860431-167860930	Chr20:50415463-50416057	Chr20-50414756-50417515	Chr20:50414756-50417515	CEBPB
Spata2|Chr2:167860431-167860930	Chr20:50415463-50416057	Chr20-50414756-50417515	Chr20:50414756-50417515	SPATA2
Ogfr|Chr2:180472986-180473485	Chr20:62668357-62668897	Chr20-62663472-62671631	Chr20:62663472-62671631	OGFR
Col20a1|Chr2:180892761-180893260	Chr20:63177230-63177729	Chr20-63174700-63180113	Chr20:63174700-63180113	COL20A1
Arfrp1|Chr2:180996357-180996856	Chr20:63309335-63309920	Chr20-63306520-63310914	Chr20:63306520-63310914	ARFRP1
Bmi1|Chr2:18587400-18587899	Chr10:22229862-22230422	Chr10-22228091-22231239	Chr10:22228091-22231239	BMI1
Ddx31|Chr2:28755376-28755875	Chr9:132800092-132800491	Chr9-132799542-132800744	Chr9:132799542-132800744	DDX31
Itga6|Chr2:71786645-71787144	Chr2:172427179-172427794	Chr2-172426705-172430169	Chr2:172426705-172430169	ITGA6
Itga6|Chr2:72038106-72038605	Chr2:172806299-172806849	Chr2-172806153-172807917	Chr2:172806153-172807917	ITGA6
Mov10|Chr3:104541304-104541803	Chr1:113042526-113043068	Chr1-113040186-113044316	Chr1:113040186-113044316	MOV10
Csf1|Chr3:107612861-107613360	Chr1:110053770-110054275	Chr1-110052751-110054400	Chr1:110052751-110054400	CSF1
Cnn3|Chr3:121736364-121736863	Chr1:94527501-94527908	Chr1-94527181-94528840	Chr1:94527181-94528840	CNN3
Bcar3|Chr3:122104398-122104897	Chr1:94061368-94061870	Chr1-94061196-94062249	Chr1:94061196-94062249	BCAR3
Bcar3|Chr3:122121908-122122407	Chr1:94045718-94046814	Chr1-94044118-94046270	Chr1:94044118-94046270	BCAR3
Bcar3|Chr3:122311990-122312489	Chr1:93813929-93814498	Chr1-93813878-93815813	Chr1:93813878-93815813	BCAR3
Bcar3|Chr3:122419794-122420293	Chr1:93681467-93682034	Chr1-93679260-93682532	Chr1:93679260-93682532	BCAR3
Gng5|Chr3:146177612-146178111	Chr1:84944840-84945459	Chr1-84944385-84946063	Chr1:84944385-84946063	GNG5
Eif5a2|Chr3:28558437-28558936	Chr3:171173675-171174153	Chr3-171171322-171177420	Chr3:171171322-171177420	EIF5A2
Hapln2|Chr3:87816509-87817008	Chr1:156838863-156839576	Chr1-156838723-156839963	Chr1:156838723-156839963	HAPLN2
Tsacc|Chr3:88071708-88072207	Chr1:156584020-156584490	Chr1-156581967-156585168	Chr1:156581967-156585168	TSACC
Tsacc|Chr3:88192123-88192622	Chr1:156444372-156444669	Chr1-156442478-156446951	Chr1:156442478-156446951	TSACC
Shc1|Chr3:89266277-89266776	Chr1:155140197-155140852	Chr1-155139274-155141322	Chr1:155139274-155141322	SHC1
Shc1|Chr3:89546911-89547410	Chr1:154840471-154841080	Chr1-154840652-154841217	Chr1:154840652-154841217	SHC1
Dennd4b|Chr3:90220481-90220980	Chr1:153986154-153986787	Chr1-153984123-153991802	Chr1:153984123-153991802	DENND4B
Rab13|Chr3:90220481-90220980	Chr1:153986154-153986787	Chr1-153984123-153991802	Chr1:153984123-153991802	RAB13
Lepr|Chr4:101291835-101292334	Chr1:65000797-65001542	Chr1-65001064-65004400	Chr1:65001064-65004400	LEPR
Lrrc41|Chr4:115962503-115963002	Chr1:46466835-46467769	Chr1-46465130-46467669	Chr1:46465130-46467669	LRRC41
Ebna1bp2|Chr4:118566208-118566707	Chr1:43238010-43238539	Chr1-43234521-43242460	Chr1:43234521-43242460	EBNA1BP2
Txlna|Chr4:129771624-129772123	Chr1:31987176-31987639	Chr1-31986718-31988533	Chr1:31986718-31988533	TXLNA
Phactr4|Chr4:132292907-132293406	Chr1:28602805-28603290	Chr1-28601880-28603800	Chr1:28601880-28603800	PHACTR4
Cep85|Chr4:134251088-134251587	Chr1:26161869-26162388	Chr1-26160824-26163013	Chr1:26160824-26163013	CEP85
Pnrc2|Chr4:136223807-136224306	Chr1:23466488-23466869	Chr1-23465792-23468697	Chr1:23465792-23468697	PNRC2
Sdhb|Chr4:140648545-140649044	Chr1:17539380-17540055	Chr1-17535103-17543390	Chr1:17535103-17543390	SDHB
Zbtb17|Chr4:141506285-141506784	Chr1:15886186-15886917	Chr1-15882428-15889872	Chr1:15882428-15889872	ZBTB17
Dnajc16|Chr4:141857315-141857814	Chr1:15431089-15431427	Chr1-15430742-15431970	Chr1:15430742-15431970	DNAJC16
Ctnnbip1|Chr4:149247053-149247552	Chr1:10295452-10295943	Chr1-10291440-10300220	Chr1:10291440-10300220	CTNNBIP1
Rpl22|Chr4:152491172-152491671	Chr1:5975393-5975959	Chr1-5972878-5977847	Chr1:5972878-5977847	RPL22
Hes5|Chr4:154825708-154826207	Chr1:2822143-2822447	Chr1-2821134-2822682	Chr1:2821134-2822682	HES5
Tmem8b|Chr4:43630109-43630608	Chr9:35790221-35790738	Chr9-35790039-35794446	Chr9:35790039-35794446	TMEM8B
Anp32b|Chr4:46202079-46202578	Chr9:97710513-97711102	Chr9-97710308-97711403	Chr9:97710308-97711403	ANP32B
Anp32b|Chr4:46506694-46507193	Chr9:98087045-98087771	Chr9-98087334-98088223	Chr9:98087334-98088223	ANP32B
Col15a1|Chr4:46989844-46990343	Chr9:98707103-98707599	Chr9-98706650-98709863	Chr9:98706650-98709863	COL15A1
Chd7|Chr4:8799381-8799880	Chr8:60792742-60793242	Chr8-60789610-60794073	Chr8:60789610-60794073	CHD7
Chd7|Chr4:9016365-9016864	Chr8:61013438-61013941	Chr8-61008679-61018009	Chr8:61008679-61018009	CHD7
Pus1|Chr5:110788601-110789100	Chr12:131916919-131917577	Chr12-131917090-131922798	Chr12:131917090-131922798	PUS1
Fam222a|Chr5:114552729-114553228	Chr12:109701075-109701390	Chr12-109697159-109703044	Chr12:109697159-109703044	FAM222A
Gltp|Chr5:114552729-114553228	Chr12:109701075-109701390	Chr12-109697159-109703044	Chr12:109697159-109703044	GLTP
Msi1|Chr5:115125063-115125562	Chr12:120719833-120720367	Chr12-120719672-120722198	Chr12:120719672-120722198	MSI1
Msi1|Chr5:115318997-115319496	Chr12:120475015-120475348	Chr12-120473480-120478071	Chr12:120473480-120478071	MSI1
Tpcn1|Chr5:120302014-120302513	Chr12:113637996-113638605	Chr12-113637955-113638312	Chr12:113637955-113638312	TPCN1
Gpr12|Chr5:146315229-146315728	Chr13:26425458-26425961	Chr13-26423532-26426917	Chr13:26423532-26426917	GPR12
Ost4|Chr5:30806067-30806566	Chr2:26961607-26962495	Chr2-26961114-26962518	Chr2:26961114-26962518	OST4
Zfp513|Chr5:30927861-30928360	Chr2:27096062-27096633	Chr2-27094631-27097403	Chr2:27094631-27097403	ZNF513
Acox3|Chr5:35447794-35448293	Chr4:8747651-8748209	Chr4-8747323-8748144	Chr4:8747323-8748144	ACOX3
Gtpbp10|Chr5:5507803-5508302	Chr7:90412799-90413298	Chr7-90412696-90413271	Chr7:90412696-90413271	GTPBP10
Pdgfra|Chr5:75163283-75163782	Chr4:54260848-54261342	Chr4-54260330-54261537	Chr4:54260330-54261537	PDGFRA
Antxr2|Chr5:97935219-97935718	Chr4:79964530-79965150	Chr4-79964222-79965284	Chr4:79964222-79965284	ANTXR2
Ogg1|Chr6:113469374-113469873	Chr3:9915049-9915570	Chr3-9914361-9918546	Chr3:9914361-9918546	OGG1
Mbd4|Chr6:116072842-116073341	Chr3:129723757-129724299	Chr3-129723305-129724759	Chr3:129723305-129724759	MBD4
Zfp422|Chr6:116767604-116768103	Chr10:44864787-44865303	Chr10-44862392-44865815	Chr10:44862392-44865815	ZNF22
Ncapd2|Chr6:125418662-125419161	Chr12:6284998-6285546	Chr12-6284097-6285624	Chr12:6284097-6285624	NCAPD2
Parp11|Chr6:127529401-127529900	Chr12:3791413-3791943	Chr12-3791487-3791699	Chr12:3791487-3791699	PARP11
Fkbp14|Chr6:54809514-54810013	Chr7:30276148-30276581	Chr7-30275832-30276947	Chr7:30275832-30276947	FKBP14
Ggct|Chr6:55009574-55010073	Chr7:30520315-30520782	Chr7-30520576-30520884	Chr7:30520576-30520884	GGCT
Rpia|Chr6:70880842-70881341	Chr2:88591160-88591572	Chr2-88590942-88591606	Chr2:88590942-88591606	RPIA
Mxd1|Chr6:86921803-86922302	Chr2:69559810-69560213	Chr2-69559468-69560522	Chr2:69559468-69560522	MXD1
Abtb1|Chr6:88821786-88822285	Chr3:127696797-127697297	Chr3-127695775-127699988	Chr3:127695775-127699988	ABTB1
Txnrd3|Chr6:89553267-89553766	Chr3:126752116-126752655	Chr3-126751788-126752863	Chr3:126751788-126752863	TXNRD3
Adamts9|Chr6:92534651-92535150	Chr3:64267929-64268471	Chr3-64265491-64268650	Chr3:64265491-64268650	ADAMTS9
Zfp143|Chr7:109792689-109793188	Chr11:9015508-9016084	Chr11-9015527-9016354	Chr11:9015527-9016354	ZNF143
Eif3c|Chr7:126260723-126261222	Chr16:28277673-28278053	Chr16-28277279-28278572	Chr16:28277279-28278572	EIF3C
Asphd1|Chr7:126823074-126823573	Chr16:30031019-30031522	Chr16-30027411-30032680	Chr16:30027411-30032680	ASPHD1
Gdpd3|Chr7:126941665-126942164	Chr16:29911155-29911745	Chr16-29910639-29912734	Chr16:29910639-29912734	GDPD3
Nsmce4a|Chr7:130681821-130682320	Chr10:122154736-122155289	Chr10-122147303-122155985	Chr10:122147303-122155985	NSMCE4A
Dpysl4|Chr7:139339381-139339880	Chr10:132506728-132507158	Chr10-132506653-132511724	Chr10:132506653-132511724	DPYSL4
Ercc2|Chr7:19257232-19257731	Chr19:45526162-45526674	Chr19-45522181-45530040	Chr19:45522181-45530040	ERCC2
Xrcc1|Chr7:24564544-24565043	Chr19:43555110-43555737	Chr19-43554438-43555874	Chr19:43554438-43555874	XRCC1
Pou2f2|Chr7:25132997-25133496	Chr19:42132973-42133456	Chr19-42128836-42134022	Chr19:42128836-42134022	POU2F2
Prr12|Chr7:45361310-45361809	Chr19:49127868-49128241	Chr19-49126340-49130746	Chr19:49126340-49130746	PRR12
Abhd17c|Chr7:84272156-84272655	Chr15:80567845-80568401	Chr15-80567234-80568730	Chr15:80567234-80568730	ABHD17C
Bean1|Chr8:104540941-104541440	Chr16:66844555-66845073	Chr16-66844111-66845093	Chr16:66844111-66845093	BEAN1
Nutf2|Chr8:105515866-105516365	Chr16:67427965-67428581	Chr16-67427699-67434581	Chr16:67427699-67434581	NUTF2
Slc9a5|Chr8:105693559-105694058	Chr16:67652506-67653063	Chr16-67652112-67655055	Chr16:67652112-67655055	SLC9A5
Def8|Chr8:123137480-123137979	Chr16:89602534-89602805	Chr16-89601962-89602983	Chr16:89601962-89602983	DEF8
Ccsap|Chr8:124052001-124052500	Chr1:229661081-229661697	Chr1-229660832-229667952	Chr1:229660832-229667952	CCSAP
Fam149a|Chr8:45358256-45358755	Chr4:186144810-186145226	Chr4-186143835-186146571	Chr4:186143835-186146571	FAM149A
Fam149a|Chr8:45439143-45439642	Chr4:186038155-186038579	Chr4-186037745-186038834	Chr4:186037745-186038834	FAM149A
Pik3r2|Chr8:70684249-70684748	Chr19:18294501-18295042	Chr19-18286122-18295999	Chr19:18286122-18295999	PIK3R2
Mvb12a|Chr8:71602135-71602634	Chr19:17537412-17539420	Chr19-17538844-17540583	Chr19:17538844-17540583	MVB12A
Mvb12a|Chr8:71602718-71603217	Chr19:17539507-17540014	Chr19-17538844-17540583	Chr19:17538844-17540583	MVB12A
Prmt9|Chr8:77256483-77256982	Chr4:148064897-148065413	Chr4-148064235-148065456	Chr4:148064235-148065456	PRMT9
Junb|Chr8:84823561-84824060	Chr19:12965176-12965866	Chr19-12964060-12970462	Chr19:12964060-12970462	JUNB
Adgrg1|Chr8:95243029-95243528	Chr16:57890006-57890494	Chr16-57890381-57891057	Chr16:57890381-57891057	ADGRG1
Hemk1|Chr9:107463429-107463928	Chr3:50436135-50436572	Chr3-50435691-50437011	Chr3:50435691-50437011	HEMK1
Nprl2|Chr9:107463429-107463928	Chr3:50436135-50436572	Chr3-50435691-50437011	Chr3:50435691-50437011	NPRL2
Itga9|Chr9:118818524-118819023	Chr3:37703994-37704494	Chr3-37703776-37704498	Chr3:37703776-37704498	ITGA9
Vps26b|Chr9:26611807-26612306	Chr11:134530708-134531183	Chr11-134530705-134533519	Chr11:134530705-134533519	VPS26B
St3gal4|Chr9:34923139-34923638	Chr11:126544531-126545065	Chr11-126543263-126545576	Chr11:126543263-126545576	ST3GAL4
Foxred1|Chr9:34983413-34983912	Chr11:126480712-126481181	Chr11-126478960-126481797	Chr11:126478960-126481797	FOXRED1
Mcam|Chr9:44094072-44094571	Chr11:119356219-119356668	Chr11-119349732-119358735	Chr11:119349732-119358735	MCAM
Adpgk|Chr9:59282303-59282802	Chr15:72796616-72796993	Chr15-72796231-72797821	Chr15:72796231-72797821	ADPGK
Ankdd1a|Chr9:65133655-65134154	Chr15:65385480-65386043	Chr15-65383378-65387140	Chr15:65383378-65387140	ANKDD1A
Parp16|Chr9:65133655-65134154	Chr15:65385480-65386043	Chr15-65383378-65387140	Chr15:65383378-65387140	PARP16
Pdcd7|Chr9:65133655-65134154	Chr15:65385480-65386043	Chr15-65383378-65387140	Chr15:65383378-65387140	PDCD7
Aph1c|Chr9:66611681-66612180	Chr15:63487225-63488099	Chr15-63487210-63488608	Chr15:63487210-63488608	APH1B
Cgnl1|Chr9:71897319-71897818	Chr15:57217771-57218283	Chr15-57211722-57221645	Chr15:57211722-57221645	CGNL1
Rps4x|ChrX:101993661-101994160	ChrX:72060542-72060985	ChrX-72060212-72061523	ChrX:72060212-72061523	RPS4X
Tsr2|ChrX:151047340-151047839	ChrX:54495267-54495782	ChrX-54494818-54496848	ChrX:54494818-54496848	TSR2
Tsr2|ChrX:151168270-151168769	ChrX:54358758-54359244	ChrX-54356501-54359746	ChrX:54356501-54359746	TSR2
Zdhhc9|ChrX:48532166-48532665	ChrX:130192194-130192718	ChrX-130191991-130192880	ChrX:130191991-130192880	ZDHHC9
Emd|ChrX:73914835-73915334	ChrX:153928126-153928437	ChrX-153925517-153930719	ChrX:153925517-153930719	EMD
Gpkow|ChrX:7674208-7674707	ChrX:49166574-49167084	ChrX-49162385-49167810	ChrX:49162385-49167810	GPKOW
Hdac6|ChrX:7674208-7674707	ChrX:49166574-49167084	ChrX-49162385-49167810	ChrX:49162385-49167810	HDAC6
Hdac6|ChrX:7679656-7680155	ChrX:49163676-49164166	ChrX-49162385-49167810	ChrX:49162385-49167810	HDAC6
Ophn1|ChrX:99199128-99199627	ChrX:68894859-68895352	ChrX-68893154-68896062	ChrX:68893154-68896062	OPHN1
Bbs10|Chr10:111072955-111073454	Chr12:76666803-76667317	Chr12-76666127-76666828	Chr12:76666127-76666828	BBS10
Yeats4|Chr10:116996142-116996641	Chr12:69689046-69689423	Chr12-69688590-69690084	Chr12:69688590-69690084	YEATS4
Cpm|Chr10:117515699-117516198	Chr12:69070461-69070833	Chr12-69068843-69071153	Chr12:69068843-69071153	CPM
Pan2|Chr10:128176313-128176812	Chr12:56521641-56522125	Chr12-56520353-56523715	Chr12:56520353-56523715	PAN2
Nhsl1|Chr10:18474933-18475432	Chr6:138493524-138494061	Chr6-138493394-138494068	Chr6:138493394-138494068	NHSL1
Fam229b|Chr10:39421198-39421697	Chr6:111818397-111818767	Chr6-111816669-111820315	Chr6:111816669-111820315	FAM229B
Tube1|Chr10:39421198-39421697	Chr6:111818397-111818767	Chr6-111816669-111820315	Chr6:111816669-111820315	TUBE1
Zbtb2|Chr10:4334210-4334709	Chr6:151325250-151325885	Chr6-151323804-151326367	Chr6:151323804-151326367	ZBTB2
Pcbd1|Chr10:61068380-61068879	Chr10:70907827-70908352	Chr10-70907324-70907983	Chr10:70907324-70907983	PCBD1
Tspan15|Chr10:62261012-62261511	Chr10:69407252-69409258	Chr10-69406133-69411010	Chr10:69406133-69411010	TSPAN15
Rhobtb1|Chr10:69321167-69321666	Chr10:60816499-60816990	Chr10-60816127-60818948	Chr10:60816127-60818948	RHOBTB1
Slc16a9|Chr10:69870251-69870750	Chr10:60208458-60209143	Chr10-60208084-60211394	Chr10:60208084-60211394	SLC16A9
Slc16a9|Chr10:70119659-70120158	Chr10:59885708-59886316	Chr10-59885361-59886096	Chr10:59885361-59886096	SLC16A9
Slc16a9|Chr10:70296496-70296995	Chr10:59626201-59626758	Chr10-59625603-59626905	Chr10:59625603-59626905	SLC16A9
Thop1|Chr10:81021610-81022109	Chr19:2717053-2717500	Chr19-2717181-2724836	Chr19:2717181-2724836	THOP1
Dram1|Chr10:88356860-88357359	Chr12:101877282-101877851	Chr12-101875865-101878873	Chr12:101875865-101878873	DRAM1
Ust|Chr10:8960929-8961428	Chr6:148251266-148252129	Chr6-148249326-148251940	Chr6:148249326-148251940	UST
Rab5c|Chr11:100761667-100762166	Chr17:42184024-42184529	Chr17-42182733-42186612	Chr17:42182733-42186612	RAB5C
Rgs9|Chr11:109258944-109259443	Chr17:65179258-65179771	Chr17-65178937-65180397	Chr17:65178937-65180397	RGS9
Nup85|Chr11:115202278-115202777	Chr17:74791118-74792533	Chr17-74787843-74797161	Chr17:74787843-74797161	NUP85
Gga3|Chr11:115722511-115723010	Chr17:75426363-75426727	Chr17-75425398-75427250	Chr17:75425398-75427250	GGA3
Ubald2|Chr11:116505673-116506172	Chr17:76361587-76362029	Chr17-76359626-76363515	Chr17:76359626-76363515	UBALD2
Tmem163|Chr1:127380598-127381097	Chr2:134334545-134334846	Chr2-134333309-134339054	Chr2:134333309-134339054	TMEM163
4930505A04Rik|Chr11:30283643-30284142	Chr2:54438227-54438737	Chr2-54438115-54441352	Chr2:54438115-54441352	C2orf73
Slc41a1|Chr1:132157323-132157822	Chr1:205482252-205486035	Chr1-205483123-205483610	Chr1:205483123-205483610	SLC41A1
Cyb5r1|Chr1:134167855-134168354	Chr1:203200194-203200723	Chr1-203198971-203203409	Chr1:203198971-203203409	CYB5R1
Mtfp1|Chr11:4053529-4054028	Chr22:30485369-30485674	Chr22-30485000-30486355	Chr22:30485000-30486355	MTFP1
Ccnjl|Chr11:43836315-43836814	Chr5:159916157-159916677	Chr5-159915758-159918498	Chr5:159915758-159918498	CCNJL
Tbc1d10a|Chr11:4436537-4437036	Chr22:30088861-30089562	Chr22-30088746-30089677	Chr22:30088746-30089677	TBC1D10A
Slc22a4|Chr11:54354838-54355337	Chr5:131957793-131958205	Chr5-131957522-131958513	Chr5:131957522-131958513	SLC22A4
Ddx56|Chr11:6187758-6188257	Chr7:44477317-44477822	Chr7-44476151-44478325	Chr7:44476151-44478325	DDX56
Trpv2|Chr11:62258913-62259412	Chr17:15966227-15966755	Chr17-15965169-15967560	Chr17:15965169-15967560	TRPV2
Lrrc75a|Chr11:62495300-62495799	Chr17:16286500-16286965	Chr17-16285753-16288058	Chr17:16285753-16288058	LRRC75A
Trpv2|Chr11:62495300-62495799	Chr17:16286500-16286965	Chr17-16285753-16288058	Chr17:16285753-16288058	TRPV2
Gpr161|Chr1:164896624-164897123	Chr1:168613312-168613792	Chr1-168612287-168615448	Chr1:168612287-168615448	GPR161
Gpr161|Chr1:165641347-165641846	Chr1:167715322-167715878	Chr1-167711923-167717261	Chr1:167711923-167717261	GPR161
Map2k4|Chr11:65905433-65905932	Chr17:11880725-11881177	Chr17-11880429-11881349	Chr17:11880429-11881349	MAP2K4
Dnah9|Chr11:66121940-66122439	Chr17:11644264-11644590	Chr17-11643938-11645735	Chr17:11643938-11645735	DNAH9
Shisa6|Chr11:66384108-66384607	Chr17:11372736-11373143	Chr17-11372642-11373070	Chr17:11372642-11373070	SHISA6
Sco1|Chr11:66905739-66906238	Chr17:10845074-10845372	Chr17-10842278-10845594	Chr17:10842278-10845594	SCO1
Aldh9a1|Chr1:167608360-167608859	Chr1:165434290-165434745	Chr1-165433867-165434910	Chr1:165433867-165434910	ALDH9A1
Atp1b2|Chr11:69150351-69150850	Chr17:8093248-8094261	Chr17-8093292-8094527	Chr17:8093292-8094527	ATP1B2
Trp53|Chr11:69581259-69581758	Chr17:7685931-7686624	Chr17-7684890-7689422	Chr17:7684890-7689422	TP53
Sat2|Chr11:69613869-69614368	Chr17:7633752-7634750	Chr17-7632042-7637183	Chr17:7632042-7637183	SAT2
Rpa1|Chr11:75290822-75291321	Chr17:1908659-1909174	Chr17-1908101-1909169	Chr17:1908101-1909169	RPA1
Chml|Chr1:175385518-175386017	Chr1:241235136-241235835	Chr1-241234723-241236080	Chr1:241234723-241236080	CHML
Mrm3|Chr11:76529659-76530158	Chr17:1150735-1151259	Chr17-1150279-1157961	Chr17:1150279-1157961	MRM3
Evi2|Chr11:79710740-79711239	Chr17:31558555-31559158	Chr17-31557133-31562817	Chr17:31557133-31562817	EVI2B
Itpkb|Chr1:180268547-180269046	Chr1:226827966-226829152	Chr1-226819380-226829224	Chr1:226819380-226829224	ITPKB
Tmem98|Chr11:80602823-80603322	Chr17:32660249-32660774	Chr17-32658676-32661001	Chr17:32658676-32661001	TMEM98
Lin9|Chr1:180778071-180778570	Chr1:226109696-226110385	Chr1-226108348-226112754	Chr1:226108348-226112754	LIN9
Rrp15|Chr1:186833204-186833703	Chr1:218165365-218165931	Chr1-218163928-218165967	Chr1:218163928-218165967	RRP15
Ska2|Chr11:86894088-86894587	Chr17:59440751-59441243	Chr17-59433961-59441599	Chr17:59433961-59441599	SKA2
Ska2|Chr11:86898296-86898795	Chr17:59436886-59437260	Chr17-59433961-59441599	Chr17:59433961-59441599	SKA2
Ints7|Chr1:191817730-191818229	Chr1:211679875-211681138	Chr1-211679882-211682105	Chr1:211679882-211682105	INTS7
Mycbpap|Chr11:94970163-94970662	Chr17:50169262-50169794	Chr17-50168338-50170262	Chr17:50168338-50170262	MYCBPAP
Nr1d1|Chr11:98342477-98342976	Chr17:39621823-39622299	Chr17-39616778-39624501	Chr17:39616778-39624501	NR1D1
Nr1d1|Chr11:99065893-99066392	Chr17:40476030-40476504	Chr17-40475878-40476767	Chr17:40475878-40476767	NR1D1
Zfyve21|Chr12:112113654-112114153	Chr14:104094520-104095027	Chr14-104094225-104095363	Chr14:104094225-104095363	ZFYVE21
Adi1|Chr12:28817275-28817774	Chr2:3265977-3266482	Chr2-3265549-3267382	Chr2:3265549-3267382	ADI1
Atxn7l1|Chr12:33109472-33109971	Chr7:105934508-105935021	Chr7-105934514-105935037	Chr7:105934514-105935037	ATXN7L1
Gpr135|Chr12:72285232-72285731	Chr14:59707496-59708077	Chr14-59707563-59708652	Chr14:59707563-59708652	GPR135
Plekhg3|Chr12:76649983-76650482	Chr14:64823150-64823631	Chr14-64822541-64824019	Chr14:64822541-64824019	PLEKHG3
Snw1|Chr12:87418850-87419349	Chr14:77660762-77661270	Chr14-77659780-77661290	Chr14:77659780-77661290	SNW1
Inhba|Chr13:15715032-15715531	Chr7:41977093-41977639	Chr7-41976996-41978857	Chr7:41976996-41978857	INHBA
Psmg4|Chr13:34316686-34317185	Chr6:3427172-3427824	Chr6-3426245-3428984	Chr6:3426245-3428984	PSMG4
Kif27|Chr13:58543135-58543634	Chr9:84261108-84261394	Chr9-84260706-84261827	Chr9:84260706-84261827	KIF27
Enc1|Chr13:97435836-97436335	Chr5:74433165-74433607	Chr5-74432303-74434956	Chr5:74432303-74434956	ENC1
Gpc5|Chr14:115017565-115018064	Chr13:91313036-91313492	Chr13-91312789-91313848	Chr13:91312789-91313848	GPC5
Synpr|Chr14:12821021-12821520	Chr3:62873241-62873763	Chr3-62872628-62875966	Chr3:62872628-62875966	SYNPR
Mss51|Chr14:20798679-20799178	Chr10:73879473-73880123	Chr10-73878968-73880285	Chr10:73878968-73880285	MSS51
Chchd1|Chr14:20873231-20873730	Chr10:73940589-73941034	Chr10-73940362-73941354	Chr10:73940362-73941354	CHCHD1
Fut11|Chr14:21136811-21137310	Chr10:74265990-74266737	Chr10-74265817-74266685	Chr10:74265817-74266685	FUT11
Pou3f3|Chr1:42243329-42243828	Chr2:104416896-104417291	Chr2-104415353-104417862	Chr2:104415353-104417862	POU3F3
Chdh|Chr14:30164229-30164728	Chr3:53680050-53680566	Chr3-53679954-53680512	Chr3:53679954-53680512	CHDH
Btd|Chr14:31933793-31934292	Chr3:15982912-15983348	Chr3-15981616-15984076	Chr3:15981616-15984076	BTD
Lrp10|Chr14:54152767-54153266	Chr14:22473102-22473401	Chr14-22467456-22474087	Chr14:22467456-22474087	LRP10
Lrp10|Chr14:54227840-54228339	Chr14:22556844-22557388	Chr14-22556056-22558761	Chr14:22556056-22558761	LRP10
Ppp1r3e|Chr14:54448911-54449410	Chr14:22852955-22853461	Chr14-22852627-22854033	Chr14:22852627-22854033	PPP1R3E
1700123O20Rik|Chr14:54754479-54754978	Chr14:23160873-23161390	Chr14-23160279-23163716	Chr14:23160279-23163716	C14orf119
Bcl2l2|Chr14:54772161-54772660	Chr14:23174164-23174660	Chr14-23172545-23176027	Chr14:23172545-23176027	BCL2L2
Pck2|Chr14:55767627-55768126	Chr14:24316031-24316536	Chr14-24309663-24316861	Chr14:24309663-24316861	PCK2
Khnyn|Chr14:55781172-55781671	Chr14:24332117-24332613	Chr14-24331112-24335442	Chr14:24331112-24335442	KHNYN
Rnf17|Chr14:56375642-56376141	Chr13:24693894-24694447	Chr13-24693975-24694559	Chr13:24693975-24694559	RNF17
Setdb2|Chr14:59478576-59479075	Chr13:49401241-49401746	Chr13-49397393-49402669	Chr13:49397393-49402669	SETDB2
Dleu7|Chr14:62003291-62003790	Chr13:50486181-50486711	Chr13-50483349-50487350	Chr13:50483349-50487350	DLEU7
Pdlim2|Chr14:69852819-69853318	Chr8:22918301-22918886	Chr8-22918138-22920016	Chr8:22918138-22920016	PDLIM2
Mtrf1|Chr14:79134738-79135237	Chr13:41648554-41649432	Chr13-41646149-41653372	Chr13:41646149-41653372	MTRF1
Rarg|Chr15:102246156-102246655	Chr12:53220046-53220547	Chr12-53216652-53226248	Chr12:53216652-53226248	RARG
Rarg|Chr15:102316174-102316673	Chr12:53286910-53288126	Chr12-53286234-53288775	Chr12:53286234-53288775	RARG
Hibch|Chr1:52952983-52953482	Chr2:190180085-190180684	Chr2-190177363-190186720	Chr2:190177363-190186720	HIBCH
Sema5a|Chr15:32333409-32333908	Chr5:9452130-9452554	Chr5-9450314-9452628	Chr5:9450314-9452628	SEMA5A
Angpt1|Chr15:42962658-42963157	Chr8:107813345-107813714	Chr8-107813355-107814388	Chr8:107813355-107814388	ANGPT1
Zfp623|Chr15:76307094-76307593	Chr8:144060466-144060950	Chr8-144056507-144065141	Chr8:144056507-144065141	ZNF623
H1f0|Chr15:78623382-78623881	Chr22:37316807-37317455	Chr22-37316278-37317639	Chr22:37316278-37317639	H1F0
Chadl|Chr15:81718286-81718785	Chr22:41264339-41264706	Chr22-41260298-41268337	Chr22:41260298-41268337	CHADL
Cyb5r3|Chr15:82814701-82815200	Chr22:42168823-42169410	Chr22-42168376-42174962	Chr22:42168376-42174962	CYB5R3
Cyb5r3|Chr15:82940780-82941279	Chr22:42316945-42317476	Chr22-42312591-42319384	Chr22:42312591-42319384	CYB5R3
Lmbr1l|Chr15:99049431-99049930	Chr12:49288312-49288767	Chr12-49288080-49289055	Chr12:49288080-49289055	LMBR1L
Ccdc14|Chr16:34996044-34996543	Chr3:123618853-123619267	Chr3-123616960-123625321	Chr3:123616960-123625321	CCDC14
Arhgap31|Chr16:38673376-38673875	Chr3:119329579-119330087	Chr3-119328306-119333248	Chr3:119328306-119333248	ARHGAP31
Acadl|Chr1:66838410-66838909	Chr2:210195342-210195911	Chr2-210195066-210196168	Chr2:210195066-210196168	ACADL
Urb1|Chr16:90712235-90712734	Chr21:32258187-32258601	Chr21-32256228-32259129	Chr21:32256228-32259129	URB1
Donson|Chr16:91358430-91358929	Chr21:33199844-33200197	Chr21-33196625-33200975	Chr21:33196625-33200975	DONSON
Il10rb|Chr16:91358430-91358929	Chr21:33199844-33200197	Chr21-33196625-33200975	Chr21:33196625-33200975	IL10RB
Smim11|Chr16:92139800-92140299	Chr21:34181034-34181556	Chr21-34180383-34181878	Chr21:34180383-34181878	SMIM11A
Kctd5|Chr17:23575906-23576405	Chr16:3119976-3120463	Chr16-3118336-3126046	Chr16:3118336-3126046	KCTD5
Snrpc|Chr17:27702444-27702943	Chr6:34527019-34527556	Chr6-34525173-34528527	Chr6:34525173-34528527	SNRPC
Tbc1d22b|Chr17:29378013-29378512	Chr6:37027084-37027636	Chr6-37025806-37027132	Chr6:37025806-37027132	TBC1D22B
Pim1|Chr17:29396809-29397308	Chr6:37051366-37051859	Chr6-37048841-37052740	Chr6:37048841-37052740	PIM1
Ppil1|Chr17:29398022-29398521	Chr6:37052233-37052628	Chr6-37048841-37052740	Chr6:37048841-37052740	PPIL1
Pbx2|Chr17:34262929-34263428	Chr6:32666476-32667001	Chr6-32664219-32667295	Chr6:32664219-32667295	PBX2
Ccnd3|Chr17:47371414-47371913	Chr6:42214797-42215106	Chr6-42214704-42215529	Chr6:42214704-42215529	CCND3
Nhej1|Chr1:74880698-74881197	Chr2:218979955-218980508	Chr2-218979767-218981200	Chr2:218979767-218981200	NHEJ1
Cyp27a1|Chr1:74948783-74949282	Chr2:219057932-219058420	Chr2-219057064-219059297	Chr2:219057064-219059297	CYP27A1
Nhej1|Chr1:75016796-75017295	Chr2:219119360-219119754	Chr2-219119380-219119886	Chr2:219119380-219119886	NHEJ1
Obsl1|Chr1:75413458-75413957	Chr2:219475917-219476439	Chr2-219475857-219477395	Chr2:219475857-219477395	OBSL1
Stk11ip|Chr1:75413458-75413957	Chr2:219475917-219476439	Chr2-219475857-219477395	Chr2:219475857-219477395	STK11IP
Alkbh7|Chr17:57275130-57275629	Chr19:6767110-6767604	Chr19-6767375-6768235	Chr19:6767375-6768235	ALKBH7
Tmem198|Chr1:75936512-75937011	Chr2:220006230-220006685	Chr2-220006293-220006686	Chr2:220006293-220006686	TMEM198
Ltbp1|Chr17:74866842-74867341	Chr2:32825202-32825686	Chr2-32823140-32828140	Chr2:32823140-32828140	LTBP1
Arhgef33|Chr17:80560733-80561232	Chr2:39229786-39230084	Chr2-39229774-39230542	Chr2:39229774-39230542	ARHGEF33
Msh6|Chr17:87745943-87746442	Chr2:47520910-47521409	Chr2-47513646-47522577	Chr2:47513646-47522577	MSH6
Zfp521|Chr18:13860073-13860572	Chr18:25239694-25240202	Chr18-25239419-25239894	Chr18:25239419-25239894	ZNF521
Hbegf|Chr18:36067565-36068064	Chr5:139903390-139903883	Chr5-139900888-139907361	Chr5:139900888-139907361	HBEGF
Pcdhb18|Chr18:37217177-37217676	Chr5:141040108-141040584	Chr5-141039587-141041956	Chr5:141039587-141041956	PCDHB9
Ccdc112|Chr18:46198561-46199060	Chr5:115169655-115170256	Chr5-115168253-115171790	Chr5:115168253-115171790	CCDC112
Fbxo36|Chr1:84661073-84661572	Chr2:229675314-229675810	Chr2-229674844-229676284	Chr2:229674844-229676284	FBXO36
Synpo|Chr18:60595953-60596452	Chr5:150656439-150656959	Chr5-150655293-150659122	Chr5:150655293-150659122	SYNPO
Ndst1|Chr18:60680768-60681267	Chr5:150561002-150561789	Chr5-150554487-150561705	Chr5:150554487-150561705	NDST1
Arhgef37|Chr18:61698001-61698500	Chr5:149367363-149367966	Chr5-149366027-149368474	Chr5:149366027-149368474	ARHGEF37
Mro|Chr18:73674085-73674584	Chr18:51050911-51051575	Chr18-51050198-51051754	Chr18:51050198-51051754	MRO
Smad4|Chr18:73863295-73863794	Chr18:50819837-50820357	Chr18-50816790-50822195	Chr18:50816790-50822195	SMAD4
Hsbp1l1|Chr18:80295661-80296160	Chr18:79899287-79899771	Chr18-79899019-79905450	Chr18:79899019-79905450	HSBP1L1
Rorb|Chr19:18889130-18889629	Chr9:74727751-74728146	Chr9-74726627-74729643	Chr9:74726627-74729643	RORB
Ankmy1|Chr1:92696774-92697273	Chr2:240232781-240233291	Chr2-240231614-240238121	Chr2:240231614-240238121	ANKMY1
Ric1|Chr19:29361687-29362186	Chr9:5437653-5438166	Chr9-5435817-5439300	Chr9:5435817-5439300	RIC1
D2hgdh|Chr1:93445440-93445939	Chr2:241272547-241273202	Chr2-241269780-241274916	Chr2:241269780-241274916	D2HGDH
Rrp12|Chr19:42069052-42069551	Chr10:97609572-97610120	Chr10-97609232-97609742	Chr10:97609232-97609742	RRP12
Carns1|Chr19:4206948-4207447	Chr11:67382454-67382957	Chr11-67380873-67385880	Chr11:67380873-67385880	CARNS1
Golga7b|Chr19:42151884-42152383	Chr10:97718401-97718807	Chr10-97711646-97720063	Chr10:97711646-97720063	GOLGA7B
Nfkb2|Chr19:46607353-46607852	Chr10:102752942-102753607	Chr10-102752796-102753624	Chr10:102752796-102753624	NFKB2
Malat1|Chr19:5529228-5529727	Chr11:65818105-65818434	Chr11-65816672-65819466	Chr11:65816672-65819466	MALAT1
Cdc42ep2|Chr19:6268053-6268552	Chr11:64887938-64888328	Chr11-64887122-64889533	Chr11:64887122-64889533	CDC42EP2
Cd59b|Chr2:103871857-103872356	Chr11:33970955-33971471	Chr11-33970965-33971509	Chr11:33970965-33971509	CD59
Rcn1|Chr2:105523159-105523658	Chr11:31958031-31958530	Chr11-31957674-31958587	Chr11:31957674-31958587	RCN1
Prkcq|Chr2:11347790-11348289	Chr10:6382961-6383481	Chr10-6381285-6387222	Chr10:6381285-6387222	PRKCQ
Zfp661|Chr2:127612169-127612668	Chr2:95073866-95074295	Chr2-95071206-95080847	Chr2:95071206-95080847	ZNF2
Rassf2|Chr2:131812692-131813191	Chr20:4592446-4593018	Chr20-4592278-4593362	Chr20:4592278-4593362	RASSF2
Crnkl1|Chr2:145517300-145517799	Chr20:19583646-19584256	Chr20-19583582-19584237	Chr20:19583582-19584237	CRNKL1
Crnkl1|Chr2:145751017-145751516	Chr20:19847511-19847791	Chr20-19846444-19852626	Chr20:19846444-19852626	CRNKL1
Ralgapa2|Chr2:146414944-146415443	Chr20:20593888-20594548	Chr20-20592959-20594982	Chr20:20592959-20594982	RALGAPA2
Actr5|Chr2:158347792-158348291	Chr20:38408488-38409001	Chr20-38406204-38409714	Chr20:38406204-38409714	ACTR5
Snhg17|Chr2:158347792-158348291	Chr20:38408488-38409001	Chr20-38406204-38409714	Chr20:38406204-38409714	SNHG17
Ppdpf|Chr2:180869898-180870397	Chr20:63151583-63152097	Chr20-63151694-63152383	Chr20:63151694-63152383	PPDPF
Rgs19|Chr2:181307022-181307521	Chr20:63641642-63642427	Chr20-63639077-63644691	Chr20:63639077-63644691	RGS19
Asb6|Chr2:30613471-30613970	Chr9:129351025-129351691	Chr9-129350134-129354253	Chr9:129350134-129354253	ASB6
Ptgs1|Chr2:36011257-36011756	Chr9:122126538-122127050	Chr9-122120737-122127871	Chr9:122120737-122127871	PTGS1
Pde11a|Chr2:76029554-76030053	Chr2:177675740-177676289	Chr2-177672962-177677709	Chr2:177672962-177677709	PDE11A
Dusp19|Chr2:80356589-80357088	Chr2:182784624-182785188	Chr2-182784650-182785084	Chr2:182784650-182785084	DUSP19
Pde1a|Chr2:80446192-80446691	Chr2:182865875-182866403	Chr2-182865890-182867784	Chr2:182865890-182867784	PDE1A
Gstm7|Chr3:107612861-107613360	Chr1:110053770-110054275	Chr1-110052751-110054400	Chr1:110052751-110054400	GSTM2
Kcnc4|Chr3:107612861-107613360	Chr1:110053770-110054275	Chr1-110052751-110054400	Chr1:110052751-110054400	KCNC4
Csf1|Chr3:107680624-107681123	Chr1:110007054-110007432	Chr1-110003472-110009840	Chr1:110003472-110009840	CSF1
Kcnc4|Chr3:107680624-107681123	Chr1:110007054-110007432	Chr1-110003472-110009840	Chr1:110003472-110009840	KCNC4
Cyb561d1|Chr3:108147805-108148304	Chr1:109546215-109546720	Chr1-109545364-109549529	Chr1:109545364-109549529	CYB561D1
Tmem167b|Chr3:108147805-108148304	Chr1:109546215-109546720	Chr1-109545364-109549529	Chr1:109545364-109549529	TMEM167B
Ntng1|Chr3:109782131-109782630	Chr1:107480893-107481381	Chr1-107479965-107481641	Chr1:107479965-107481641	NTNG1
Dnttip2|Chr3:122316566-122317065	Chr1:93784564-93785080	Chr1-93784360-93785036	Chr1:93784360-93785036	DNTTIP2
Larp7|Chr3:127572483-127572982	Chr4:112604512-112604991	Chr4-112604305-112605033	Chr4:112604305-112605033	LARP7
Bcl10|Chr3:145923758-145924257	Chr1:85276601-85277066	Chr1-85275091-85280108	Chr1:85275091-85280108	BCL10
Ctbs|Chr3:146184844-146185343	Chr1:84936197-84936695	Chr1-84935911-84936683	Chr1:84935911-84936683	CTBS
Ctbs|Chr3:146783596-146784095	Chr1:84141334-84141667	Chr1-84141129-84142485	Chr1:84141129-84142485	CTBS
Wls|Chr3:159660602-159661101	Chr1:68384397-68384726	Chr1-68383872-68385479	Chr1:68383872-68385479	WLS
Nhlrc3|Chr3:53525542-53526041	Chr13:38872618-38873071	Chr13-38872249-38877391	Chr13:38872249-38877391	NHLRC3
Dclk1|Chr3:55461512-55462011	Chr13:35855576-35856041	Chr13-35854021-35859777	Chr13:35854021-35859777	DCLK1
Wwtr1|Chr3:57470158-57470657	Chr3:149534233-149534501	Chr3-149530589-149537270	Chr3:149530589-149537270	WWTR1
Commd2|Chr3:57666931-57667430	Chr3:149768883-149769350	Chr3-149765177-149773229	Chr3:149765177-149773229	COMMD2
Shc1|Chr3:89090613-89091112	Chr1:155323158-155323694	Chr1-155319623-155327022	Chr1:155319623-155327022	SHC1
Zbtb7b|Chr3:89688613-89689112	Chr1:154669653-154670115	Chr1-154669528-154670301	Chr1:154669528-154670301	ZBTB7B
Ints3|Chr3:90079343-90079842	Chr1:154183008-154183507	Chr1-154181811-154184326	Chr1:154181811-154184326	INTS3
S100a13|Chr3:90373289-90373788	Chr1:153797139-153797510	Chr1-153789259-153798675	Chr1:153789259-153798675	S100A13
Cdc42se1|Chr3:94821108-94821607	Chr1:151473300-151473894	Chr1-151472322-151475723	Chr1:151472322-151475723	CDC42SE1
Lurap1|Chr4:115856150-115856649	Chr1:46583755-46584302	Chr1-46580444-46587604	Chr1:46580444-46587604	LURAP1
Lurap1|Chr4:115963069-115963568	Chr1:46466195-46466767	Chr1-46465130-46467669	Chr1:46465130-46467669	LURAP1
Lurap1|Chr4:116182687-116183186	Chr1:46166954-46167387	Chr1-46166455-46167581	Chr1:46166455-46167581	LURAP1
Ipp|Chr4:116827728-116828227	Chr1:45300198-45300722	Chr1-45296614-45305765	Chr1:45296614-45305765	IPP
Urod|Chr4:116827728-116828227	Chr1:45300198-45300722	Chr1-45296614-45305765	Chr1:45296614-45305765	UROD
Ppih|Chr4:119115686-119116185	Chr1:42949434-42949937	Chr1-42940755-42950652	Chr1:42940755-42950652	PPIH
Pou3f1|Chr4:124277736-124278235	Chr1:38475990-38476522	Chr1-38475845-38477165	Chr1:38475845-38477165	POU3F1
Lsm10|Chr4:126110758-126111257	Chr1:36373667-36374229	Chr1-36370928-36376706	Chr1:36370928-36376706	LSM10
Txlna|Chr4:129709389-129709888	Chr1:32055455-32055750	Chr1-32054869-32056412	Chr1:32054869-32056412	TXLNA
Eif4g3|Chr4:138016929-138017428	Chr1:21149803-21150282	Chr1-21148007-21156408	Chr1:21148007-21156408	EIF4G3
Igsf21|Chr4:140285863-140286362	Chr1:18058557-18058959	Chr1-18058551-18059307	Chr1:18058551-18059307	IGSF21
Ubiad1|Chr4:148512921-148513420	Chr1:11158861-11159703	Chr1-11157249-11159056	Chr1:11157249-11159056	UBIAD1
Tmem201|Chr4:149854140-149854639	Chr1:9428760-9429219	Chr1-9423339-9431155	Chr1:9423339-9431155	TMEM201
Cep104|Chr4:154334659-154335158	Chr1:3417931-3418407	Chr1-3417716-3420969	Chr1:3417716-3420969	CEP104
Pex10|Chr4:155054614-155055113	Chr1:2429968-2430493	Chr1-2424696-2434157	Chr1:2424696-2434157	PEX10
Cfap74|Chr4:155387086-155387585	Chr1:2027899-2028433	Chr1-2027890-2028233	Chr1:2027890-2028233	CFAP74
Galt|Chr4:41707029-41707528	Chr9:34601955-34602456	Chr9-34601192-34604427	Chr9:34601192-34604427	GALT
Exosc3|Chr4:44917796-44918295	Chr9:37337108-37337625	Chr9-37336029-37338329	Chr9:37336029-37338329	EXOSC3
Anp32b|Chr4:46611111-46611610	Chr9:98205254-98206388	Chr9-98205111-98206377	Chr9:98205111-98206377	ANP32B
Galnt12|Chr4:47122012-47122511	Chr9:98848395-98849026	Chr9-98847903-98849400	Chr9:98847903-98849400	GALNT12
Tgfbr1|Chr4:47255554-47256053	Chr9:98998716-98999265	Chr9-98997344-98999857	Chr9:98997344-98999857	TGFBR1
Tgfbr1|Chr4:47502568-47503067	Chr9:99266431-99266926	Chr9-99266121-99267189	Chr9:99266121-99267189	TGFBR1
E130308A19Rik|Chr4:59783620-59784119	Chr9:112717825-112718399	Chr9-112716674-112720681	Chr9:112716674-112720681	KIAA1958
Slc31a2|Chr4:62583215-62583714	Chr9:113463414-113463882	Chr9-113463202-113464244	Chr9:113463202-113464244	SLC31A2
Usp1|Chr4:98702434-98702933	Chr1:62144061-62144510	Chr1-62143820-62144684	Chr1:62143820-62144684	USP1
Alg6|Chr4:99572641-99573140	Chr1:63198272-63198784	Chr1-63198211-63199782	Chr1:63198211-63199782	ALG6
Mmab|Chr5:114639233-114639732	Chr12:109805142-109805654	Chr12-109804707-109806224	Chr12:109804707-109806224	MMAB
Mvk|Chr5:114743825-114744324	Chr12:109951261-109951807	Chr12-109951753-109953088	Chr12:109951753-109953088	MVK
Gatc|Chr5:115318997-115319496	Chr12:120475015-120475348	Chr12-120473480-120478071	Chr12:120473480-120478071	GATC
Pxn|Chr5:115347535-115348034	Chr12:120439613-120439901	Chr12-120437157-120440252	Chr12:120437157-120440252	PXN
Srsf9|Chr5:115441368-115441867	Chr12:120356400-120356978	Chr12-120356266-120357322	Chr12:120356266-120357322	SRSF9
Rasal1|Chr5:120483301-120483800	Chr12:113392913-113393663	Chr12-113391744-113400755	Chr12:113391744-113400755	RASAL1
Iqcd|Chr5:120620575-120621074	Chr12:113174531-113174832	Chr12-113174035-113175454	Chr12:113174035-113175454	IQCD
Ddx54|Chr5:120680099-120680598	Chr12:113097629-113098158	Chr12-113096038-113100440	Chr12:113096038-113100440	DDX54
Rilpl2|Chr5:124424713-124425212	Chr12:123363884-123364448	Chr12-123362459-123366770	Chr12:123362459-123366770	RILPL2
Stx1a|Chr5:135106613-135107112	Chr7:73624302-73624711	Chr7-73623193-73624868	Chr7:73623193-73624868	STX1A
Tbl2|Chr5:135106613-135107112	Chr7:73624302-73624711	Chr7-73623193-73624868	Chr7:73623193-73624868	TBL2
Bud31|Chr5:145104310-145104809	Chr7:99358204-99359656	Chr7-99357490-99359080	Chr7:99357490-99359080	BUD31
Grk4|Chr5:35042956-35043455	Chr4:3443441-3443903	Chr4-3436380-3445091	Chr4:3436380-3445091	GRK4
Trmt44|Chr5:35628713-35629212	Chr4:8340808-8341245	Chr4-8340098-8344404	Chr4:8340098-8344404	TRMT44
Wfs1|Chr5:37001910-37002409	Chr4:6250594-6250969	Chr4-6250327-6253209	Chr4:6250327-6253209	WFS1
Man2b2|Chr5:37010589-37011088	Chr4:6224394-6225131	Chr4-6221211-6226258	Chr4:6221211-6226258	MAN2B2
Bend4|Chr5:67011222-67011721	Chr4:41656832-41657347	Chr4-41655704-41658326	Chr4:41655704-41658326	BEND4
Srd5a3|Chr5:75871101-75871600	Chr4:54998906-54999501	Chr4-54998732-54999576	Chr4:54998732-54999576	SRD5A3
Hopx|Chr5:77354398-77354897	Chr4:57037899-57038434	Chr4-57037557-57038771	Chr4:57037557-57038771	HOPX
Noa1|Chr5:77459766-77460265	Chr4:57163499-57163988	Chr4-57162981-57165578	Chr4:57162981-57165578	NOA1
Slc6a11|Chr6:113891060-113891559	Chr3:10505290-10505934	Chr3-10503212-10508102	Chr3:10503212-10508102	SLC6A11
Sec13|Chr6:114094142-114094641	Chr3:10764026-10764539	Chr3-10761333-10766594	Chr3:10761333-10766594	SEC13
Slc6a11|Chr6:114094142-114094641	Chr3:10764026-10764539	Chr3-10761333-10766594	Chr3:10761333-10766594	SLC6A11
Fbxl14|Chr6:119237393-119237892	Chr12:1916874-1917577	Chr12-1915298-1919159	Chr12:1915298-1919159	FBXL14
Wnt5b|Chr6:119328685-119329184	Chr12:1822198-1822703	Chr12-1819572-1822420	Chr12:1819572-1822420	WNT5B
Wnt5b|Chr6:119341358-119341857	Chr12:1804416-1805026	Chr12-1803237-1808055	Chr12:1803237-1808055	WNT5B
Nop2|Chr6:124904096-124904595	Chr12:6778248-6778717	Chr12-6777347-6780386	Chr12:6777347-6780386	NOP2
Clstn3|Chr6:124917772-124918271	Chr12:6766038-6766525	Chr12-6762468-6769752	Chr12:6762468-6769752	CLSTN3
Nop2|Chr6:125361593-125362092	Chr12:6329226-6329769	Chr12-6321434-6330782	Chr12:6321434-6330782	NOP2
Cadps2|Chr6:24318327-24318826	Chr7:123346702-123347204	Chr7-123346477-123347775	Chr7:123346477-123347775	CADPS2
Slc35b4|Chr6:34485606-34486105	Chr7:134659398-134660227	Chr7-134659555-134662602	Chr7:134659555-134662602	SLC35B4
Scrn1|Chr6:54629659-54630158	Chr7:30061739-30062253	Chr7-30061767-30063019	Chr7:30061767-30063019	SCRN1
Ggcx|Chr6:72164830-72165329	Chr2:85827312-85827909	Chr2-85826959-85828618	Chr2:85826959-85828618	GGCX
Fam136a|Chr6:86102821-86103320	Chr2:70685678-70686256	Chr2-70685589-70687184	Chr2:70685589-70687184	FAM136A
Tpra1|Chr6:89008444-89008943	Chr3:127426779-127427322	Chr3-127425438-127427753	Chr3:127425438-127427753	TPRA1
Slc41a3|Chr6:90435090-90435589	Chr3:126389200-126389581	Chr3-126387640-126390928	Chr3:126387640-126390928	SLC41A3
Fam168a|Chr7:100582586-100583085	Chr11:73787889-73788460	Chr11-73785594-73792401	Chr11:73785594-73792401	FAM168A
Rrp8|Chr7:105527279-105527778	Chr11:6362955-6363542	Chr11-6362838-6363779	Chr11:6362838-6363779	RRP8
Ilk|Chr7:105685487-105685986	Chr11:6538079-6538657	Chr11-6538347-6542721	Chr11:6538347-6542721	ILK
Spon1|Chr7:113773960-113774459	Chr11:13970881-13971489	Chr11-13970938-13971524	Chr11:13970938-13971524	SPON1
Ears2|Chr7:122251389-122251888	Chr16:23801258-23801726	Chr16-23800824-23802193	Chr16:23800824-23802193	EARS2
Coro1a|Chr7:126704008-126704507	Chr16:30183852-30184328	Chr16-30182223-30188490	Chr16:30182223-30188490	CORO1A
Coro1a|Chr7:126704568-126705067	Chr16:30183253-30183792	Chr16-30182223-30188490	Chr16:30182223-30188490	CORO1A
Ino80e|Chr7:126754801-126755300	Chr16:30124368-30124722	Chr16-30120207-30124898	Chr16:30120207-30124898	INO80E
Plpp4|Chr7:129648881-129649380	Chr10:120941773-120943227	Chr10-120942209-120950600	Chr10:120942209-120950600	PLPP4
Uros|Chr7:134007592-134008091	Chr10:126147412-126147942	Chr10-126147531-126149301	Chr10:126147531-126149301	UROS
Ptpre|Chr7:135614861-135615360	Chr10:127995883-127996386	Chr10-127995852-128003560	Chr10:127995852-128003560	PTPRE
Slc8a2|Chr7:16475655-16476154	Chr19:47020485-47020997	Chr19-47019261-47021815	Chr19:47019261-47021815	SLC8A2
Nectin2|Chr7:19824064-19824563	Chr19:44747330-44747825	Chr19-44745932-44751277	Chr19:44745932-44751277	NECTIN2
Arhgef1|Chr7:25121813-25122312	Chr19:42123250-42123899	Chr19-42120950-42123330	Chr19:42120950-42123330	ARHGEF1
Rps19|Chr7:25121813-25122312	Chr19:42123250-42123899	Chr19-42120950-42123330	Chr19:42120950-42123330	RPS19
Sirt2|Chr7:29039509-29040008	Chr19:38544280-38544873	Chr19-38543068-38545512	Chr19:38543068-38545512	SIRT2
Spint2|Chr7:29039509-29040008	Chr19:38544280-38544873	Chr19-38543068-38545512	Chr19:38543068-38545512	SPINT2
Ndufa3|Chr7:3331456-3331955	Chr19:53908056-53908554	Chr19-53906332-53910620	Chr19:53906332-53910620	NDUFA3
Magel2|Chr7:62348004-62348503	Chr15:23687121-23687664	Chr15-23686123-23688269	Chr15:23686123-23688269	MAGEL2
Zfp667|Chr7:6414903-6415402	Chr19:56642864-56643361	Chr19-56642909-56644154	Chr19:56642909-56644154	ZNF667
Abhd17c|Chr7:84355973-84356472	Chr15:80455858-80456494	Chr15-80454214-80462216	Chr15:80454214-80462216	ABHD17C
Gdpd5|Chr7:99229293-99229792	Chr11:75722755-75723465	Chr11-75722403-75723722	Chr11:75722403-75723722	GDPD5
Terb1|Chr8:104540941-104541440	Chr16:66844555-66845073	Chr16-66844111-66845093	Chr16:66844111-66845093	TERB1
Tradd|Chr8:105515866-105516365	Chr16:67427965-67428581	Chr16-67427699-67434581	Chr16:67427699-67434581	TRADD
Pskh1|Chr8:105596261-105596760	Chr16:67520967-67521483	Chr16-67519397-67523104	Chr16:67519397-67523104	PSKH1
Zfp90|Chr8:106270751-106271250	Chr16:68377936-68378527	Chr16-68377387-68378647	Chr16:68377387-68378647	ZFP90
Smpd3|Chr8:106403225-106403724	Chr16:68510132-68510963	Chr16-68509703-68510867	Chr16:68509703-68510867	SMPD3
Tmem231|Chr8:111677992-111678491	Chr16:75199159-75199657	Chr16-75198894-75202798	Chr16:75198894-75202798	TMEM231
Klhl36|Chr8:120144394-120144893	Chr16:85065901-85066548	Chr16-85065785-85066697	Chr16:85065785-85066697	KLHL36
Zfpm1|Chr8:122273039-122273538	Chr16:88442925-88443266	Chr16-88440751-88447056	Chr16:88440751-88447056	ZFPM1
Eri1|Chr8:35206249-35206748	Chr8:9324407-9324981	Chr8-9324479-9325152	Chr8:9324479-9325152	ERI1
Ankrd37|Chr8:45816925-45817424	Chr4:185597450-185598057	Chr4-185596633-185598432	Chr4:185596633-185598432	ANKRD37
Dctd|Chr8:47743330-47743829	Chr4:183405723-183407539	Chr4-183404670-183409971	Chr4:183404670-183409971	DCTD
Ell|Chr8:70684249-70684748	Chr19:18294501-18295042	Chr19-18286122-18295999	Chr19:18286122-18295999	ELL
Lsm4|Chr8:70684249-70684748	Chr19:18294501-18295042	Chr19-18286122-18295999	Chr19:18286122-18295999	LSM4
Arhgap10|Chr8:77120678-77121177	Chr4:148215259-148215832	Chr4-148214411-148215811	Chr4:148214411-148215811	ARHGAP10
Ky|Chr9:102544919-102545418	Chr3:134600812-134601297	Chr3-134600394-134603591	Chr3:134600394-134603591	KY
Amotl2|Chr9:102690003-102690502	Chr3:134406517-134406997	Chr3-134404086-134410768	Chr3:134404086-134410768	AMOTL2
Ccdc71|Chr9:108452182-108452681	Chr3:49171325-49171813	Chr3-49170589-49174252	Chr3:49170589-49174252	CCDC71
Trim71|Chr9:114415694-114416193	Chr3:33074401-33074818	Chr3-33074388-33074976	Chr3:33074388-33074976	TRIM71
Slc25a38|Chr9:120037345-120037844	Chr3:39220677-39221117	Chr3-39219907-39221477	Chr3:39219907-39221477	SLC25A38
Hhatl|Chr9:121477192-121477691	Chr3:42229730-42230280	Chr3-42229486-42230656	Chr3:42229486-42230656	HHATL
Ankrd49|Chr9:14518011-14518510	Chr11:94926989-94927587	Chr11-94926048-94928621	Chr11:94926048-94928621	ANKRD49
Ppan|Chr9:20713474-20713973	Chr19:9906649-9907022	Chr19-9905675-9907335	Chr19:9905675-9907335	PPAN
Foxred1|Chr9:34861719-34862218	Chr11:126607228-126607757	Chr11-126606697-126609442	Chr11:126606697-126609442	FOXRED1
Hepacam|Chr9:36894874-36895373	Chr11:125429025-125429522	Chr11-125428722-125430324	Chr11:125428722-125430324	HEPACAM
Zfp202|Chr9:40228033-40228532	Chr11:123707528-123707852	Chr11-123707563-123707935	Chr11:123707563-123707935	ZNF202
Scn3b|Chr9:40381918-40382417	Chr11:123519137-123519608	Chr11-123517984-123520231	Chr11:123517984-123520231	SCN3B
Scn3b|Chr9:40583502-40584001	Chr11:123301577-123302094	Chr11-123301253-123302854	Chr11:123301253-123302854	SCN3B
Ccdc84|Chr9:44603371-44603870	Chr11:118792700-118793225	Chr11-118788076-118793663	Chr11:118788076-118793663	CCDC84
Usp28|Chr9:49273532-49274031	Chr11:113506014-113506450	Chr11-113503858-113508904	Chr11:113503858-113508904	USP28
Ppp2r1b|Chr9:51292615-51293114	Chr11:111282908-111283704	Chr11-111281696-111284689	Chr11:111281696-111284689	PPP2R1B
Dnaja4|Chr9:55046517-55047016	Chr15:78638420-78638945	Chr15-78638677-78639148	Chr15:78638677-78639148	DNAJA4
Iqch|Chr9:63918793-63919292	Chr15:66850366-66850890	Chr15-66849839-66851966	Chr15:66849839-66851966	IQCH
Eef1a1|Chr9:78516020-78516519	Chr6:73577237-73577922	Chr6-73577581-73582158	Chr6:73577581-73582158	EEF1A1
U2surp|Chr9:95391850-95392349	Chr3:143135260-143135847	Chr3-143135207-143135608	Chr3:143135207-143135608	U2SURP
Pxylp1|Chr9:96986754-96987253	Chr3:141077067-141077493	Chr3-141076012-141078541	Chr3:141076012-141078541	PXYLP1
Bex4|ChrX:136624797-136625296	ChrX:103533293-103533777	ChrX-103533340-103534245	ChrX:103533340-103534245	BEX4
Hsd17b10|ChrX:152352760-152353259	ChrX:53071581-53072008	ChrX-53071201-53073731	ChrX:53071201-53073731	HSD17B10
Bcorl1|ChrX:47992545-47993044	ChrX:129606871-129607364	ChrX-129603123-129608086	ChrX:129603123-129608086	BCORL1
Plekhg1|Chr10:3572882-3573381	Chr6:150418003-150418561	Chr6-150417910-150419794	Chr6:150417910-150419794	PLEKHG1
Plekhg1|Chr10:3978271-3978770	Chr6:150875782-150876182	Chr6-150875253-150877216	Chr6:150875253-150877216	PLEKHG1
Fbxo7|Chr10:86193834-86194333	Chr22:32672481-32673000	Chr22-32672069-32674117	Chr22:32672069-32674117	FBXO7
Tmcc3|Chr10:94526814-94527313	Chr12:94638376-94638890	Chr12-94634050-94639165	Chr12:94634050-94639165	TMCC3
Mxra7|Chr11:116572969-116573468	Chr17:76444826-76445390	Chr17-76444325-76447294	Chr17:76444325-76447294	MXRA7
Lrrn2|Chr1:132851686-132852185	Chr1:204713402-204713892	Chr1-204713567-204713790	Chr1:204713567-204713790	LRRN2
Msi2|Chr11:88654938-88655437	Chr17:57329443-57330014	Chr17-57328987-57330866	Chr17:57328987-57330866	MSI2
Mboat1|Chr13:30253650-30254149	Chr6:20096488-20096880	Chr6-20094035-20099312	Chr6:20094035-20099312	MBOAT1
Jarid2|Chr13:44786218-44786717	Chr6:15318248-15318737	Chr6-15316312-15319714	Chr6:15316312-15319714	JARID2
Ankrd39|Chr1:36501218-36501717	Chr2:96800909-96802291	Chr2-96798979-96802454	Chr2:96798979-96802454	ANKRD39
Abhd6|Chr14:8032497-8032996	Chr3:58260663-58261199	Chr3-58258061-58263842	Chr3:58258061-58263842	ABHD6
Tmeff2|Chr1:50897618-50898117	Chr2:192215470-192216009	Chr2-192214005-192220615	Chr2:192214005-192220615	TMEFF2
Chrac1|Chr15:73222645-73223144	Chr8:140692832-140693150	Chr8-140691379-140701183	Chr8:140691379-140701183	CHRAC1
Apod|Chr16:30984787-30985286	Chr3:195119393-195119910	Chr3-195118332-195121312	Chr3:195118332-195121312	APOD
Tnfrsf21|Chr17:43229770-43230269	Chr6:47097343-47097846	Chr6-47094296-47098691	Chr6:47094296-47098691	TNFRSF21
Taf8|Chr17:47371414-47371913	Chr6:42214797-42215106	Chr6-42214704-42215529	Chr6:42214704-42215529	TAF8
Kcnk12|Chr17:87763086-87763585	Chr2:47534109-47534639	Chr2-47533864-47535299	Chr2:47533864-47535299	KCNK12
Slc12a2|Chr18:57887247-57887746	Chr5:128100780-128101275	Chr5-128099432-128103887	Chr5:128099432-128103887	SLC12A2
Cbln2|Chr18:86712850-86713349	Chr18:72541879-72542401	Chr18-72541710-72544955	Chr18:72541710-72544955	CBLN2
Scd2|Chr19:44184262-44184761	Chr10:100319681-100320183	Chr10-100313832-100322363	Chr10:100313832-100322363	SCD
Btrc|Chr19:45812086-45812585	Chr10:101839638-101840131	Chr10-101838354-101844620	Chr10:101838354-101844620	BTRC
Bdnf|Chr2:109693260-109693759	Chr11:27700305-27700832	Chr11-27698701-27701913	Chr11:27698701-27701913	BDNF
Ciz1|Chr2:32317838-32318337	Chr9:128244956-128245471	Chr9-128242229-128246802	Chr9:128242229-128246802	CIZ1
Zbtb43|Chr2:33746380-33746879	Chr9:126491203-126491740	Chr9-126485799-126492963	Chr9:126485799-126492963	ZBTB43
Arfgap2|Chr2:91181915-91182414	Chr11:47270657-47271170	Chr11-47267806-47273090	Chr11:47267806-47273090	ARFGAP2
Mov10|Chr3:104967893-104968392	Chr1:112501724-112502304	Chr1-112501389-112503203	Chr1:112501389-112503203	MOV10
Kcnd3|Chr3:105521067-105521566	Chr1:111920289-111920800	Chr1-111919548-111922387	Chr1:111919548-111922387	KCND3
Pitx2|Chr3:129213562-129214061	Chr4:110622972-110623468	Chr4-110617940-110623518	Chr4:110617940-110623518	PITX2
Fdps|Chr3:89340438-89340937	Chr1:155061414-155061937	Chr1-155059941-155064767	Chr1:155059941-155064767	FDPS
Rnf220|Chr4:117654249-117654748	Chr1:44242635-44243168	Chr1-44239226-44243762	Chr1:44239226-44243762	RNF220
Pou3f1|Chr4:124667461-124667960	Chr1:38034954-38035471	Chr1-38034260-38035592	Chr1:38034260-38035592	POU3F1
Nkain1|Chr4:130539583-130540082	Chr1:31190087-31190500	Chr1-31189625-31191189	Chr1:31189625-31191189	NKAIN1
Rusc2|Chr4:43530512-43531011	Chr9:35696477-35696882	Chr9-35696338-35698196	Chr9:35696338-35698196	RUSC2
Tmeff1|Chr4:48643686-48644185	Chr9:100554801-100555395	Chr9-100552581-100557526	Chr9:100552581-100557526	TMEFF1
Fbxw8|Chr5:118169620-118170119	Chr12:116880984-116881548	Chr12-116878814-116883249	Chr12:116878814-116883249	FBXW8
Sorcs2|Chr5:36085548-36086047	Chr4:7630490-7631088	Chr4-7629928-7631807	Chr4:7629928-7631807	SORCS2
Apoe|Chr7:19824064-19824563	Chr19:44747330-44747825	Chr19-44745932-44751277	Chr19:44745932-44751277	APOE
Aplp1|Chr7:30532805-30533304	Chr19:35777370-35777862	Chr19-35773927-35783003	Chr19:35773927-35783003	APLP1
Mag|Chr7:30532805-30533304	Chr19:35777370-35777862	Chr19-35773927-35783003	Chr19:35773927-35783003	MAG
Zfp536|Chr7:37704286-37704785	Chr19:30295848-30296445	Chr19-30291622-30301359	Chr19:30291622-30301359	ZNF536
Emc8|Chr8:120459626-120460125	Chr16:85514311-85514819	Chr16-85512987-85516490	Chr16:85512987-85516490	EMC8
Isyna1|Chr8:70374487-70374986	Chr19:18789929-18790496	Chr19-18789639-18790614	Chr19:18789639-18790614	ISYNA1
Abhd14b|Chr9:106306631-106307130	Chr3:52123271-52123618	Chr3-52115965-52124558	Chr3:52115965-52124558	ABHD14B
Gjb1|ChrX:101383359-101383858	ChrX:71222837-71223352	ChrX-71220391-71228056	ChrX:71220391-71228056	GJB1
Prim1|Chr10:127641696-127642195	Chr12:57112235-57112788	Chr12-57109953-57113100	Chr12:57109953-57113100	PRIM1
Armt1|Chr10:4334210-4334709	Chr6:151325250-151325885	Chr6-151323804-151326367	Chr6:151323804-151326367	ARMT1
Fam13c|Chr10:70296496-70296995	Chr10:59626201-59626758	Chr10-59625603-59626905	Chr10:59625603-59626905	FAM13C
Col18a1|Chr10:77206459-77206958	Chr21:45364008-45364349	Chr21-45357370-45366008	Chr21:45357370-45366008	COL18A1
Chst11|Chr10:83149230-83149729	Chr12:104682635-104683180	Chr12-104682760-104683197	Chr12:104682760-104683197	CHST11
Igf1|Chr10:87486166-87486665	Chr12:102964878-102965412	Chr12-102964383-102966983	Chr12:102964383-102966983	IGF1
Rab5c|Chr11:100407991-100408490	Chr17:41801407-41801974	Chr17-41800358-41804046	Chr17:41800358-41804046	RAB5C
Mlx|Chr11:101323518-101324017	Chr17:42843229-42843763	Chr17-42842960-42843962	Chr17:42842960-42843962	MLX
Cep112|Chr11:108025638-108026137	Chr17:66673805-66674349	Chr17-66670786-66677315	Chr17:66670786-66677315	CEP112
Rbfox3|Chr11:118569478-118569977	Chr17:79183188-79183692	Chr17-79183217-79184278	Chr17:79183217-79184278	RBFOX3
Pno1|Chr11:17160203-17160702	Chr2:68250972-68251519	Chr2-68249914-68257934	Chr2:68249914-68257934	PNO1
Rab1a|Chr11:20655578-20656077	Chr2:64627322-64627924	Chr2-64624765-64631548	Chr2:64624765-64631548	RAB1A
Pik3c2b|Chr1:132920988-132921487	Chr1:204637582-204638098	Chr1-204637111-204639324	Chr1:204637111-204639324	PIK3C2B
Pik3c2b|Chr1:132982652-132983151	Chr1:204565740-204566303	Chr1-204565401-204569490	Chr1:204565401-204569490	PIK3C2B
Ccdc157|Chr11:3773617-3774116	Chr22:30803700-30804225	Chr22-30802157-30803938	Chr22:30802157-30803938	CCDC157
P4ha2|Chr11:53627821-53628320	Chr5:132662982-132663316	Chr5-132661372-132664652	Chr5:132661372-132664652	P4HA2
Gpx3|Chr11:54904216-54904715	Chr5:151022495-151023045	Chr5-151022361-151024033	Chr5:151022361-151024033	GPX3
Pigl|Chr11:62317662-62318161	Chr17:16032104-16032600	Chr17-16031989-16033156	Chr17:16031989-16033156	PIGL
Mpzl1|Chr1:165641347-165641846	Chr1:167715322-167715878	Chr1-167711923-167717261	Chr1:167711923-167717261	MPZL1
Dvl2|Chr11:70055530-70056029	Chr17:7177293-7177886	Chr17-7176694-7178573	Chr17:7176694-7178573	DVL2
Sarm1|Chr11:78837960-78838459	Chr17:27880129-27880546	Chr17-27879594-27881165	Chr17:27879594-27881165	SARM1
Ephx1|Chr1:180778071-180778570	Chr1:226109696-226110385	Chr1-226108348-226112754	Chr1:226108348-226112754	EPHX1
Cuedc1|Chr11:87770899-87771398	Chr17:58316845-58317922	Chr17-58317337-58317785	Chr17:58317337-58317785	CUEDC1
Srsf1|Chr11:88086785-88087284	Chr17:57965491-57965892	Chr17-57961879-57966275	Chr17:57961879-57966275	SRSF1
Prox1|Chr1:189972946-189973445	Chr1:214213978-214214475	Chr1-214213205-214214750	Chr1:214213205-214214750	PROX1
Paqr8|Chr1:20941247-20941746	Chr6:52411004-52411456	Chr6-52410248-52411454	Chr6:52410248-52411454	PAQR8
Adssl1|Chr12:112473671-112474170	Chr14:104563902-104564449	Chr14-104562956-104564628	Chr14:104562956-104564628	ADSSL1
Inf2|Chr12:112473671-112474170	Chr14:104563902-104564449	Chr14-104562956-104564628	Chr14:104562956-104564628	INF2
B3gat2|Chr1:23826997-23827496	Chr6:70884315-70884888	Chr6-70884046-70884997	Chr6:70884046-70884997	B3GAT2
G2e3|Chr12:50943566-50944065	Chr14:30214410-30214916	Chr14-30214178-30215084	Chr14:30214178-30215084	G2E3
Npc2|Chr12:84532057-84532556	Chr14:74203407-74203907	Chr14-74203504-74204907	Chr14:74203504-74204907	NPC2
Lin52|Chr12:84784419-84784918	Chr14:74501055-74501610	Chr14-74500187-74503384	Chr14:74500187-74503384	LIN52
Eif2b2|Chr12:85572103-85572602	Chr14:75401048-75401904	Chr14-75399603-75402394	Chr14:75399603-75402394	EIF2B2
Bphl|Chr13:34076608-34077107	Chr6:3156103-3156678	Chr6-3155280-3163809	Chr6:3155280-3163809	BPHL
Unc5a|Chr13:54937816-54938315	Chr5:176793532-176794038	Chr5-176792701-176793729	Chr5:176792701-176793729	UNC5A
Pdcd6|Chr13:74166624-74167123	Chr5:473003-473414	Chr5-470937-477767	Chr5:470937-477767	PDCD6
Mrps27|Chr13:99609304-99609803	Chr5:72014077-72014669	Chr5-72013258-72016085	Chr5:72013258-72016085	MRPS27
Klf12|Chr14:100210959-100211458	Chr13:74062838-74063318	Chr13-74061889-74064074	Chr13:74061889-74064074	KLF12
Fut11|Chr14:20765835-20766334	Chr10:73848936-73849483	Chr10-73848328-73851998	Chr10:73848328-73851998	FUT11
Bcl2l2|Chr14:54748995-54749494	Chr14:23154889-23155441	Chr14-23153758-23155919	Chr14:23153758-23155919	BCL2L2
Ngdn|Chr14:55148401-55148900	Chr14:23631766-23632335	Chr14-23631687-23633538	Chr14:23631687-23633538	NGDN
Rec8|Chr14:55497220-55497719	Chr14:24058237-24058735	Chr14-24056171-24060401	Chr14:24056171-24060401	REC8
Rec8|Chr14:55781172-55781671	Chr14:24332117-24332613	Chr14-24331112-24335442	Chr14:24331112-24335442	REC8
Khnyn|Chr14:55885815-55886314	Chr14:24430755-24431269	Chr14-24427006-24432899	Chr14:24427006-24432899	KHNYN
Ptk2b|Chr14:66636074-66636573	Chr8:26865985-26866456	Chr8-26863627-26867665	Chr8:26863627-26867665	PTK2B
Med4|Chr14:73382716-73383215	Chr13:48235393-48235978	Chr13-48231135-48237822	Chr13:48231135-48237822	MED4
Gpalpp1|Chr14:76076537-76077036	Chr13:45047900-45048340	Chr13-45046142-45049934	Chr13:45046142-45049934	GPALPP1
Gpalpp1|Chr14:76077106-76077605	Chr13:45047356-45047825	Chr13-45046142-45049934	Chr13:45046142-45049934	GPALPP1
Zfp740|Chr15:102178182-102178681	Chr12:53159204-53159754	Chr12-53159053-53160297	Chr12:53159053-53160297	ZNF740
Mtmr12|Chr15:12366138-12366637	Chr5:32100204-32100743	Chr5-32098018-32101620	Chr5:32098018-32101620	MTMR12
Pdzd2|Chr15:12586068-12586567	Chr5:31808976-31809572	Chr5-31808298-31810330	Chr5:31808298-31810330	PDZD2
Oxr1|Chr15:41685579-41686078	Chr8:106556524-106557066	Chr8-106556525-106557053	Chr8:106556525-106557053	OXR1
Zhx1|Chr15:57798629-57799128	Chr8:122915930-122916482	Chr8-122913378-122917032	Chr8:122913378-122917032	ZHX1
Lifr|Chr15:6909632-6910131	Chr5:38809689-38810195	Chr5-38808879-38810780	Chr5:38808879-38810780	LIFR
Dennd3|Chr15:73554696-73555195	Chr8:141174668-141175338	Chr8-141174259-141175686	Chr8:141174259-141175686	DENND3
Scrib|Chr15:76034277-76034776	Chr8:143771624-143772137	Chr8-143770643-143772110	Chr8:143770643-143772110	SCRIB
Fbxl6|Chr15:76816767-76817266	Chr8:144684152-144684702	Chr8-144678173-144687229	Chr8:144678173-144687229	FBXL6
Parvb|Chr15:84212134-84212633	Chr22:43993290-43993633	Chr22-43992135-43996613	Chr22:43992135-43996613	PARVB
Prr5|Chr15:84627199-84627698	Chr22:44621974-44622502	Chr22-44621693-44622515	Chr22:44621693-44622515	PRR5
Tmbim6|Chr15:99664940-99665439	Chr12:50050943-50051395	Chr12-50050068-50052118	Chr12:50050068-50052118	TMBIM6
Zbtb20|Chr16:42445001-42445500	Chr3:115512505-115512980	Chr3-115512411-115513625	Chr3:115512411-115513625	ZBTB20
Cdip1|Chr16:4558461-4558960	Chr16:4271692-4272187	Chr16-4269274-4276090	Chr16:4269274-4276090	CDIP1
Rpl24|Chr16:55821959-55822458	Chr3:101849184-101849722	Chr3-101846794-101852292	Chr3:101846794-101852292	RPL24
Epha3|Chr16:63856844-63857343	Chr3:89114538-89115023	Chr3-89113772-89115789	Chr3:89113772-89115789	EPHA3
Usp16|Chr16:87840857-87841356	Chr21:29476062-29476885	Chr21-29472573-29478599	Chr21:29472573-29478599	USP16
Smim11|Chr16:91917736-91918235	Chr21:33894612-33895237	Chr21-33894489-33896133	Chr21:33894489-33896133	SMIM11A
Ttc3|Chr16:94302782-94303281	Chr21:36980445-36981018	Chr21-36980135-36981250	Chr21:36980135-36981250	TTC3
Mtch1|Chr17:29467514-29468013	Chr6:37141581-37142190	Chr6-37141520-37142125	Chr6:37141520-37142125	MTCH1
Enpp4|Chr17:44026177-44026676	Chr6:46240876-46241403	Chr6-46240008-46241640	Chr6:46240008-46241640	ENPP4
Tmem151b|Chr17:46030348-46030847	Chr6:43771747-43772230	Chr6-43768343-43776684	Chr6:43768343-43776684	TMEM151B
Foxp4|Chr17:48057324-48057823	Chr6:41413162-41413688	Chr6-41411807-41418476	Chr6:41411807-41418476	FOXP4
St6gal2|Chr17:55479252-55479751	Chr2:106848676-106850580	Chr2-106850551-106851463	Chr2:106850551-106851463	ST6GAL2
Lbh|Chr17:72602836-72603335	Chr2:29919774-29920298	Chr2-29919824-29923570	Chr2:29919824-29923570	LBH
Dync2li1|Chr17:84865057-84865556	Chr2:44075635-44075991	Chr2-44073109-44077431	Chr2:44073109-44077431	DYNC2LI1
Thada|Chr17:84865057-84865556	Chr2:44075635-44075991	Chr2-44073109-44077431	Chr2:44073109-44077431	THADA
Ttc7|Chr17:87236852-87237351	Chr2:46881923-46882375	Chr2-46881634-46882829	Chr2:46881634-46882829	TTC7A
Kctd1|Chr18:15063389-15063888	Chr18:26548352-26548874	Chr18-26543559-26551391	Chr18:26543559-26551391	KCTD1
Chst9|Chr18:16216771-16217270	Chr18:27605125-27605641	Chr18-27604982-27605898	Chr18:27604982-27605898	CHST9
Dctn4|Chr18:60888260-60888759	Chr5:150320198-150320649	Chr5-150316709-150322189	Chr5:150316709-150322189	DCTN4
Ngef|Chr1:87292726-87293225	Chr2:232669061-232669389	Chr2-232661773-232670408	Chr2:232661773-232670408	NGEF
Katnal2|Chr18:77316877-77317376	Chr18:46622880-46623488	Chr18-46622643-46623921	Chr18:46622643-46623921	KATNAL2
Fads2|Chr19:10272772-10273271	Chr11:61718395-61718900	Chr11-61715135-61720350	Chr11:61715135-61720350	FADS2
[truncated: 1,635 more rows]

## Sheet: MGI symbol change list
old symbol	MGI Gene/Marker ID	Symbol	Name
Cbwd1	MGI:2385089	Zng1	Zn regulated GTPase metalloprotein activator 1
Wars	MGI:104630	Wars1	tryptophanyl-tRNA synthetase1
Fam160b2	MGI:3036290	Fhip2b	FHF complex subunit HOOK interacting protein 2B
Lars	MGI:1913808	Lars1	leucyl-tRNA synthetase 1
C77080	MGI:2140651	Nhsl3	NHS like 3
H2afj	MGI:3606192	H2aj	H2J.A histone
Ttc26	MGI:2444853	Ift56	intraflagellar transport 56
4931428F04Rik	MGI:1921606	Matcap1	microtubule associated tyrosine carboxypeptidase 1
Zfp651	MGI:2670992	Zbtb47	zinc finger and BTB domain containing 47
Ick	MGI:1934157	Cilk1	ciliogenesis associated kinase 1
Fam104a	MGI:106351	Vcf1	VCP nuclear cofactor family member 1
2210016F16Rik	MGI:1917403	Qng1	Q-nucleotide N-glycosylase 1
Fam102b	MGI:3036259	Eeig2	EEIG family member 2
D11Wsu47e	MGI:106356	Mtnap1	mitochondrial nucleoid associated protein 1
9930104L06Rik	MGI:3041172	Airim	AFG2 interacting ribosome maturation factor
Qars	MGI:1915851	Qars1	glutaminyl-tRNA synthetase 1
March4	MGI:2683550	Marchf4	membrane associated ring-CH-type finger 4
Skiv2l	MGI:1099835	Skic2	SKI2 subunit of superkiller complex
Znrd1	MGI:1913386	Polr1h	RNA polymerase I subunit H
Fam160a2	MGI:1921599	Fhip1b	FHF complex subunit HOOK interacting protein 1B
2810004N23Rik	MGI:1913773	Fsaf1	40S small subunit processome assembly factor 1
Hars	MGI:108087	Hars1	histidyl-tRNA synthetase 1
Fam189a2	MGI:2685813	Entrep1	endosomal transmembrane epsin interactor 1
4930505A04Rik	MGI:1922337	Cimip6	ciliary microtubule inner protein 6
Fut11	MGI:1920318	Pofut4	protein O-fucosyltransferase 4
Ccdc84	MGI:2685960	Cenatac	centrosomal AT-AC splicing factor
Adssl1	MGI:87947	Adss1	adenylosuccinate synthase 1
Fam122a	MGI:1915284	Pabir1	PP2A A alpha (PPP2R1A) and B55A (PPP2R2A) interacting phosphatase regulator 1
Fam102a	MGI:2138935	Eeig1	estrogen-induced osteoclastogenesis regulator 1
Sypl	MGI:108081	Sypl1	synaptophysin like 1
March3	MGI:2443667	Marchf3	membrane associated ring-CH-type finger 3
4921507P07Rik	MGI:1918071	Spmip4	sperm microtubule inner protein 4
March9	MGI:2446144	Marchf9	membrane associated ring-CH-type finger 9
Mars	MGI:1345633	Mars1	methionine-tRNA synthetase 1
Mpp5	MGI:1927339	Pals1	protein associated with LIN7 1, MAGUK family member
4932438H23Rik	MGI:1921637	Epcip	exosomal polycystin 1 interacting protein
9030025P20Rik	MGI:3583895	Ermardl2	ER membrane associated RNA degradation like 2
Gm3435	MGI:3810125	Ermardl1	ER membrane associated RNA degradation like 1
Ctps	MGI:1858304	Ctps1	cytidine 5'-triphosphate synthase 1
Akr1b3	MGI:1353494	Akr1b1	aldo-keto reductase family 1 member B
1110032A03Rik	MGI:1915971	Cfap68	cilia and flagella associated protein 68
Fam71d	MGI:1918147	Garin2	golgi associated RAB2 interactor 2
Casc4	MGI:2443129	Golm2	golgi membrane protein 2
1810037I17Rik	MGI:1914954	Arln	allregulin
1700029J07Rik	MGI:1916729	Cfap96	cilia and flagella associated protein 96
Dars	MGI:2442544	Dars1	aspartyl-tRNA synthetase 1
Uhrf1bp1	MGI:3041238	Bltp3a	bridge-like lipid transfer protein family member 3A
Gba	MGI:95665	Gba1	glucosylceramidase beta 1
Fam192a	MGI:1919637	Psme3ip1	proteasome activator subunit 3 interacting protein 1
3830406C13Rik	MGI:1917937	Cep15	centrosomal protein 15
BC003965	MGI:2670966	Uqcc4	ubiquinol-cytochrome c reductase complex assembly factor 4
Nars	MGI:1917473	Nars1	asparaginyl-tRNA synthetase 1
March5	MGI:1915207	Marchf5	membrane associated ring-CH-type finger 5
